# Supplementary material for: Cerebrospinal Fluid and Plasma Metabolites with Parkinson’s Disease: A Mendelian Randomization Study
Source: bioRxiv or medRxiv preprint supplement (doi:10.1101/2024.07.19.24310687), 2024-07-19

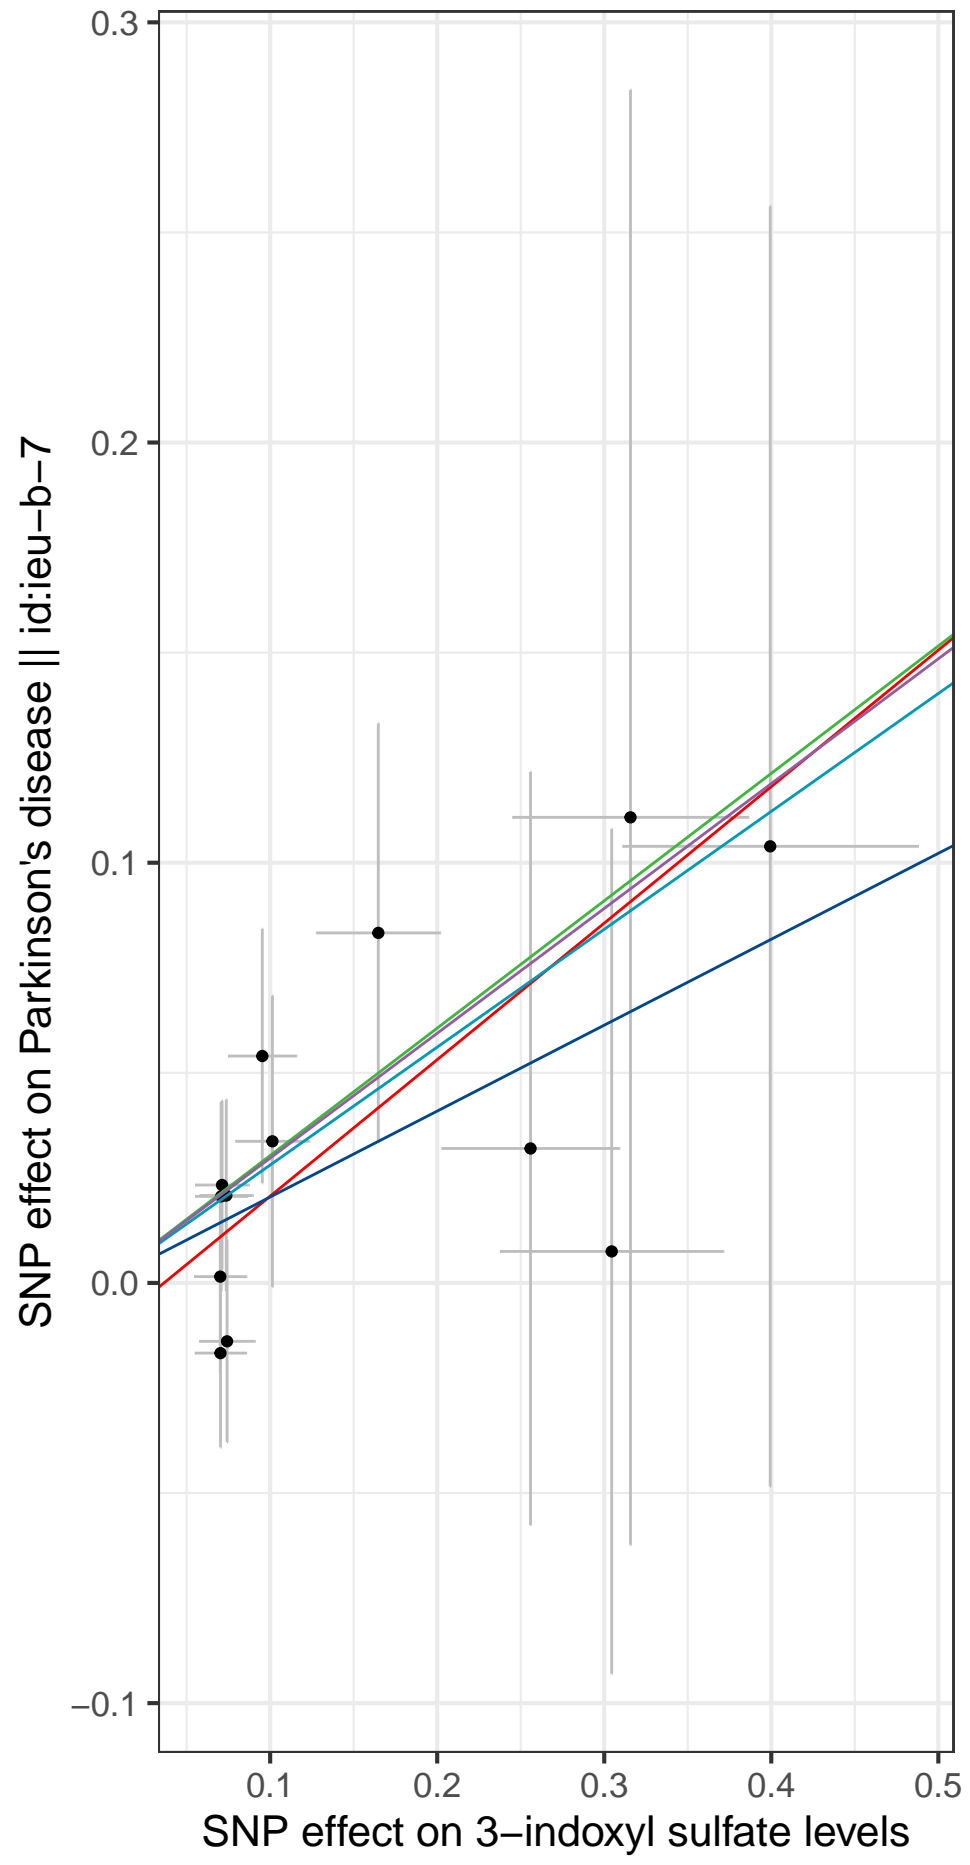

MR Test

- Inverse variance weighted
- MR Egger
- Simple mode
- Weighted median
- Weighted mode

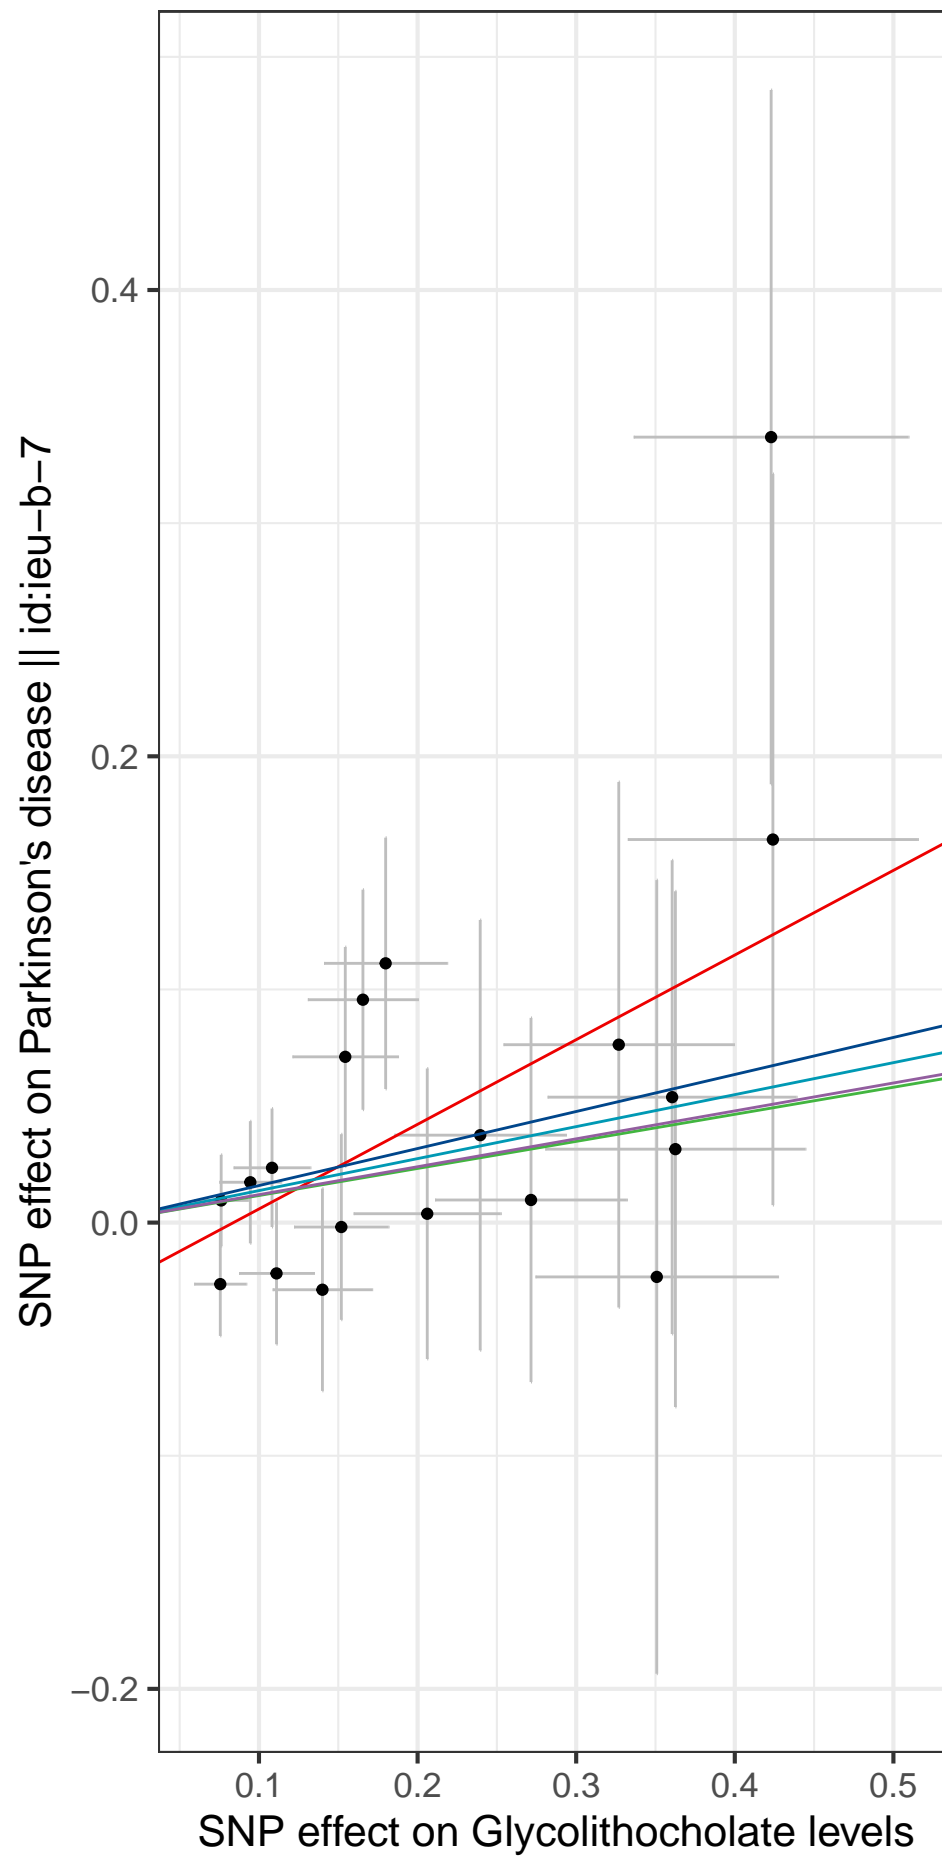

- MR Test
- Inverse variance weighted
  - MR Egger
  - Simple mode
  - Weighted median
  - Weighted mode

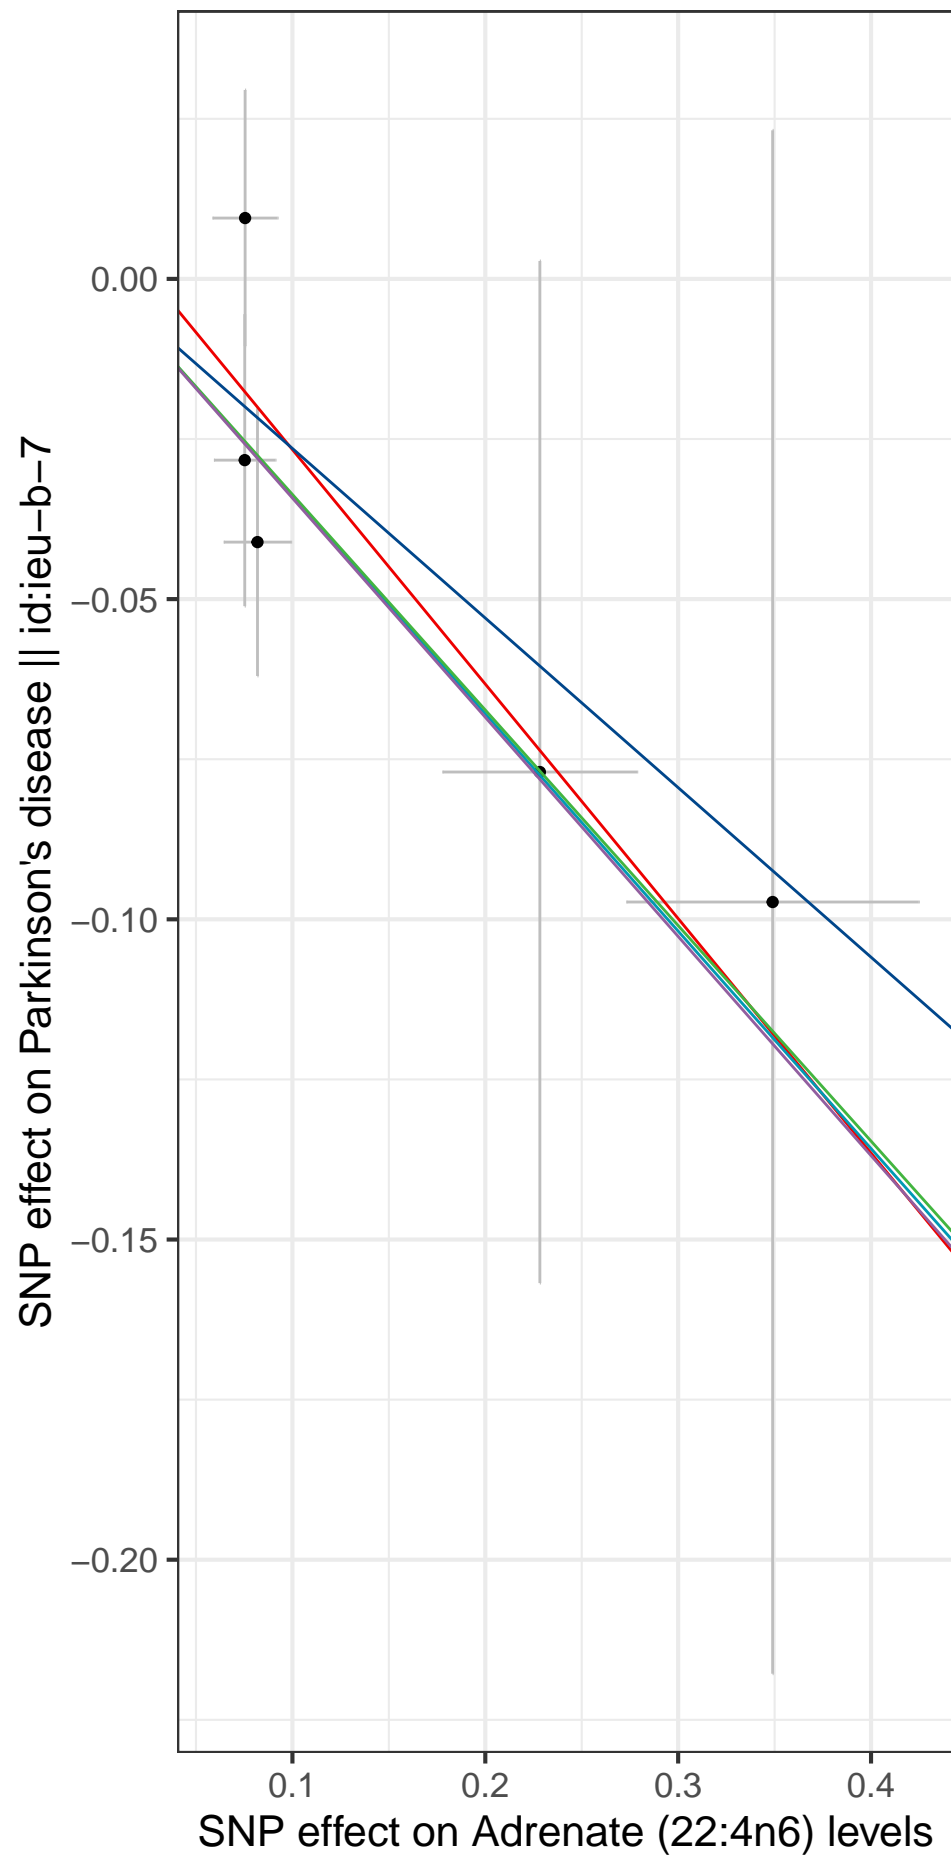

- MR Test
- Inverse variance weighted
  - MR Egger
  - Simple mode
  - Weighted median
  - Weighted mode

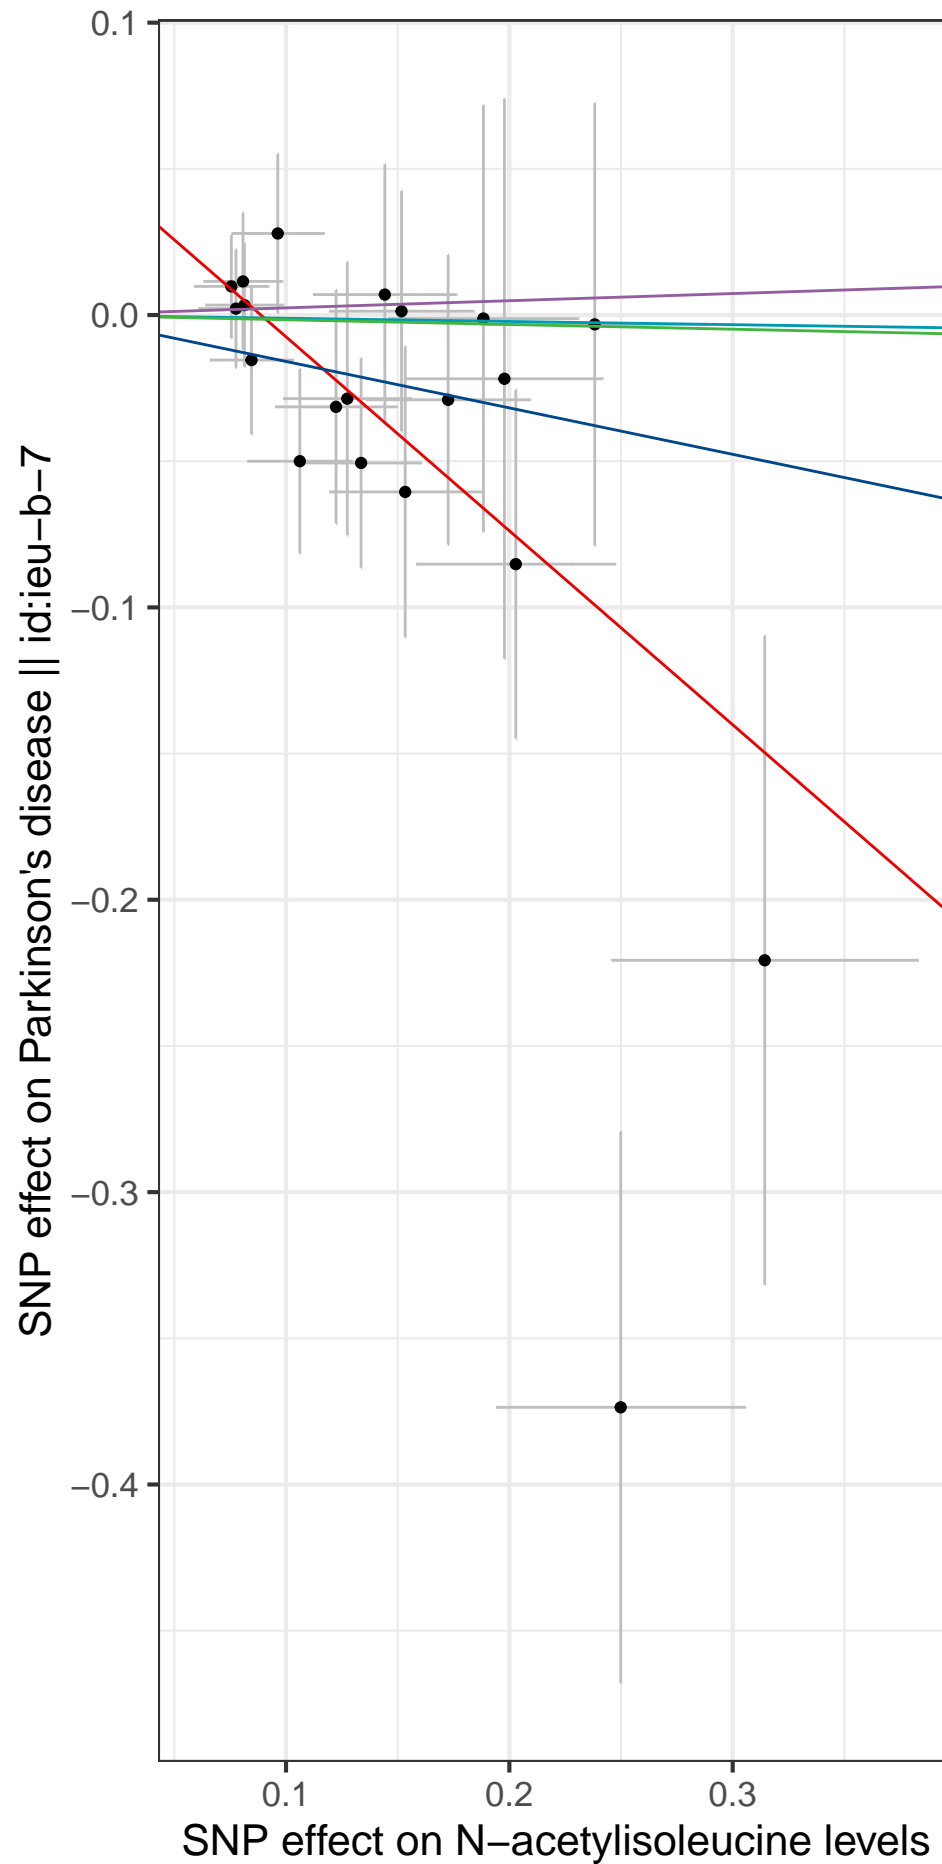

MR Test

- Inverse variance weighted
- MR Egger
- Simple mode
- Weighted median
- Weighted mode

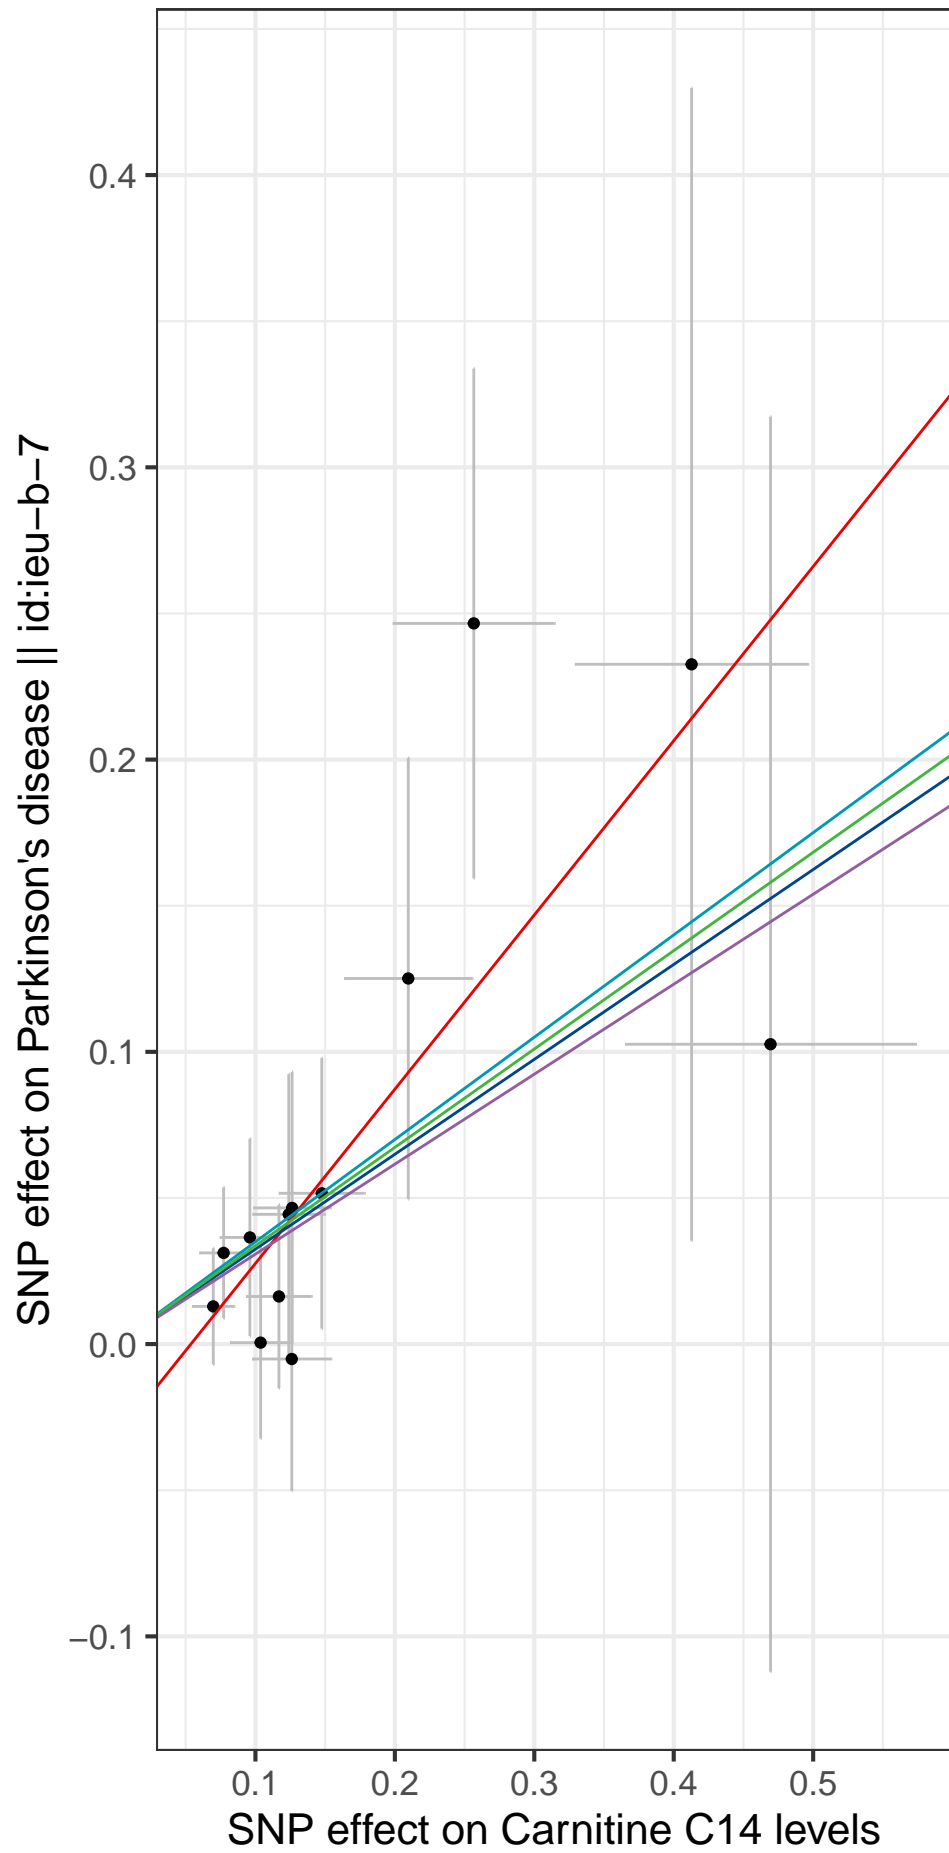

MR Test

- Inverse variance weighted
- MR Egger
- Simple mode
- Weighted median
- Weighted mode

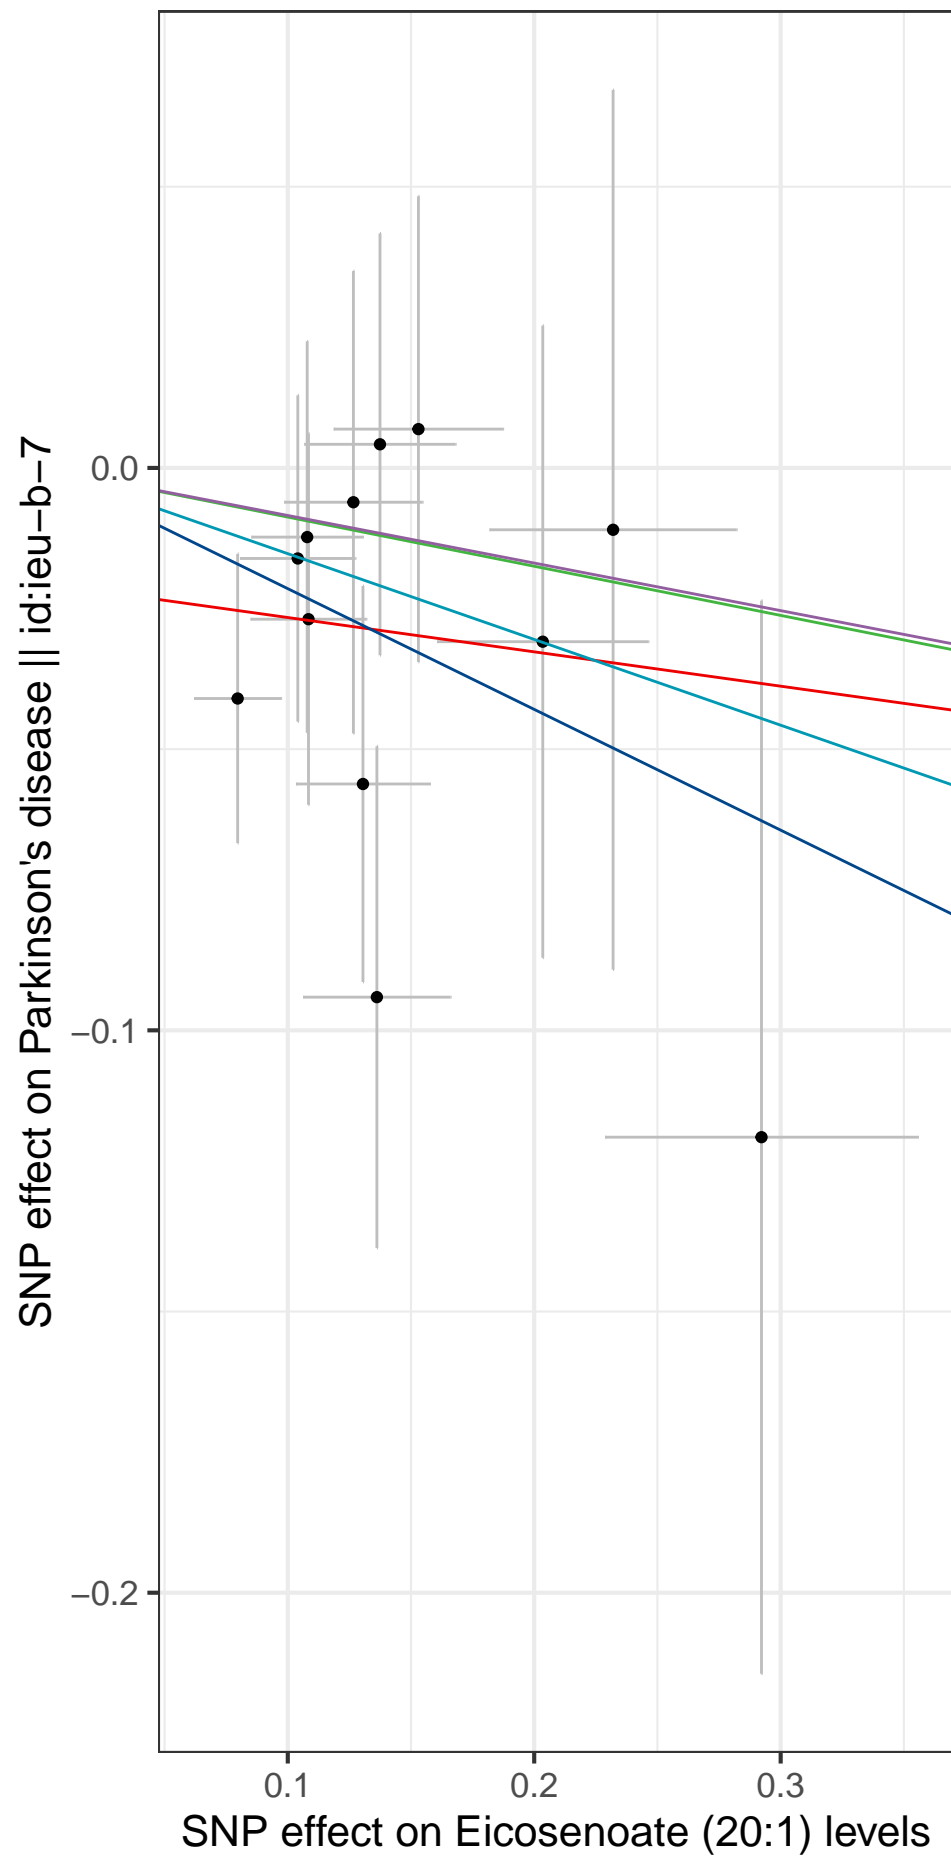

- MR Test
- Inverse variance weighted
  - MR Egger
  - Simple mode
  - Weighted median
  - Weighted mode

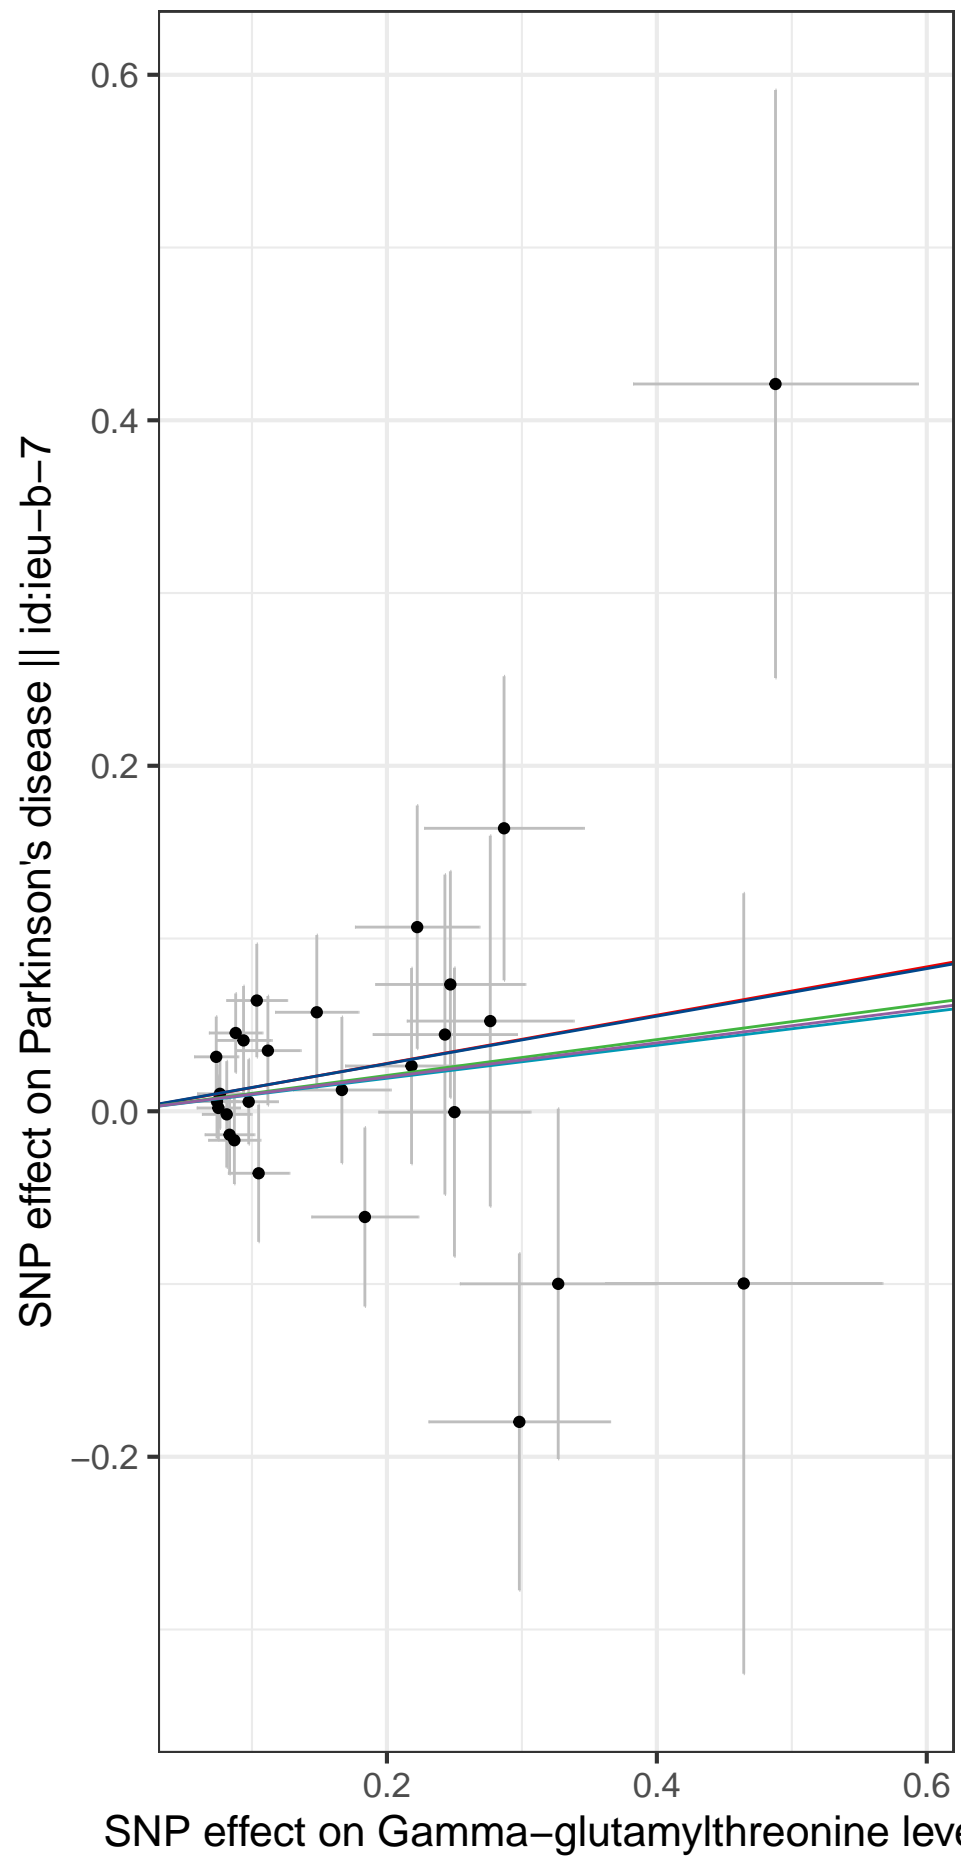

- MR Test
- Inverse variance weighted
  - MR Egger
  - Simple mode
  - Weighted median
  - Weighted mode

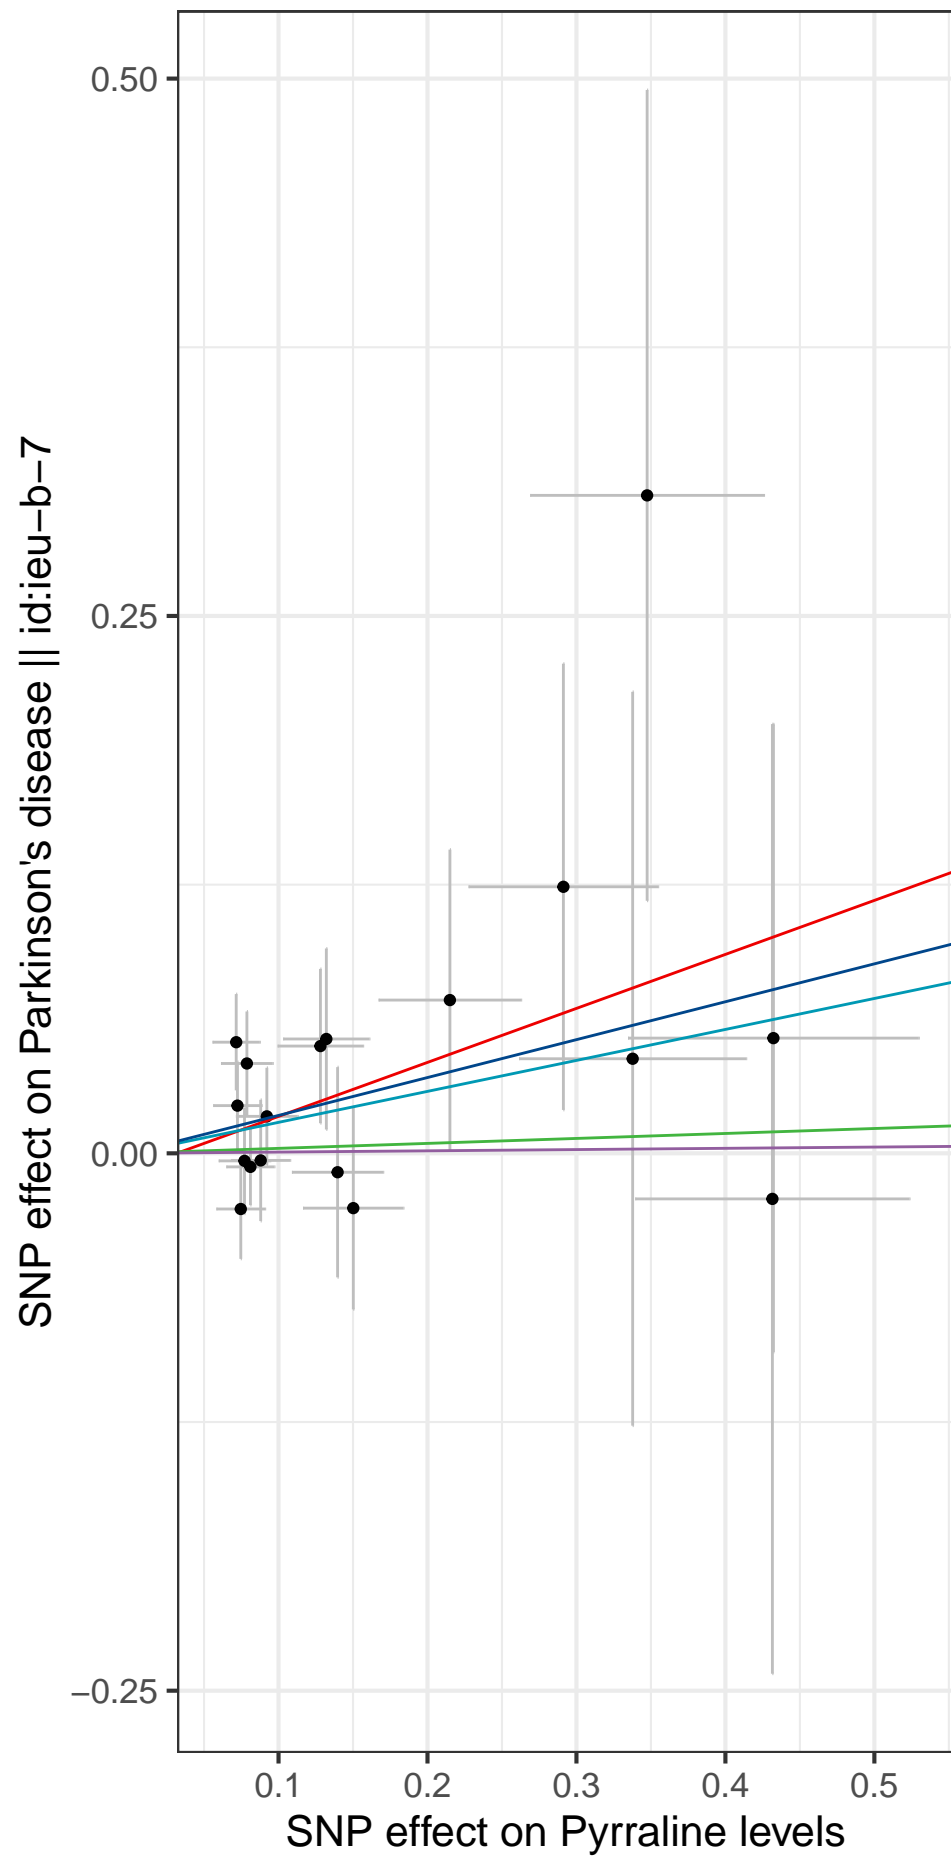

- MR Test
- Inverse variance weighted
  - MR Egger
  - Simple mode
  - Weighted median
  - Weighted mode



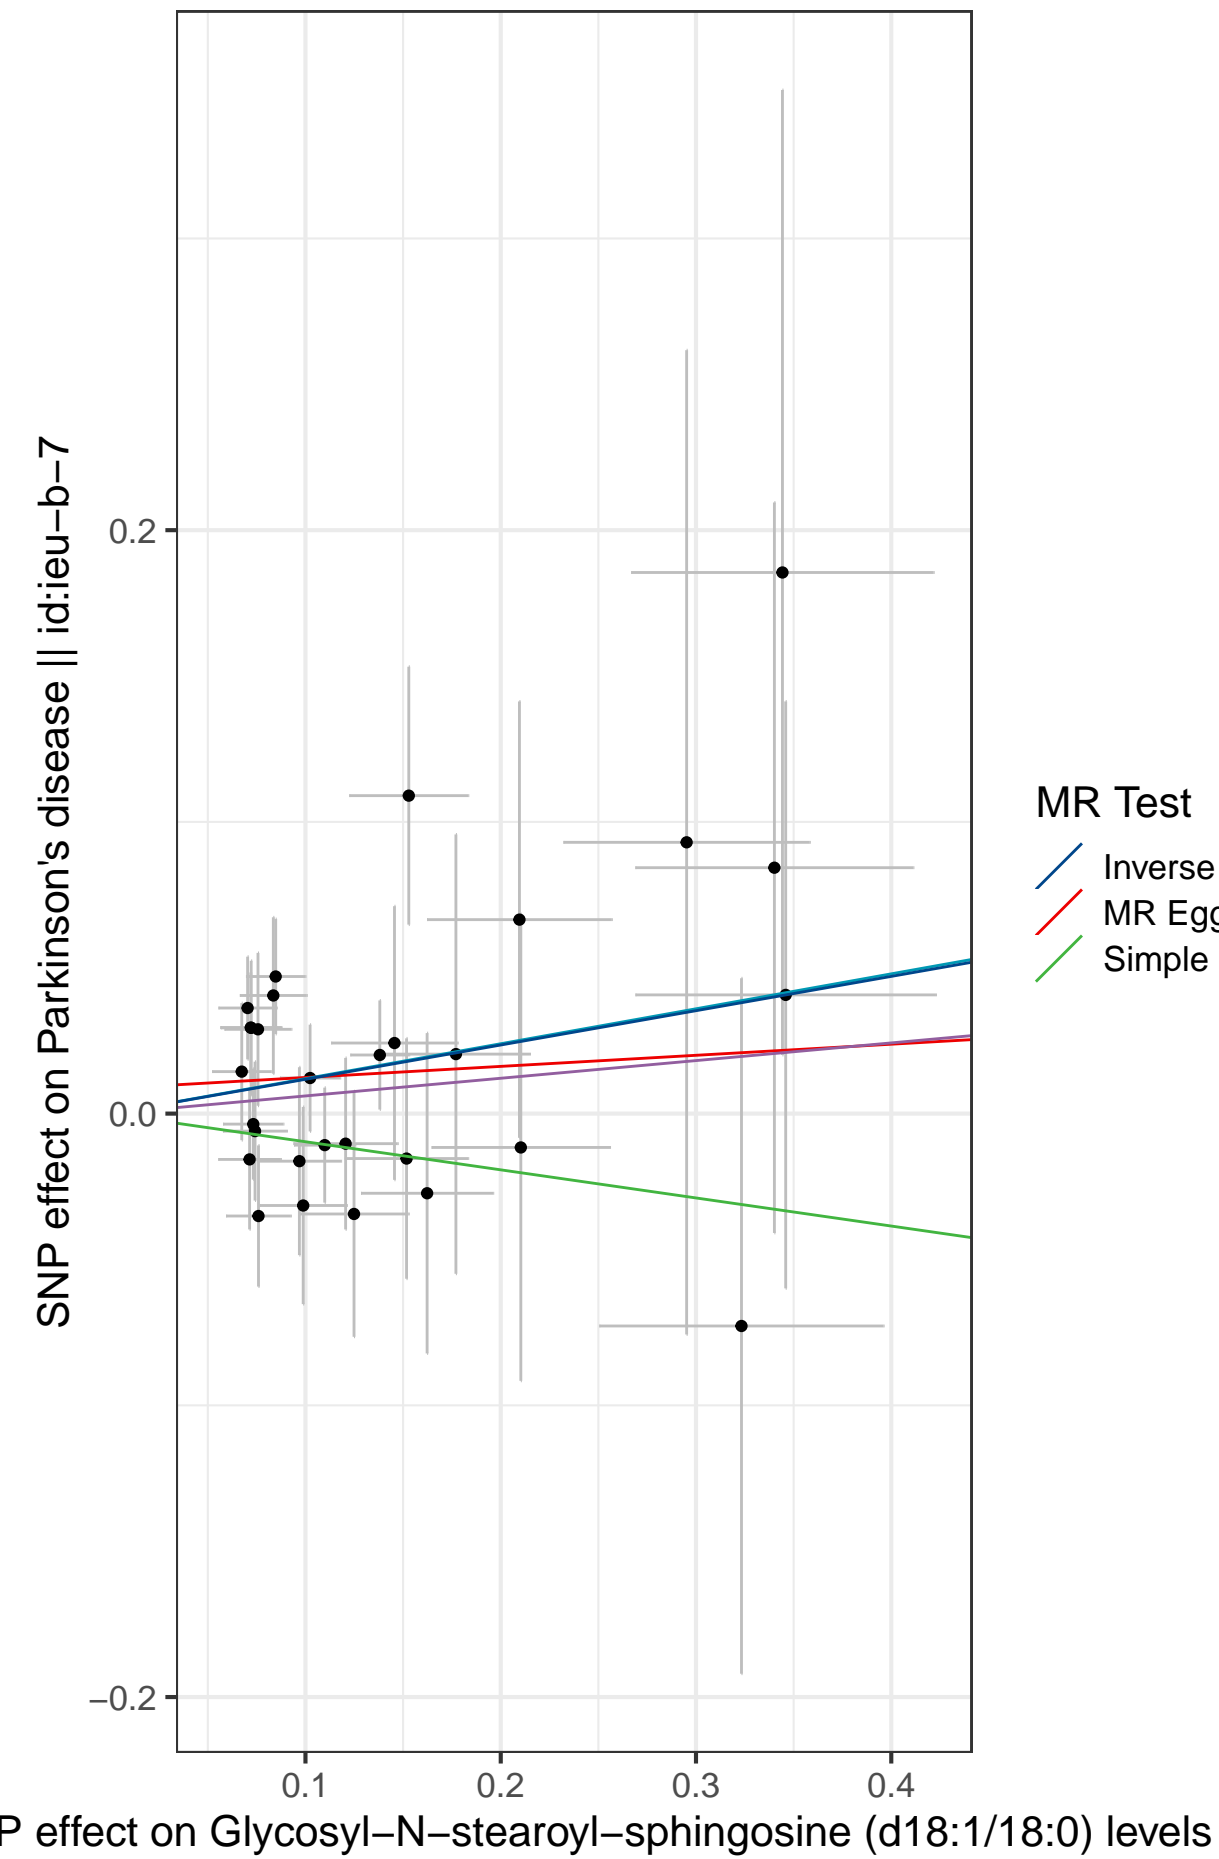

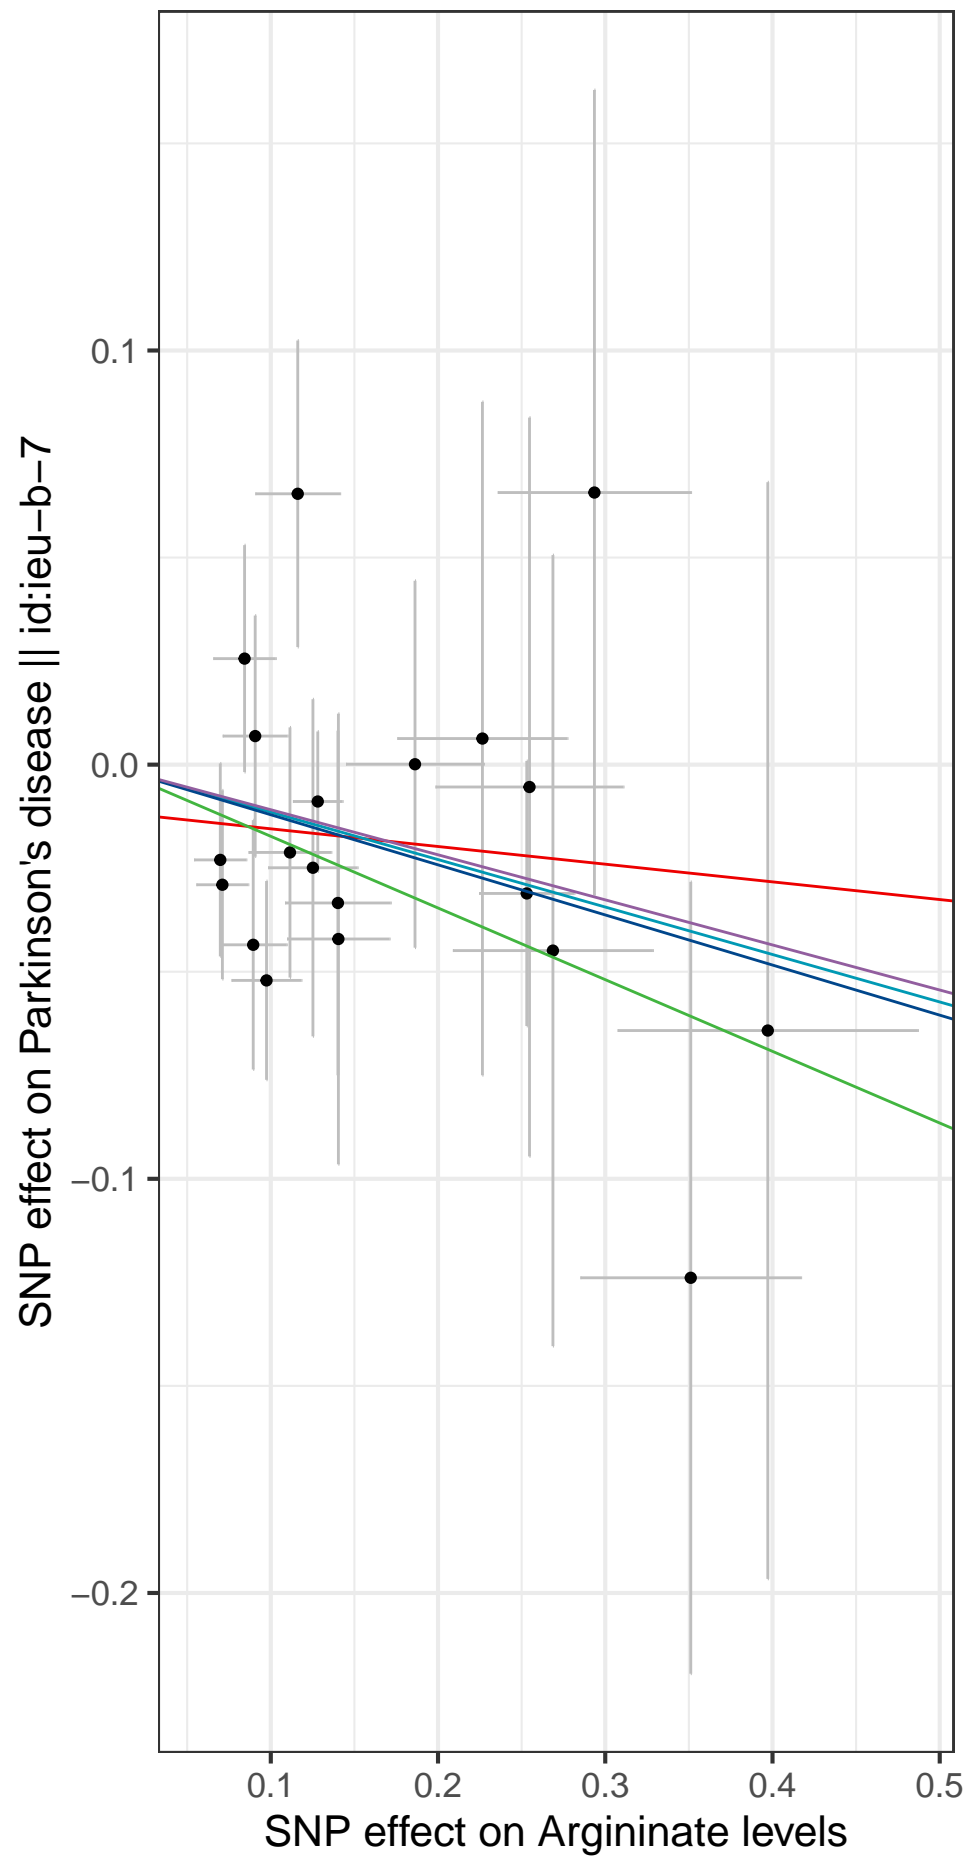

- MR Test
- Inverse variance weighted
  - MR Egger
  - Simple mode
  - Weighted median
  - Weighted mode

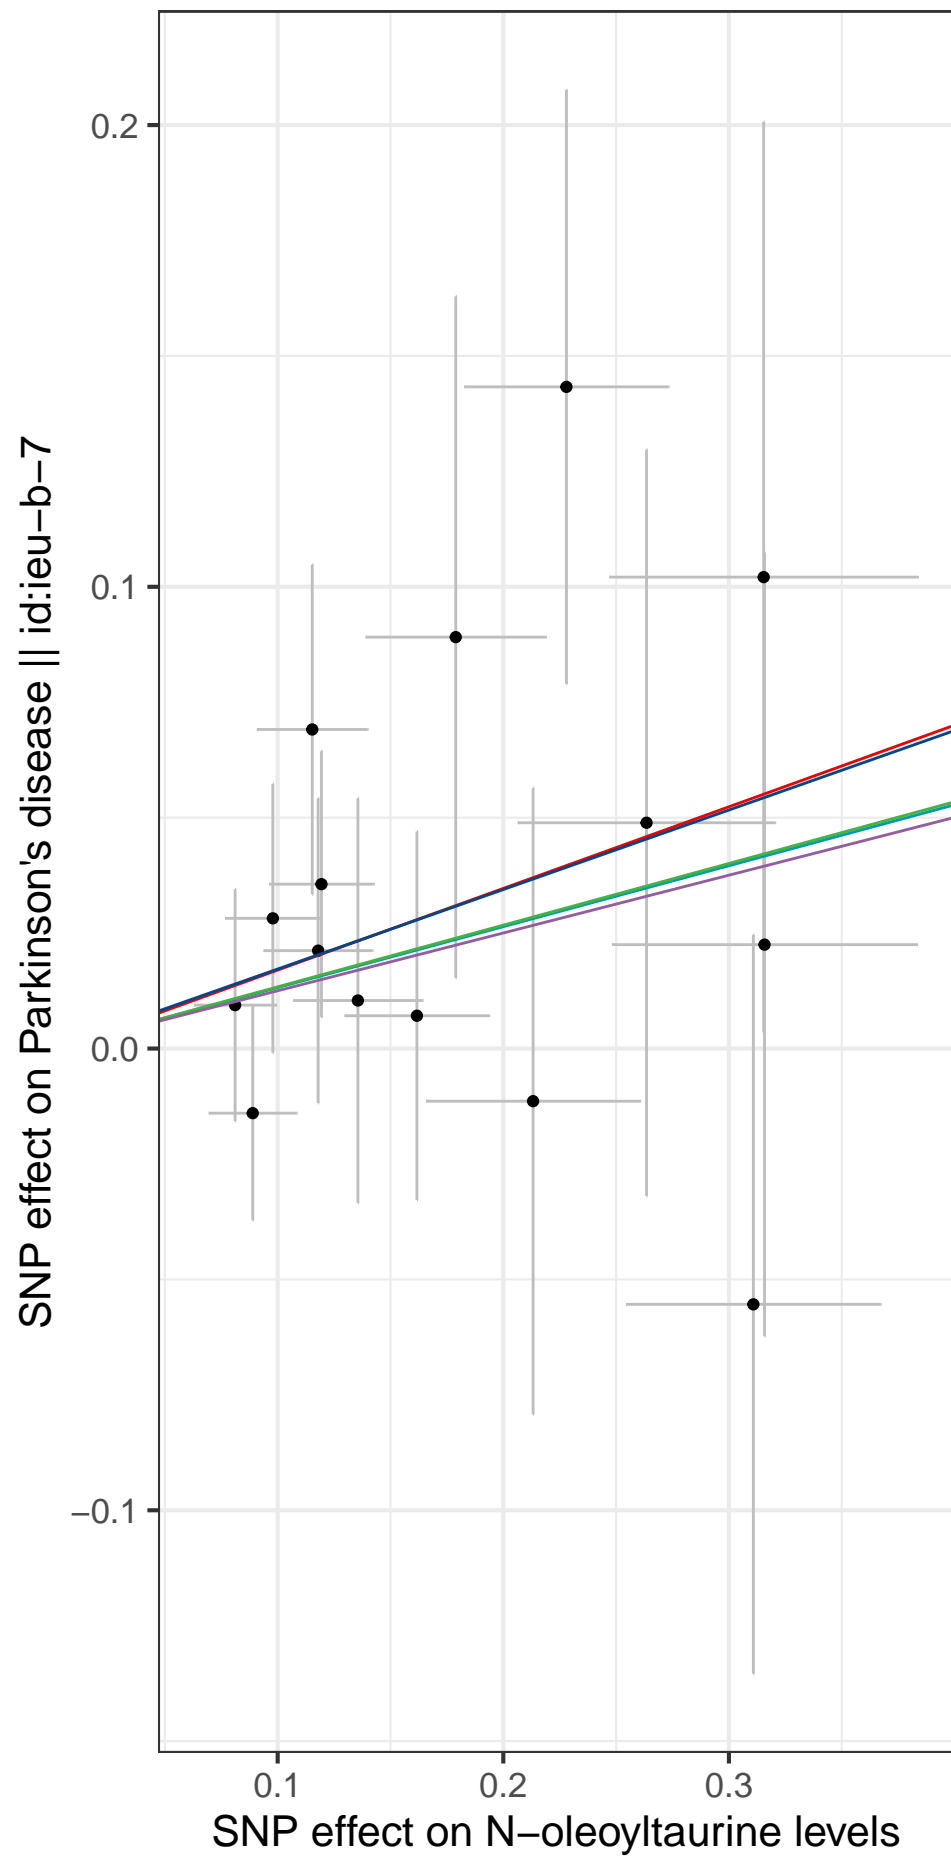

MR Test

- Inverse variance weighted
- MR Egger
- Simple mode
- Weighted median
- Weighted mode

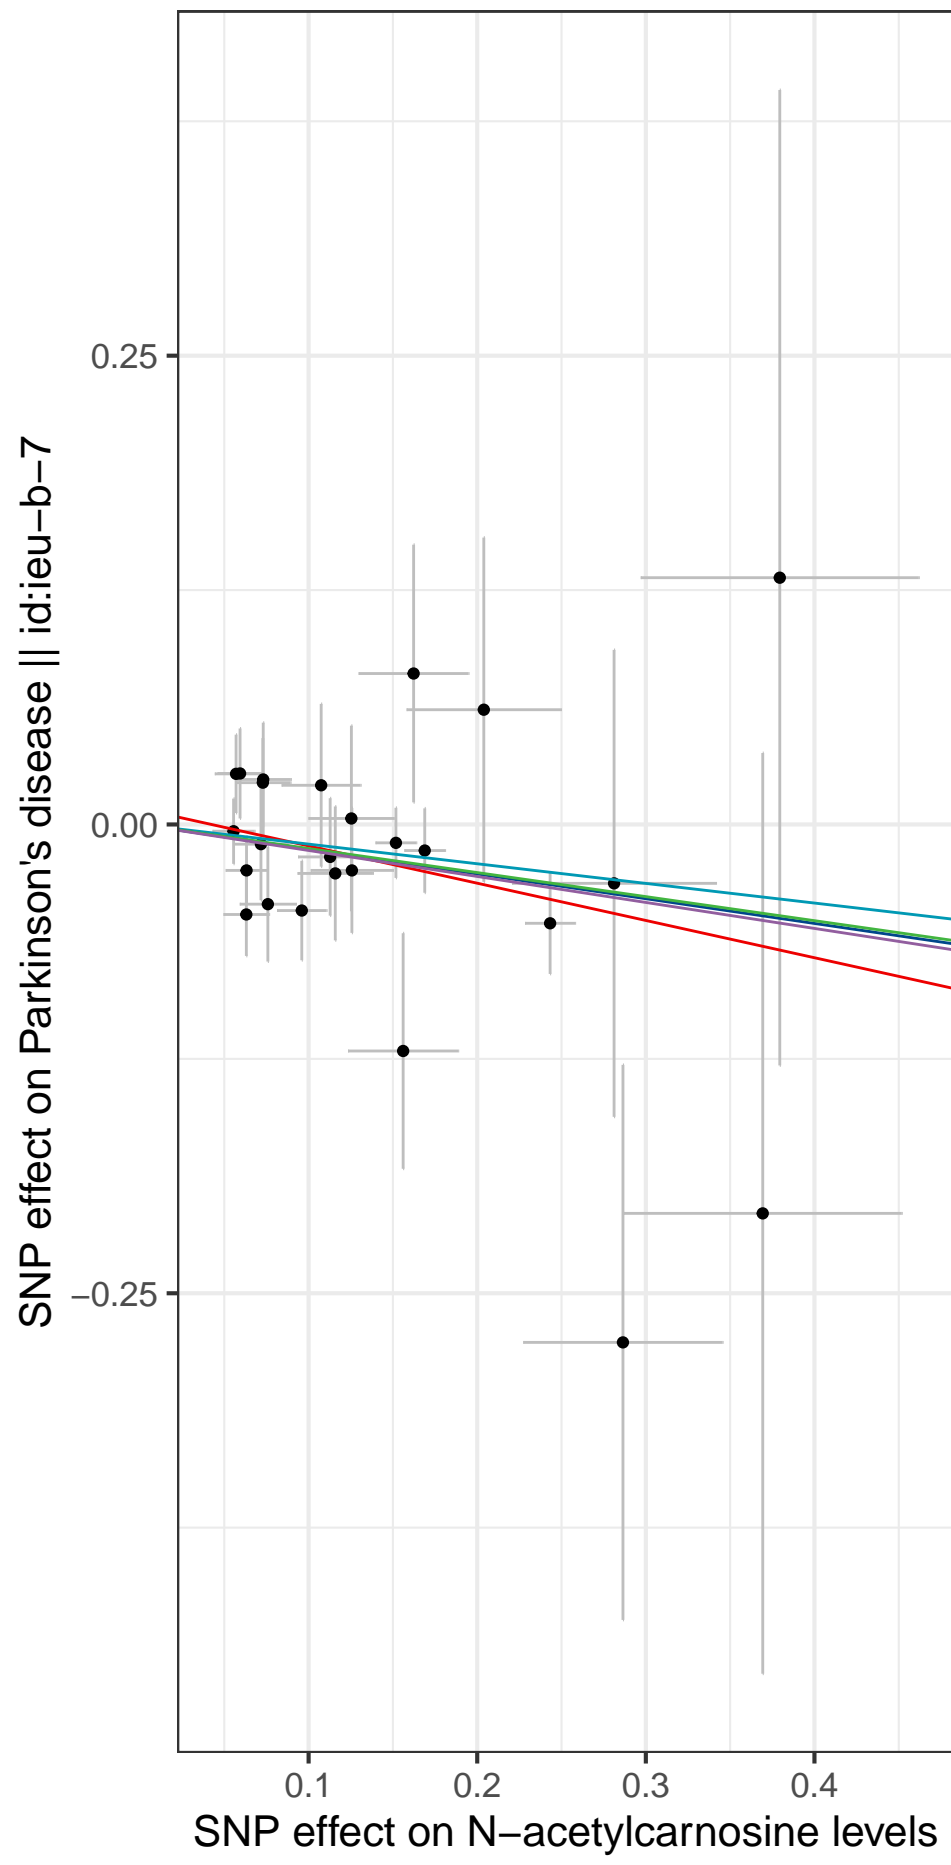

MR Test

- Inverse variance weighted
- MR Egger
- Simple mode
- Weighted median
- Weighted mode

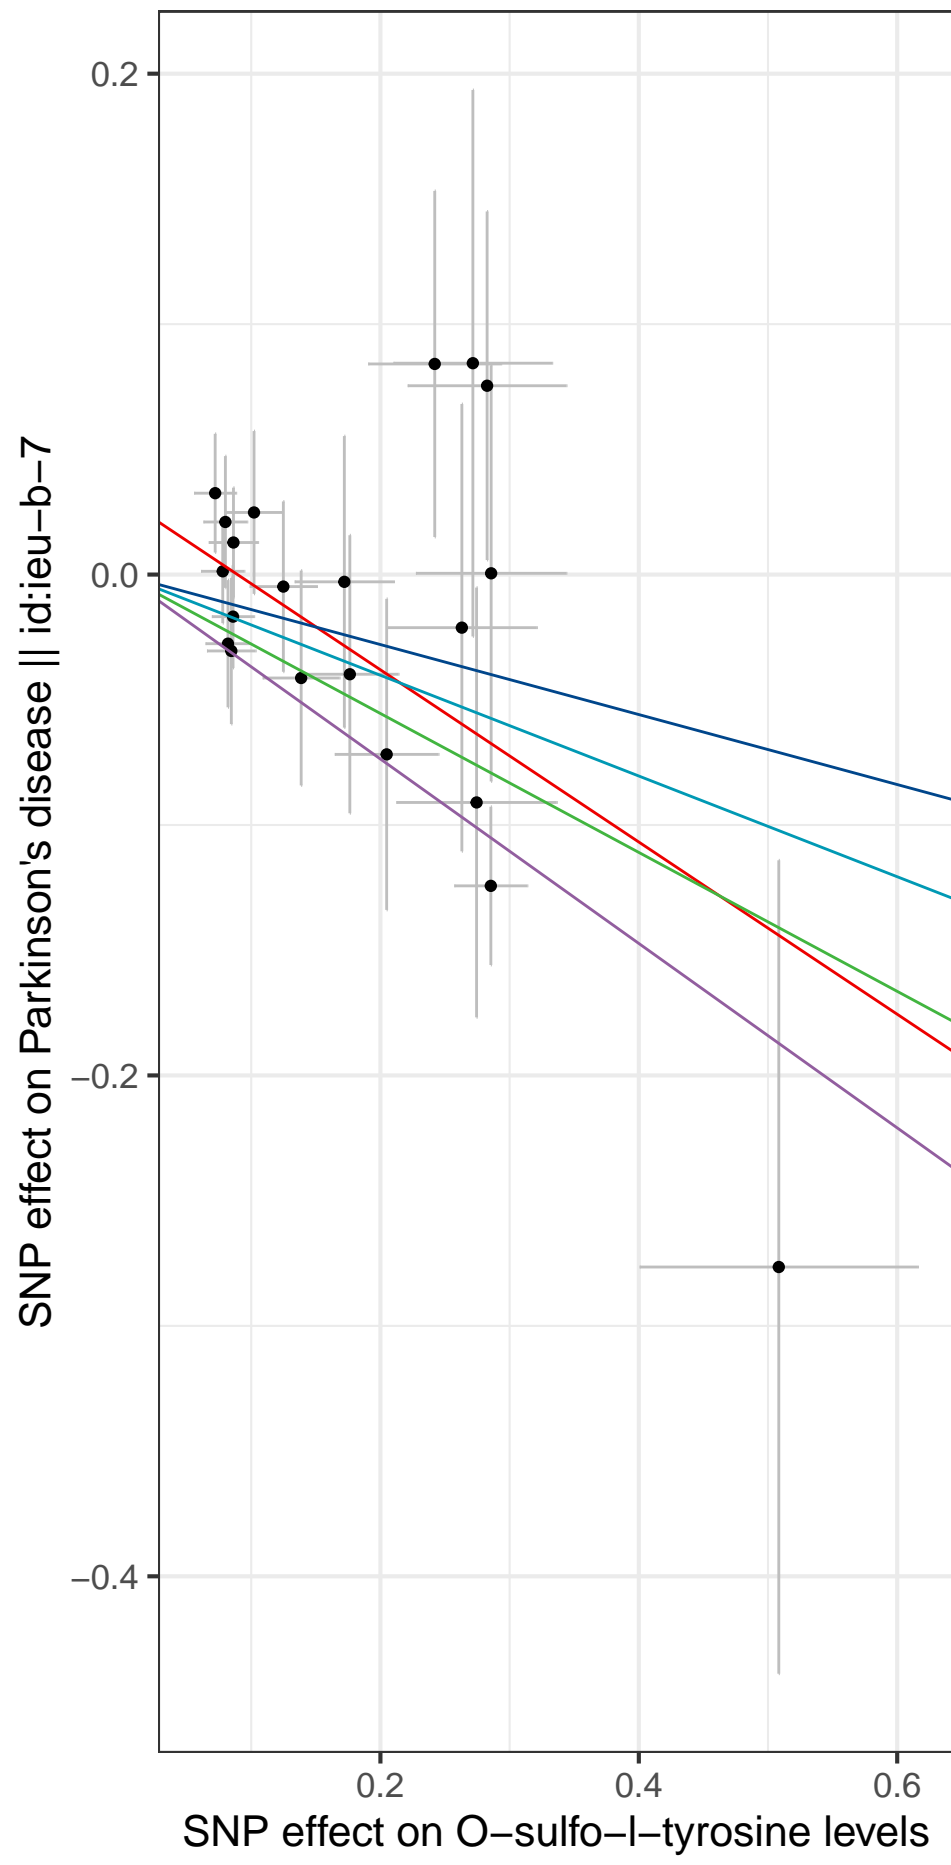

- MR Test
- Inverse variance weighted
  - MR Egger
  - Simple mode
  - Weighted median
  - Weighted mode

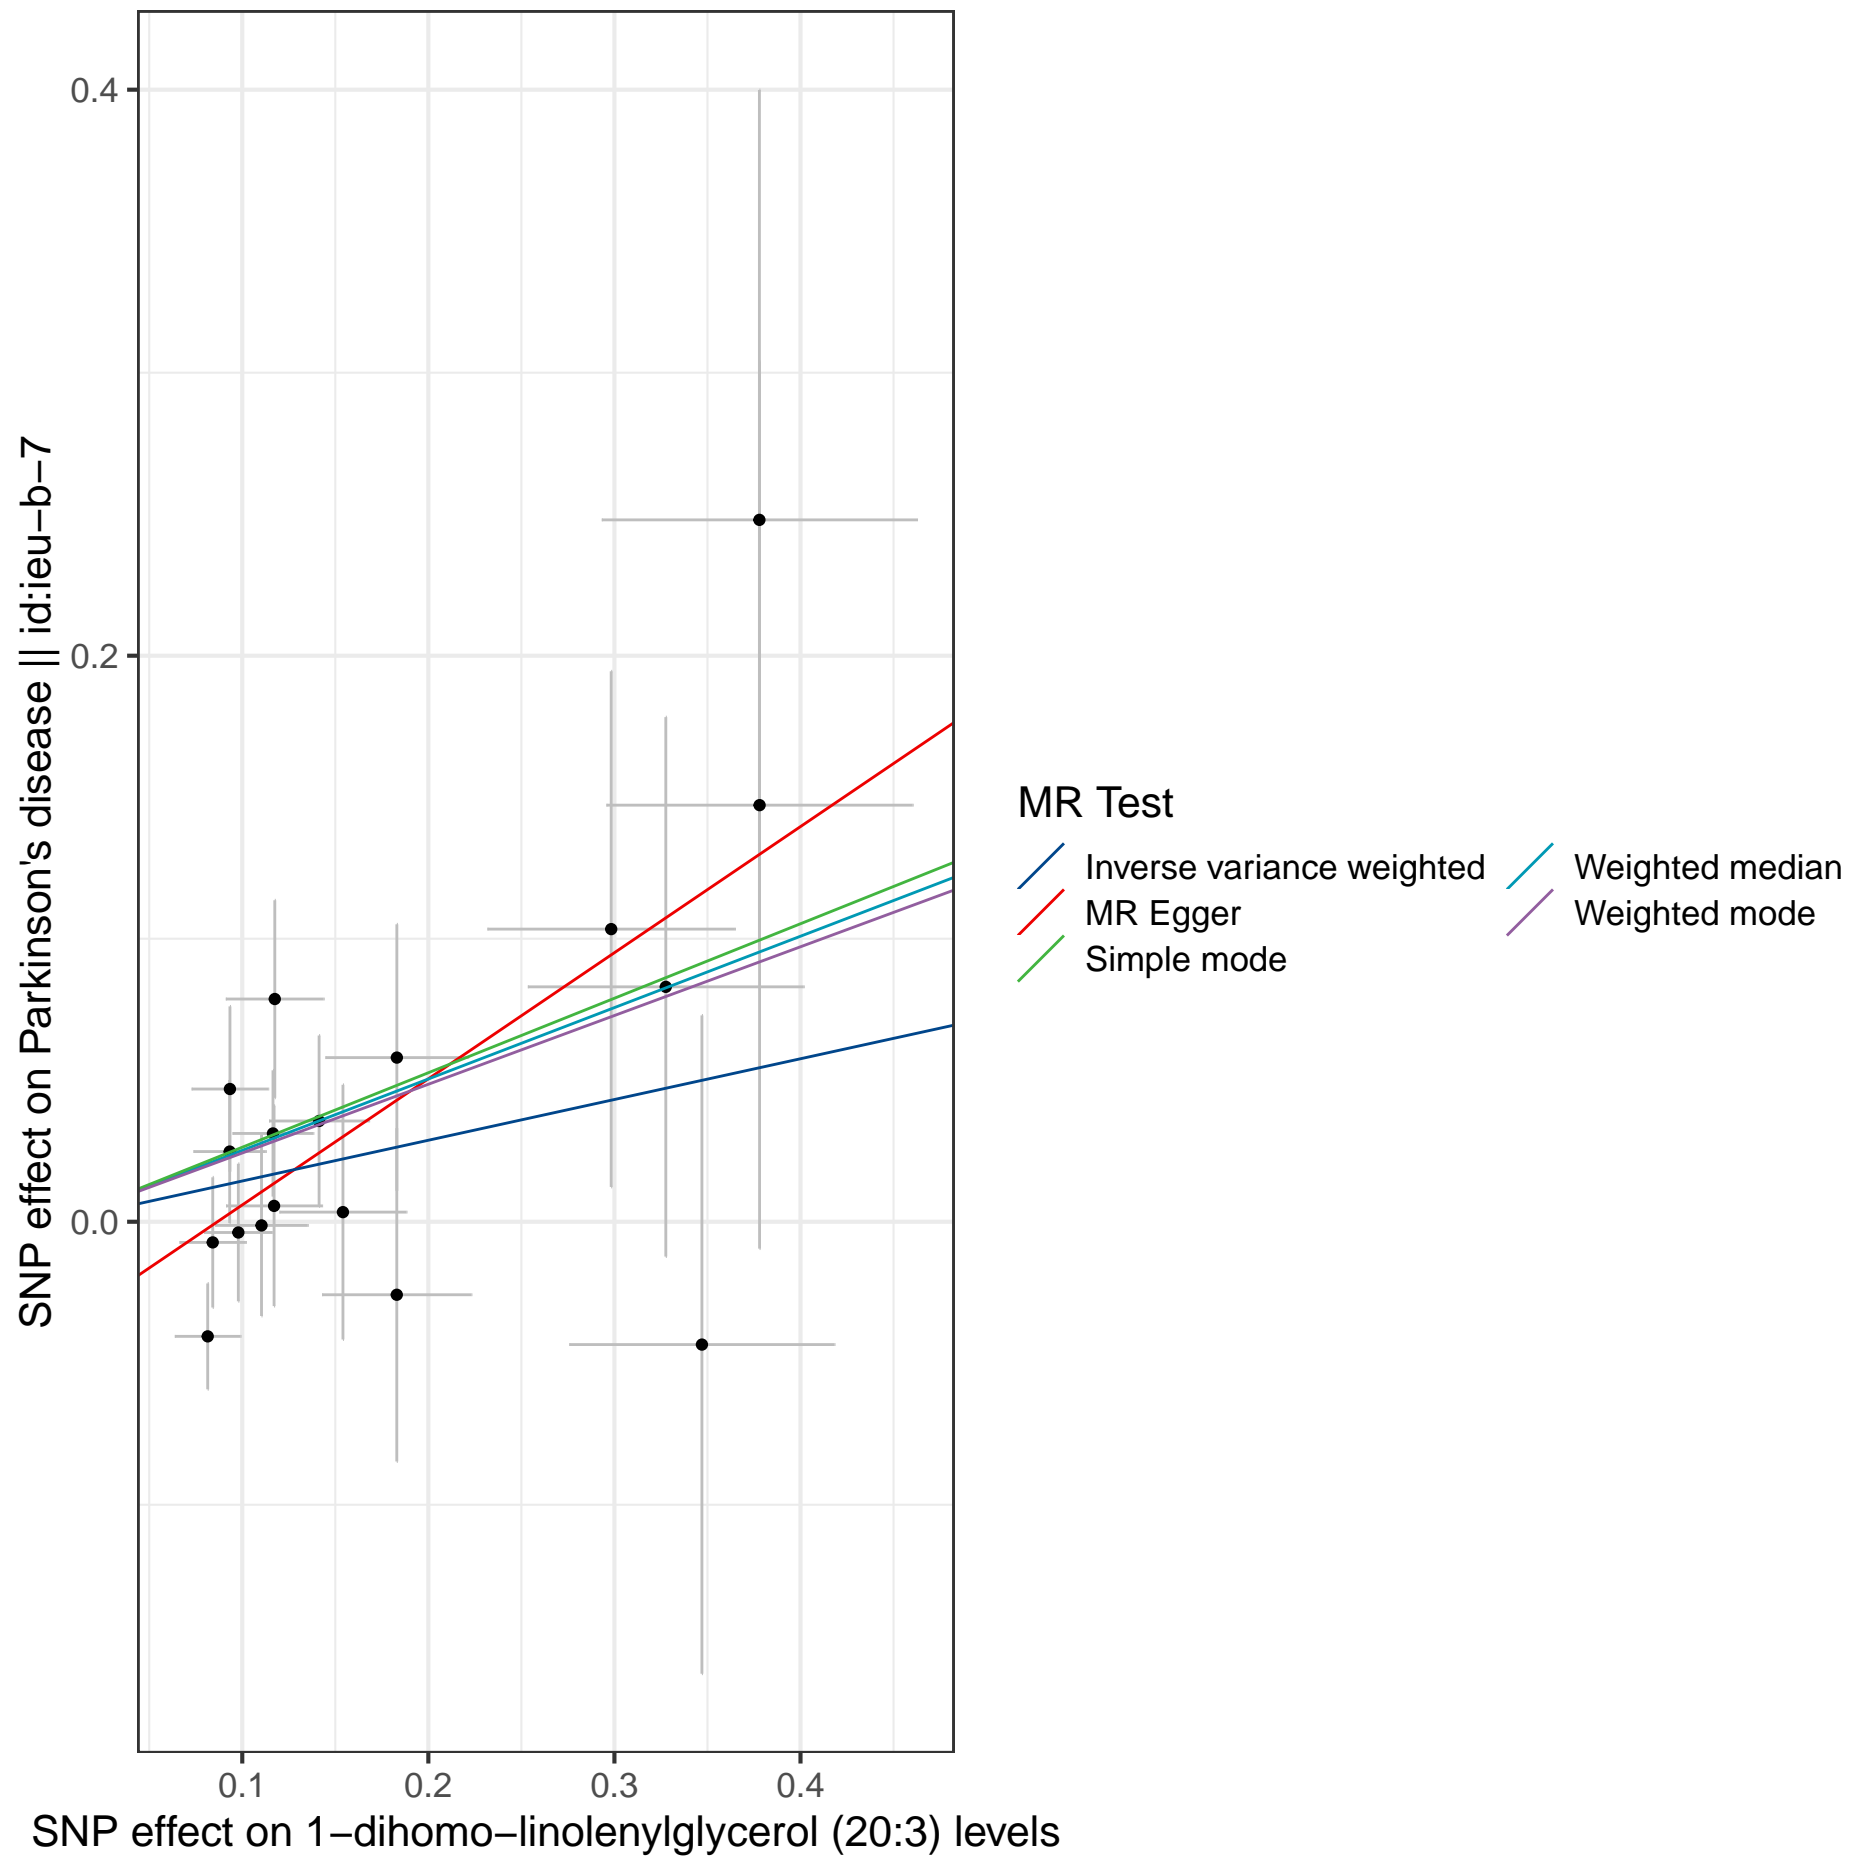

SNP effect on Parkinson's disease || id:ieu-b-7

MR Test

- Inverse variance weighted
- MR Egger
- Simple mode
- Weighted median
- Weighted mode

SNP effect on 1-dihomo-linolenylglycerol (20:3) levels

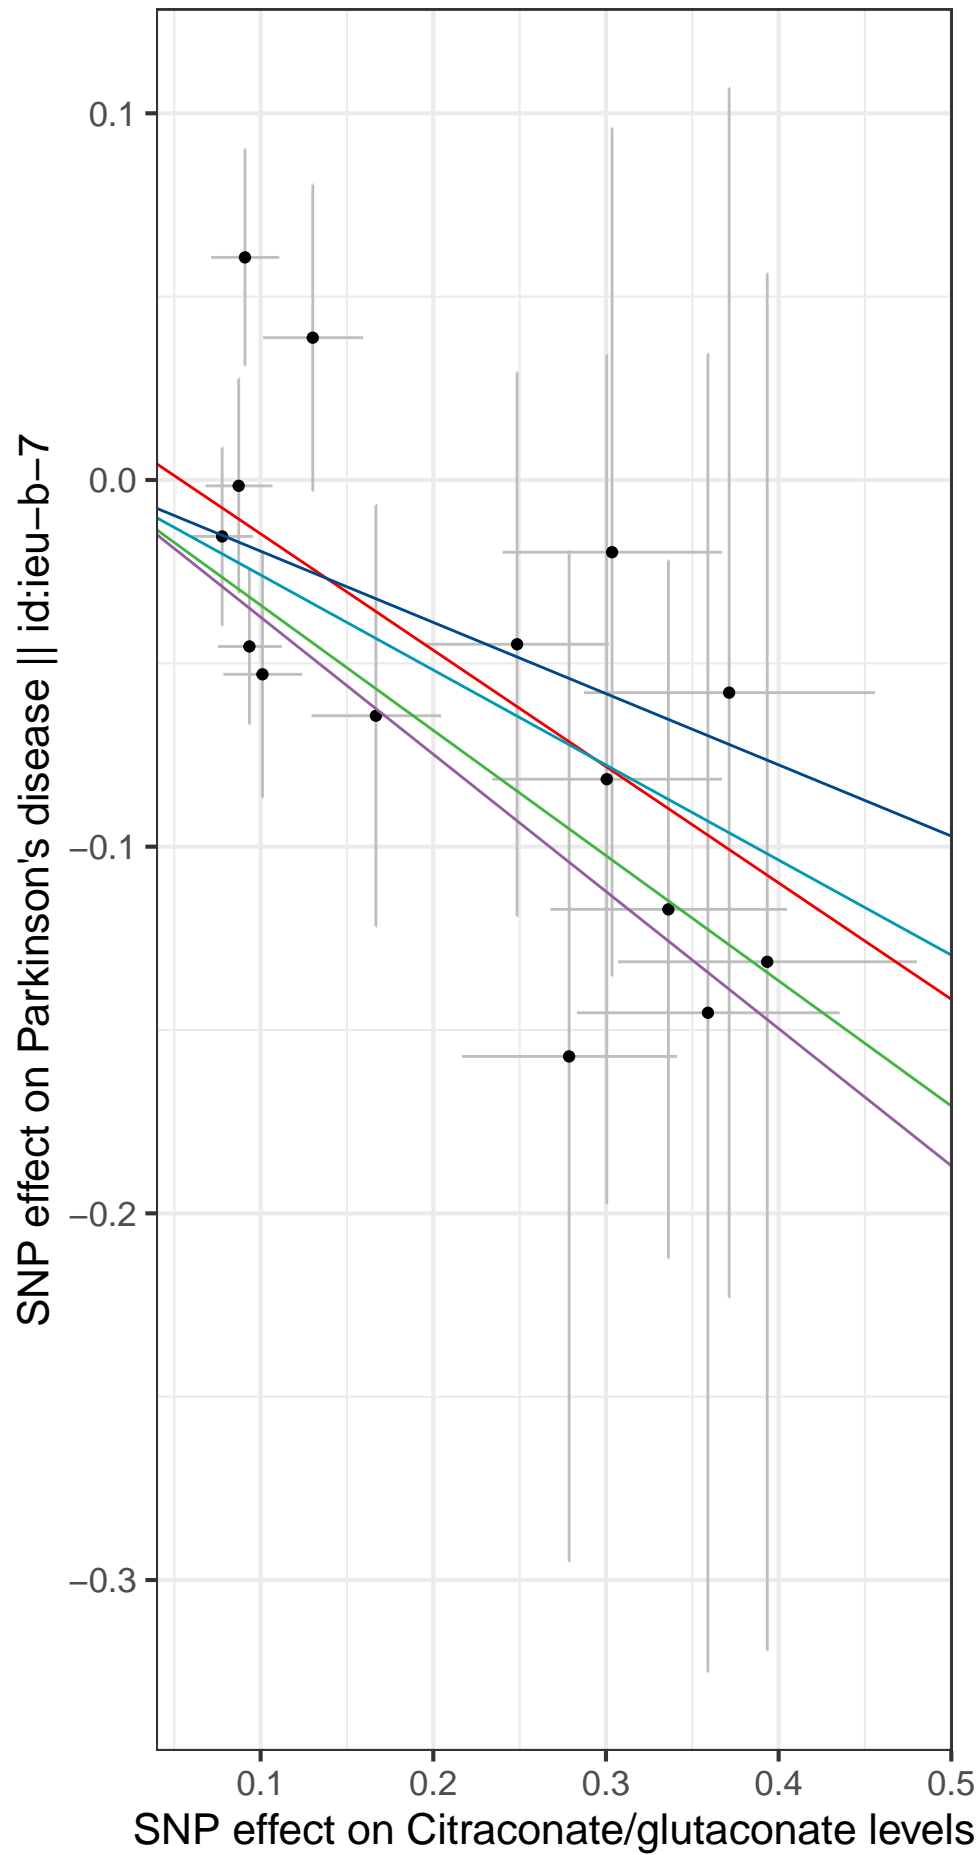

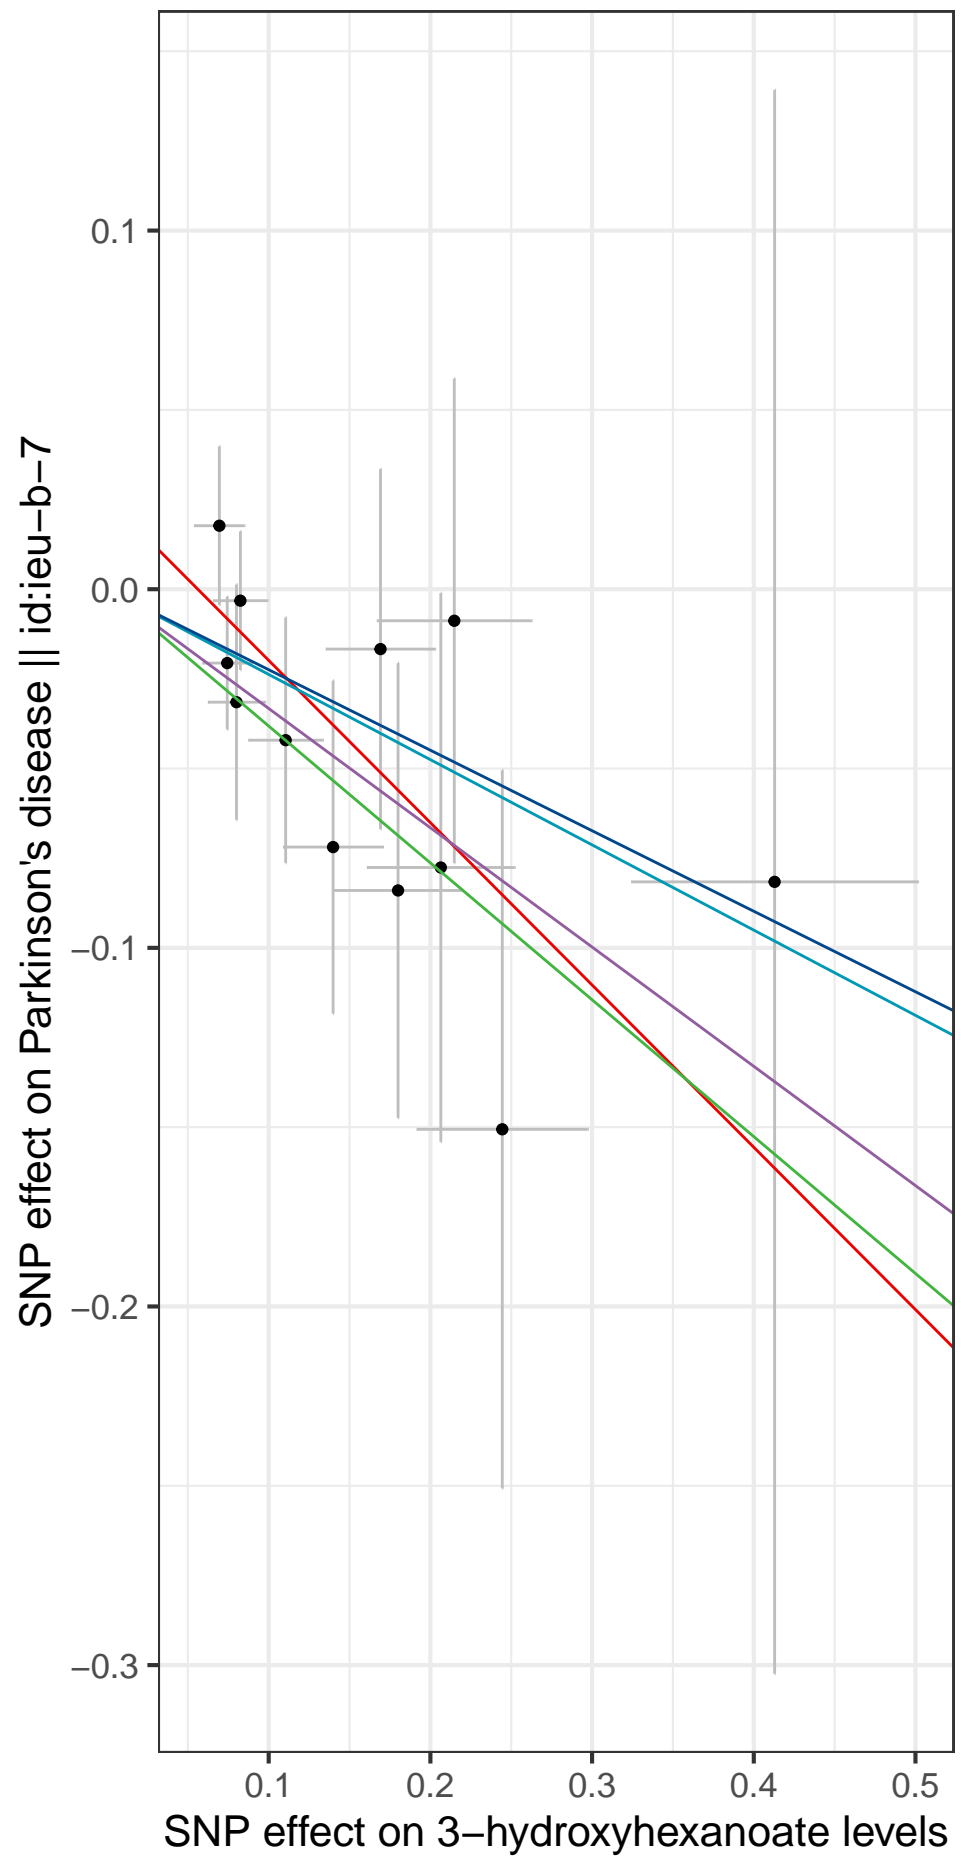

MR Test

- Inverse variance weighted
- MR Egger
- Simple mode
- Weighted median
- Weighted mode



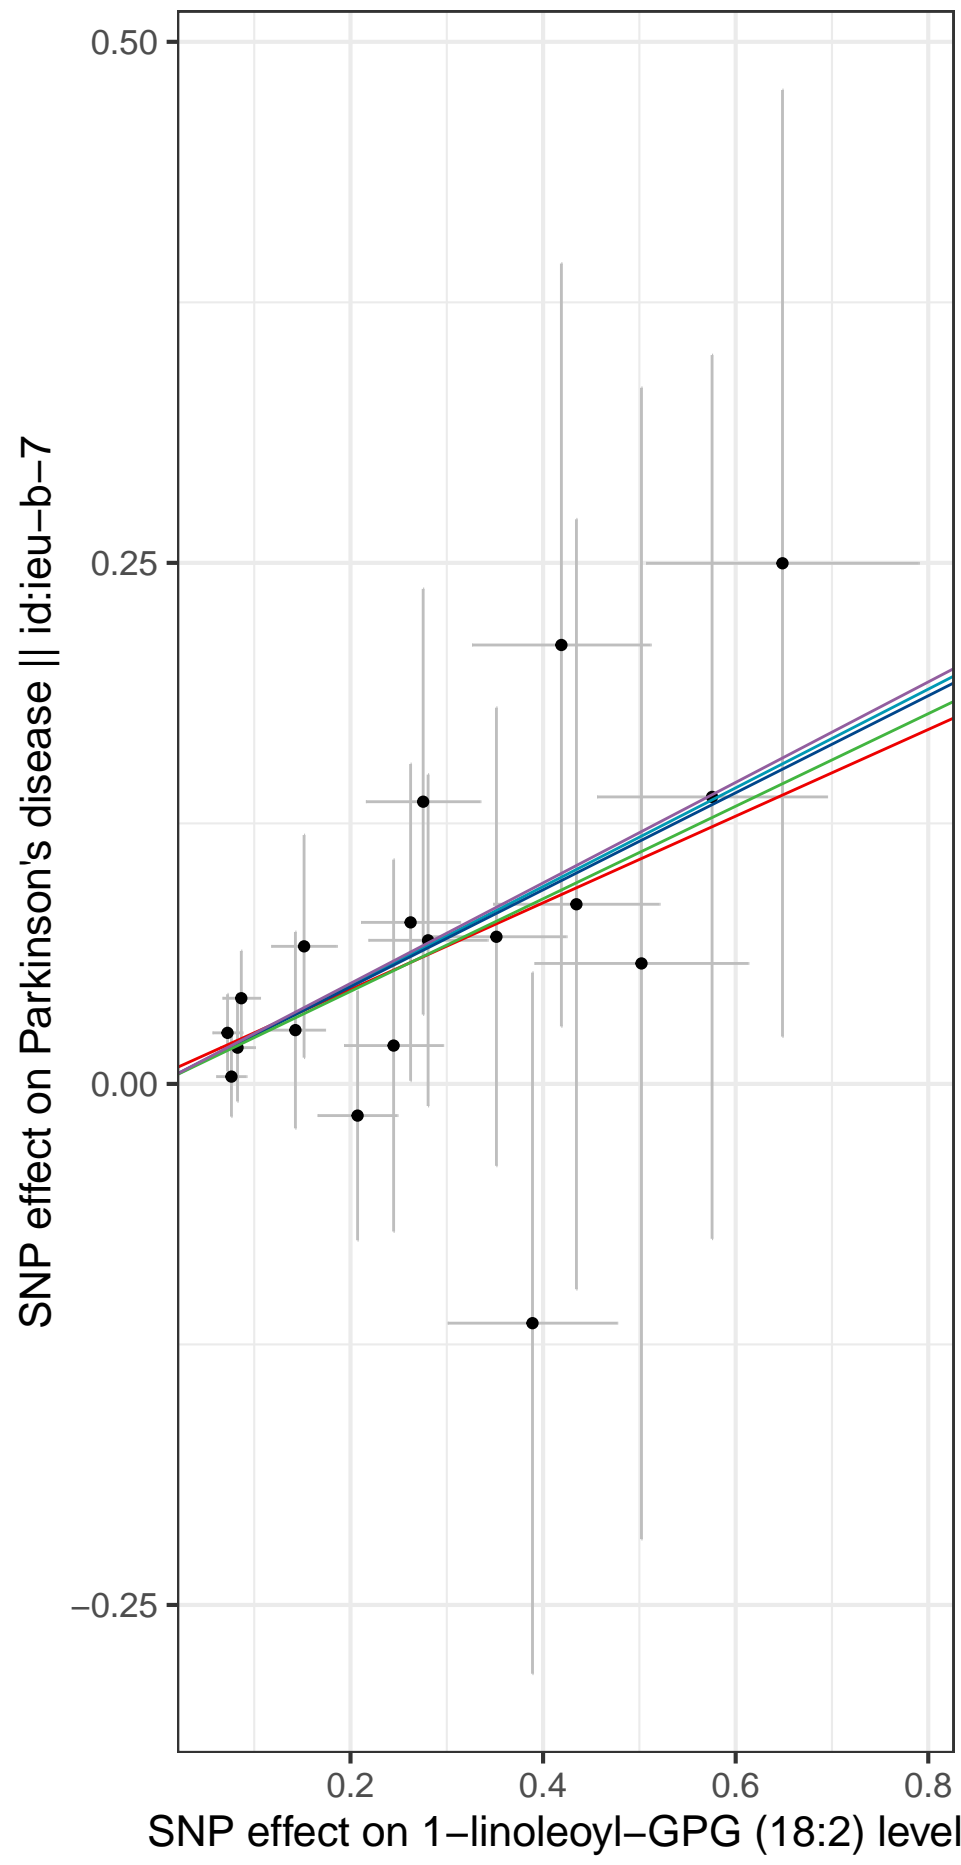

MR Test

- Inverse variance weighted
- MR Egger
- Simple mode
- Weighted median
- Weighted mode

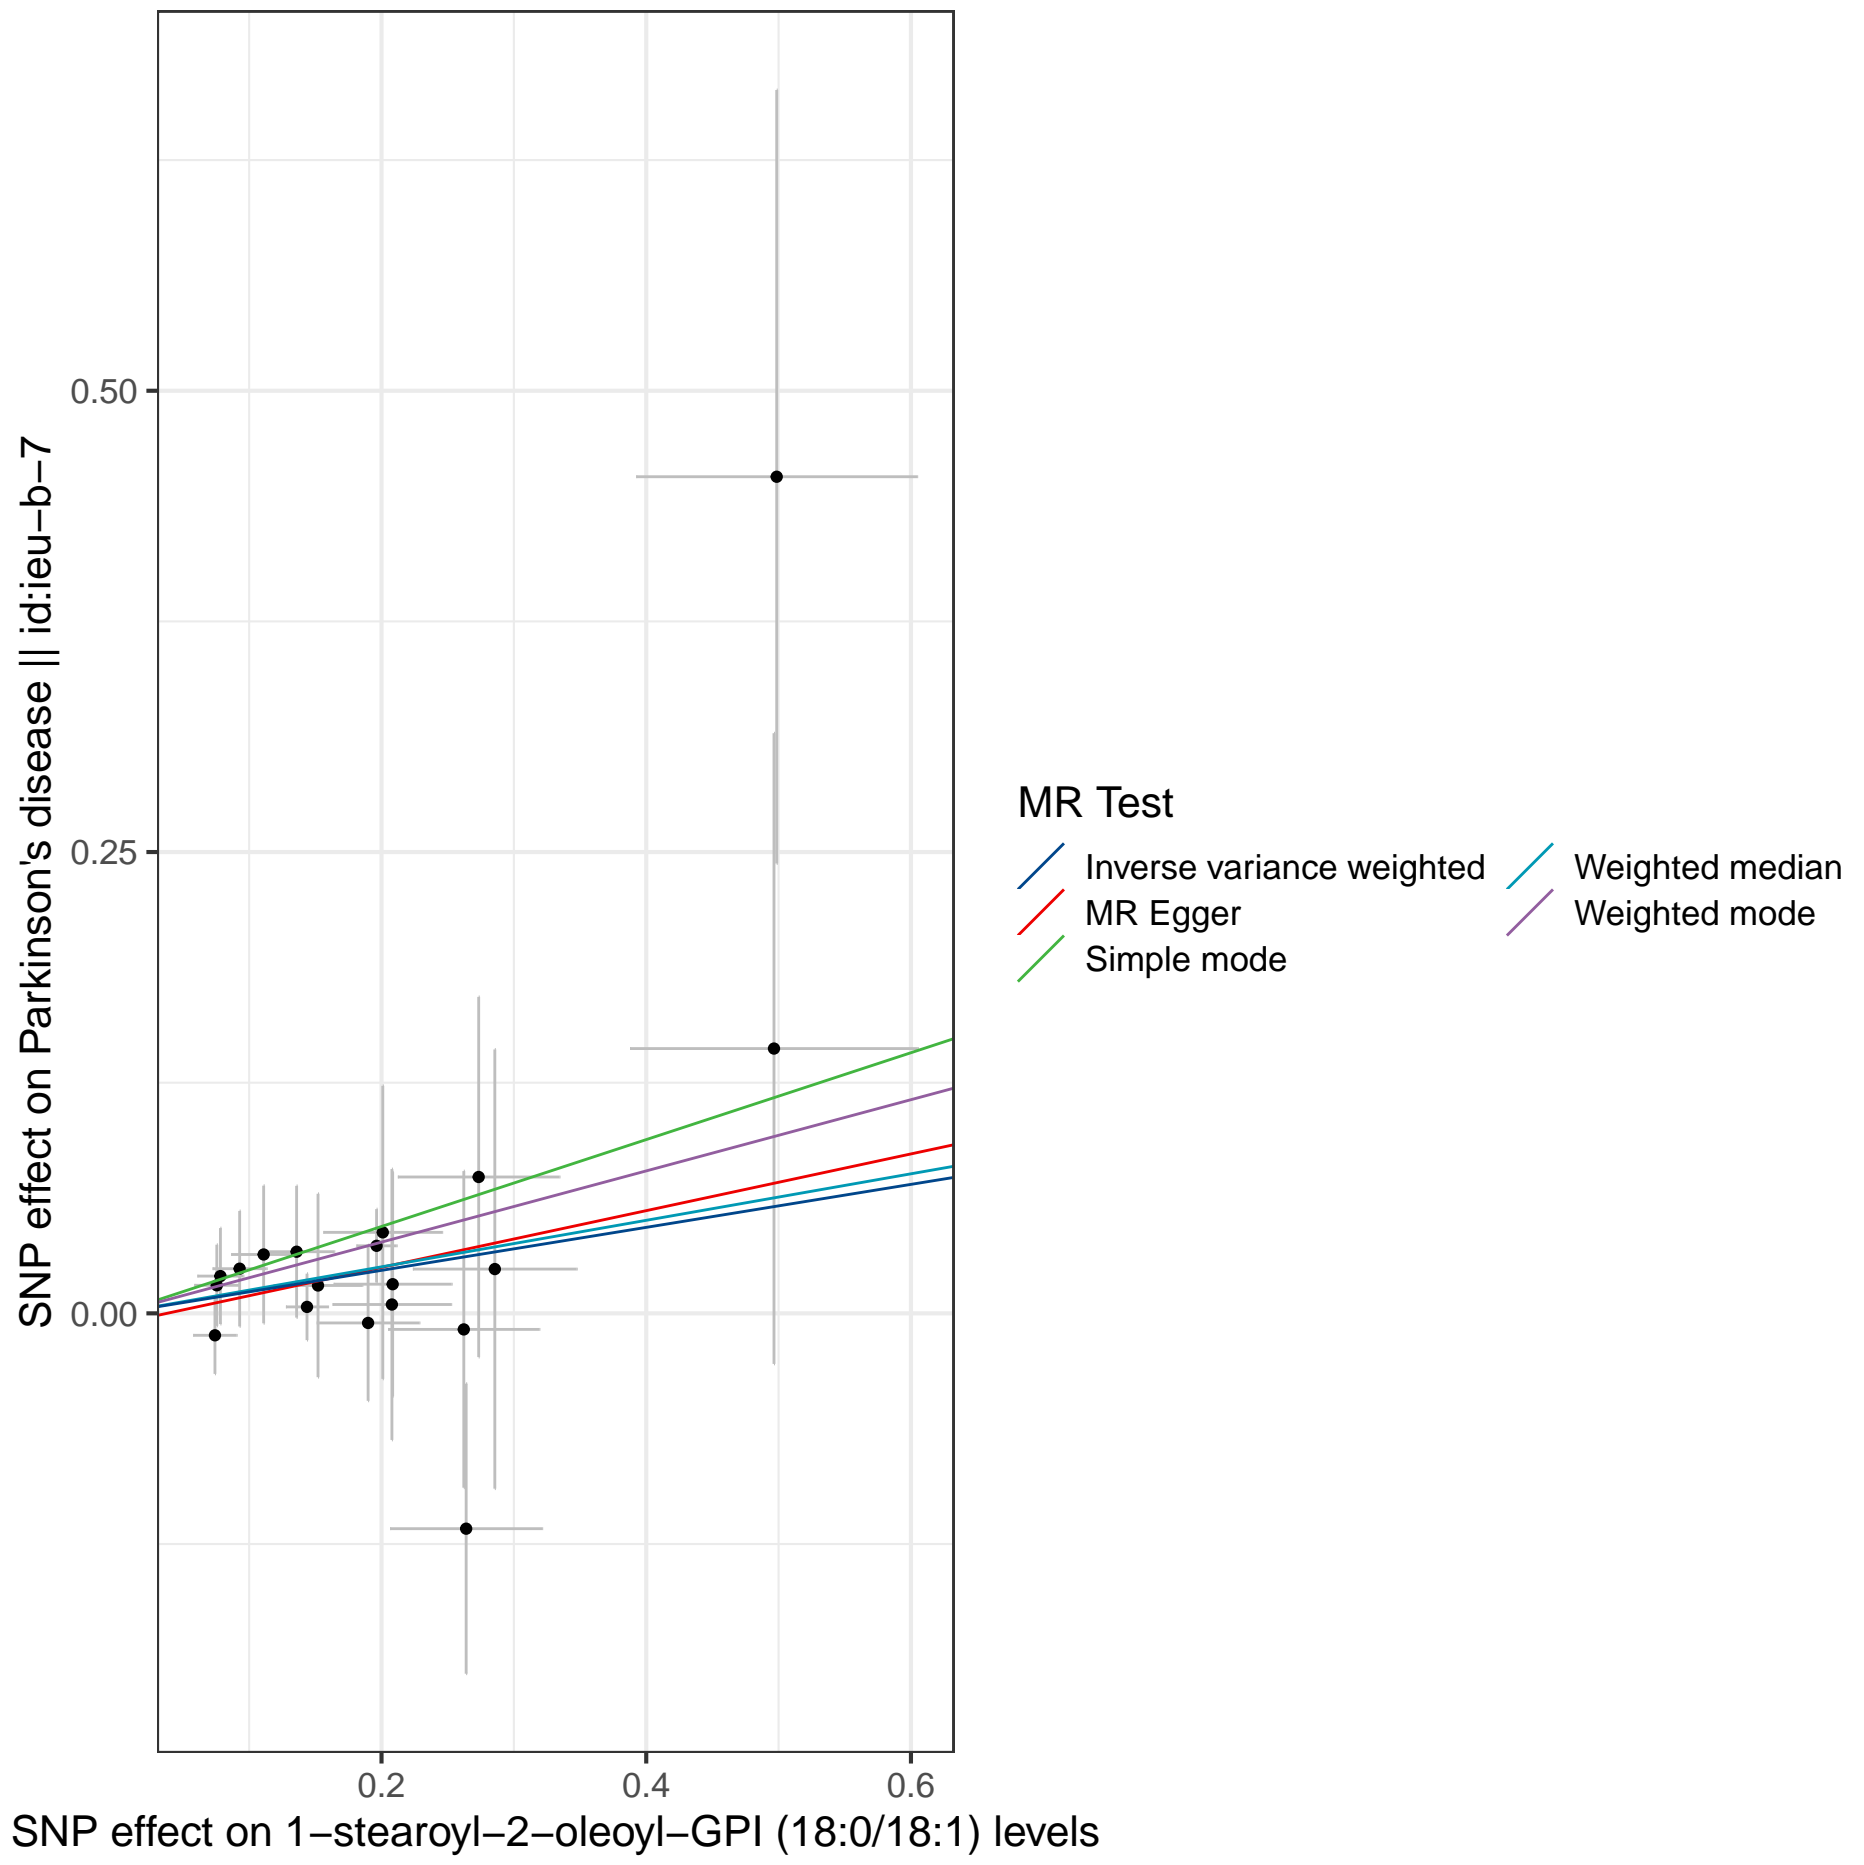

SNP effect on 1-stearoyl-2-oleoyl-GPI (18:0/18:1) levels

SNP effect on Parkinson's disease || id:ieu-b-7

MR Test

- Inverse variance weighted
- MR Egger
- Simple mode
- Weighted median
- Weighted mode

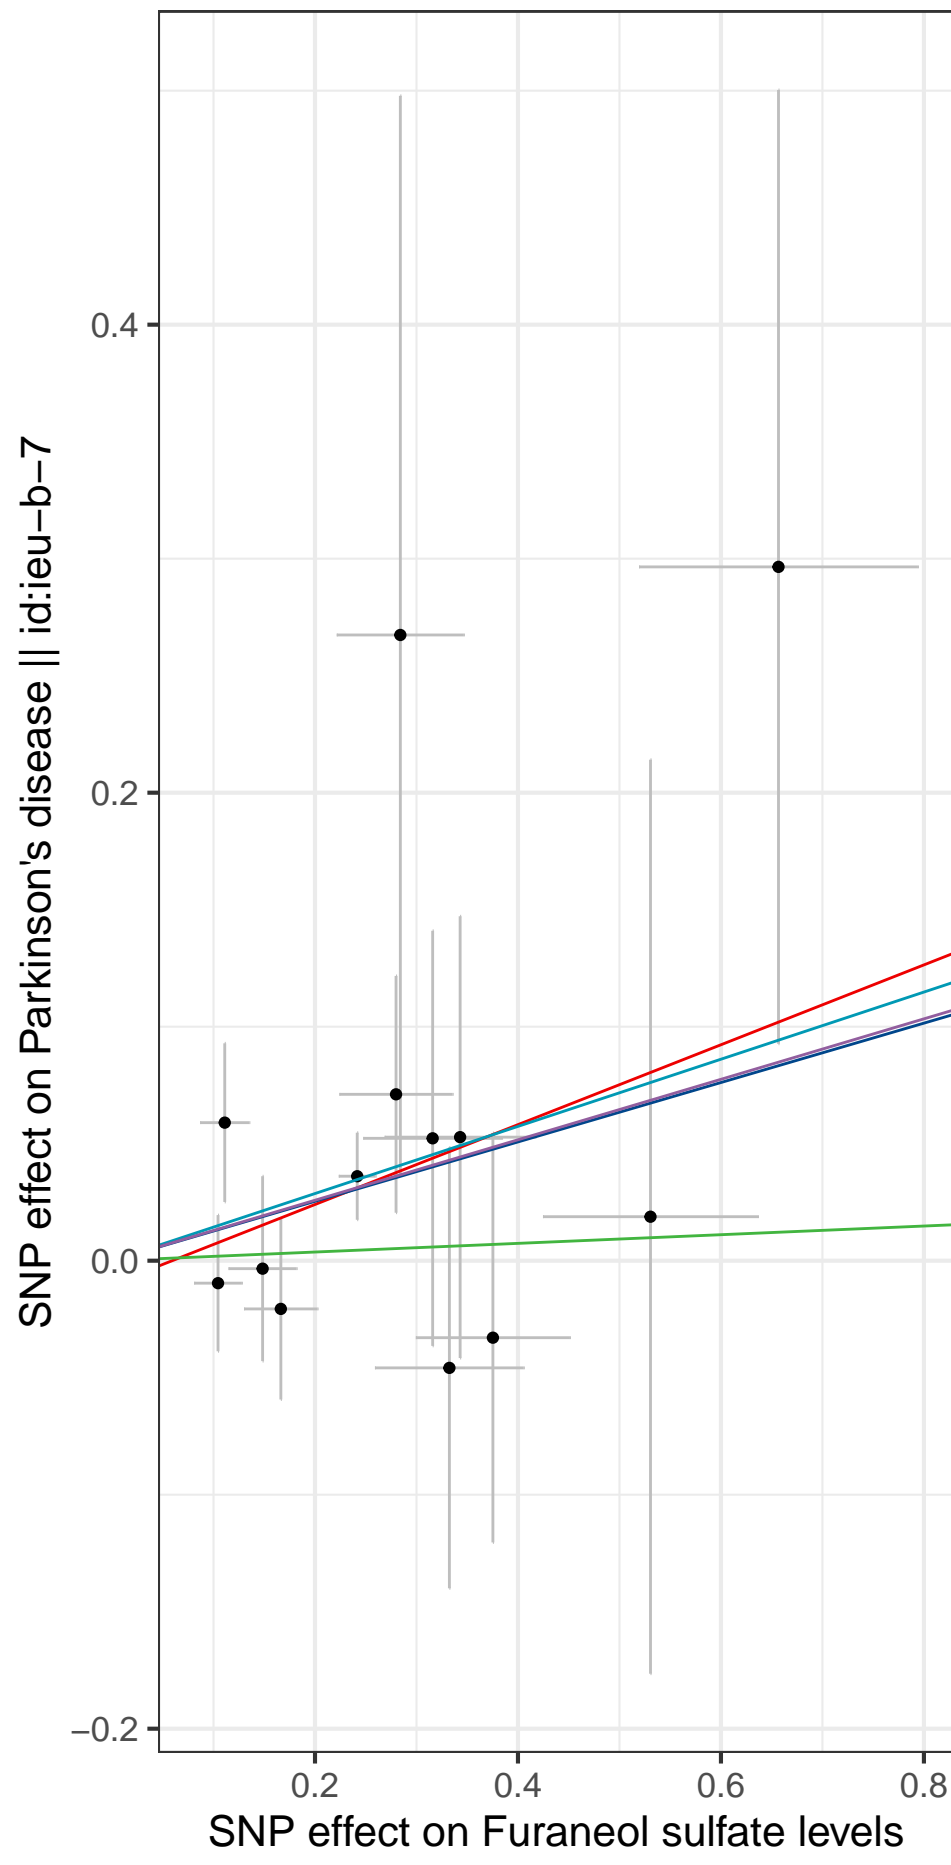

- MR Test
- Inverse variance weighted
  - MR Egger
  - Simple mode
  - Weighted median
  - Weighted mode

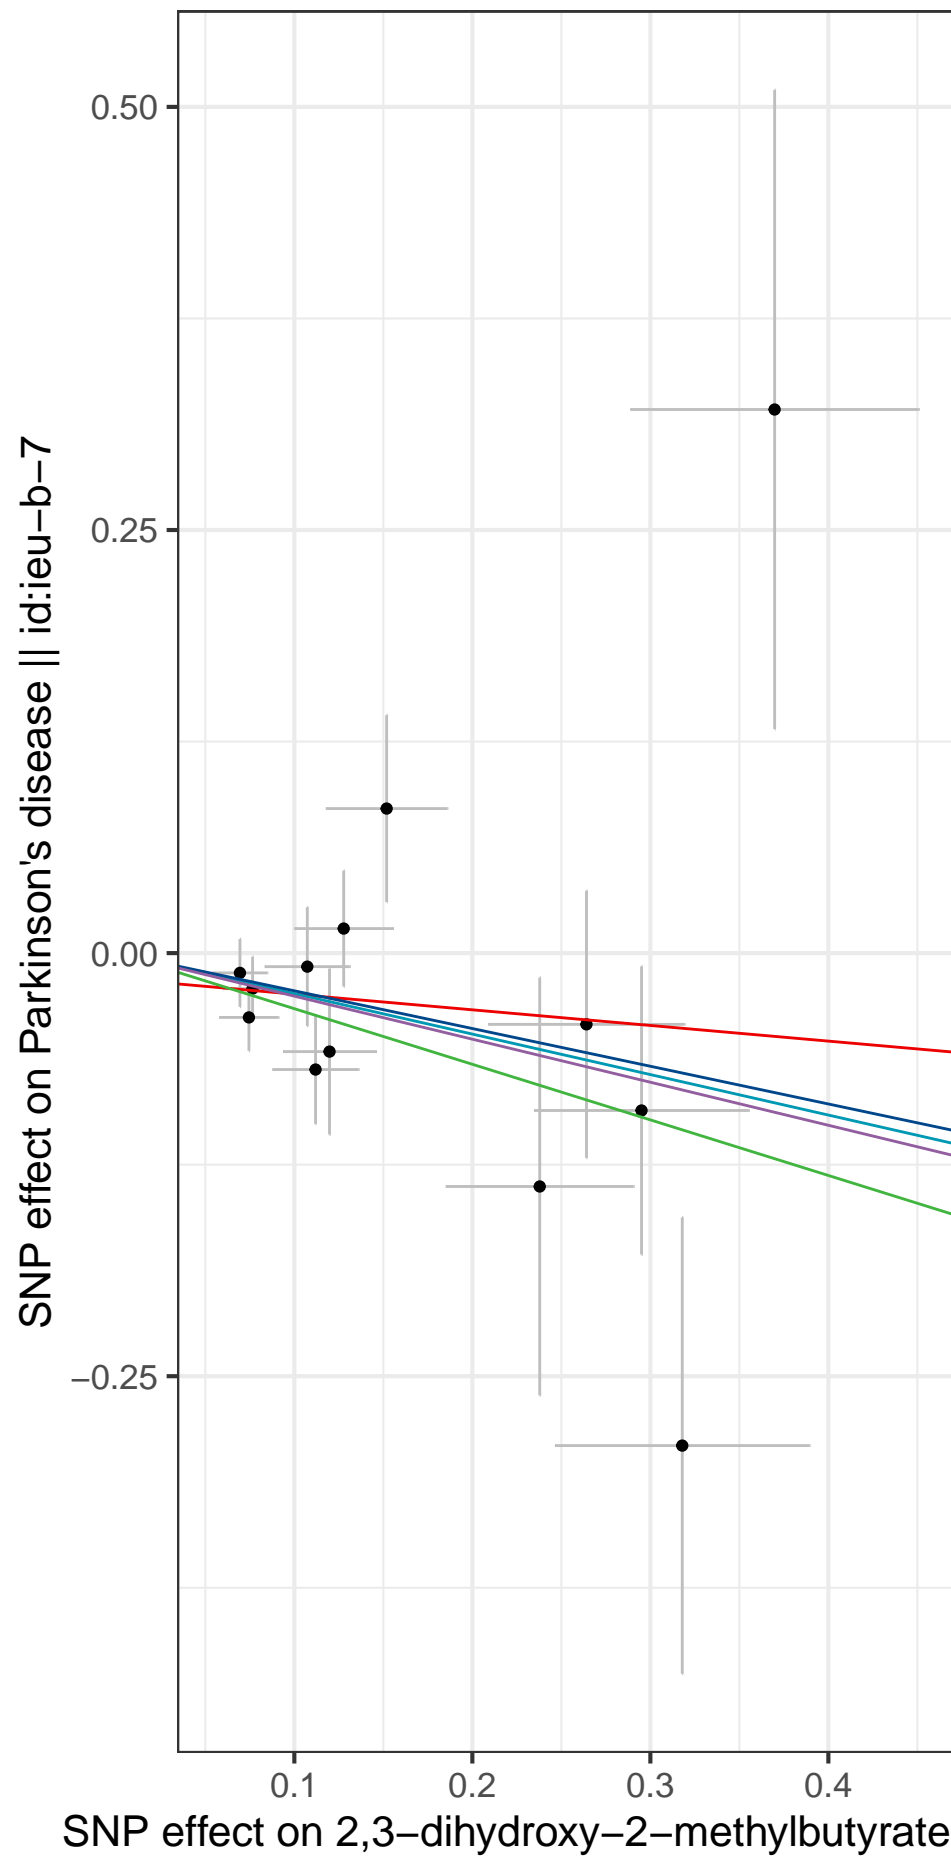

- MR Test
- Inverse variance weighted
  - MR Egger
  - Simple mode
  - Weighted median
  - Weighted mode

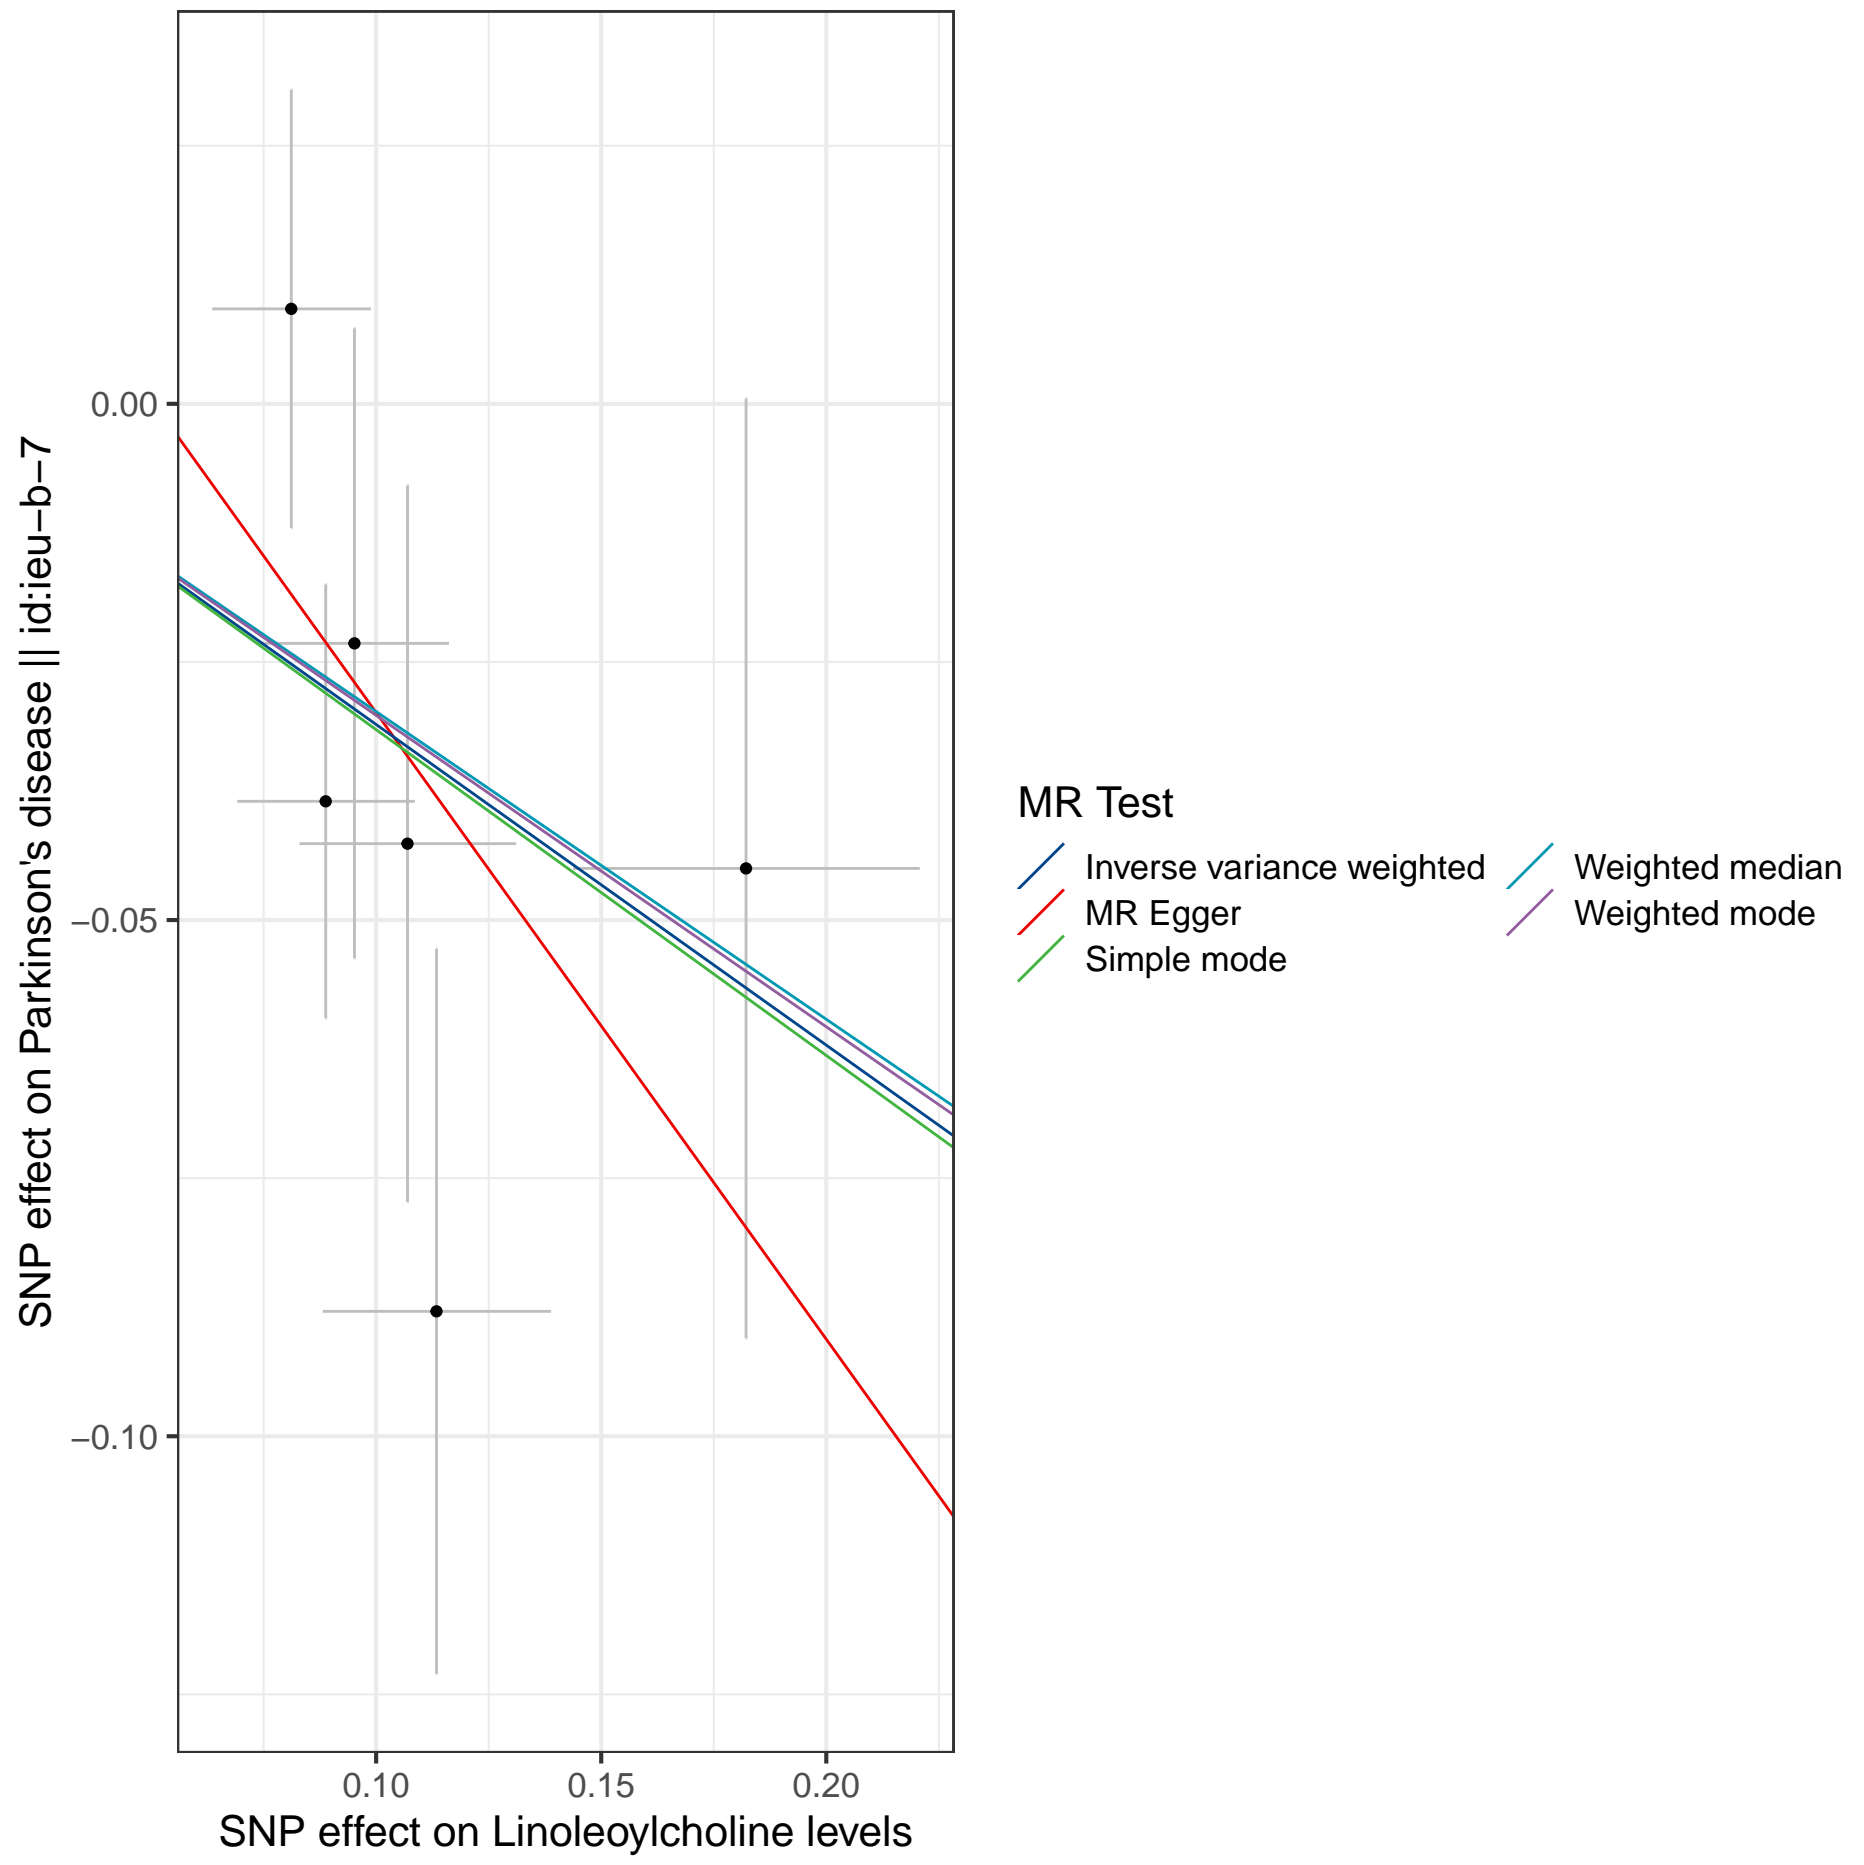

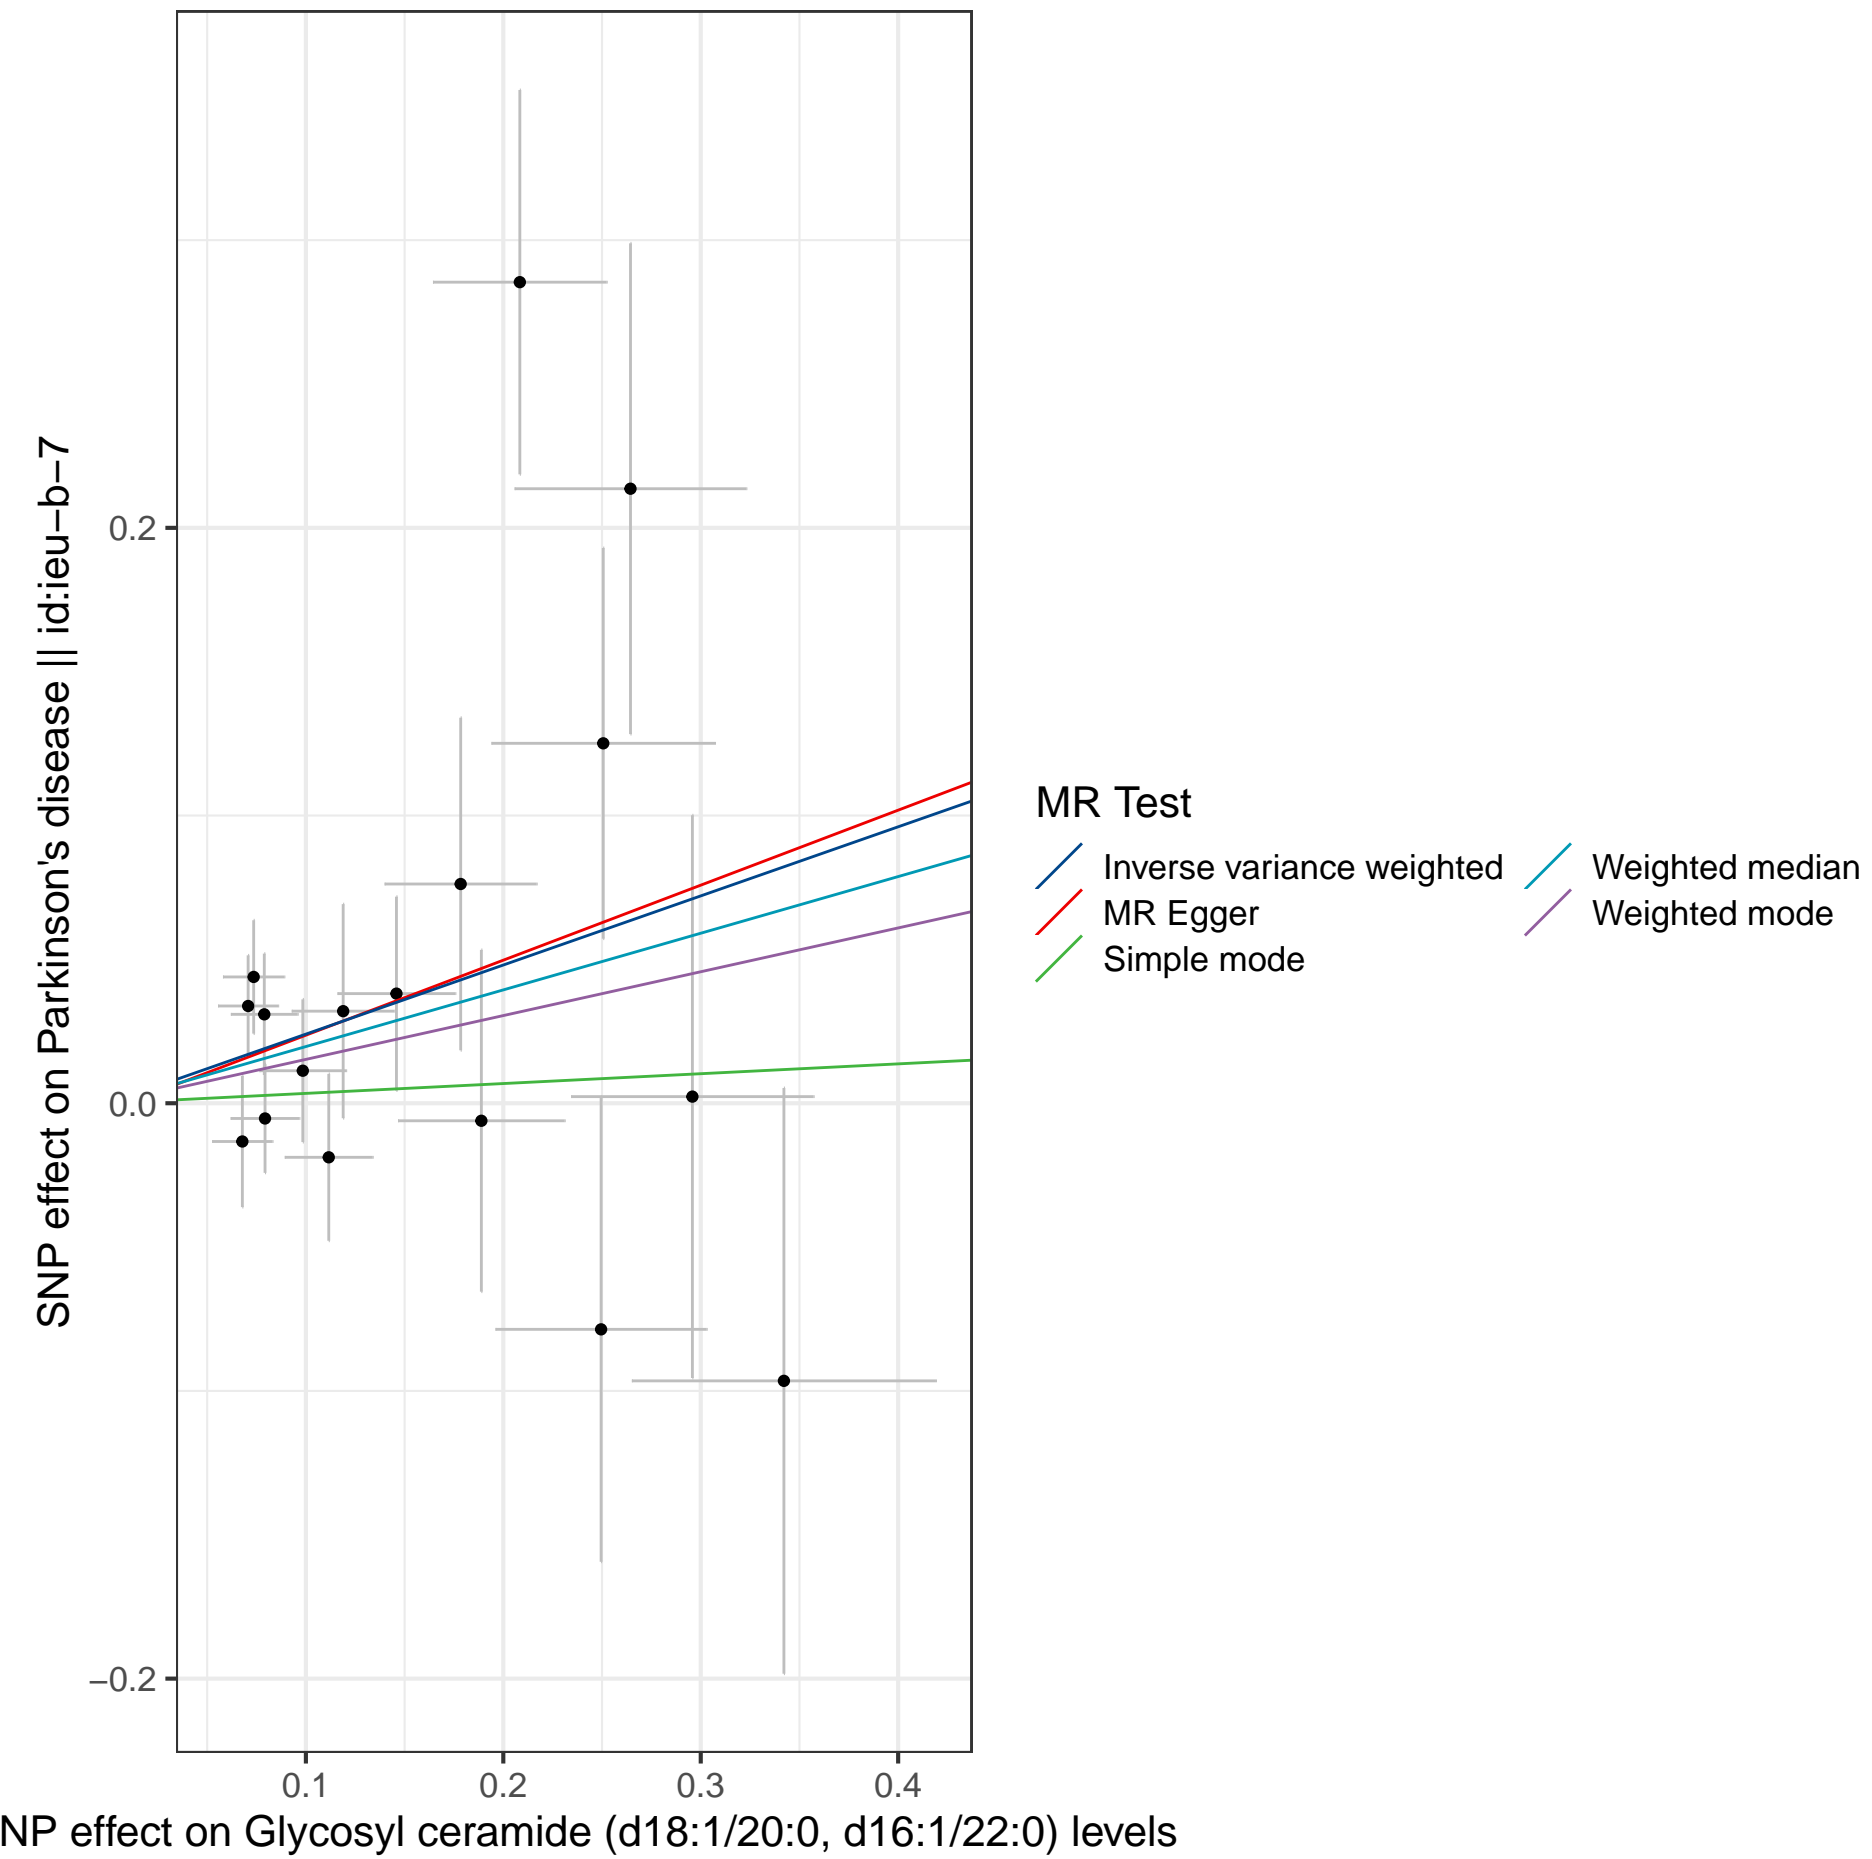

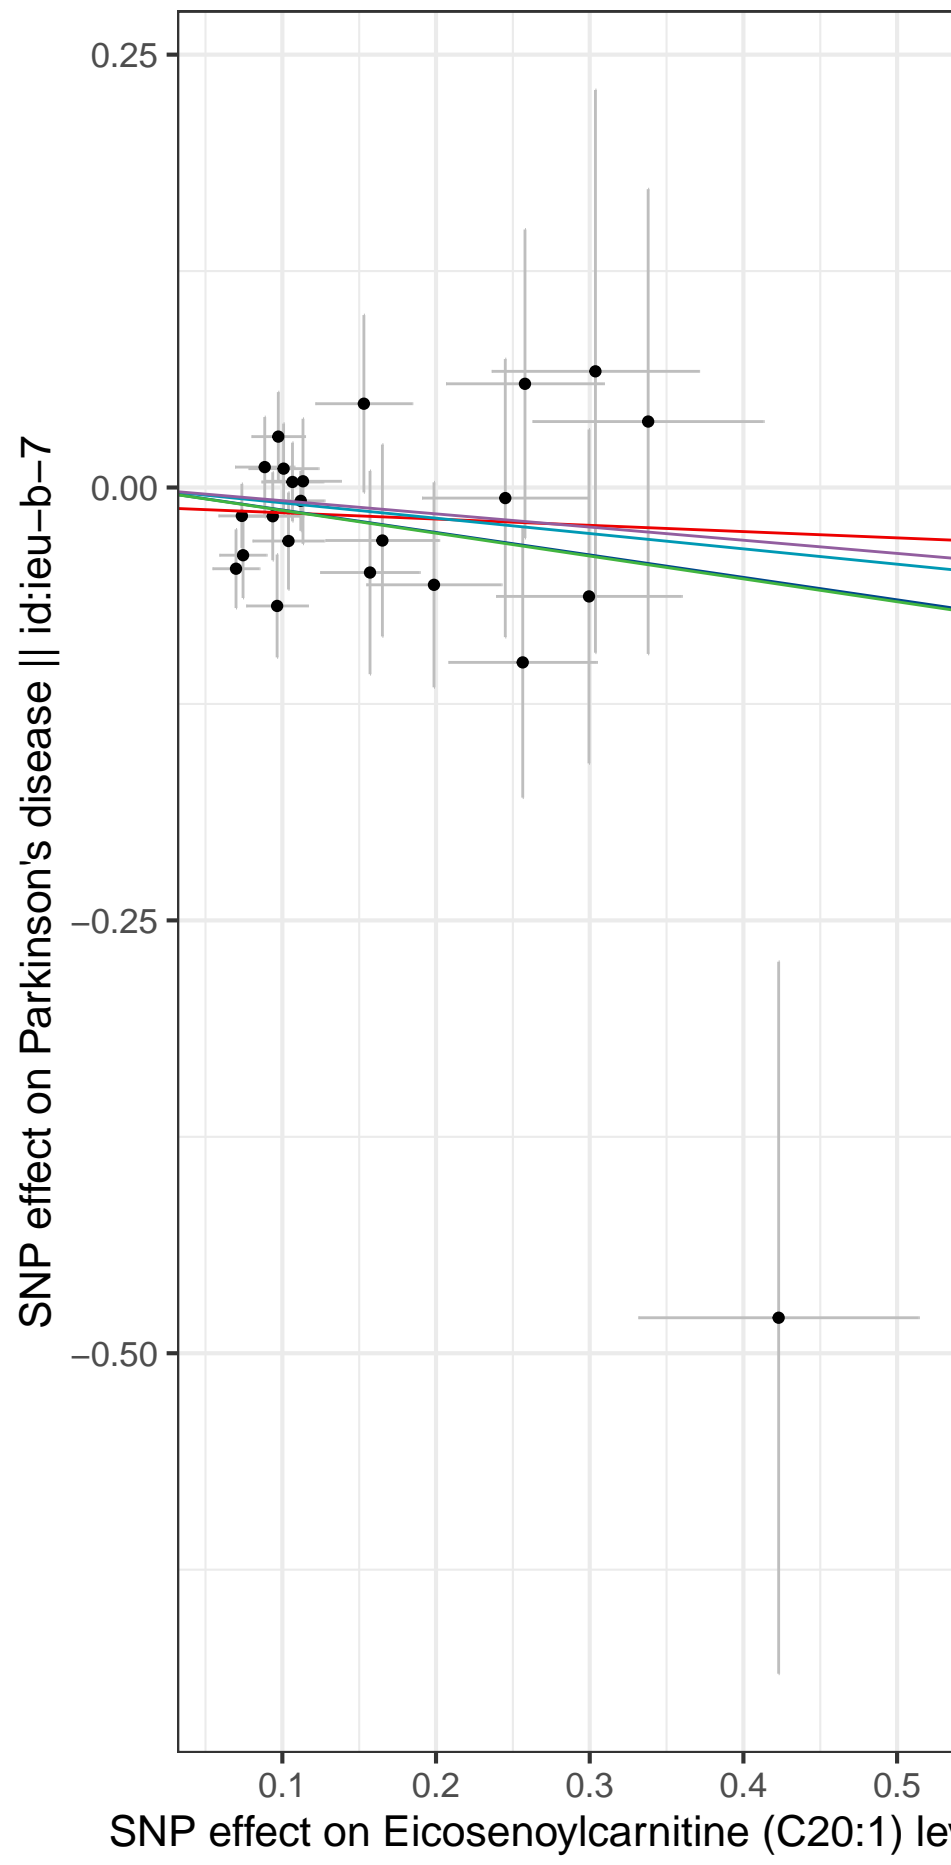

MR Test

- Inverse variance weighted
- MR Egger
- Simple mode
- Weighted median
- Weighted mode

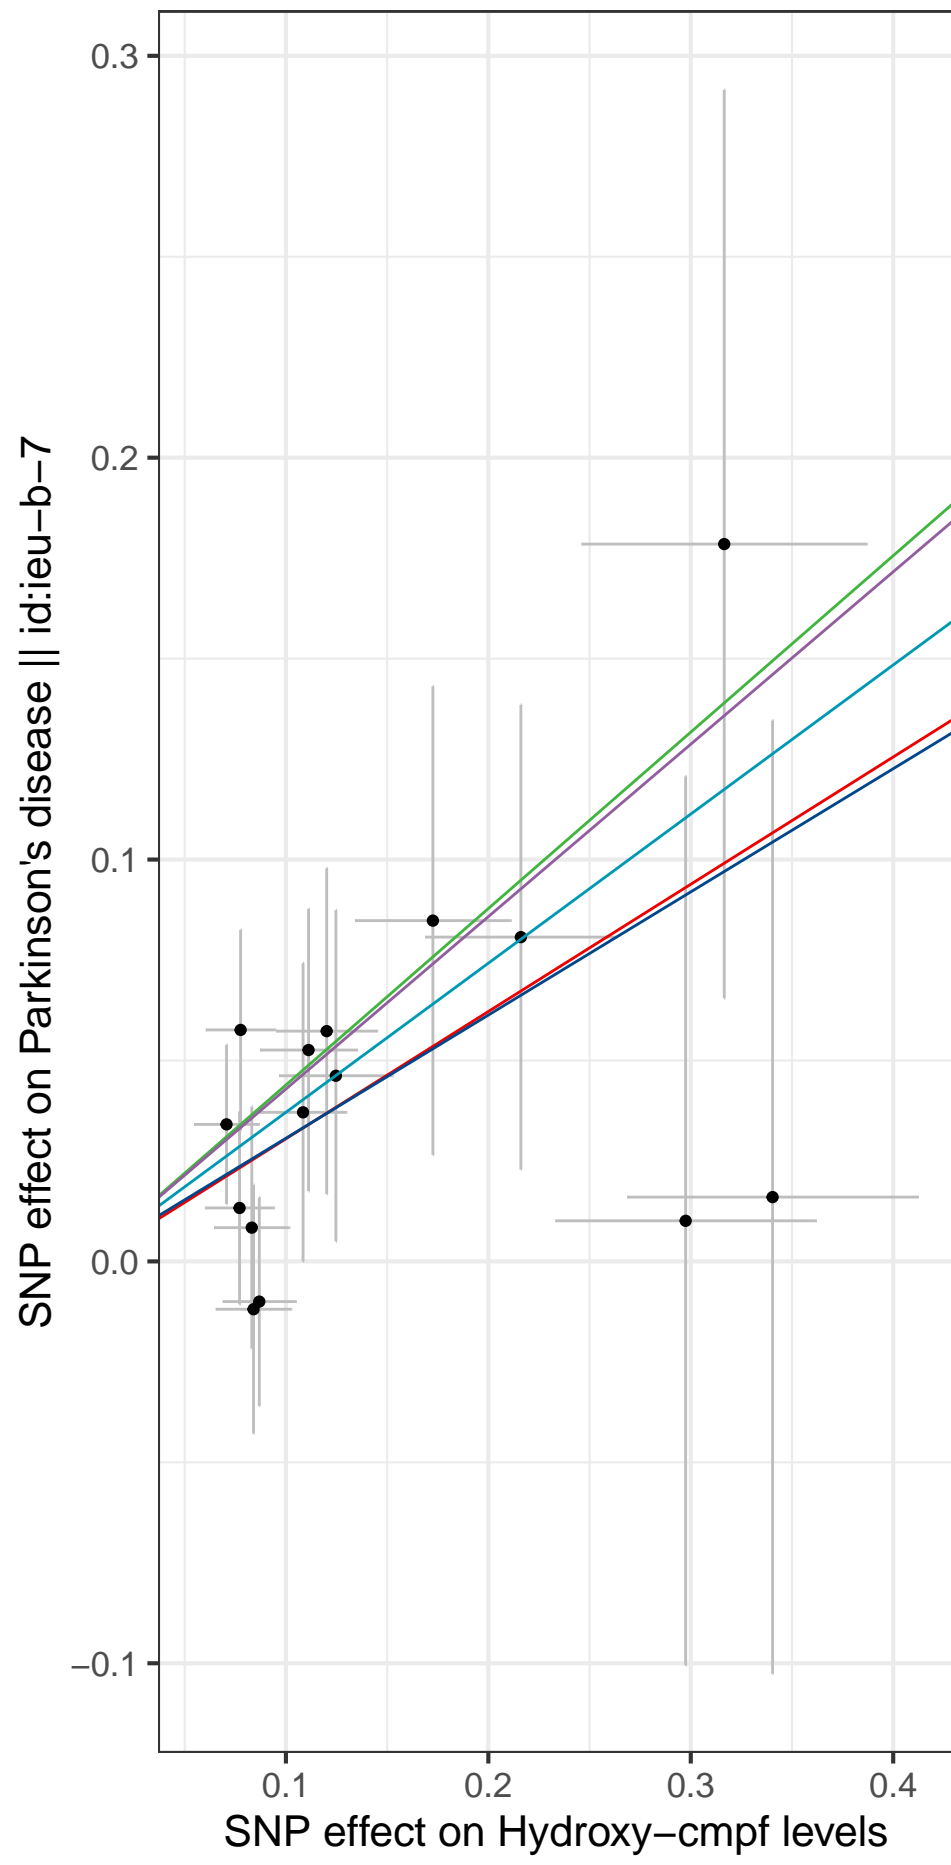

- MR Test
- Inverse variance weighted
  - MR Egger
  - Simple mode
  - Weighted median
  - Weighted mode



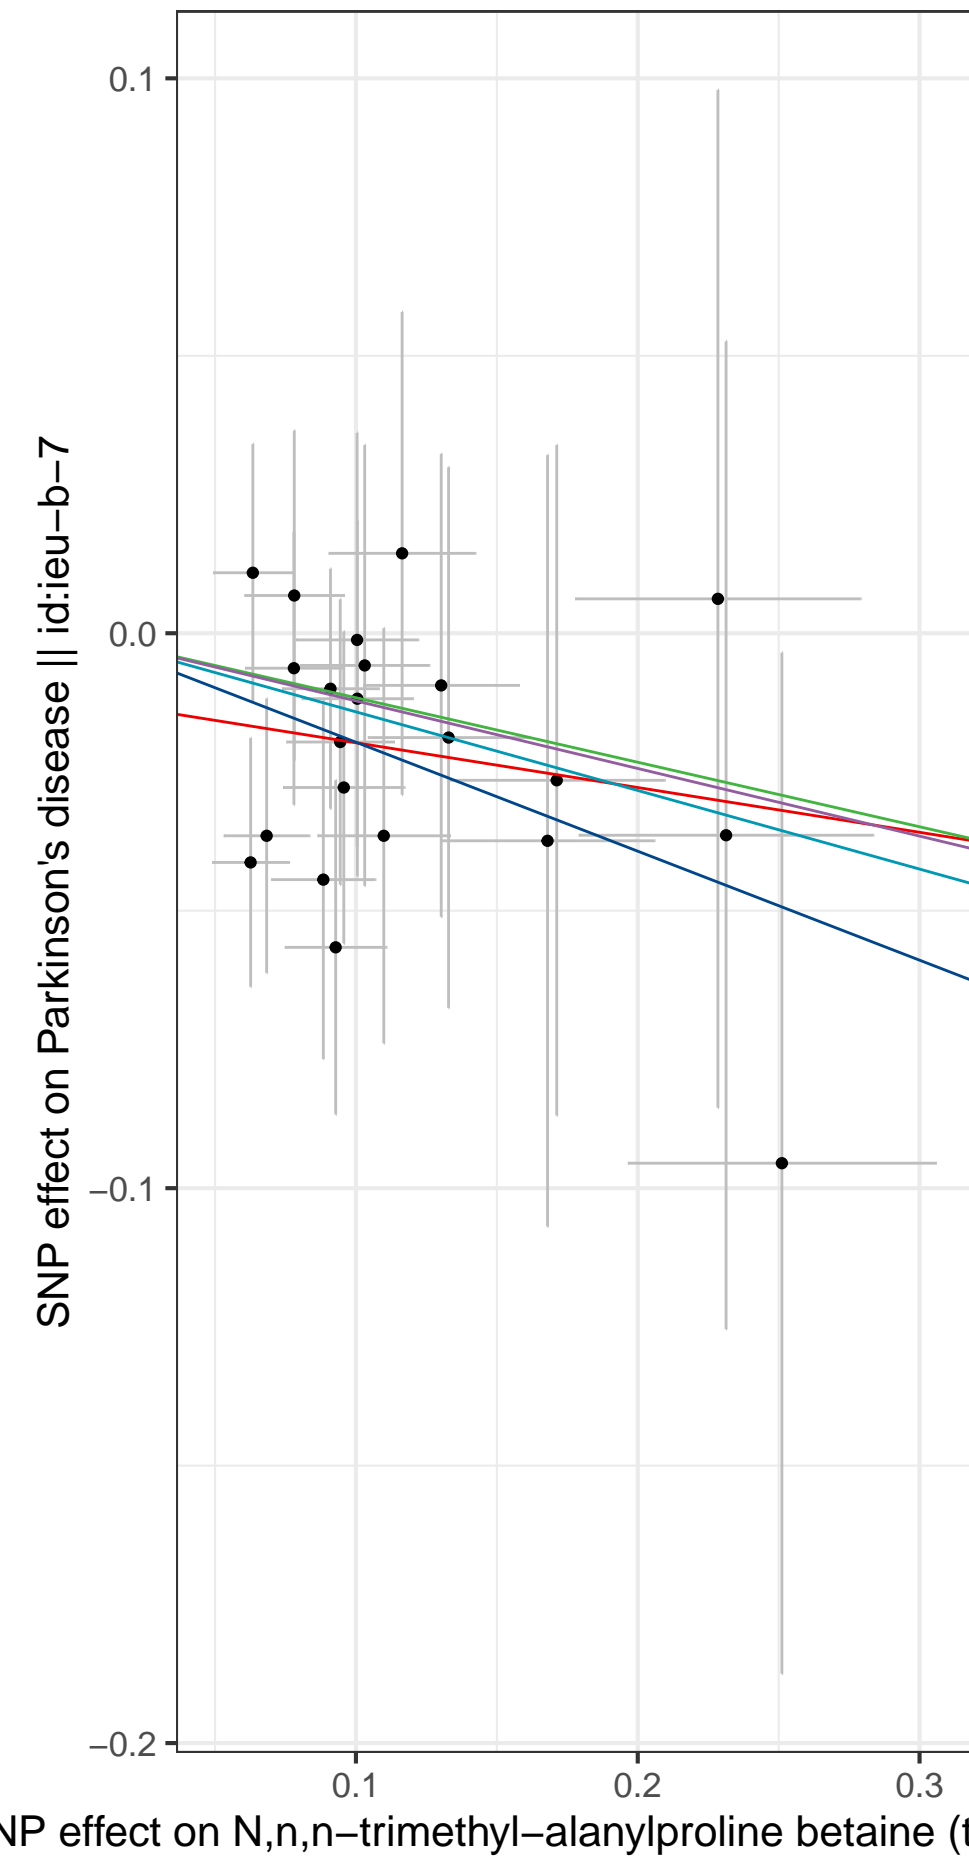

MR Test

- Inverse variance weighted
- MR Egger
- Simple mode
- Weighted median
- Weighted mode

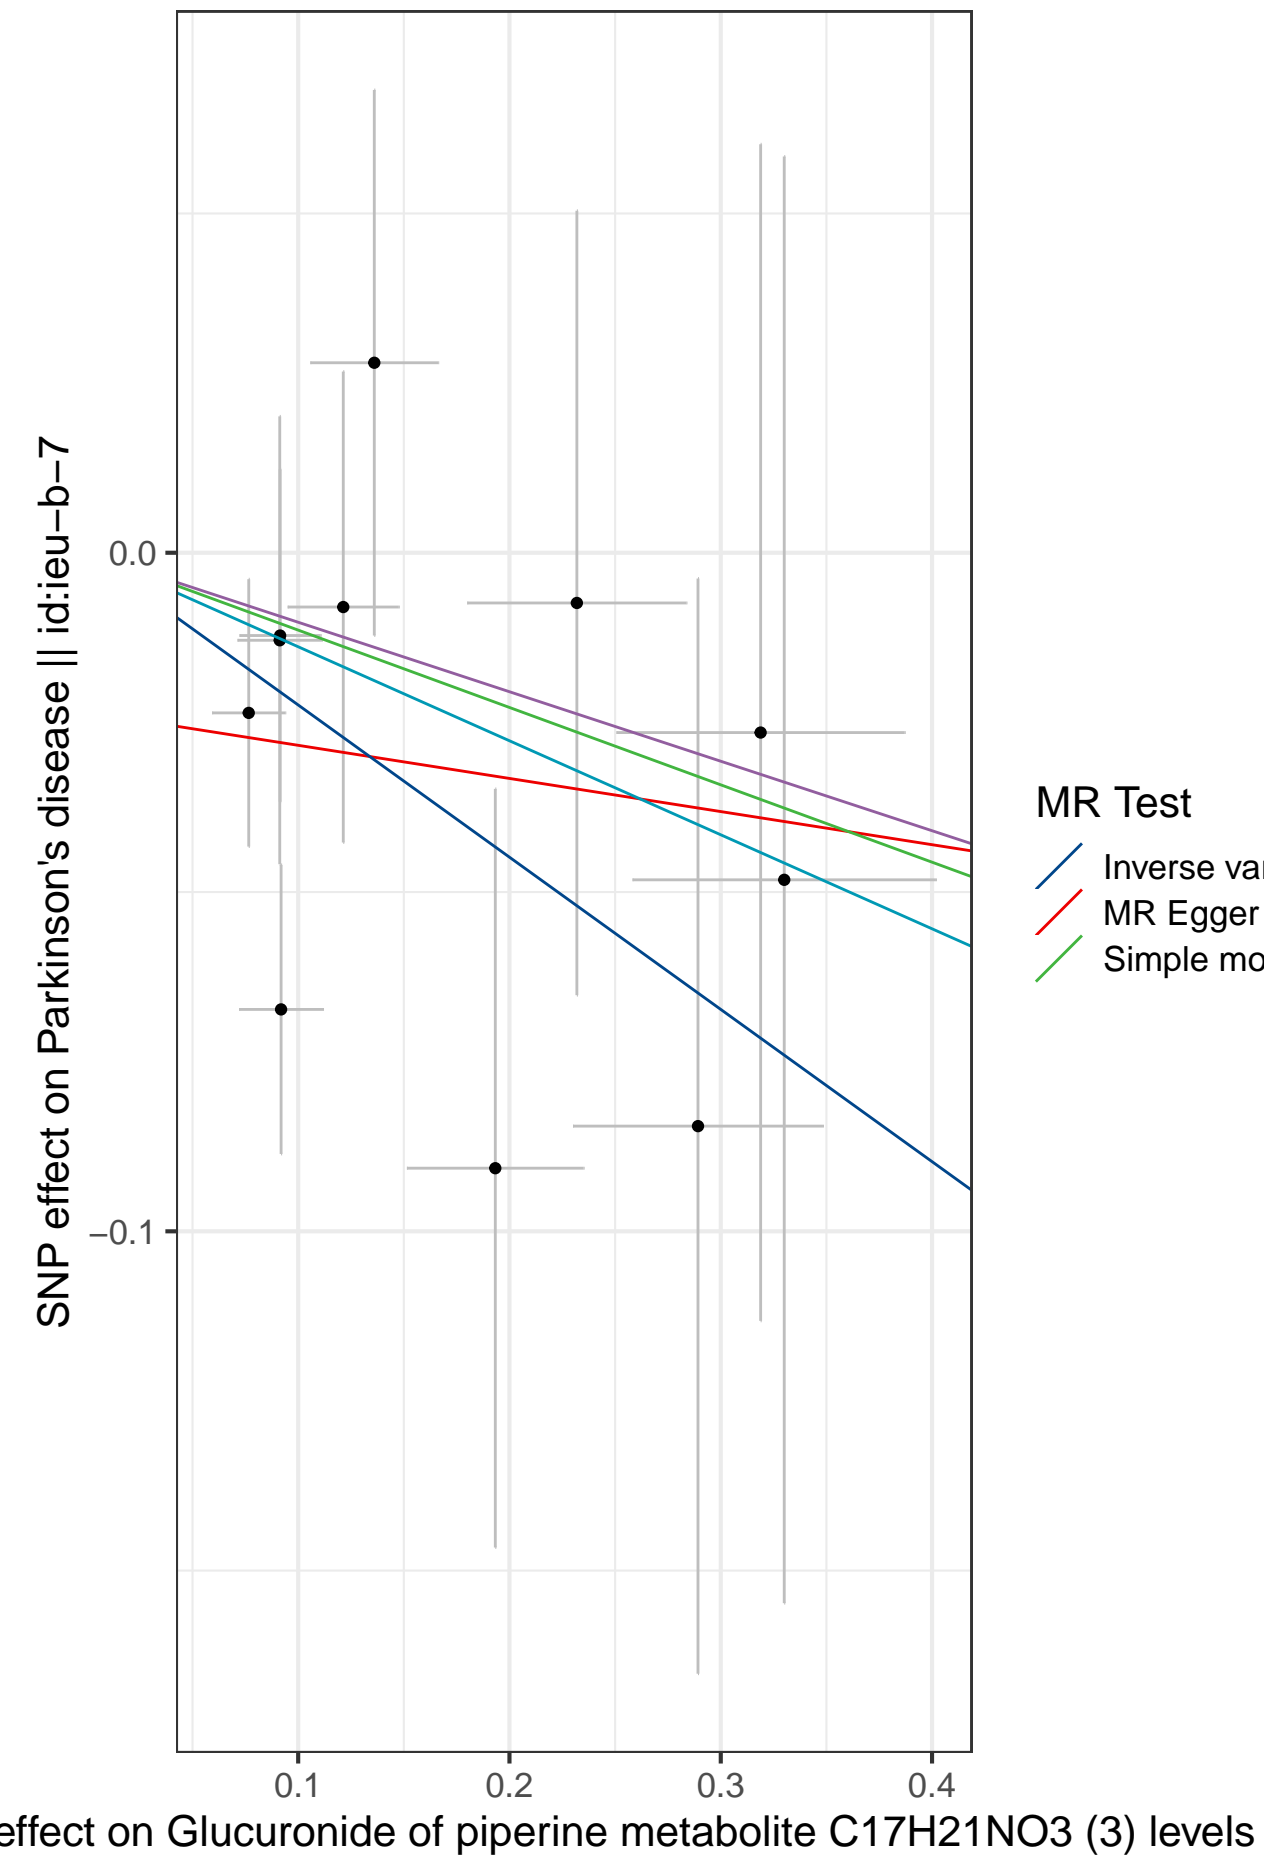

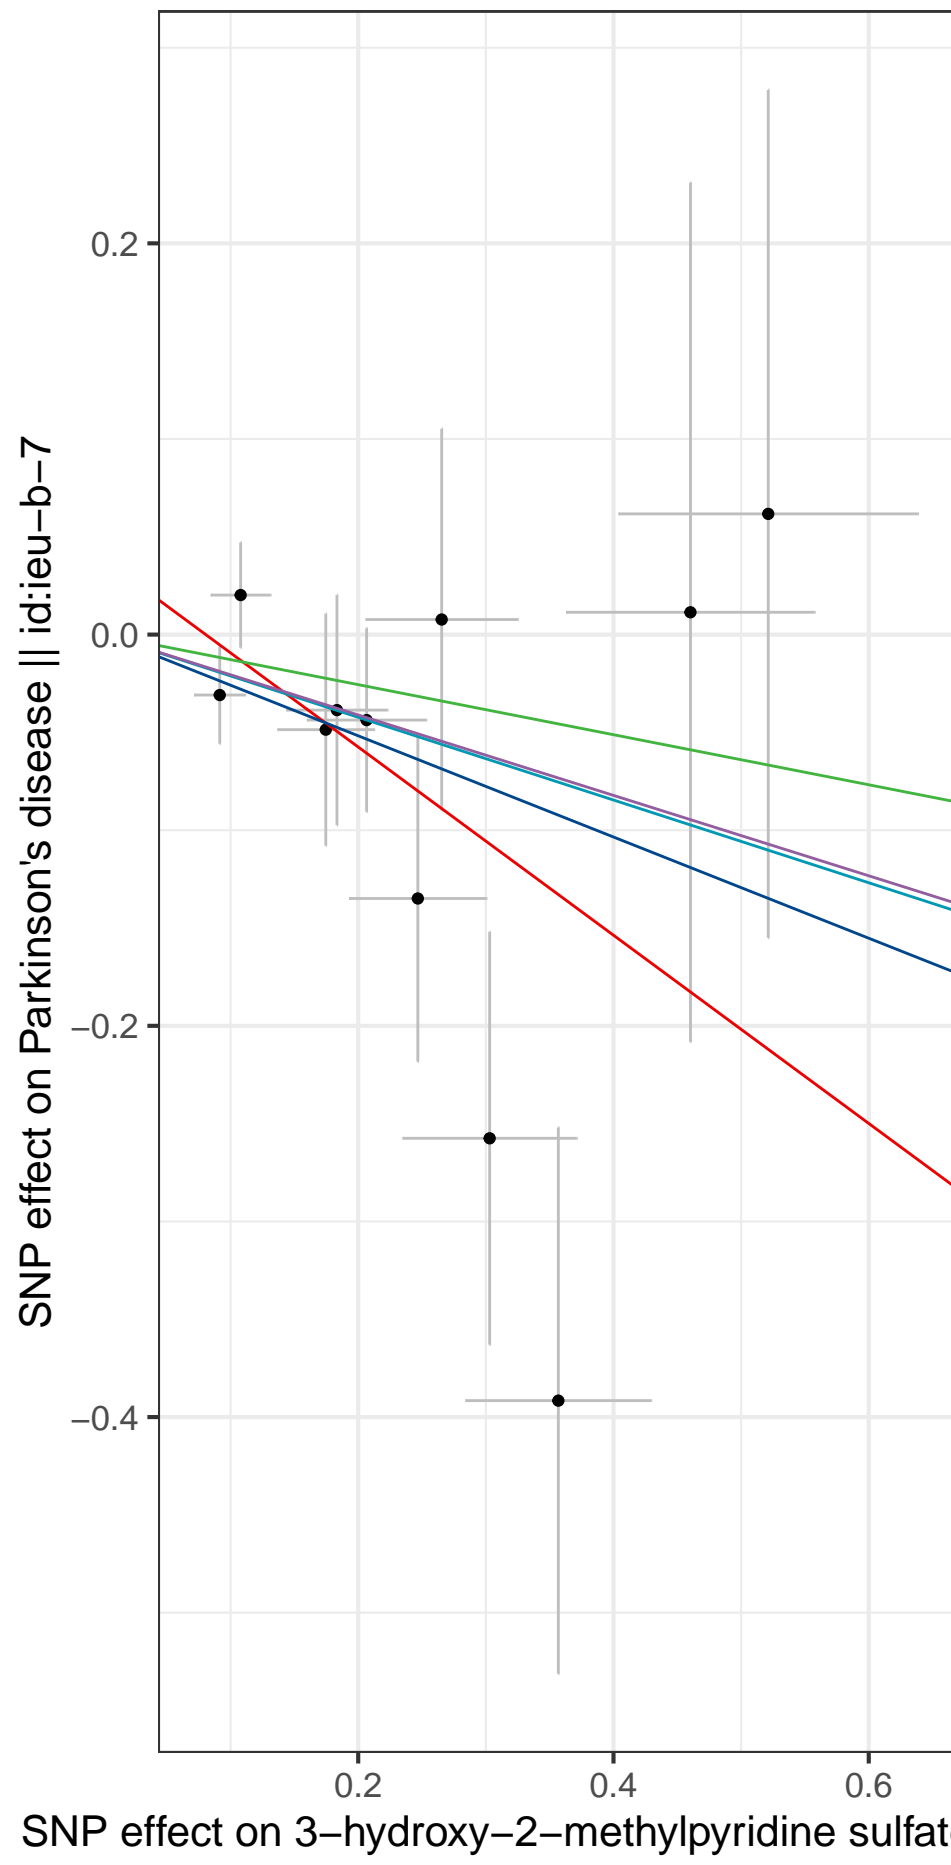

- MR Test
- Inverse variance weighted
  - MR Egger
  - Simple mode
  - Weighted median
  - Weighted mode

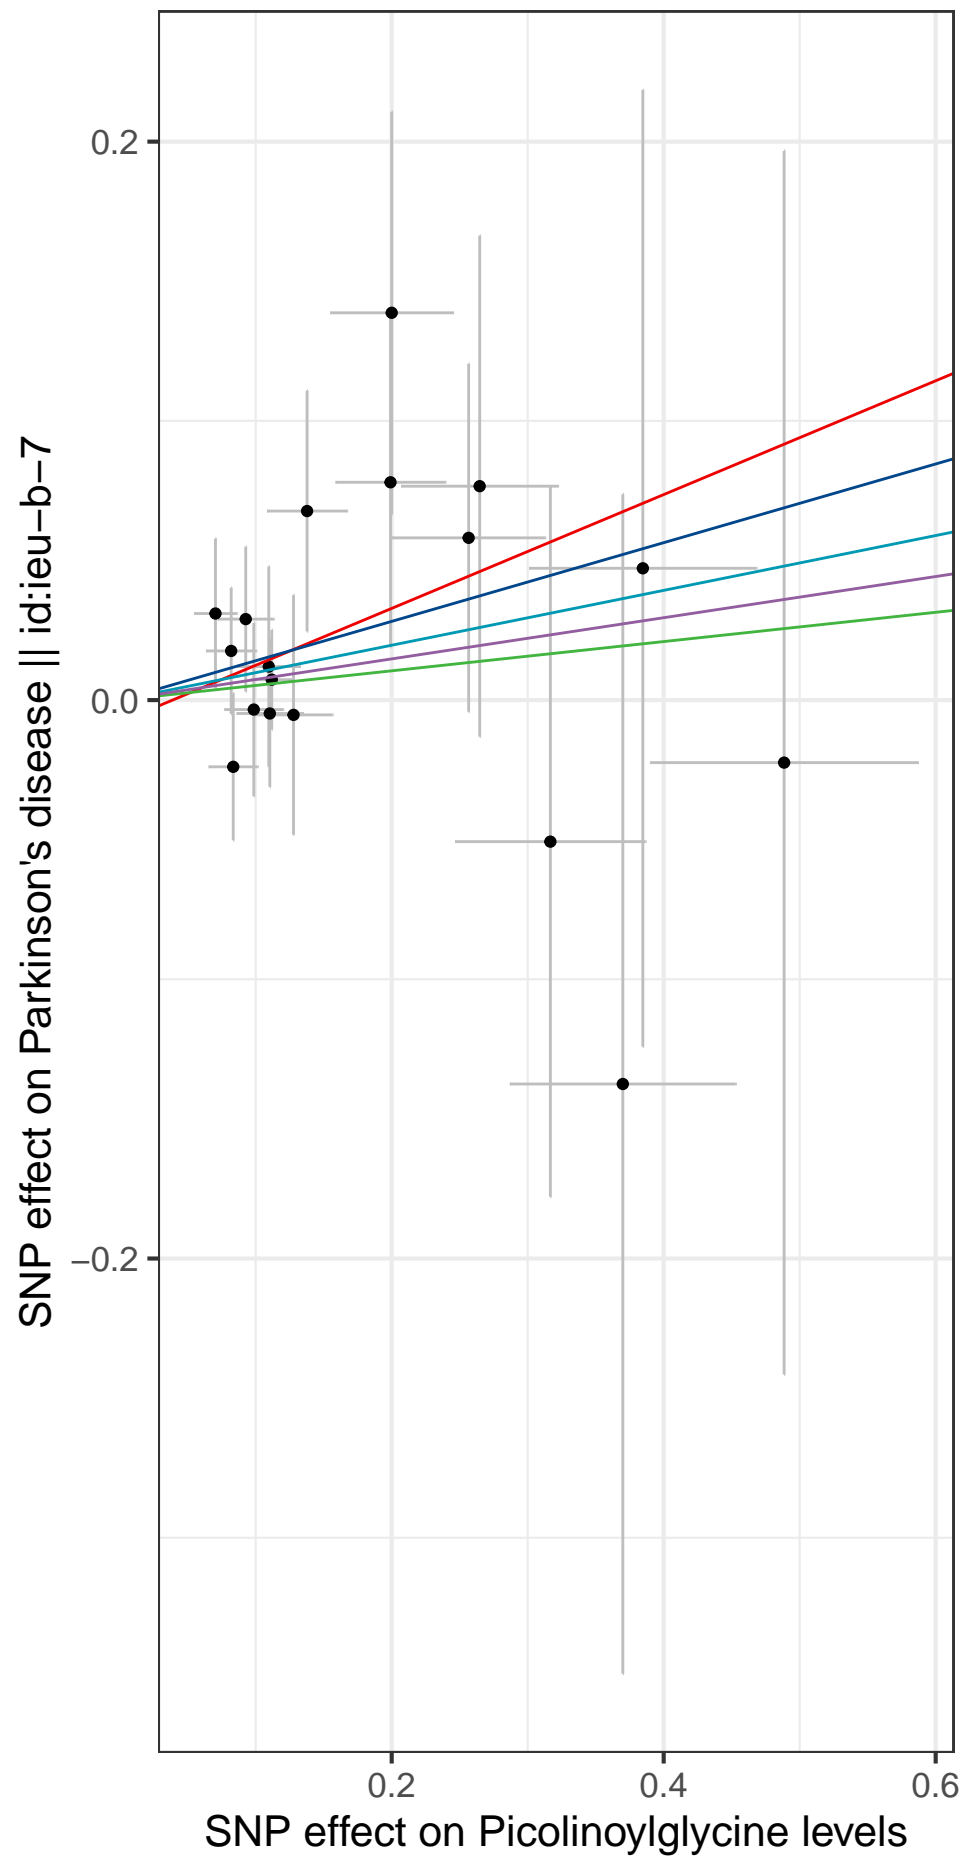

MR Test

- Inverse variance weighted
- MR Egger
- Simple mode
- Weighted median
- Weighted mode

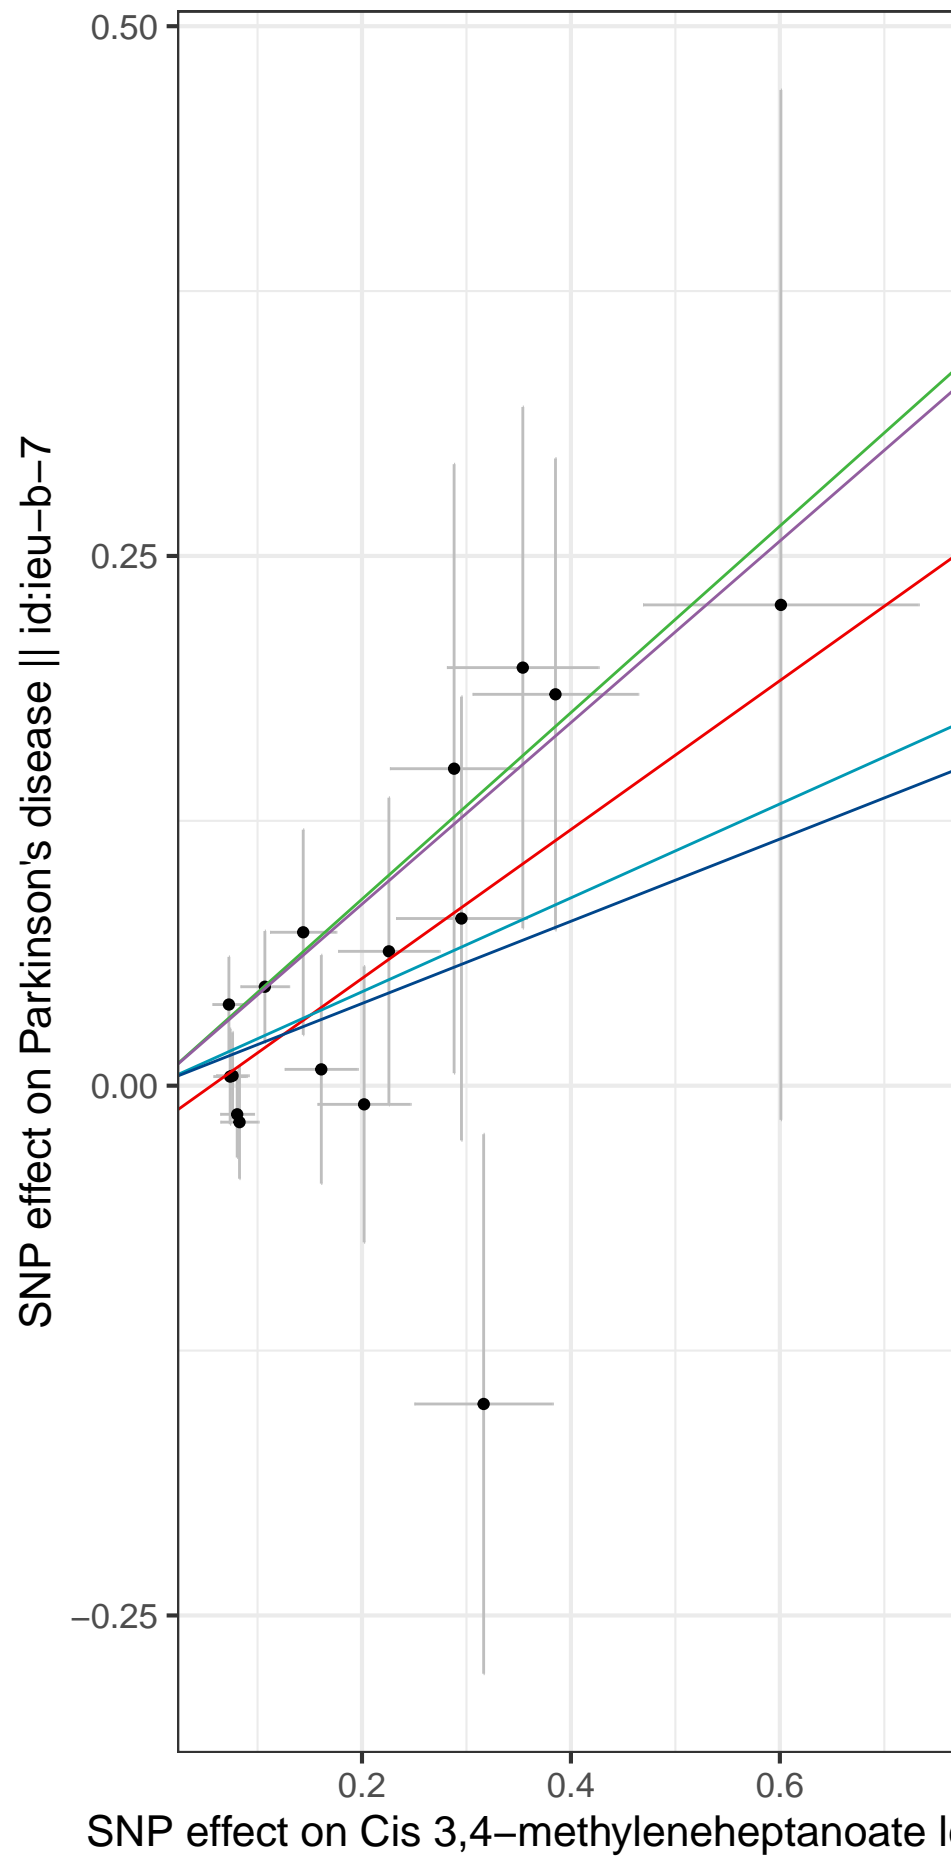

MR Test

- Inverse variance weighted
- MR Egger
- Simple mode
- Weighted median
- Weighted mode

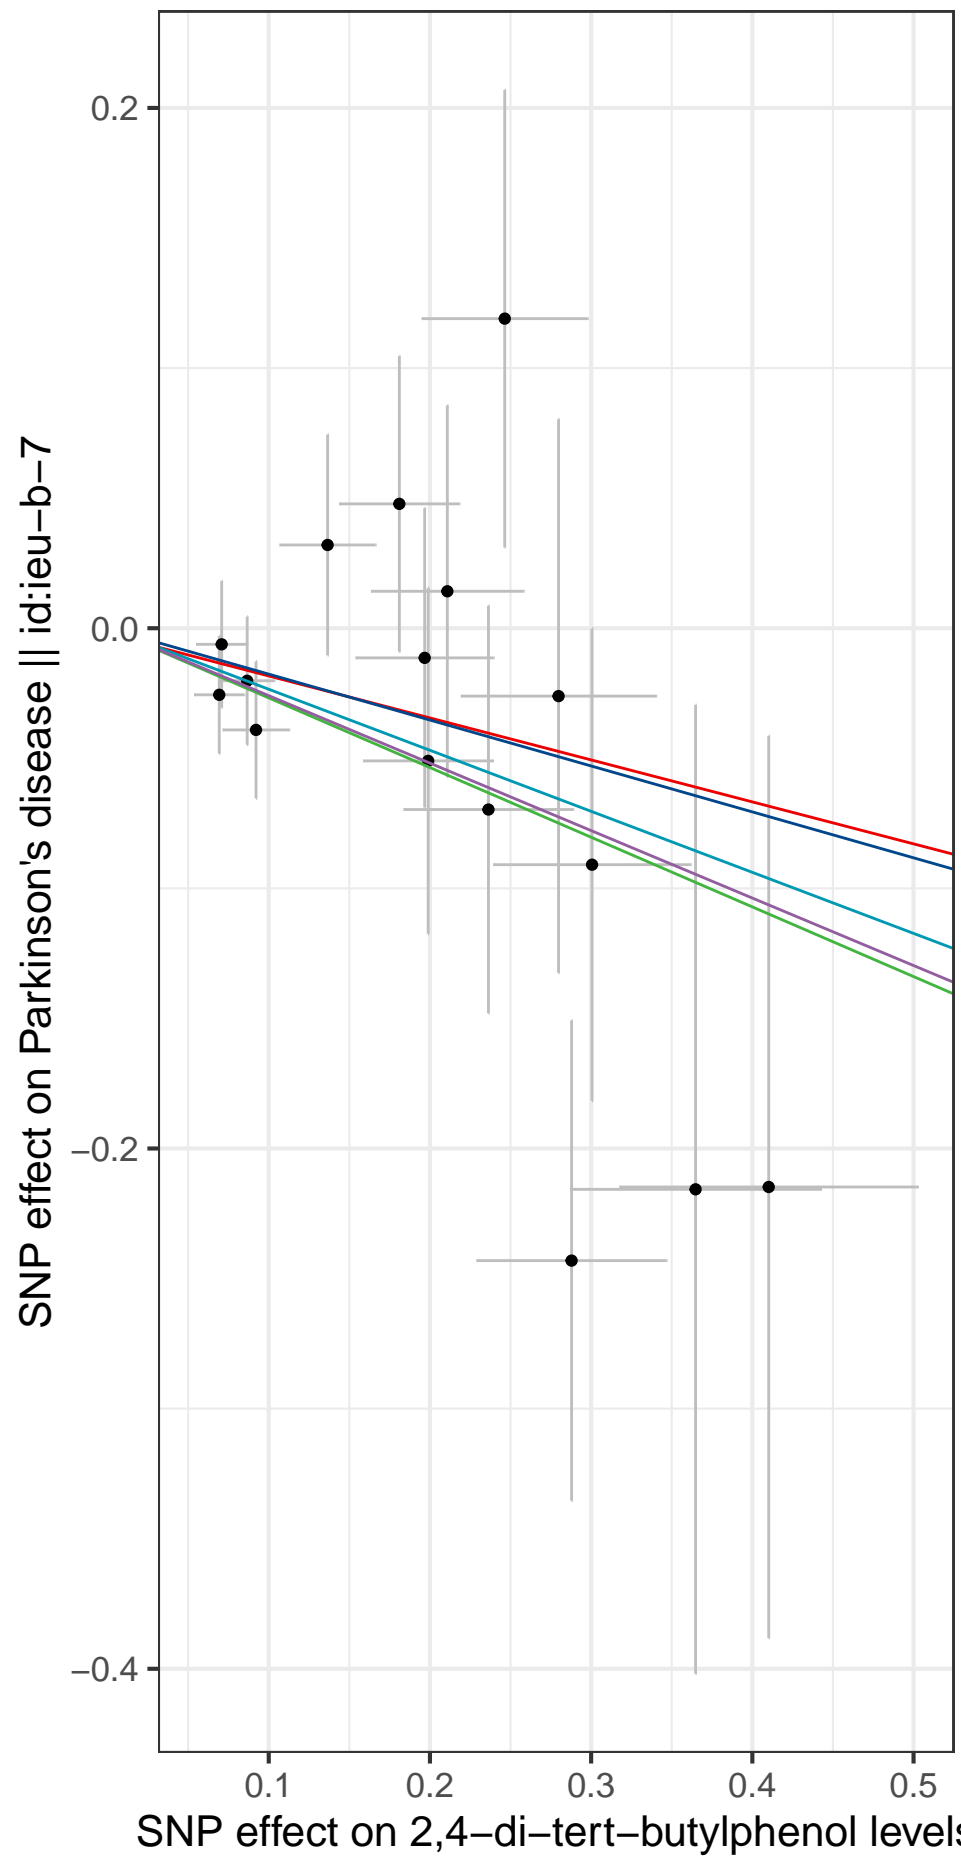

- MR Test
- Inverse variance weighted
  - MR Egger
  - Simple mode
  - Weighted median
  - Weighted mode

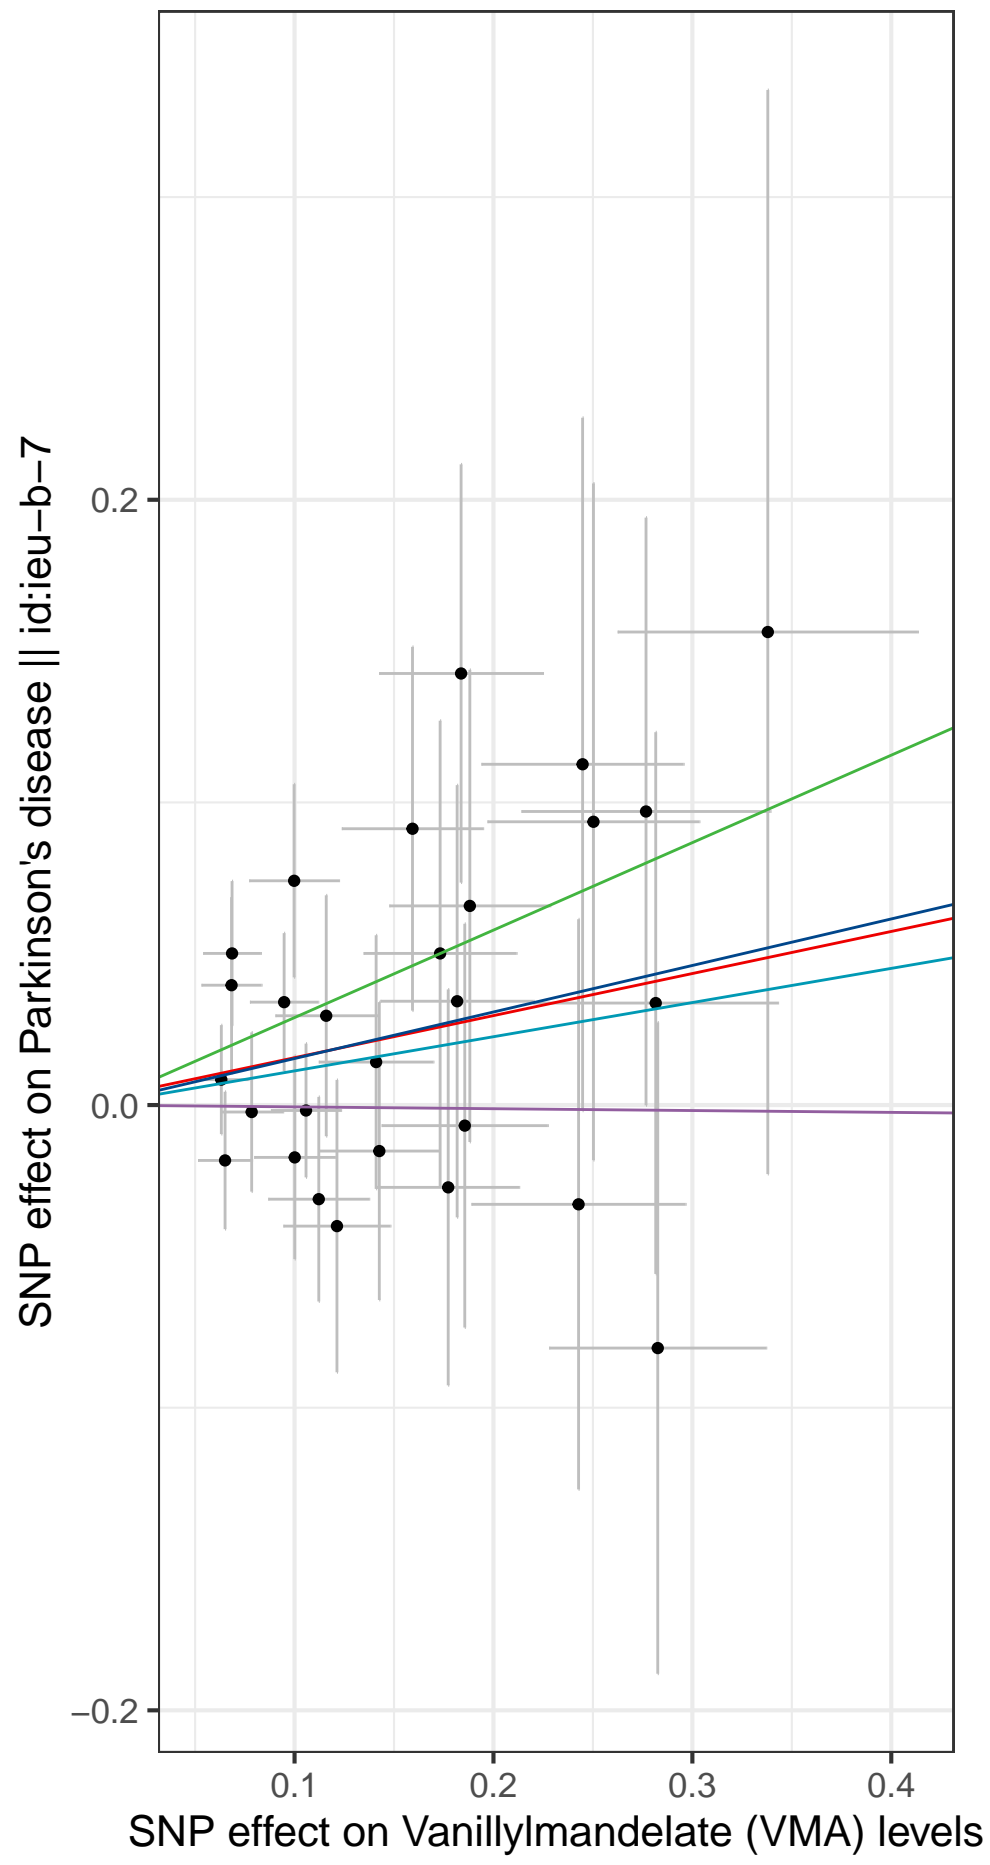

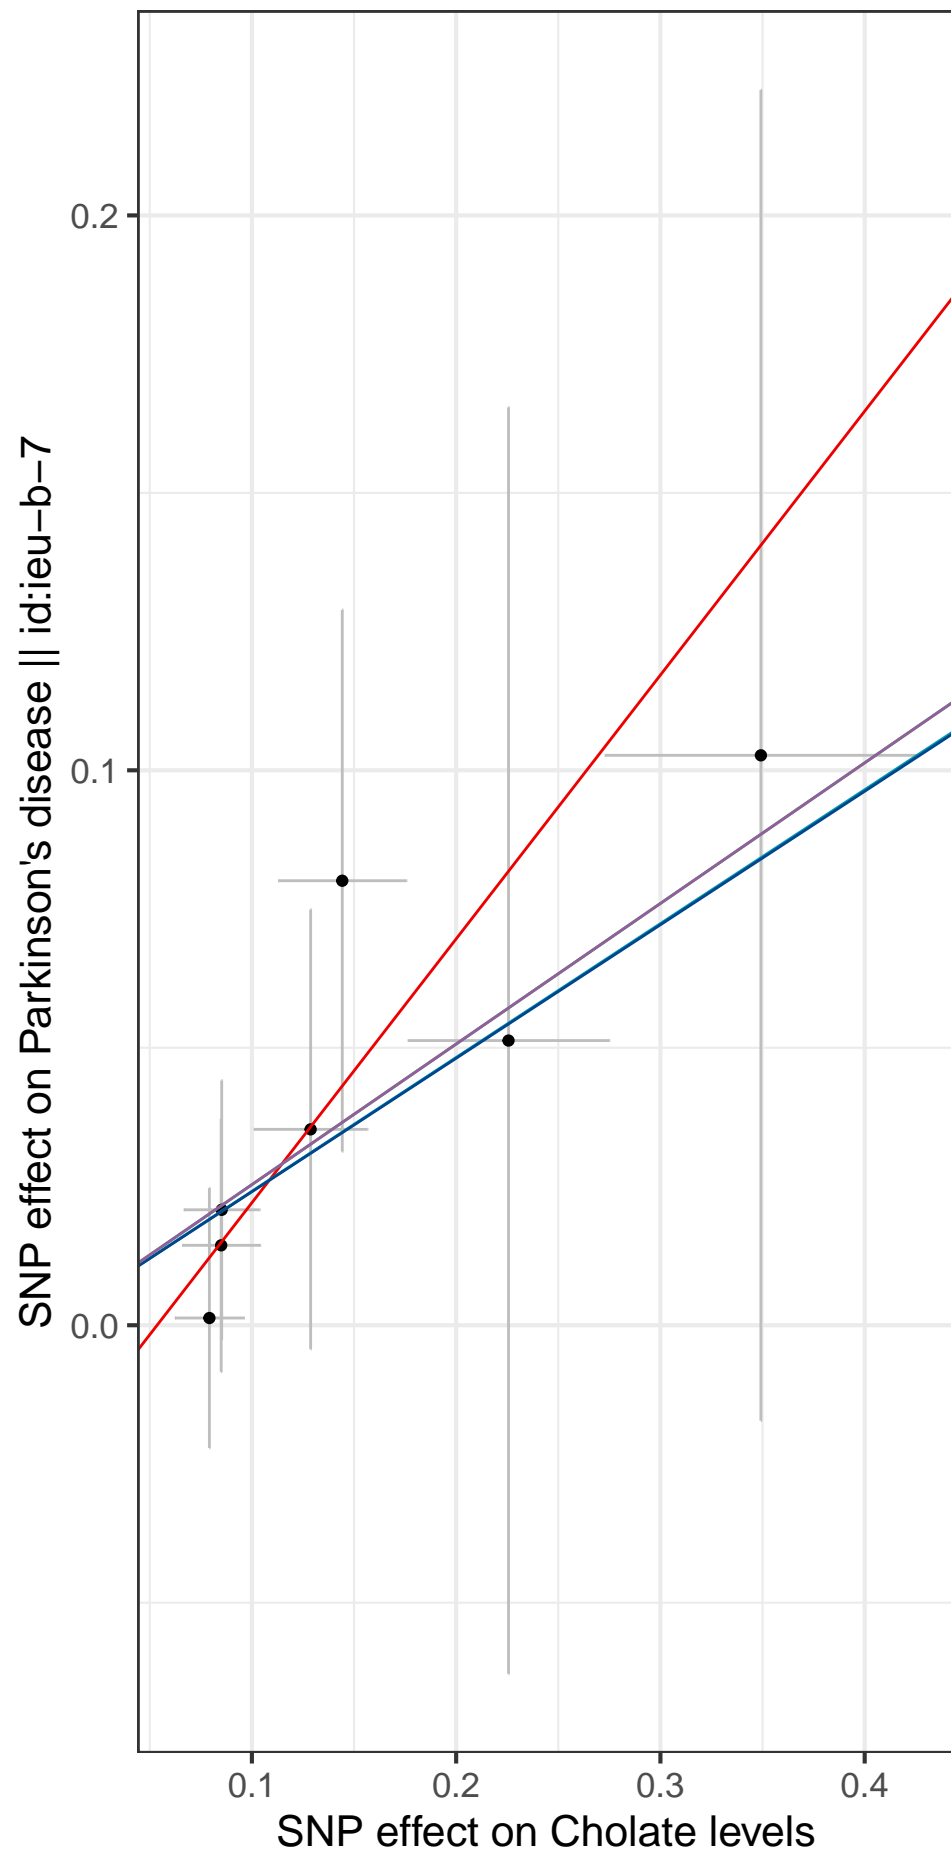

- MR Test
- Inverse variance weighted
  - MR Egger
  - Simple mode
  - Weighted median
  - Weighted mode



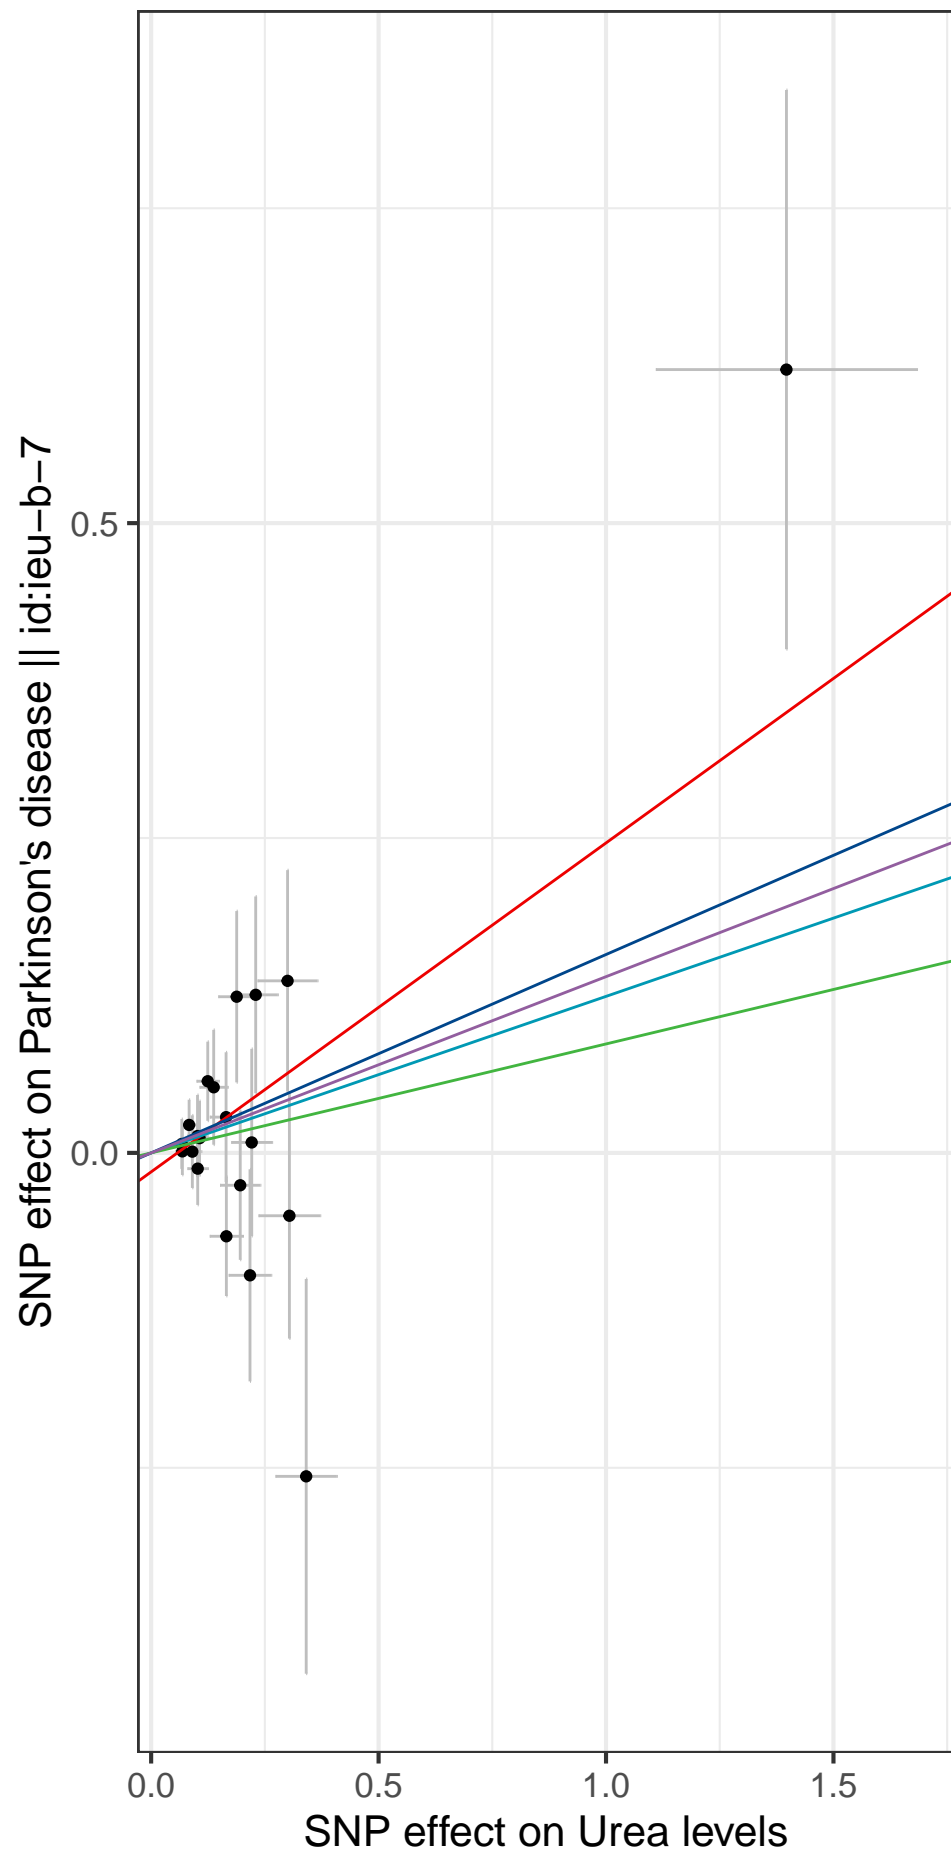

MR Test

- Inverse variance weighted
- MR Egger
- Simple mode
- Weighted median
- Weighted mode

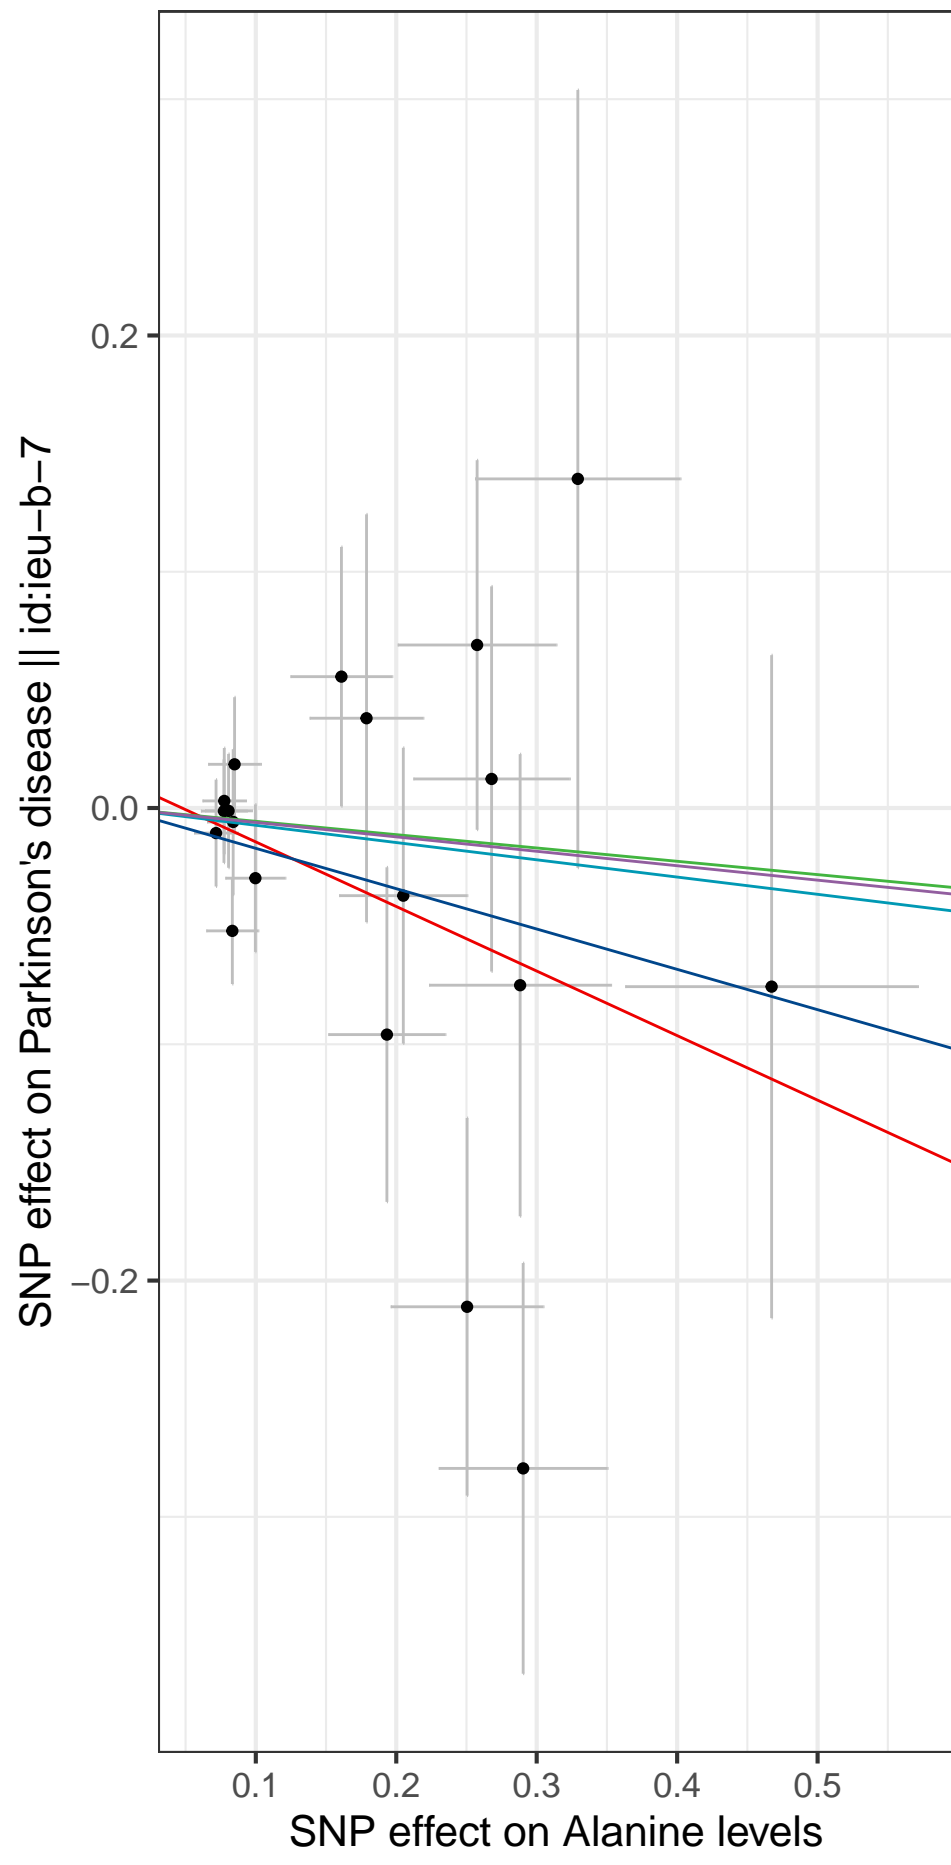

- MR Test
- Inverse variance weighted
  - MR Egger
  - Simple mode
  - Weighted median
  - Weighted mode

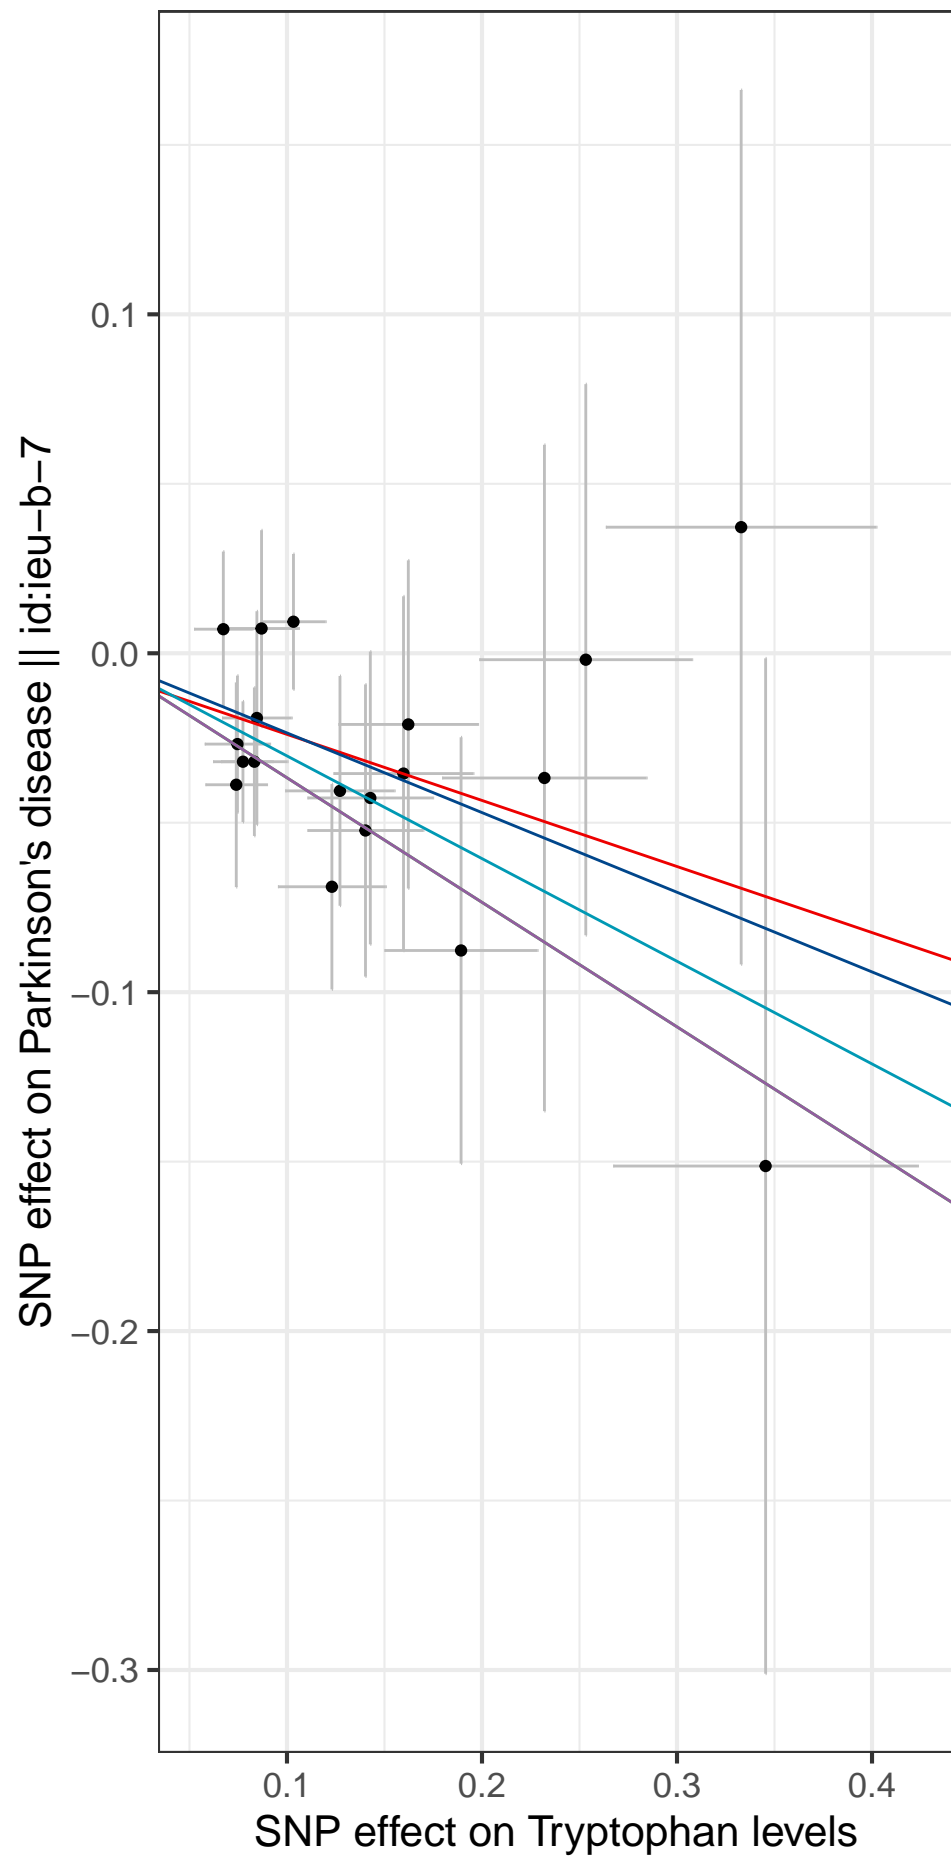

MR Test

- Inverse variance weighted
- MR Egger
- Simple mode
- Weighted median
- Weighted mode

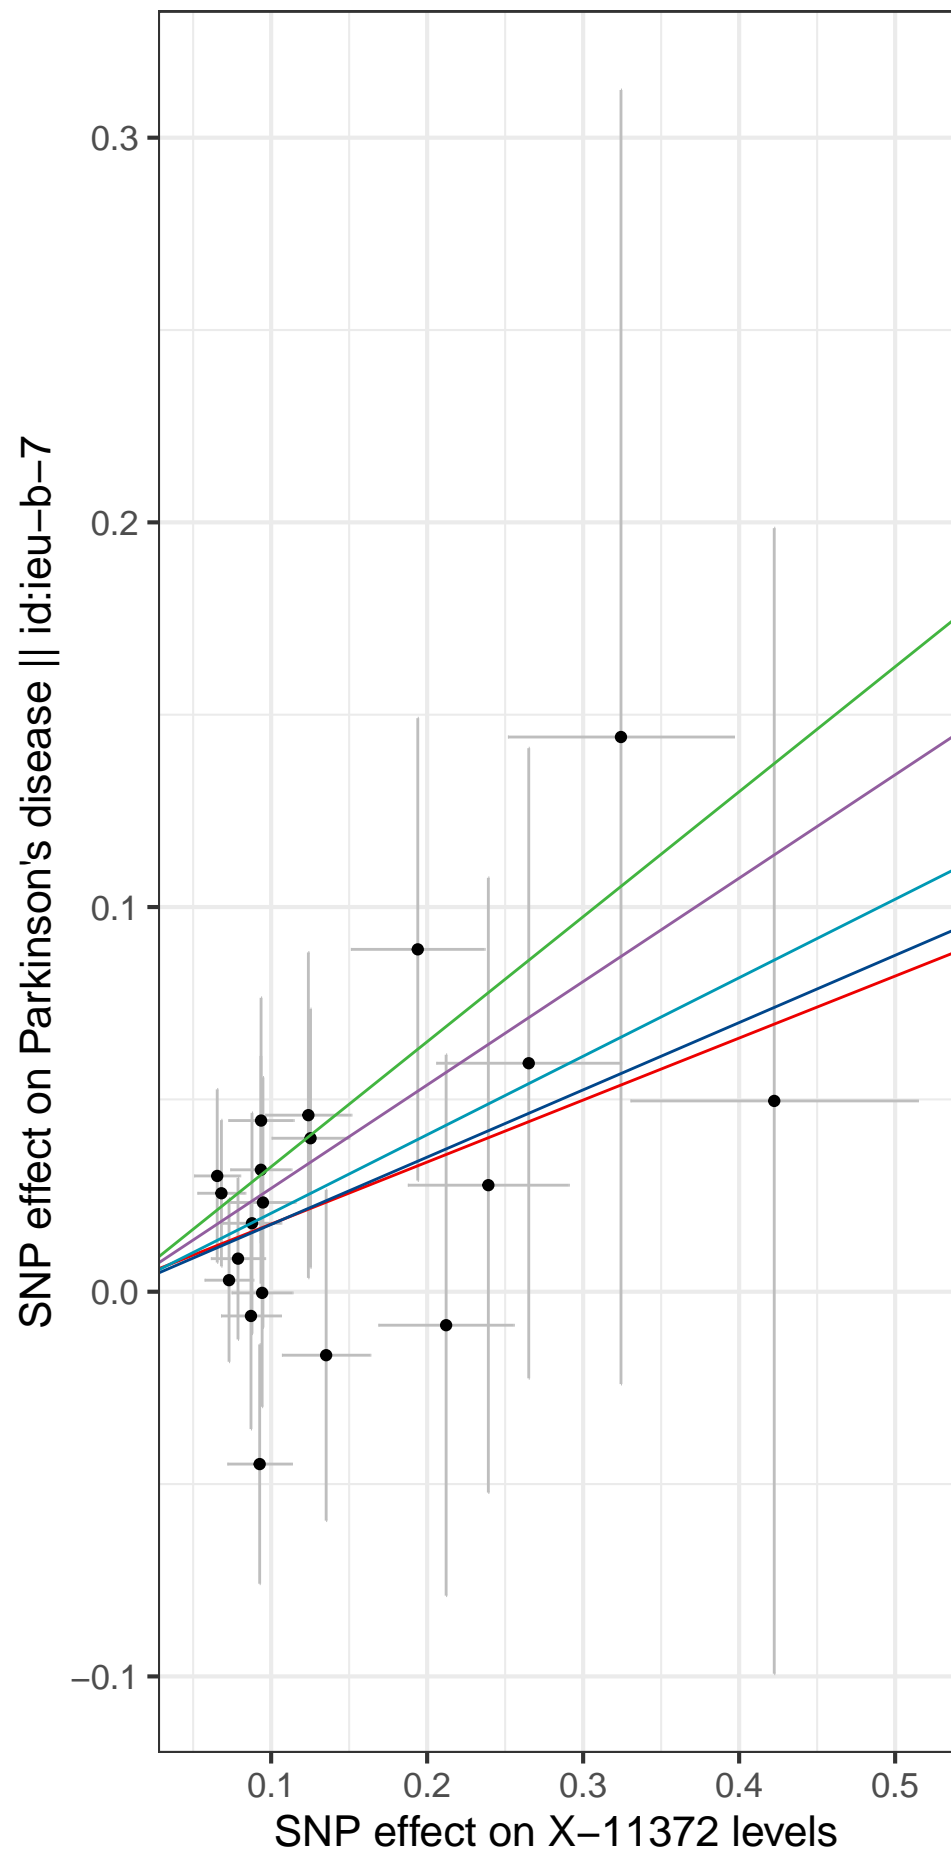

MR Test

- Inverse variance weighted
- MR Egger
- Simple mode
- Weighted median
- Weighted mode

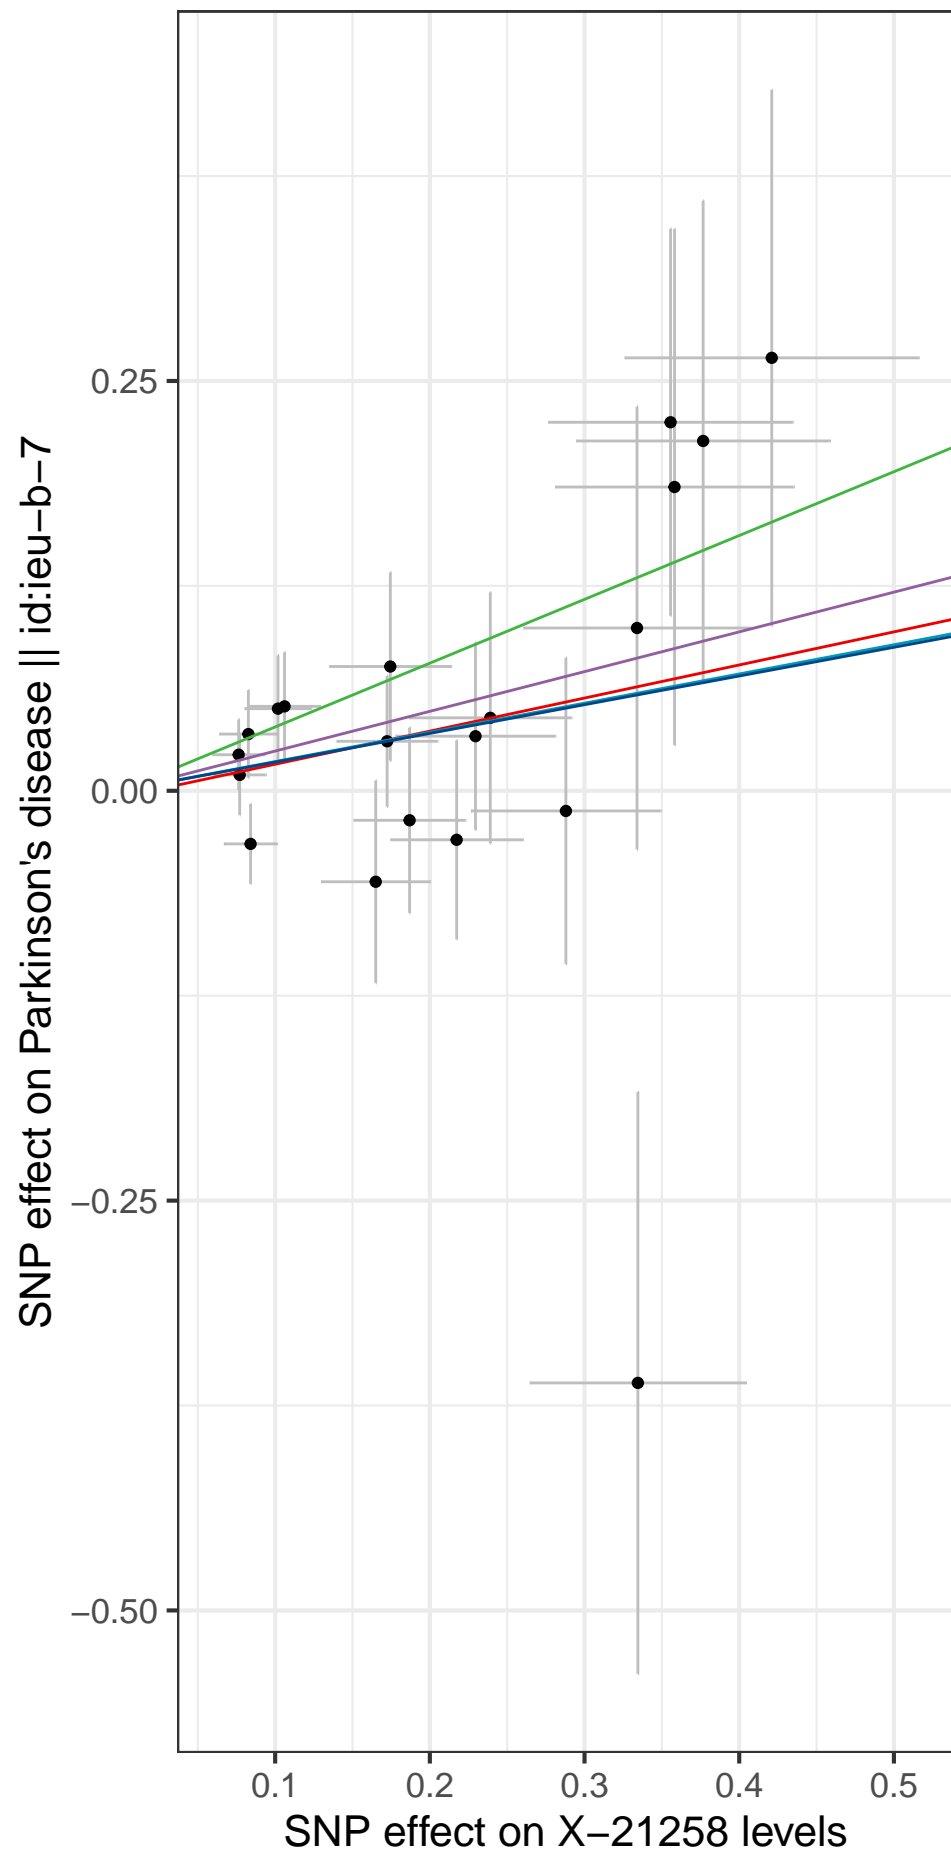

MR Test

- Inverse variance weighted
- MR Egger
- Simple mode
- Weighted median
- Weighted mode

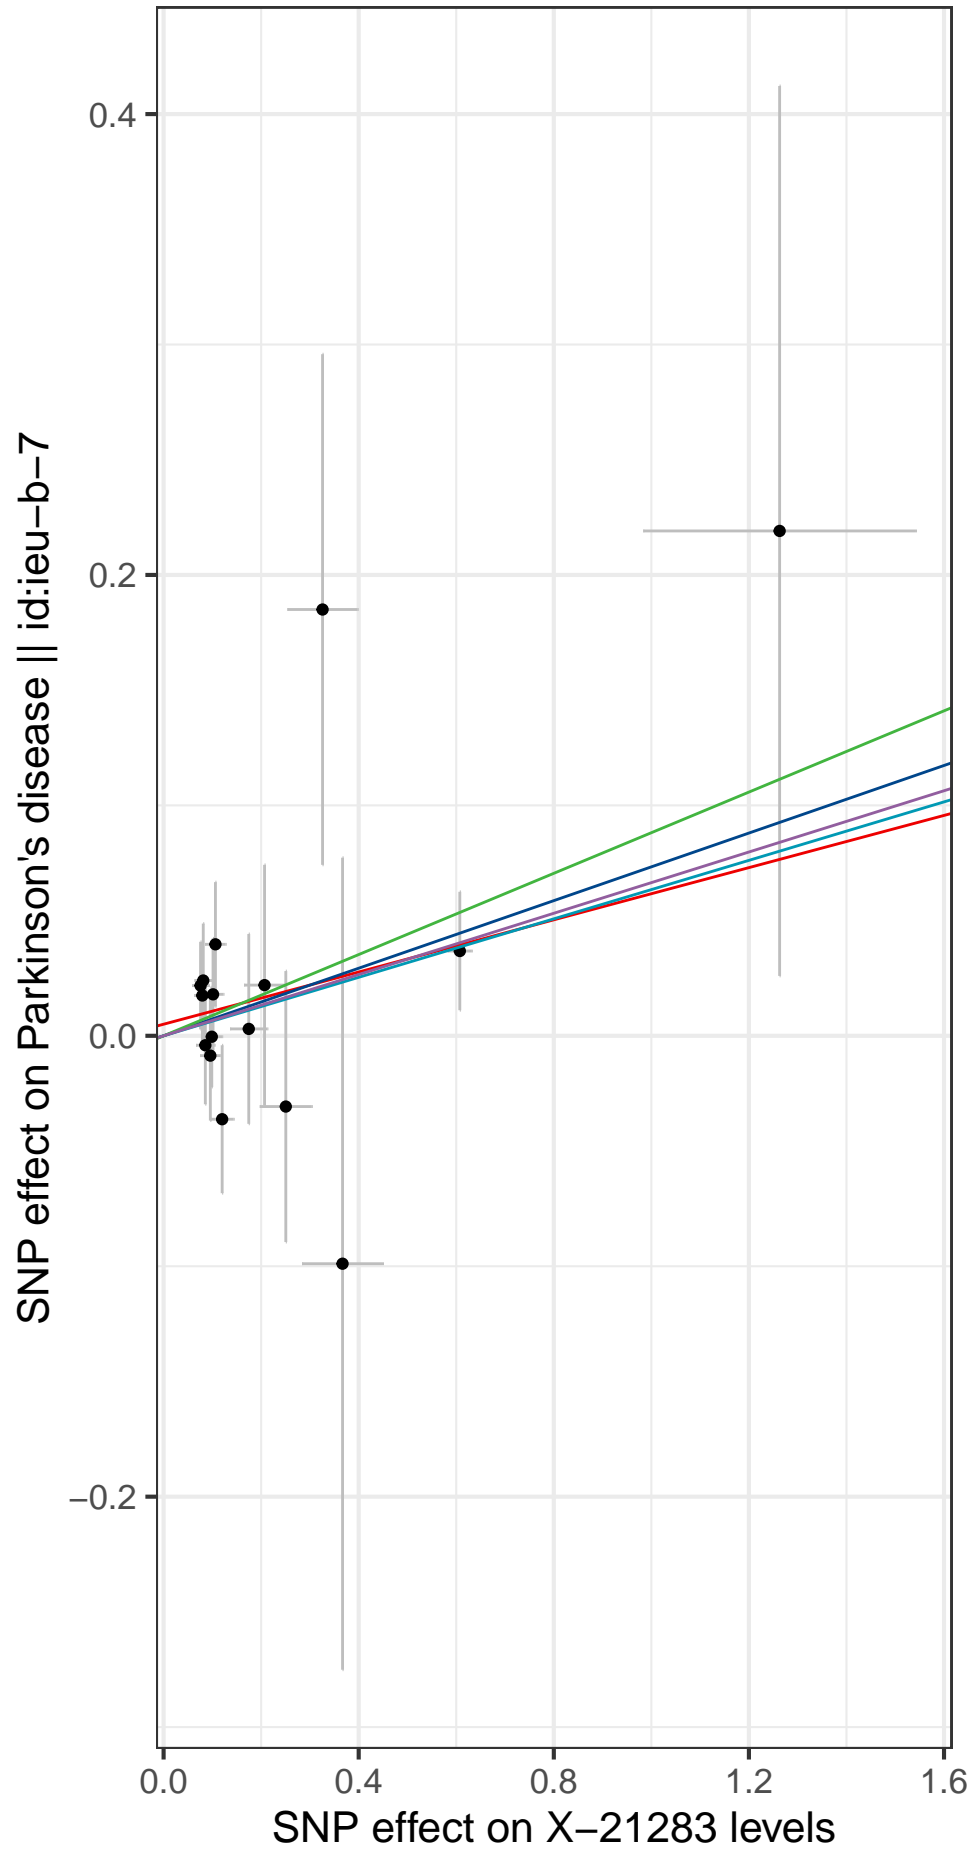

MR Test

- Inverse variance weighted
- MR Egger
- Simple mode
- Weighted median
- Weighted mode

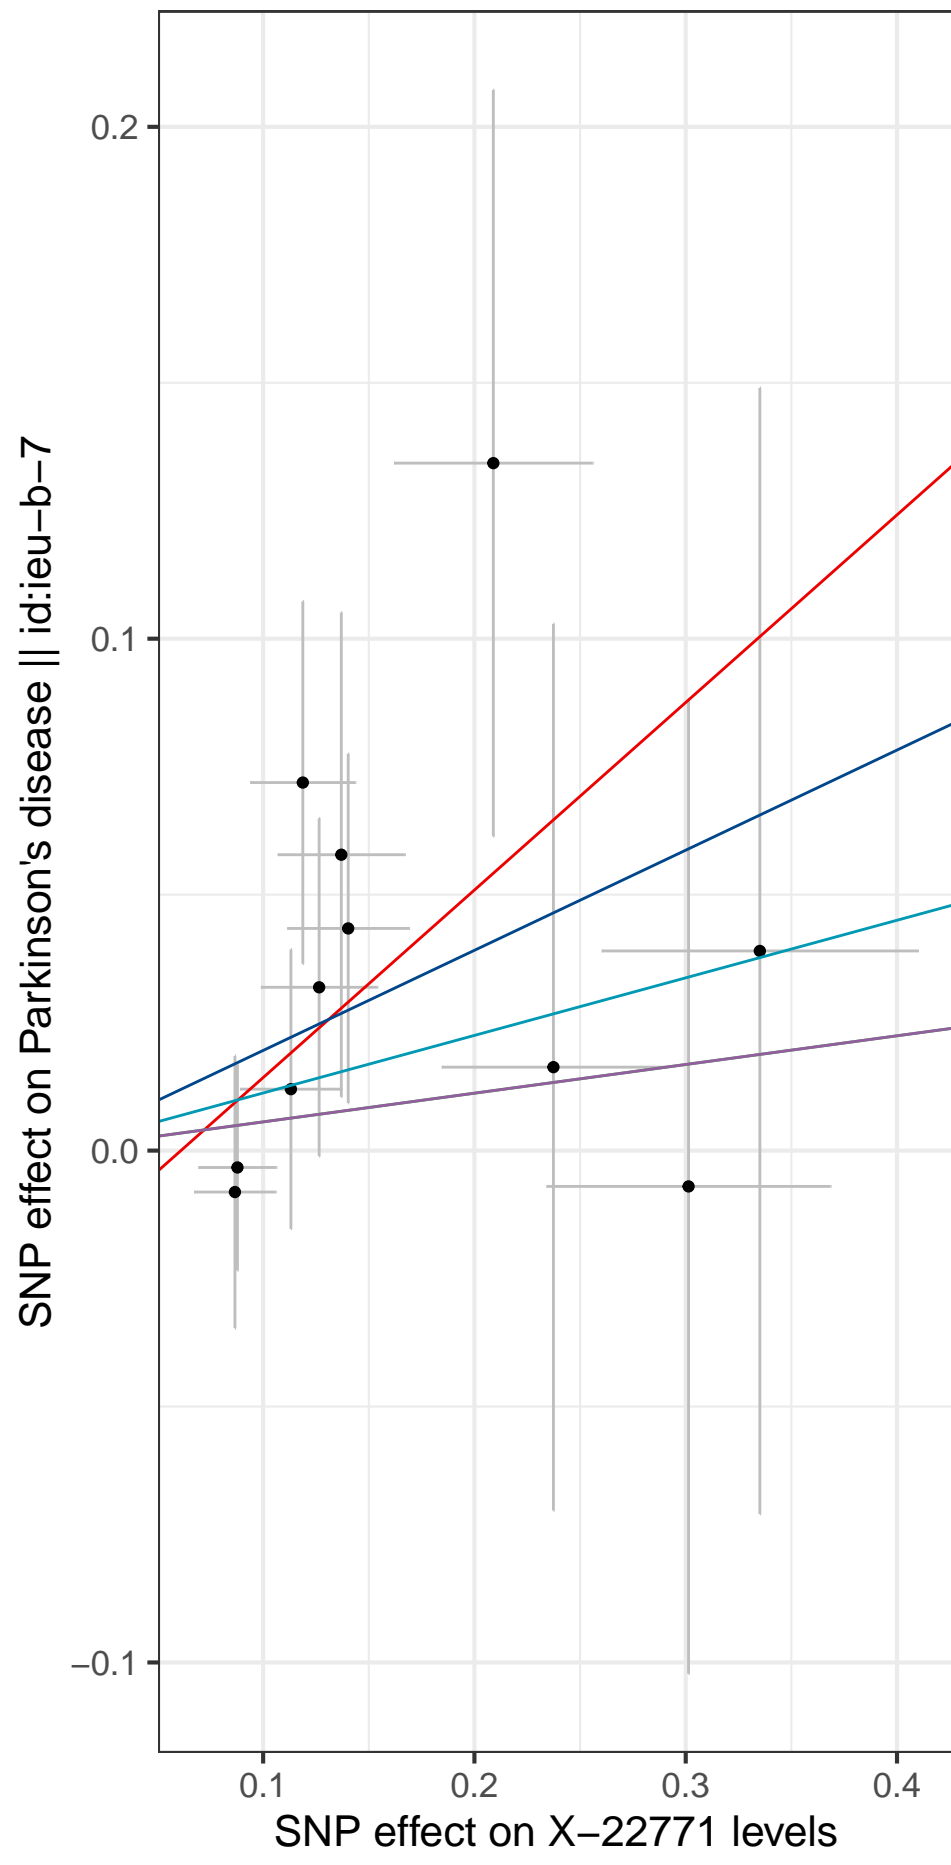

MR Test

- Inverse variance weighted
- MR Egger
- Simple mode
- Weighted median
- Weighted mode

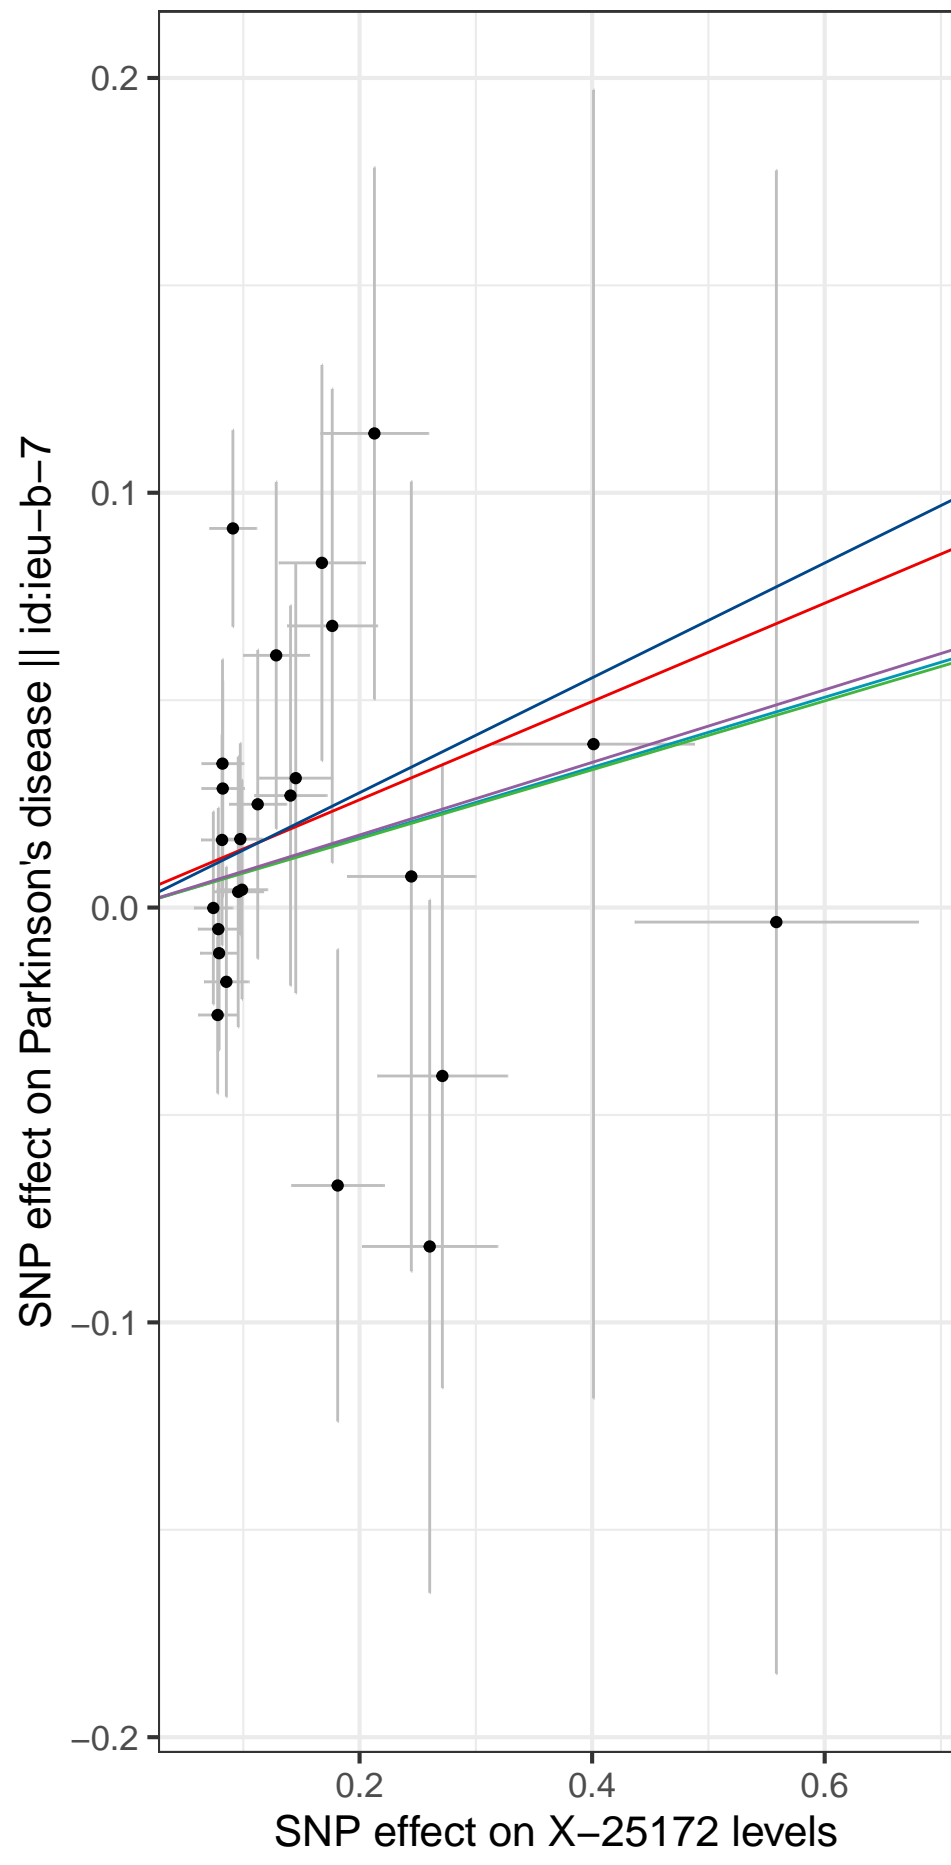

MR Test

- Inverse variance weighted
- MR Egger
- Simple mode
- Weighted median
- Weighted mode



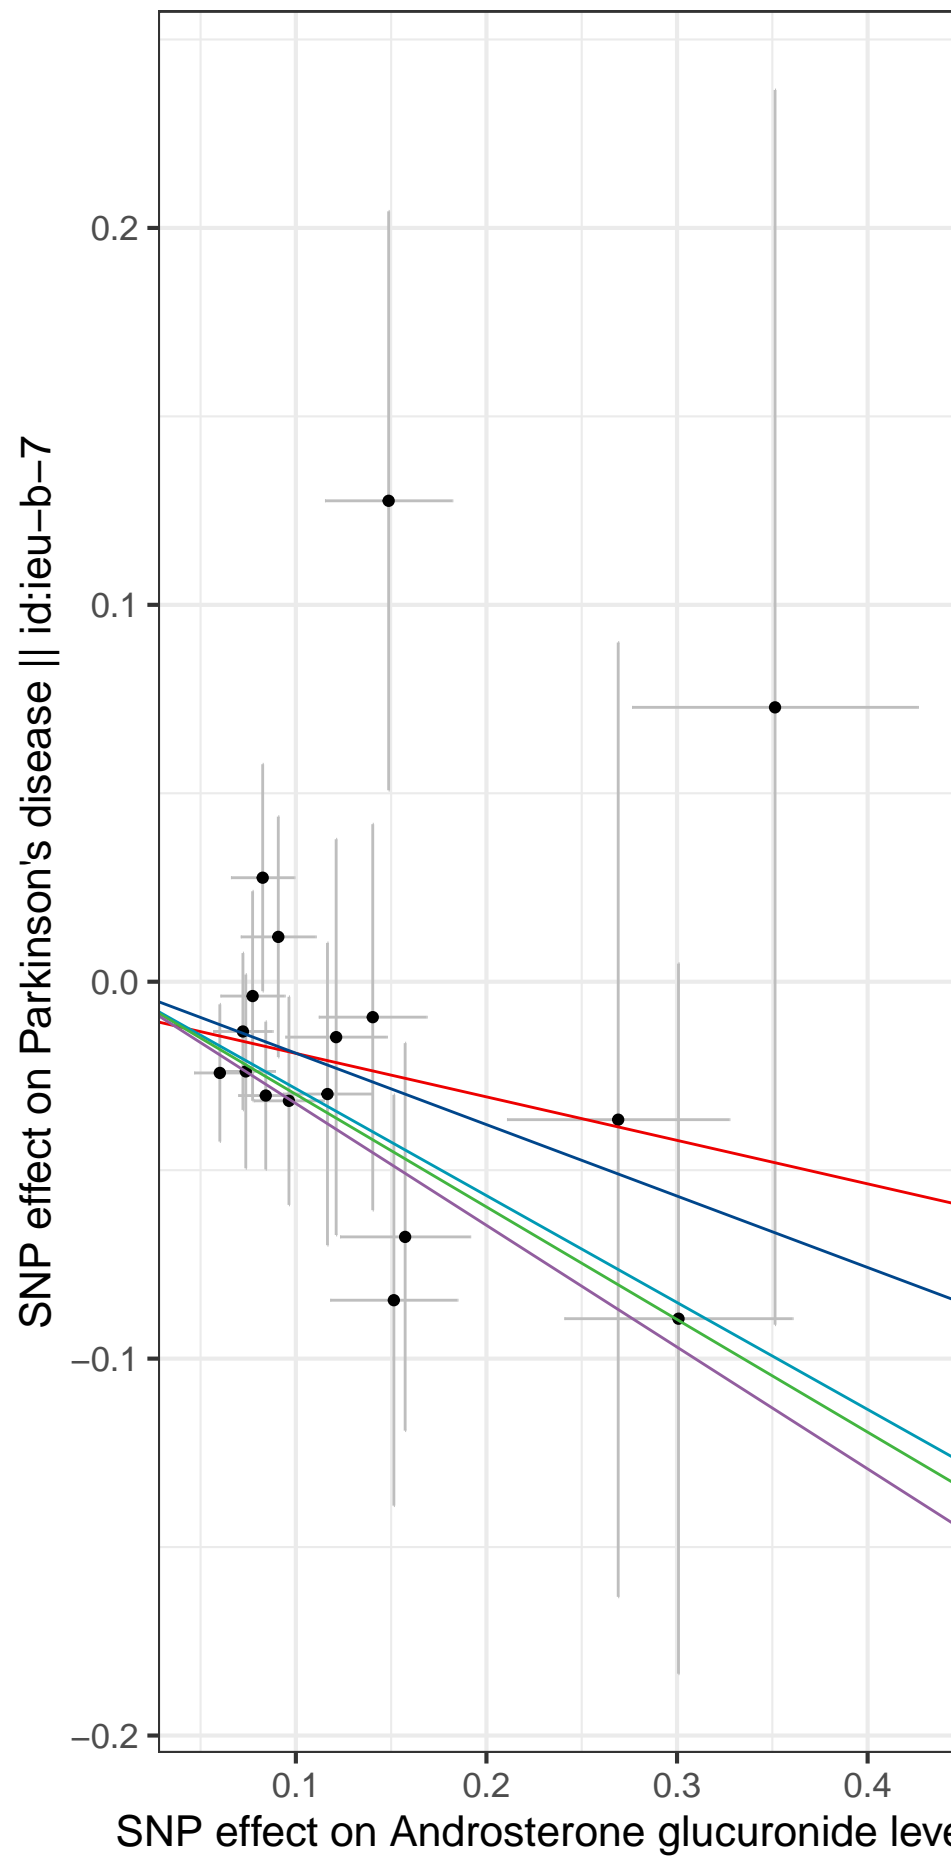

- MR Test
- Inverse variance weighted
  - MR Egger
  - Simple mode
  - Weighted median
  - Weighted mode

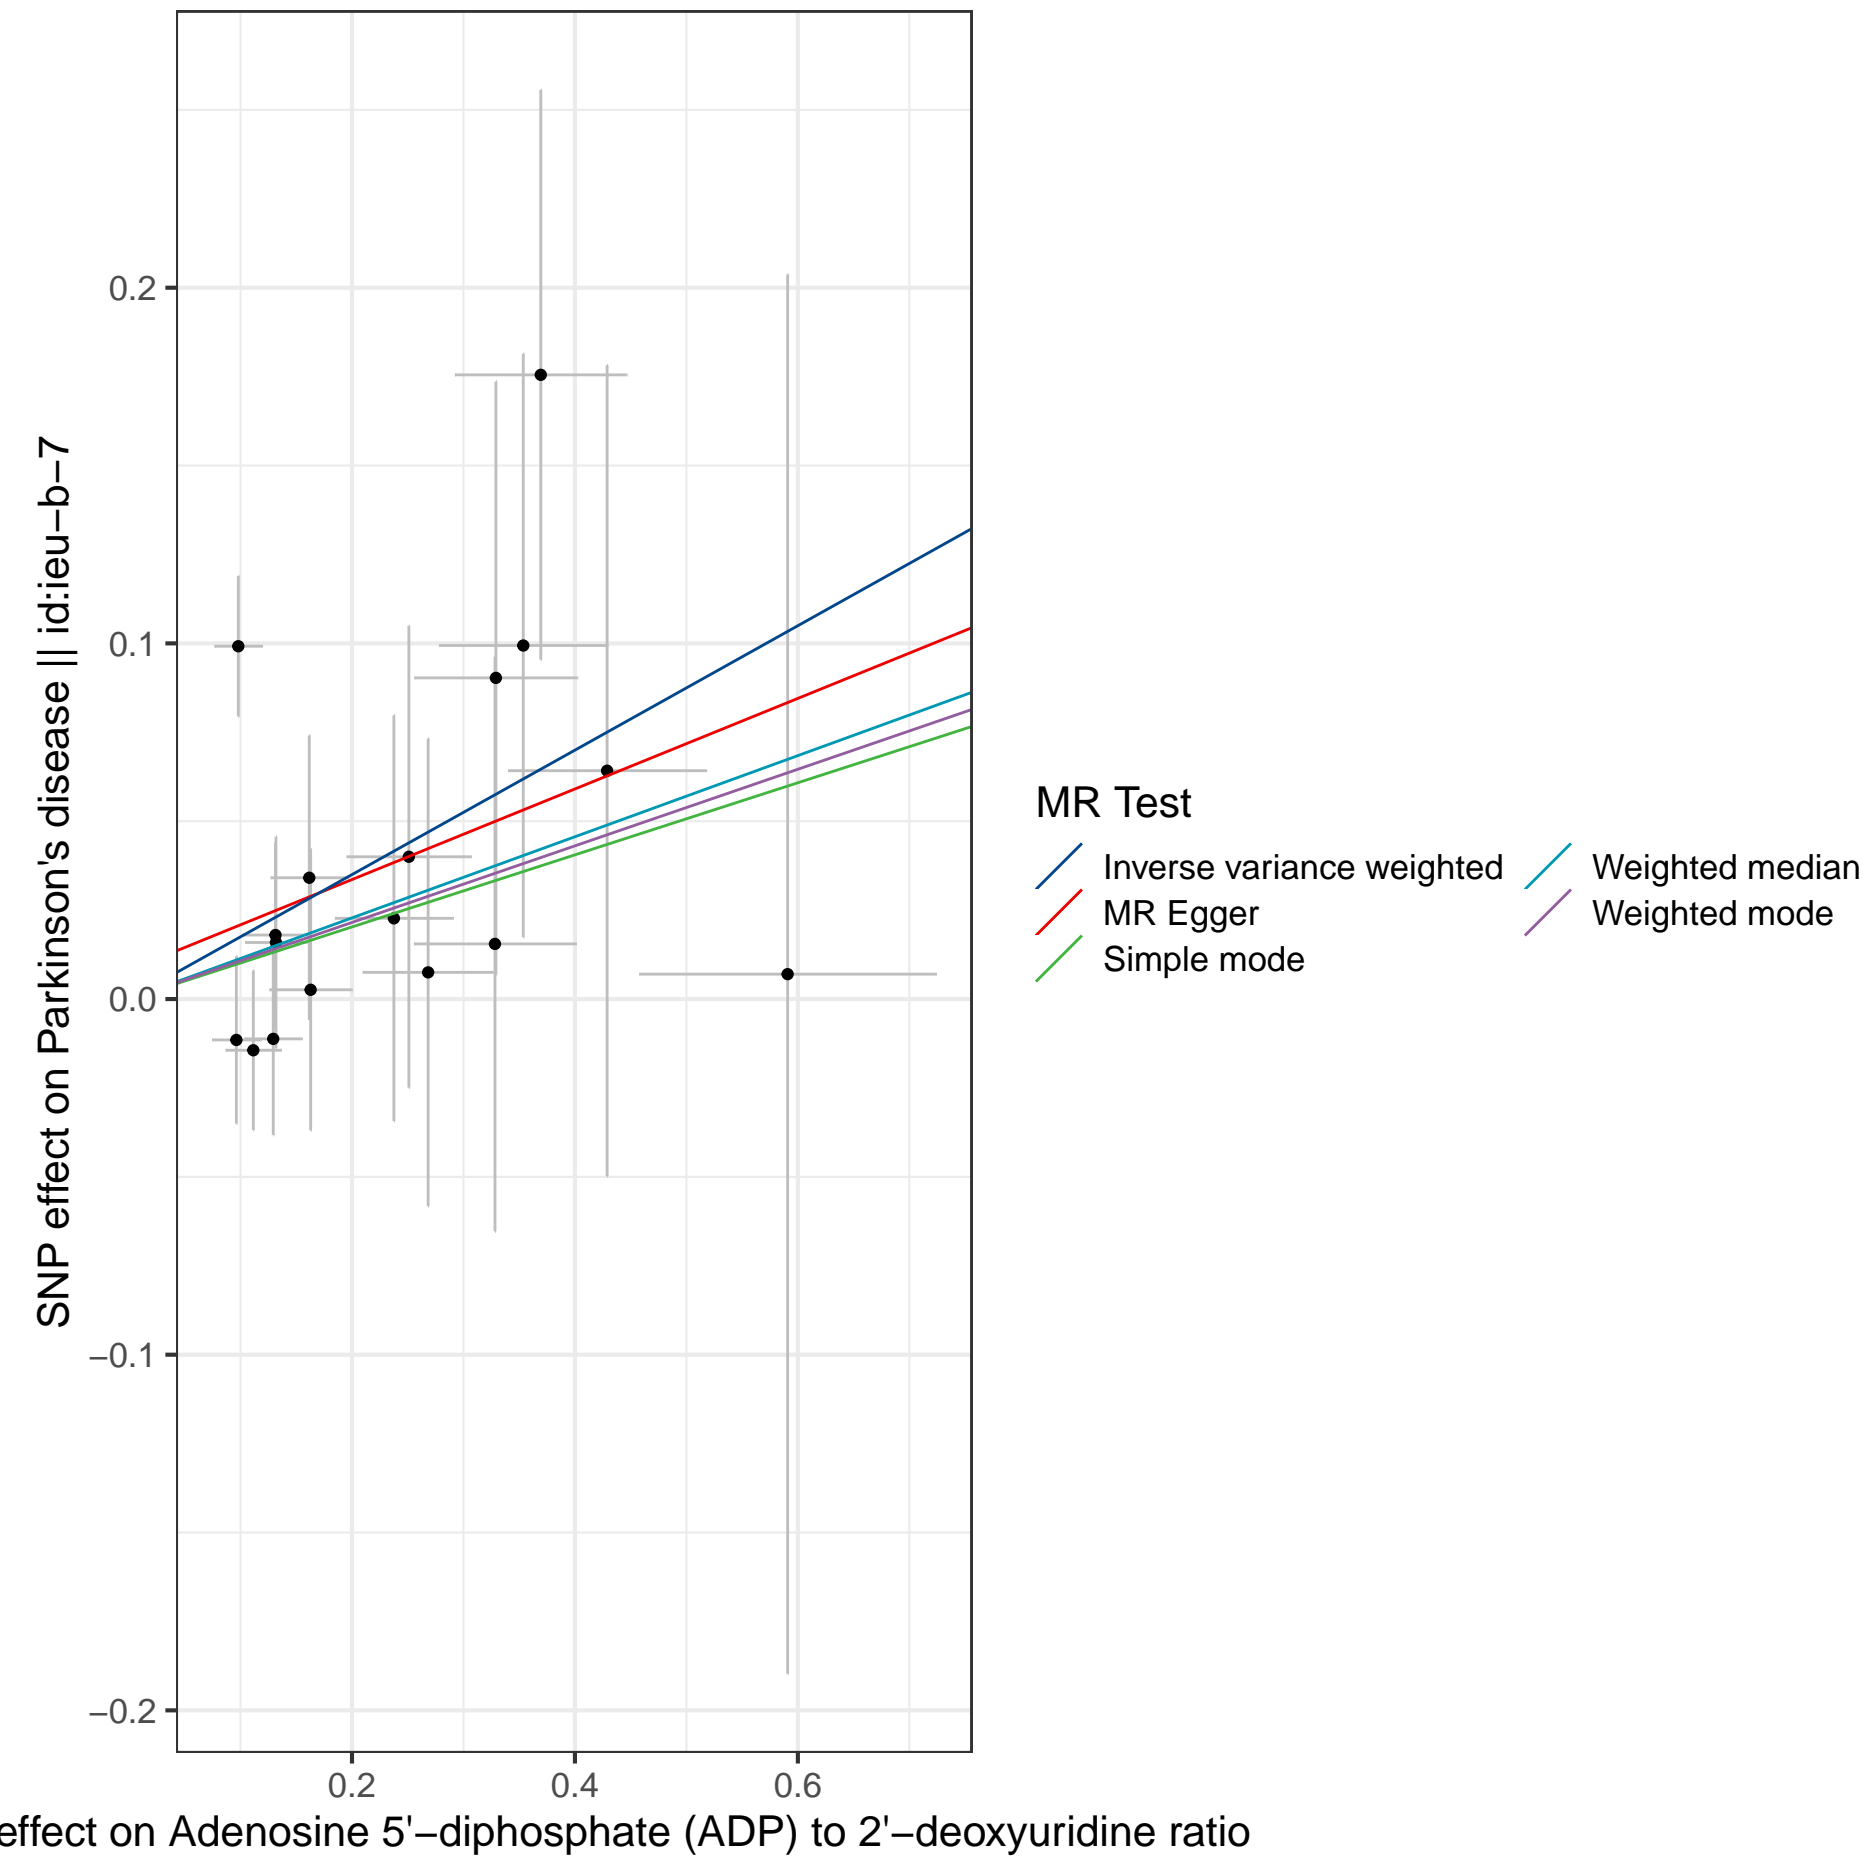

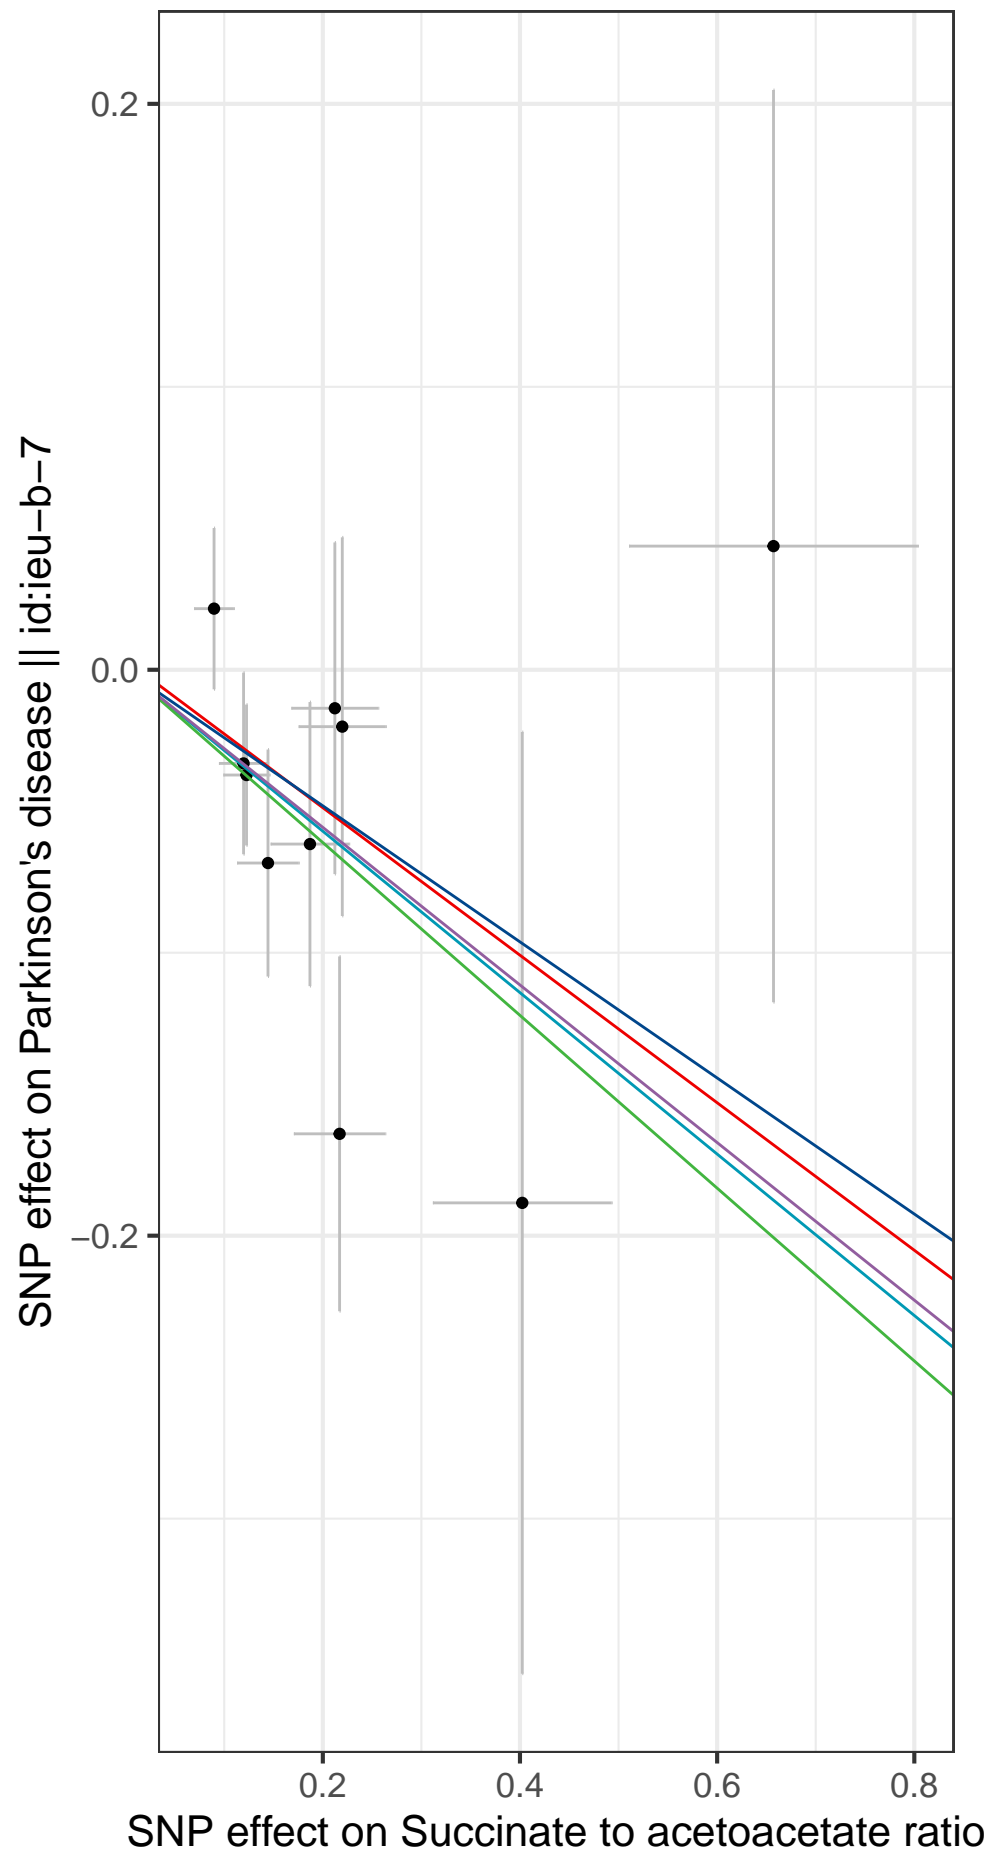

- MR Test
- Inverse variance weighted
  - MR Egger
  - Simple mode
  - Weighted median
  - Weighted mode

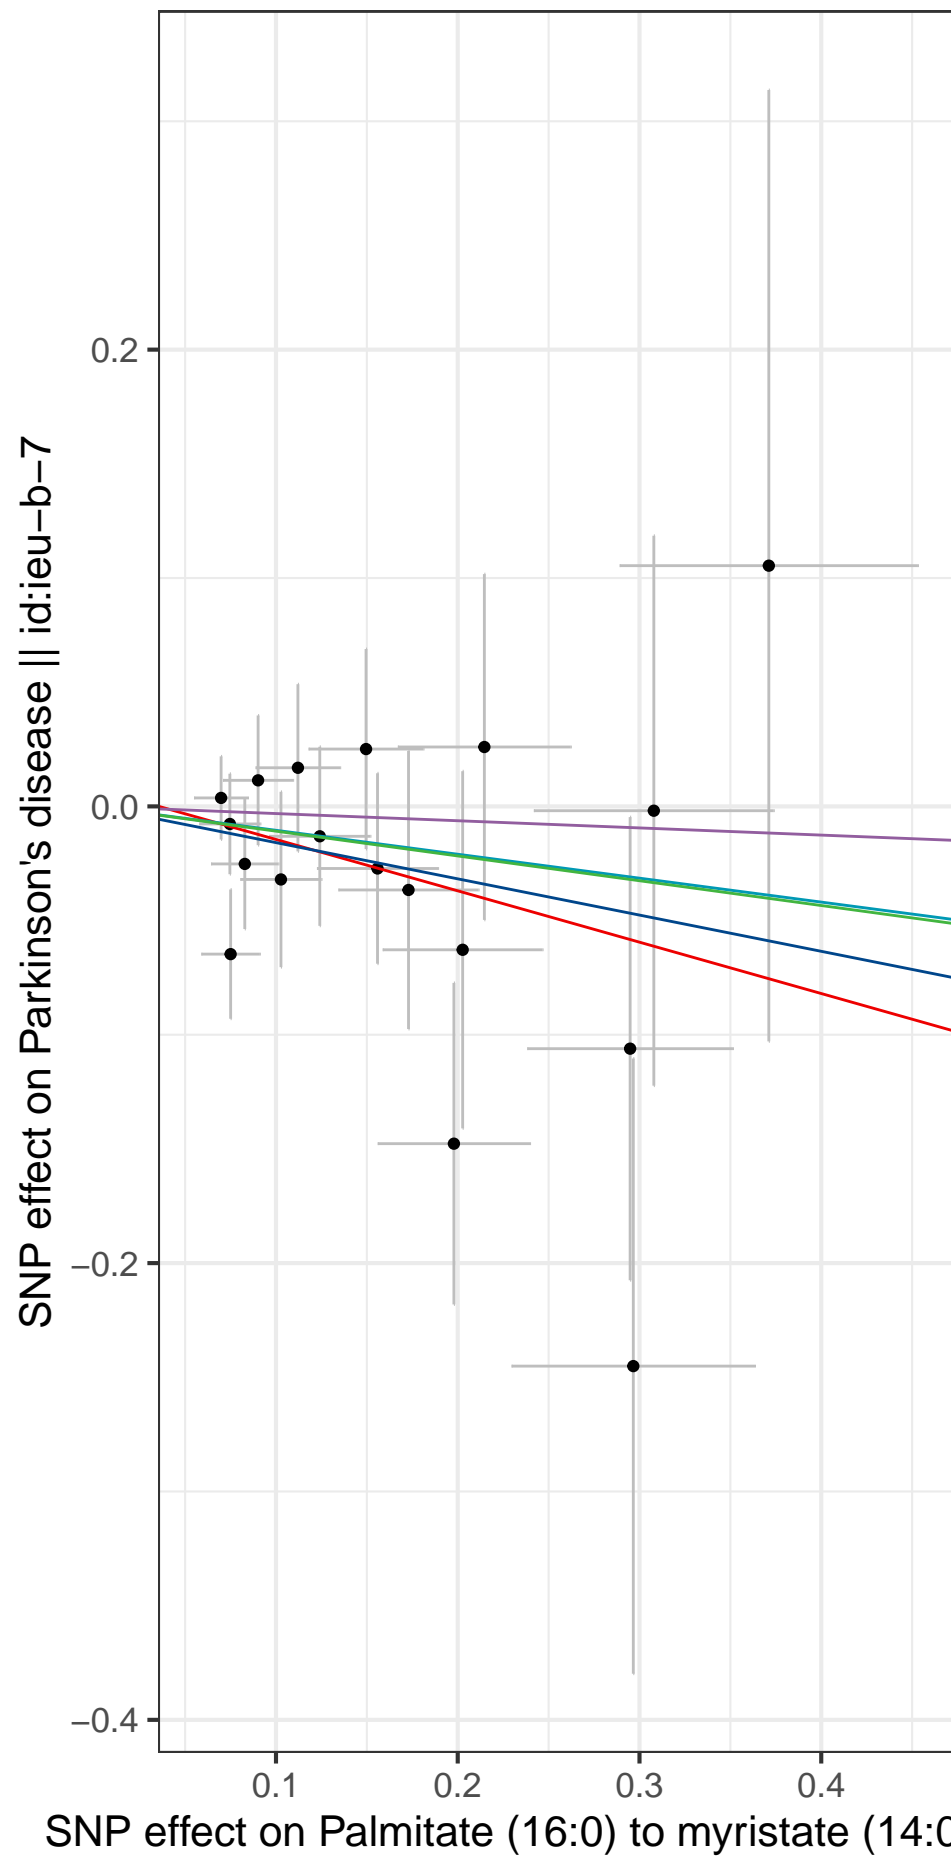

MR Test

- Inverse variance weighted
- MR Egger
- Simple mode
- Weighted median
- Weighted mode

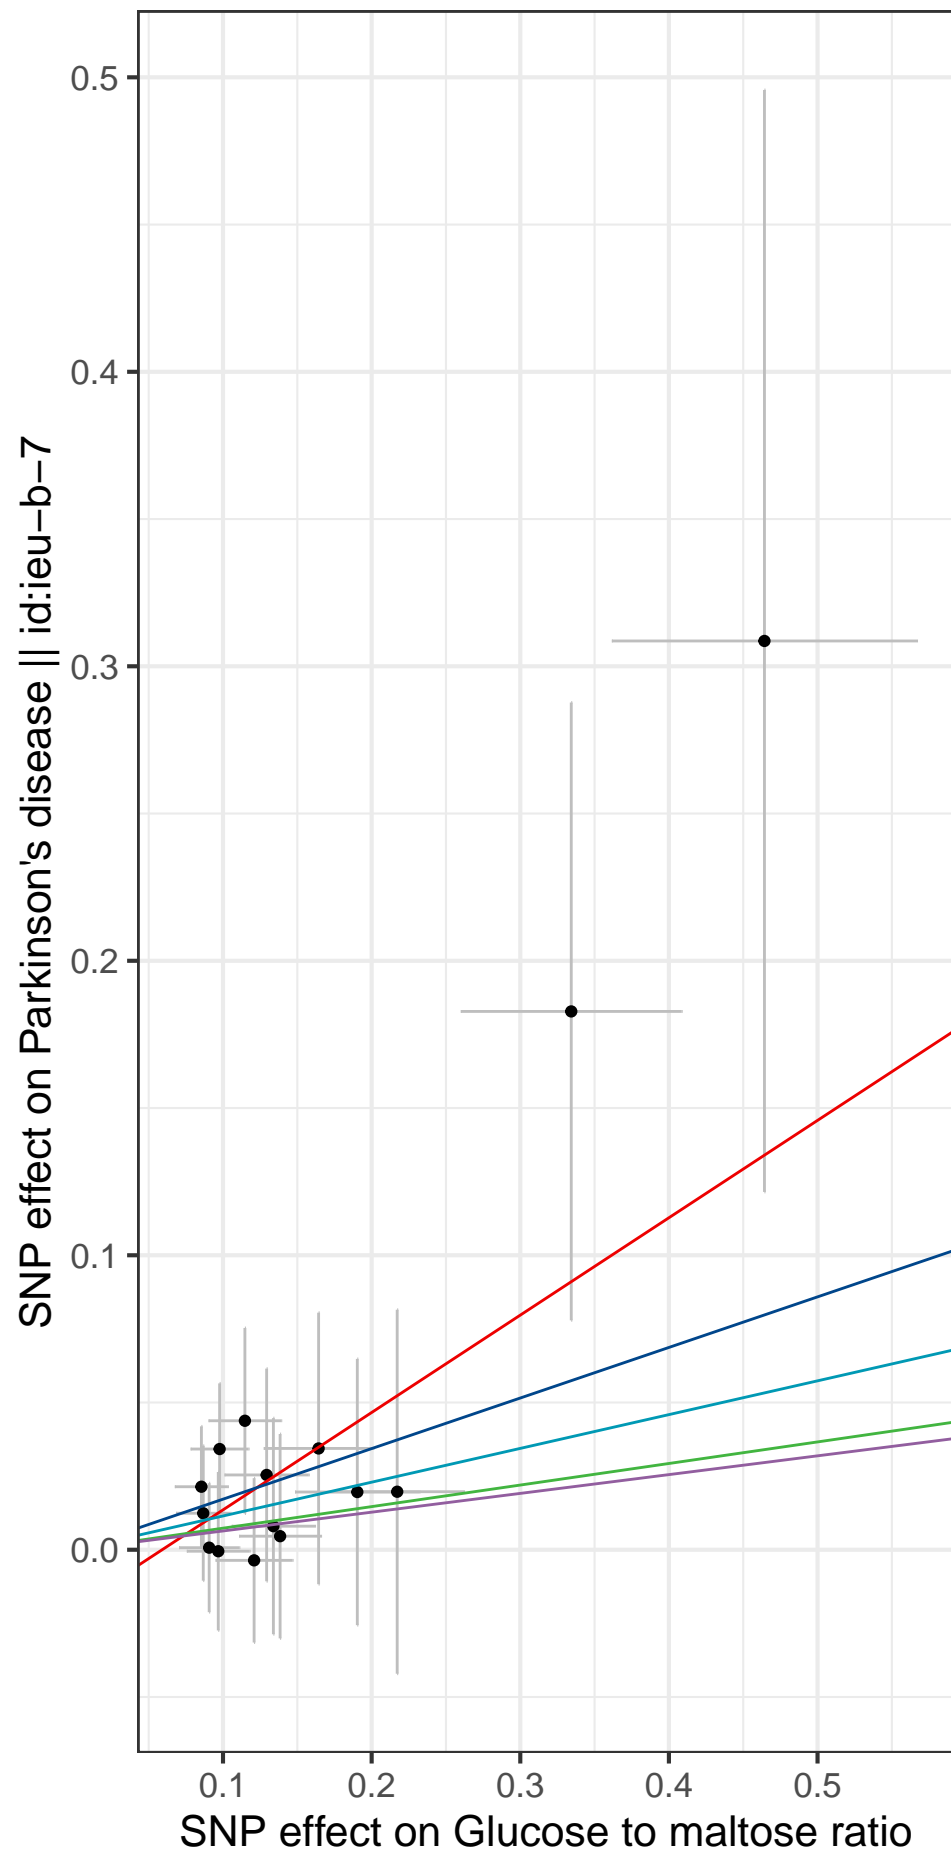

MR Test

- Inverse variance weighted
- MR Egger
- Simple mode
- Weighted median
- Weighted mode

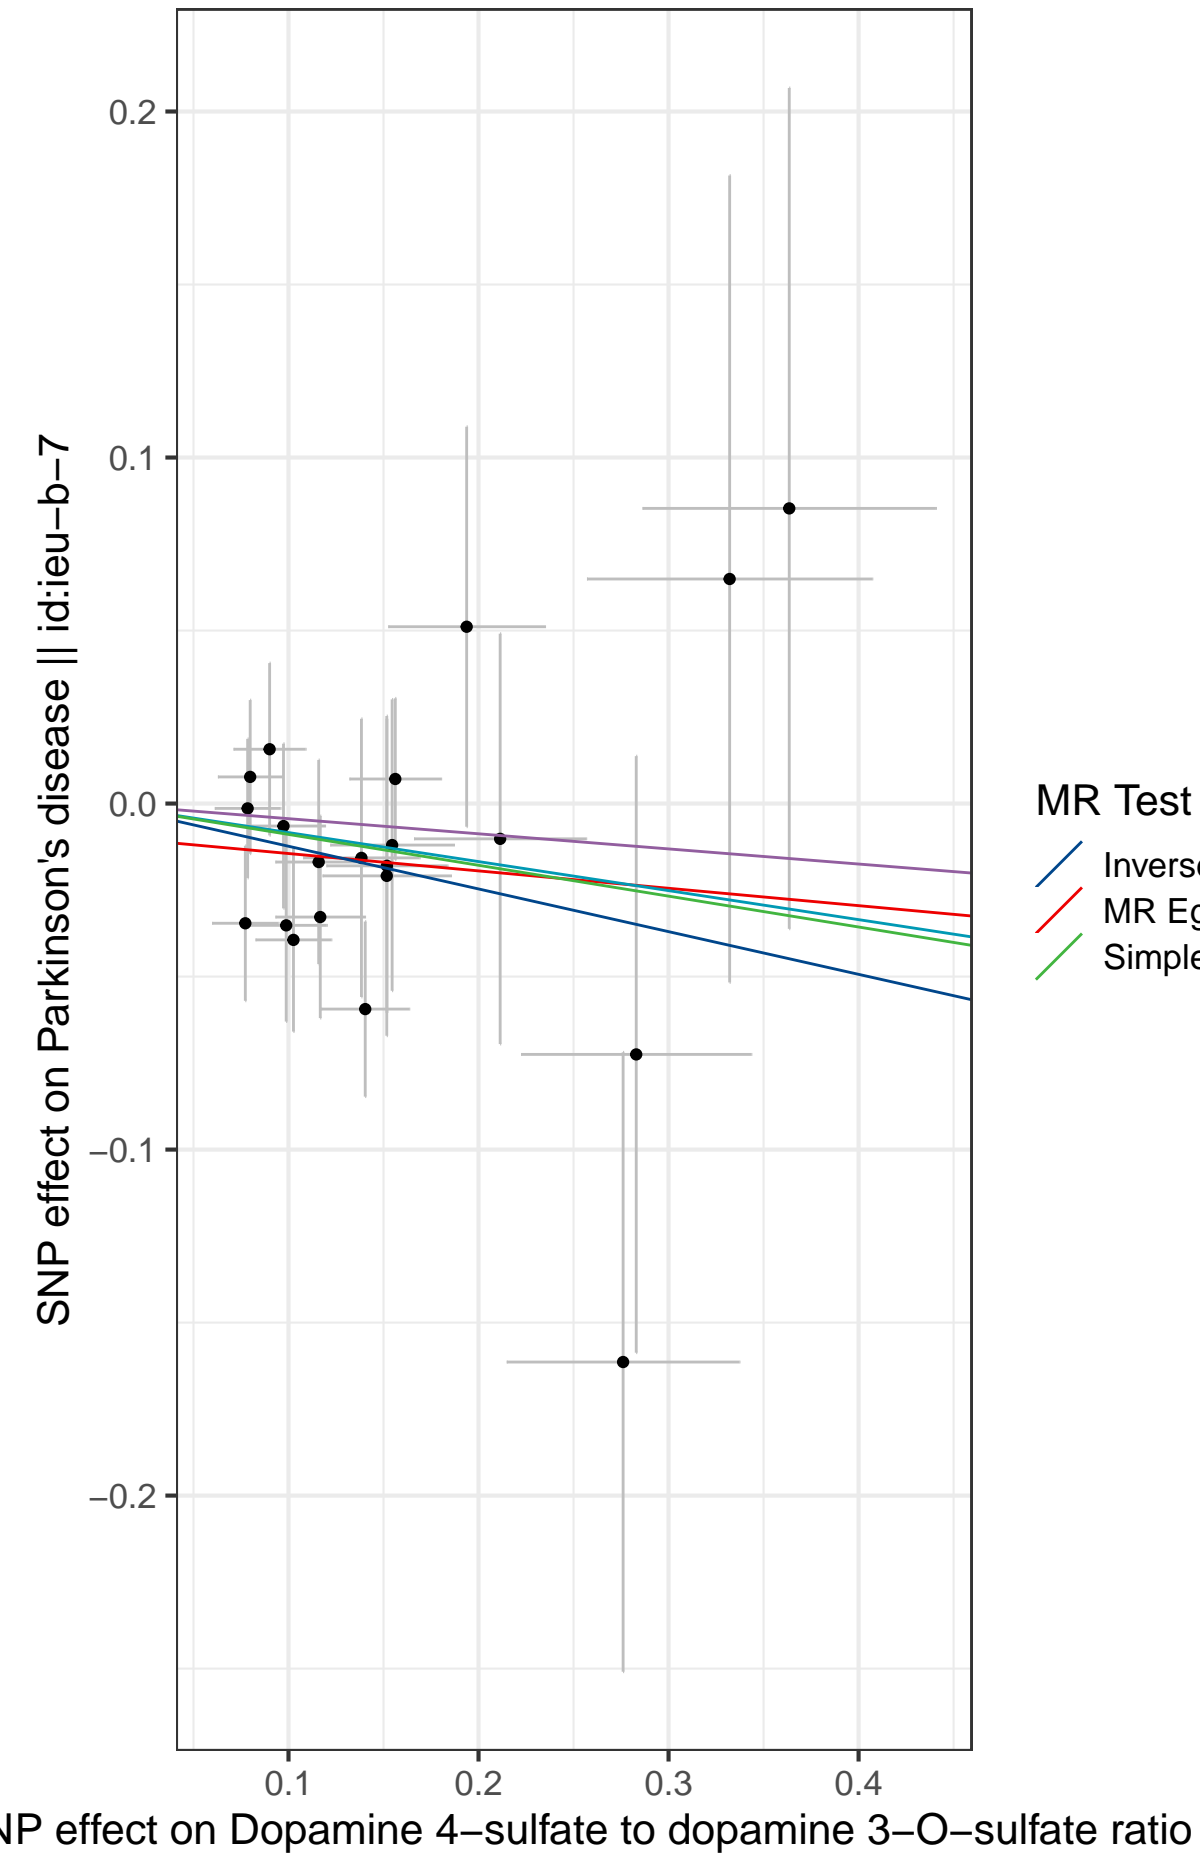

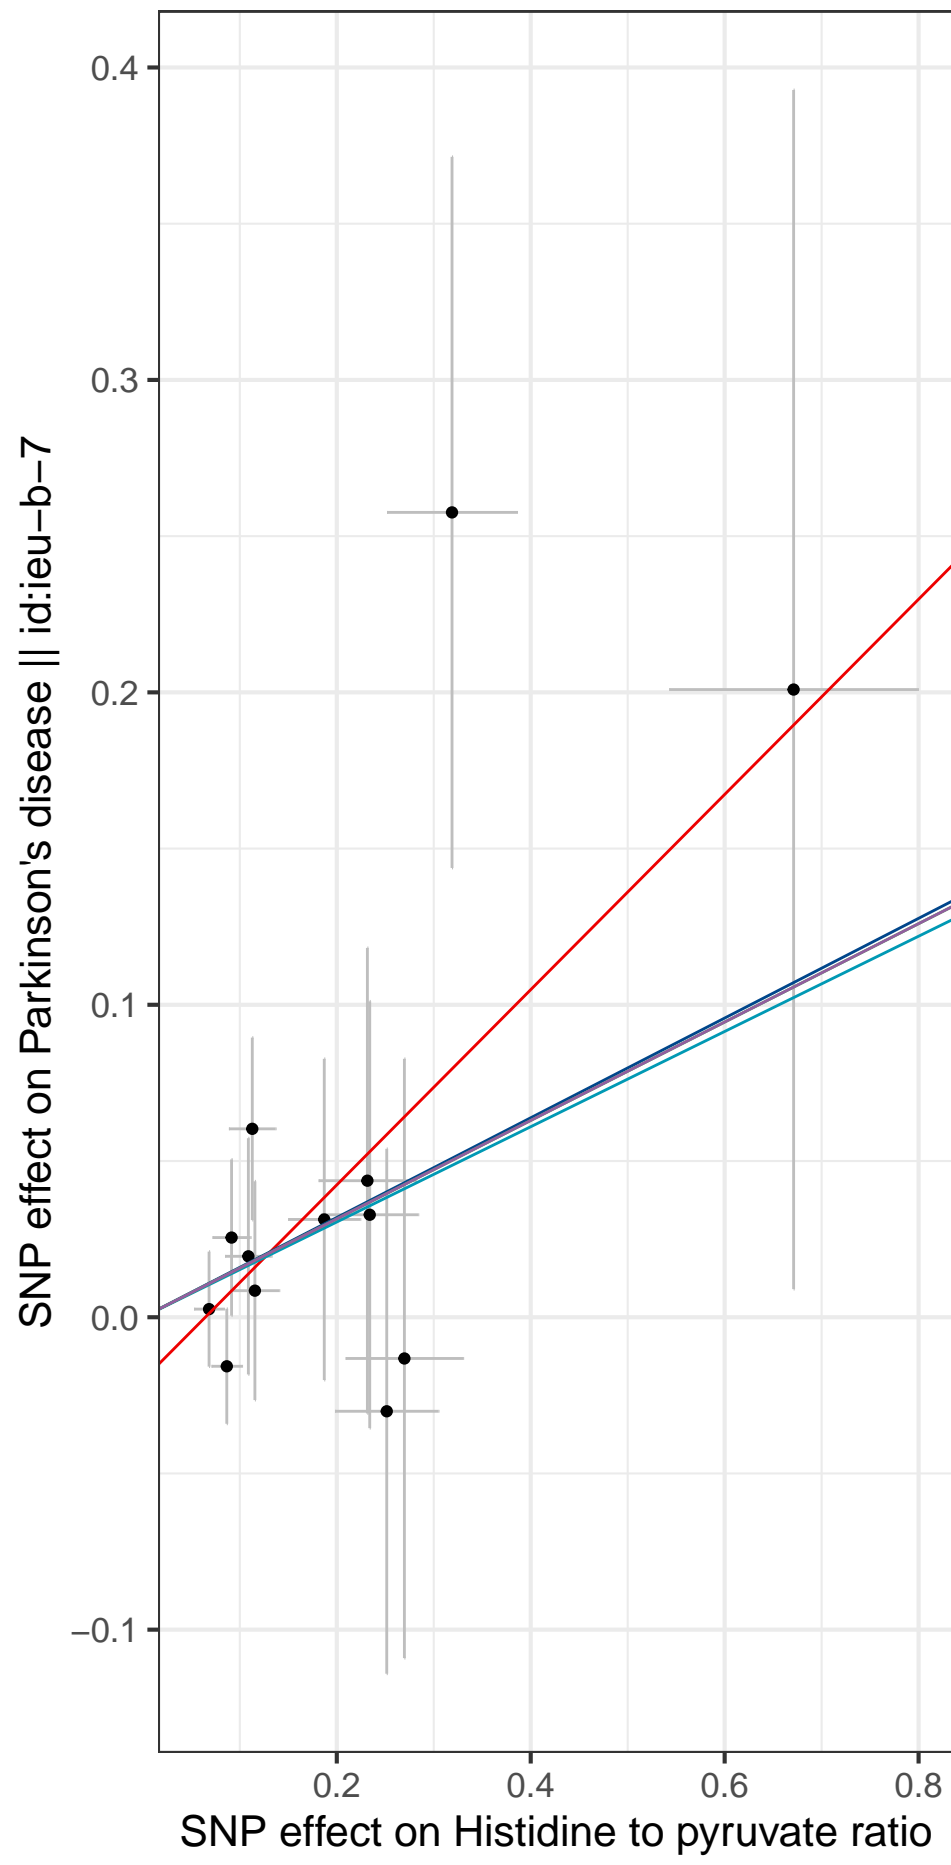

- MR Test
- Inverse variance weighted
  - MR Egger
  - Simple mode
  - Weighted median
  - Weighted mode

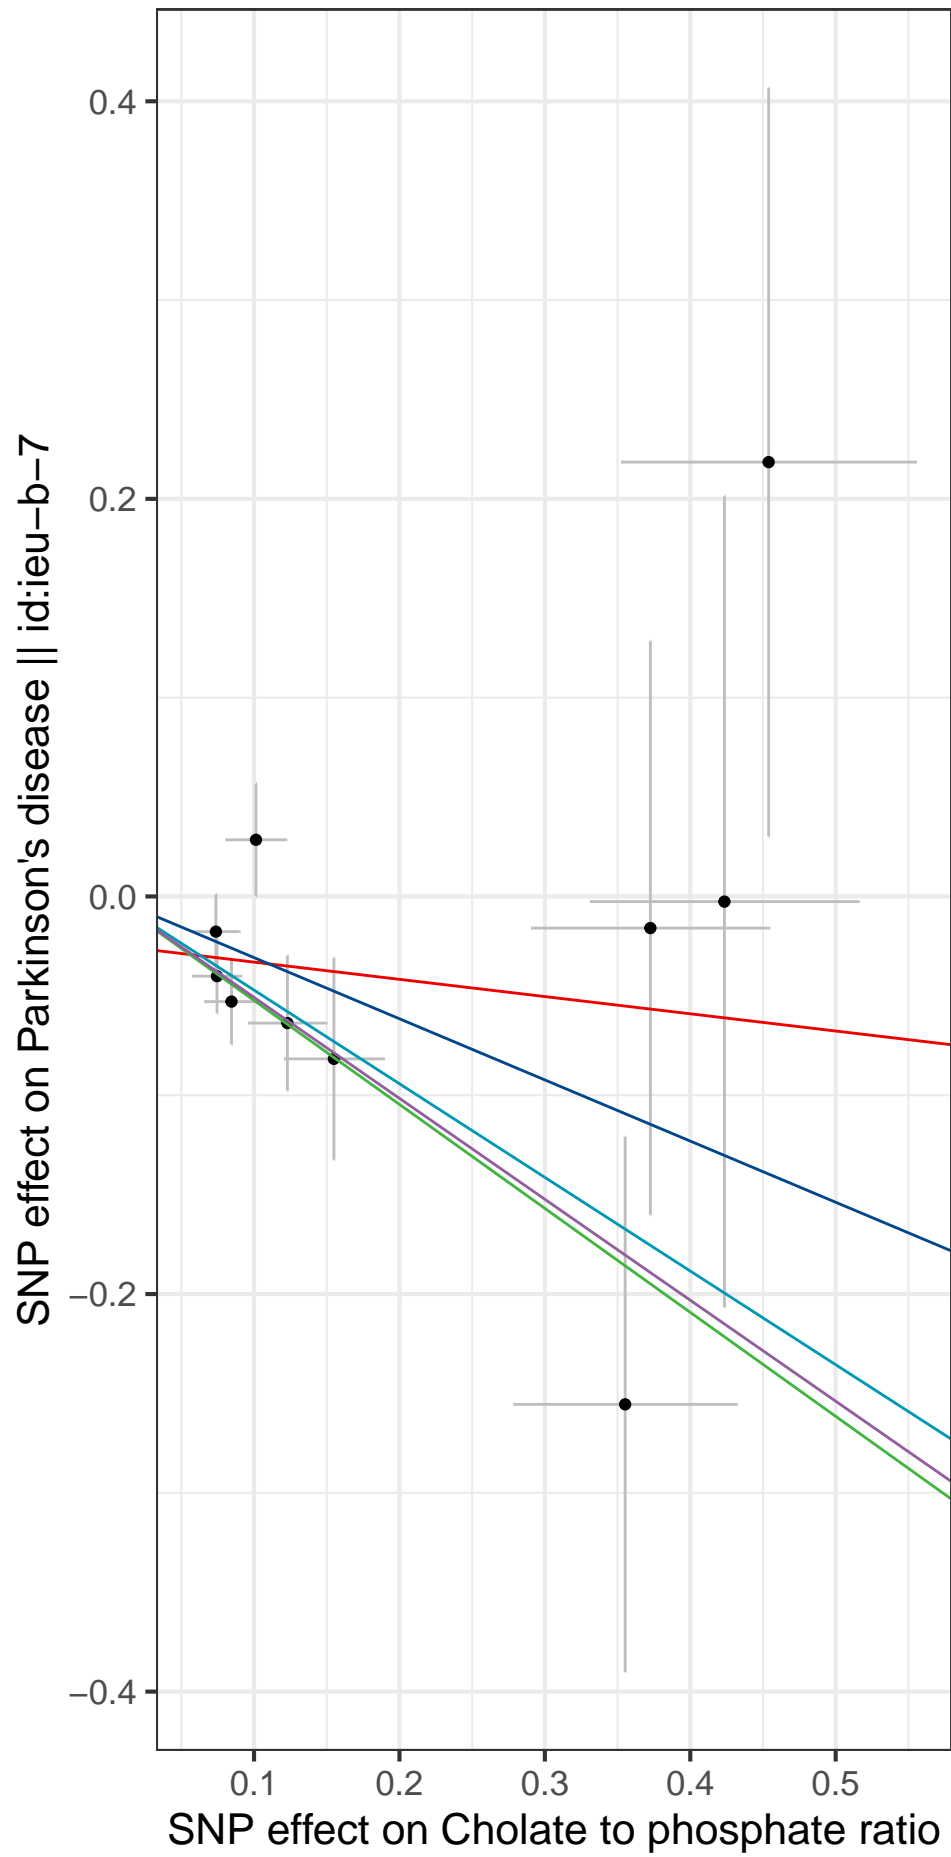

MR Test

- Inverse variance weighted
- MR Egger
- Simple mode
- Weighted median
- Weighted mode



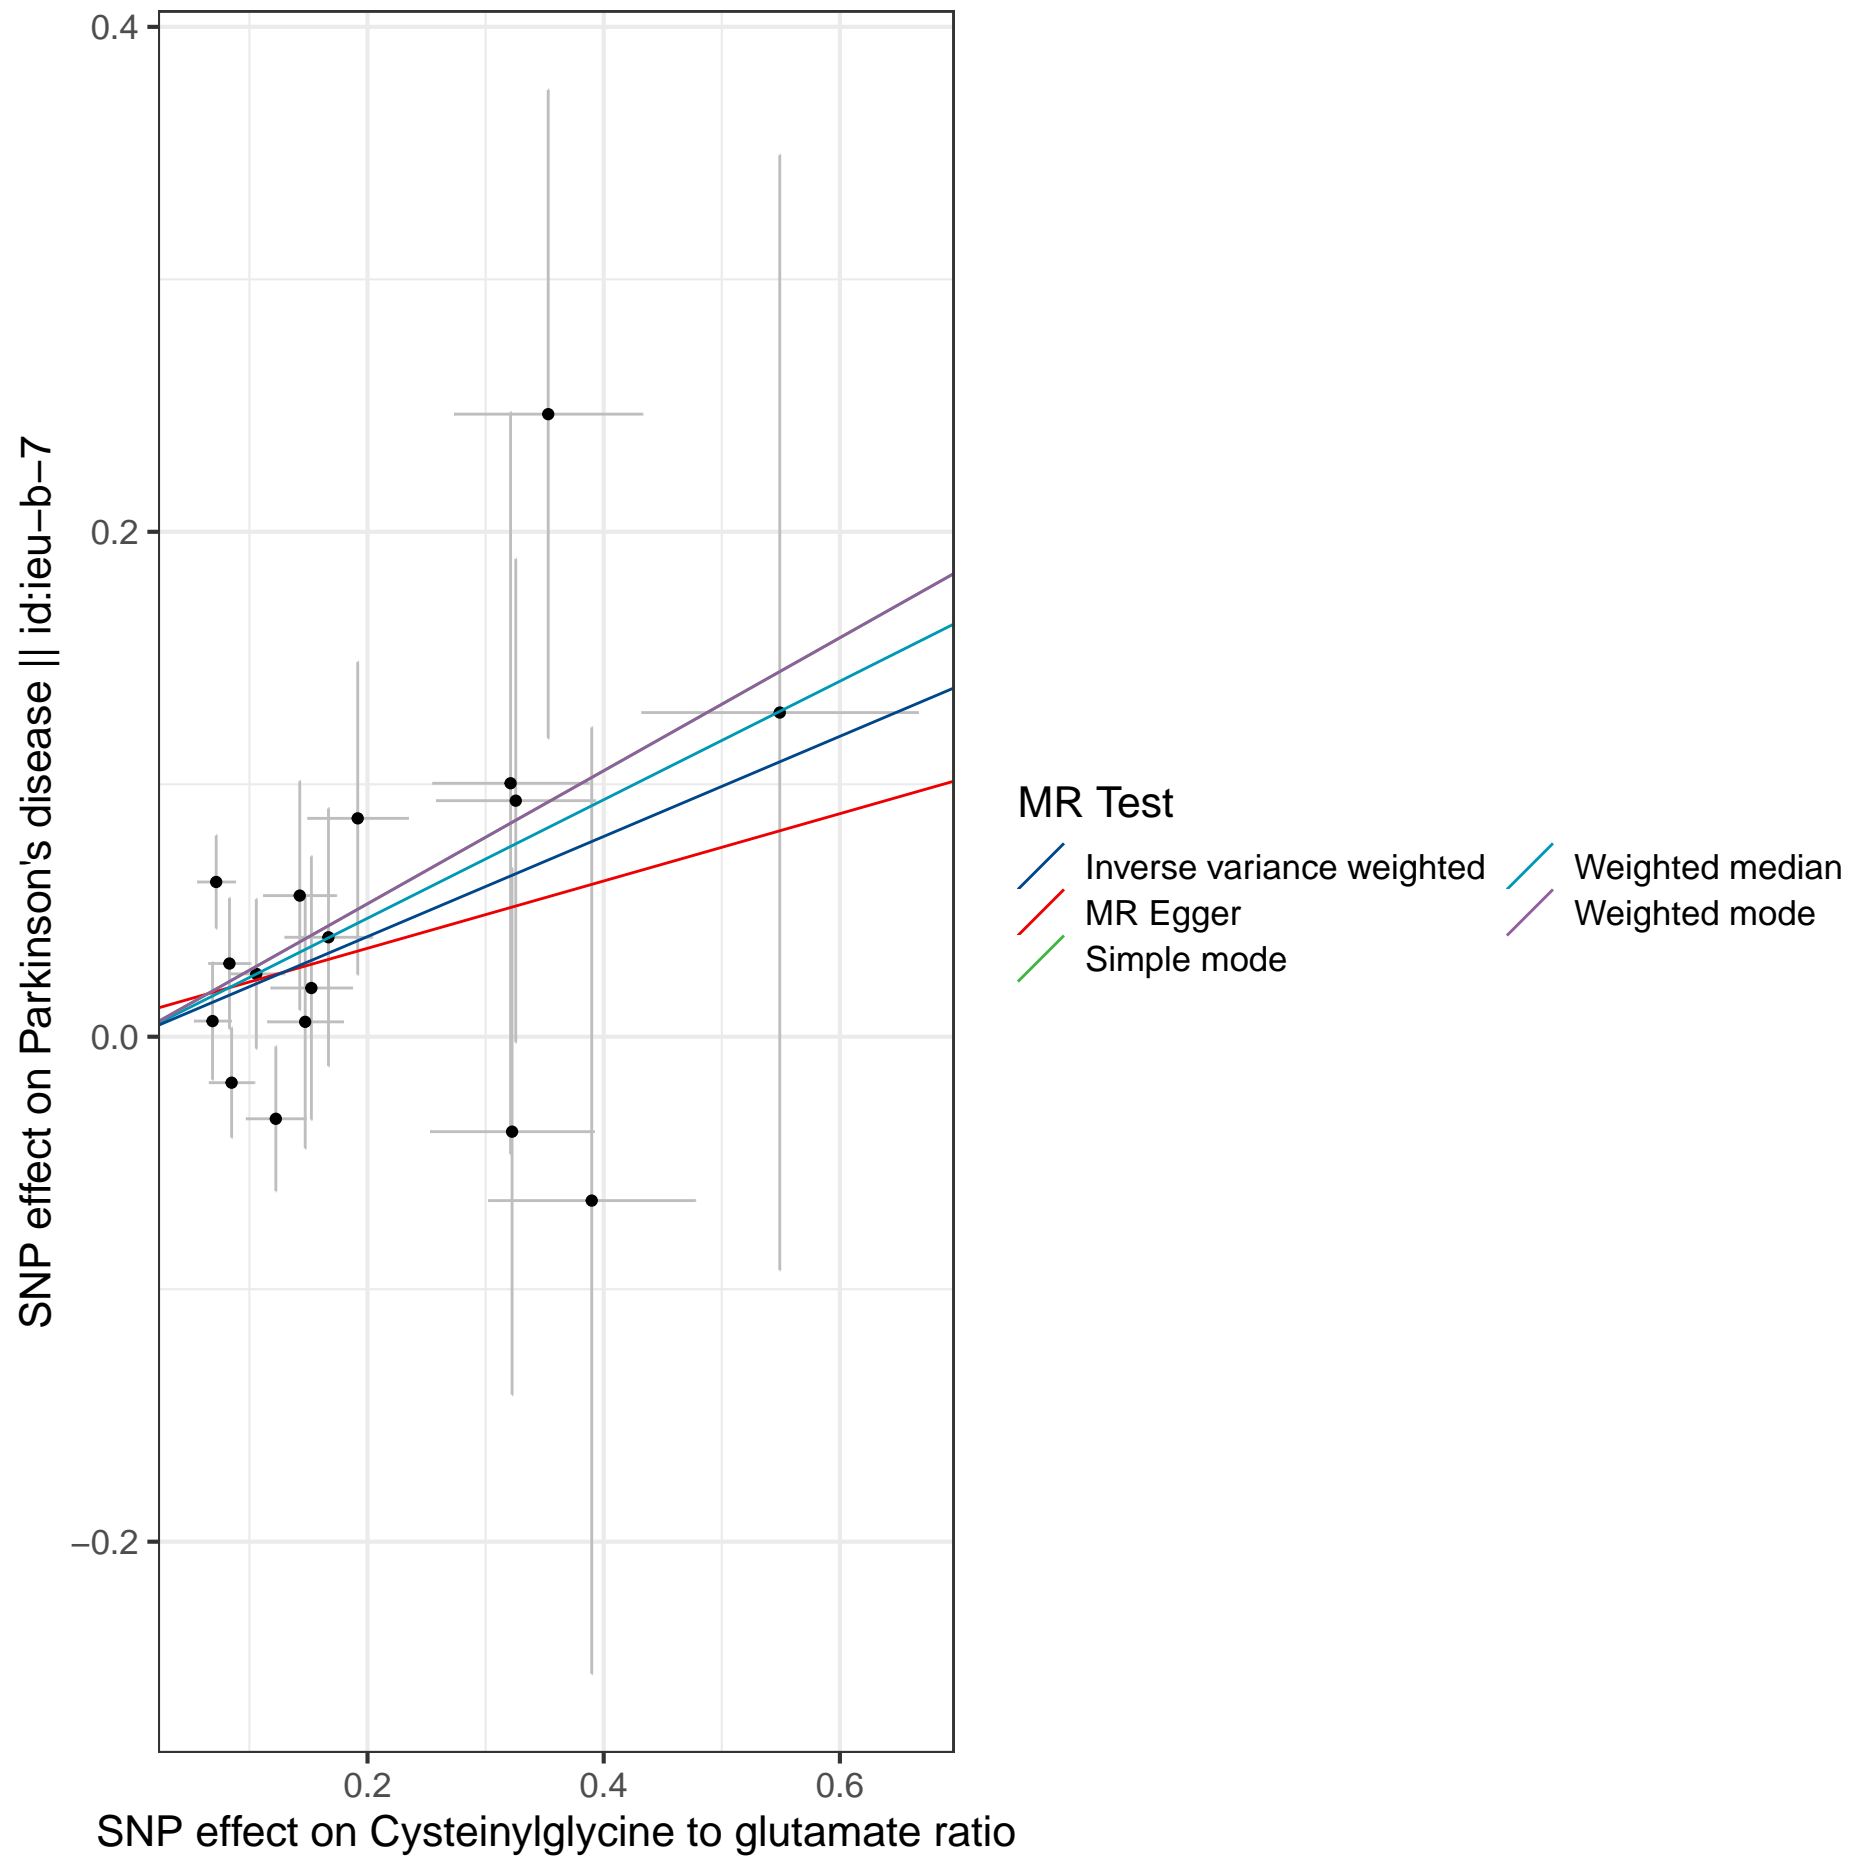

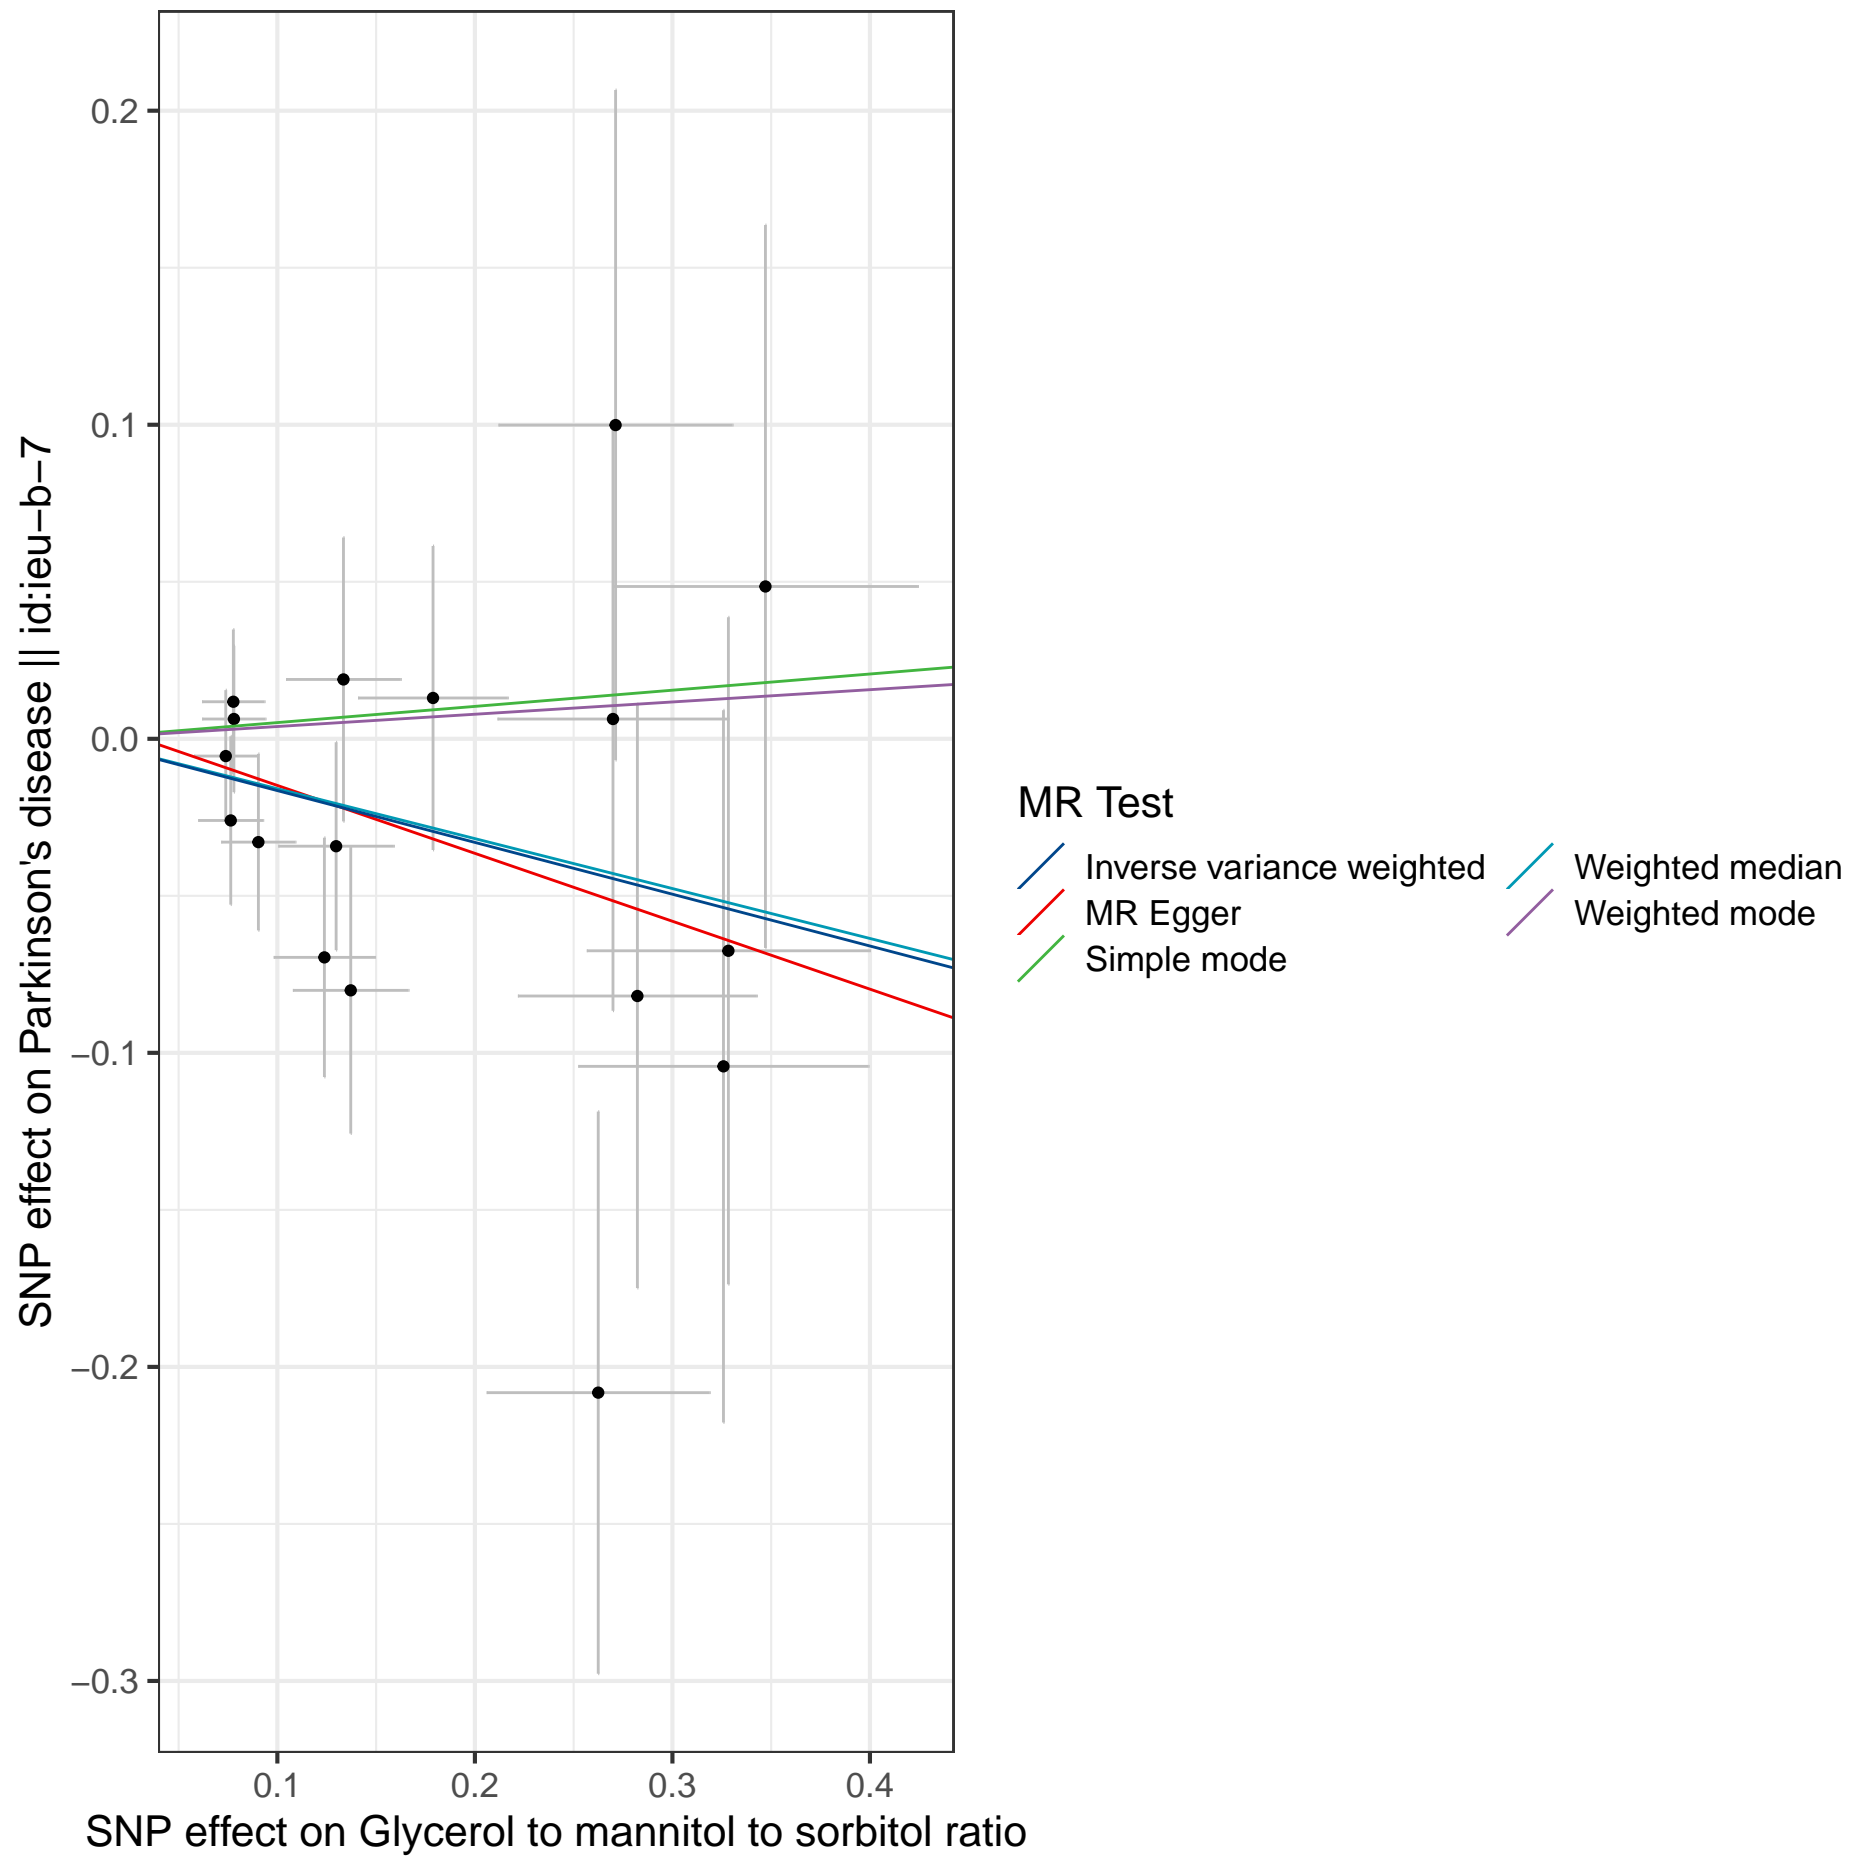

SNP effect on Parkinson's disease || id:ieu-b-7

SNP effect on Glycerol to mannitol to sorbitol ratio

MR Test

- Inverse variance weighted
- MR Egger
- Simple mode
- Weighted median
- Weighted mode

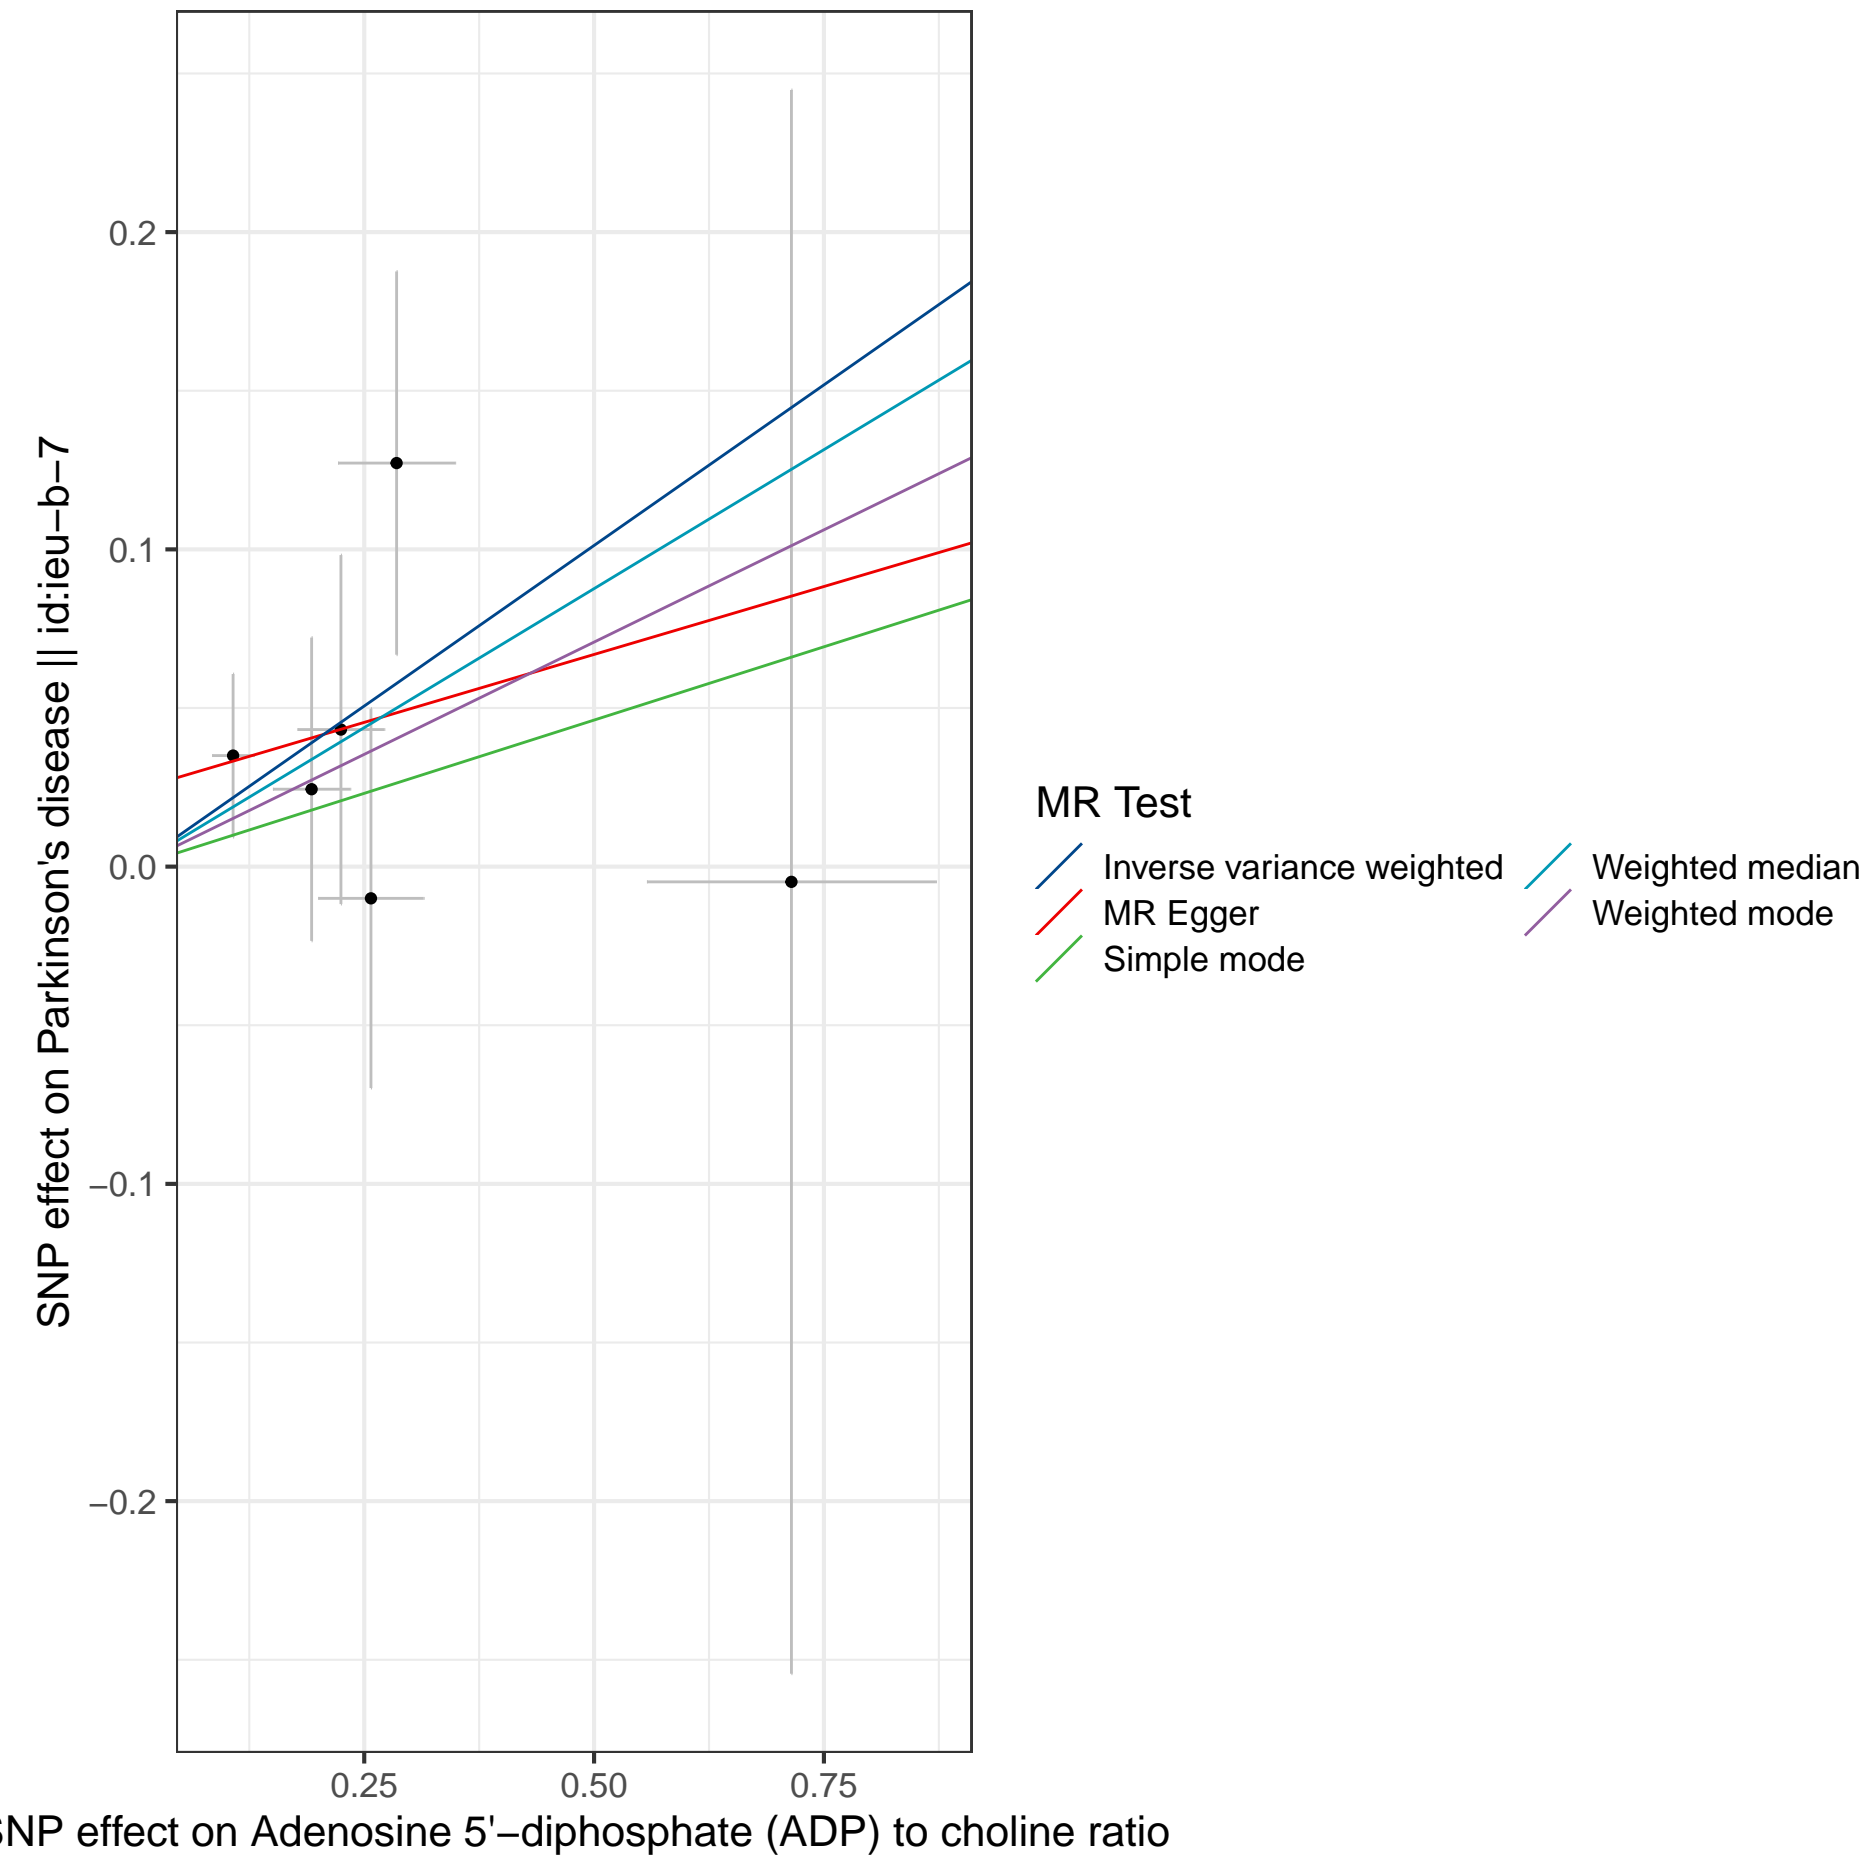

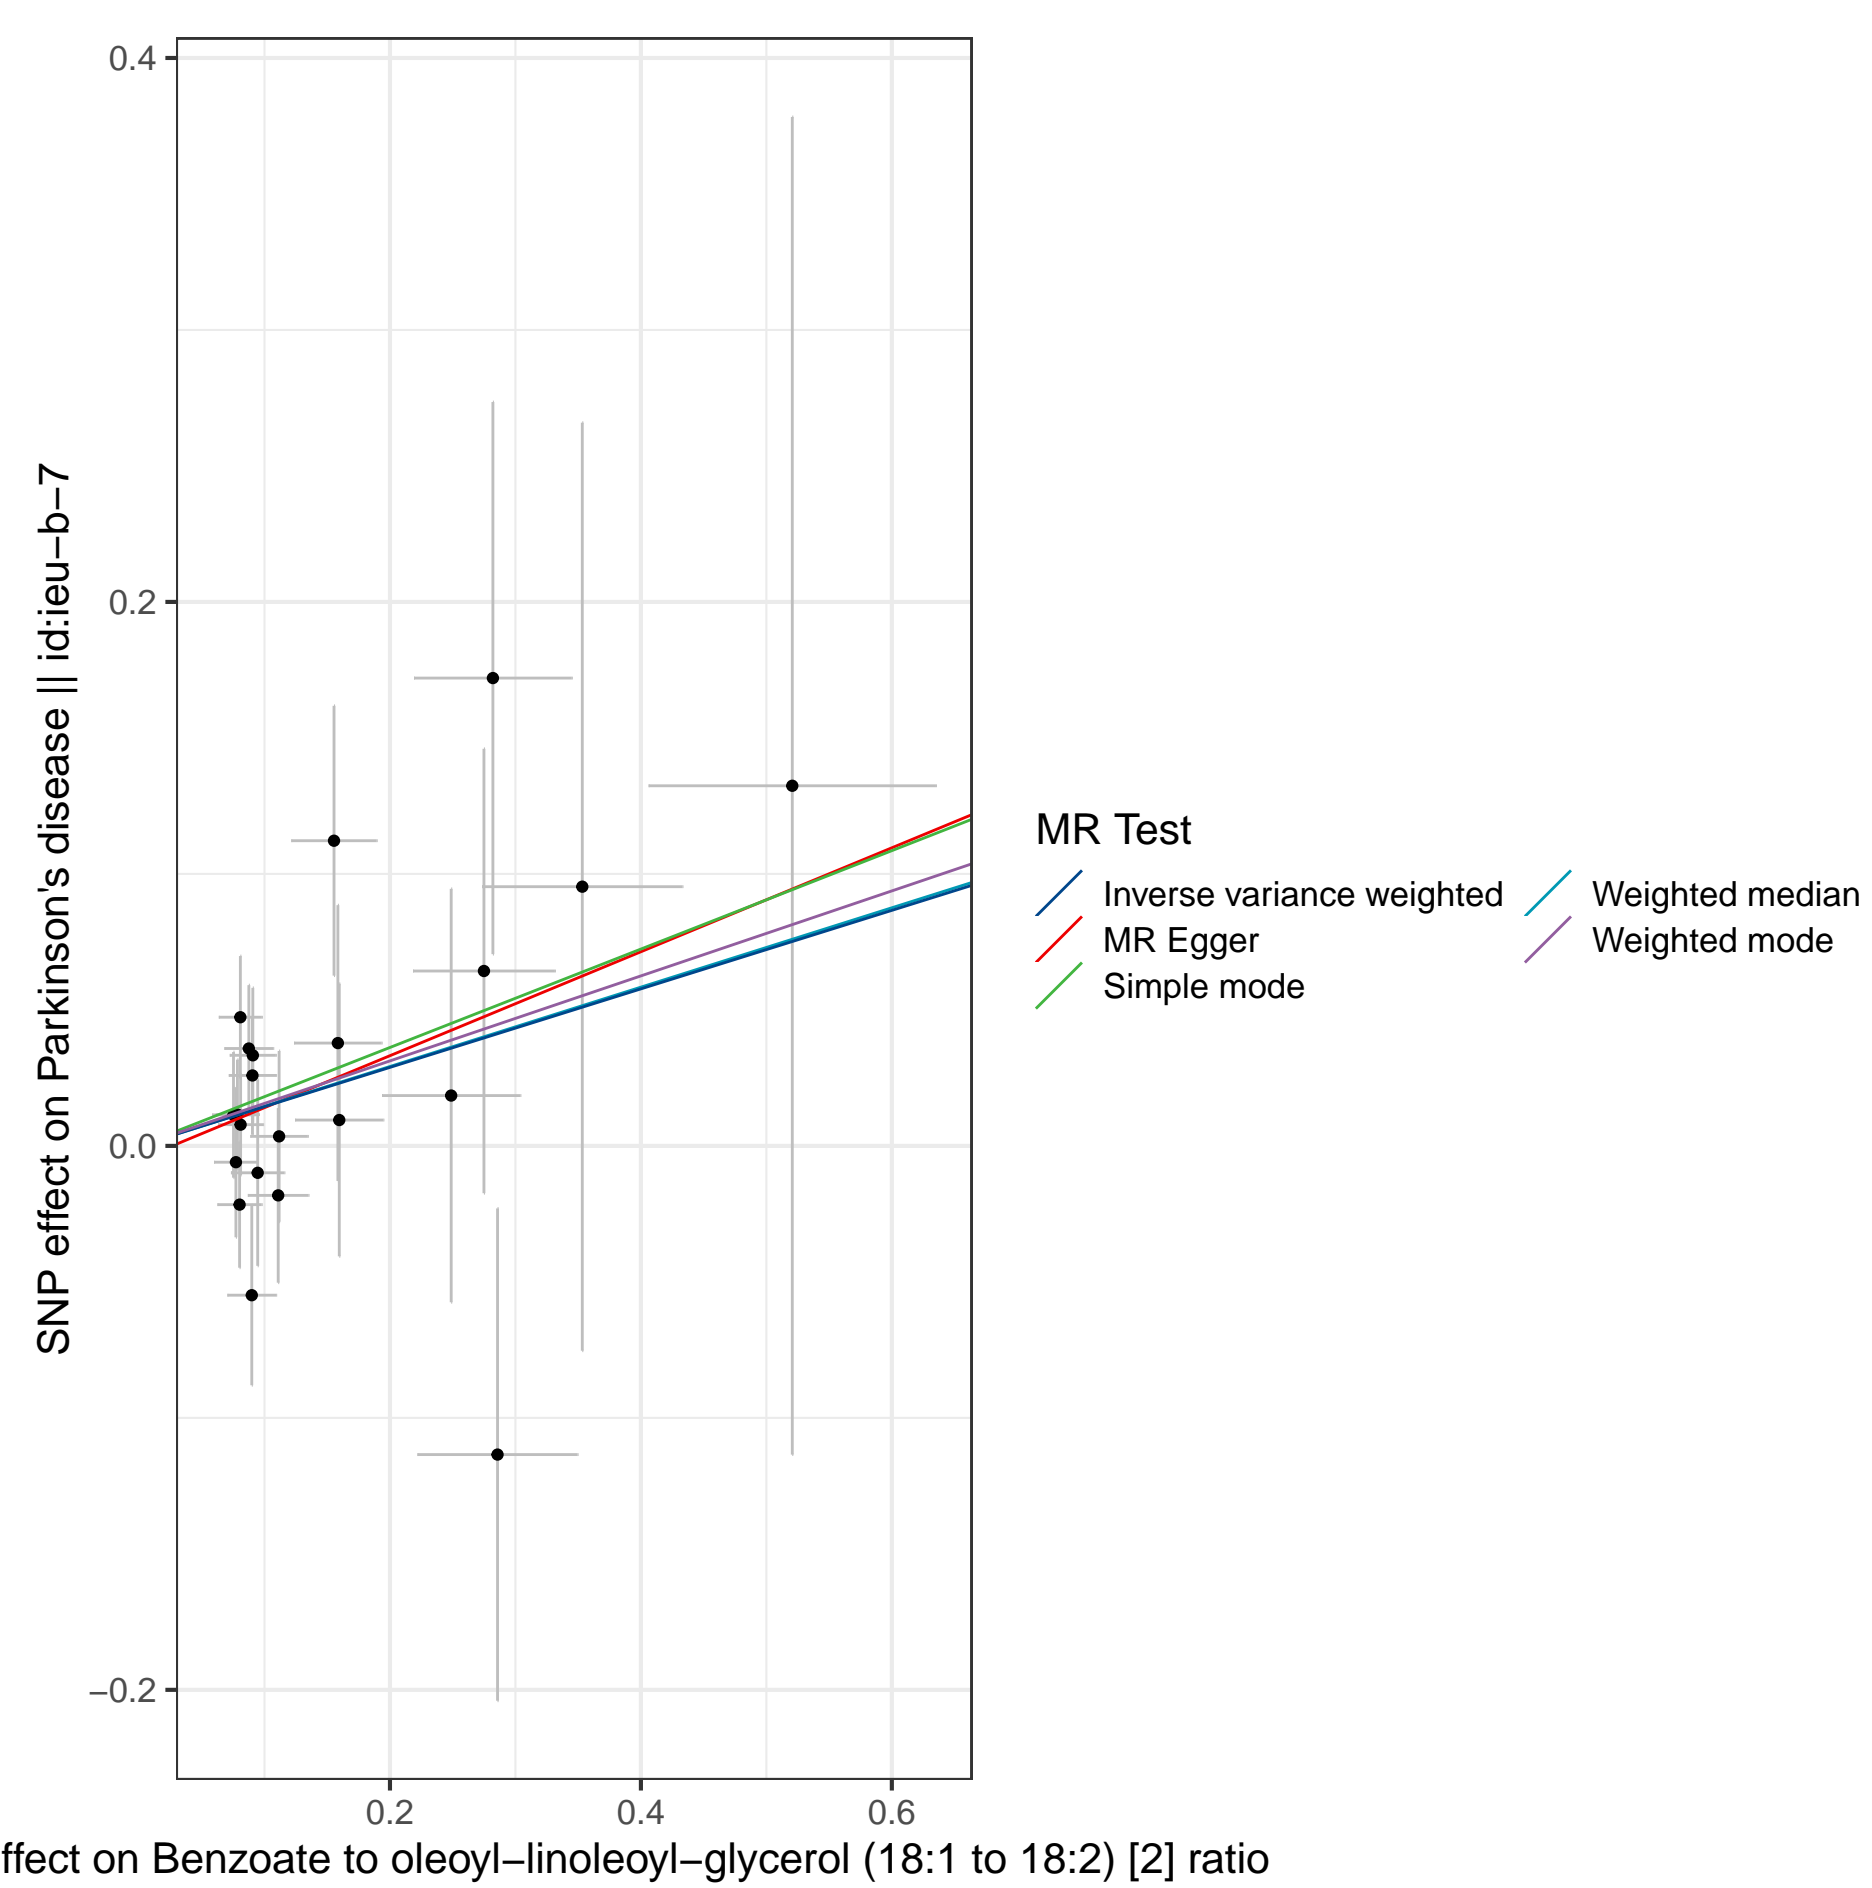

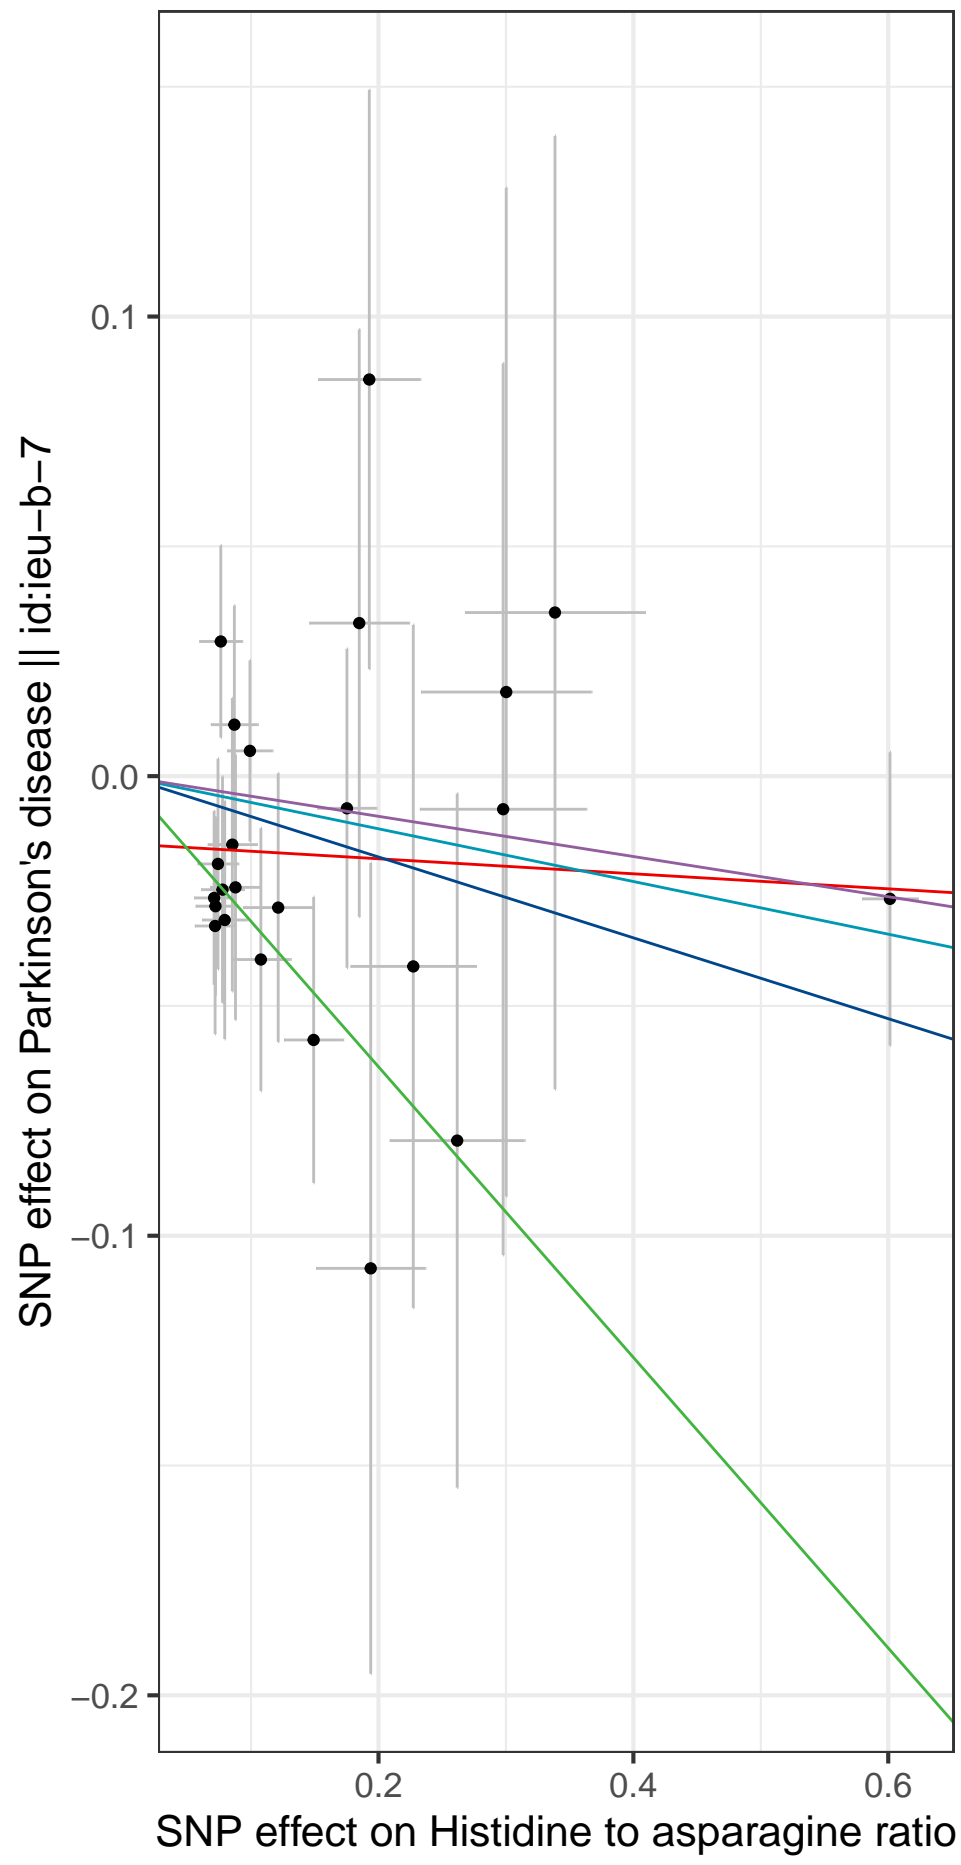

- MR Test
- Inverse variance weighted
  - MR Egger
  - Simple mode
  - Weighted median
  - Weighted mode

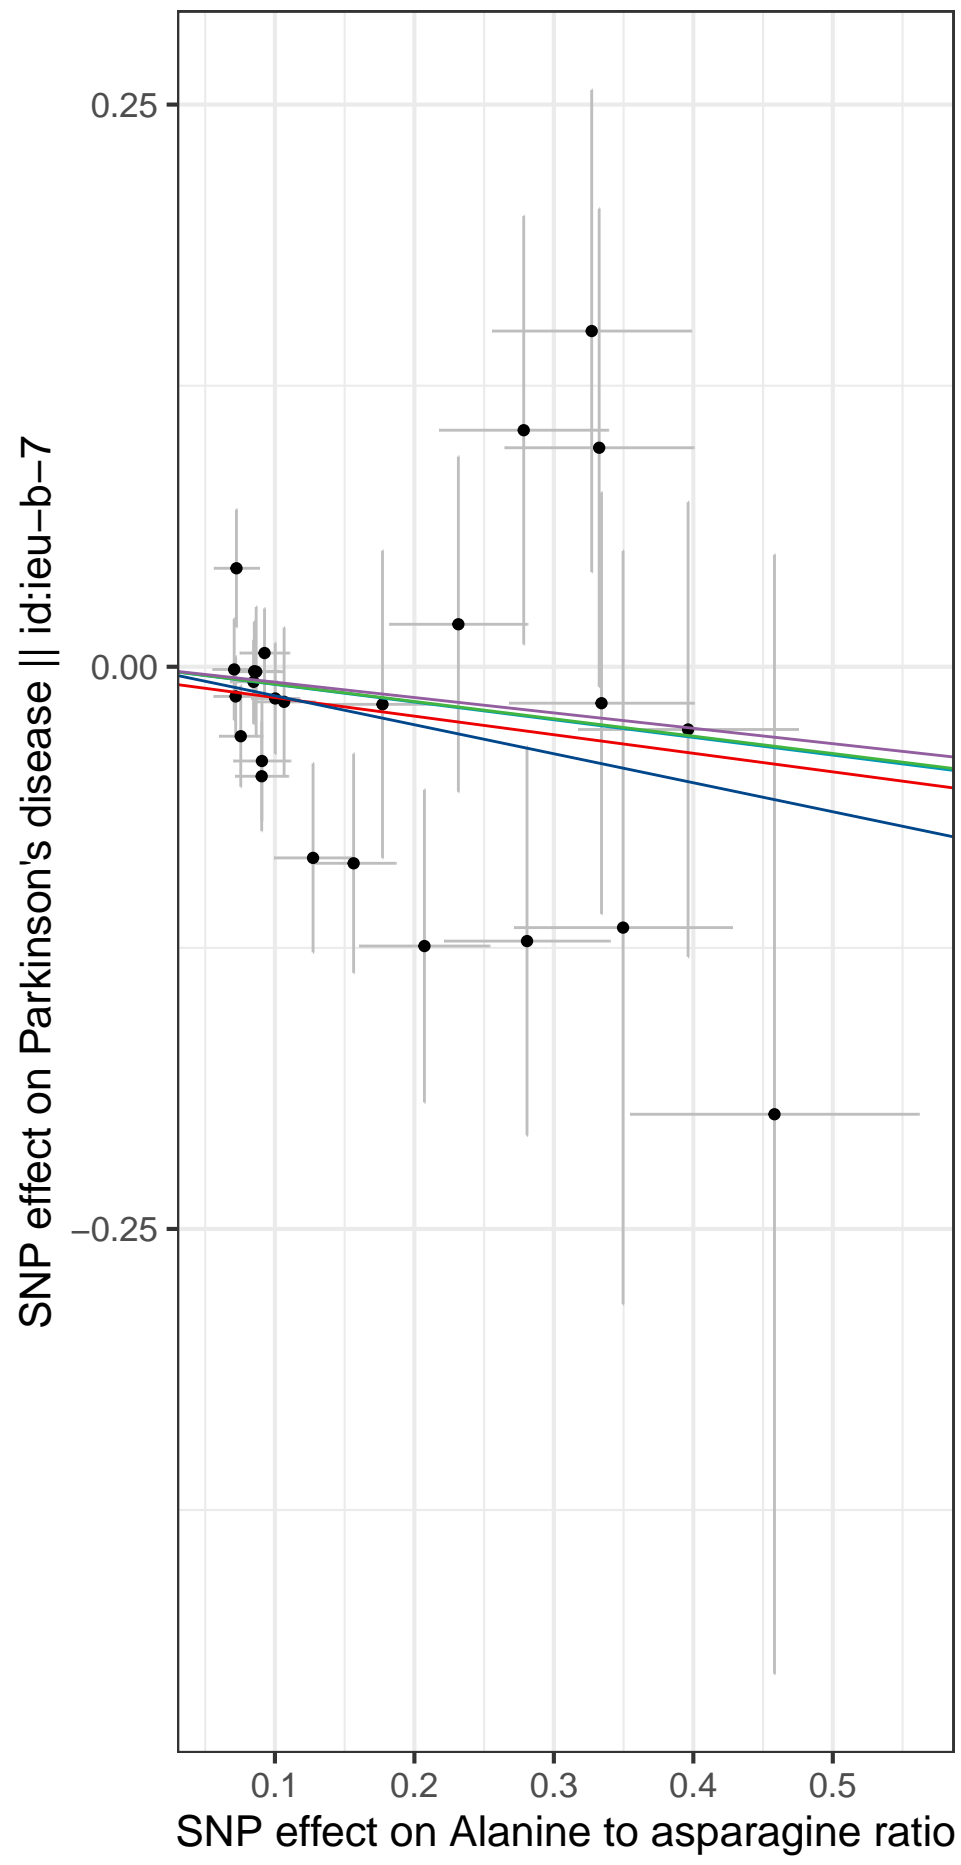

MR Test

- Inverse variance weighted
- MR Egger
- Simple mode
- Weighted median
- Weighted mode

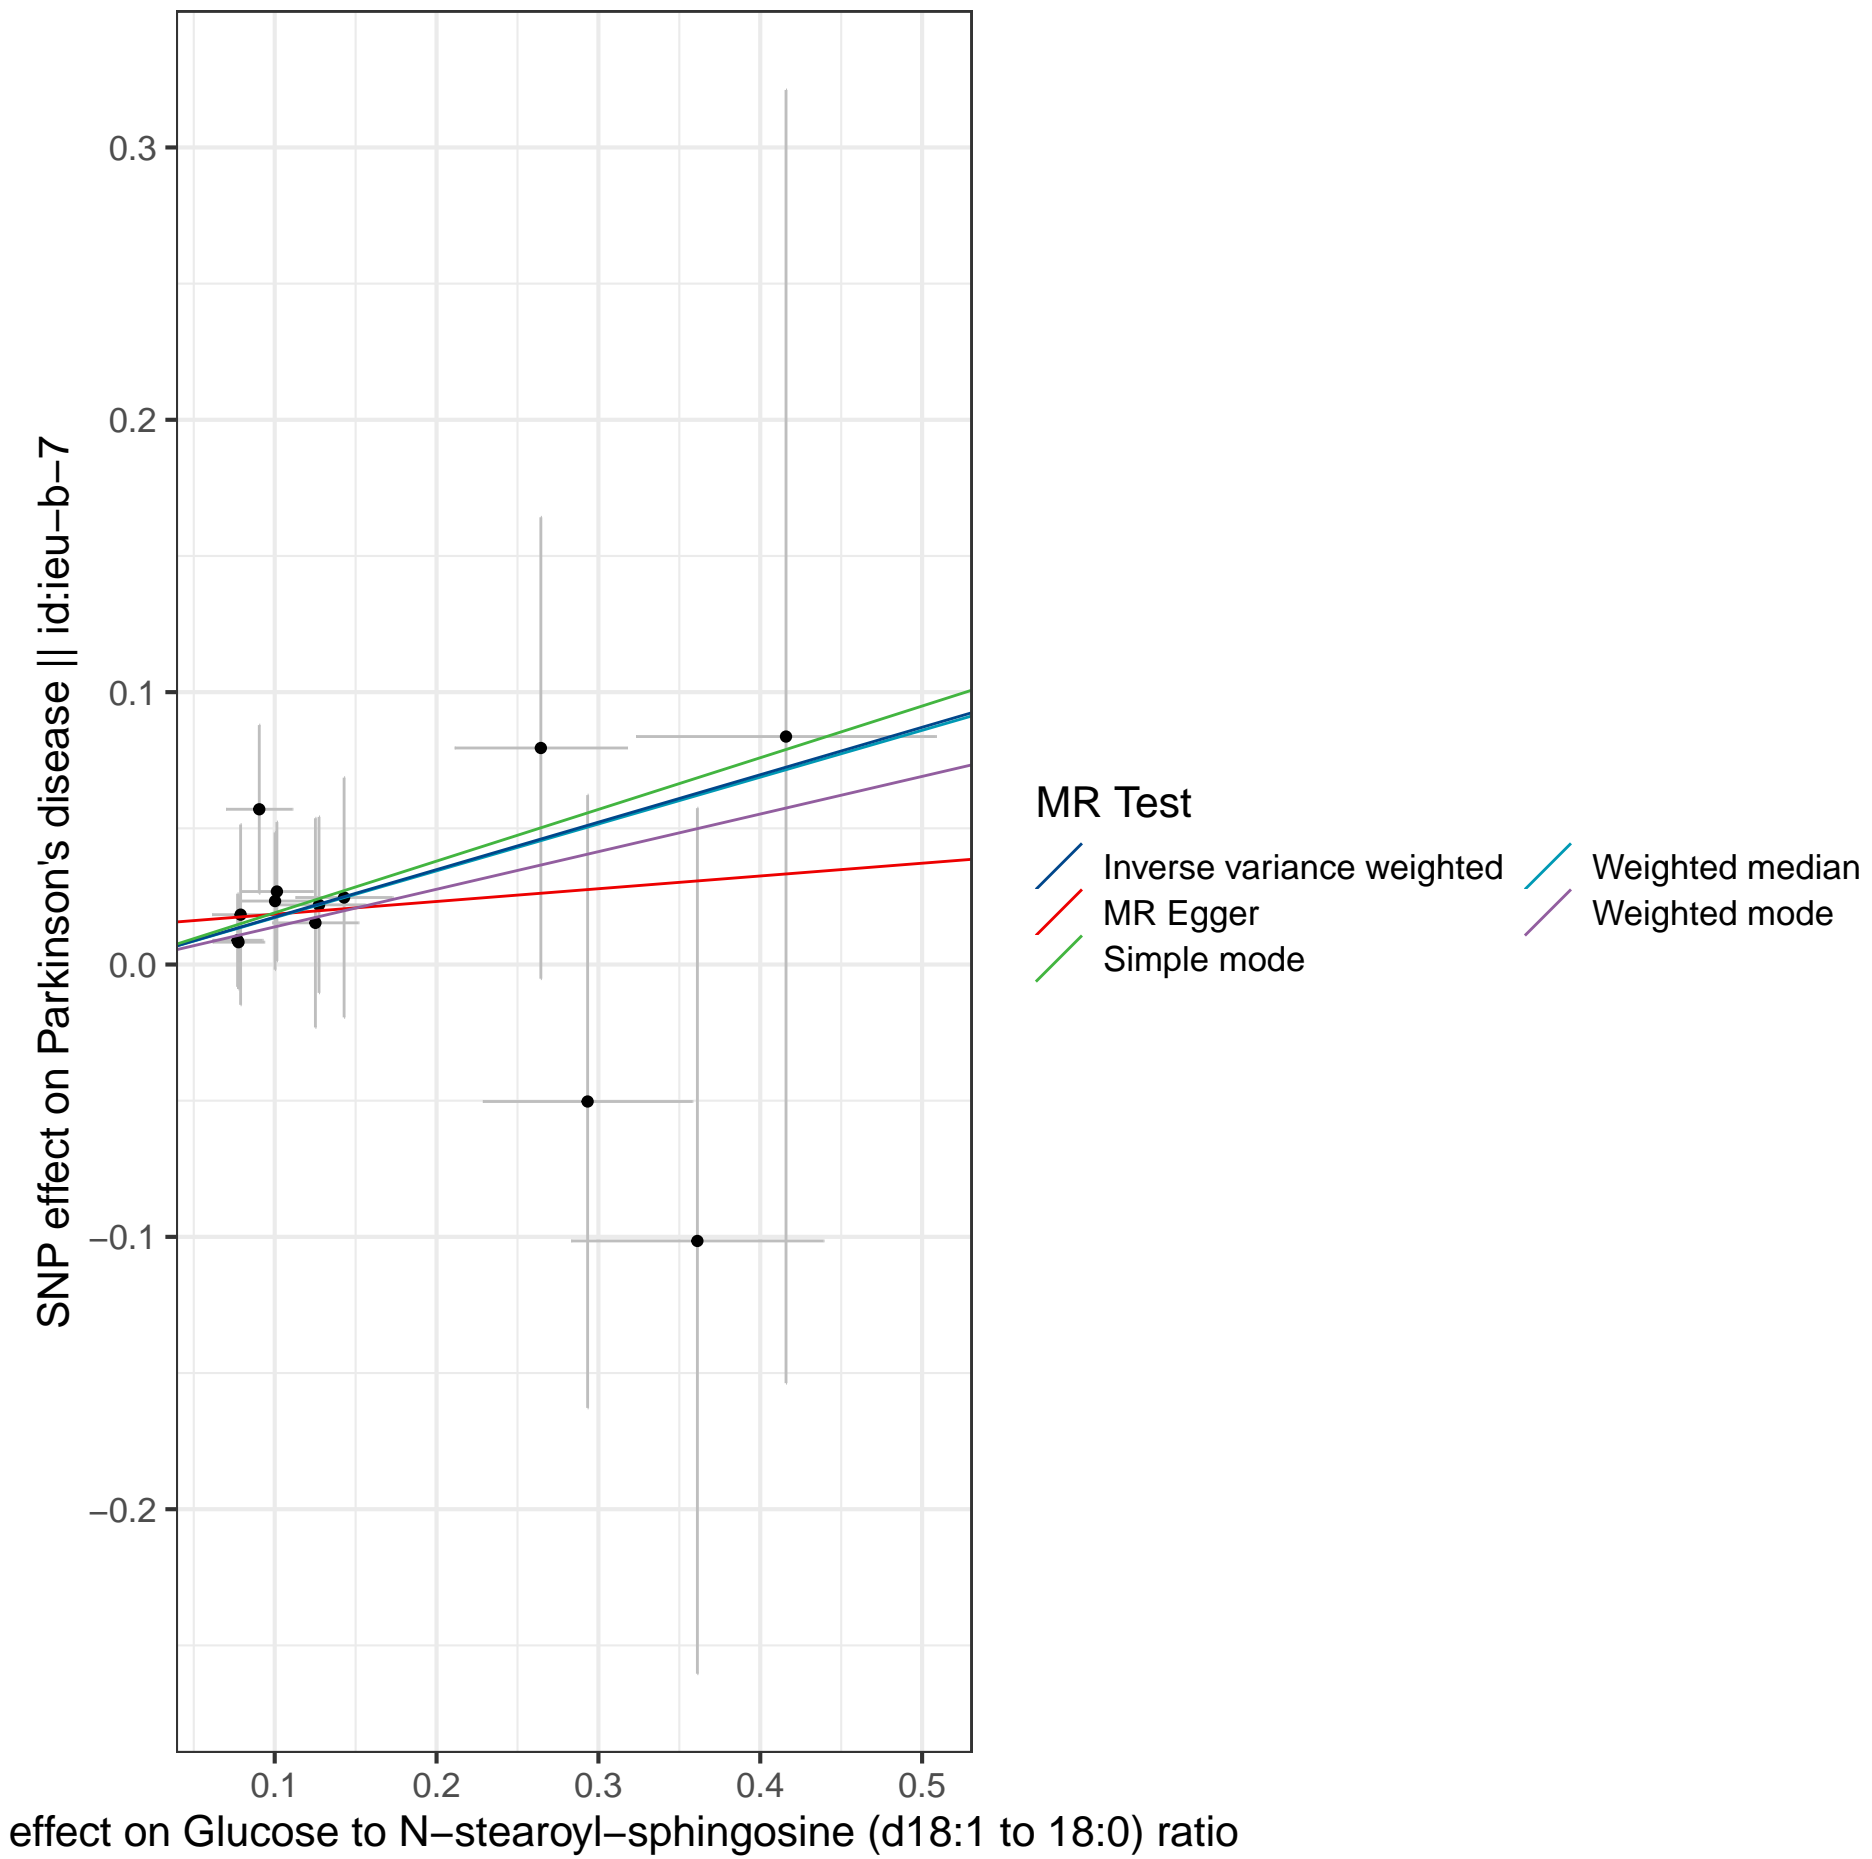

Supplement: Supplementary file [file media-6.pdf]
