# Supplementary material for: Cerebrospinal Fluid and Plasma Metabolites with Parkinson’s Disease: A Mendelian Randomization Study
Source: bioRxiv or medRxiv preprint supplement (doi:10.1101/2024.07.19.24310687), 2024-07-19

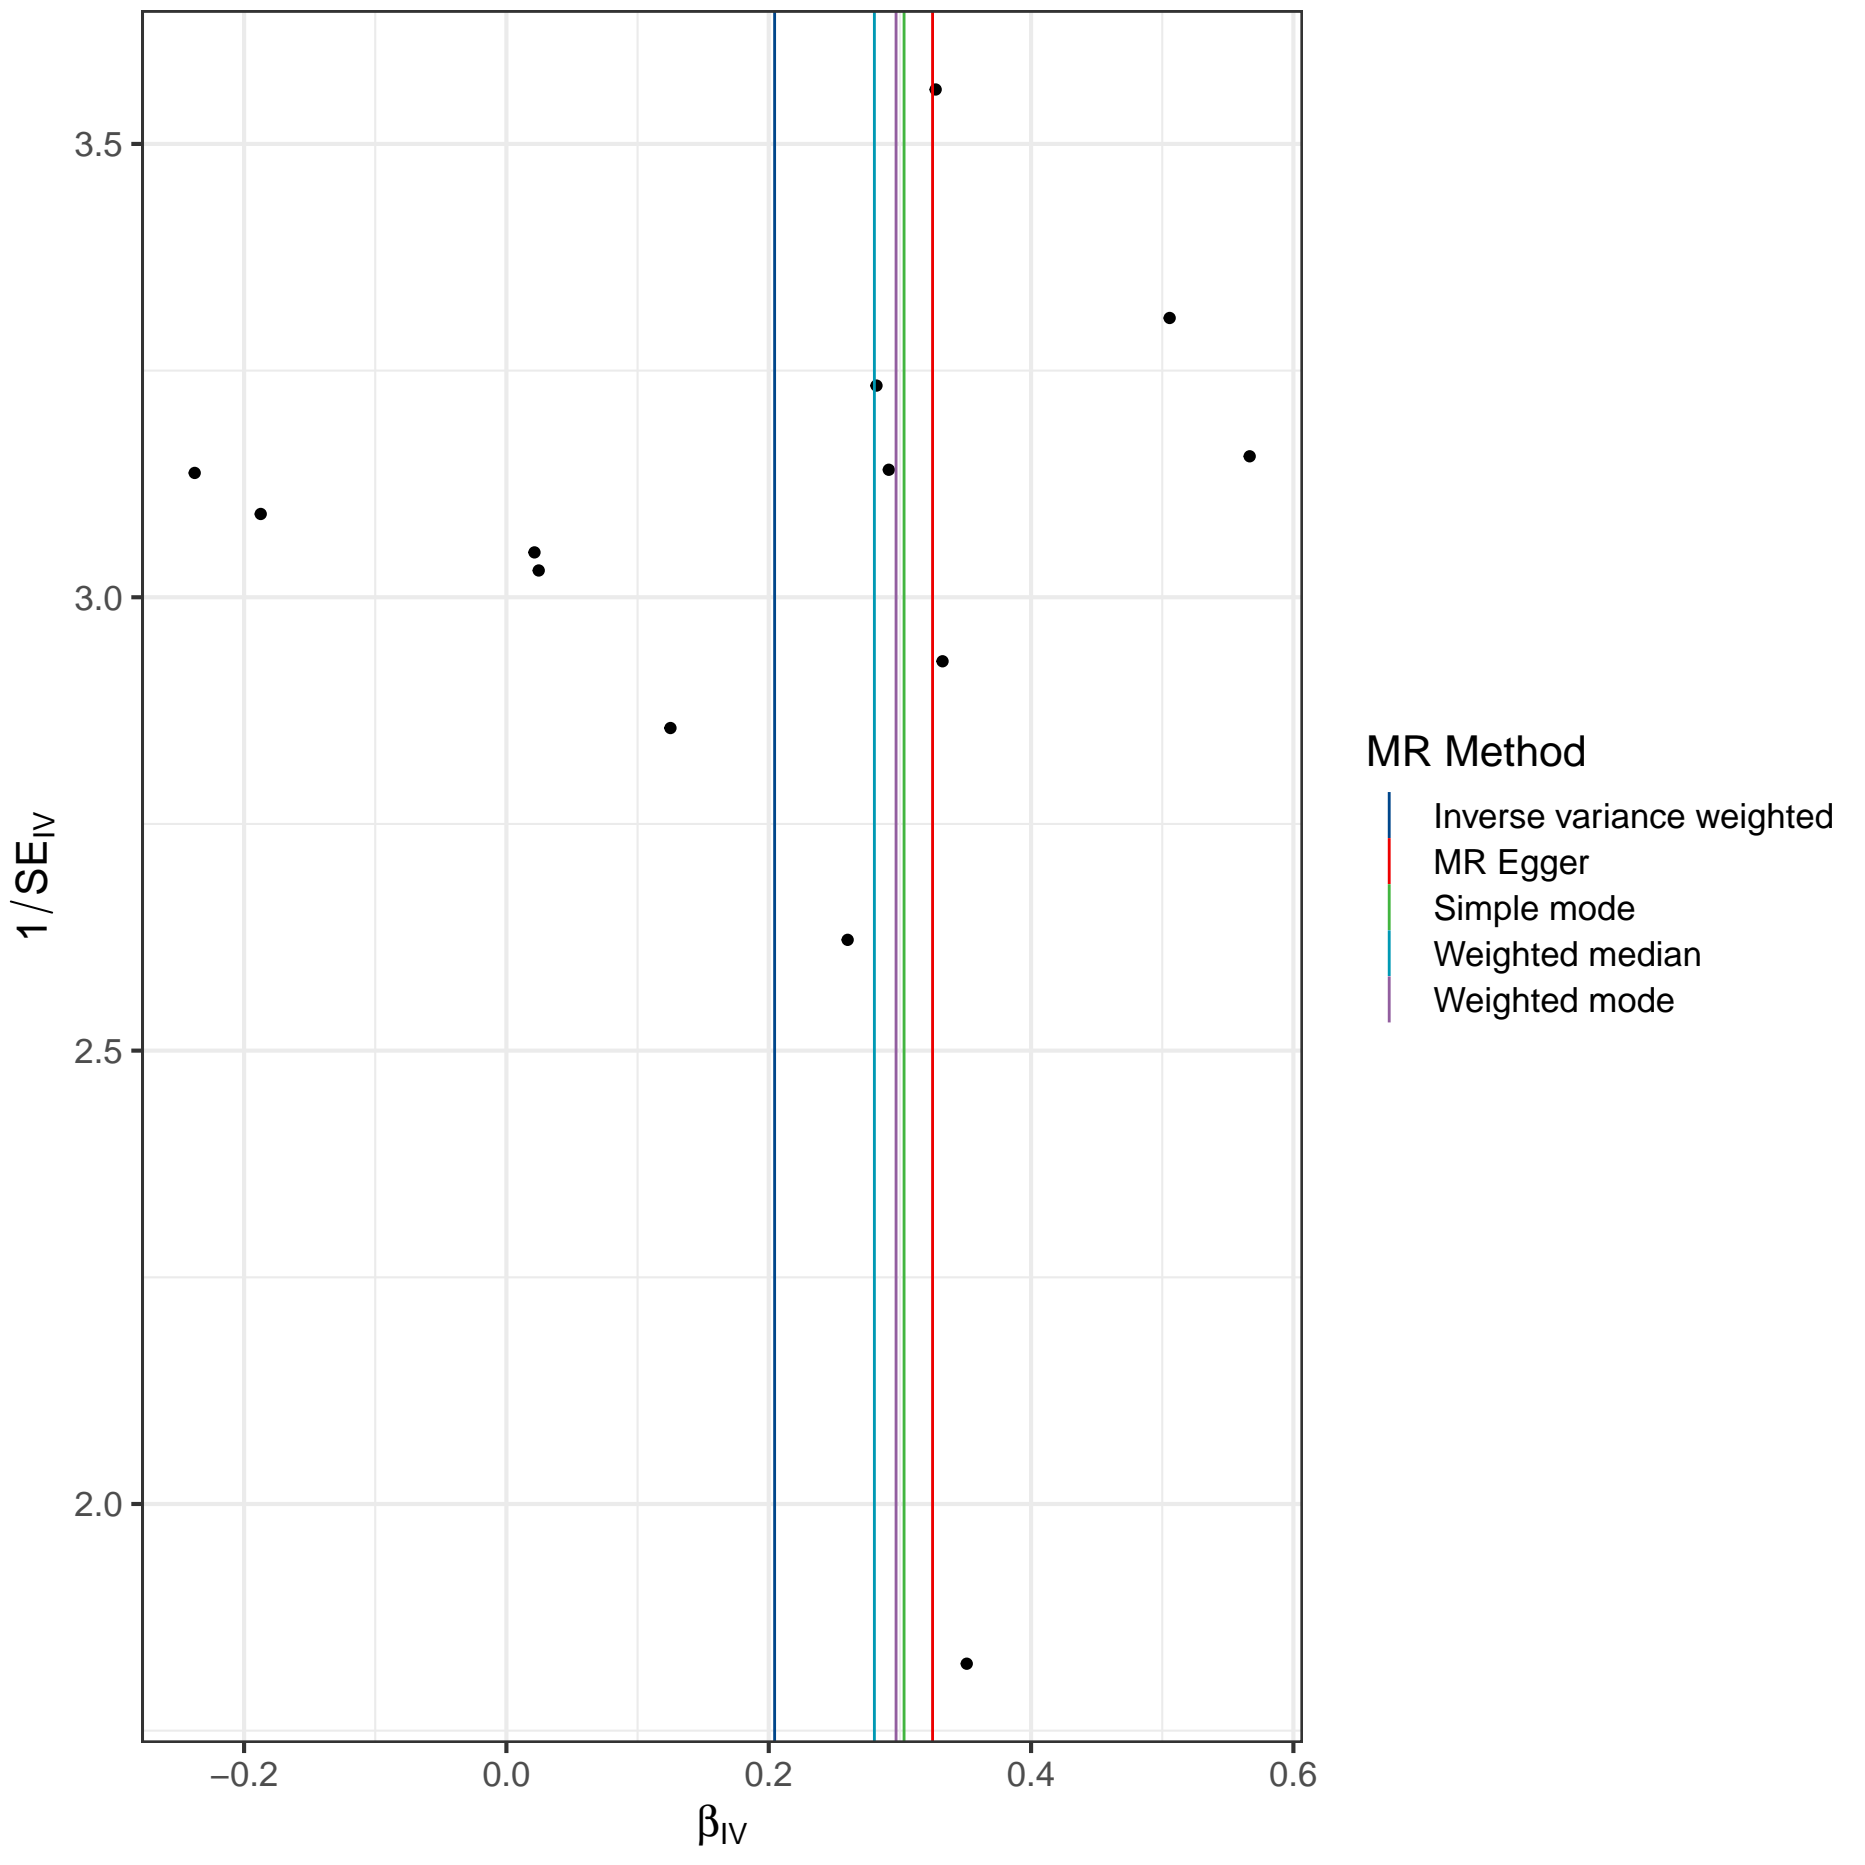

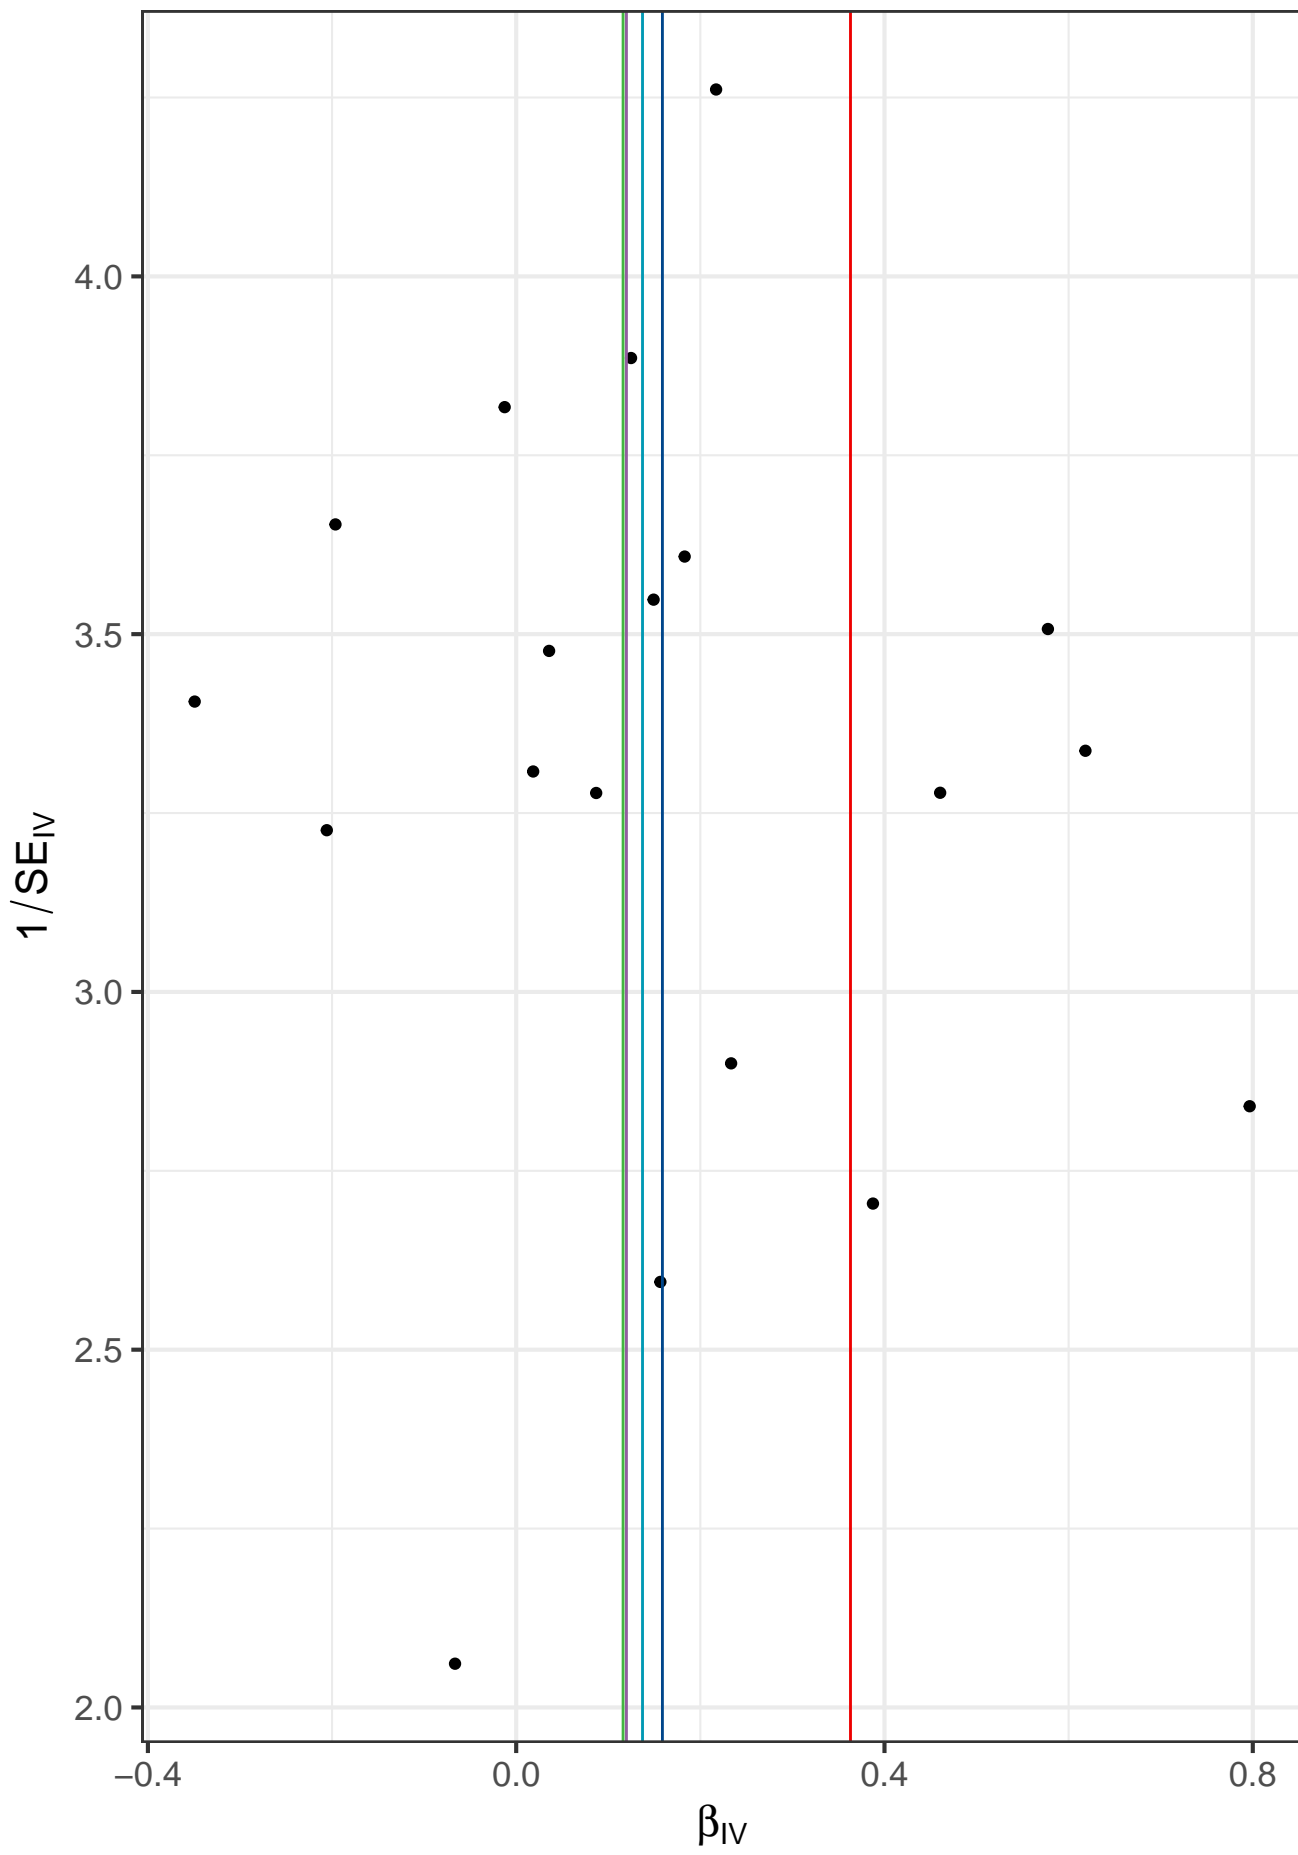

- MR Method
- Inverse variance weighted
  - MR Egger
  - Simple mode
  - Weighted median
  - Weighted mode

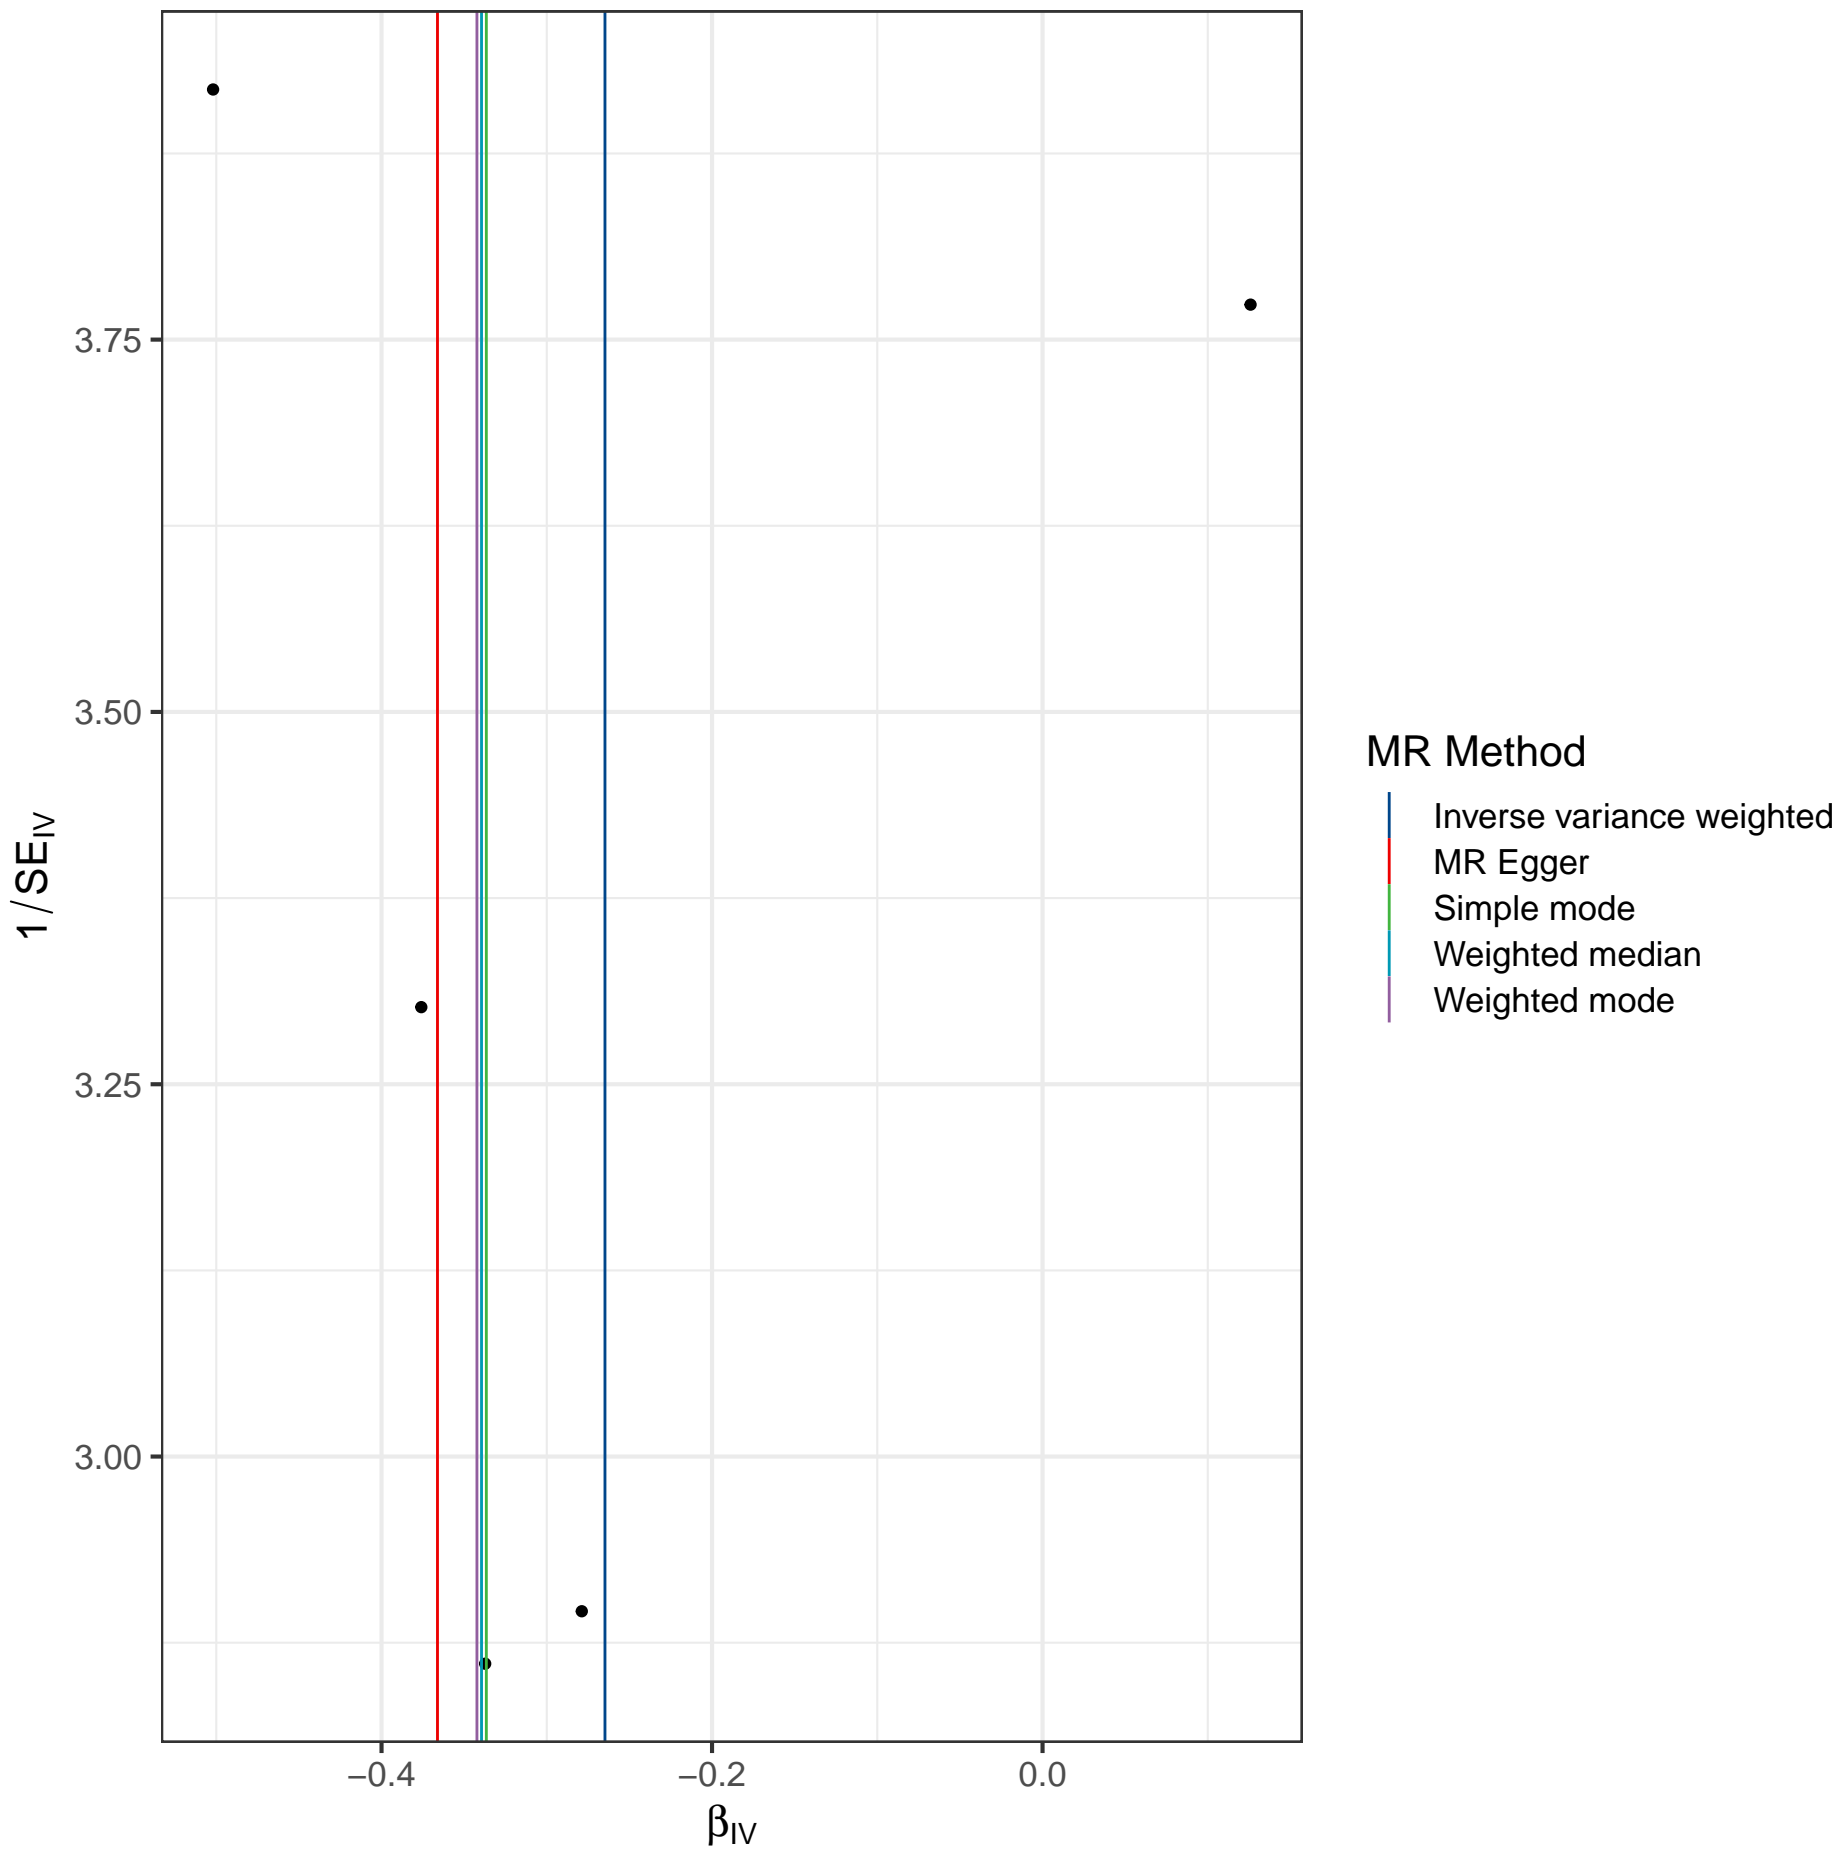

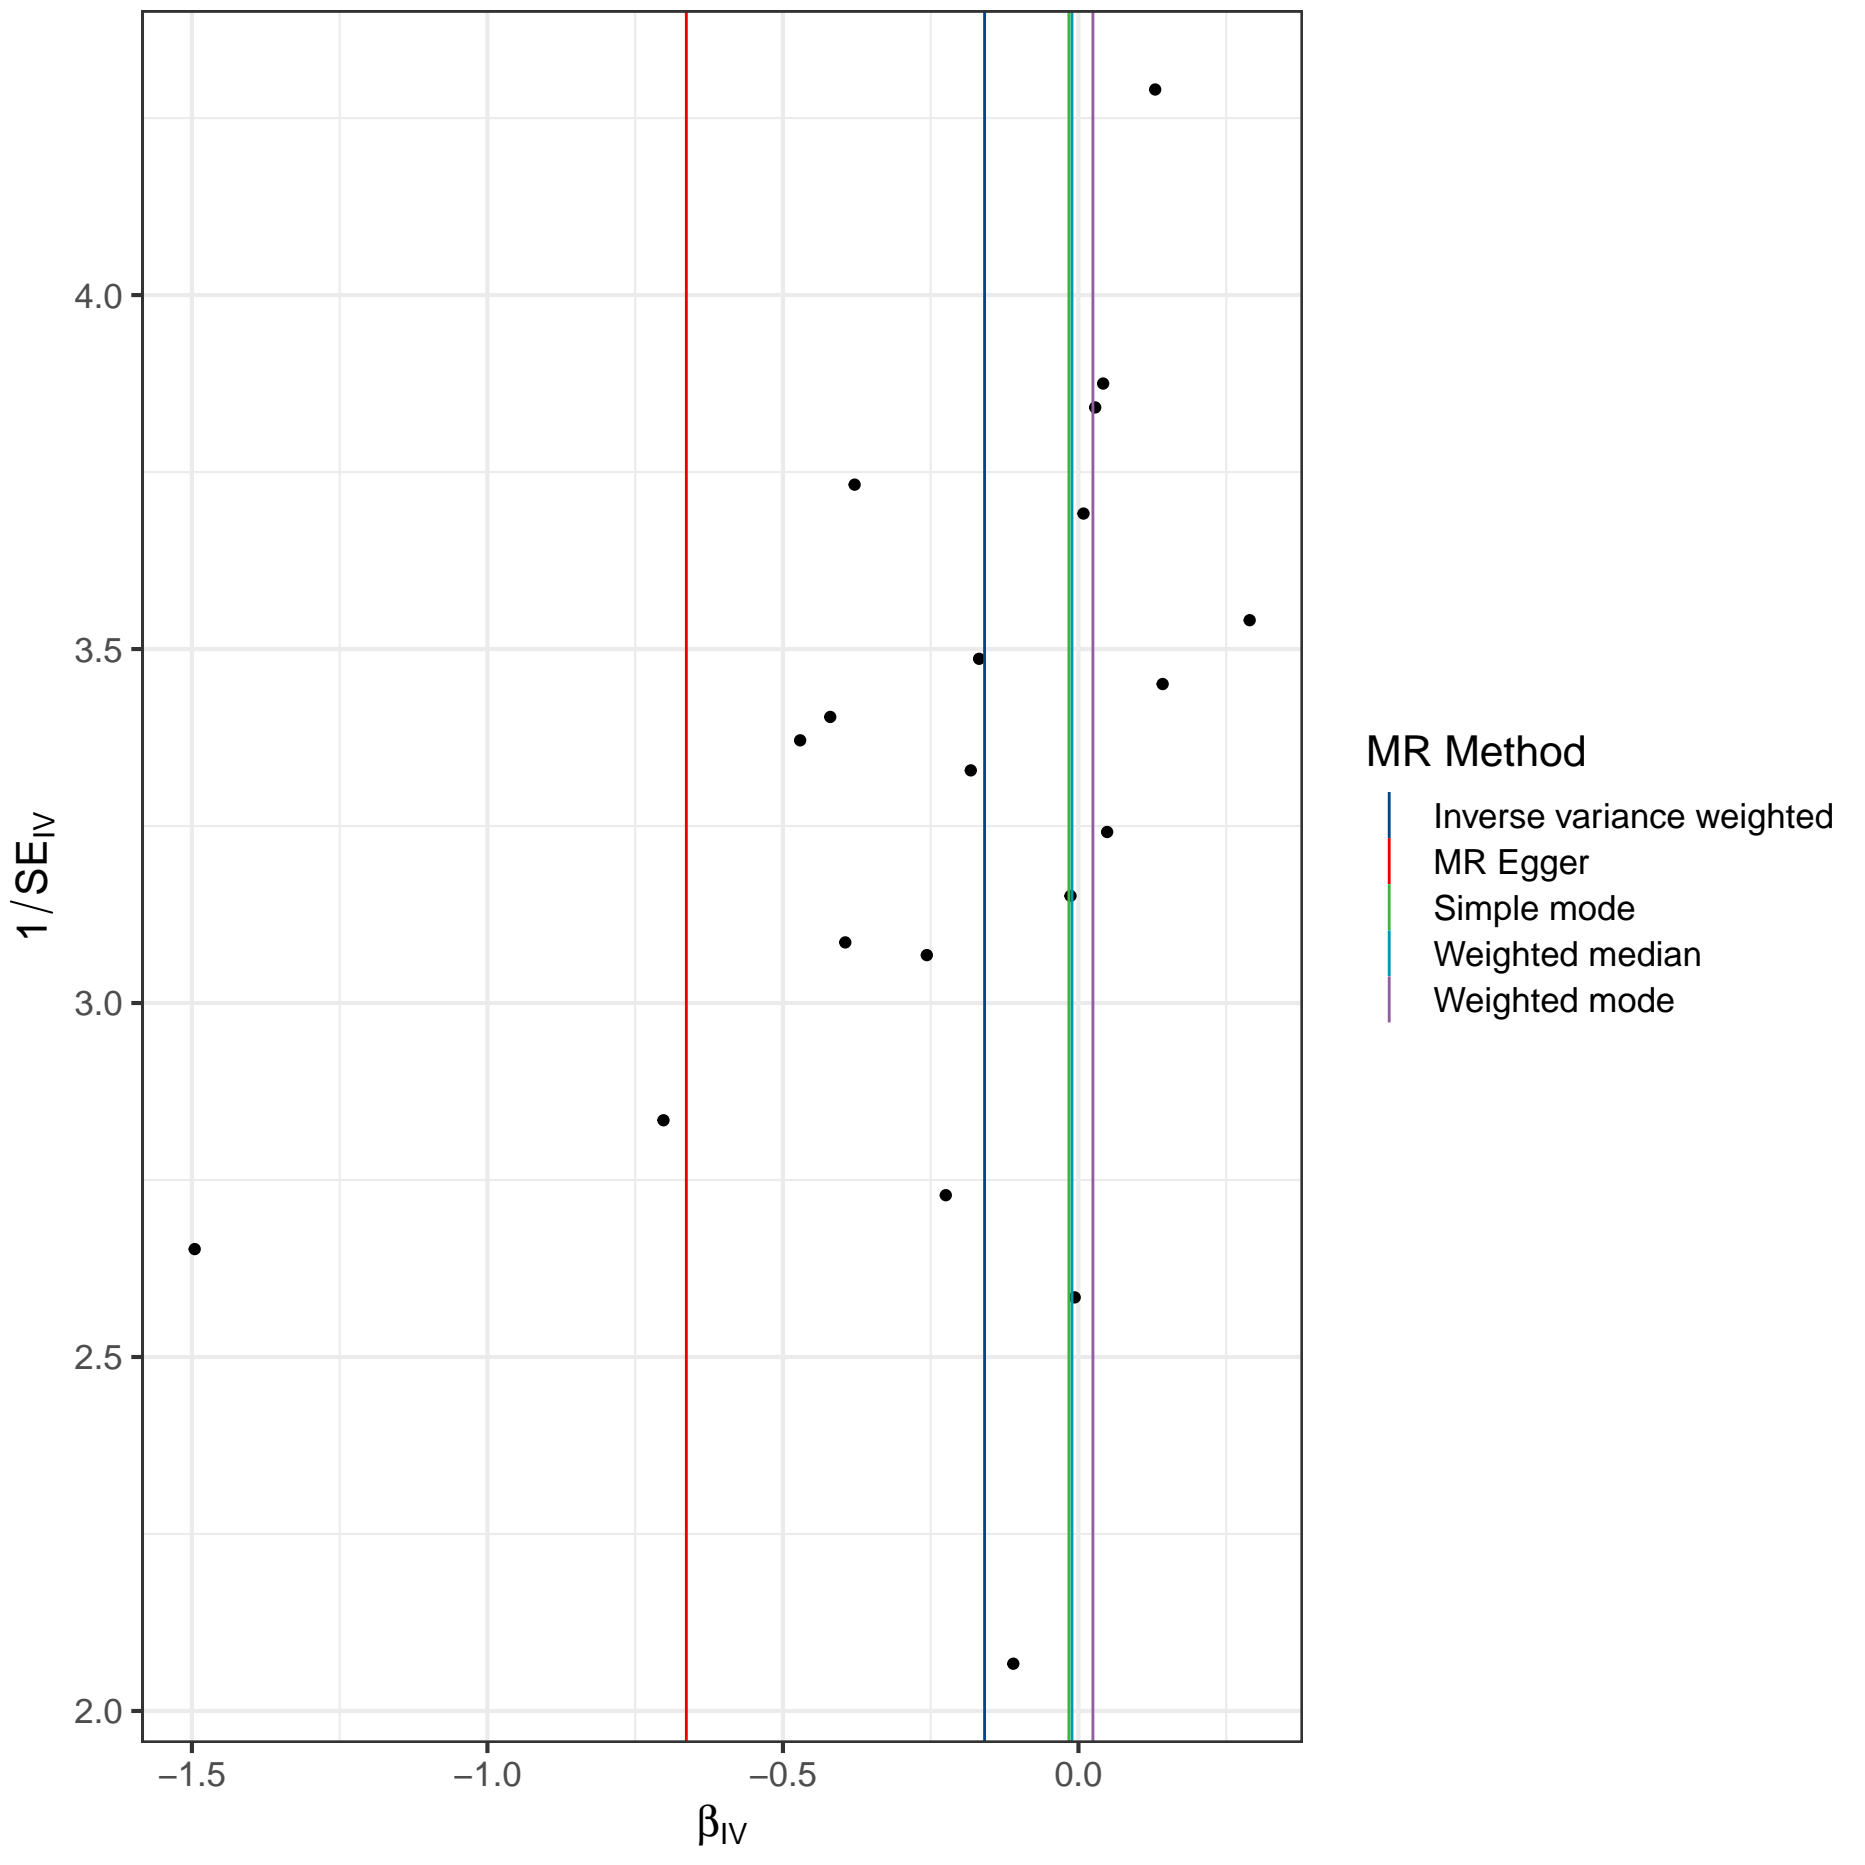

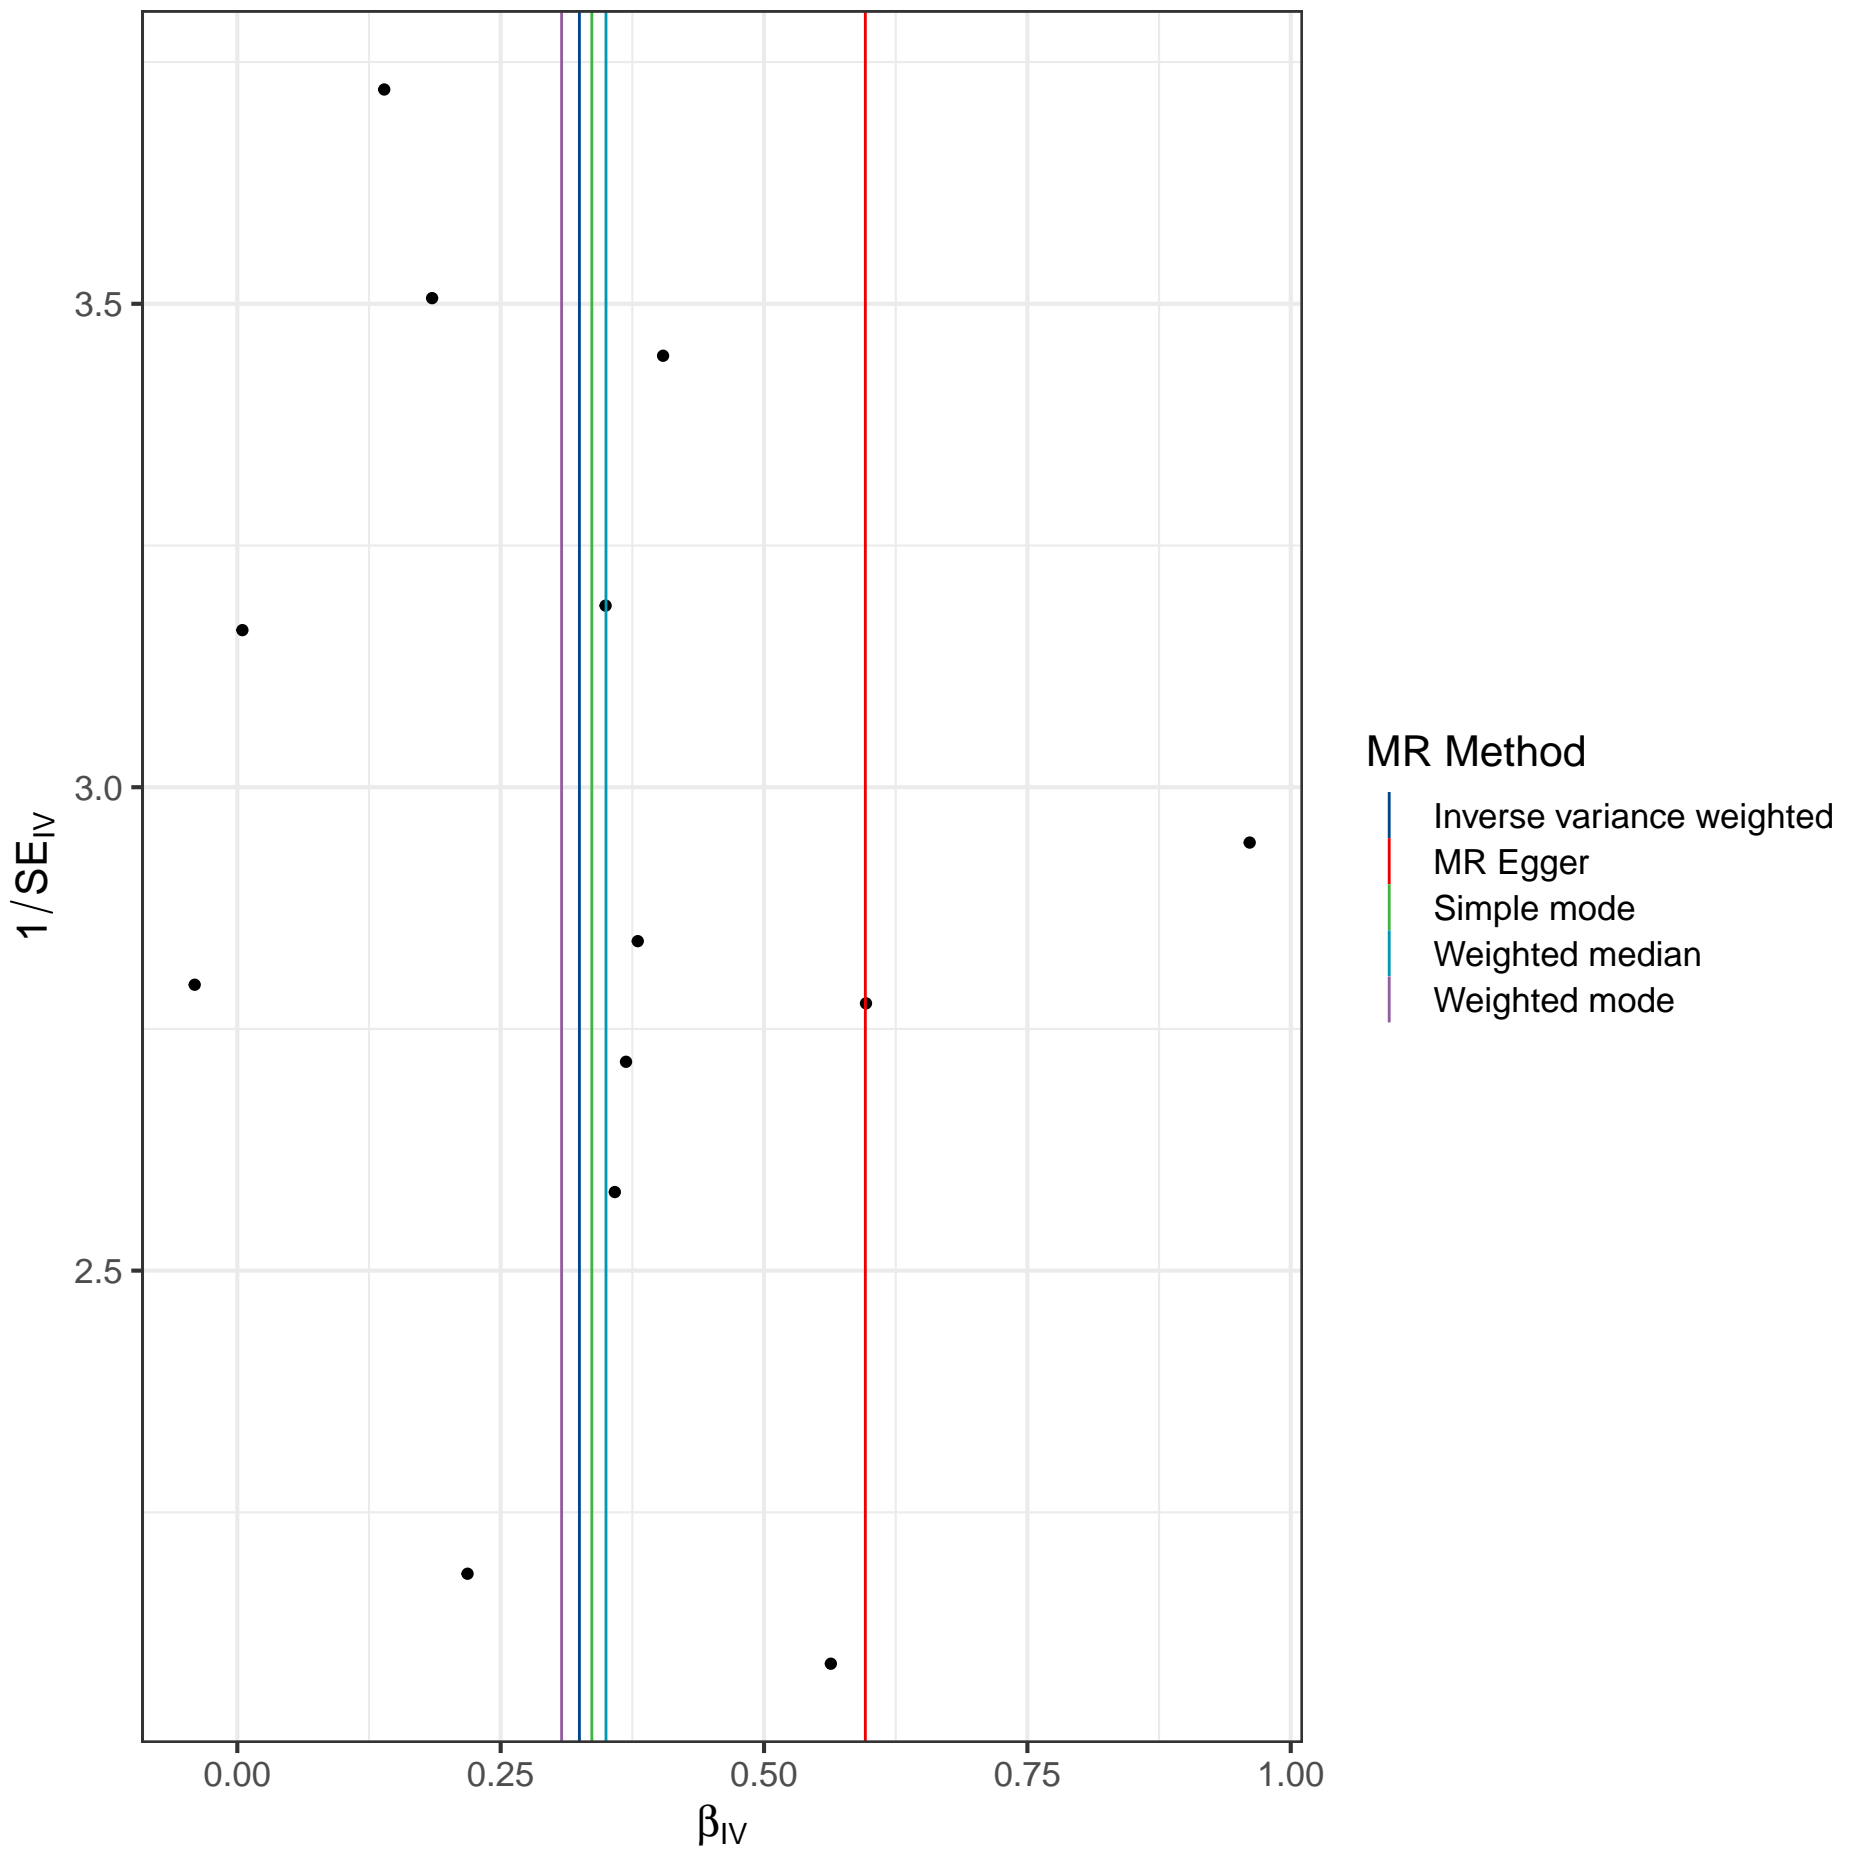

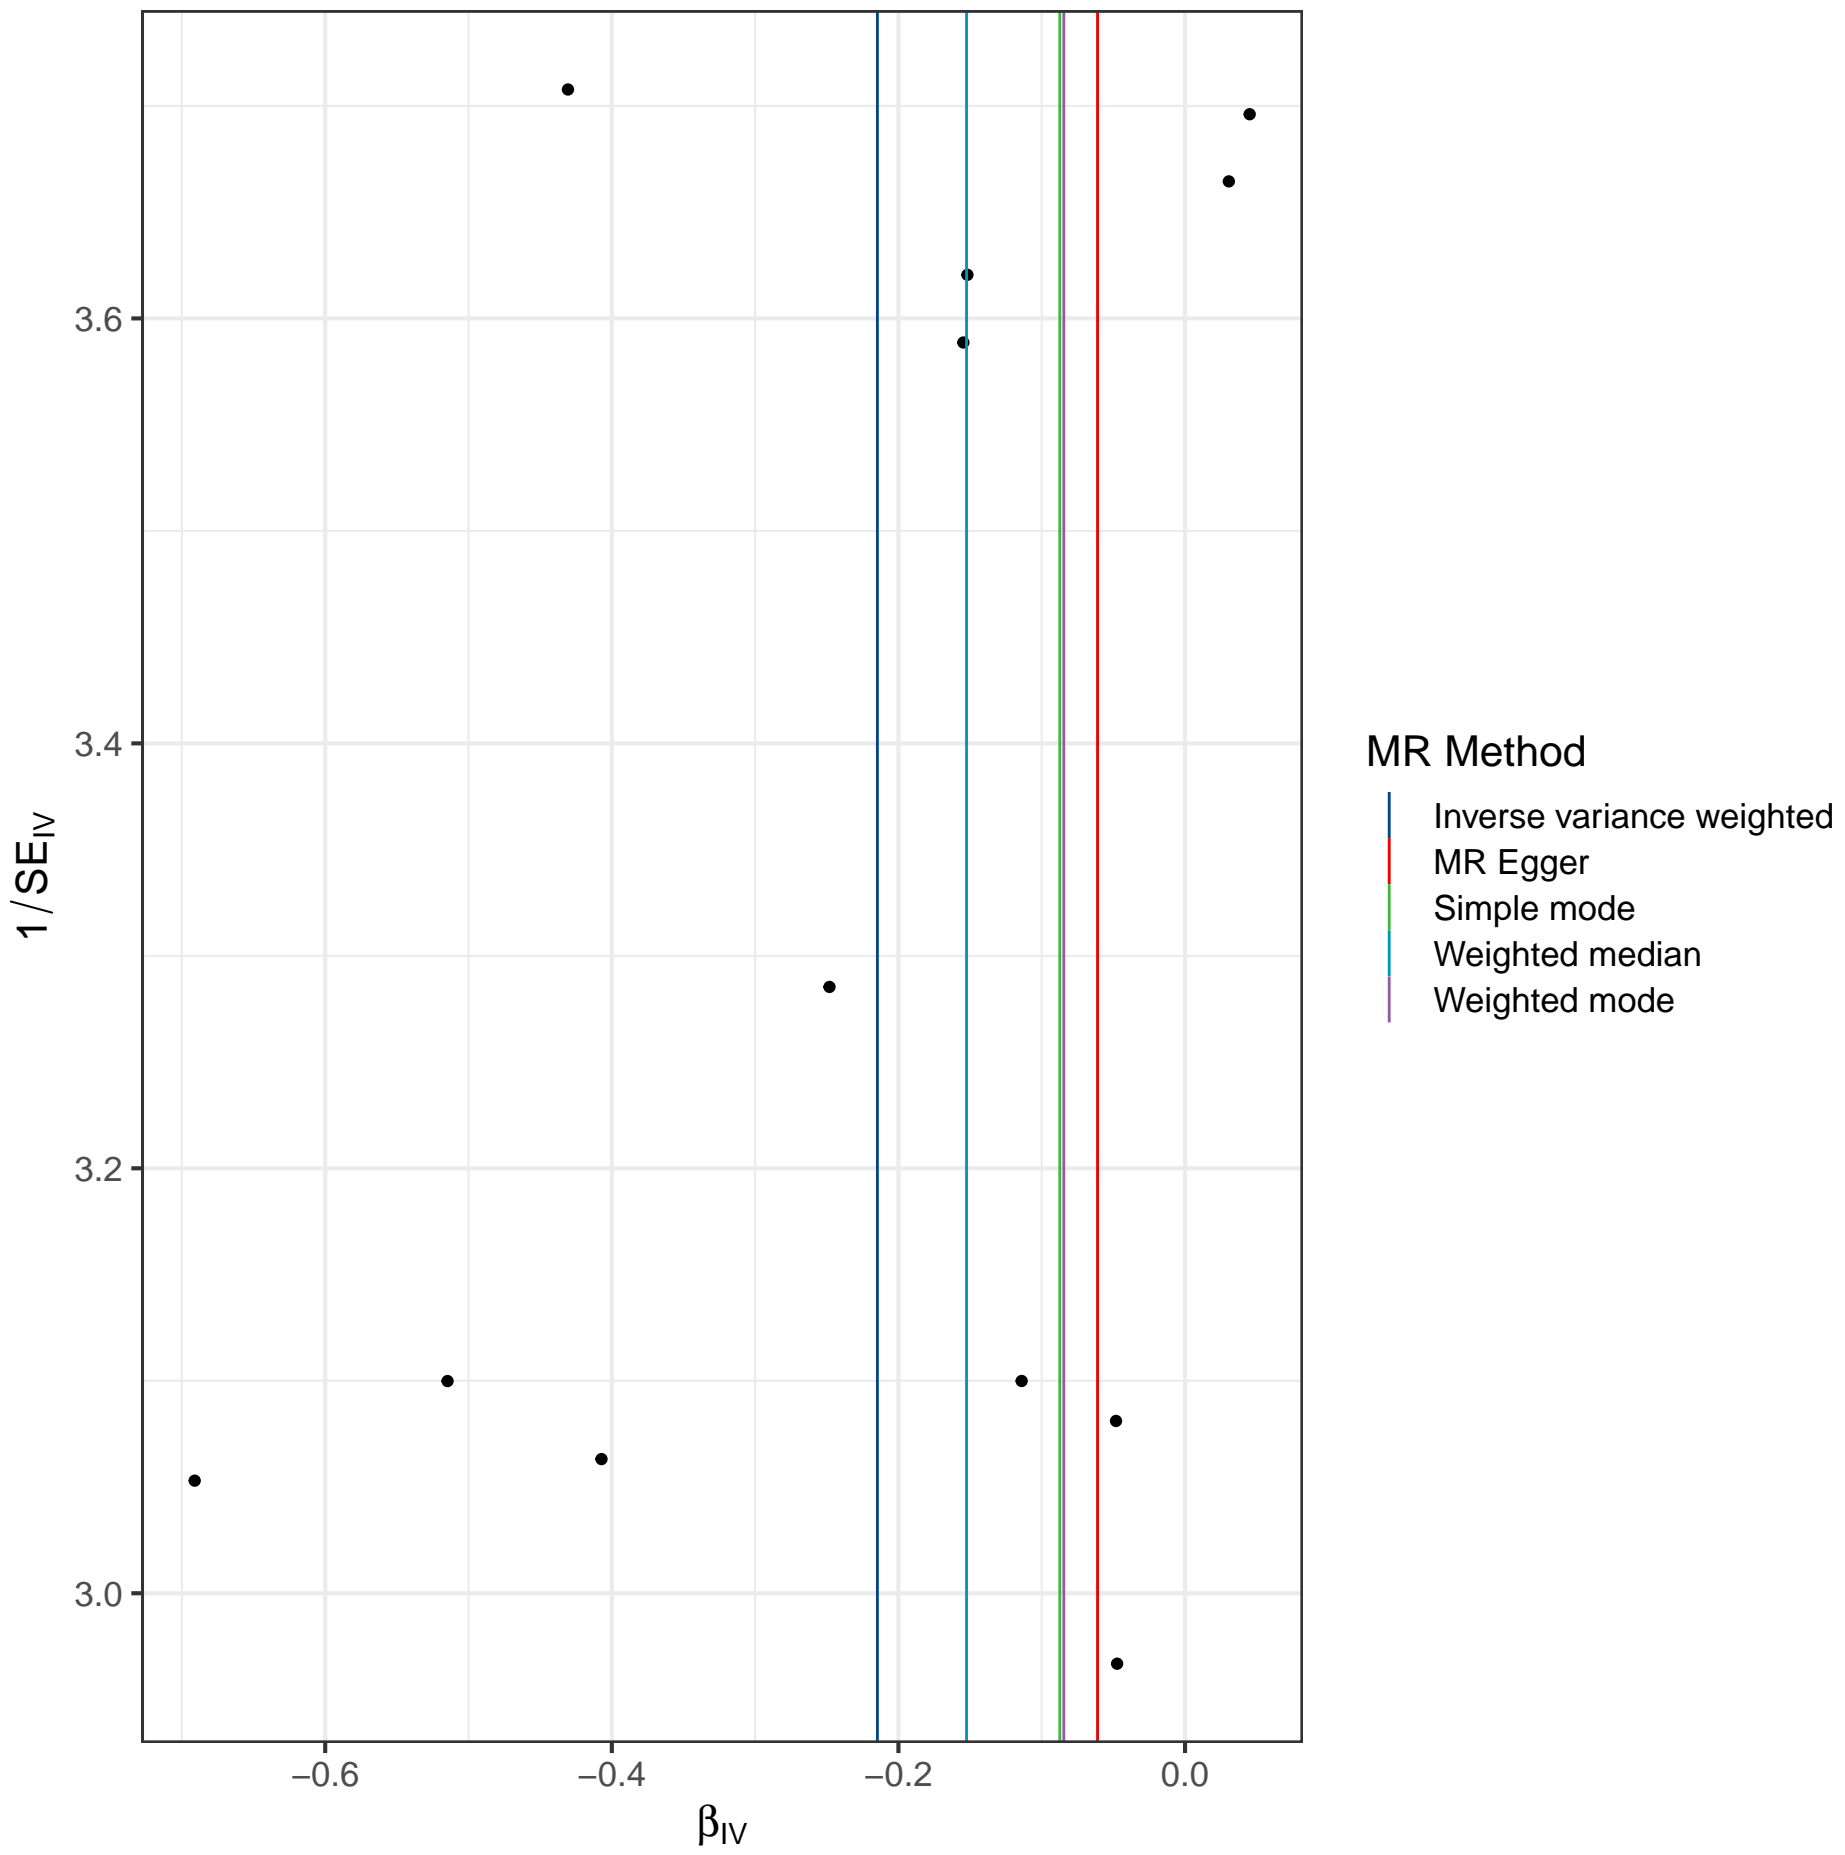

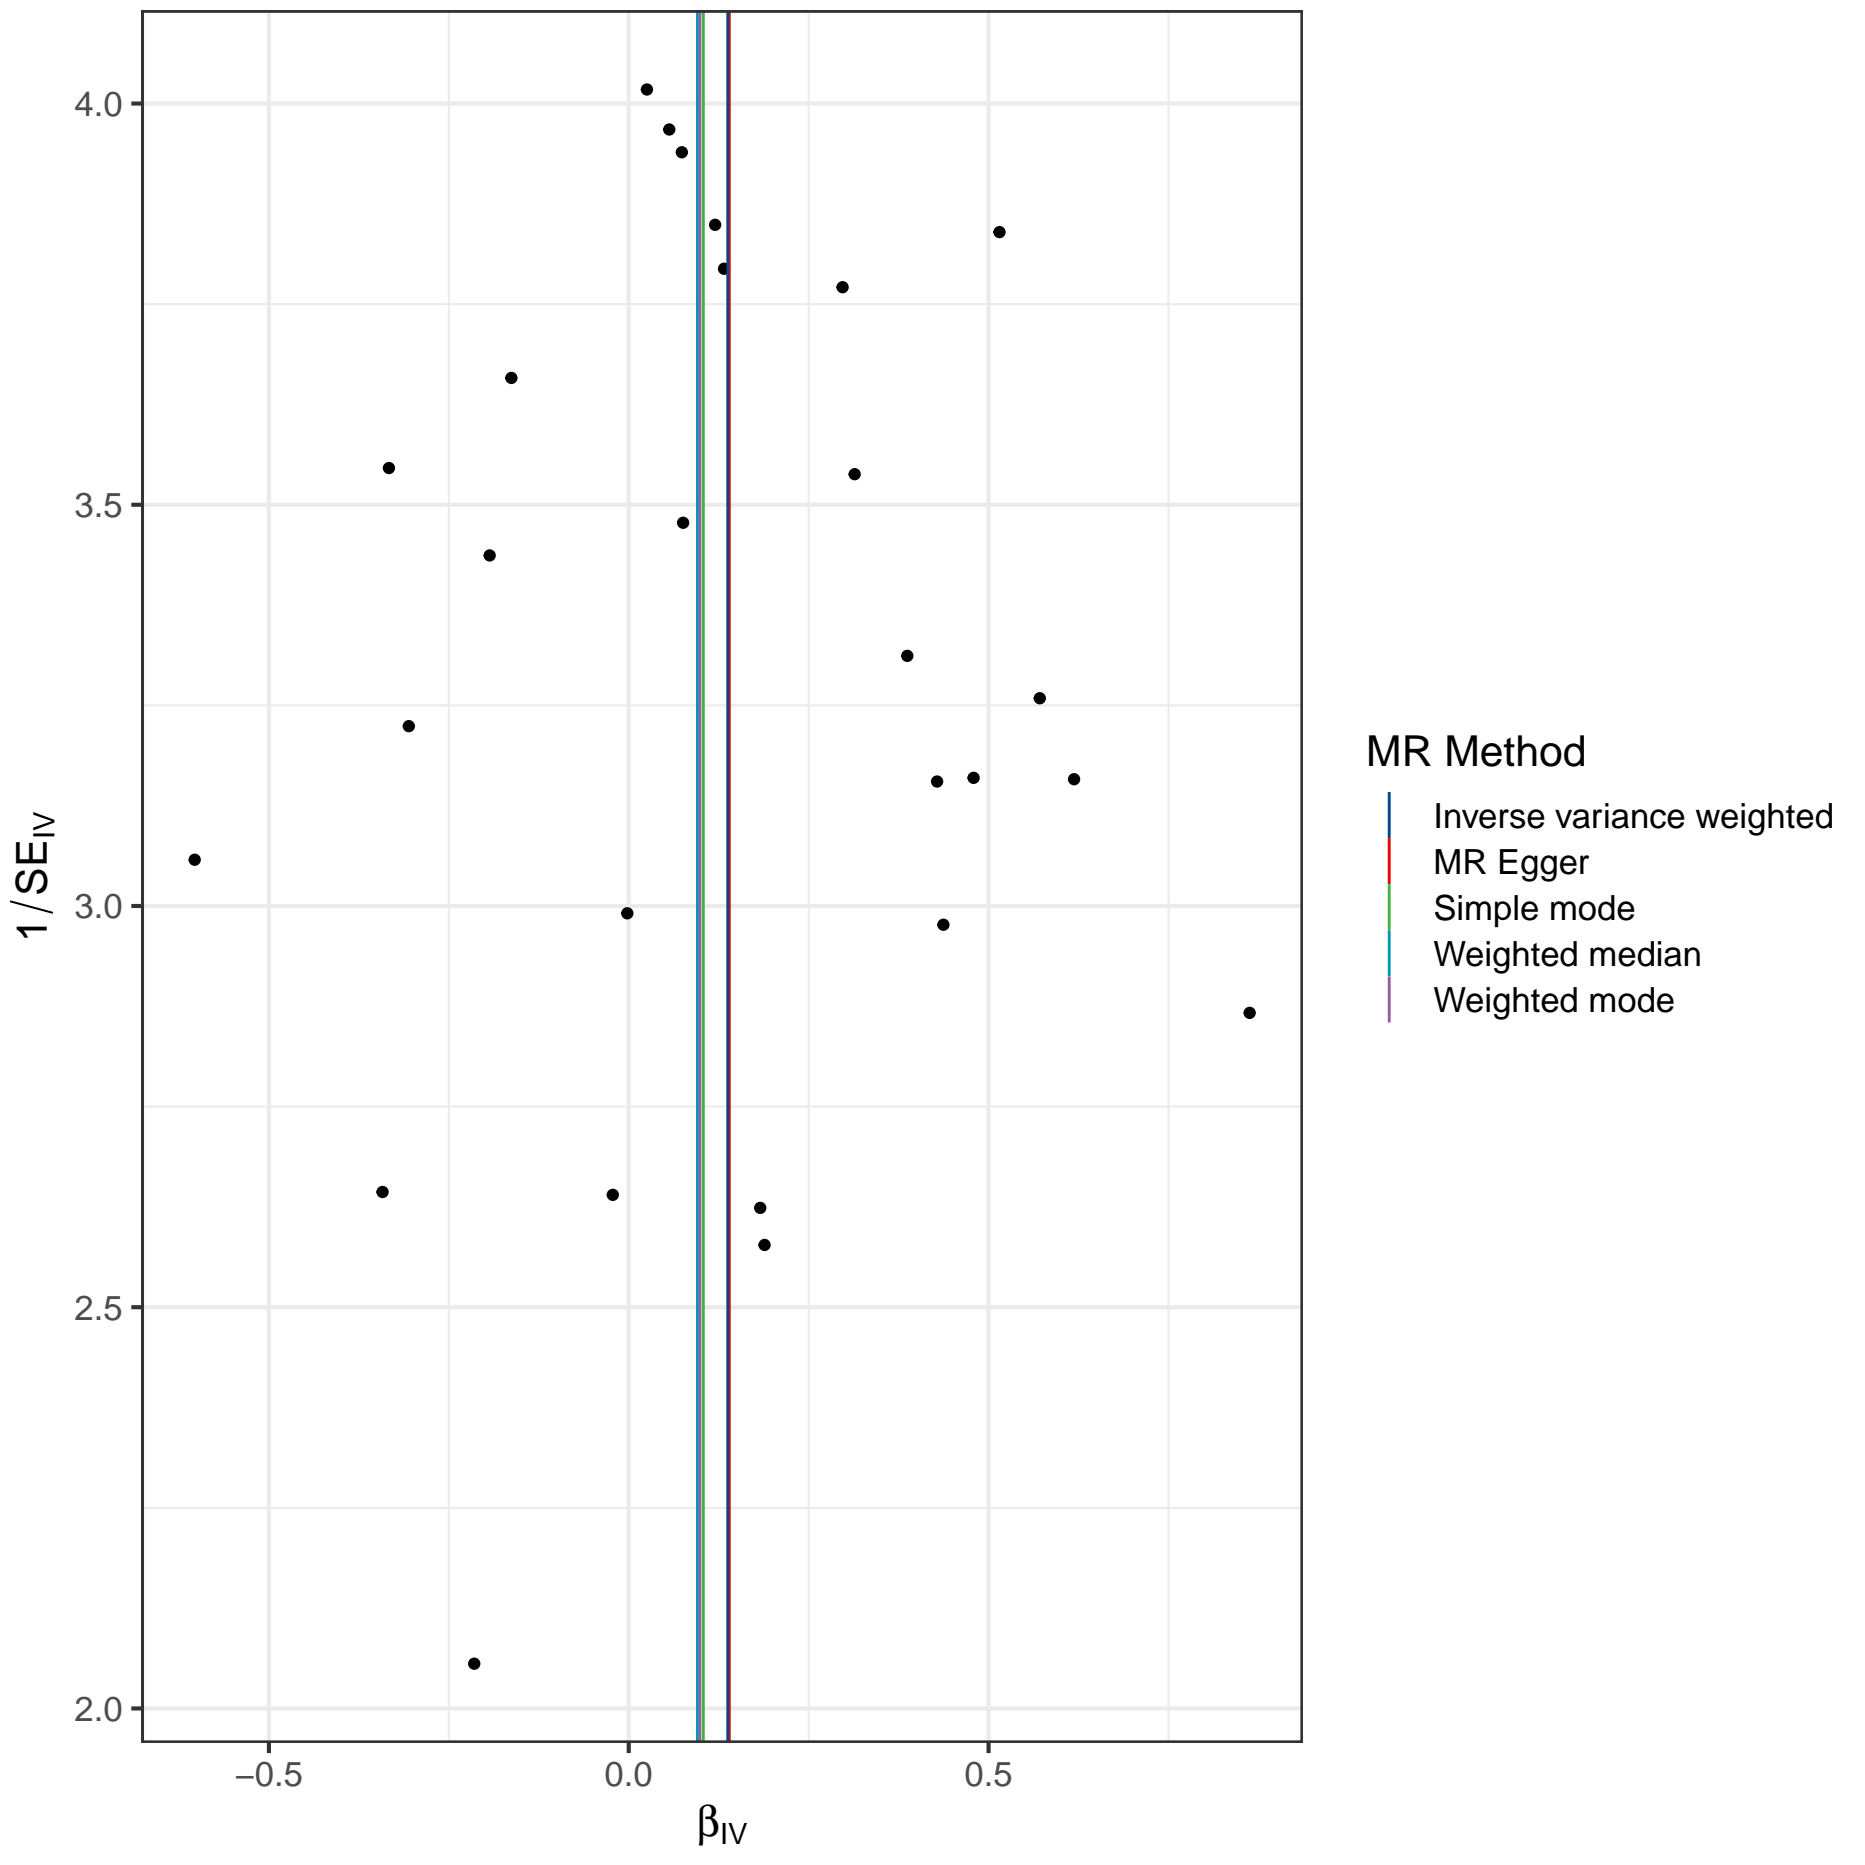

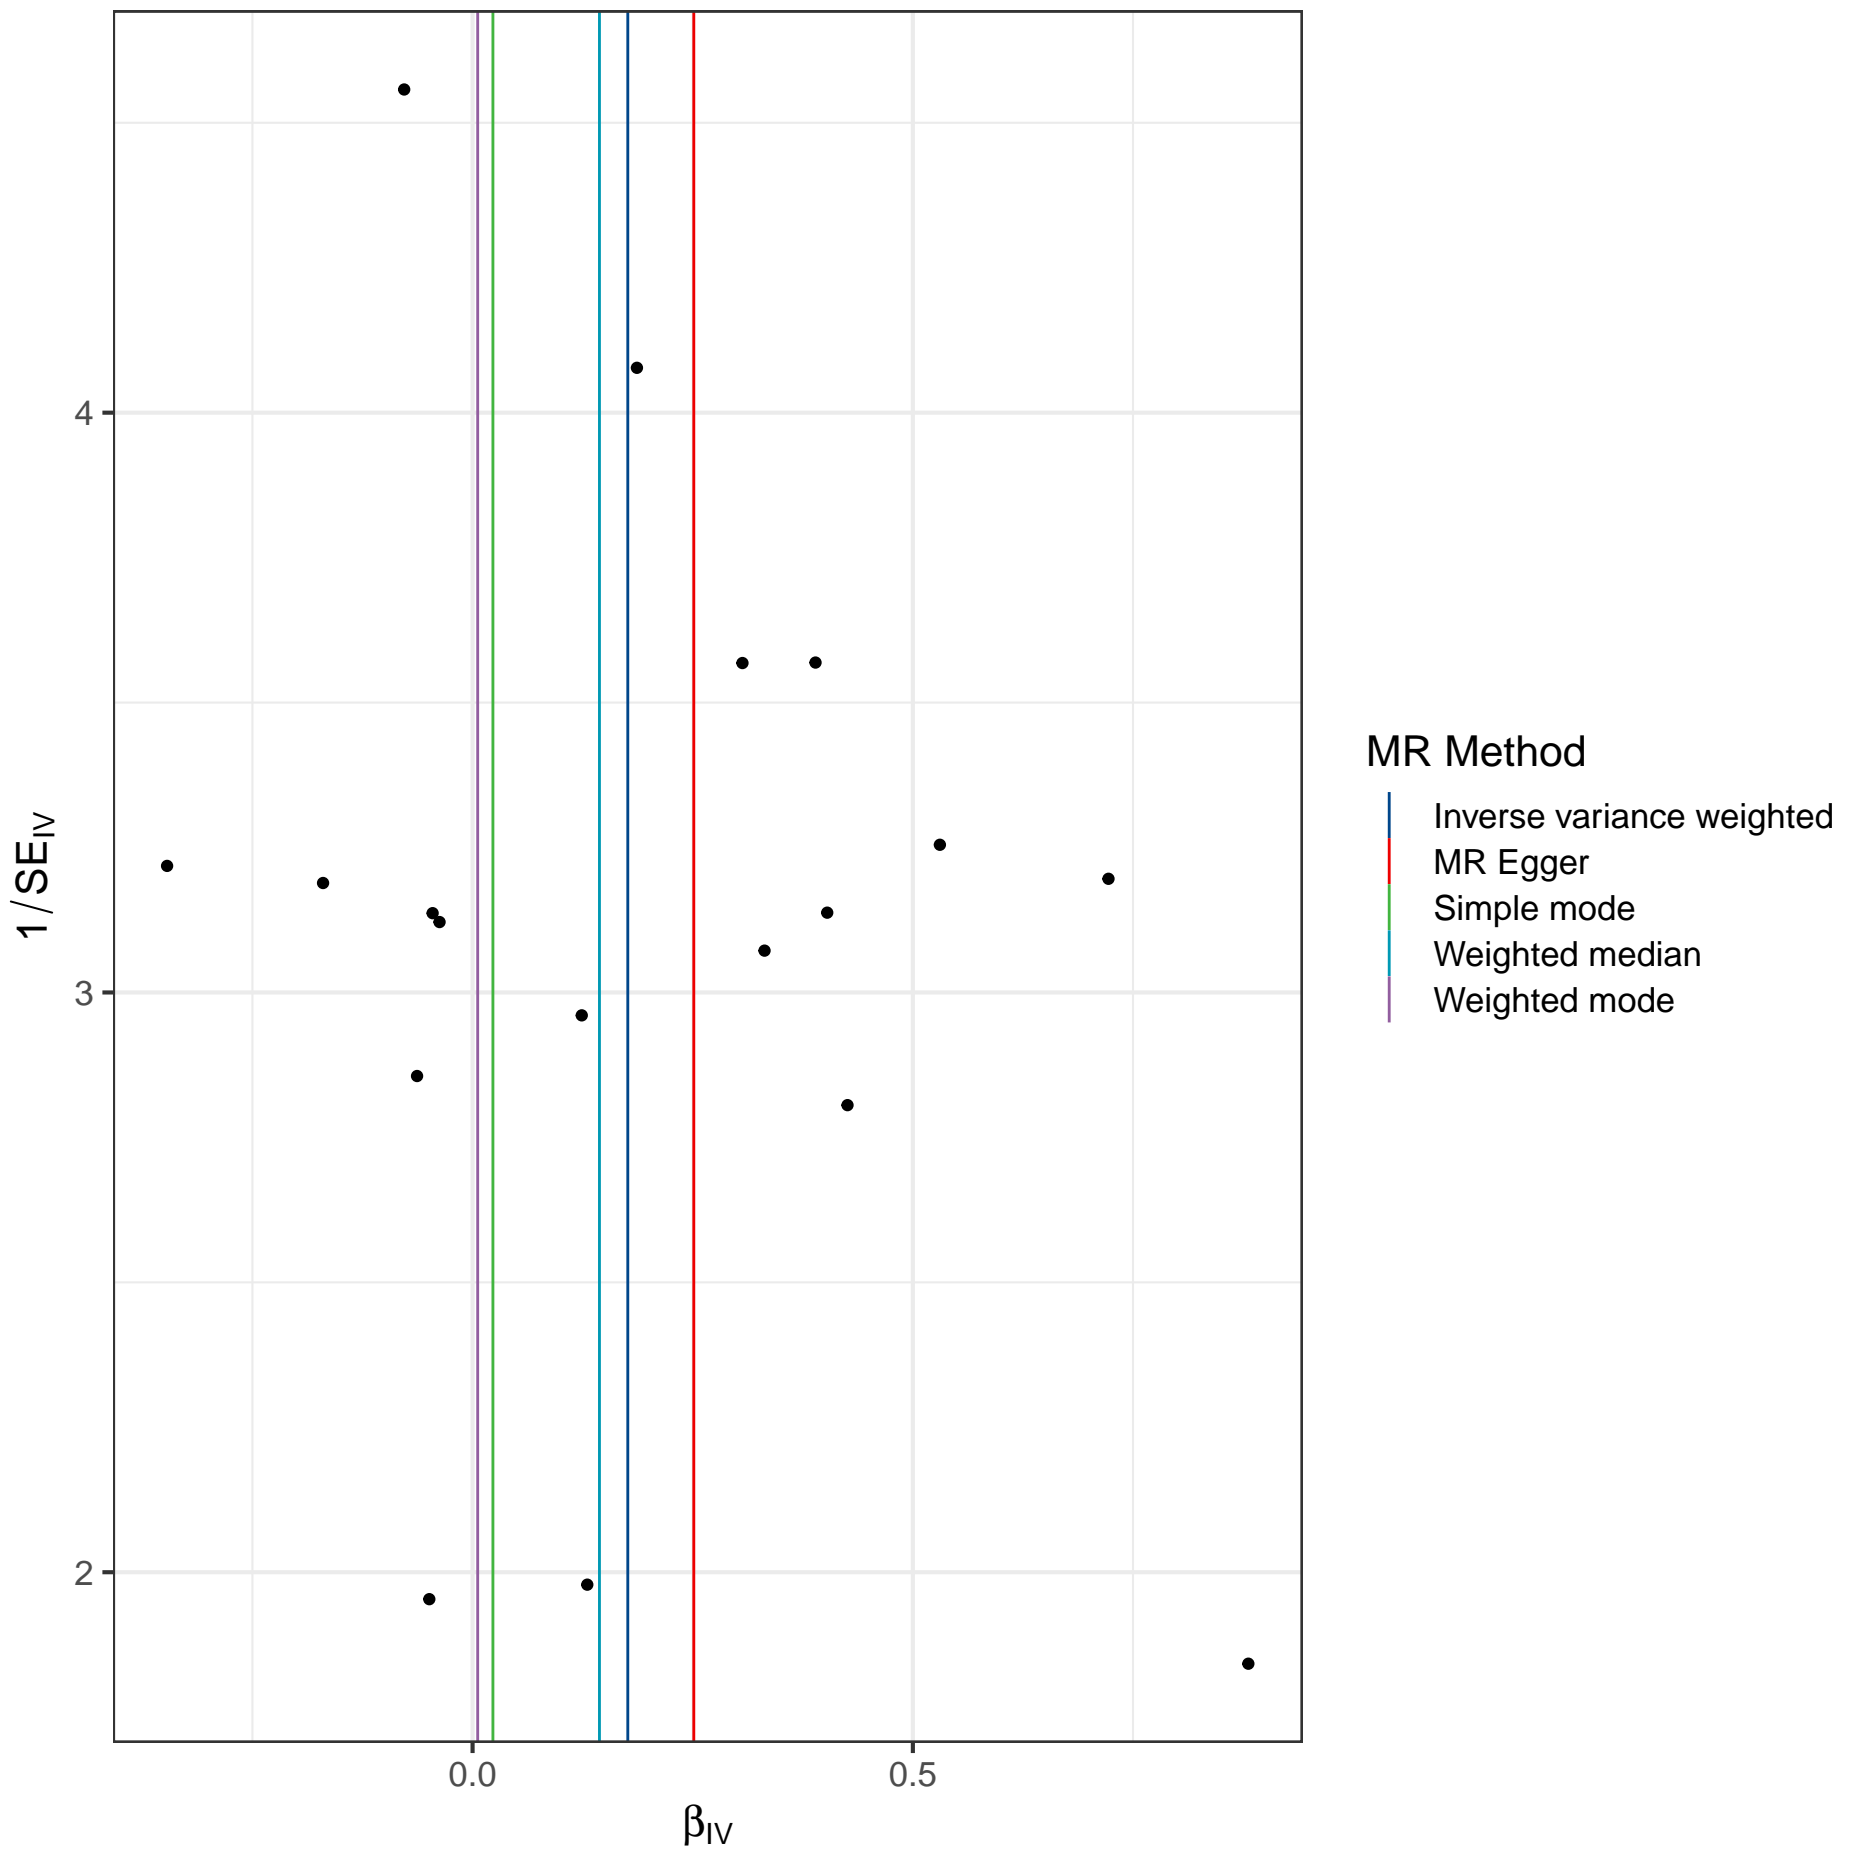



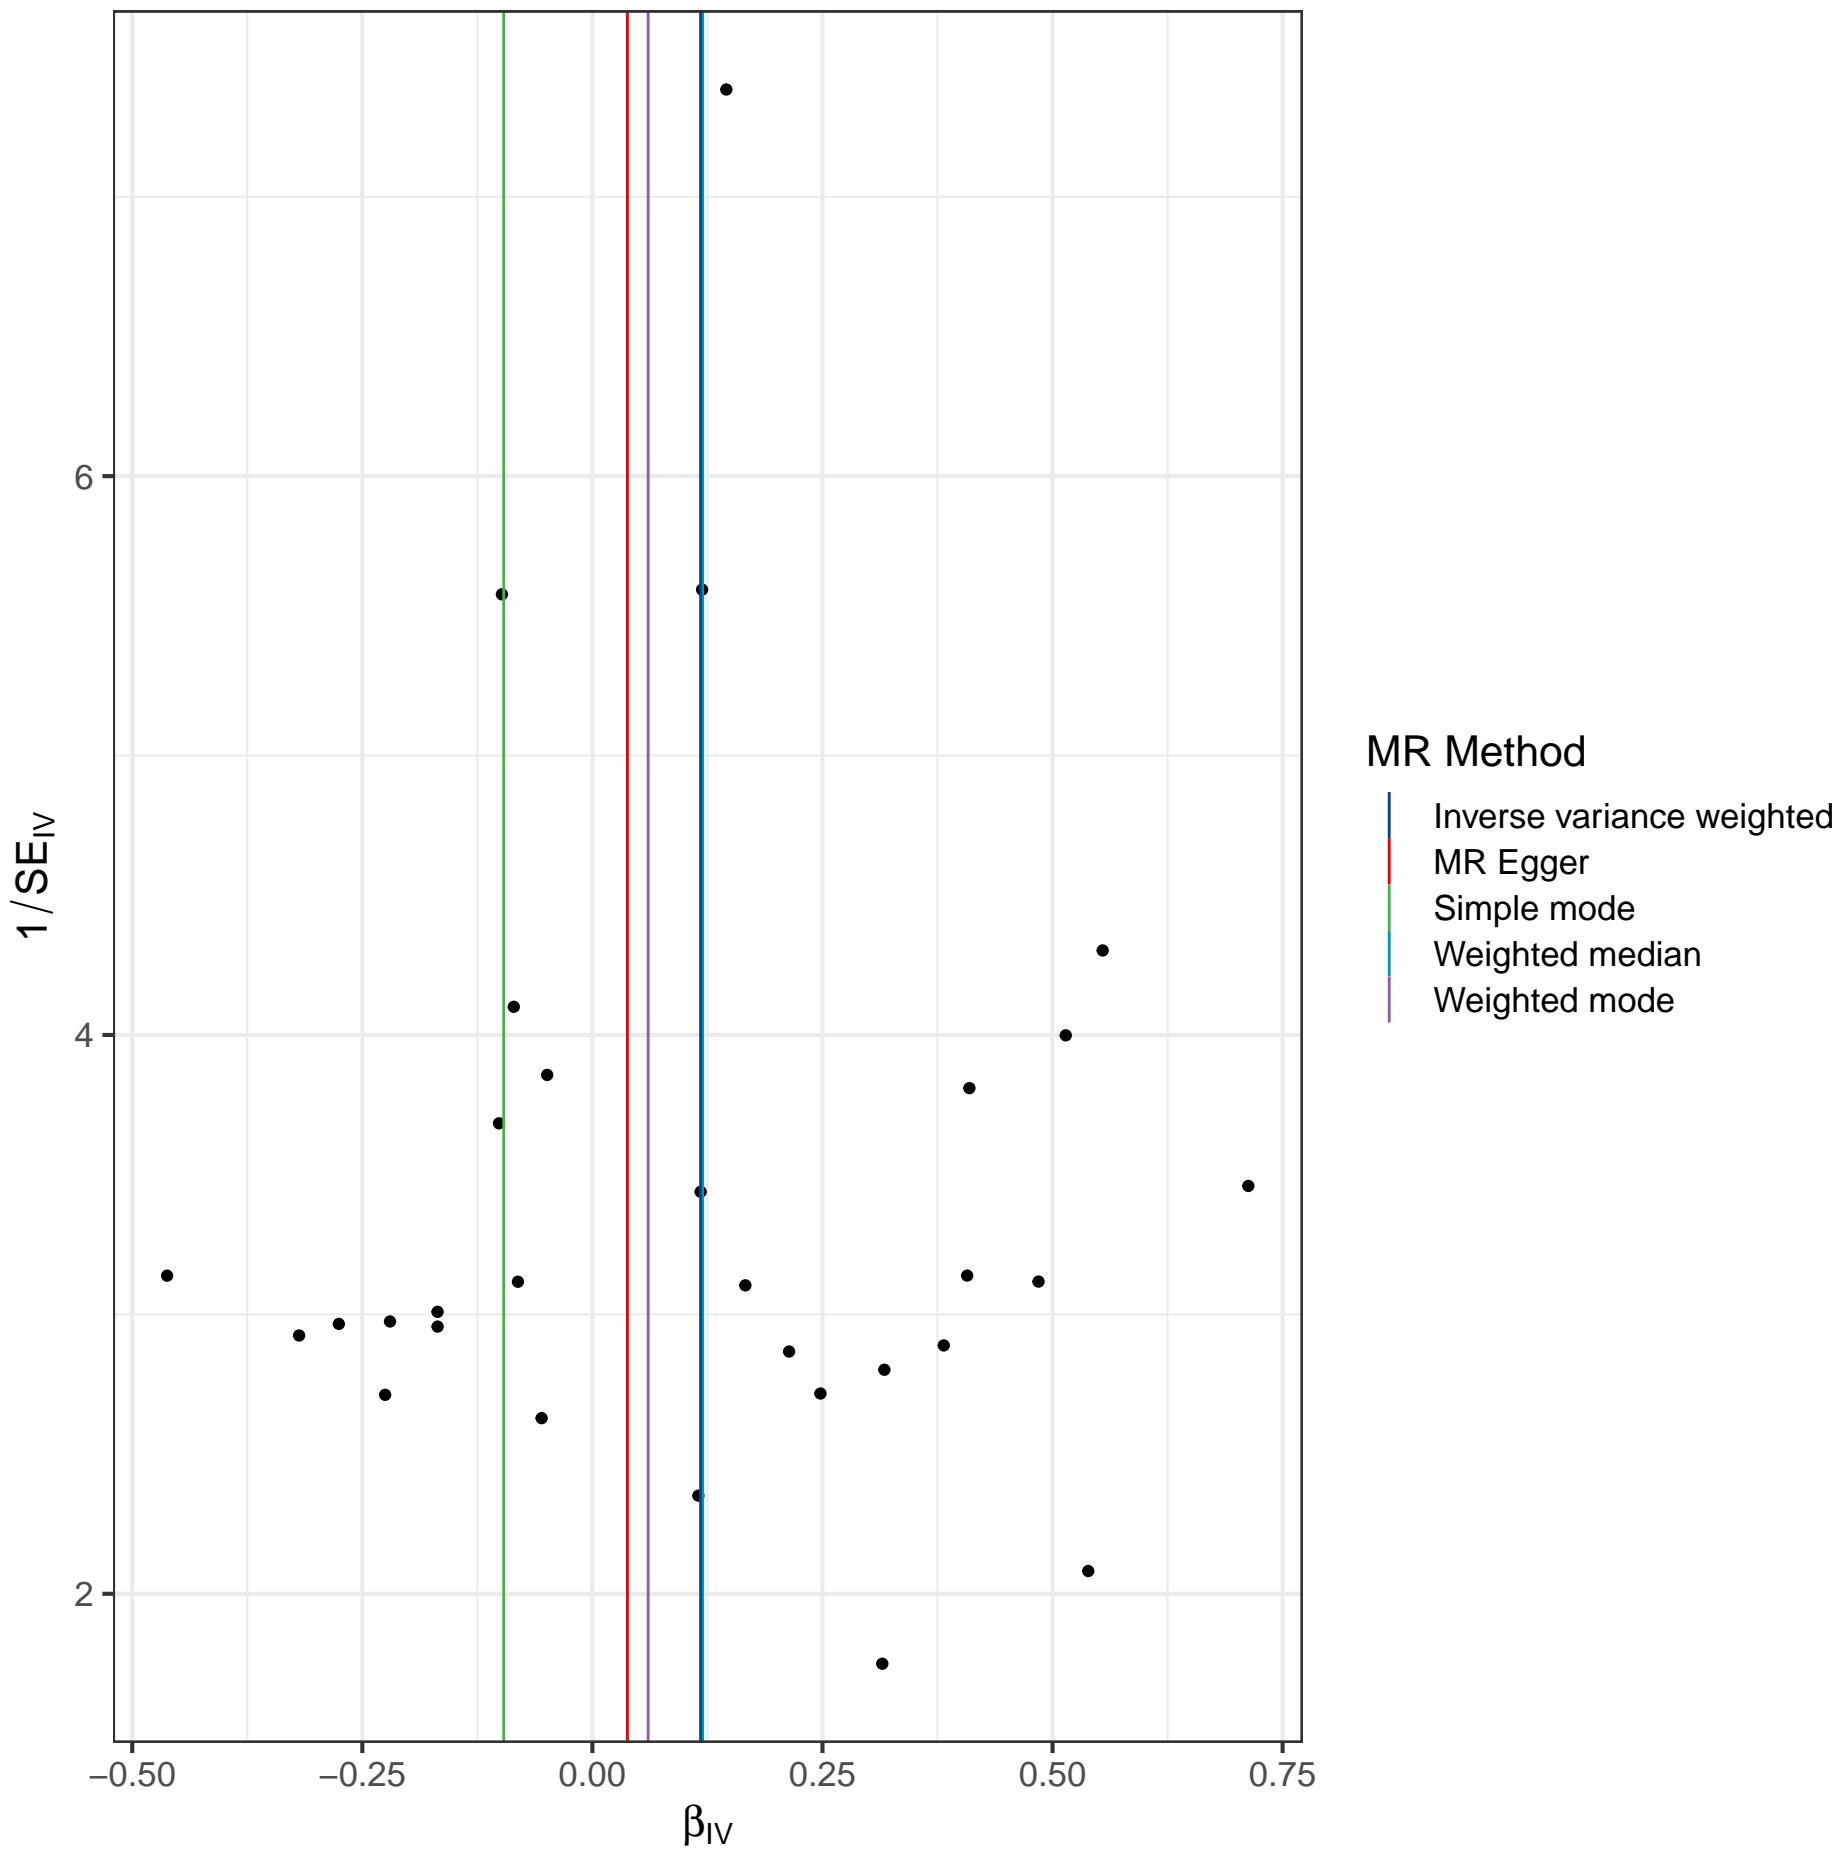

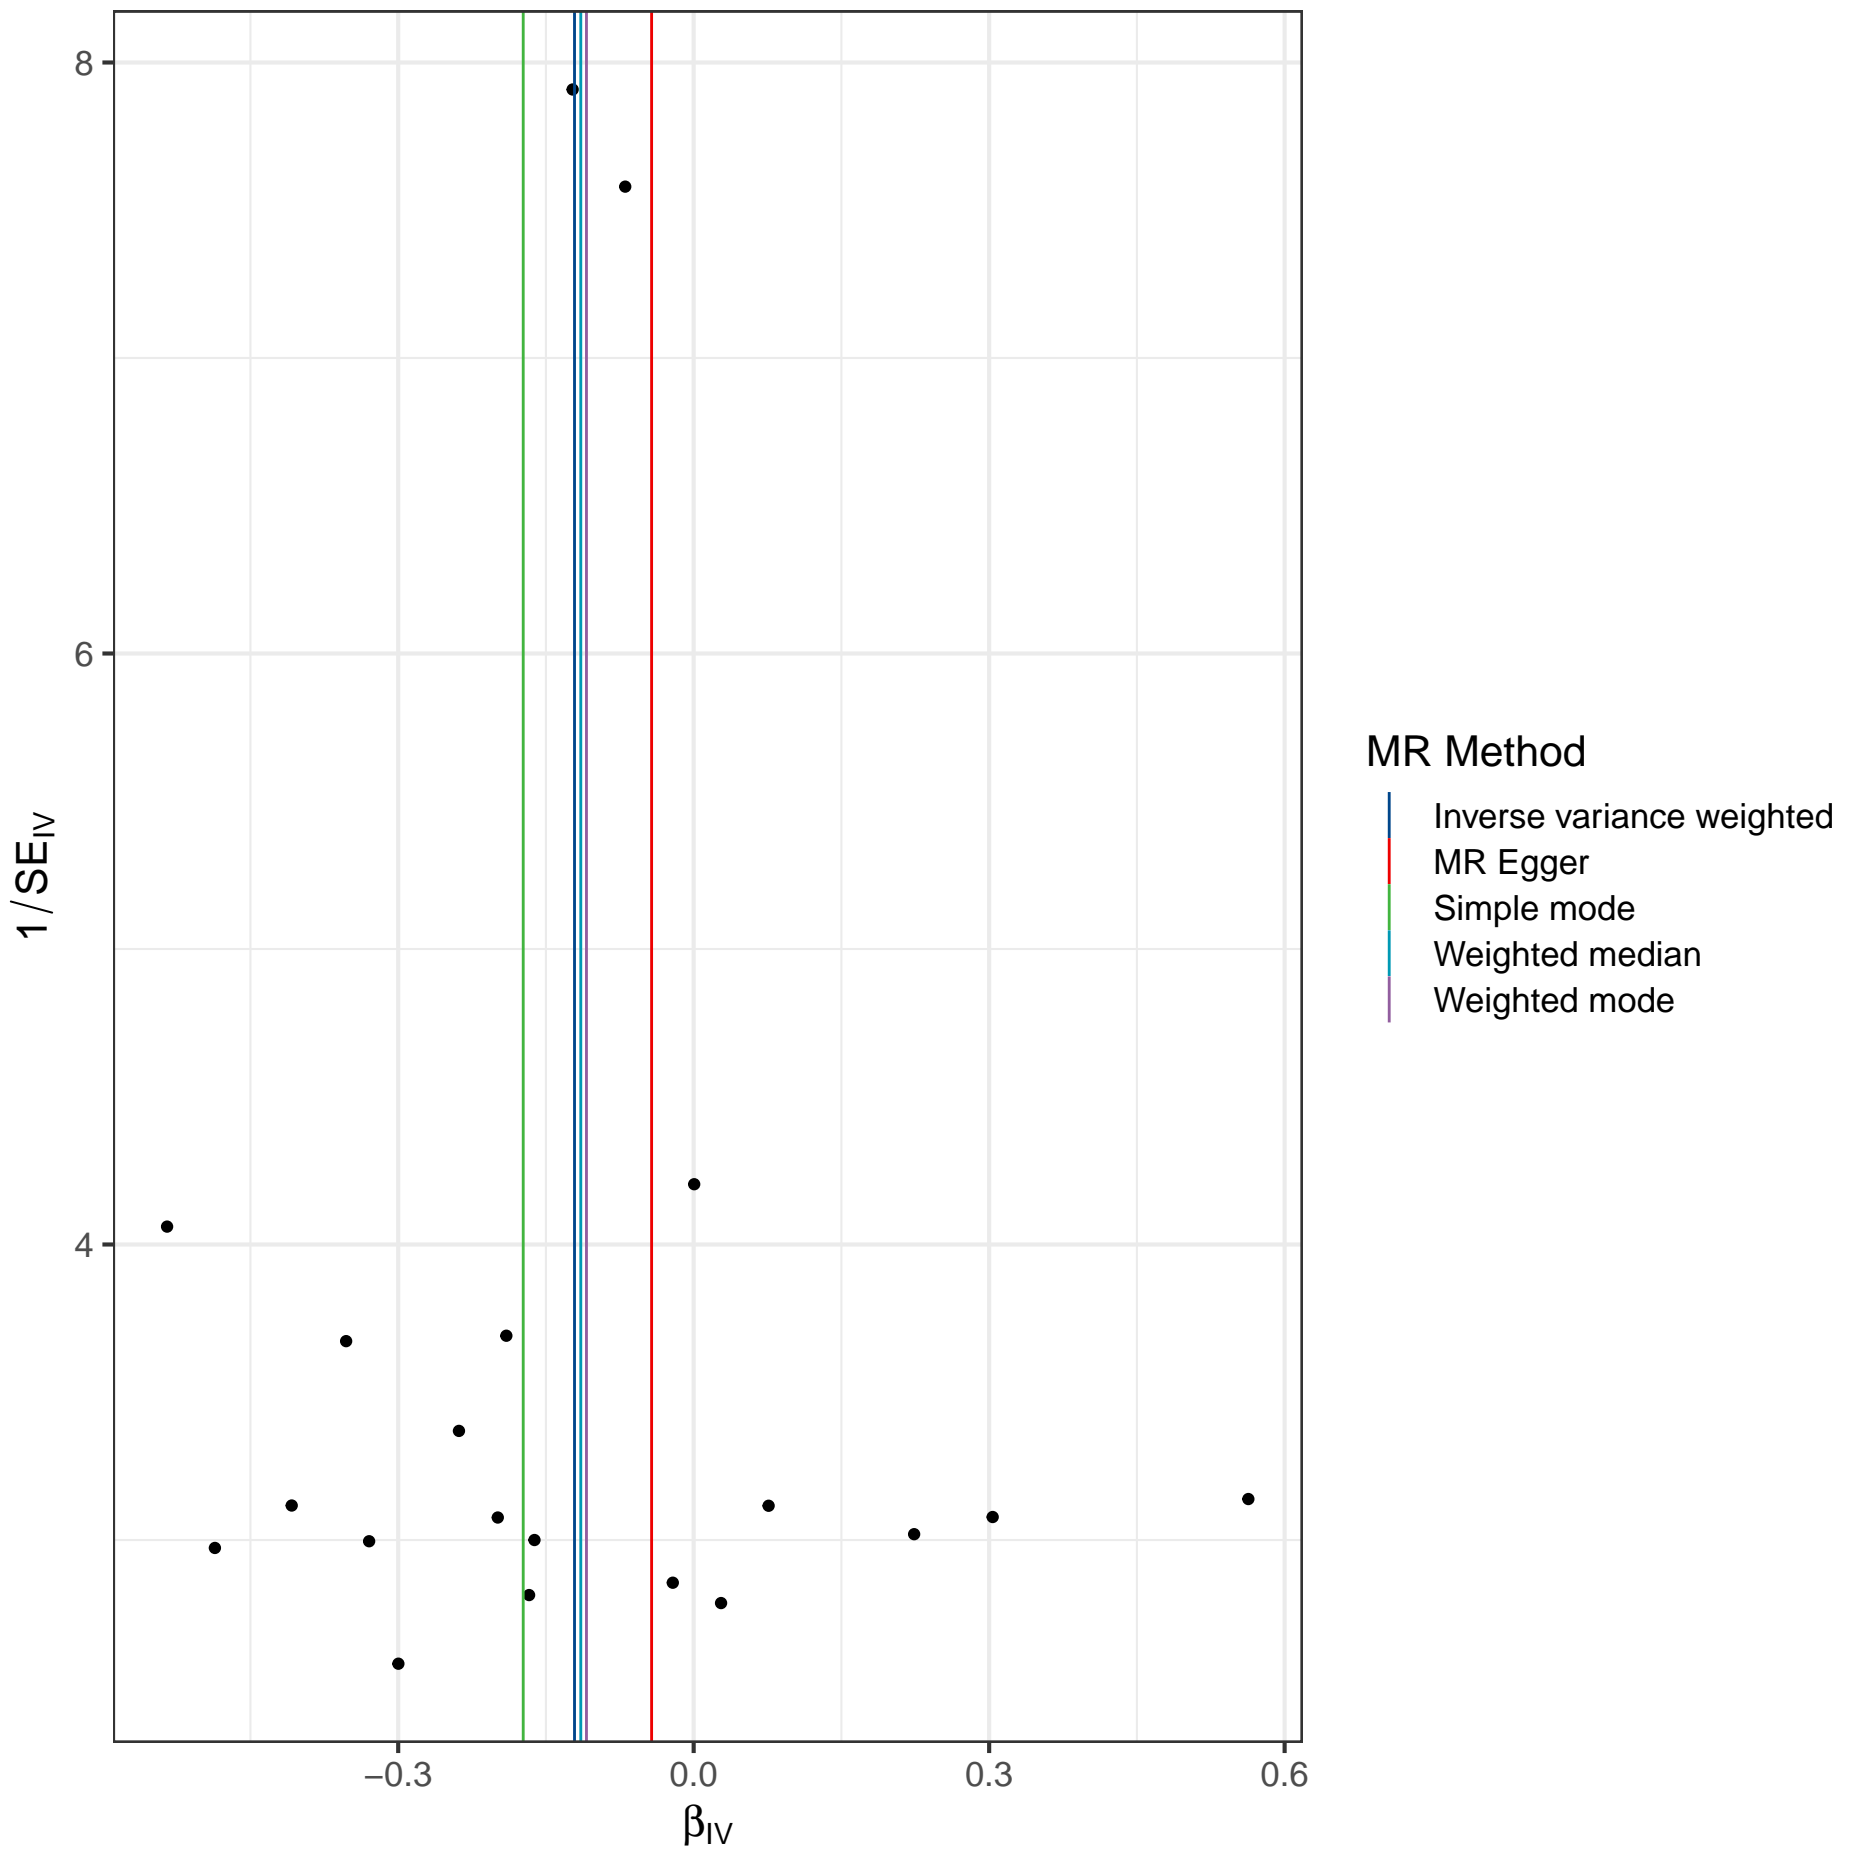

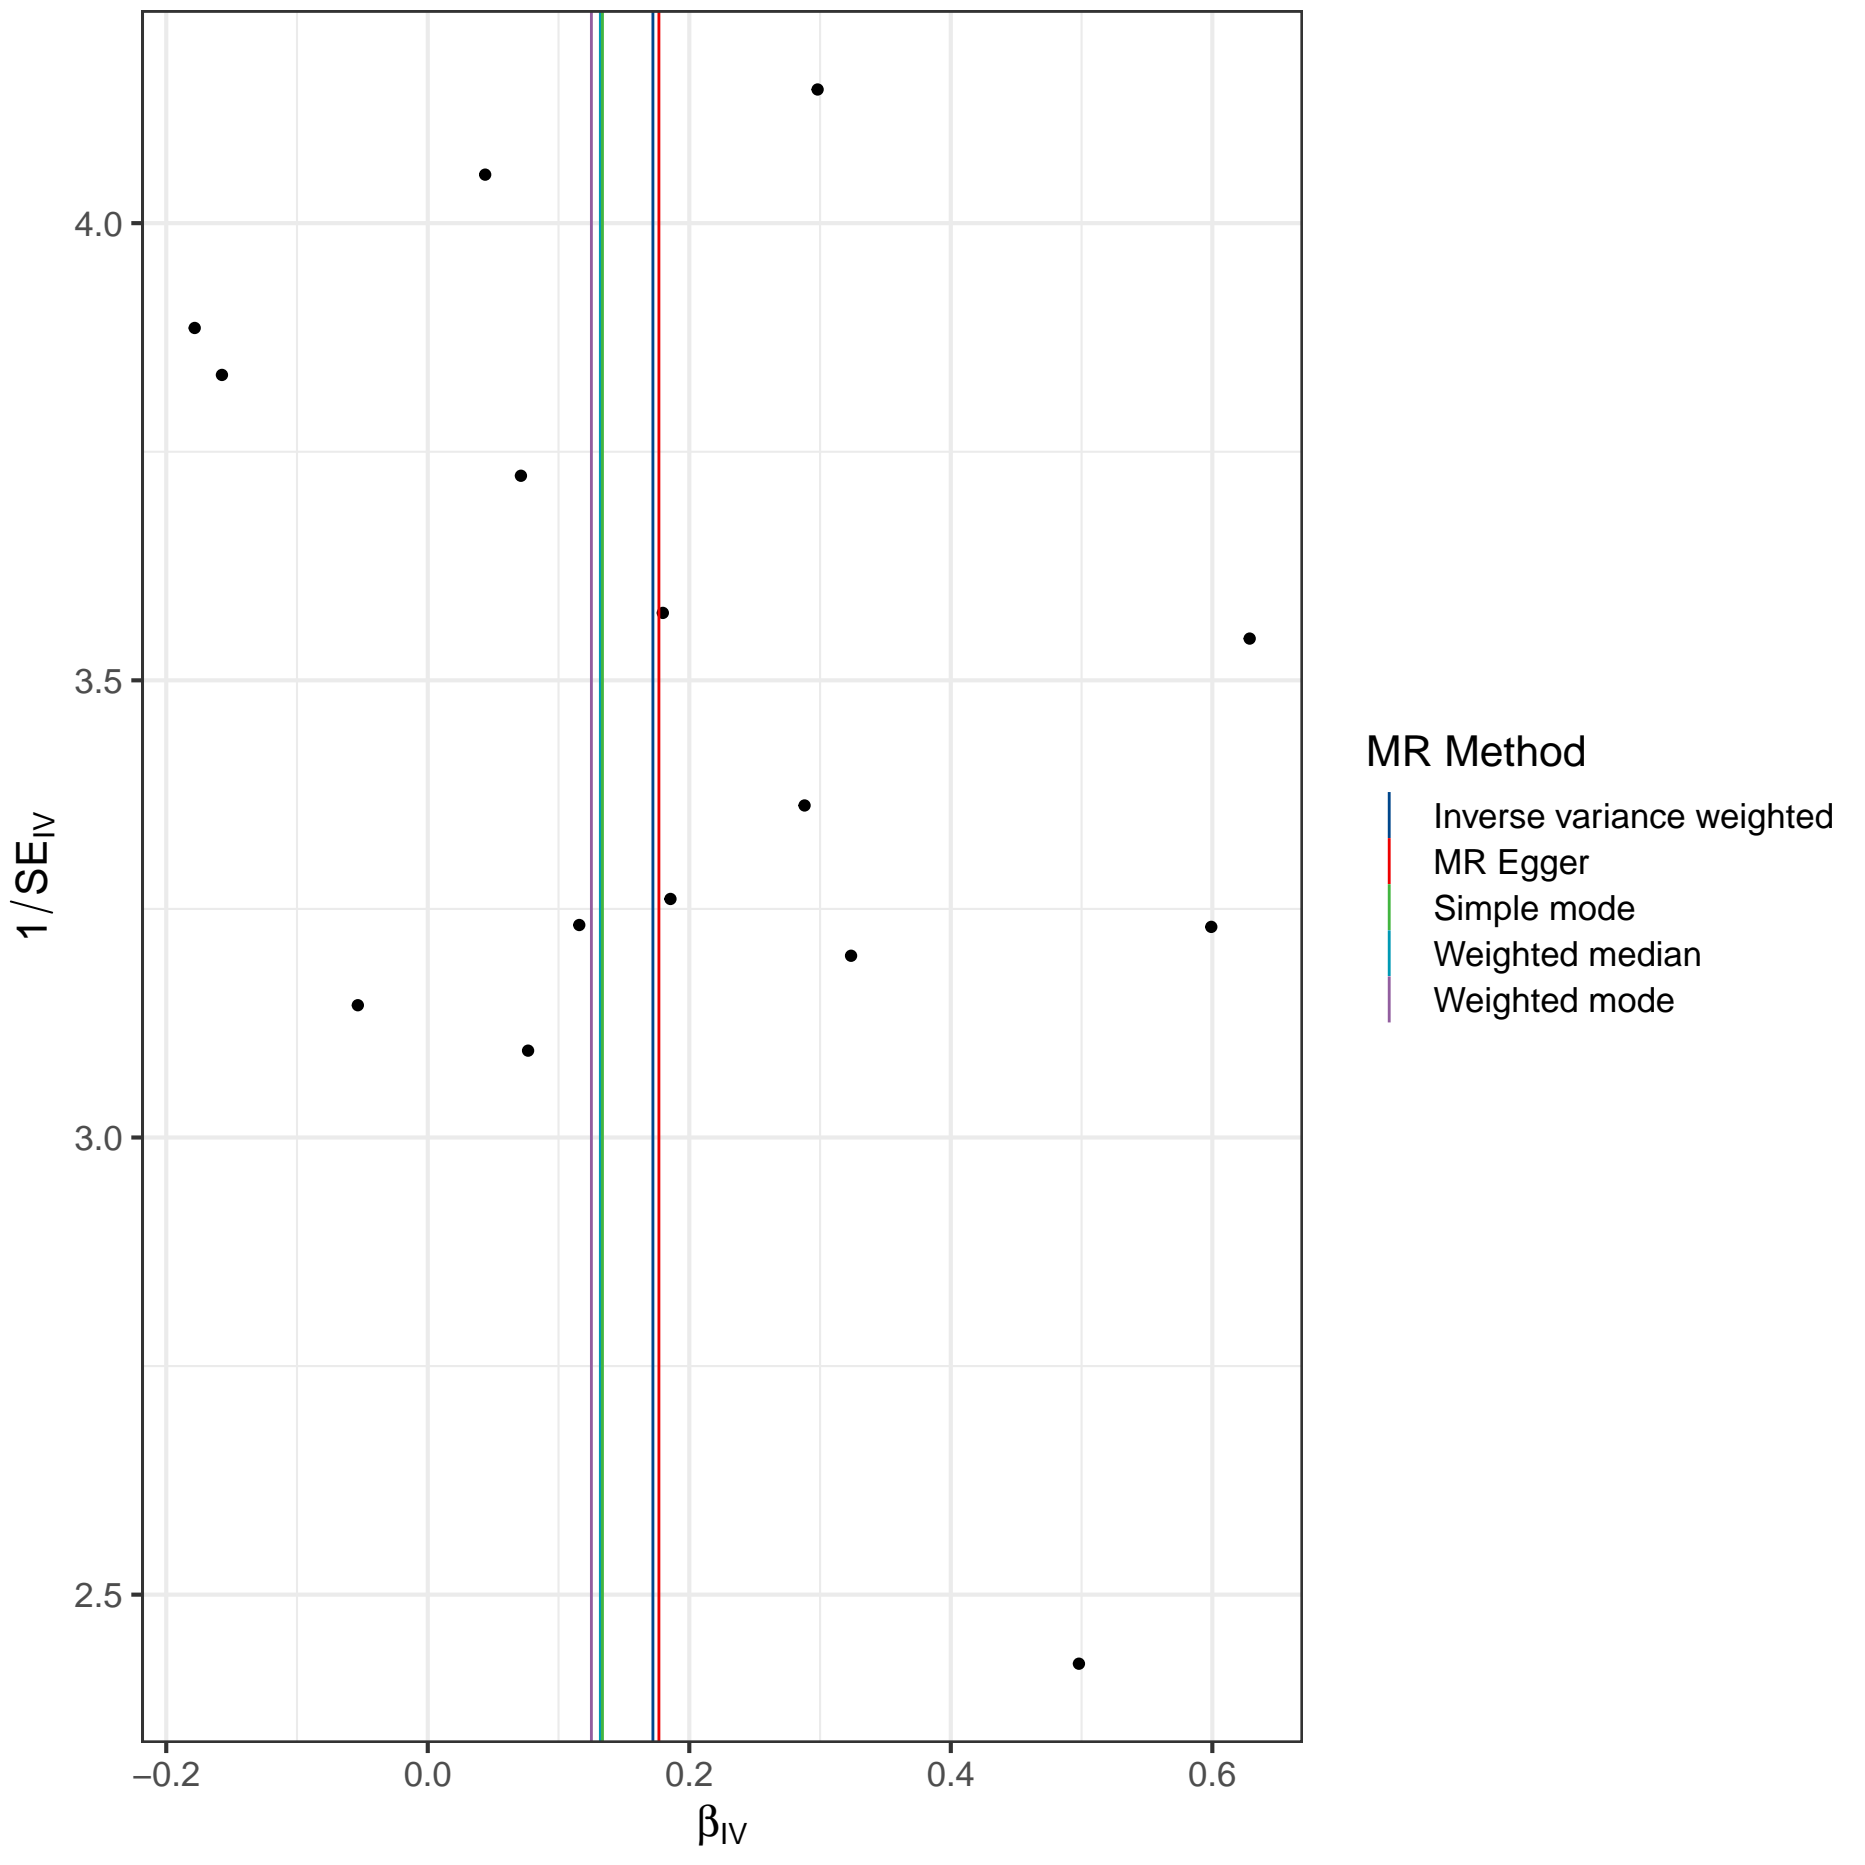

- MR Method
- Inverse variance weighted
  - MR Egger
  - Simple mode
  - Weighted median
  - Weighted mode

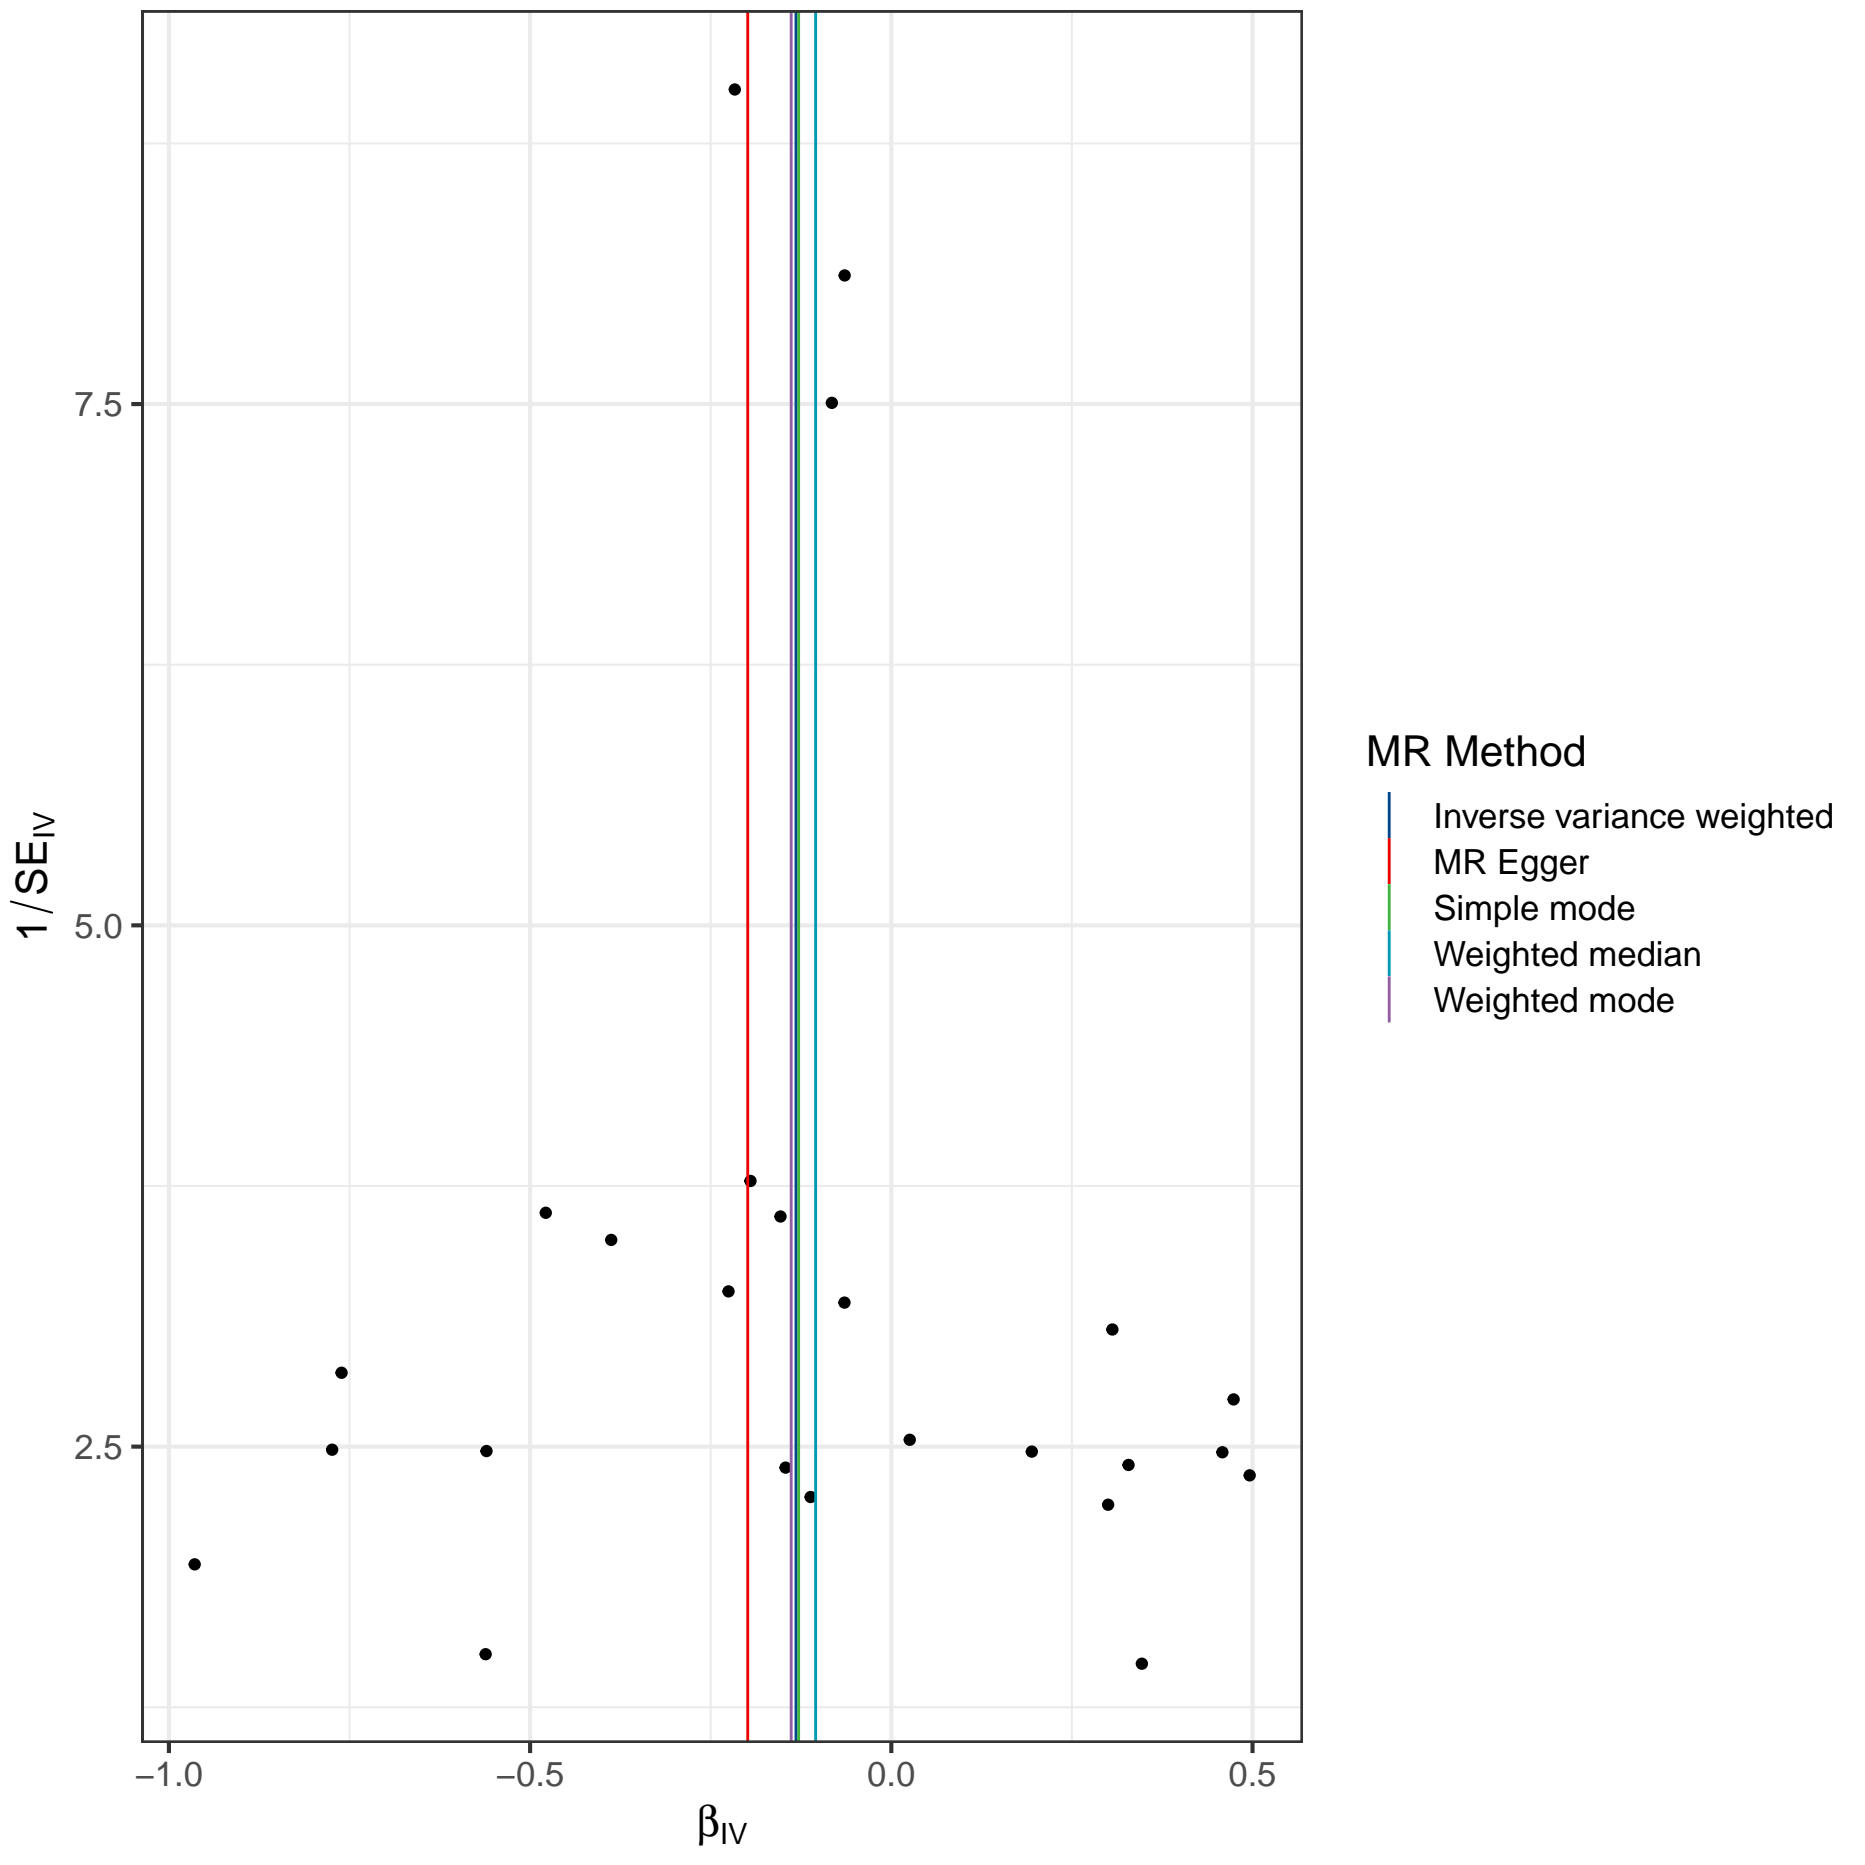

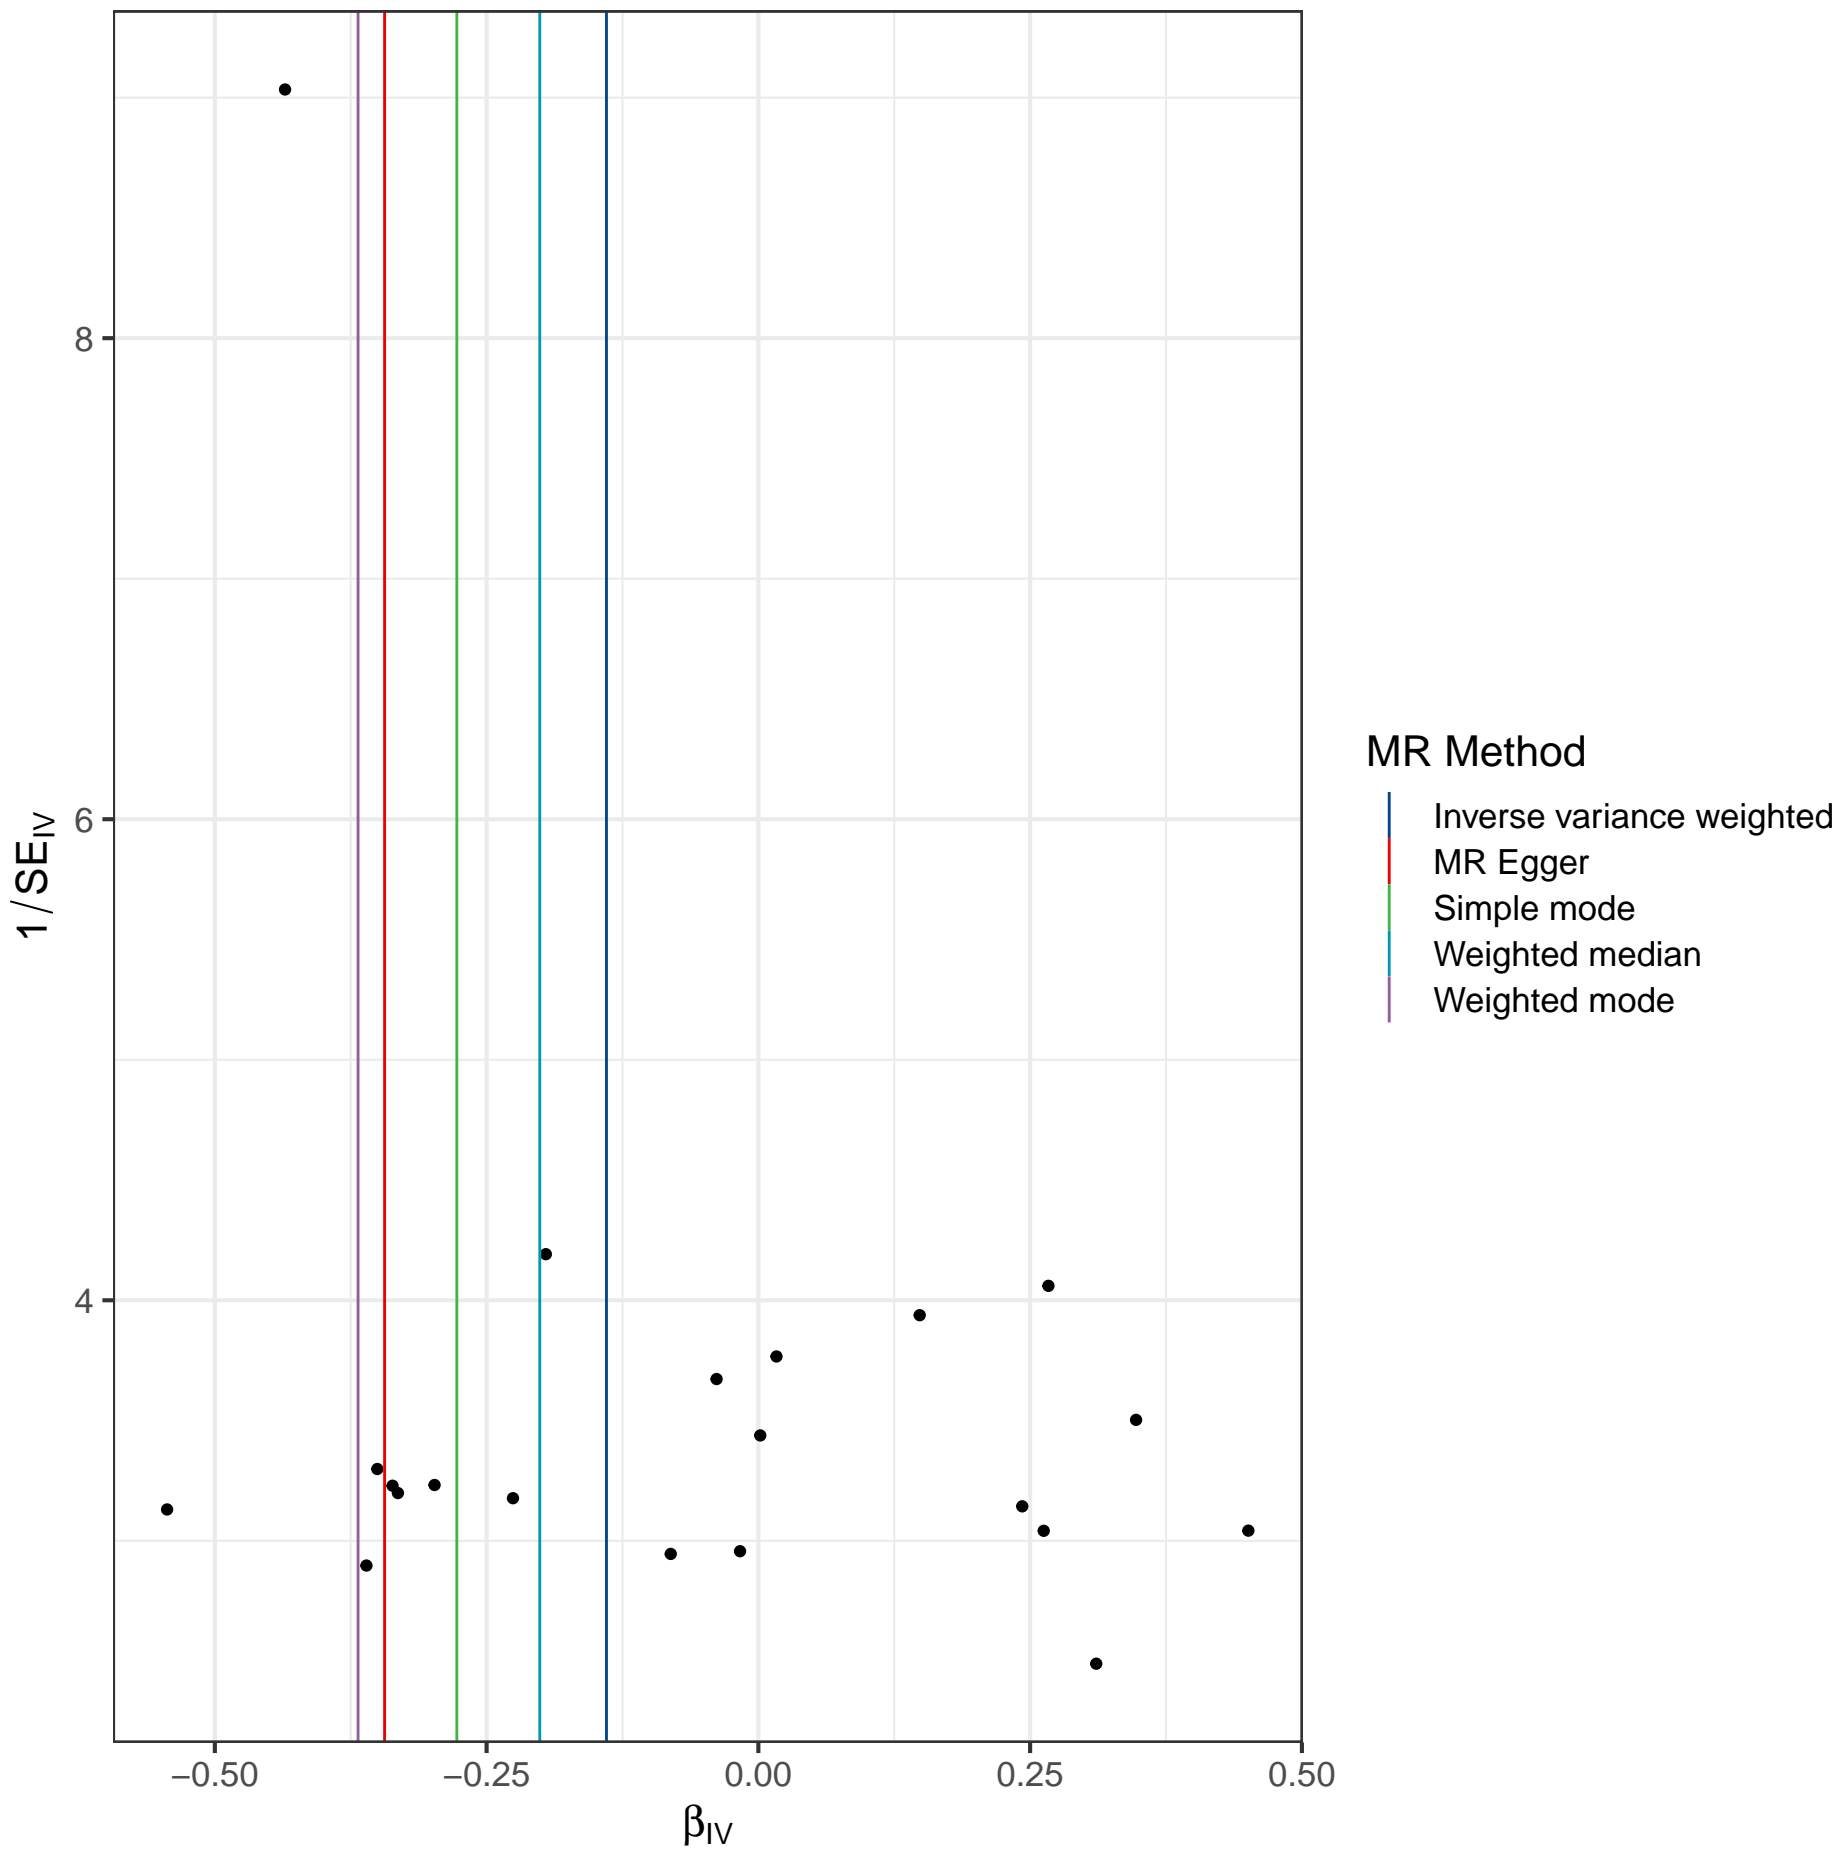

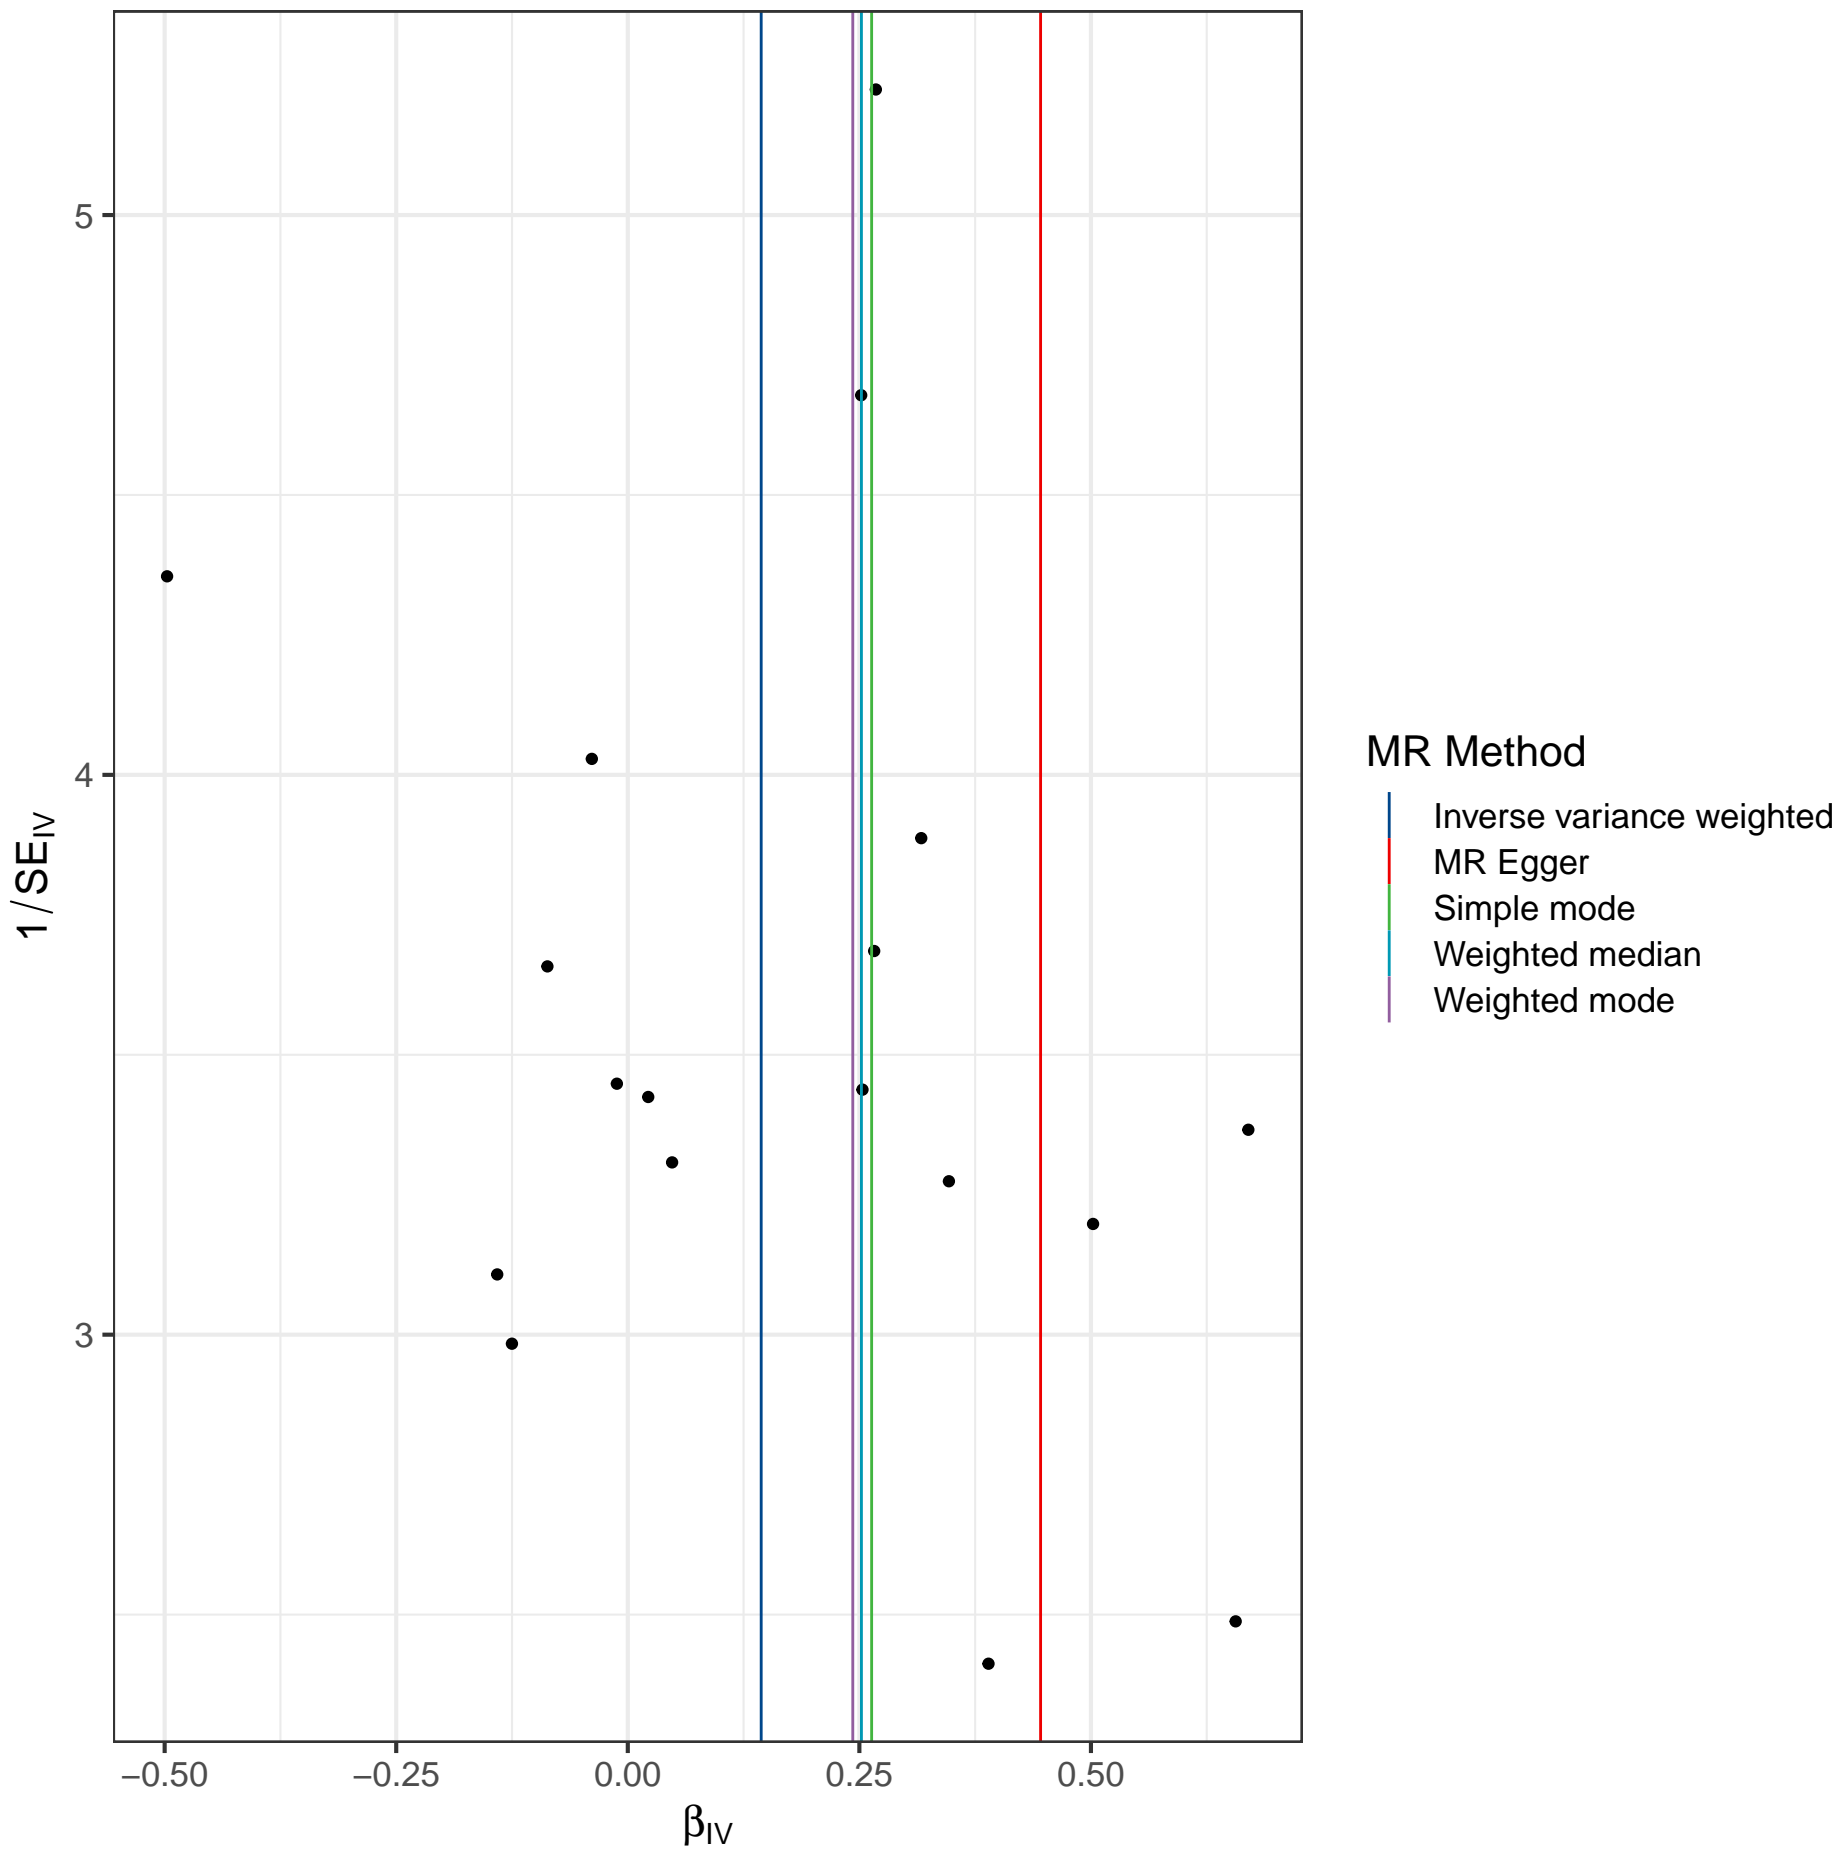

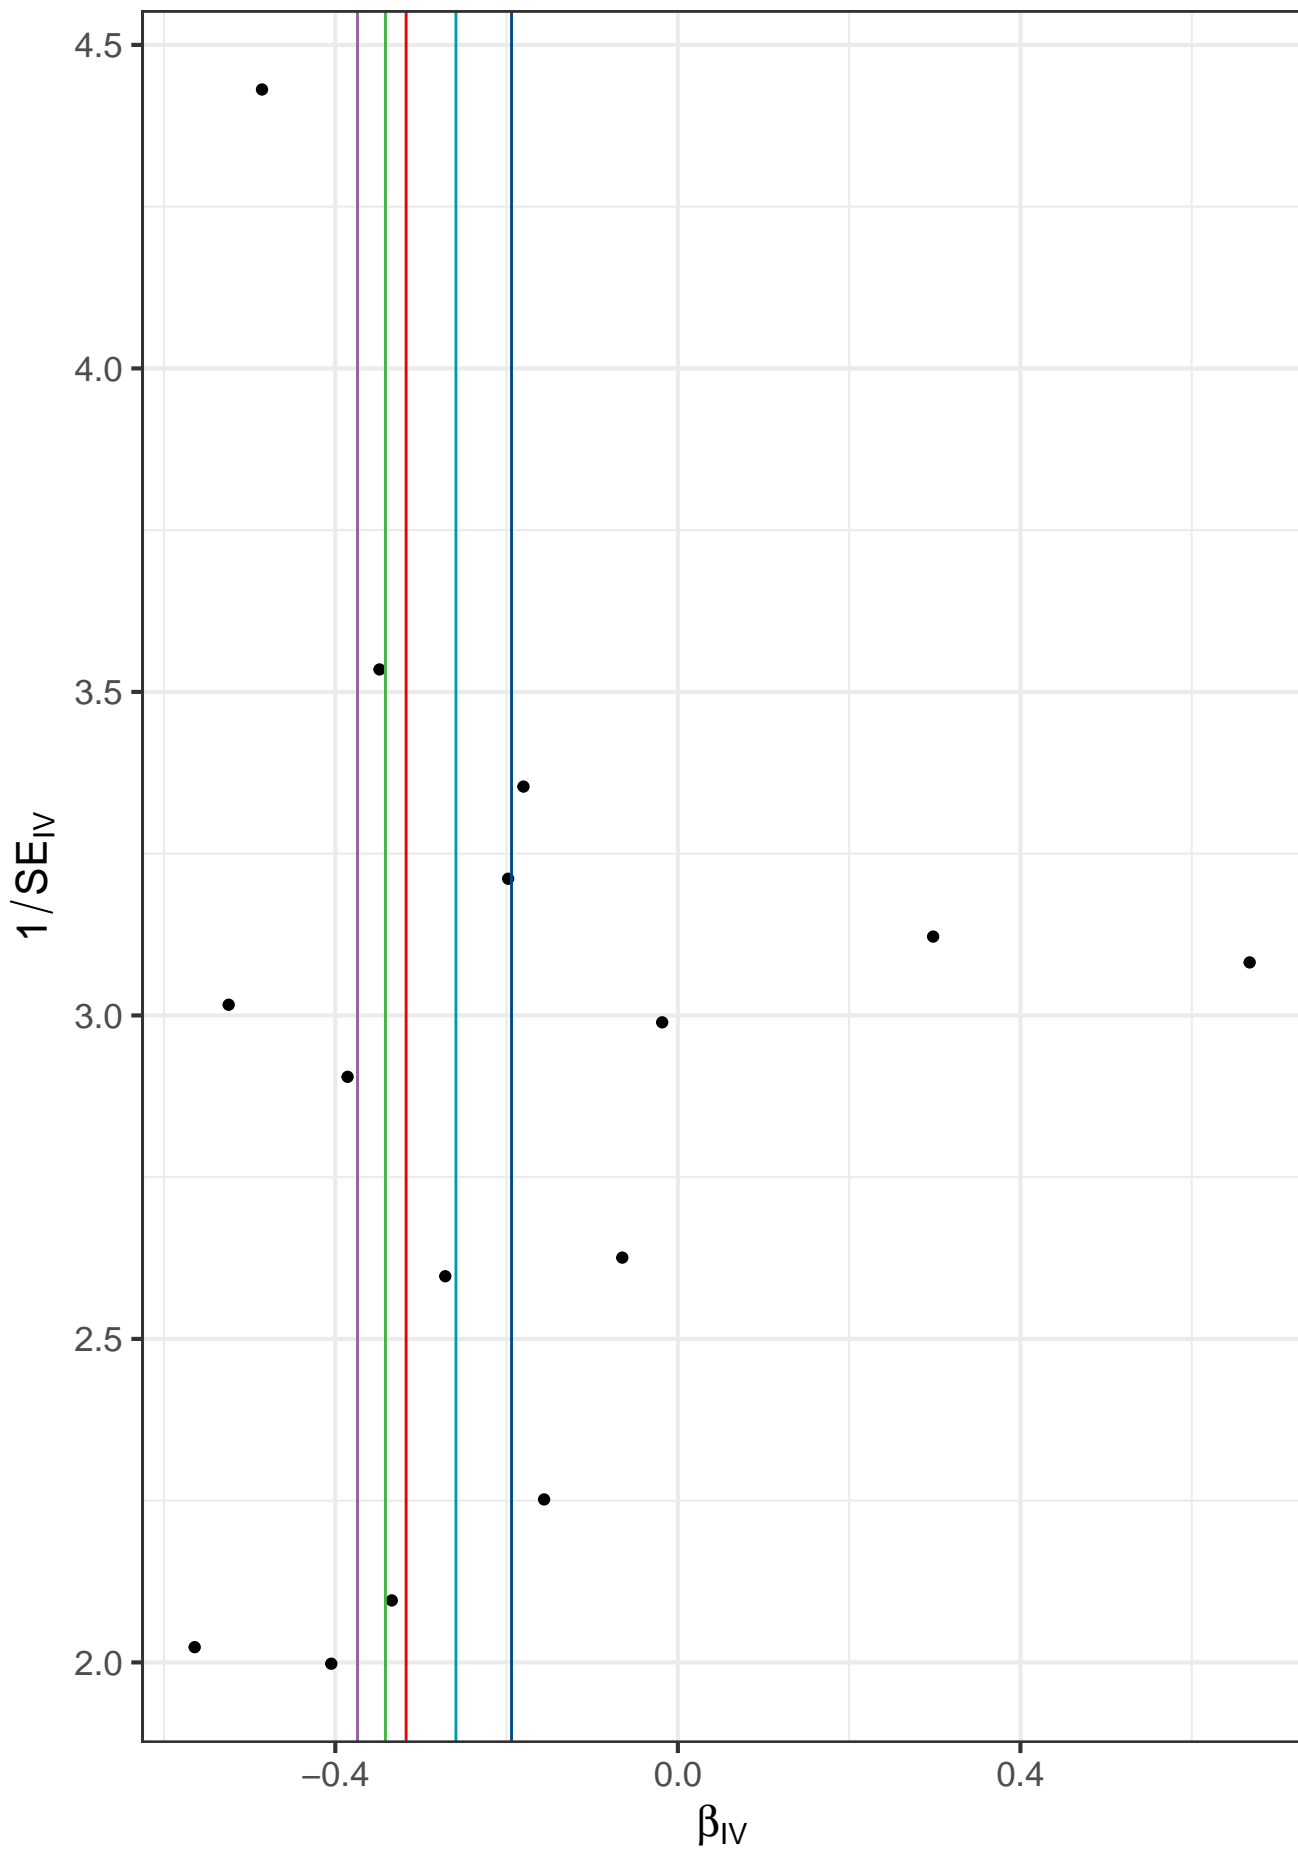

- MR Method
- Inverse variance weighted
  - MR Egger
  - Simple mode
  - Weighted median
  - Weighted mode

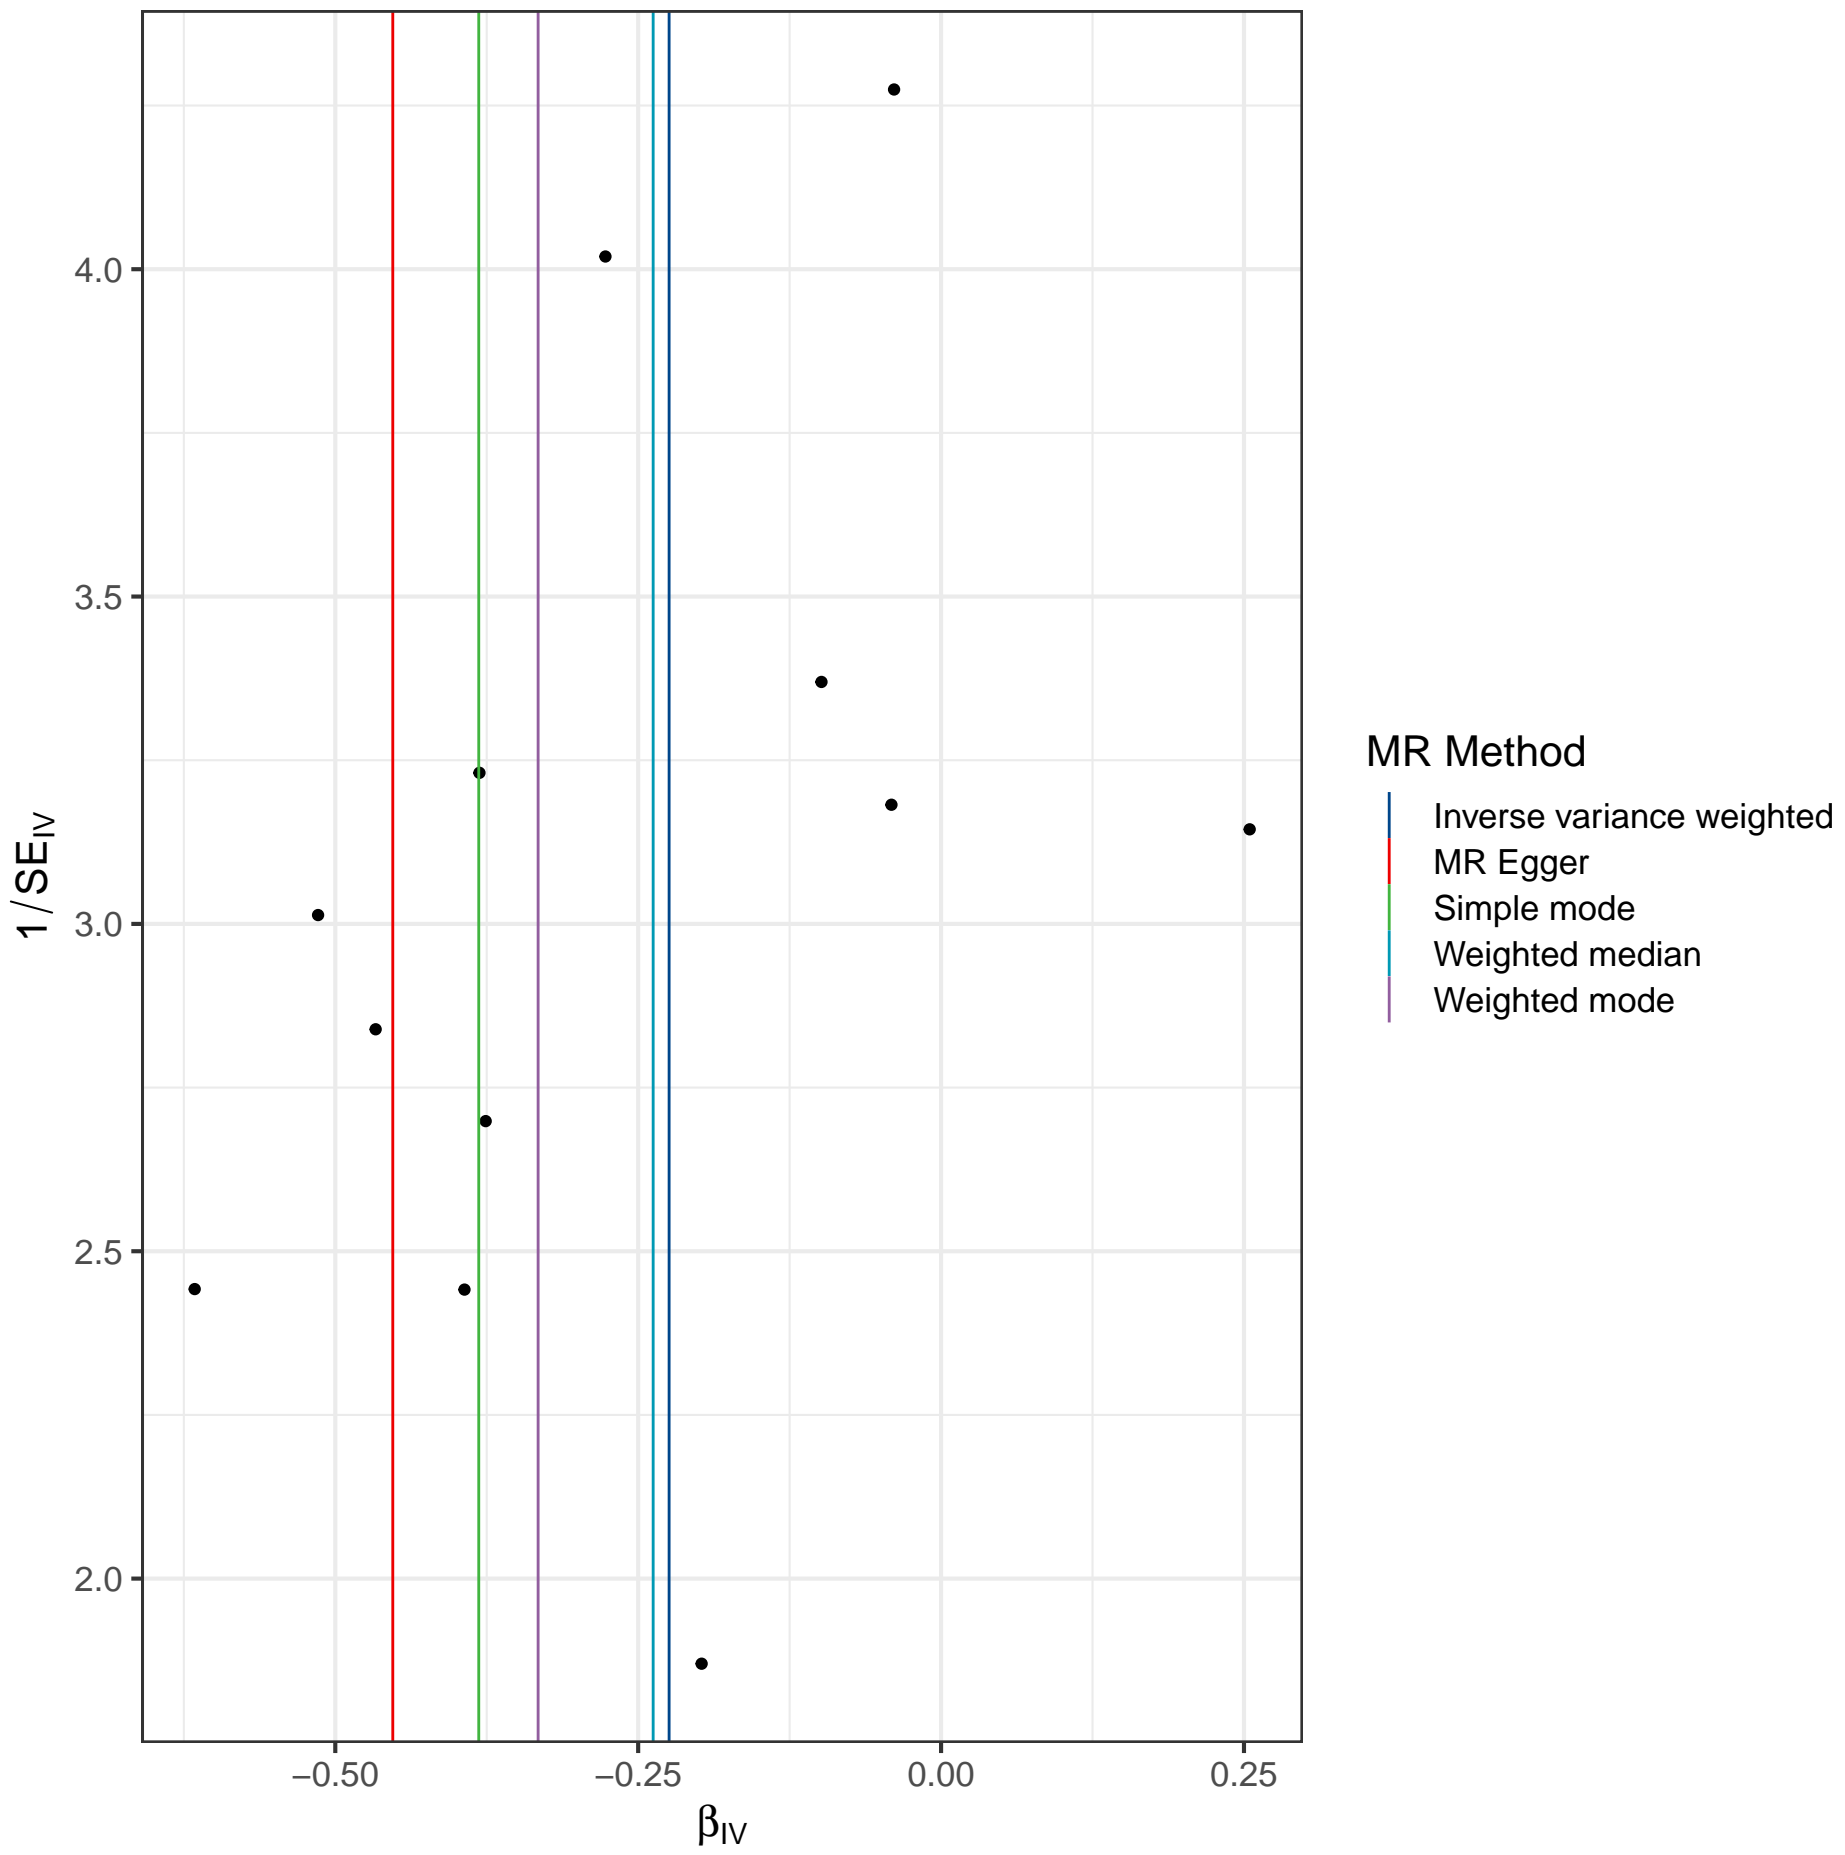



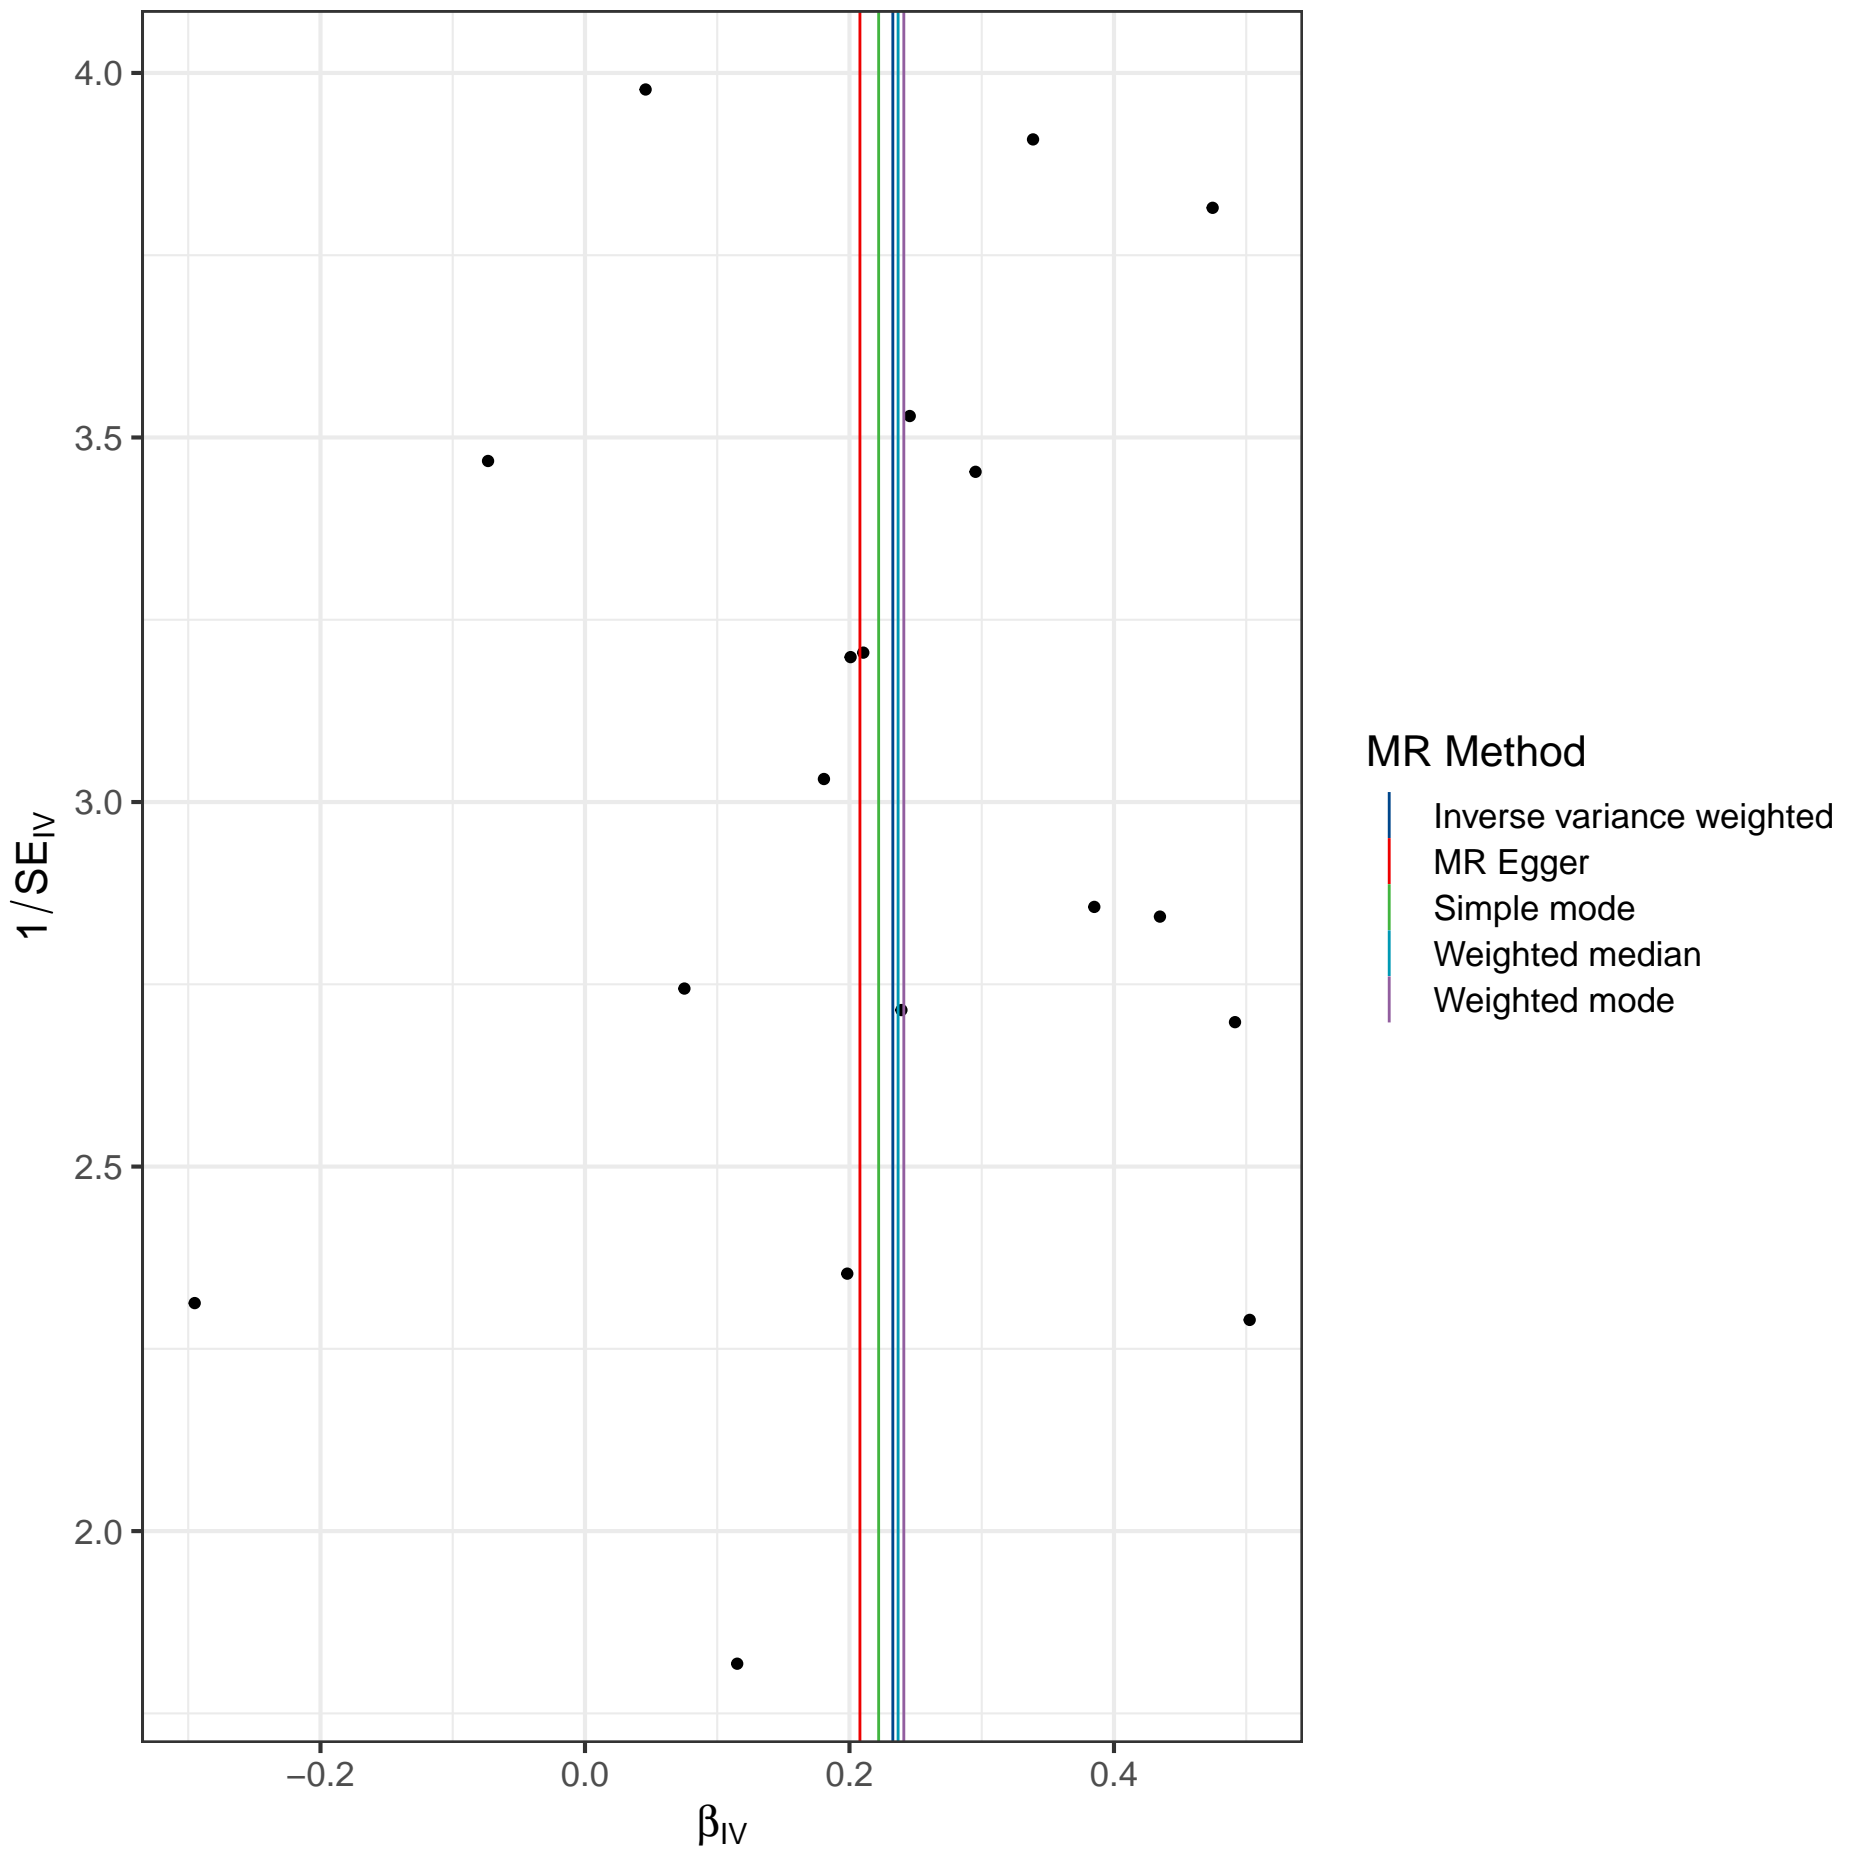

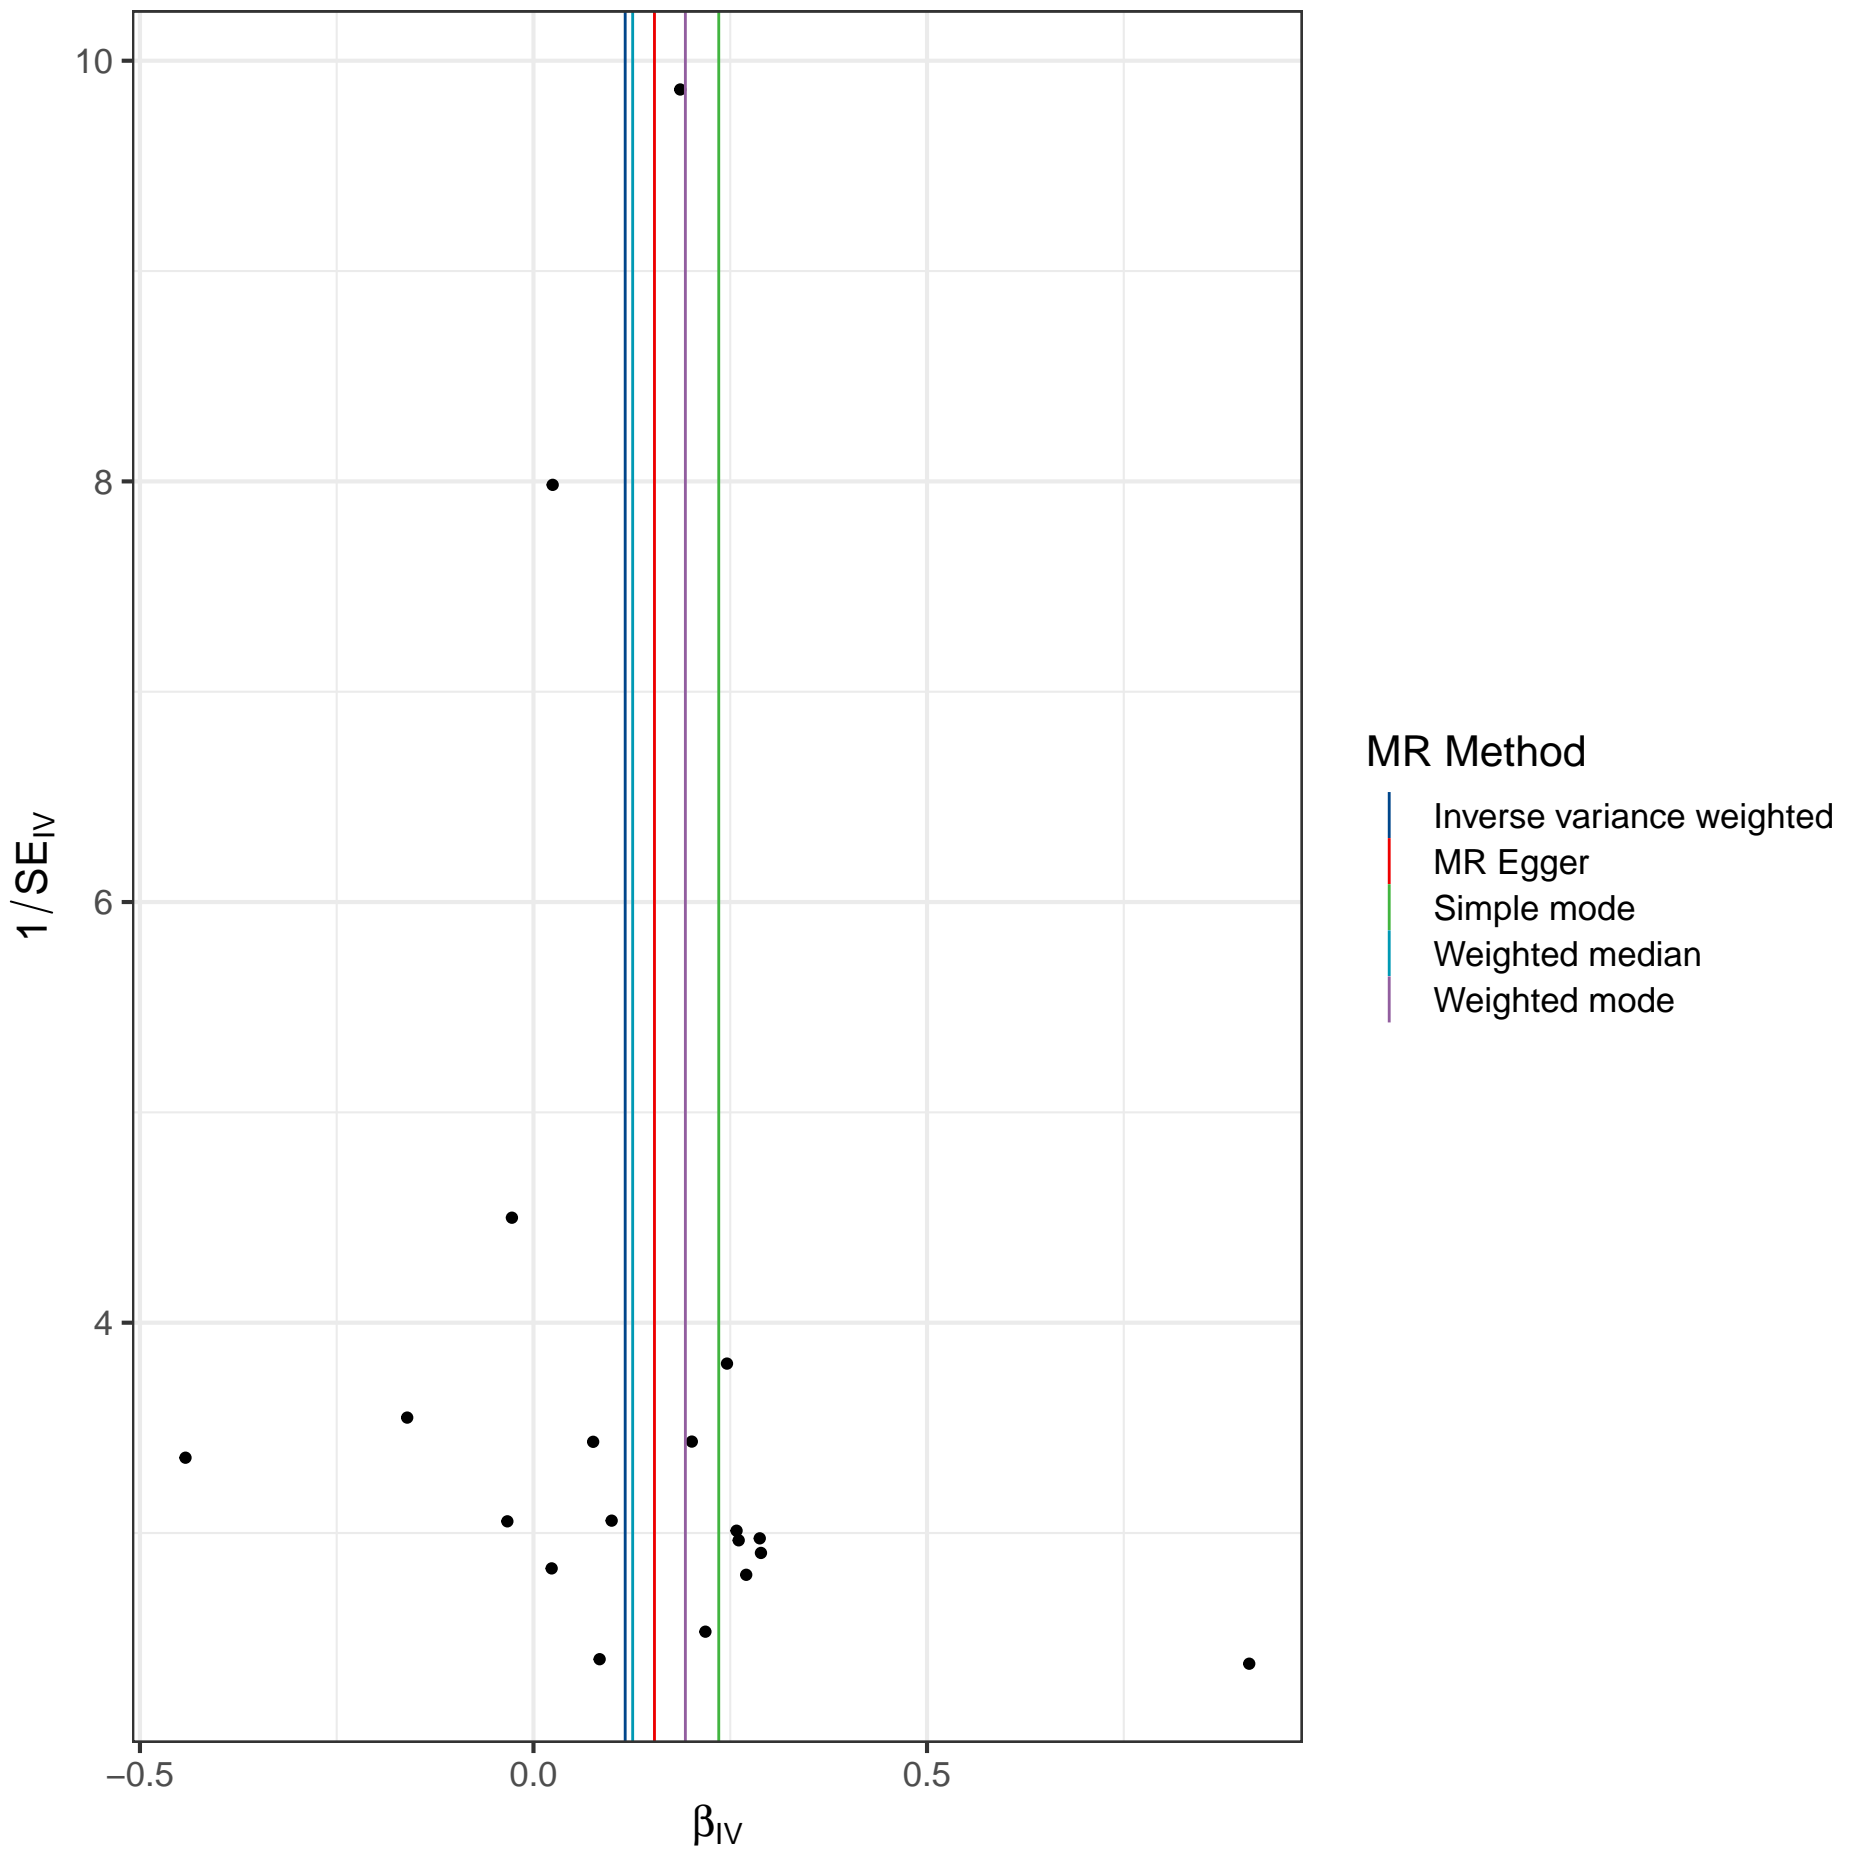

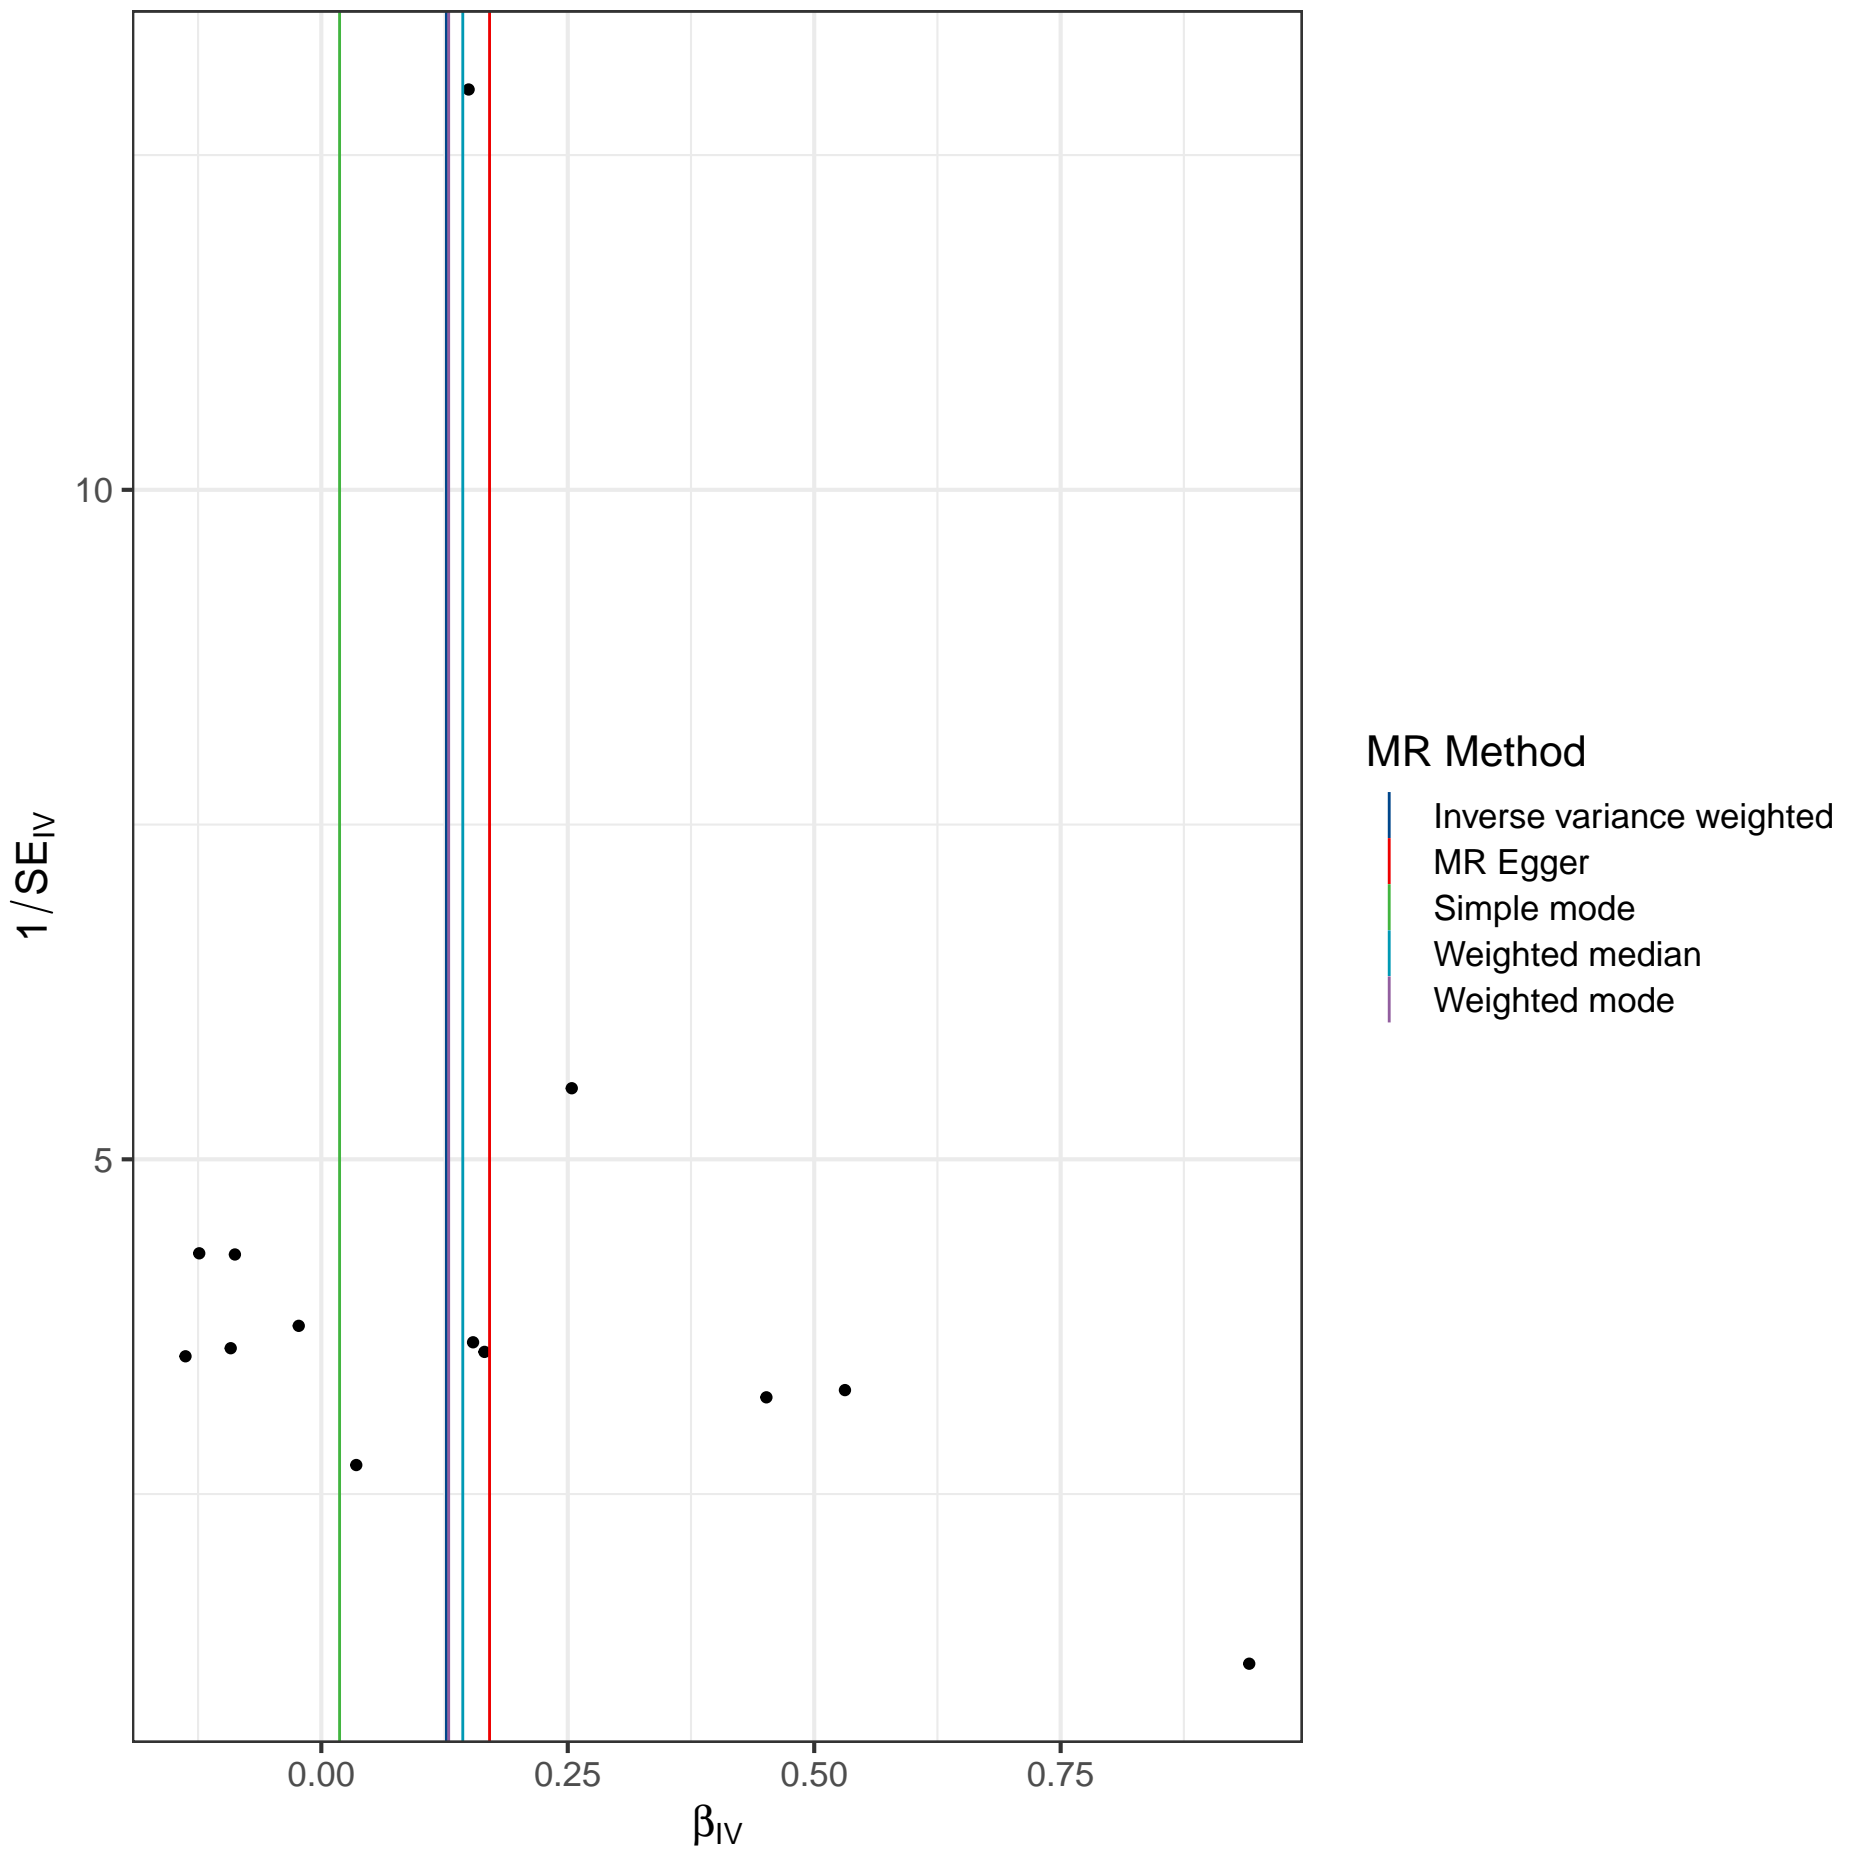

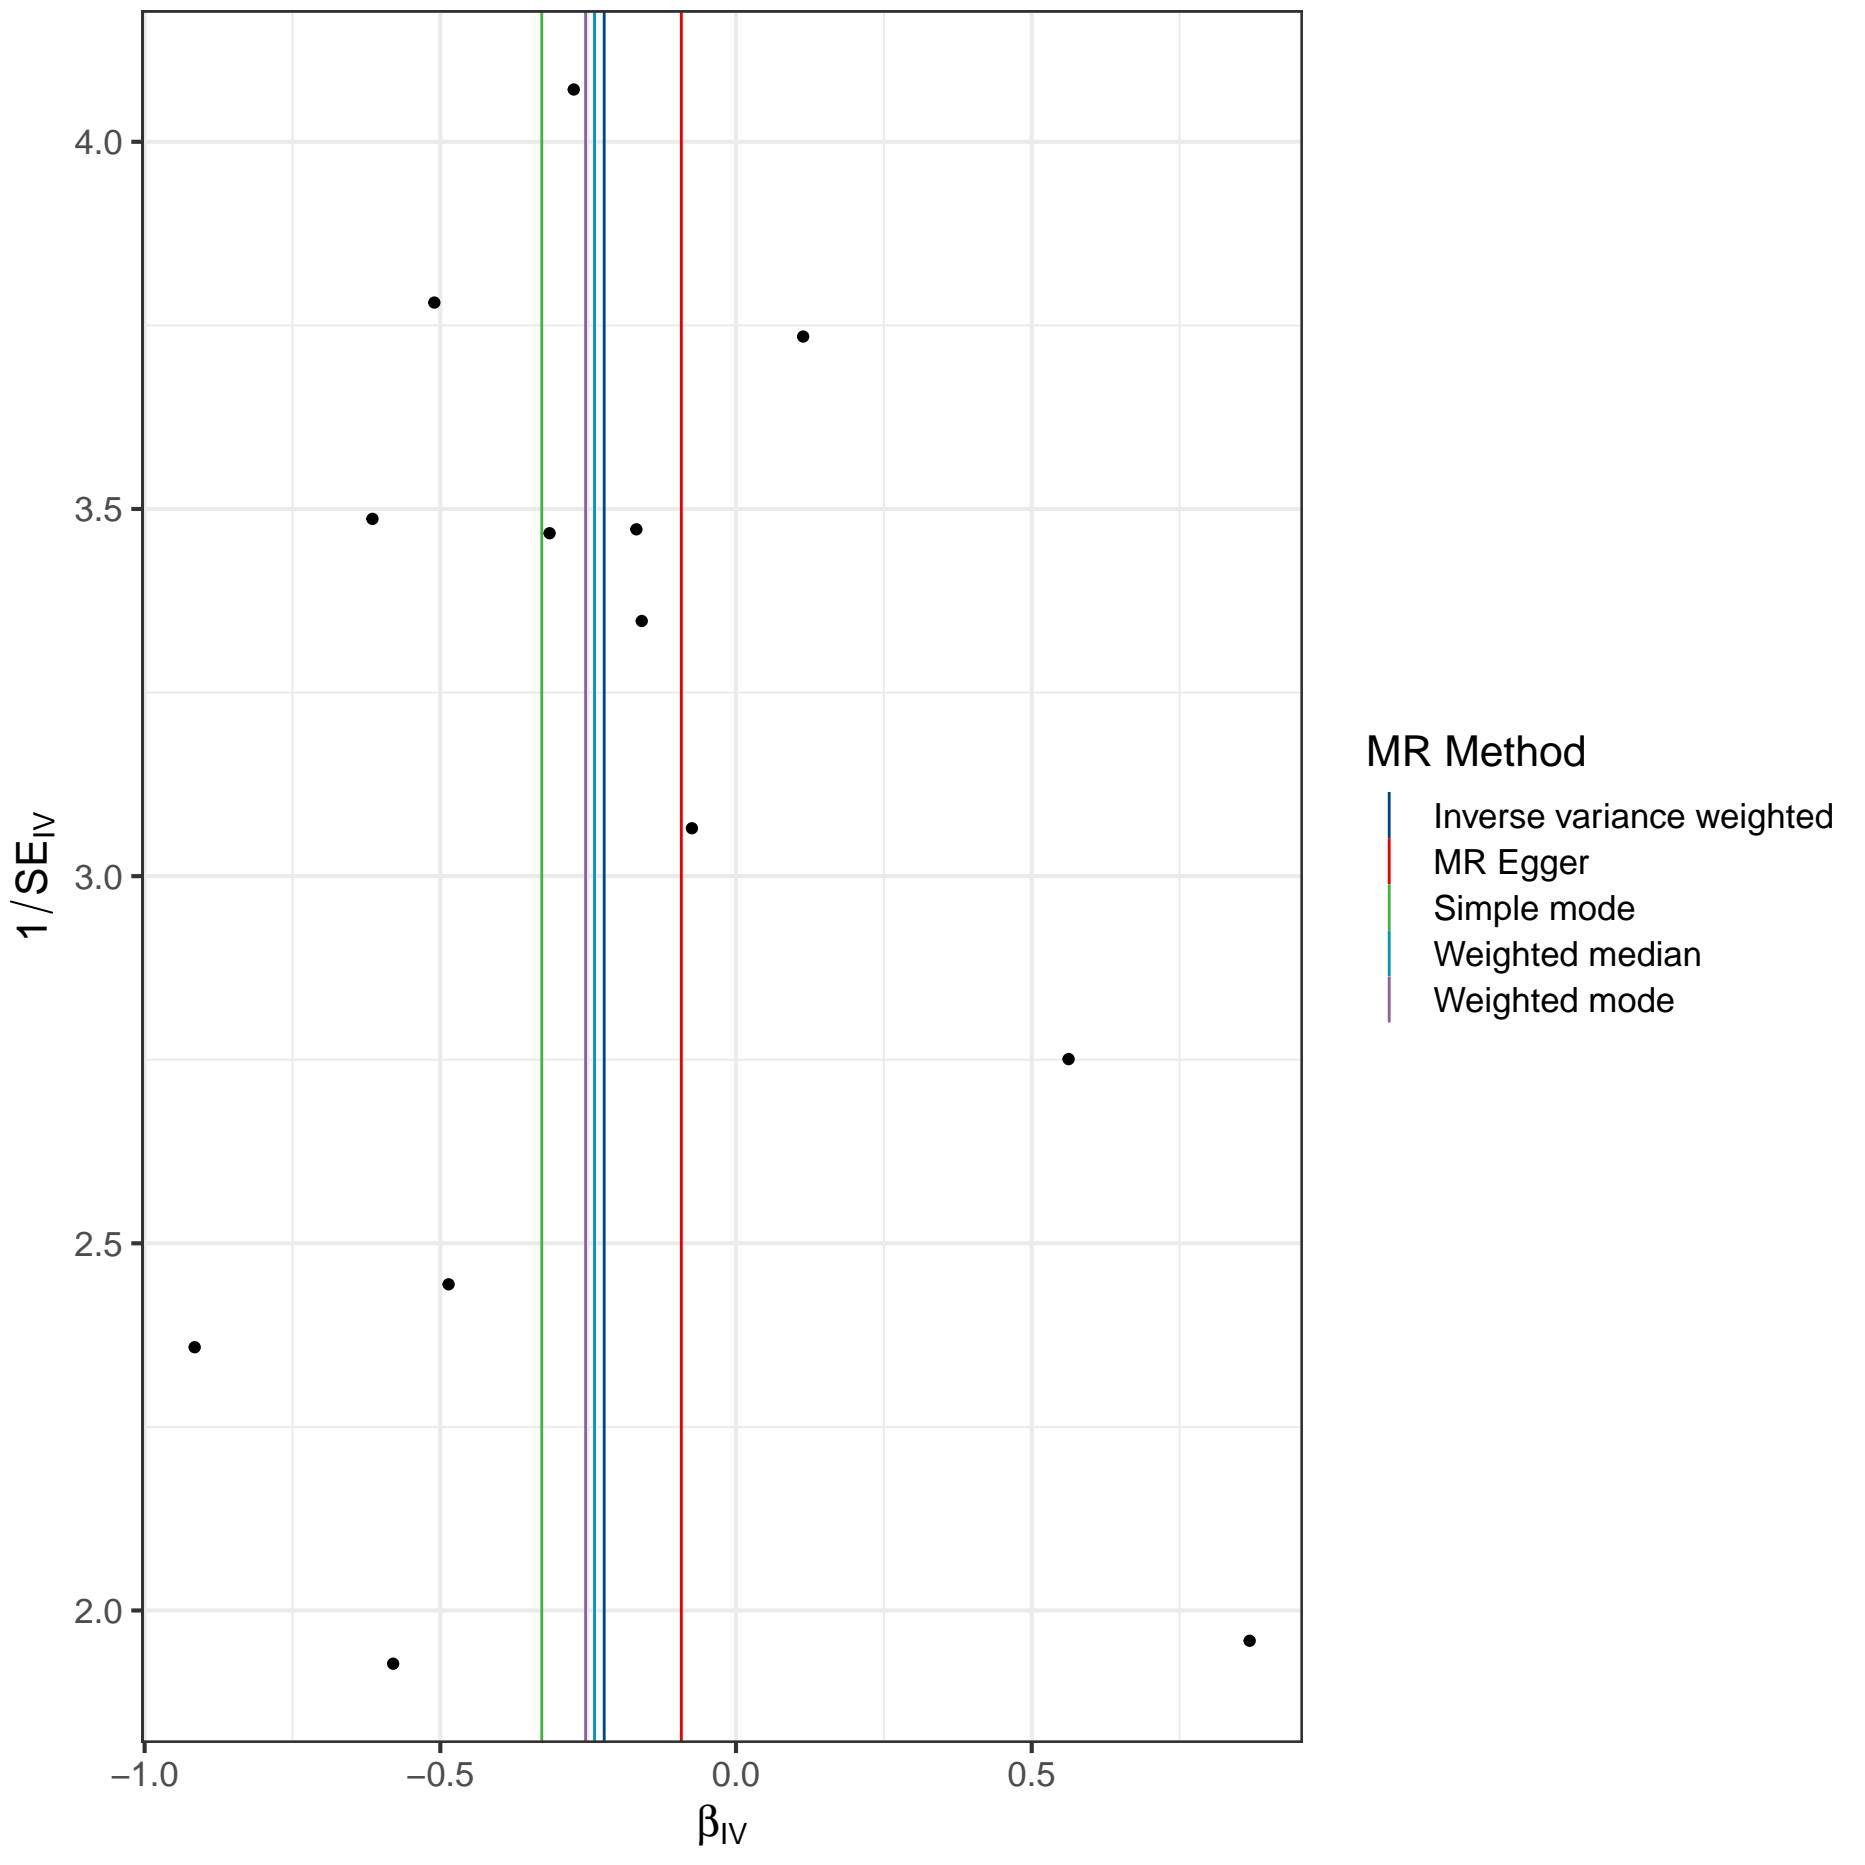

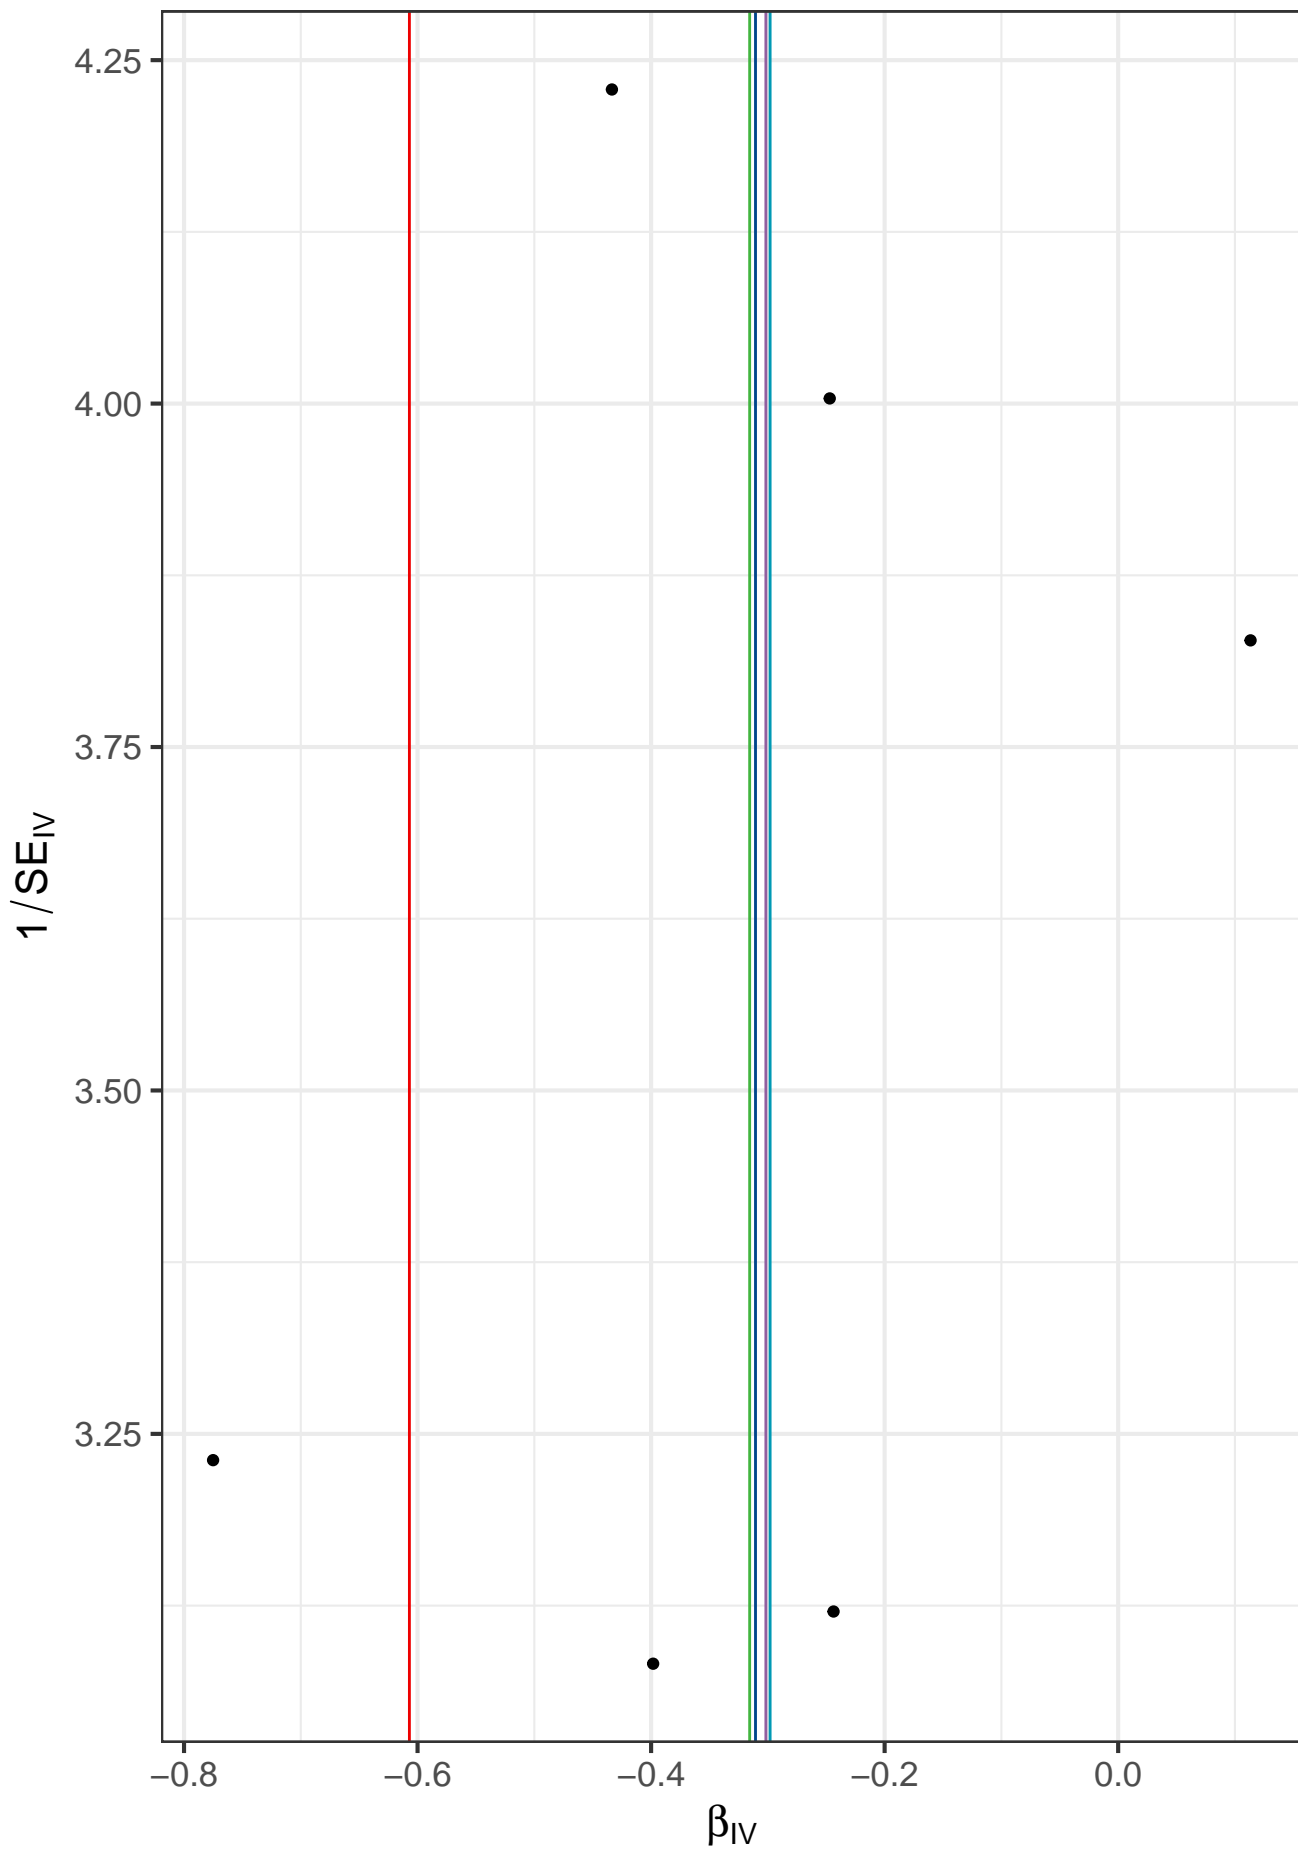

MR Method

- Inverse variance weighted
- MR Egger
- Simple mode
- Weighted median
- Weighted mode

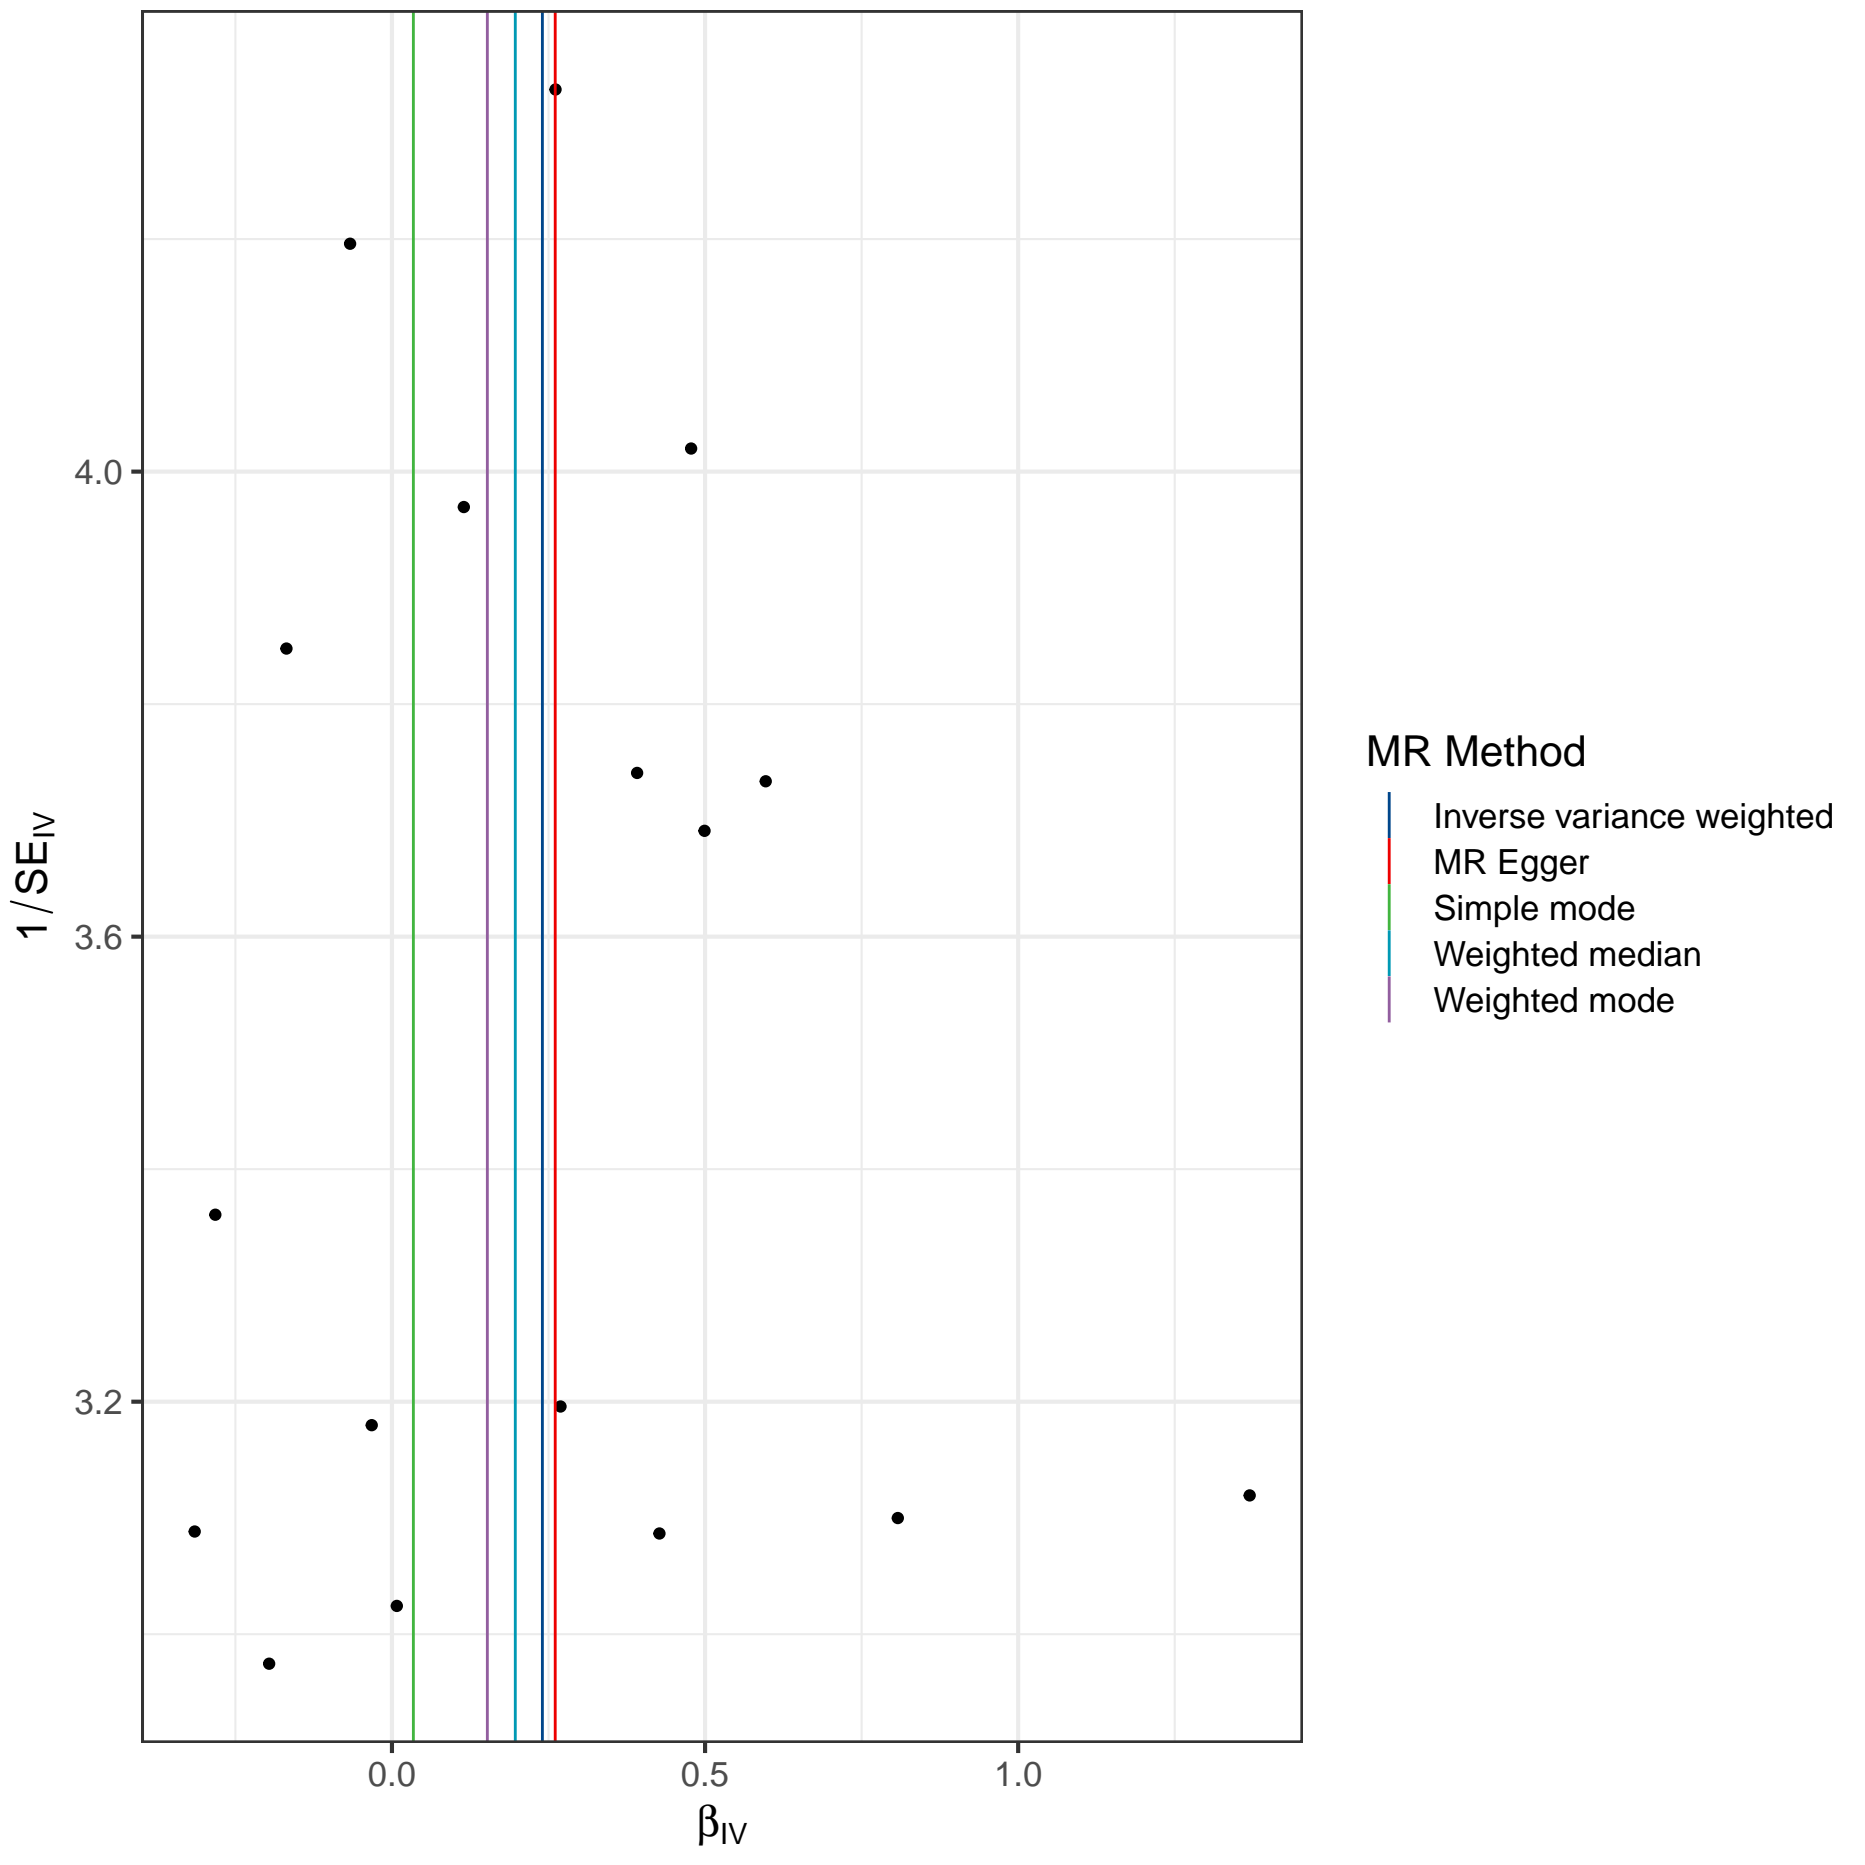

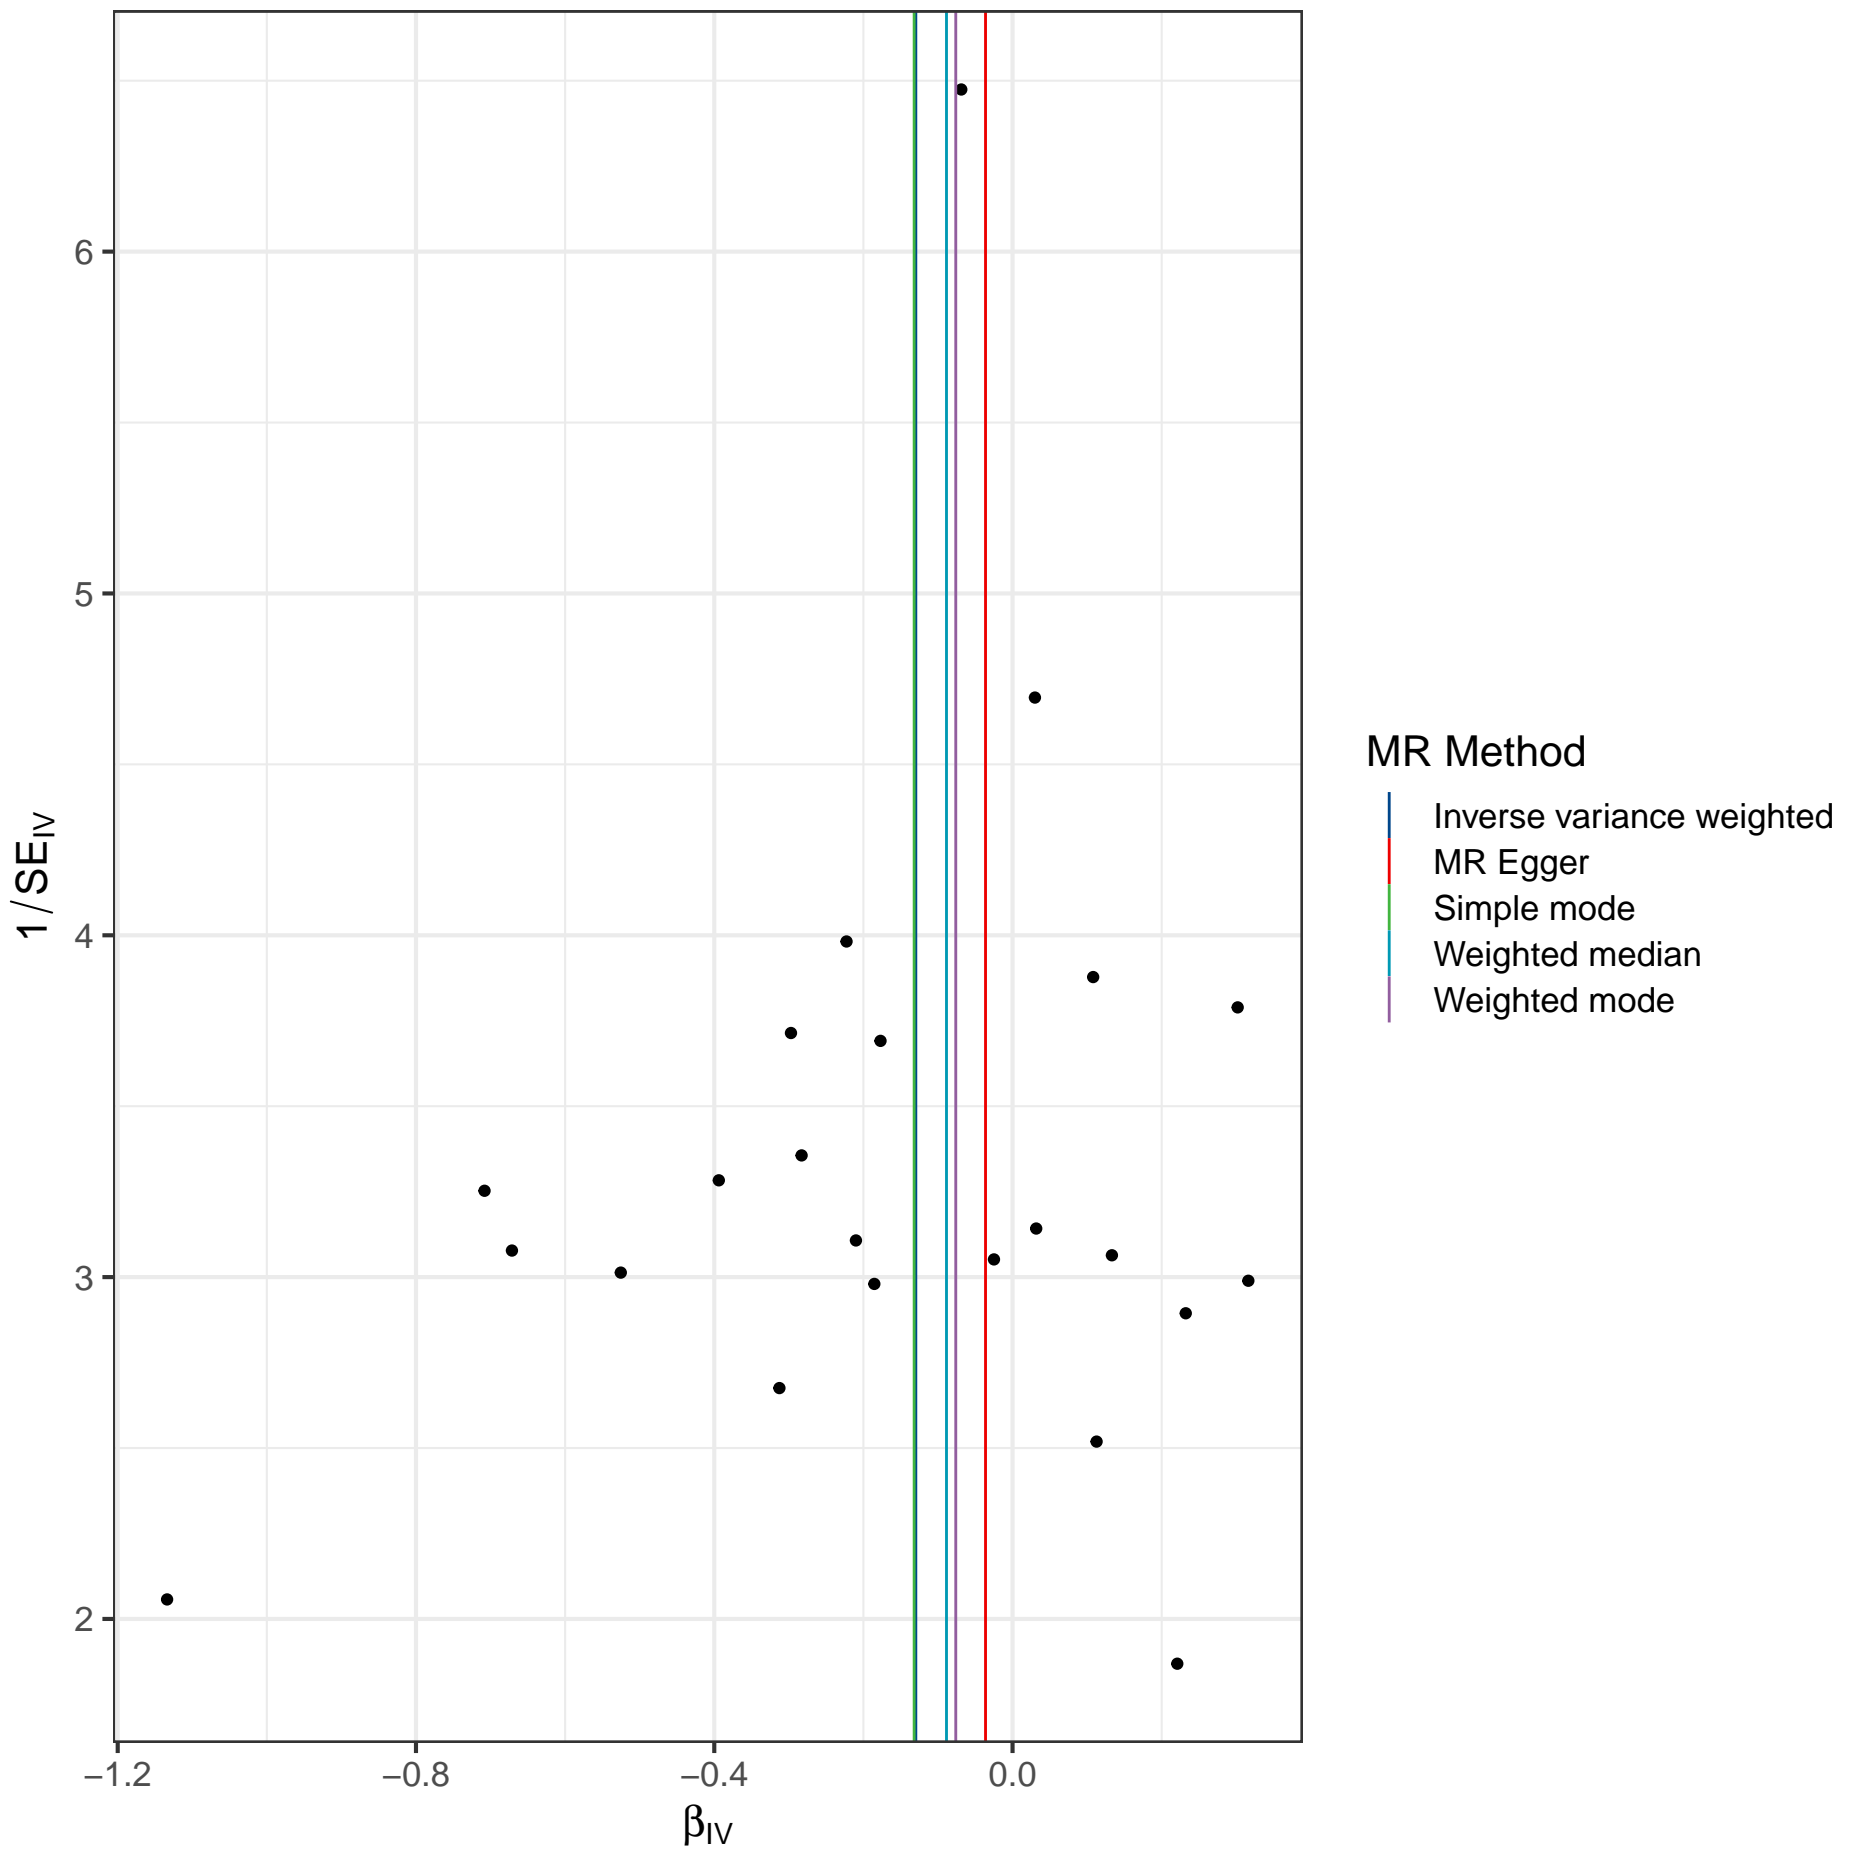

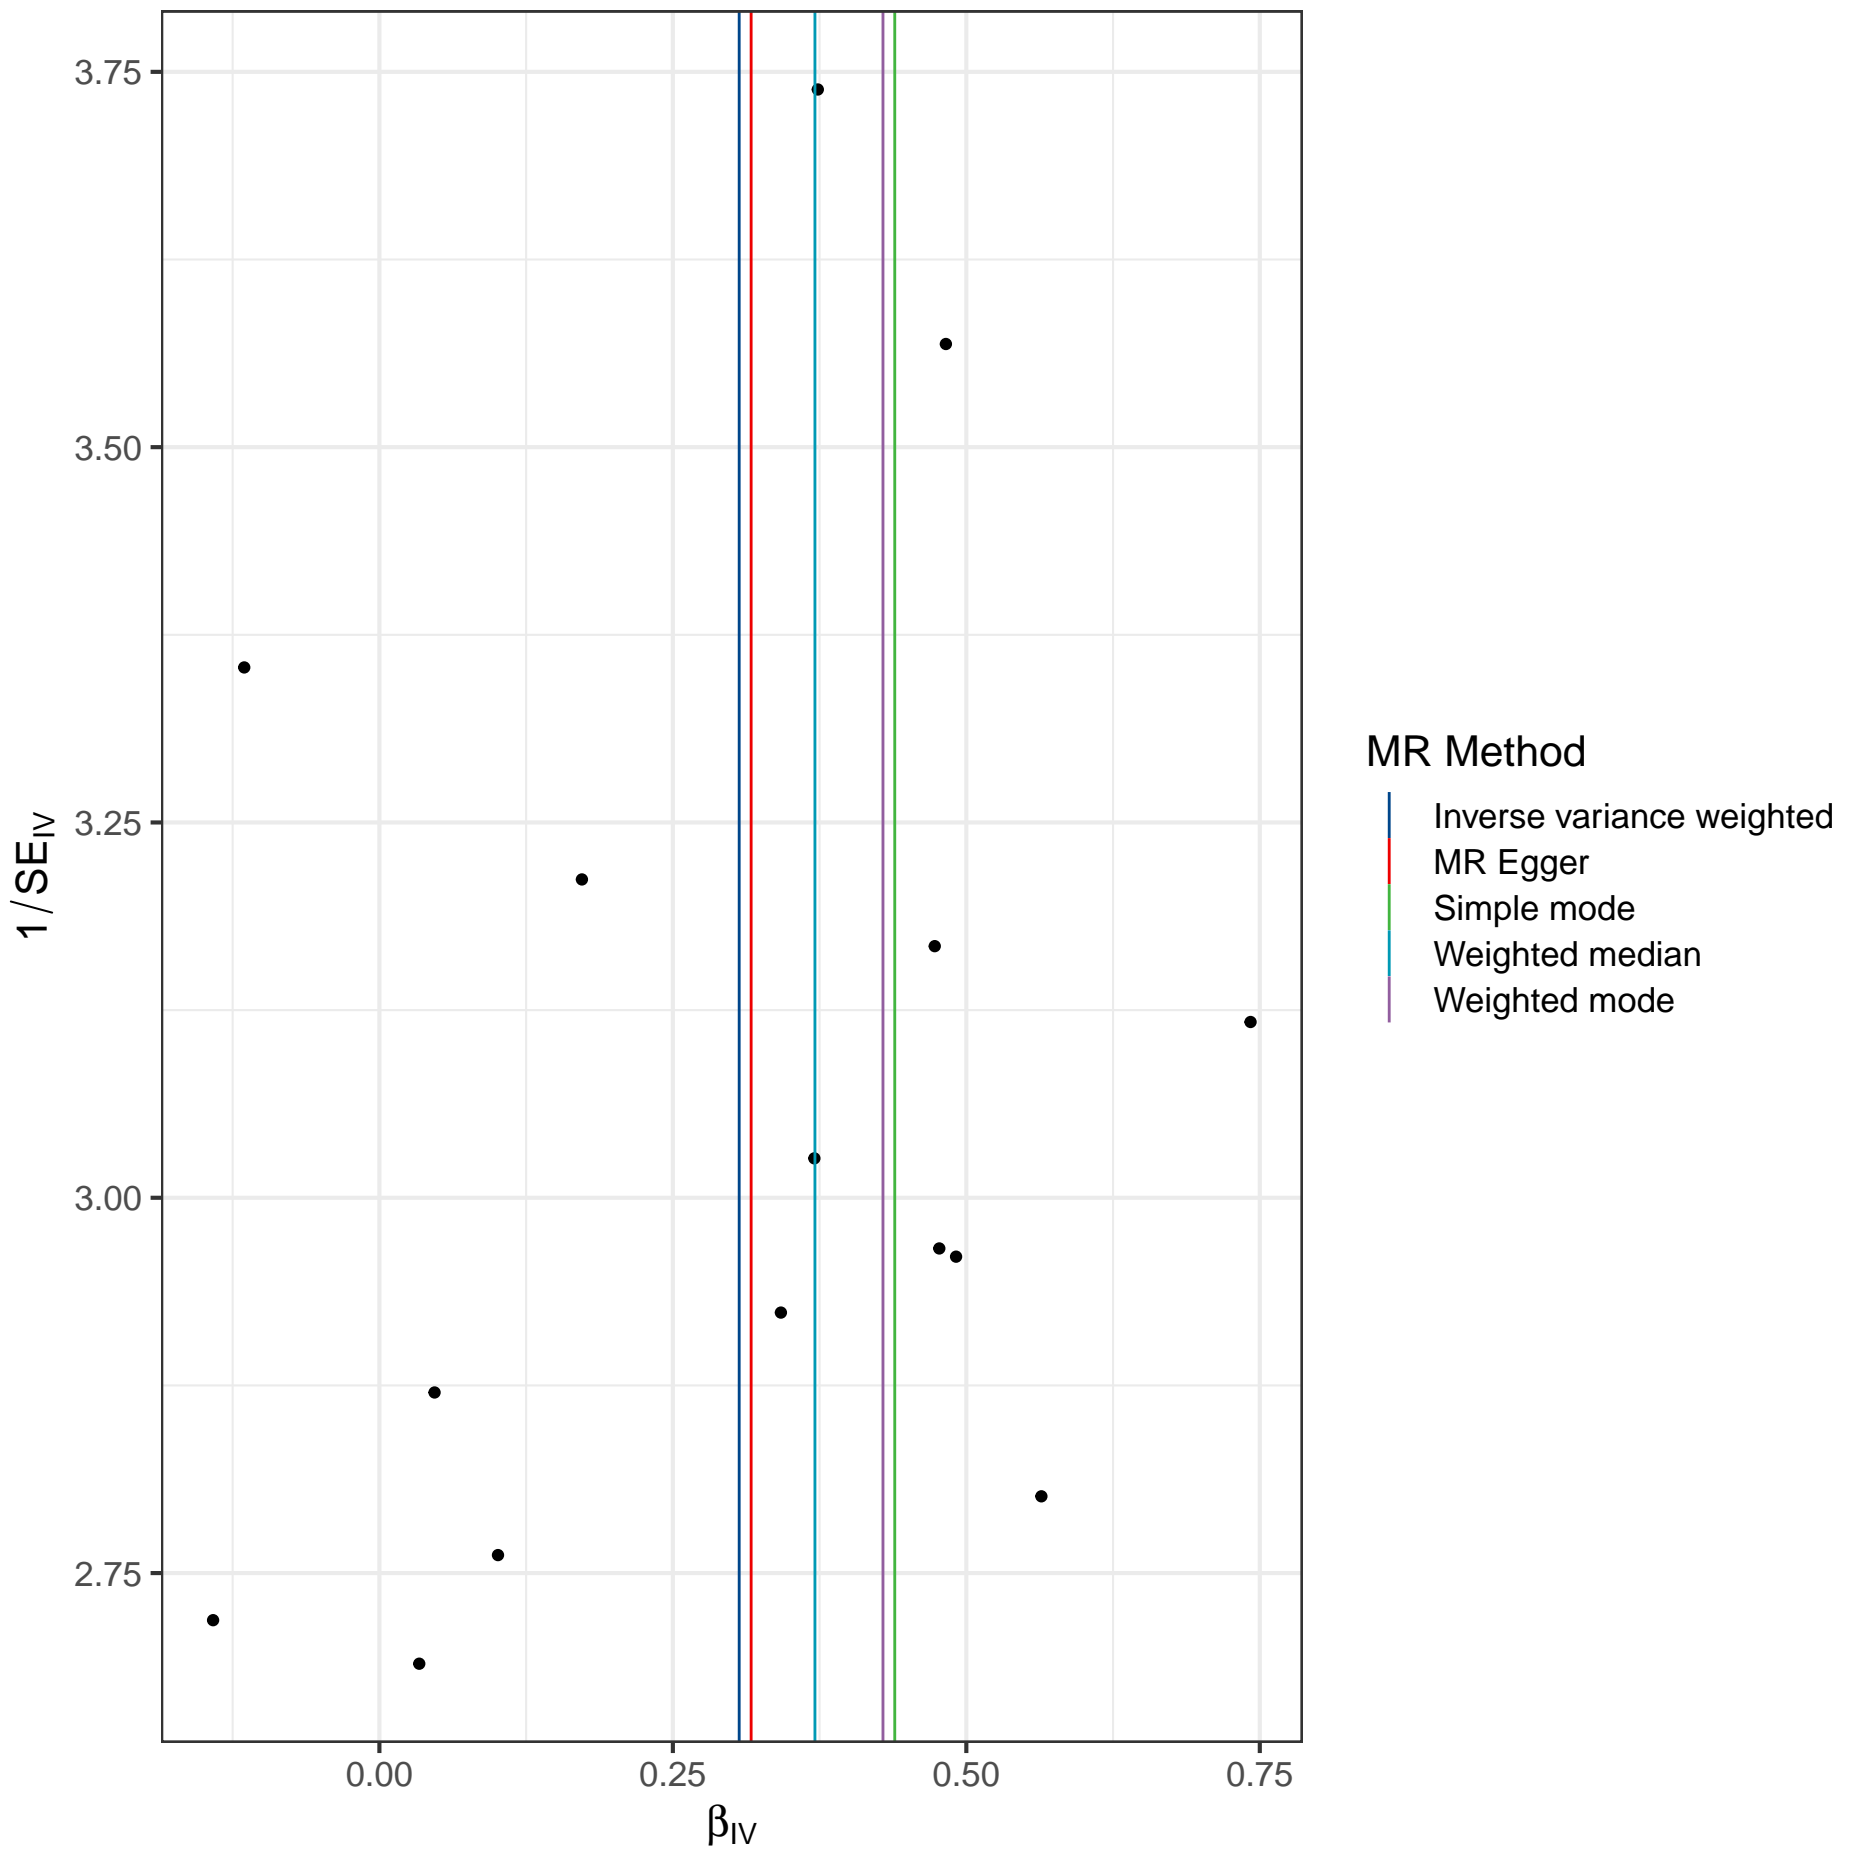



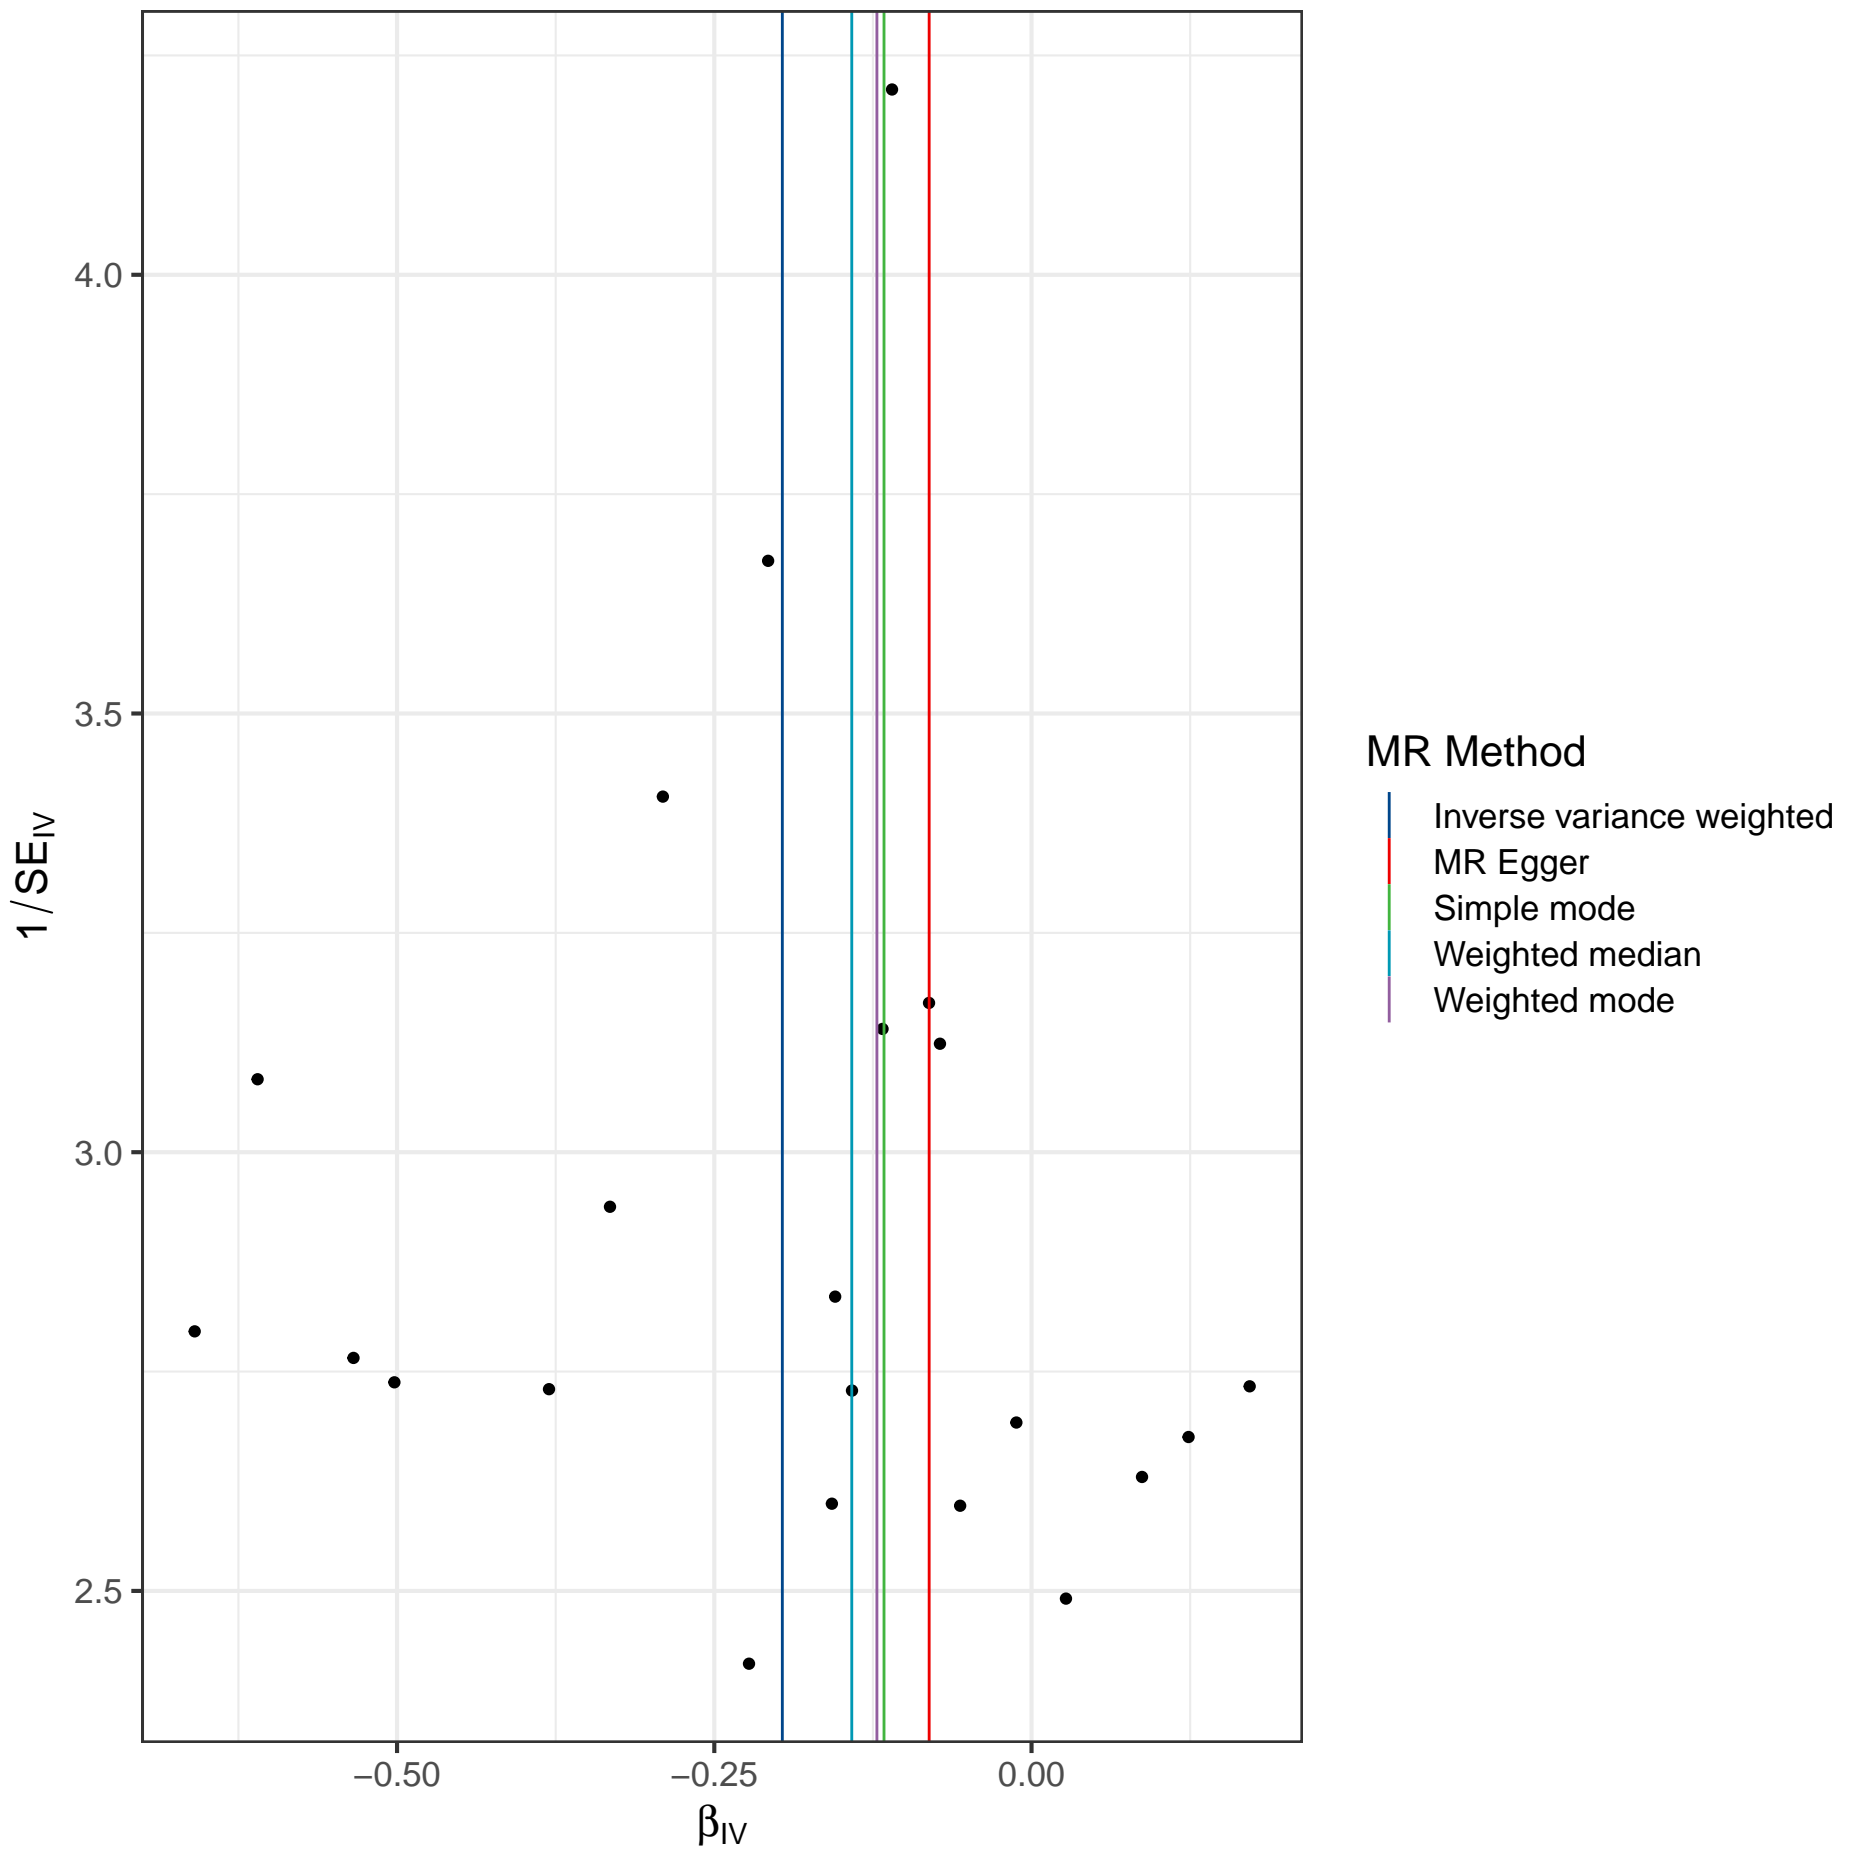

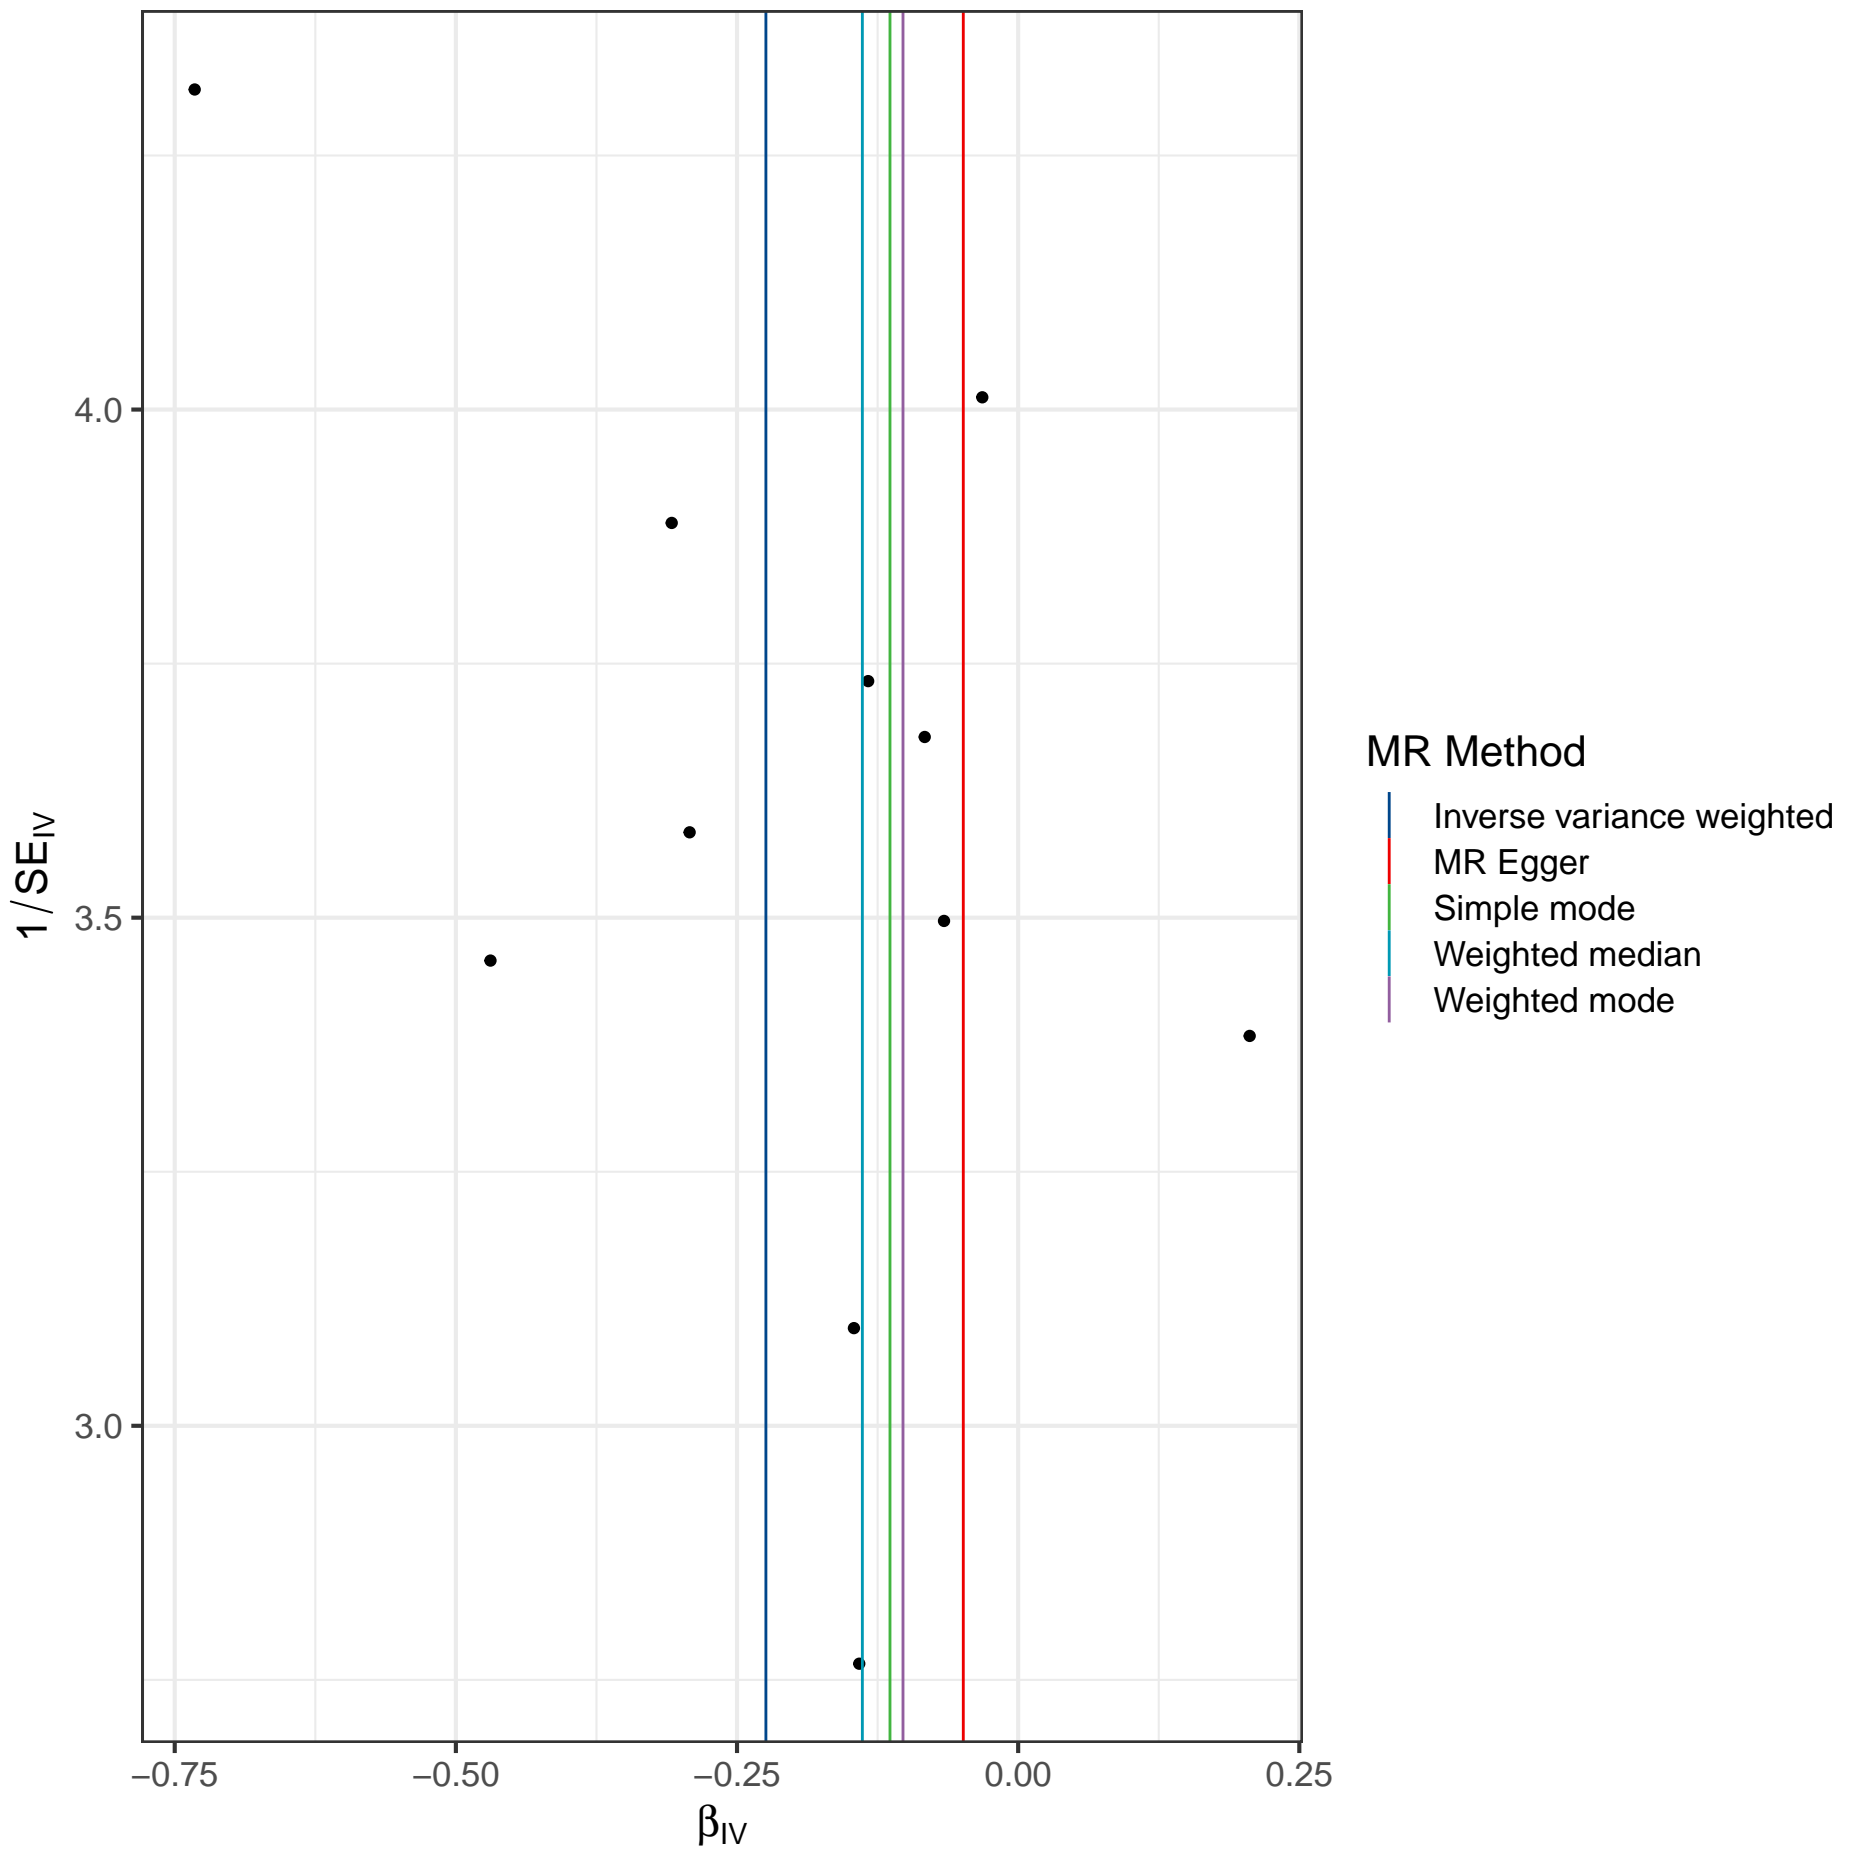

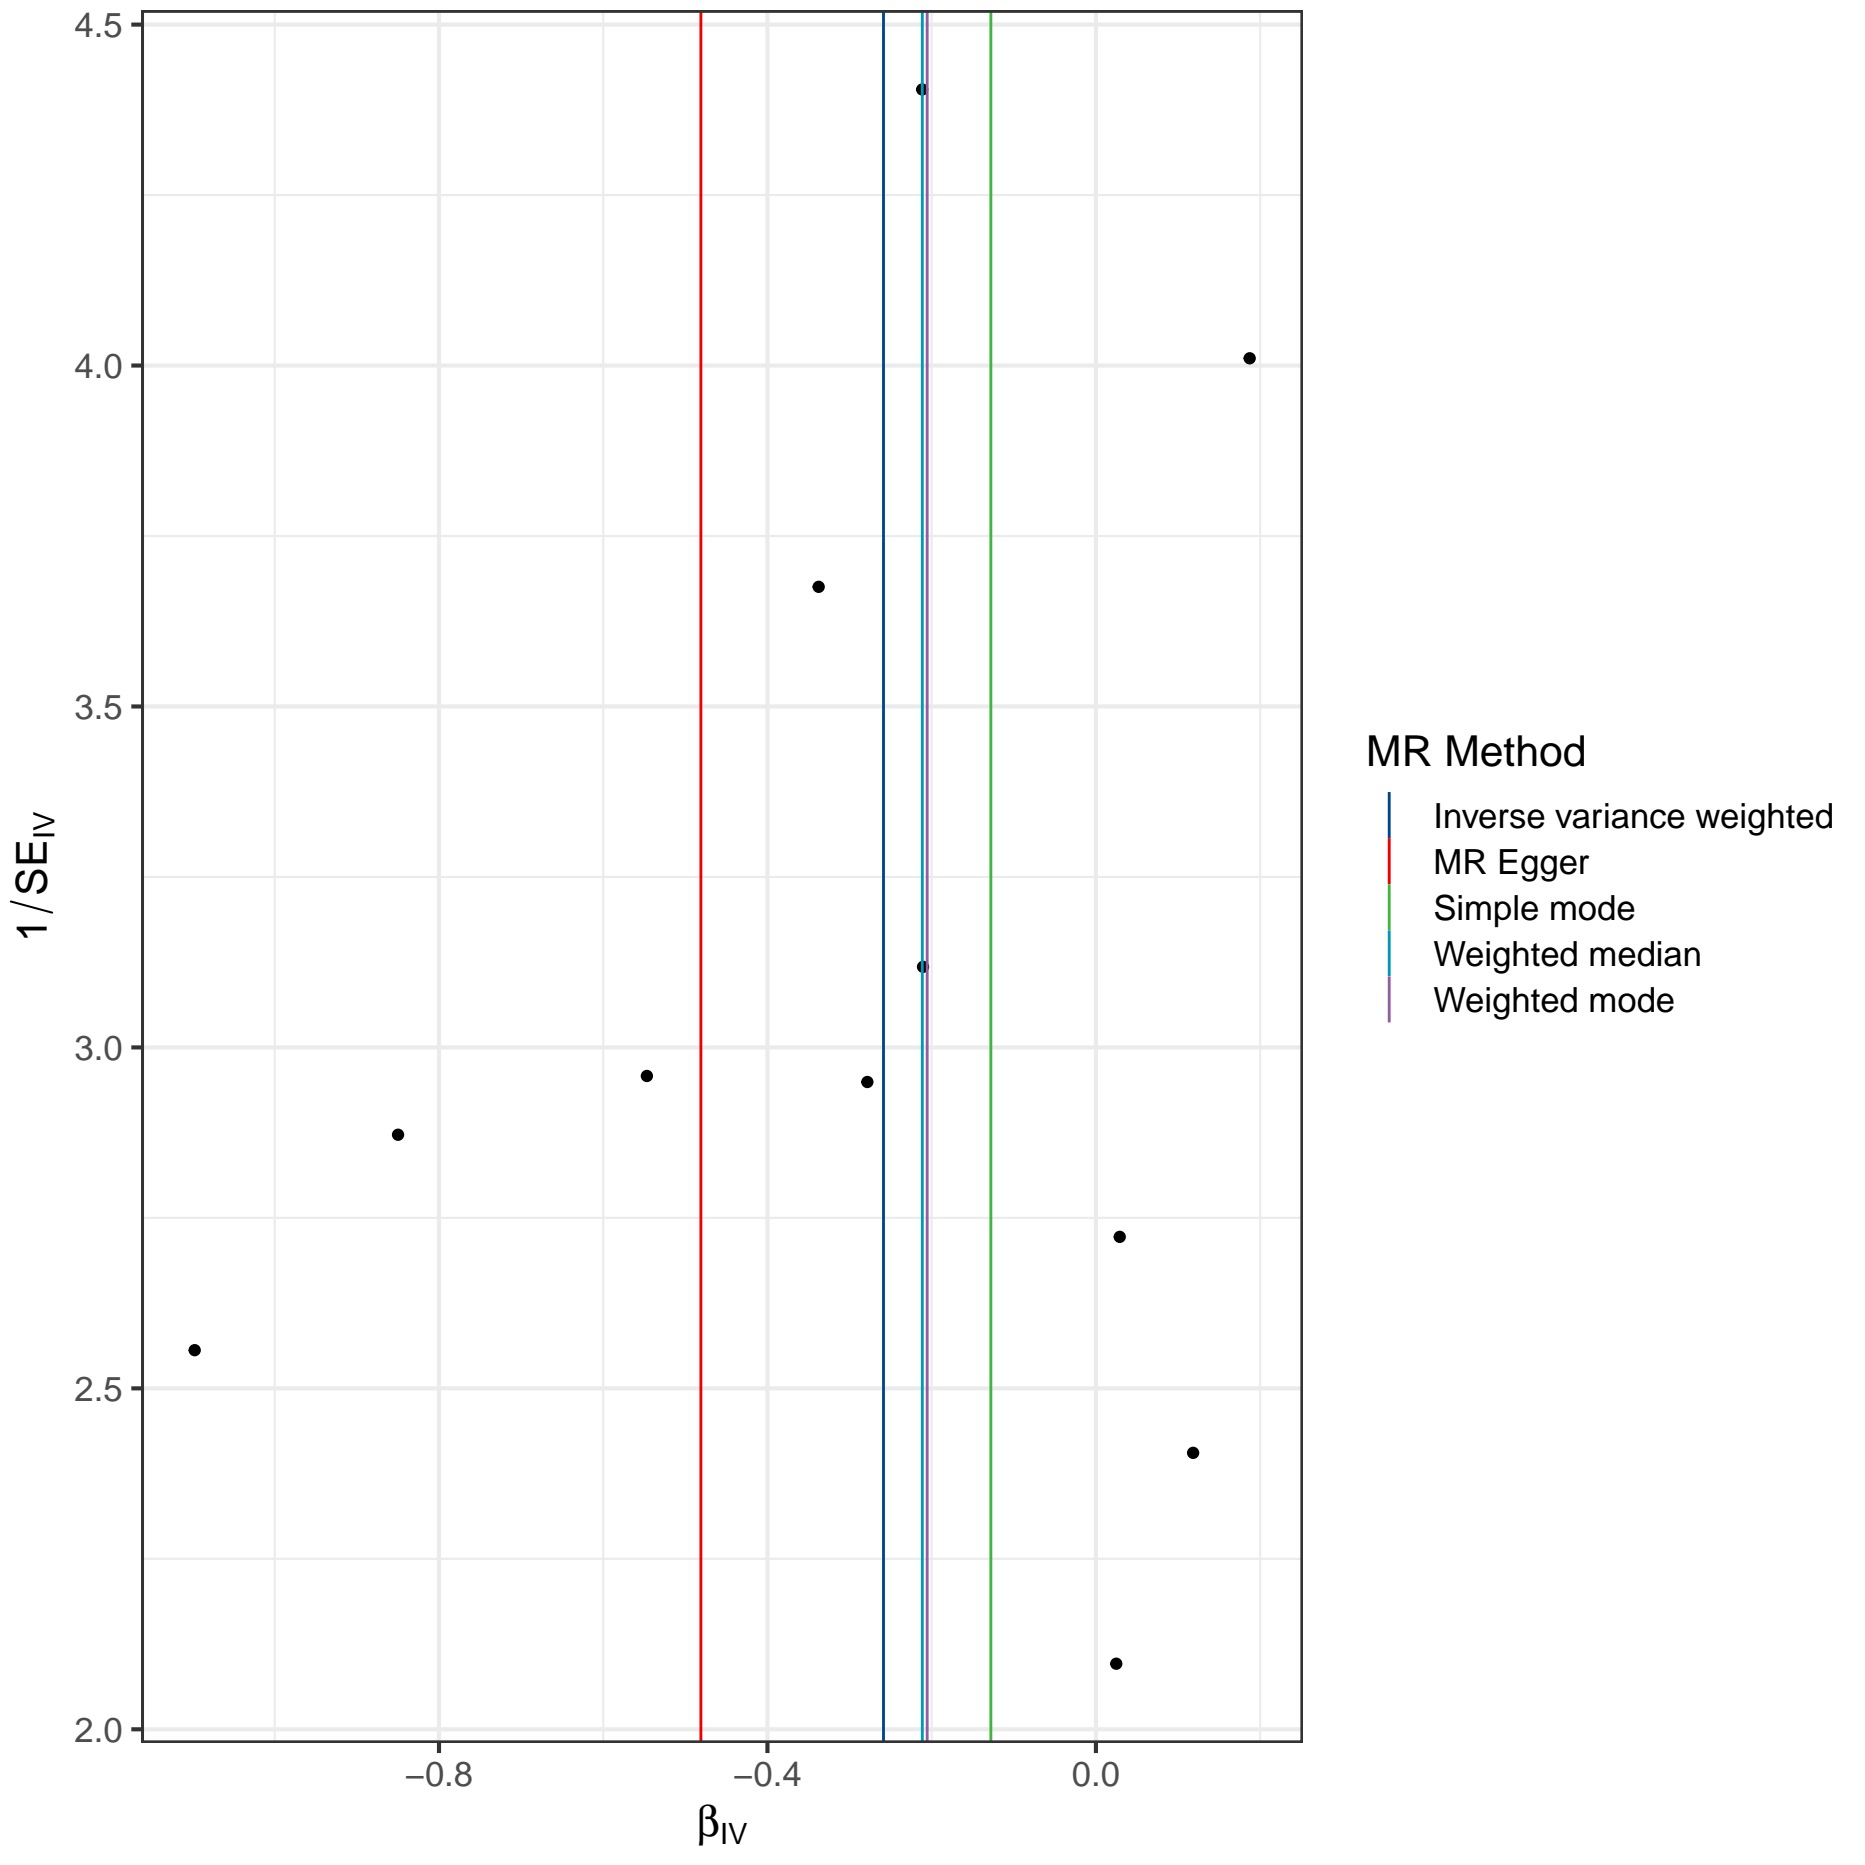

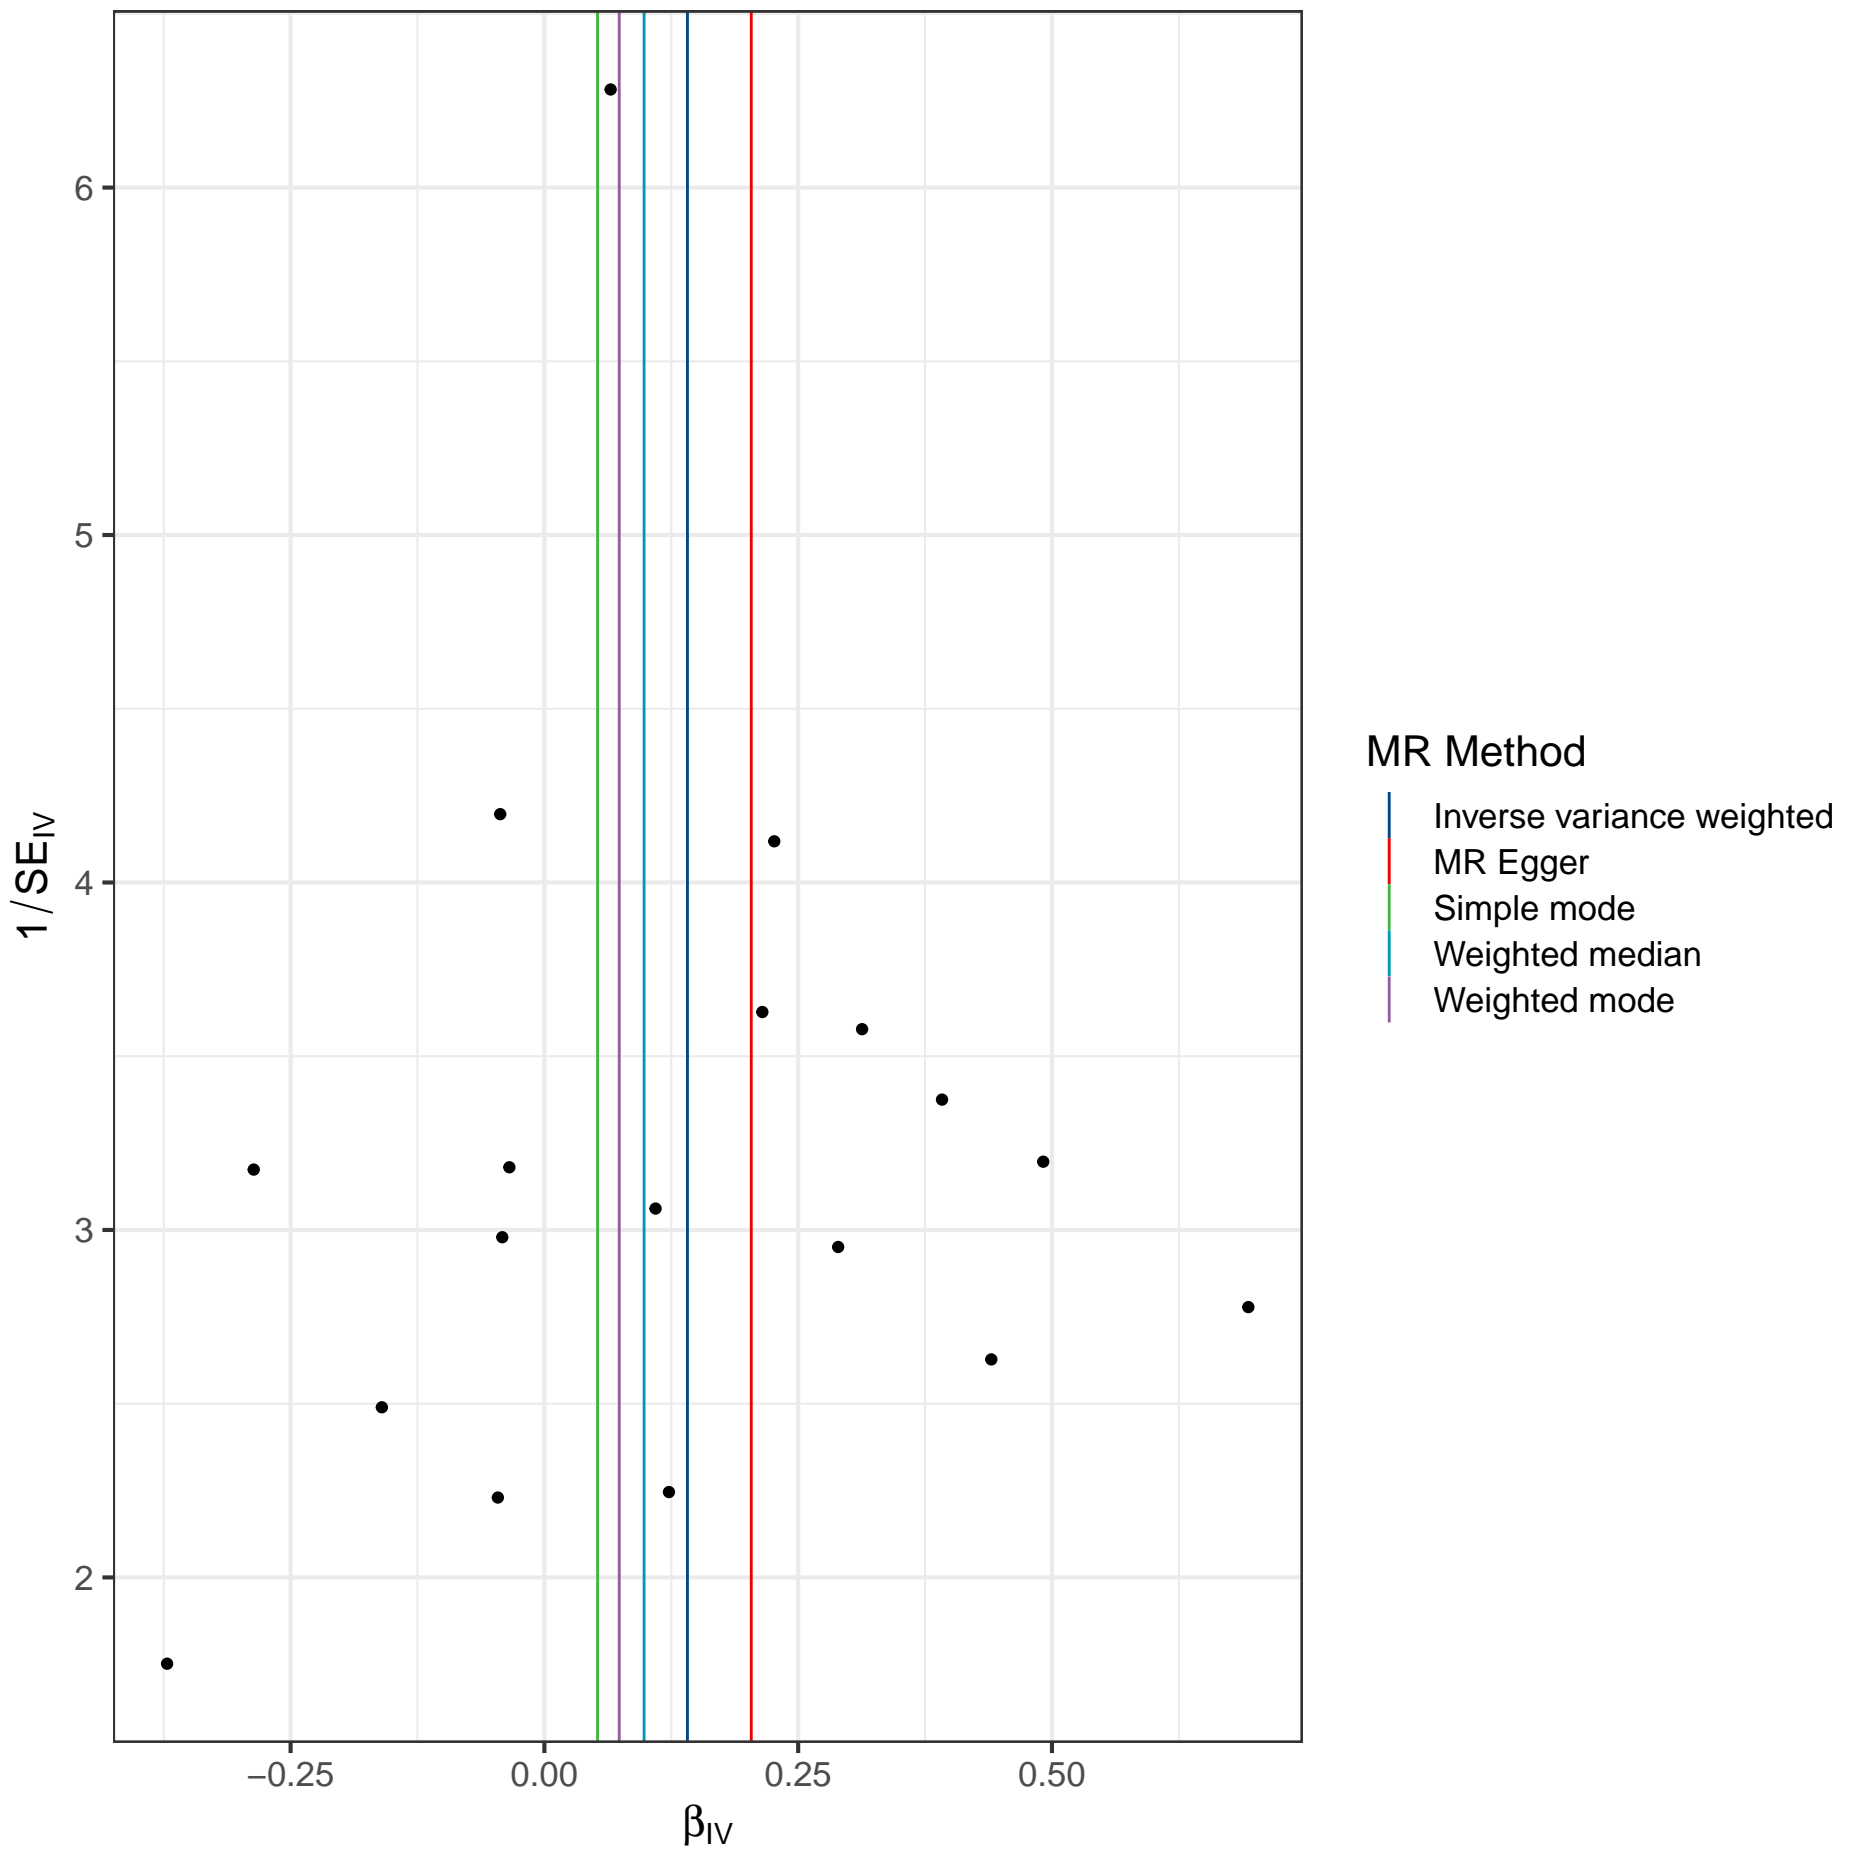

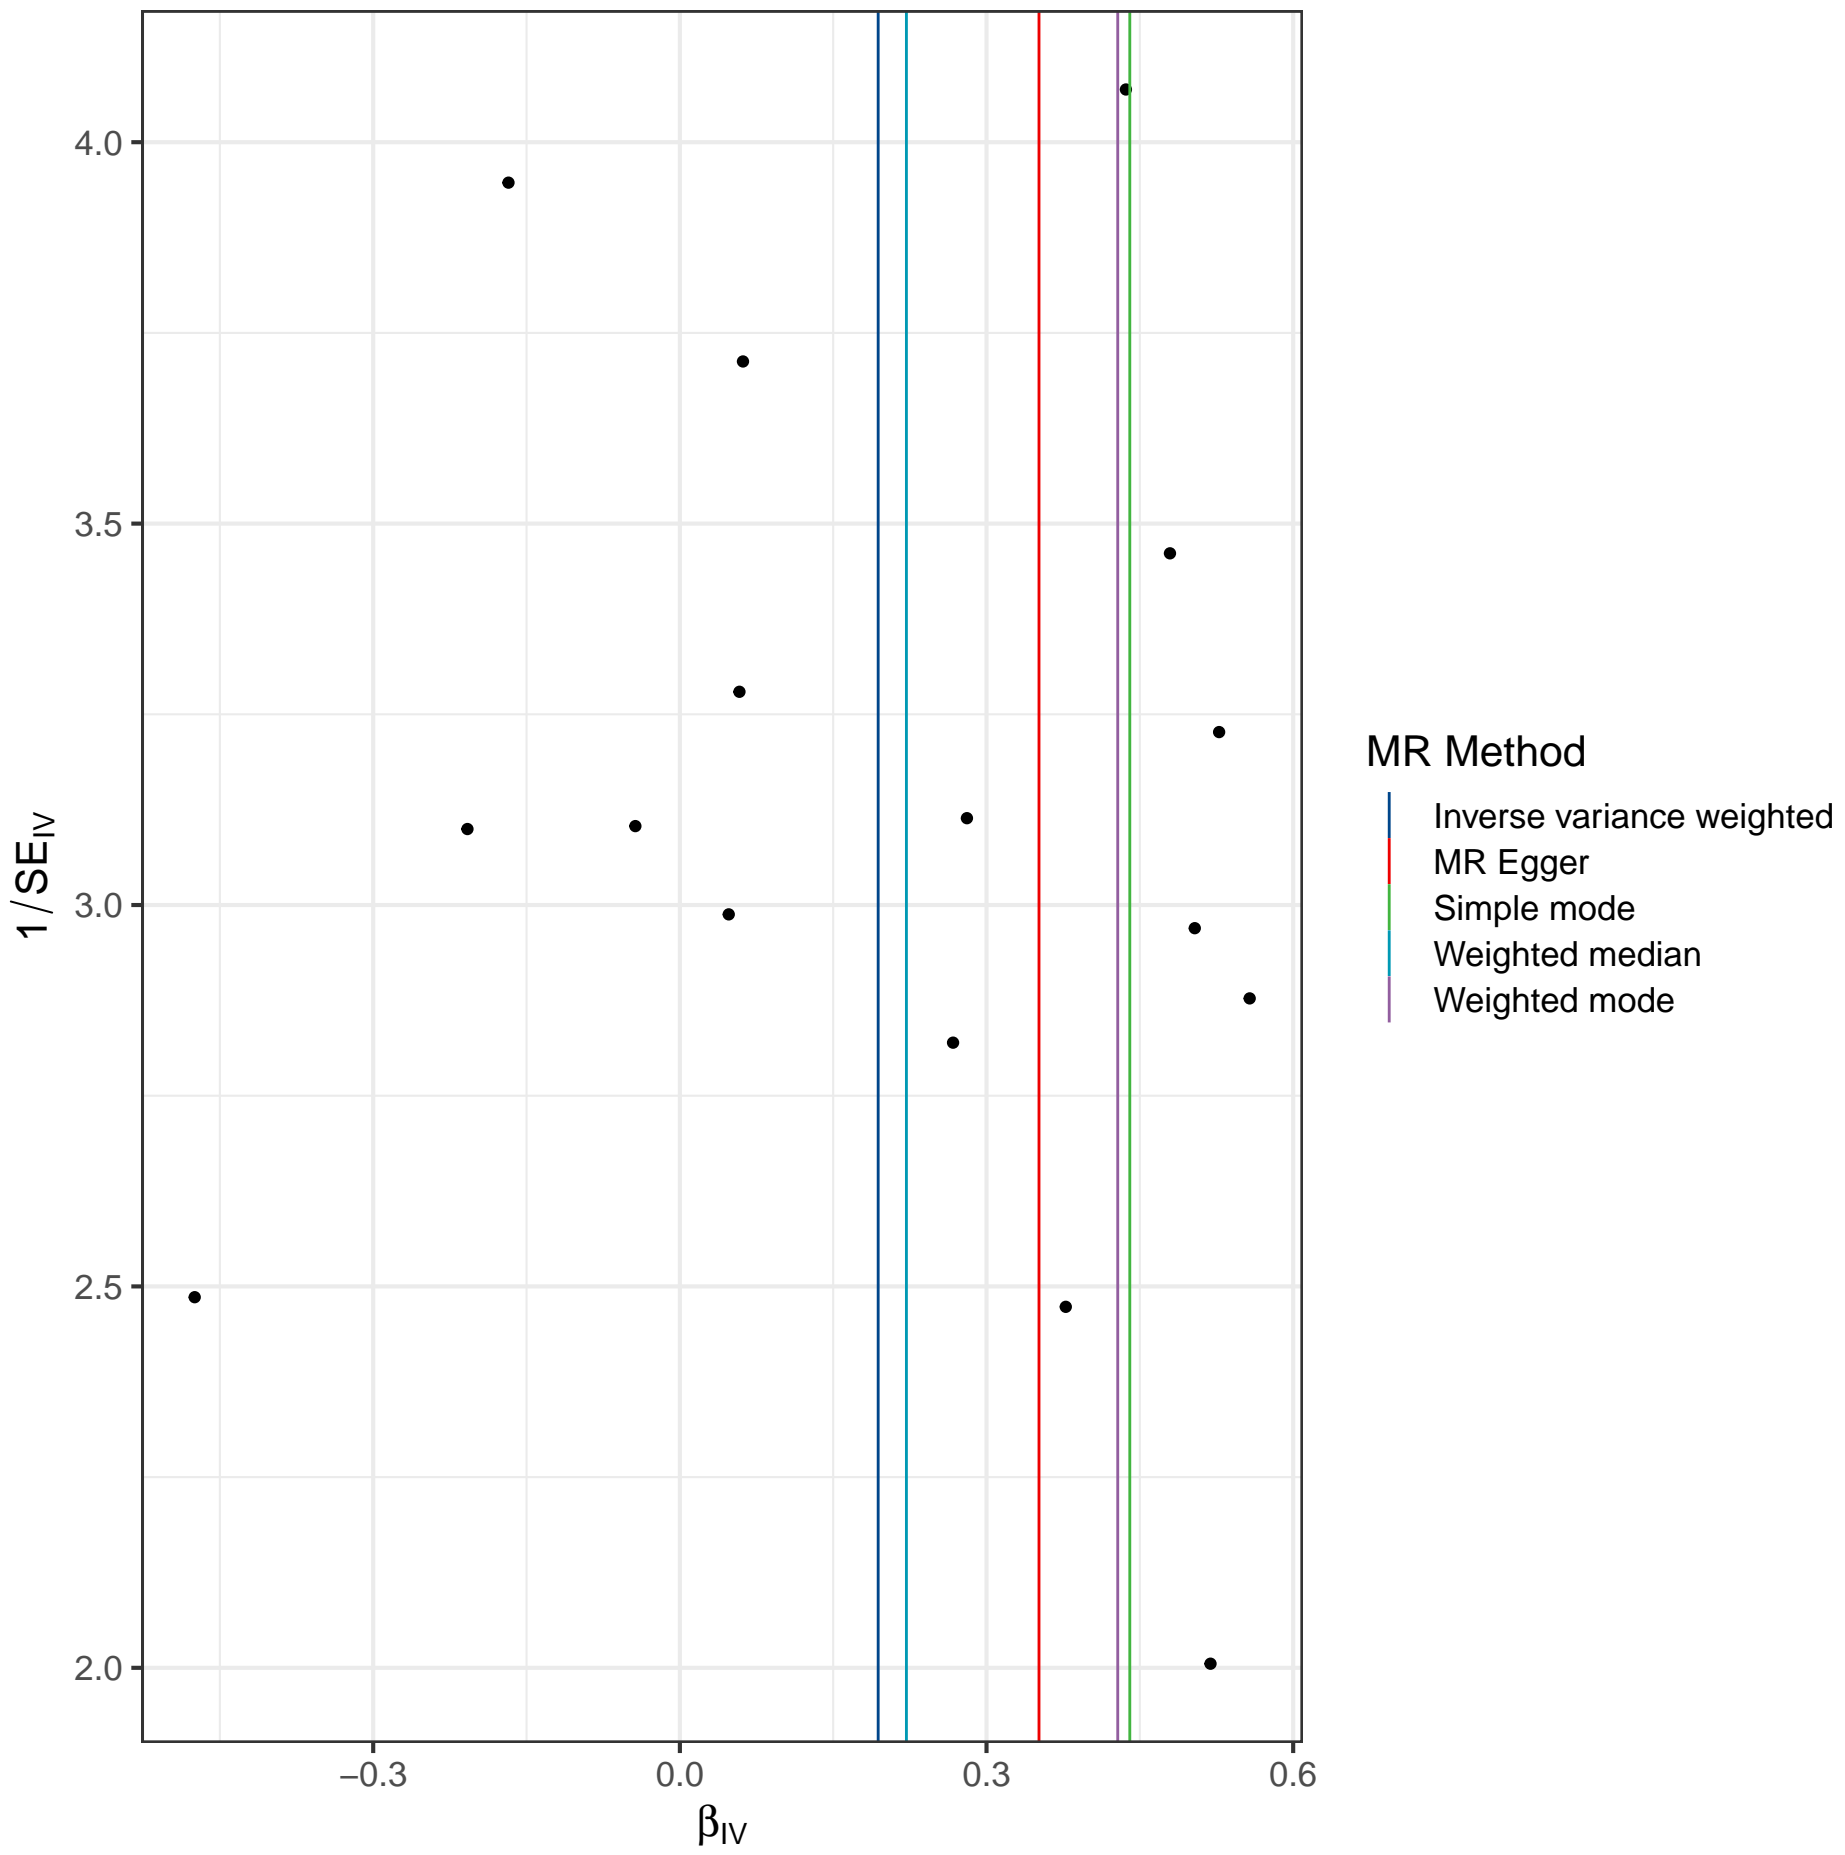

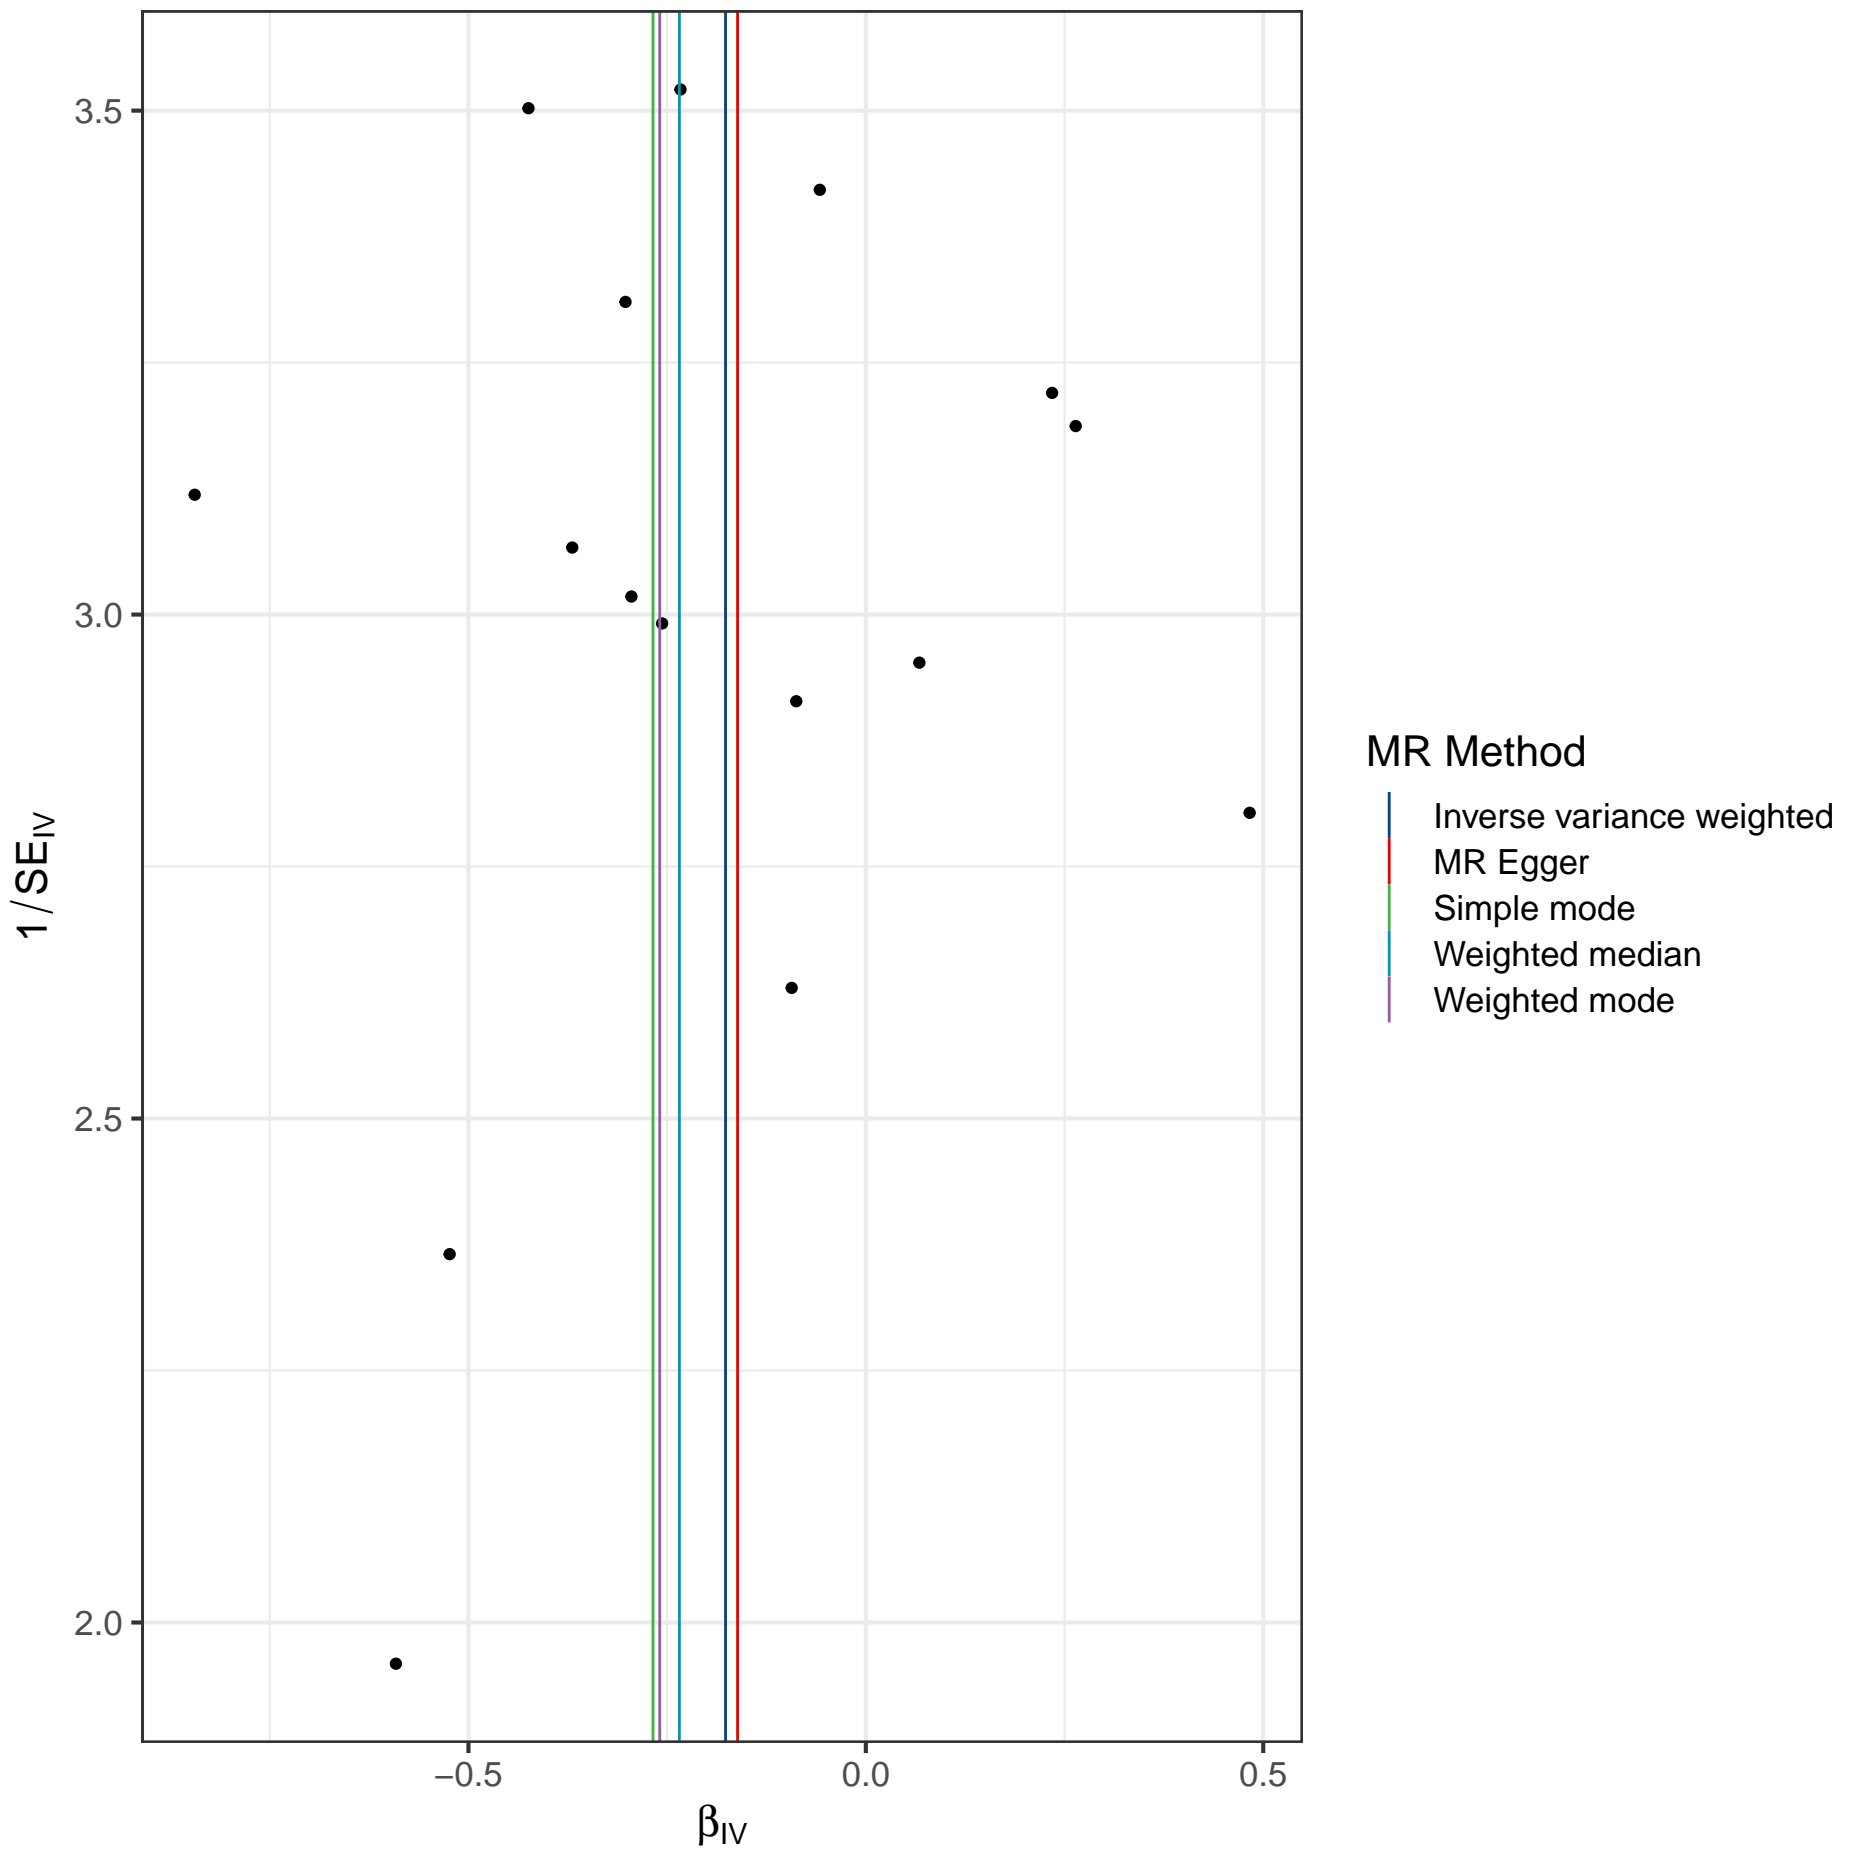

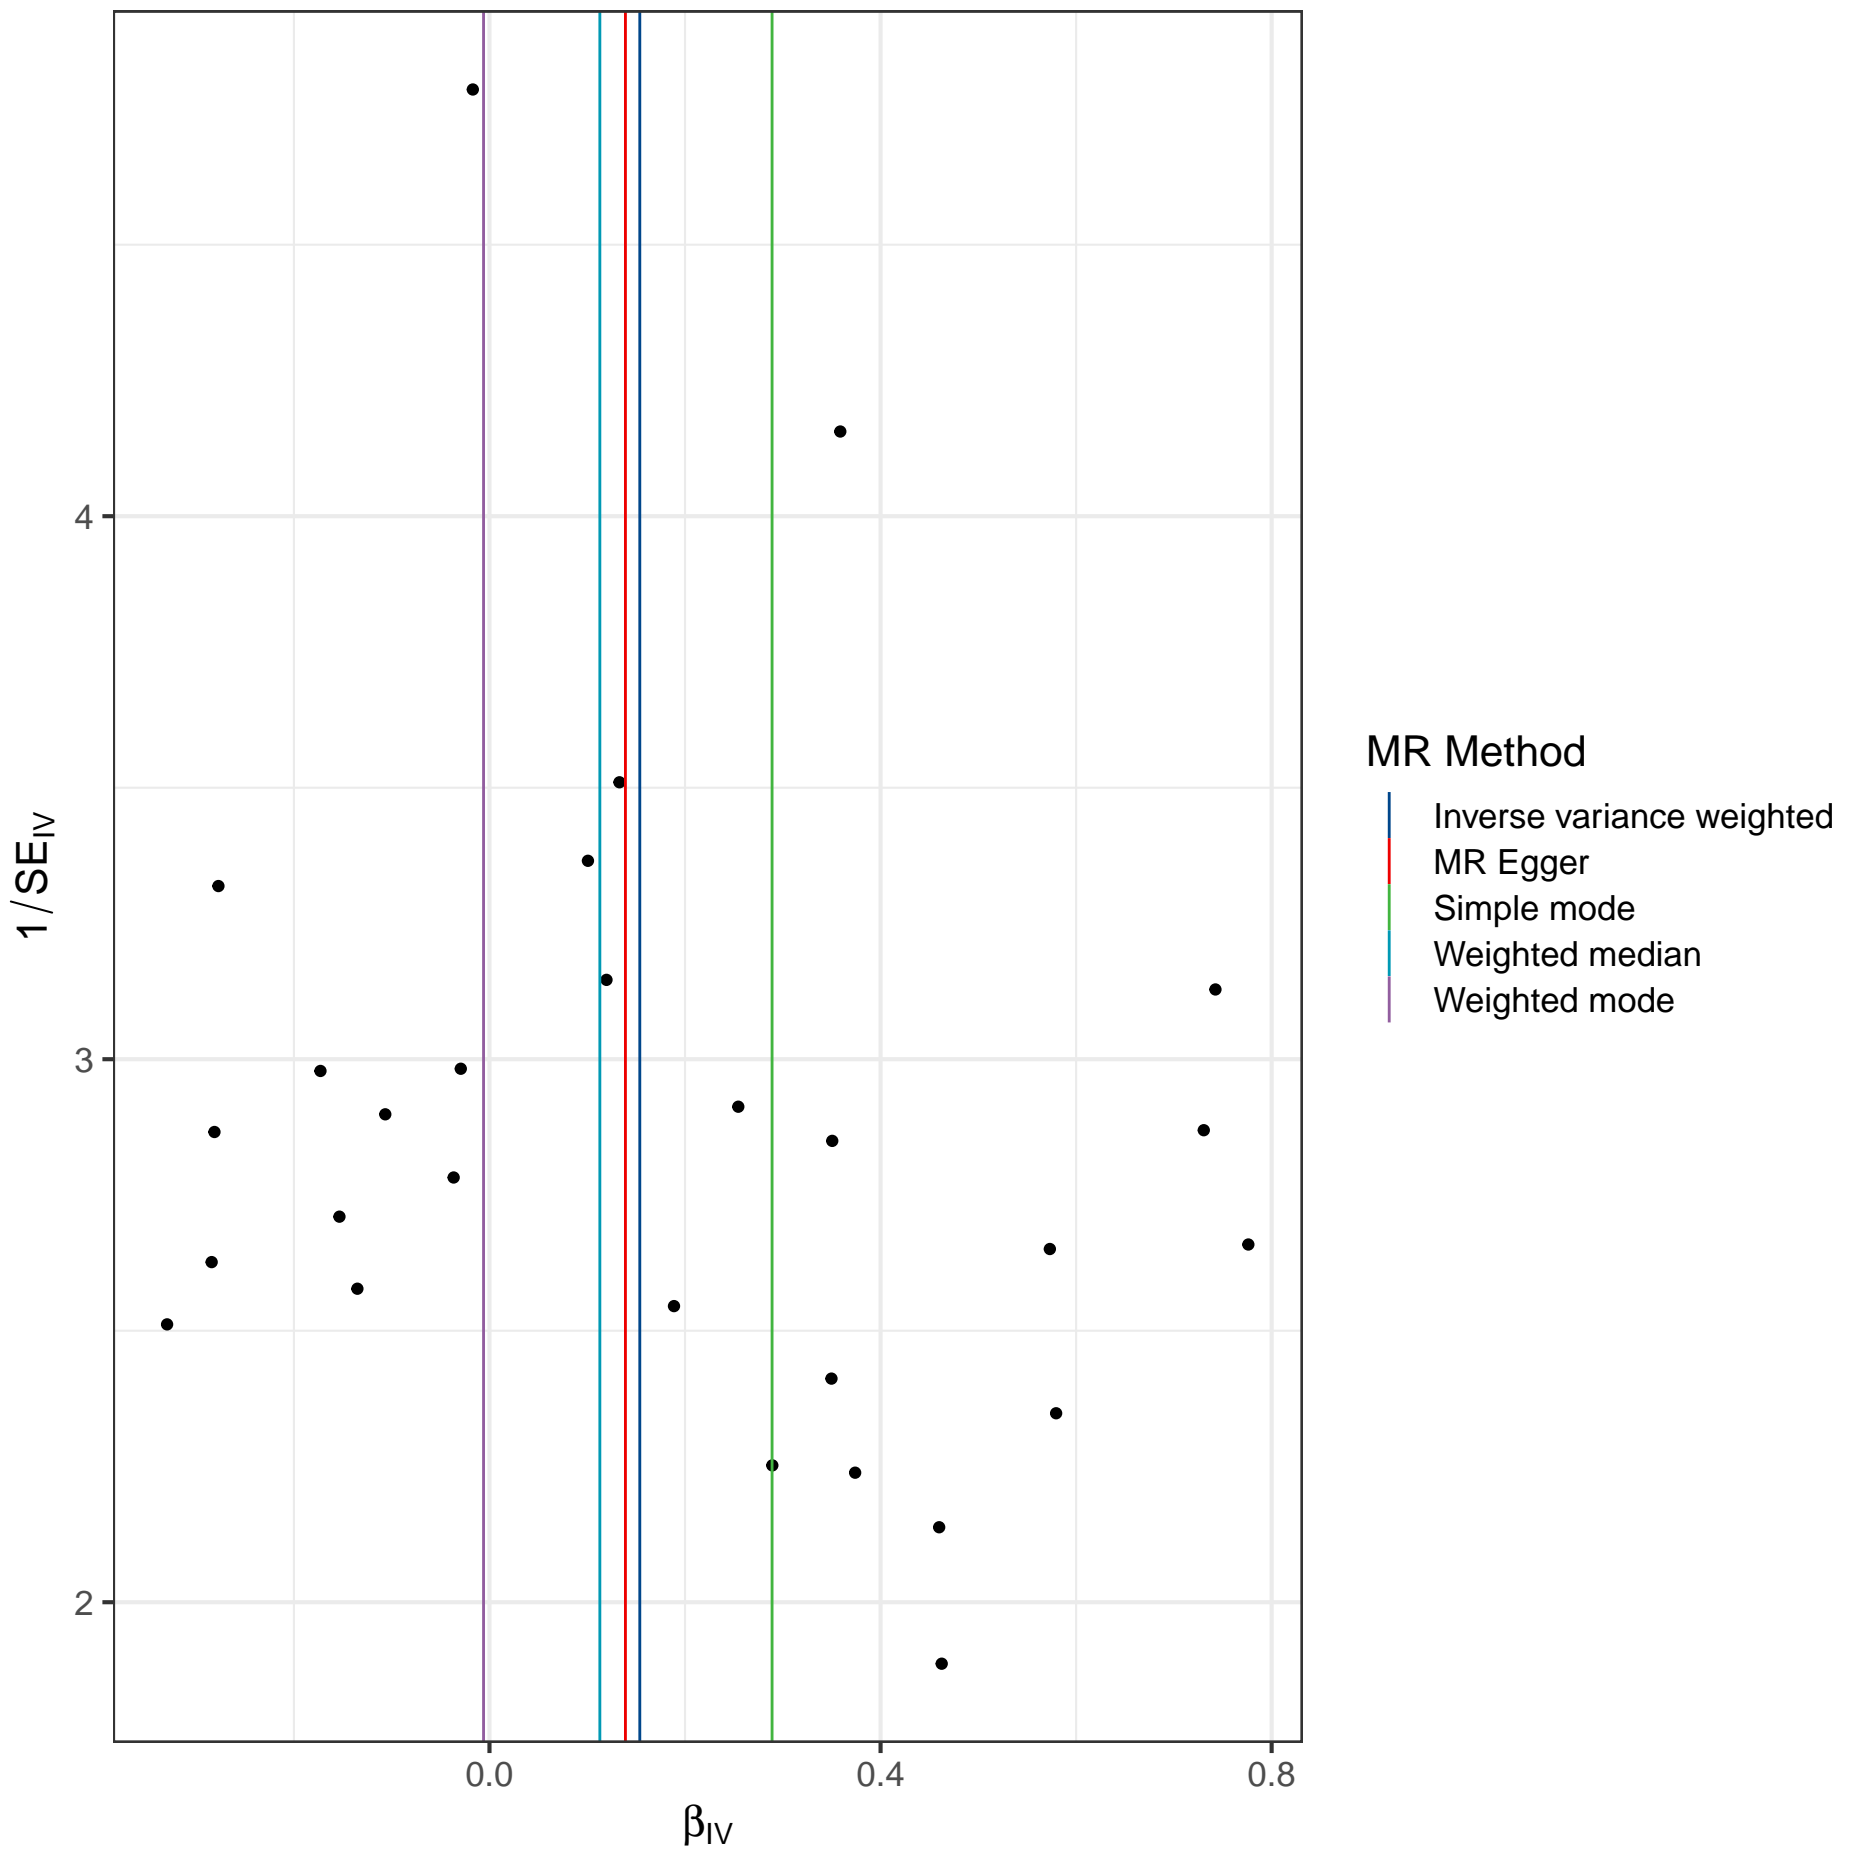

- MR Method
- Inverse variance weighted
  - MR Egger
  - Simple mode
  - Weighted median
  - Weighted mode

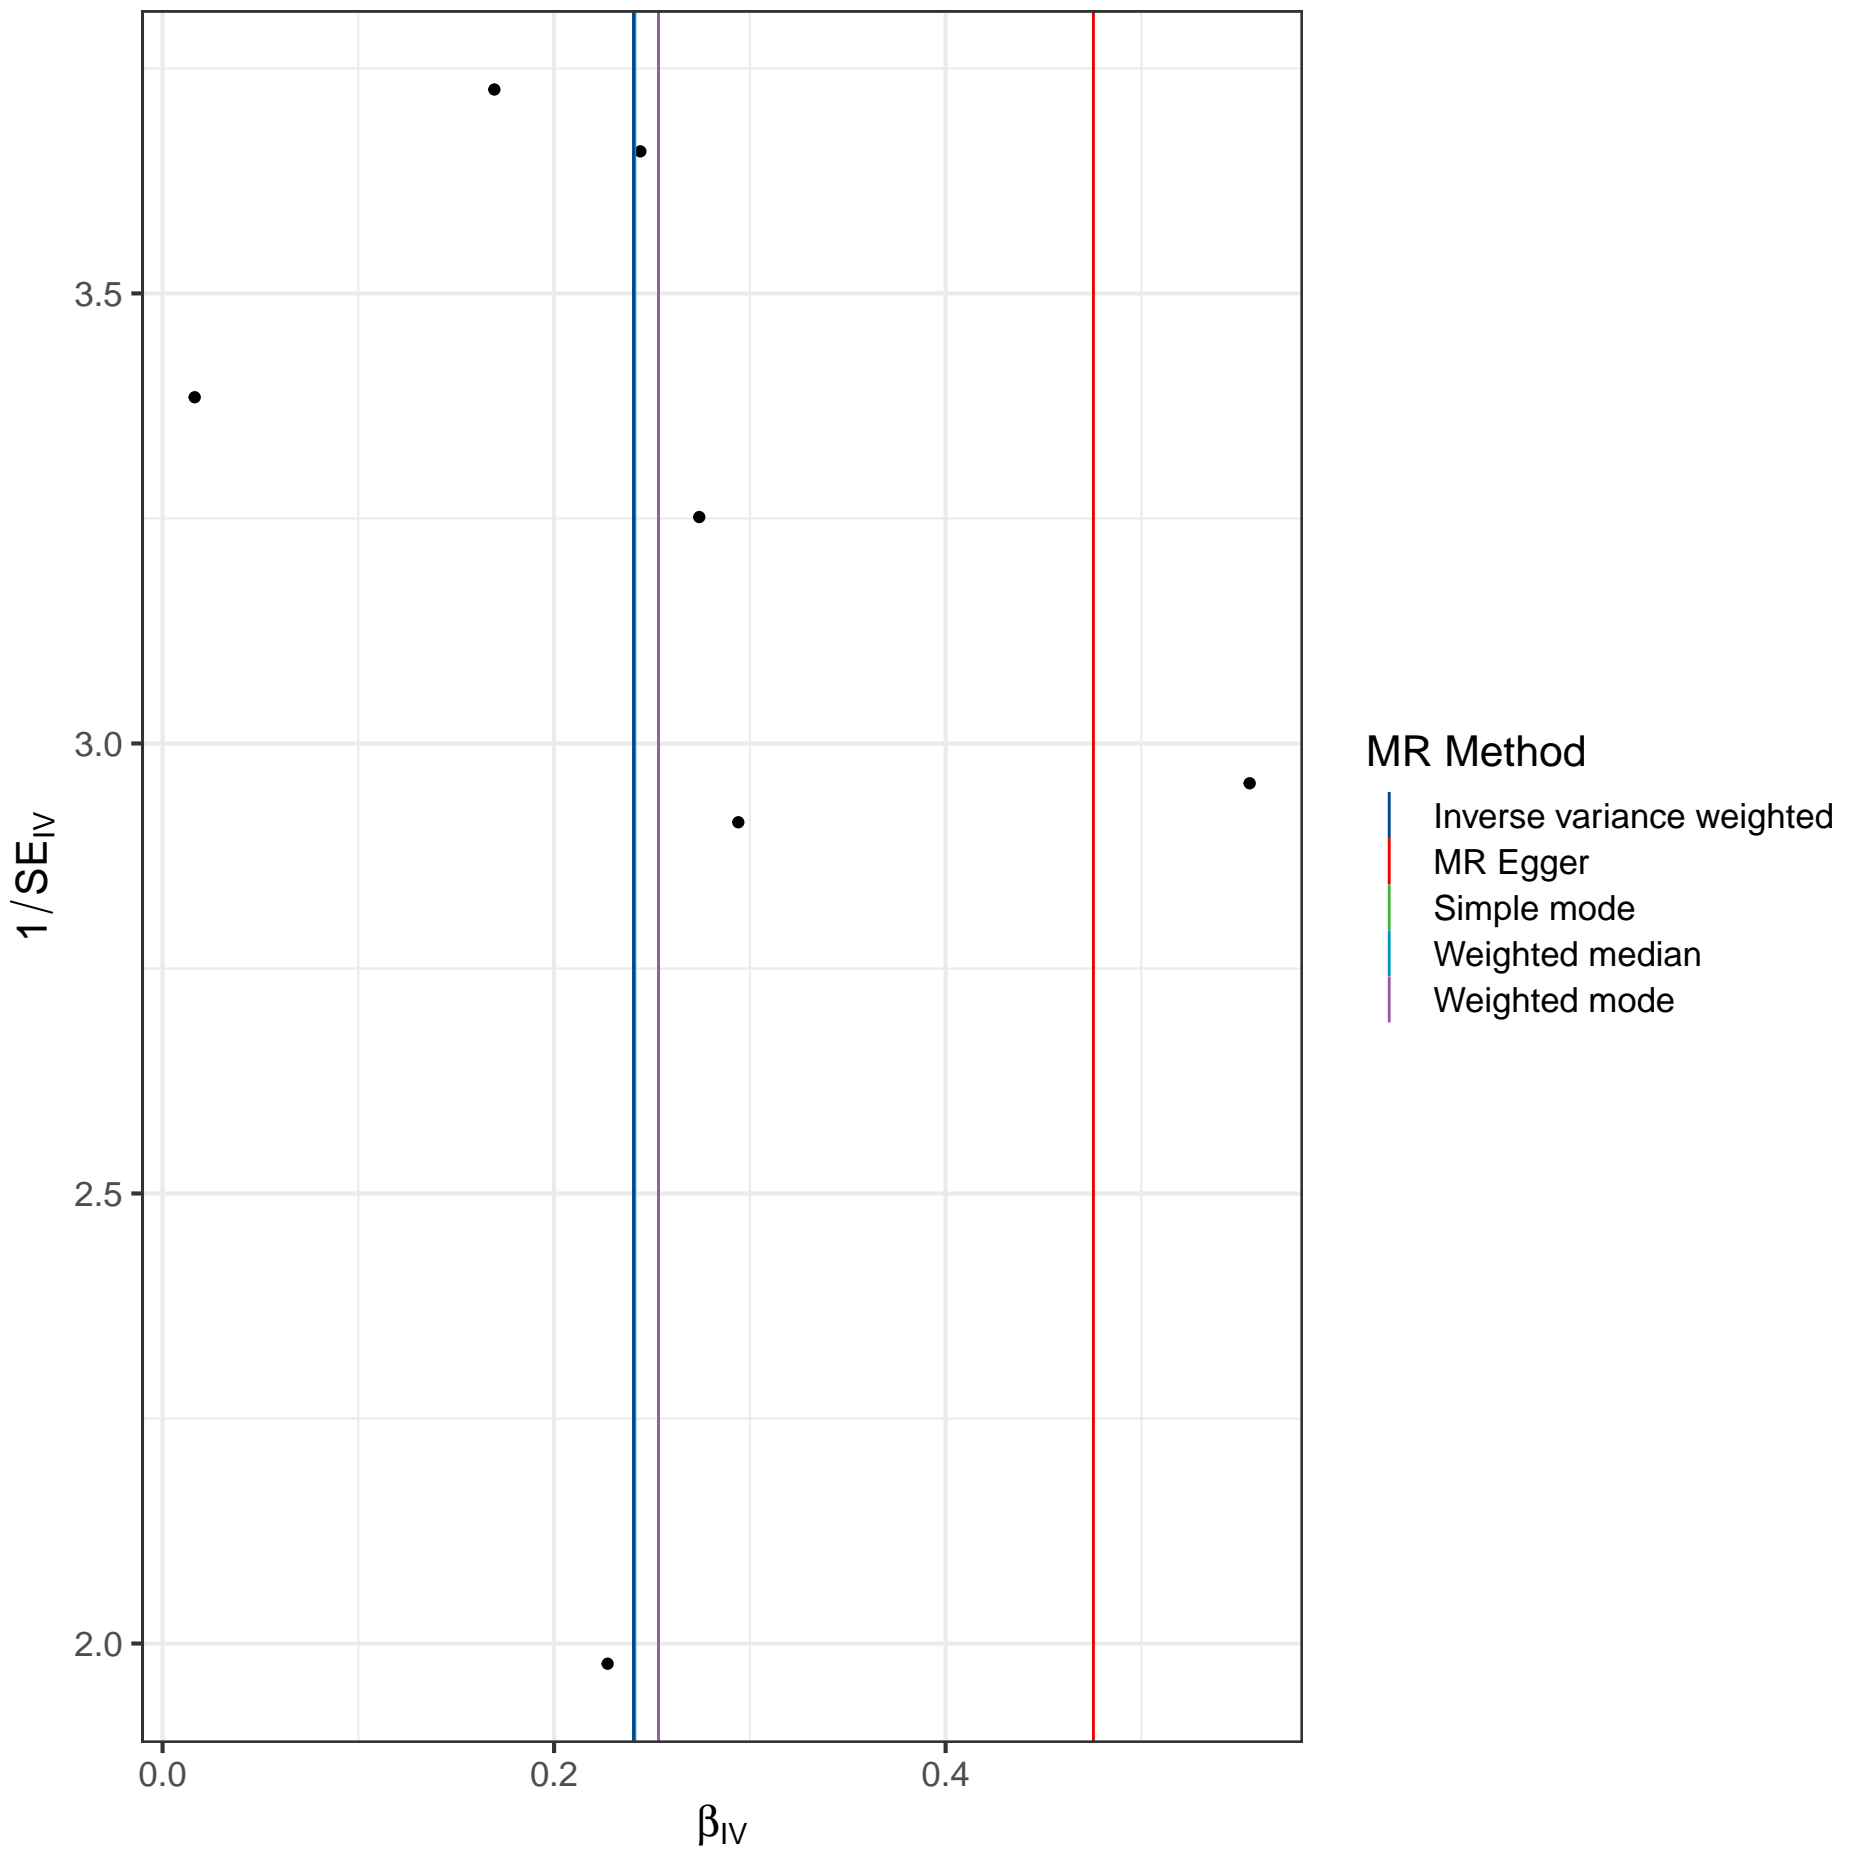



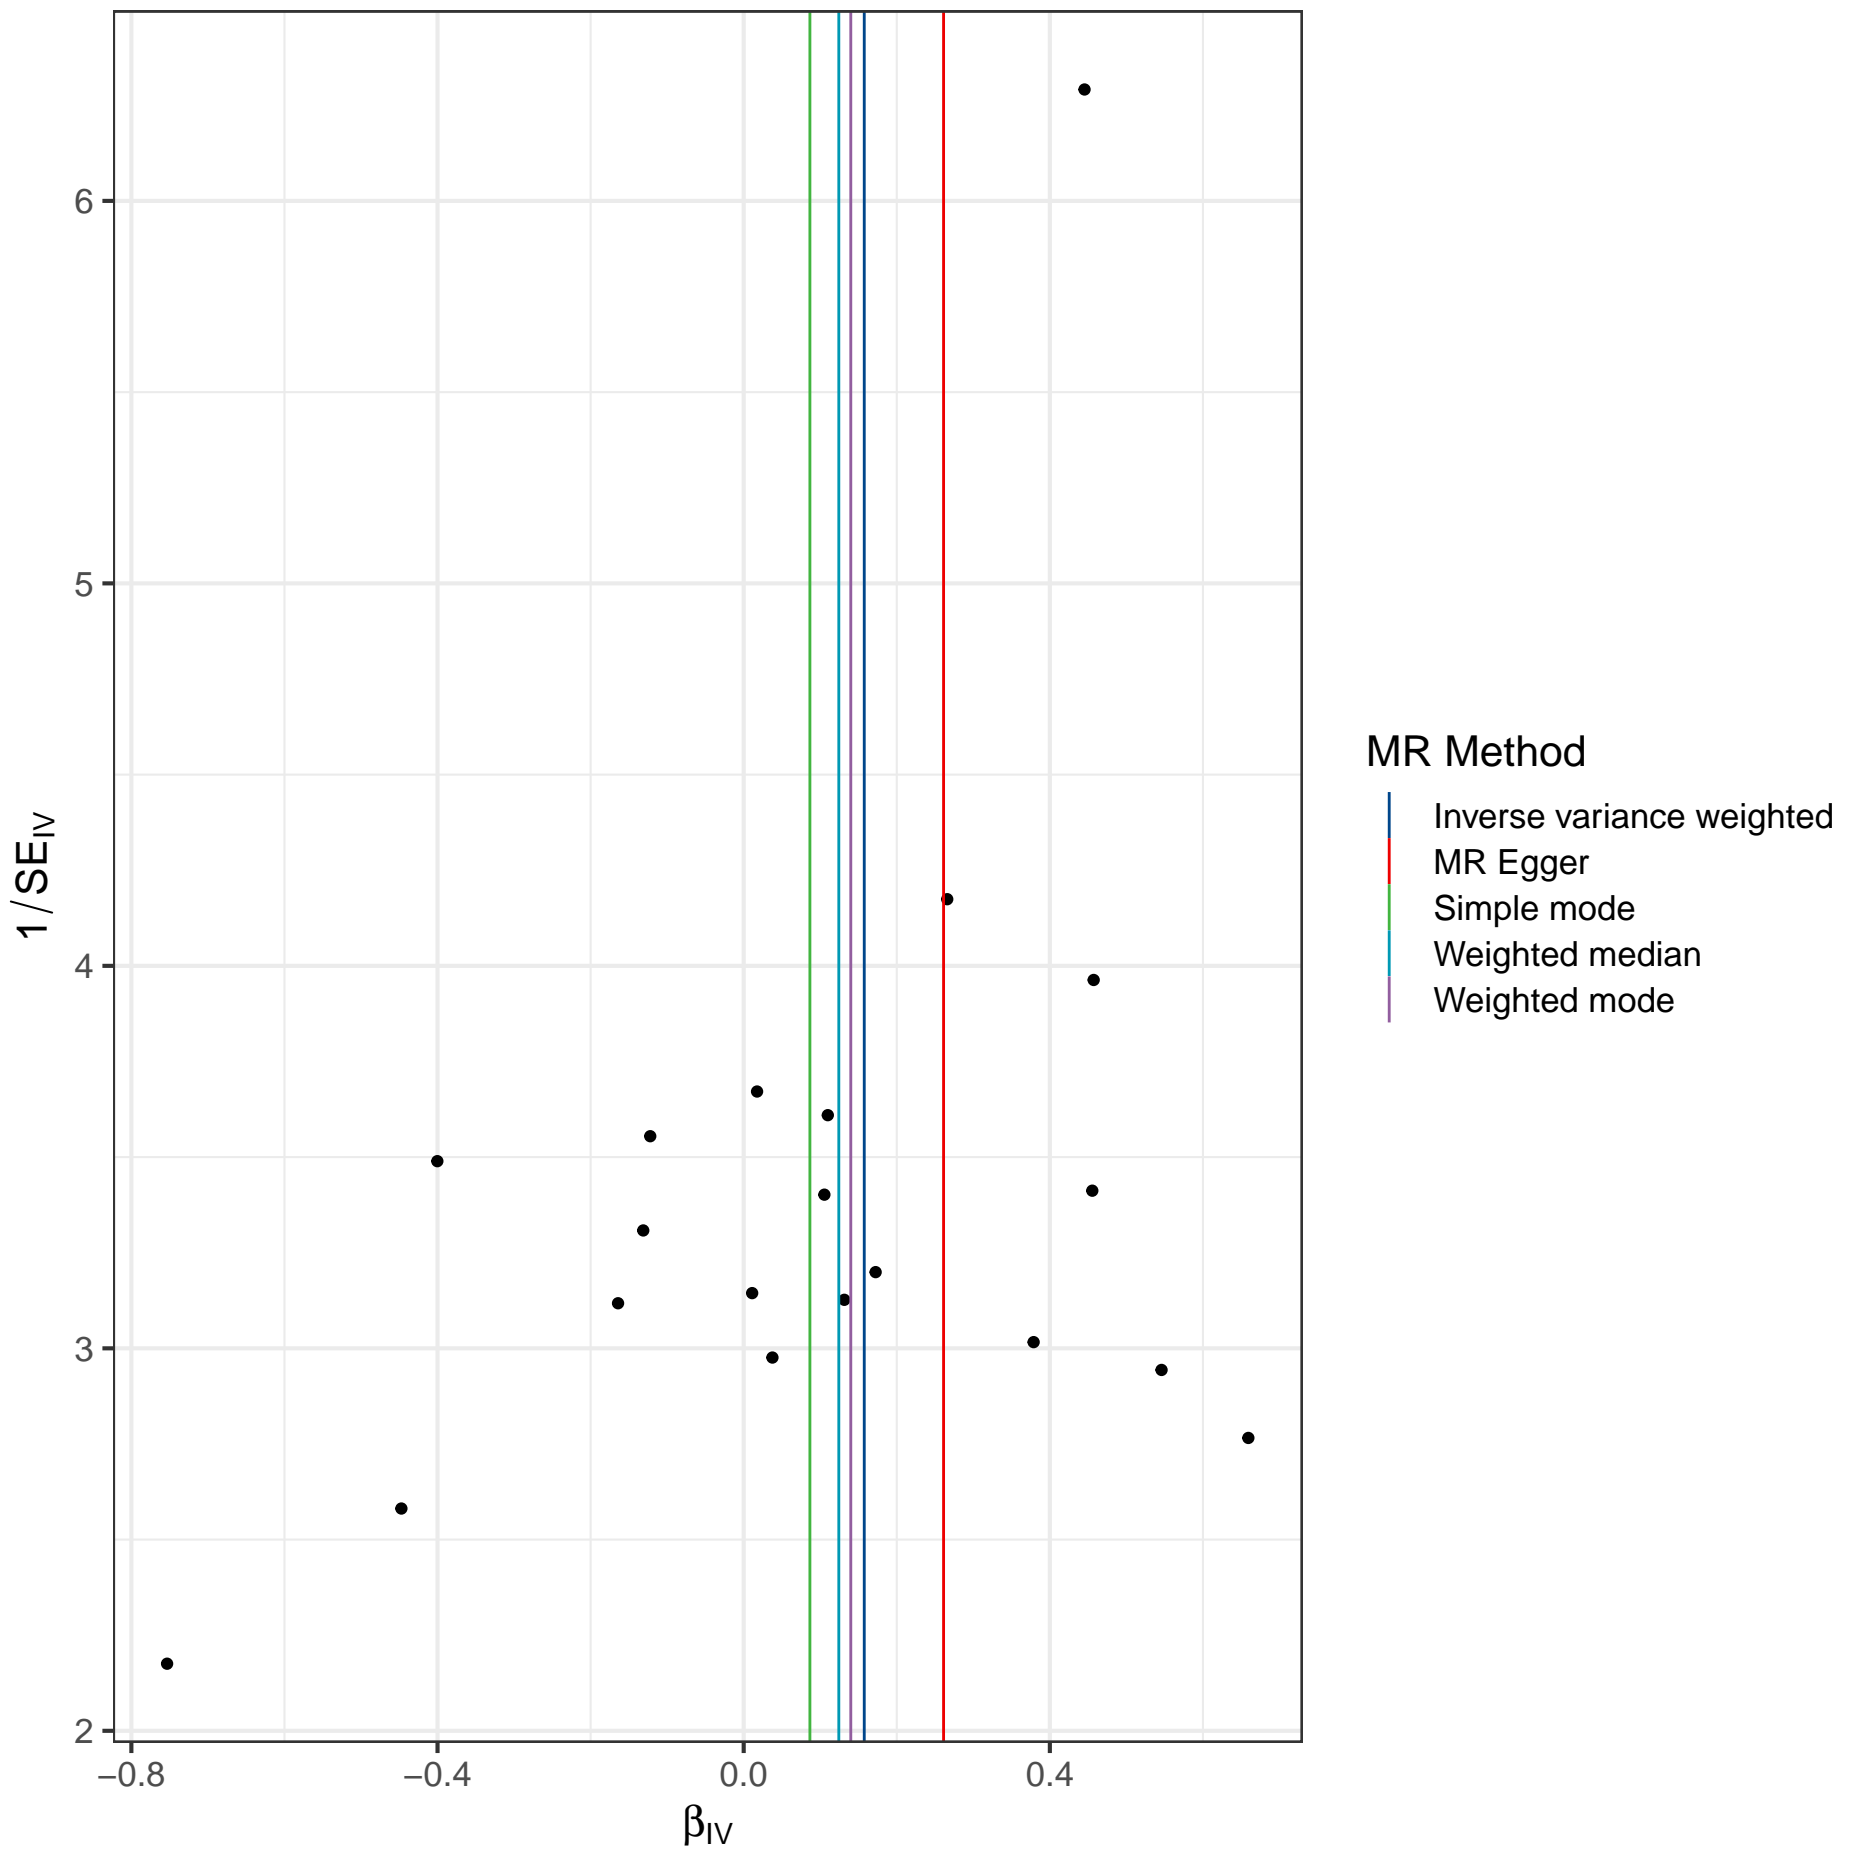

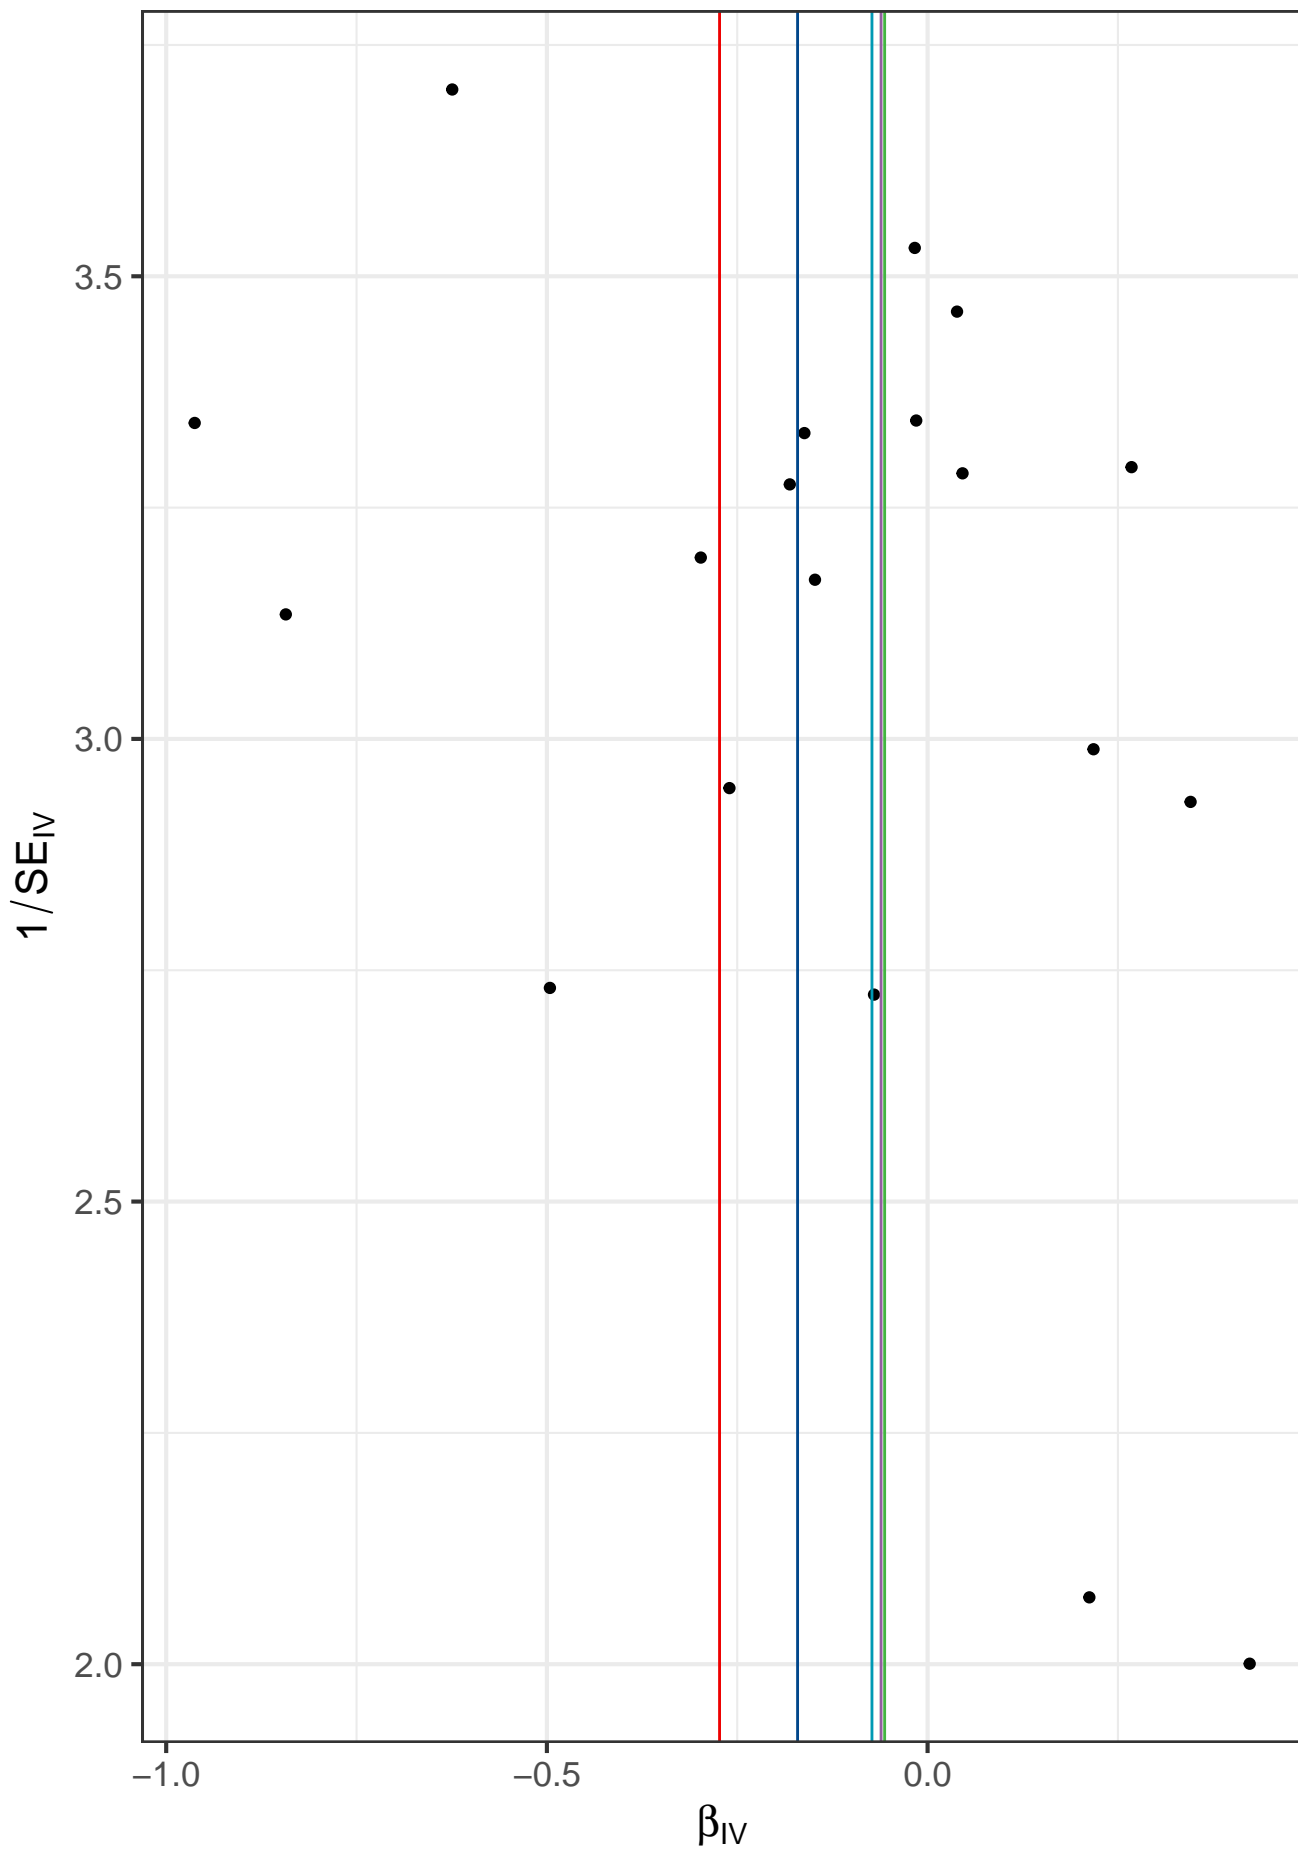

- MR Method
- Inverse variance weighted
  - MR Egger
  - Simple mode
  - Weighted median
  - Weighted mode

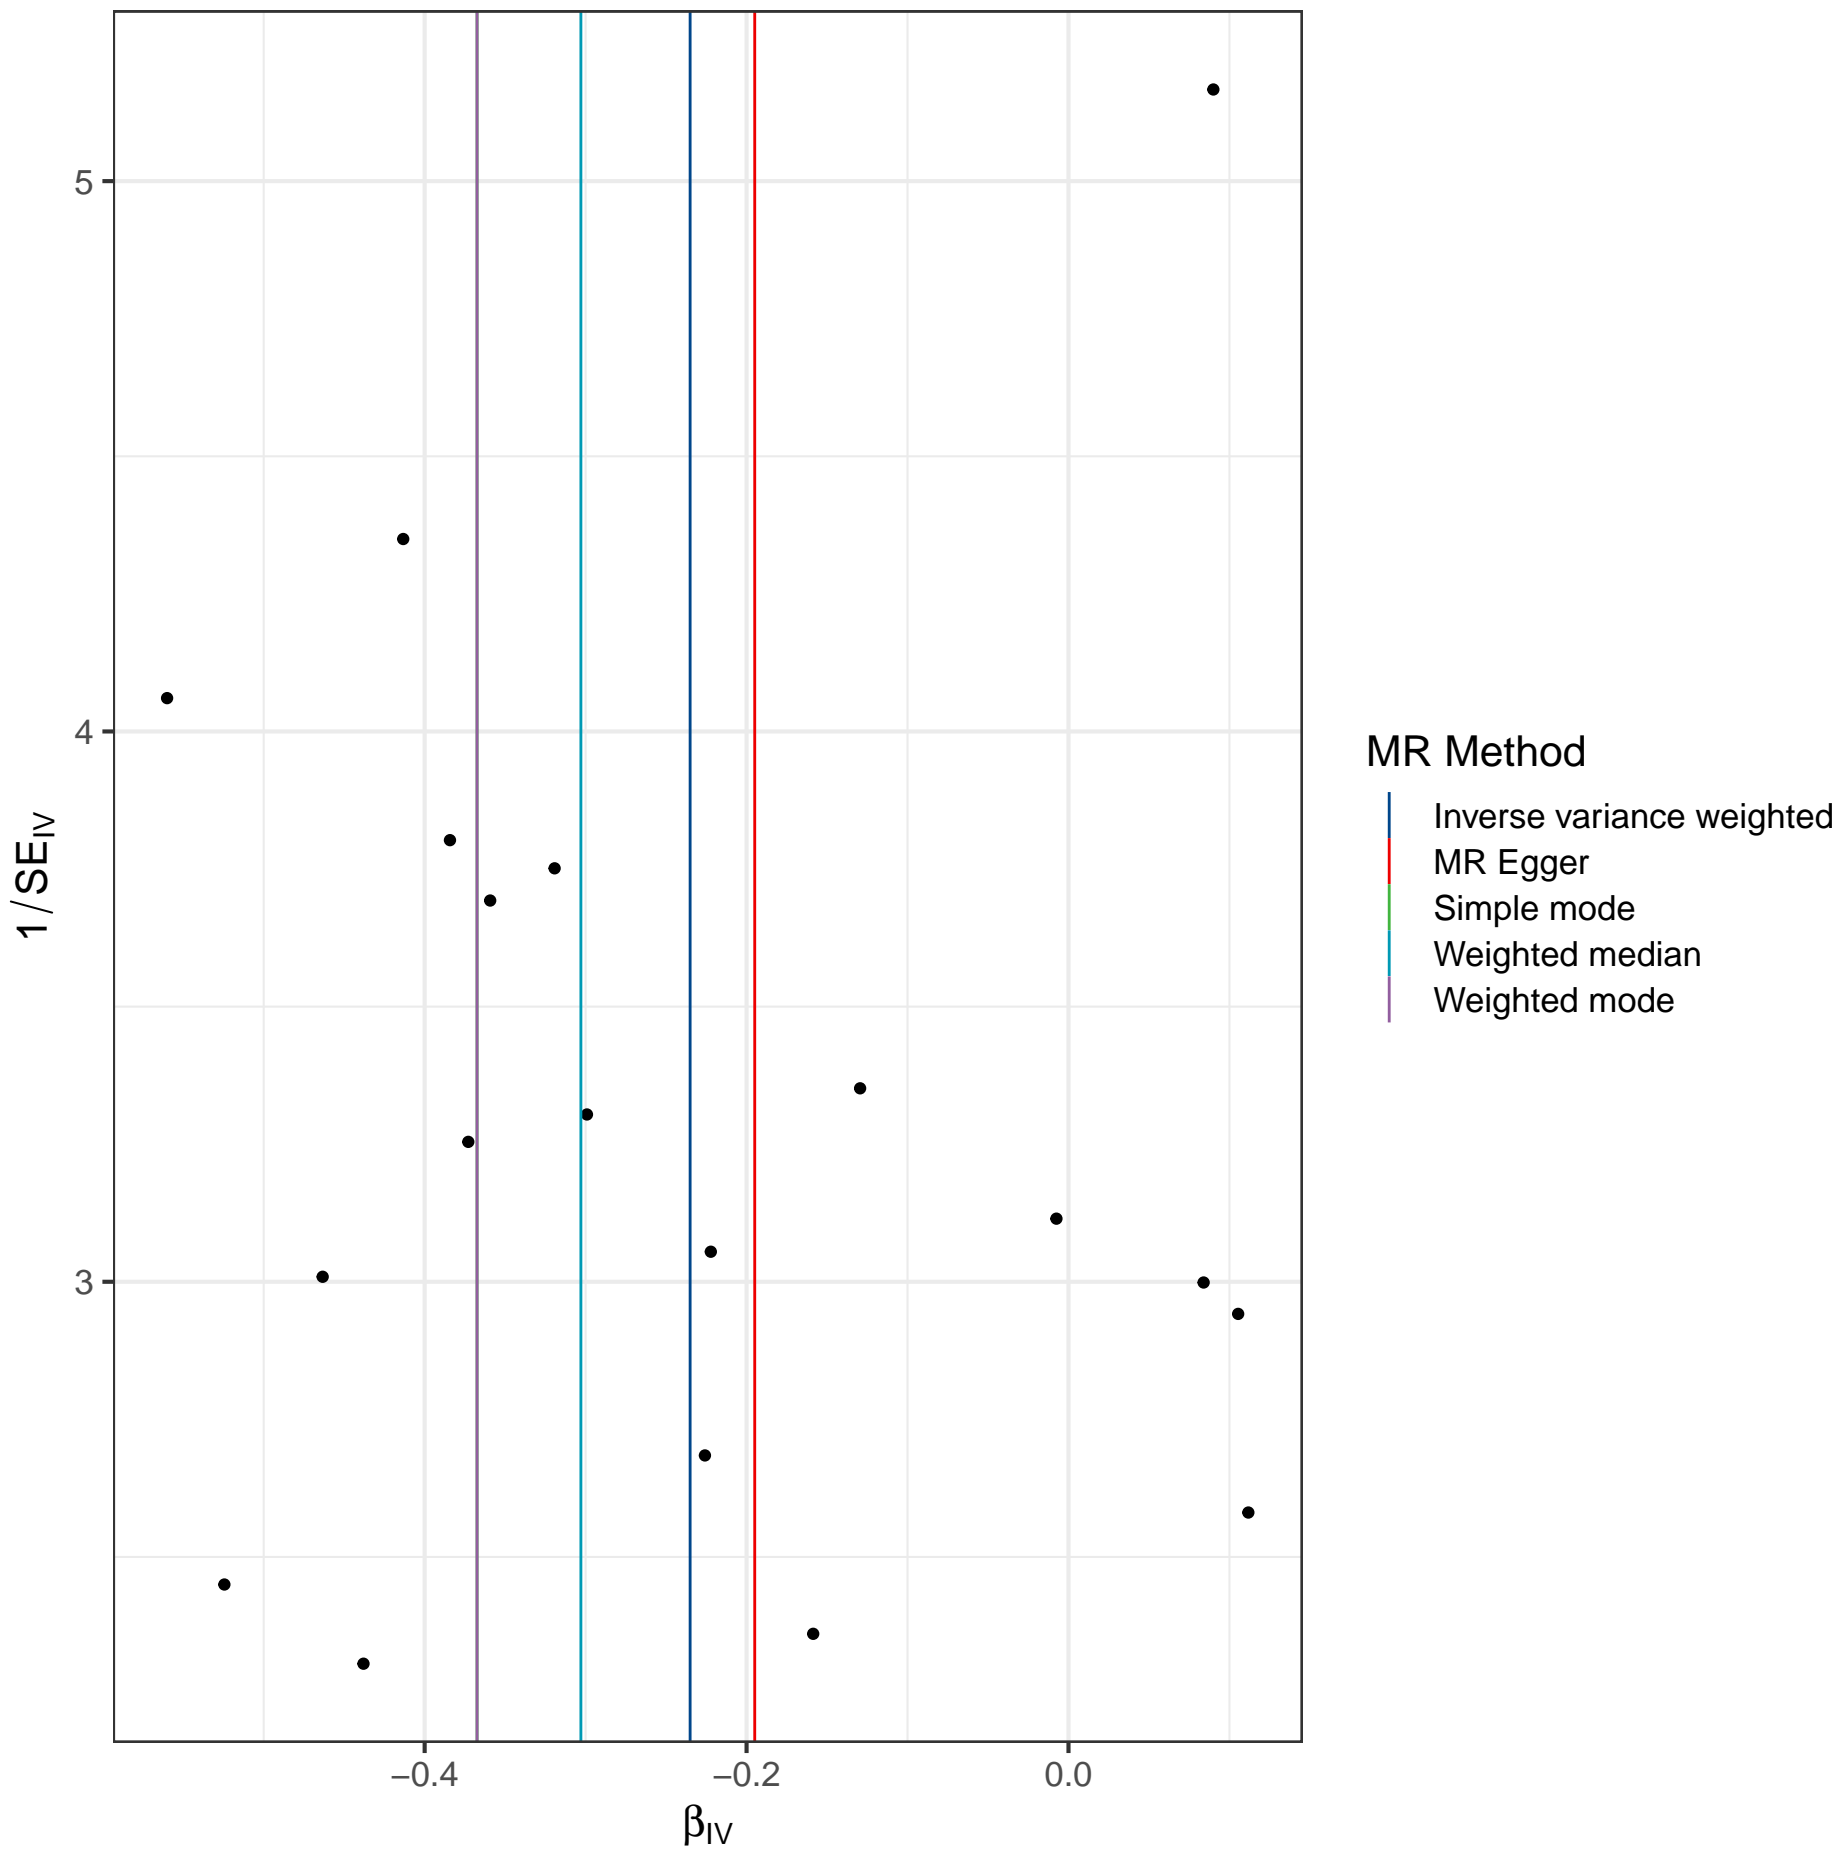

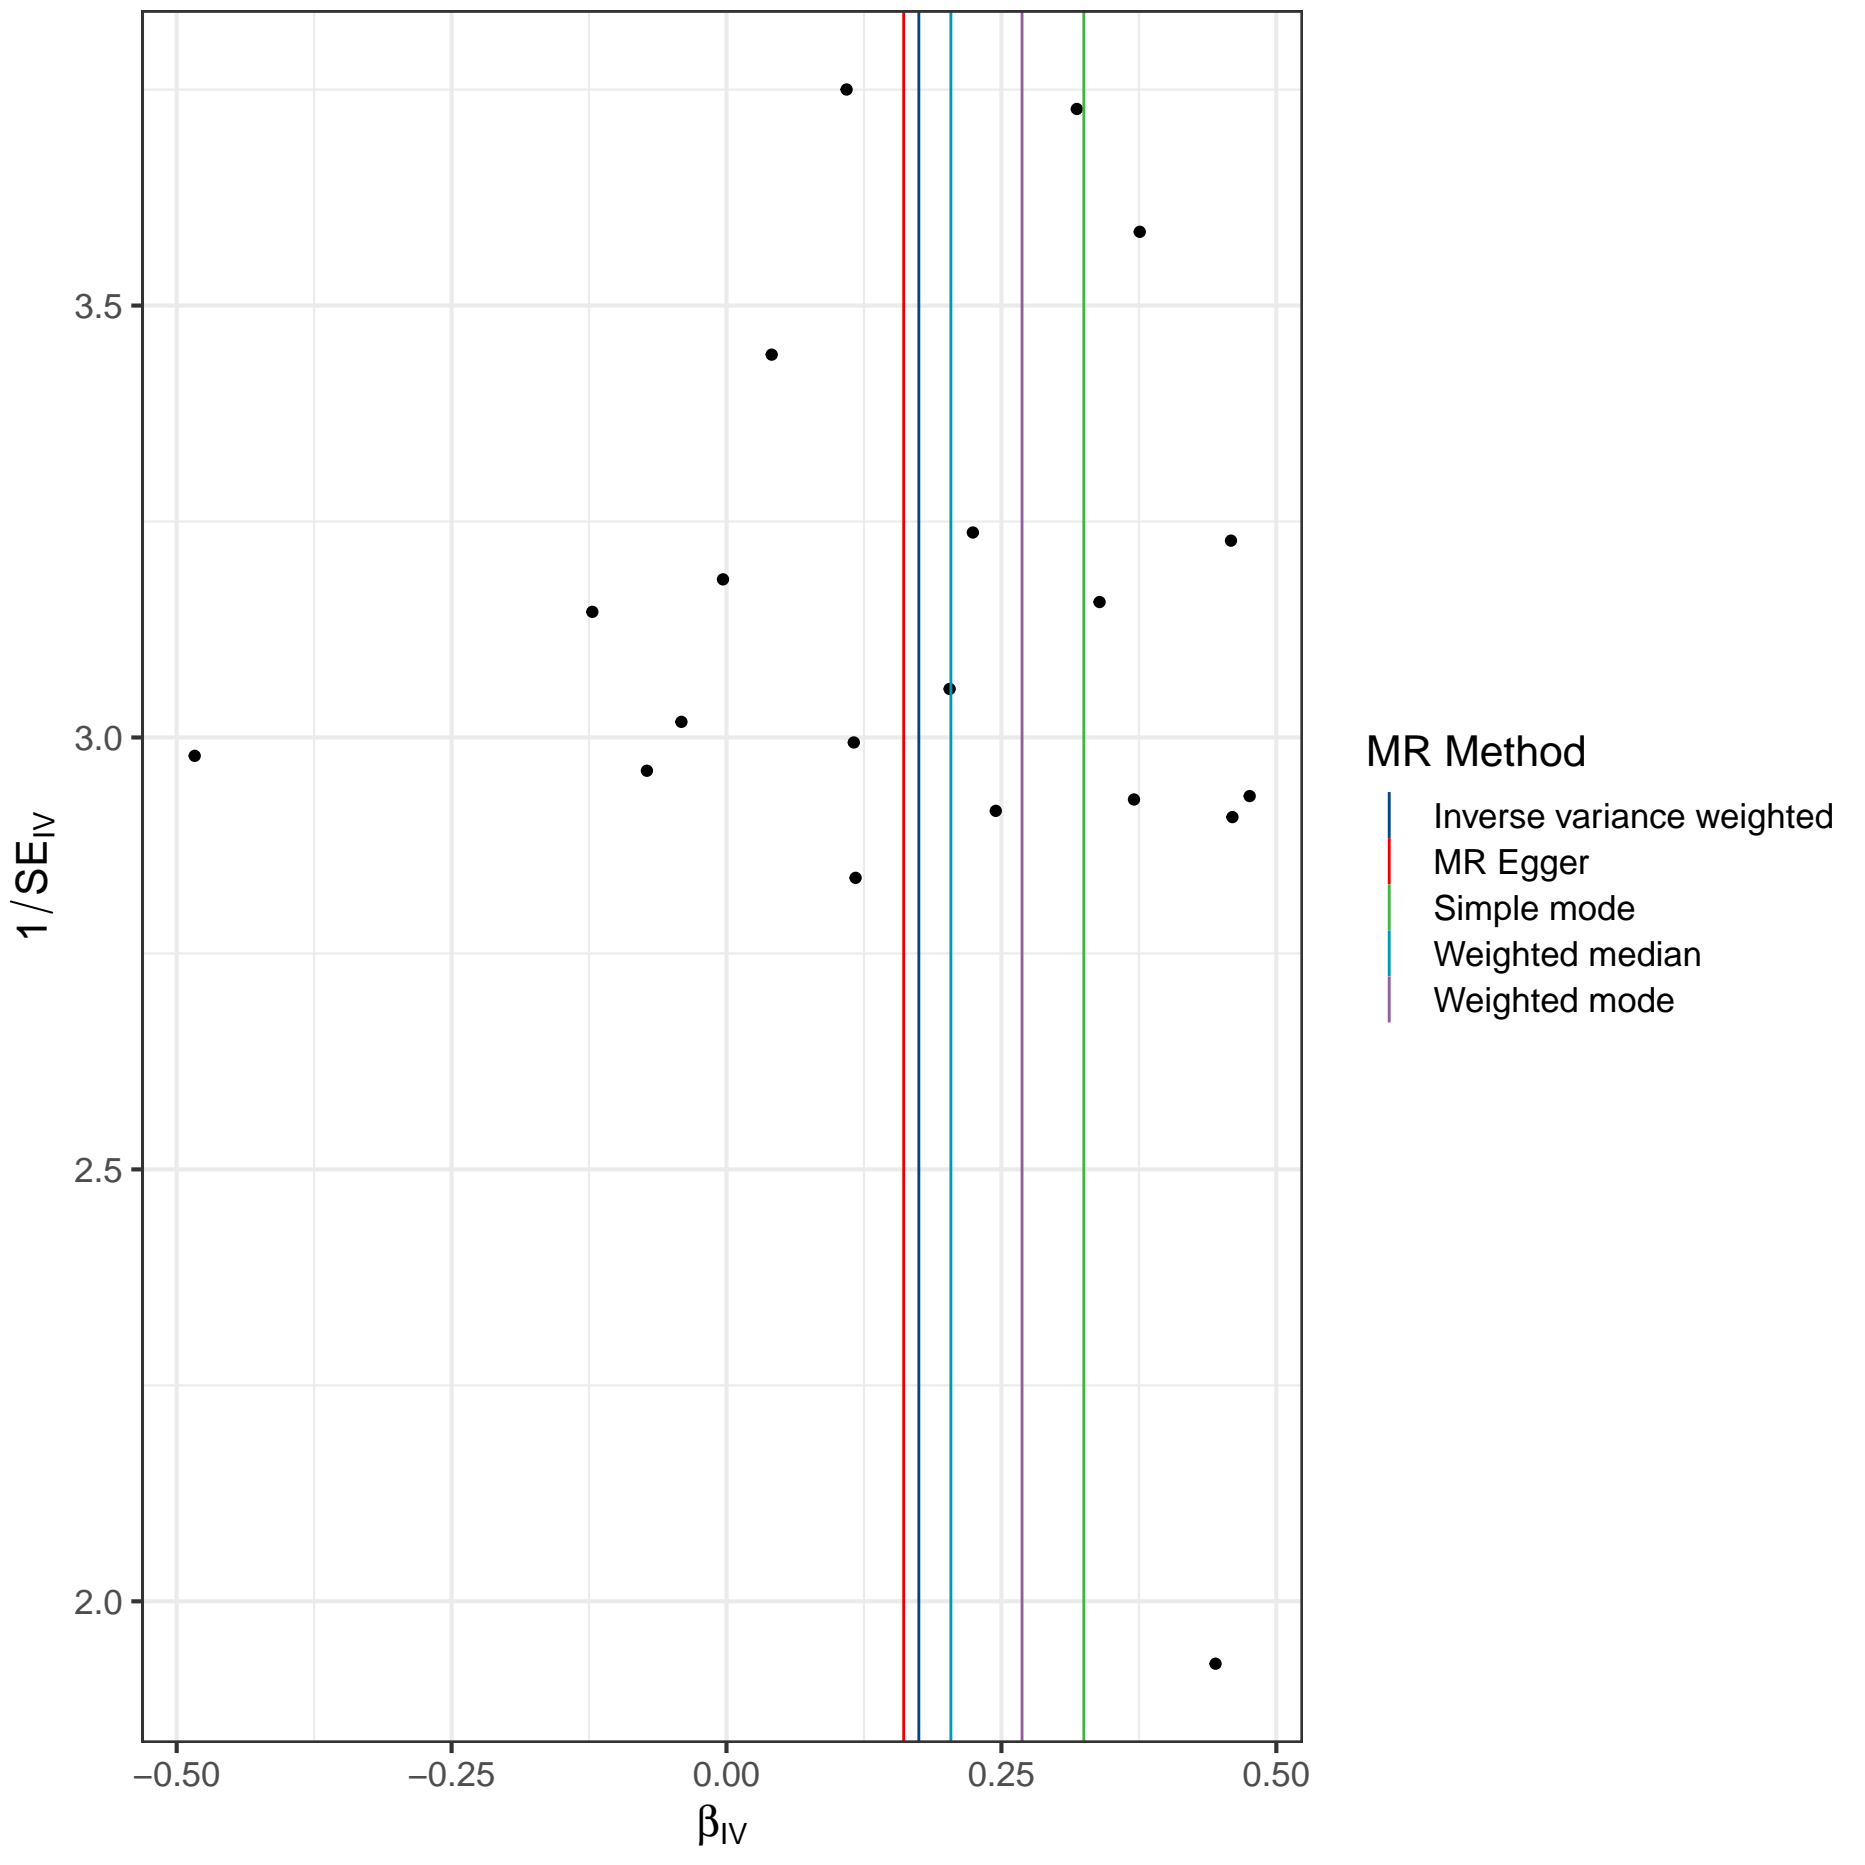

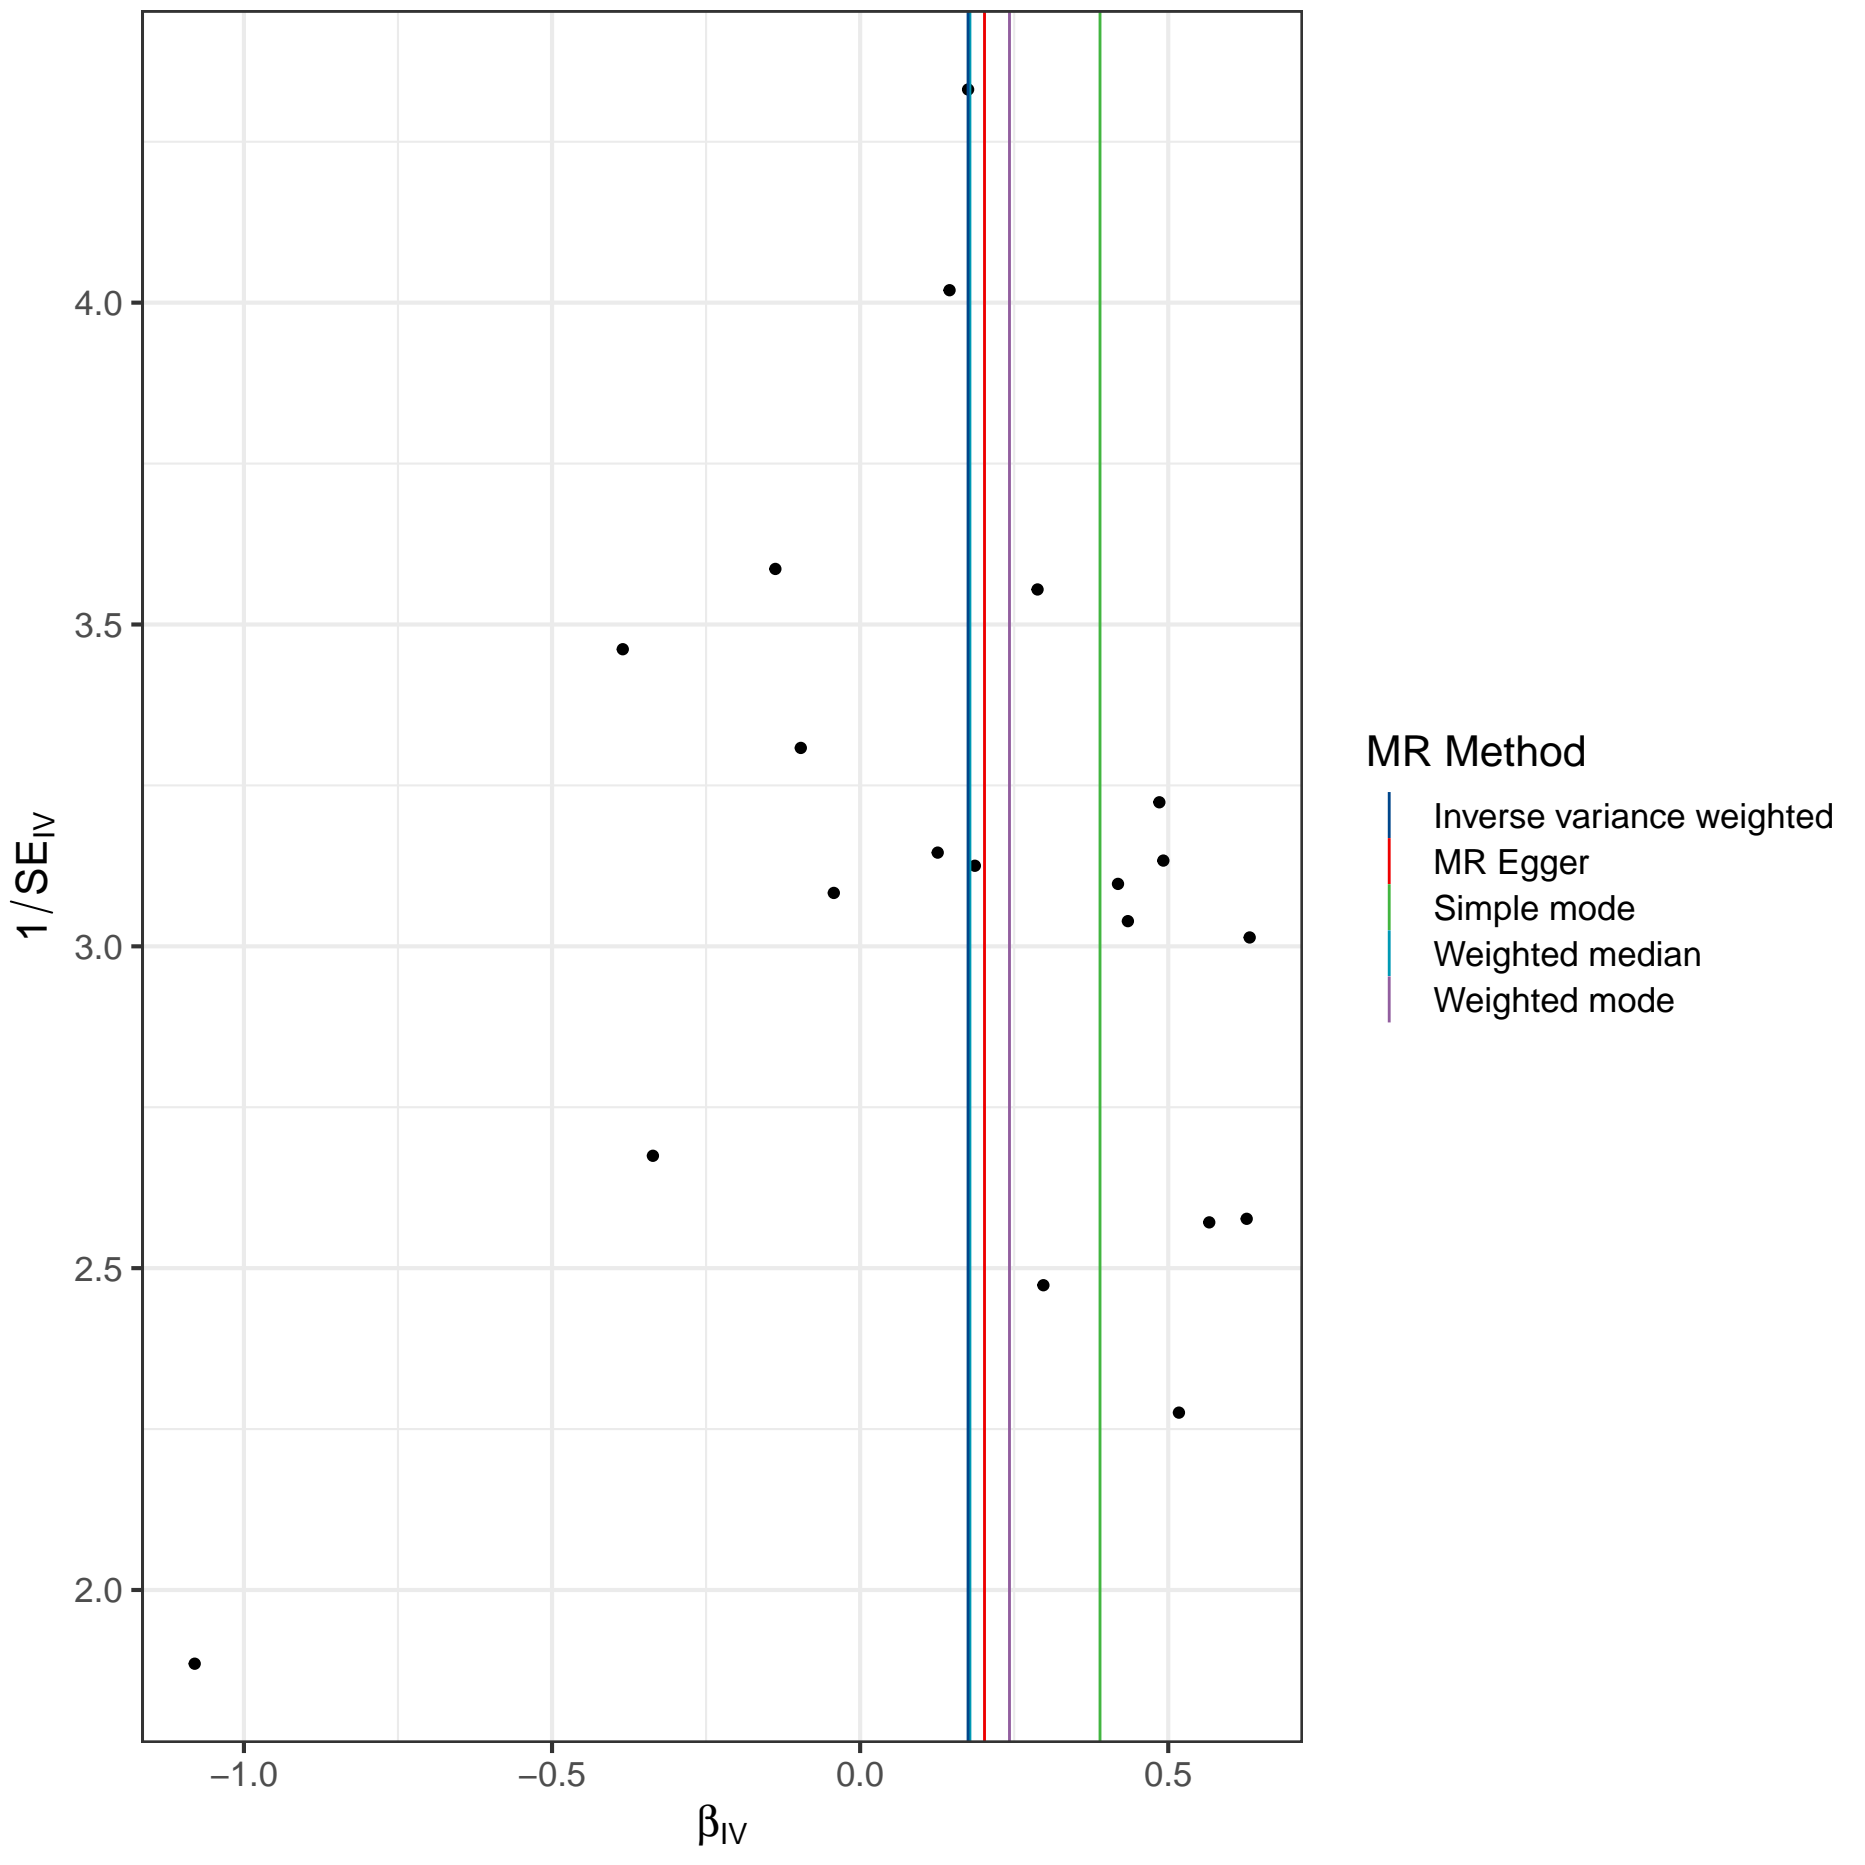

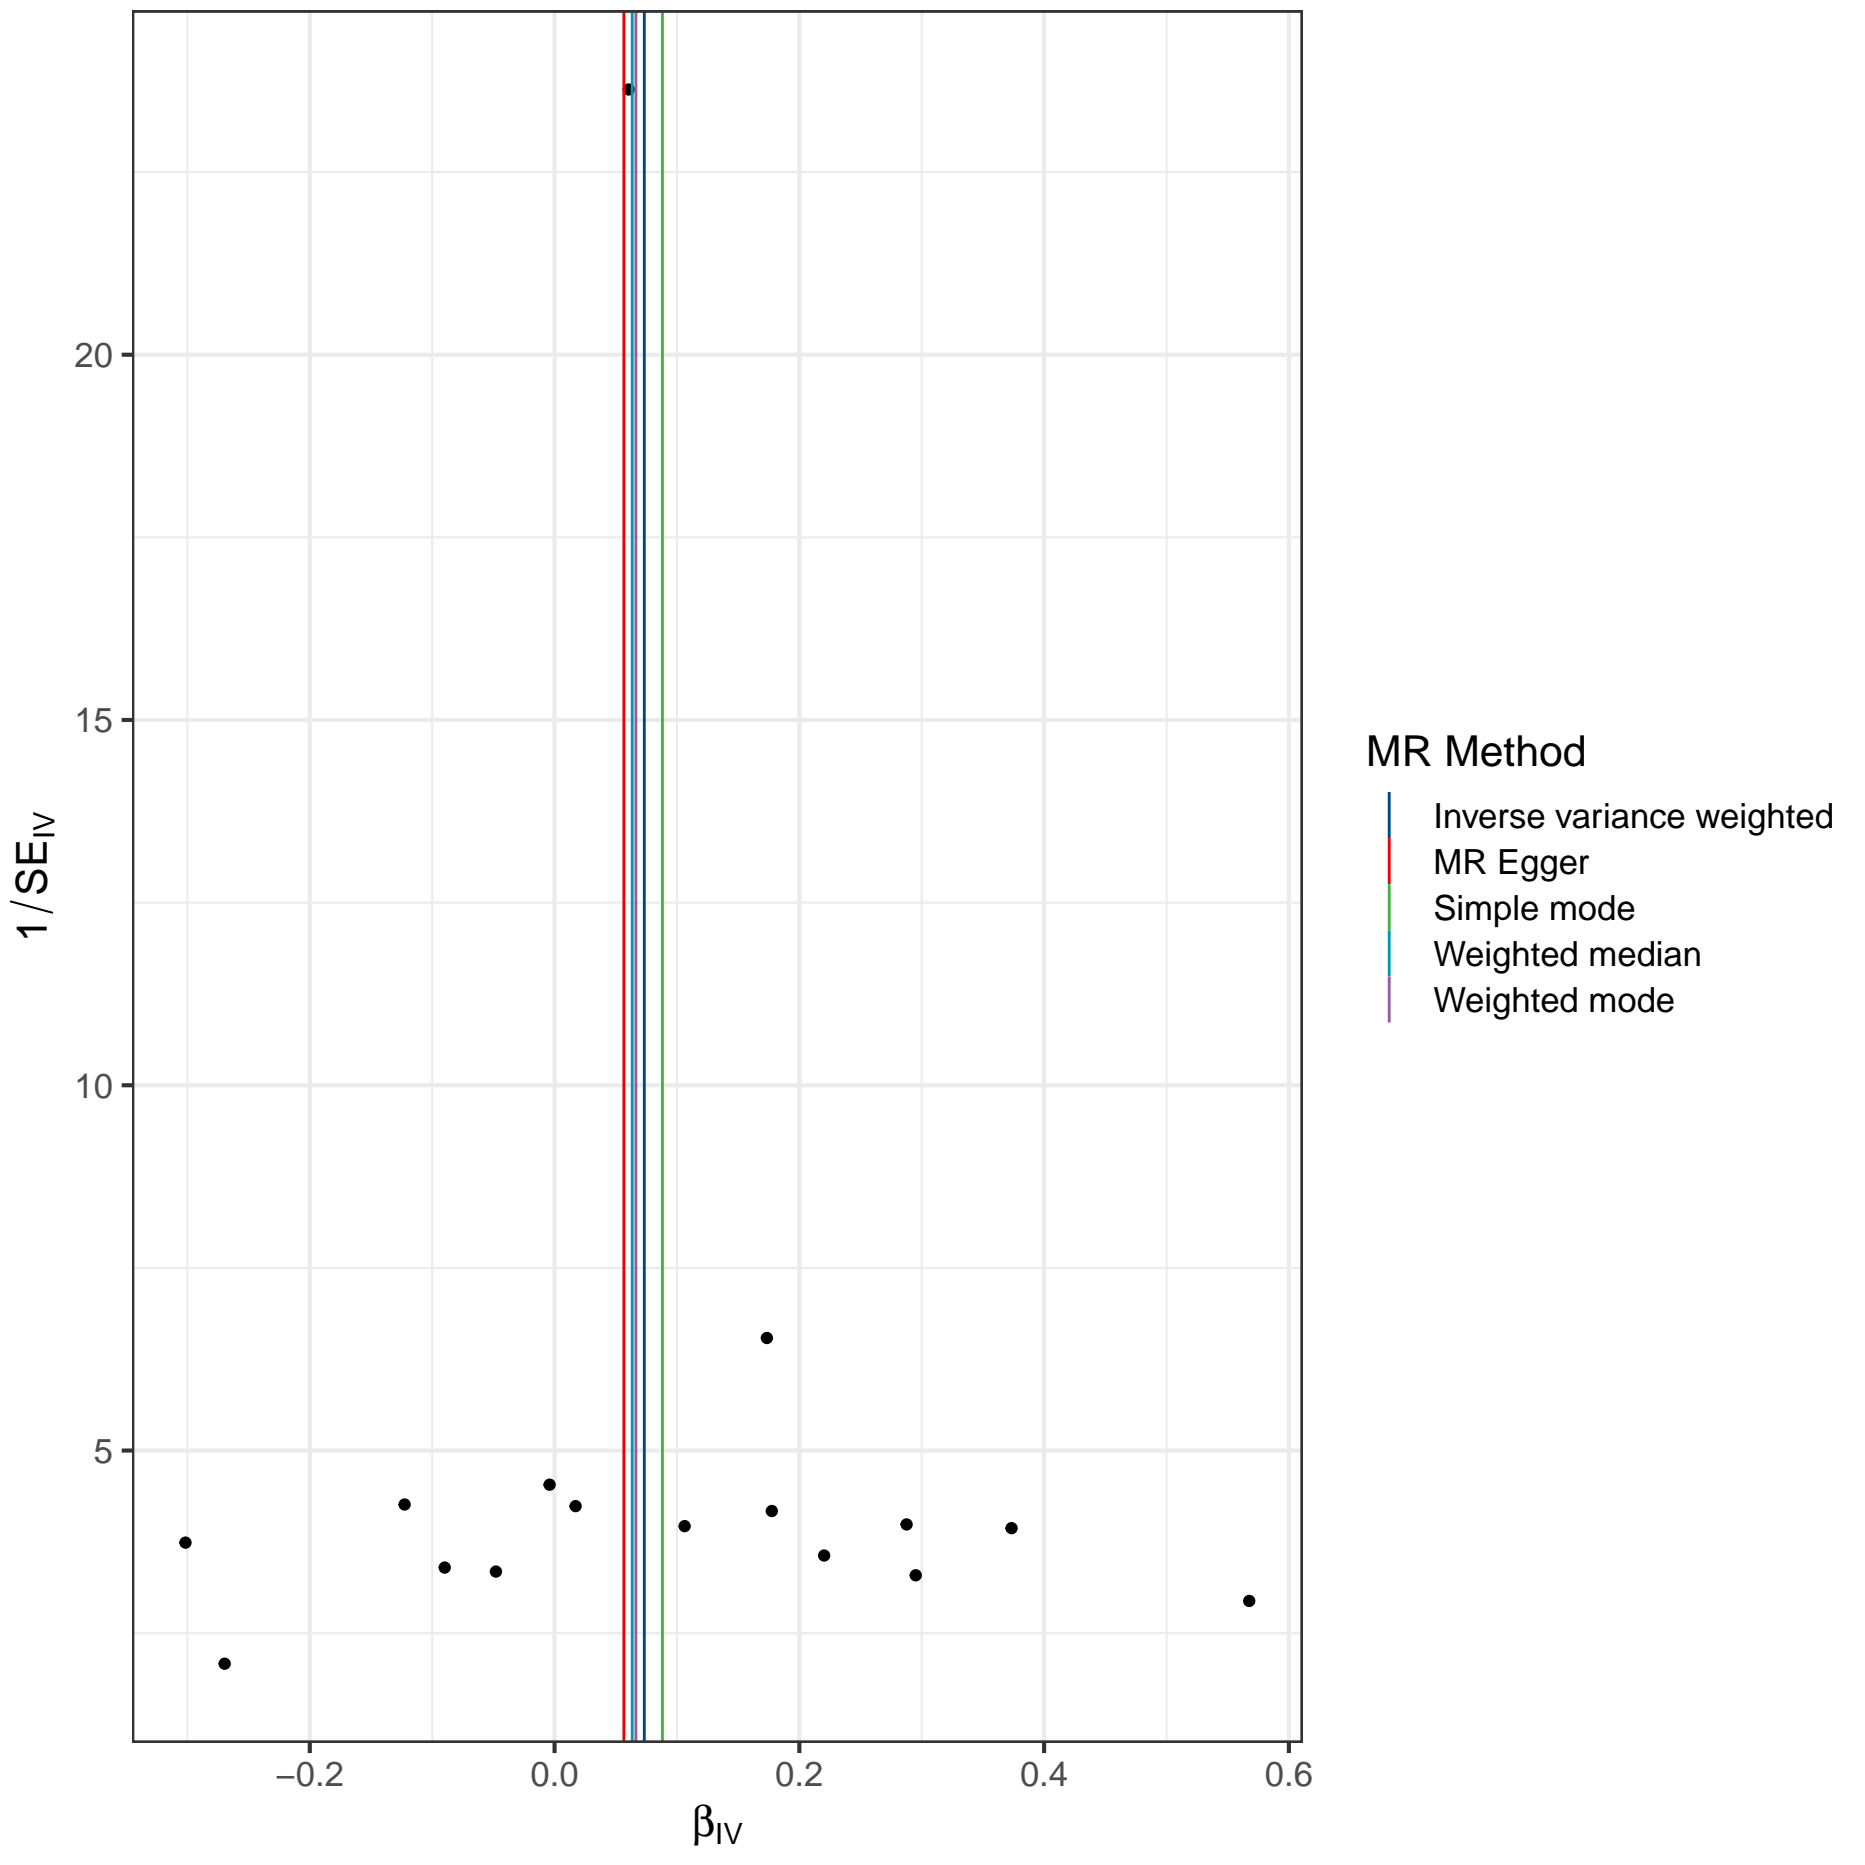

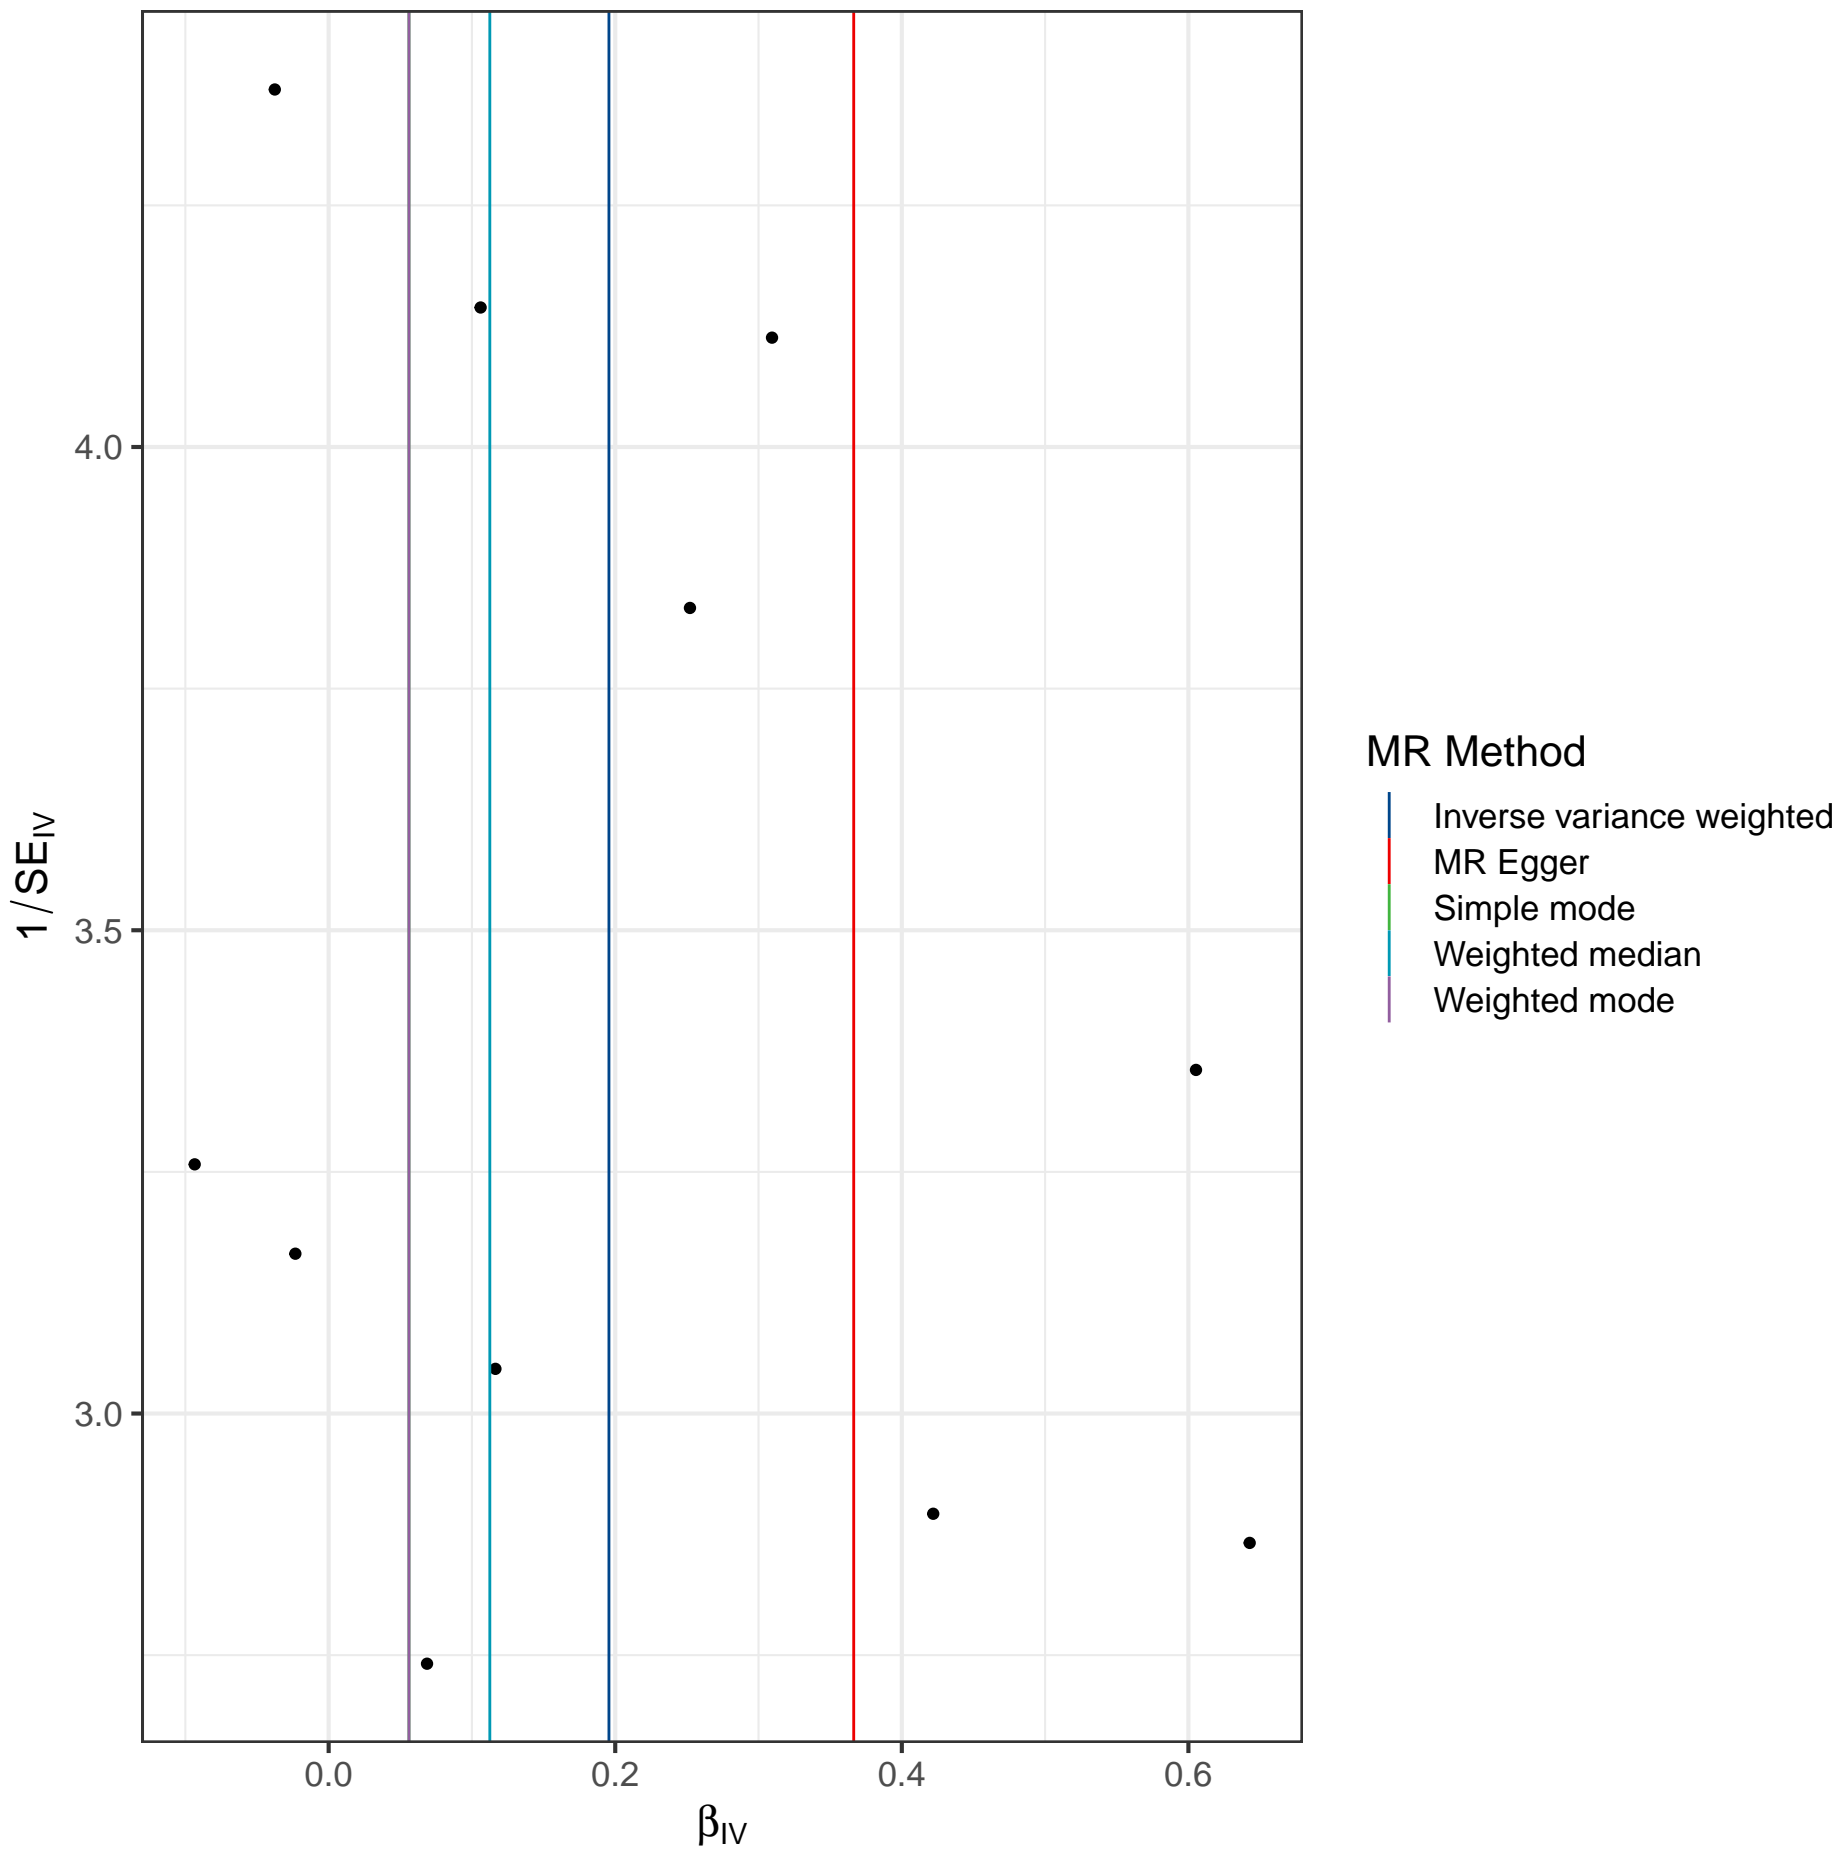

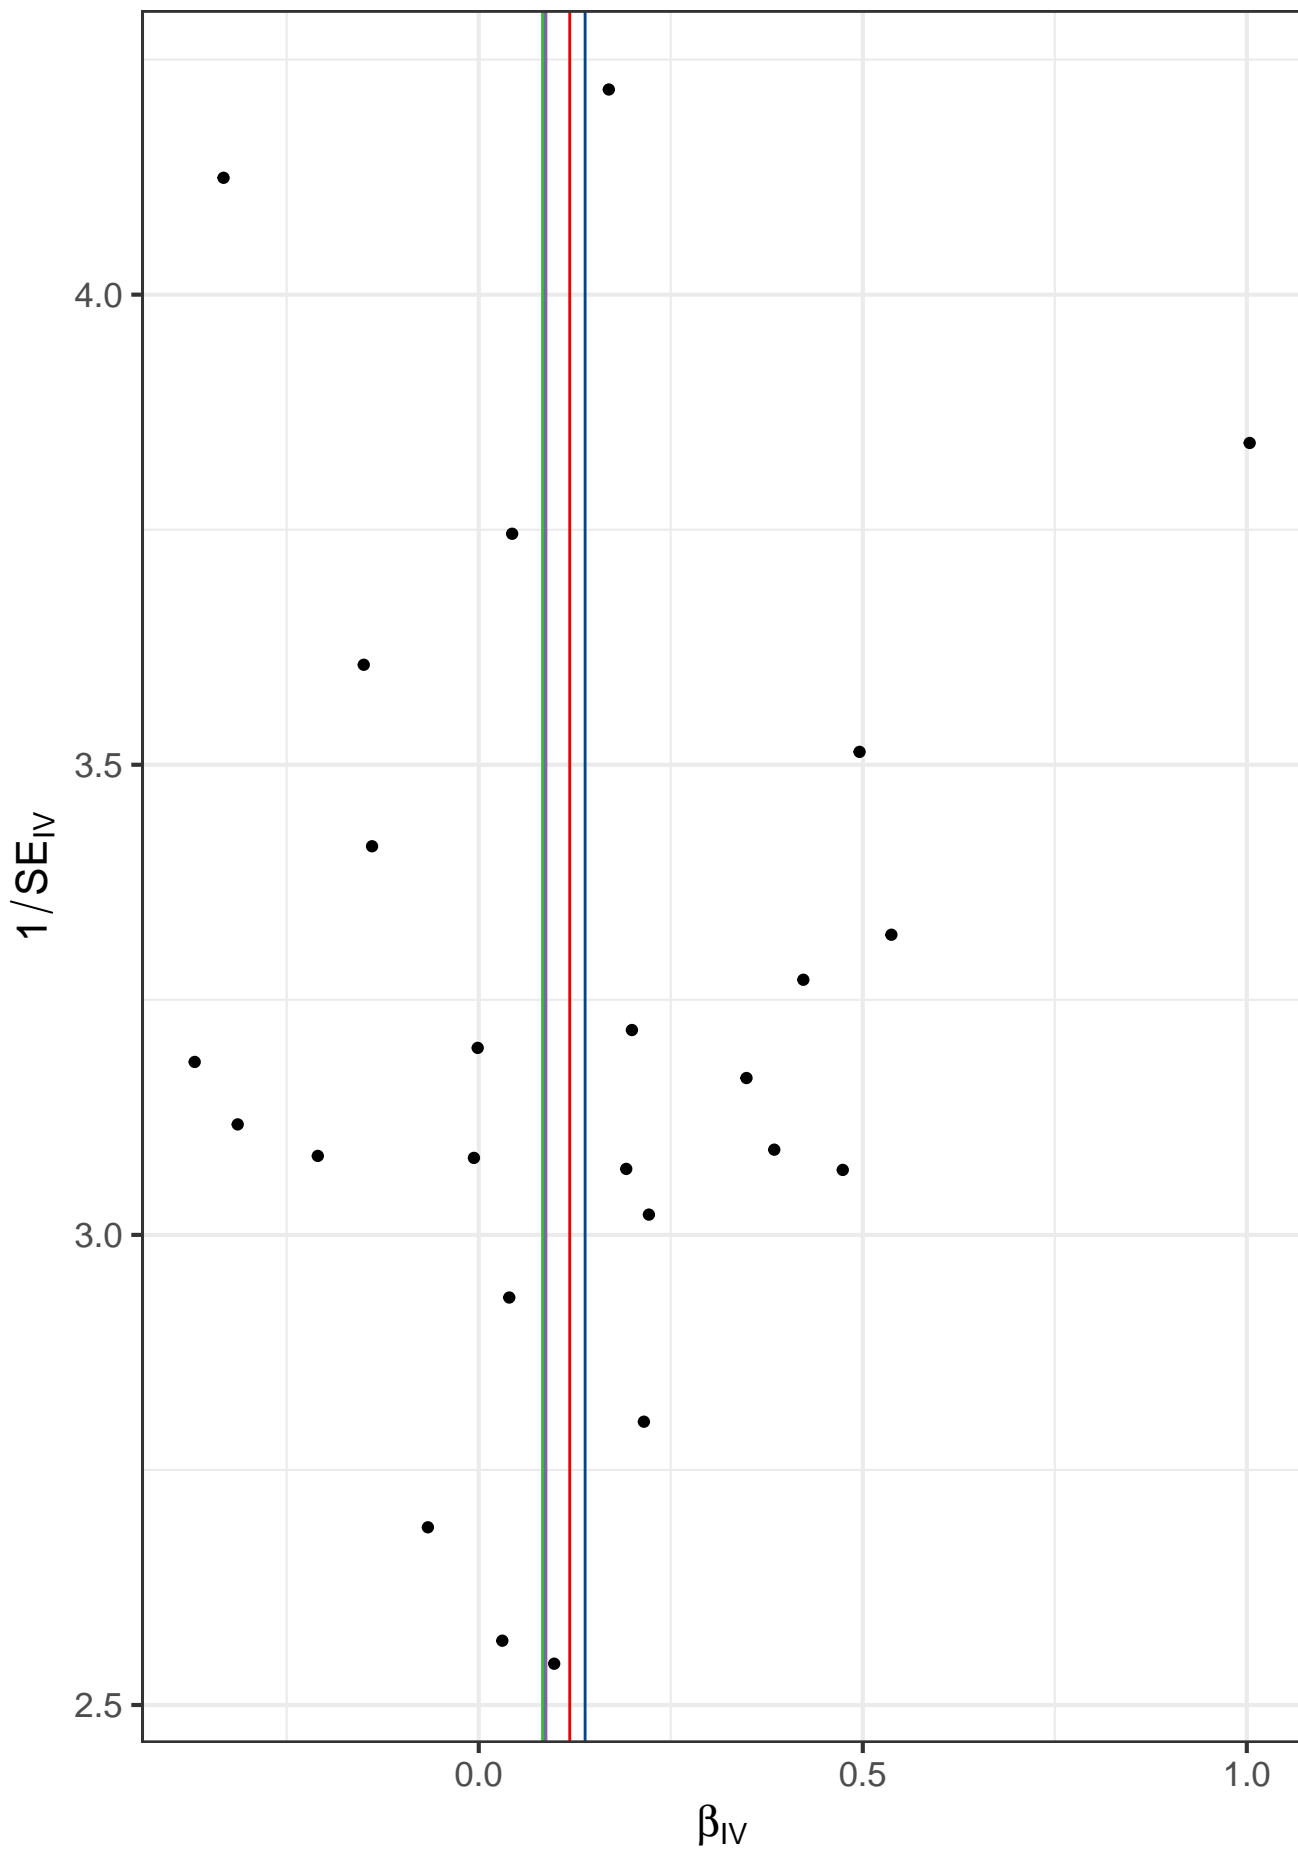

- MR Method
- Inverse variance weighted
  - MR Egger
  - Simple mode
  - Weighted median
  - Weighted mode



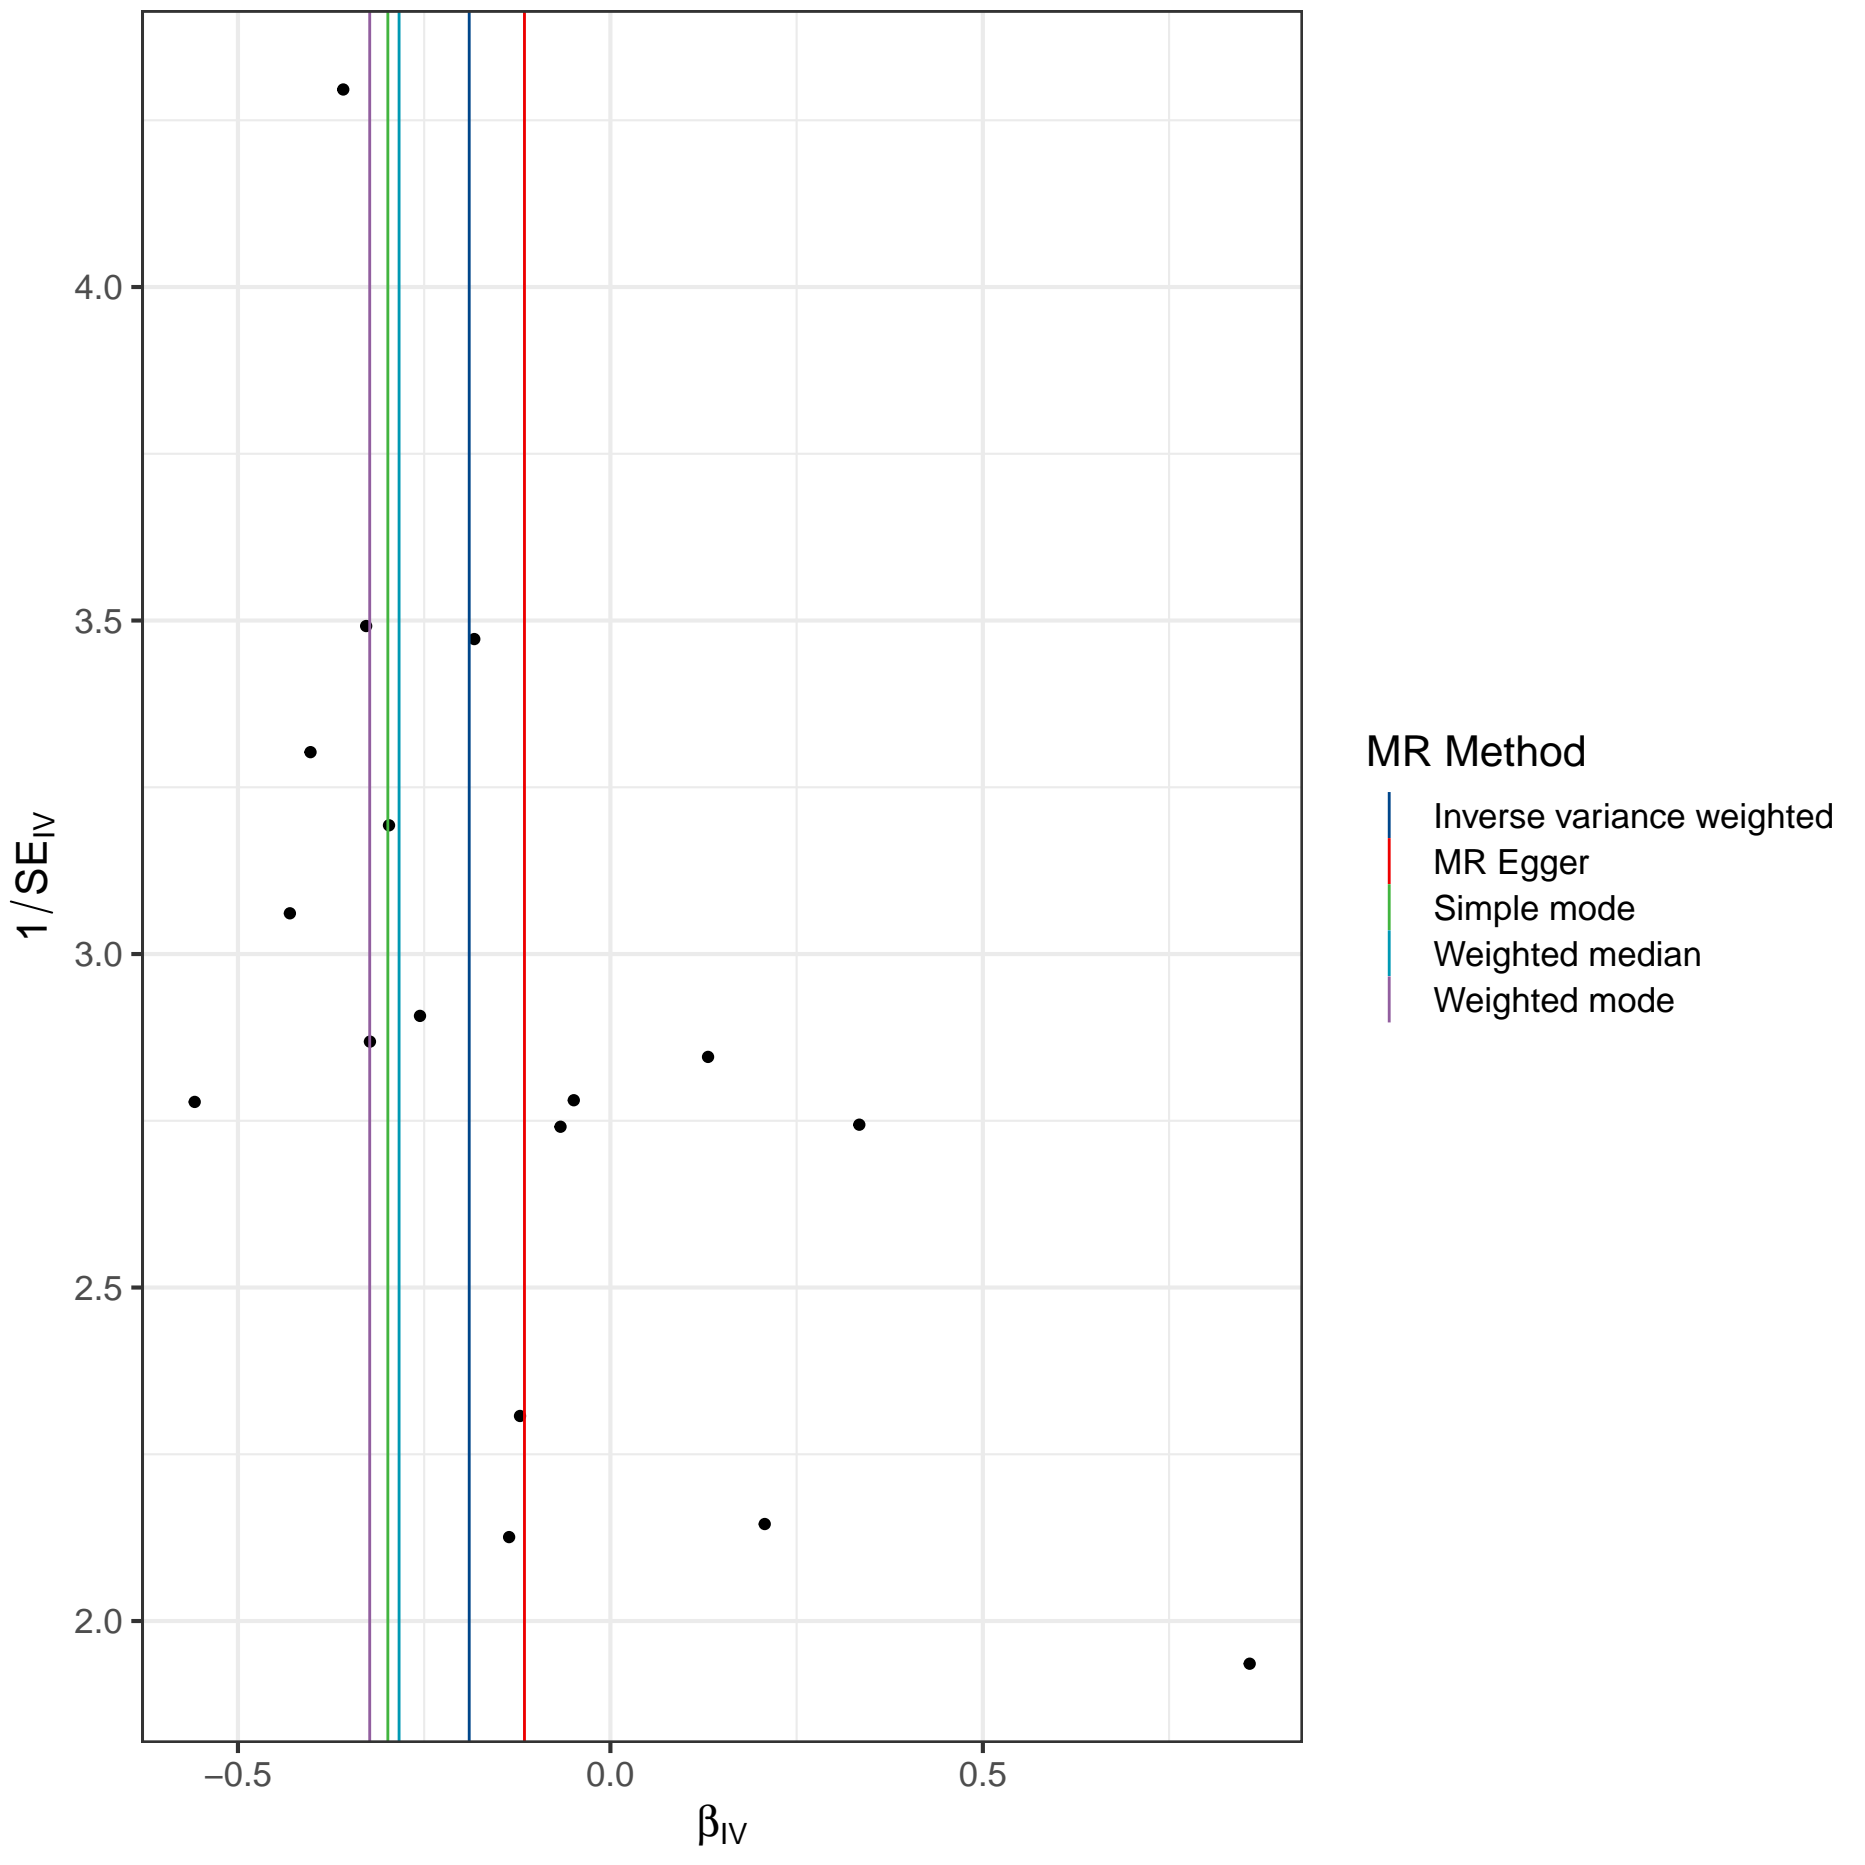

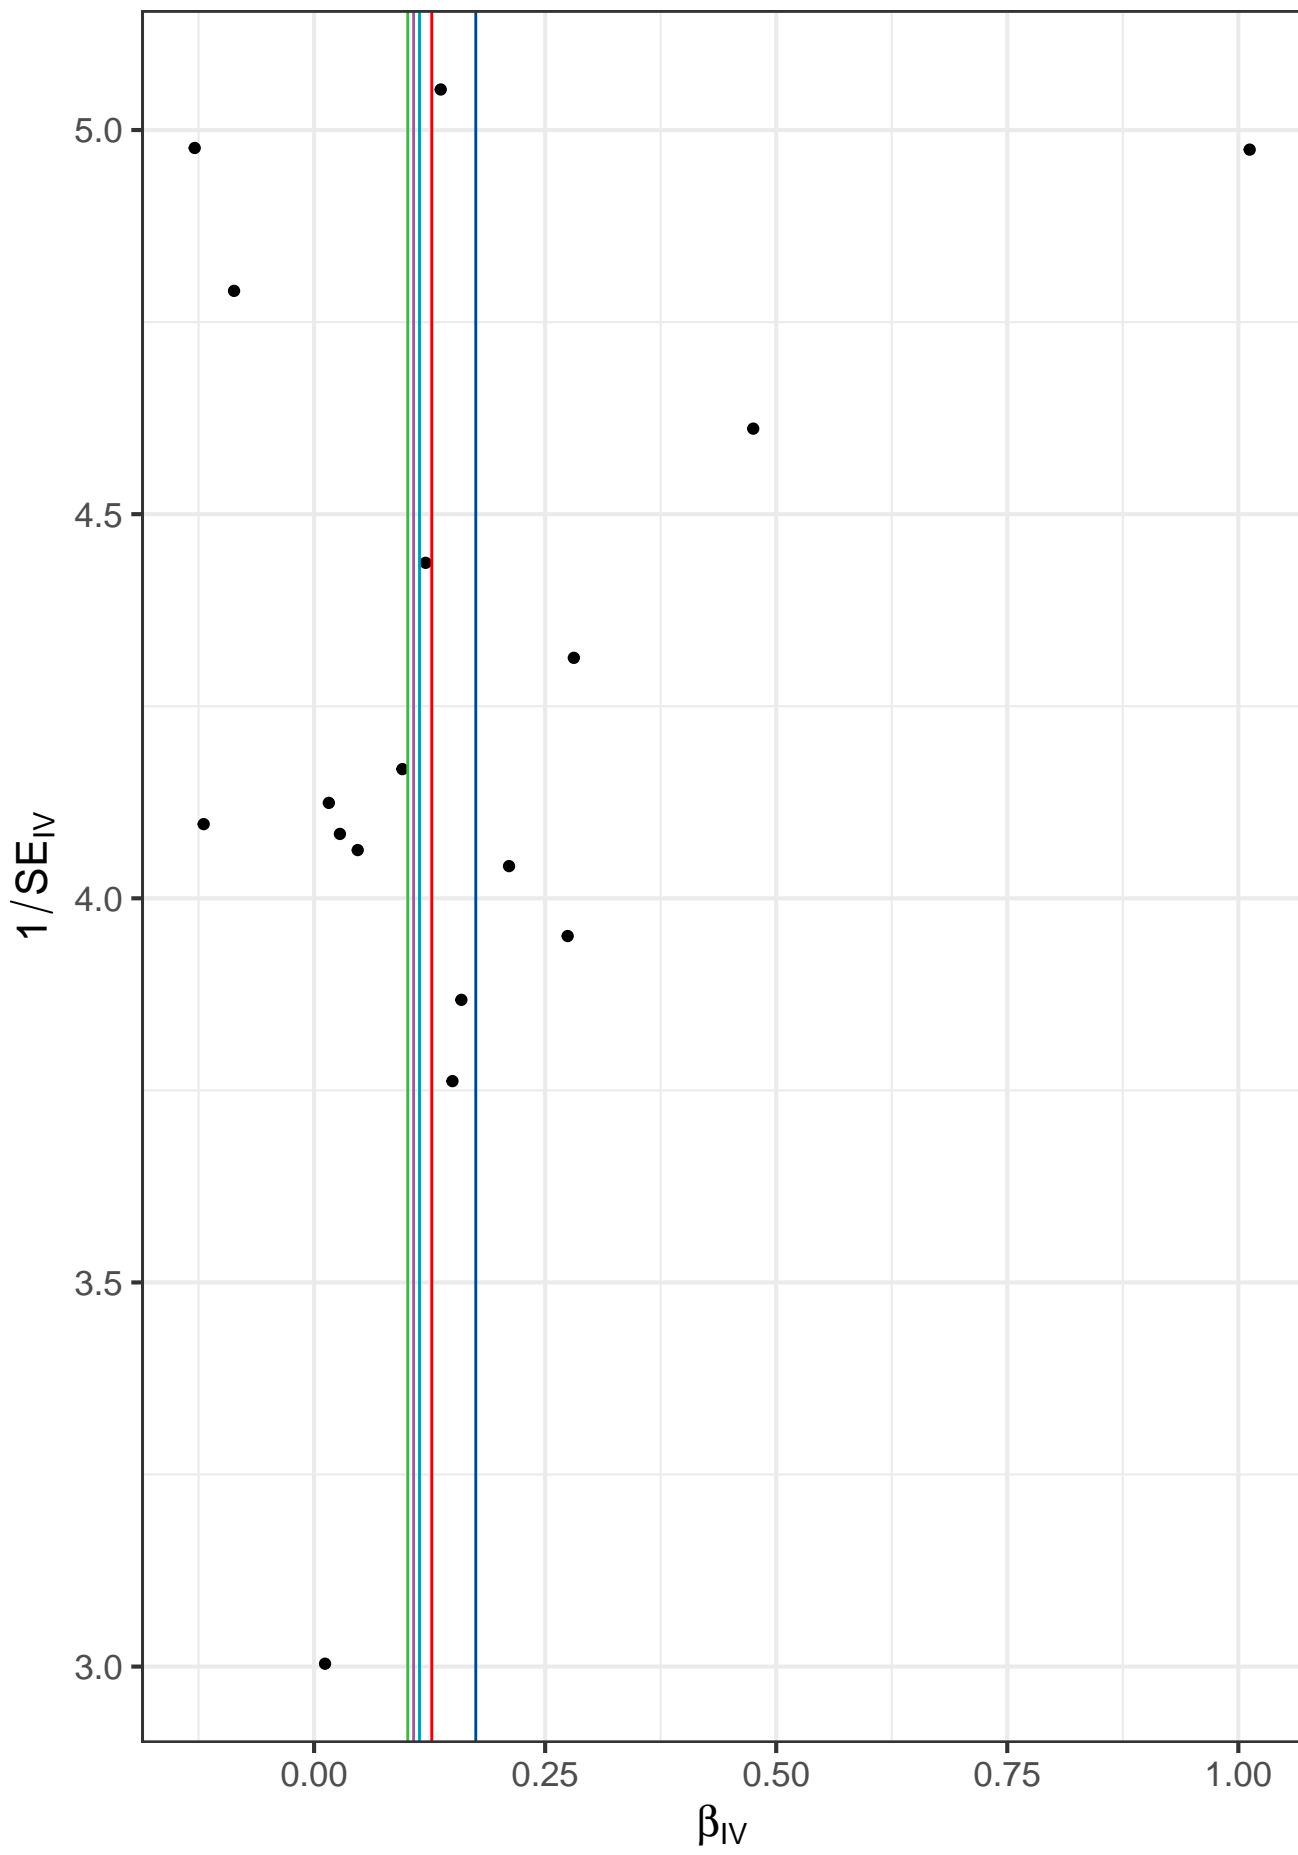

MR Method

- Inverse variance weighted
- MR Egger
- Simple mode
- Weighted median
- Weighted mode

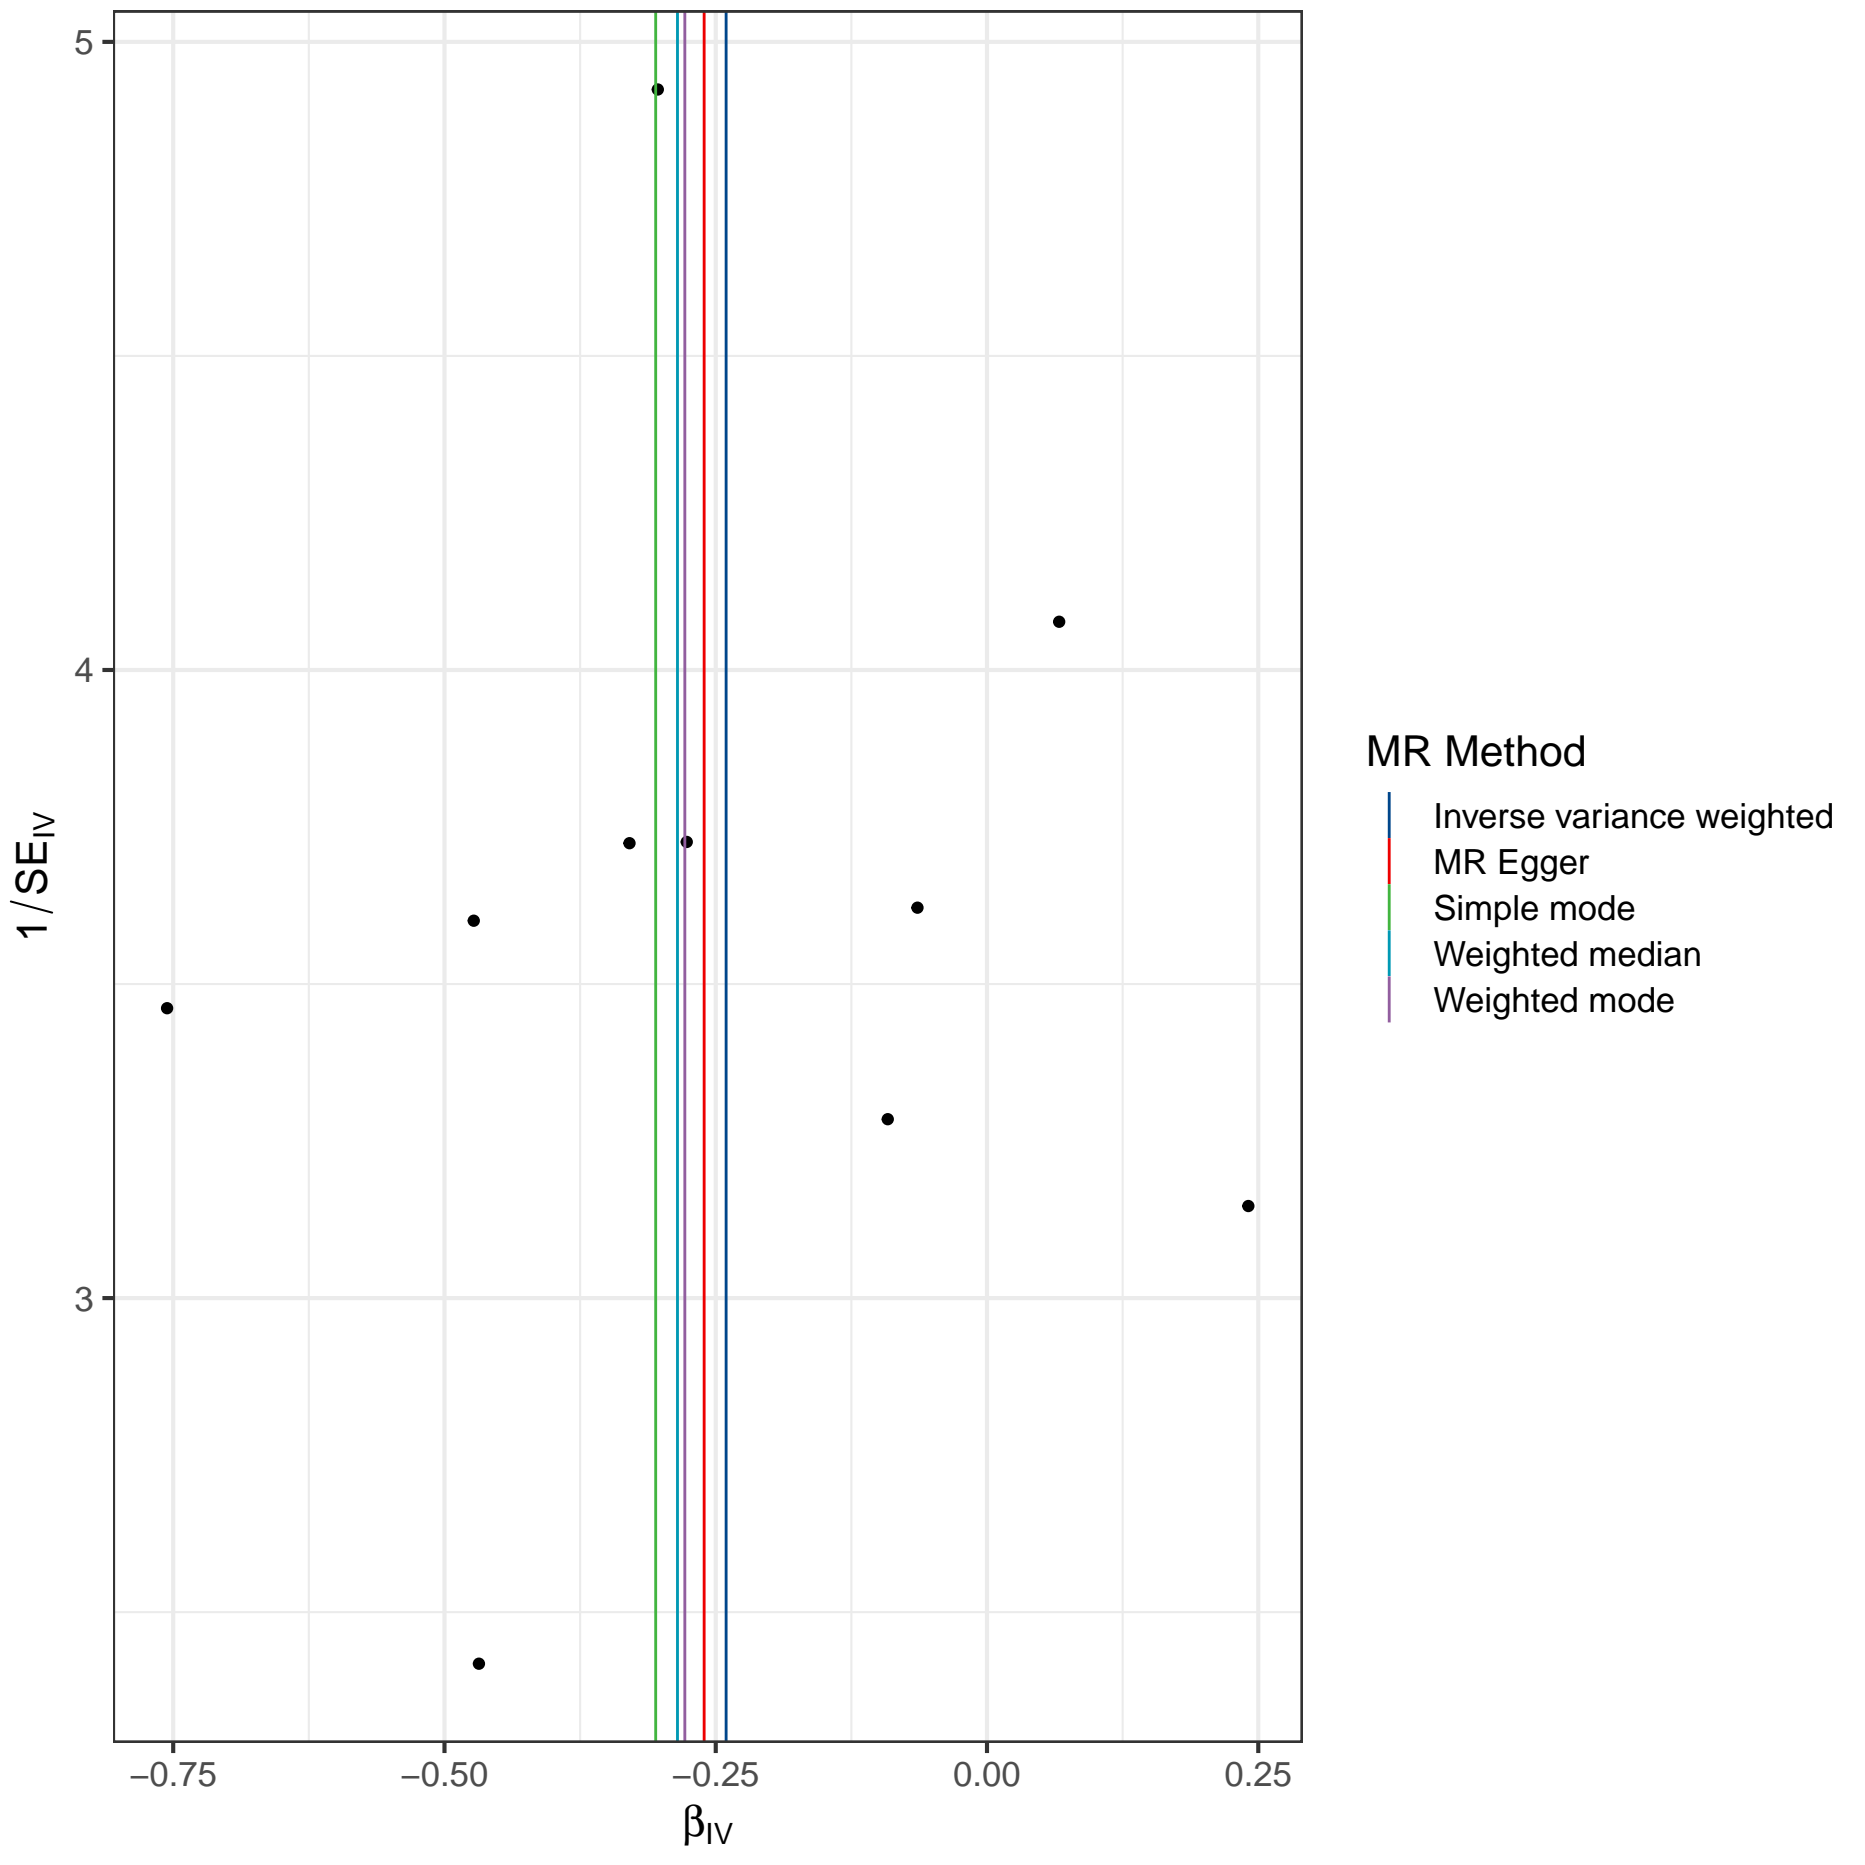

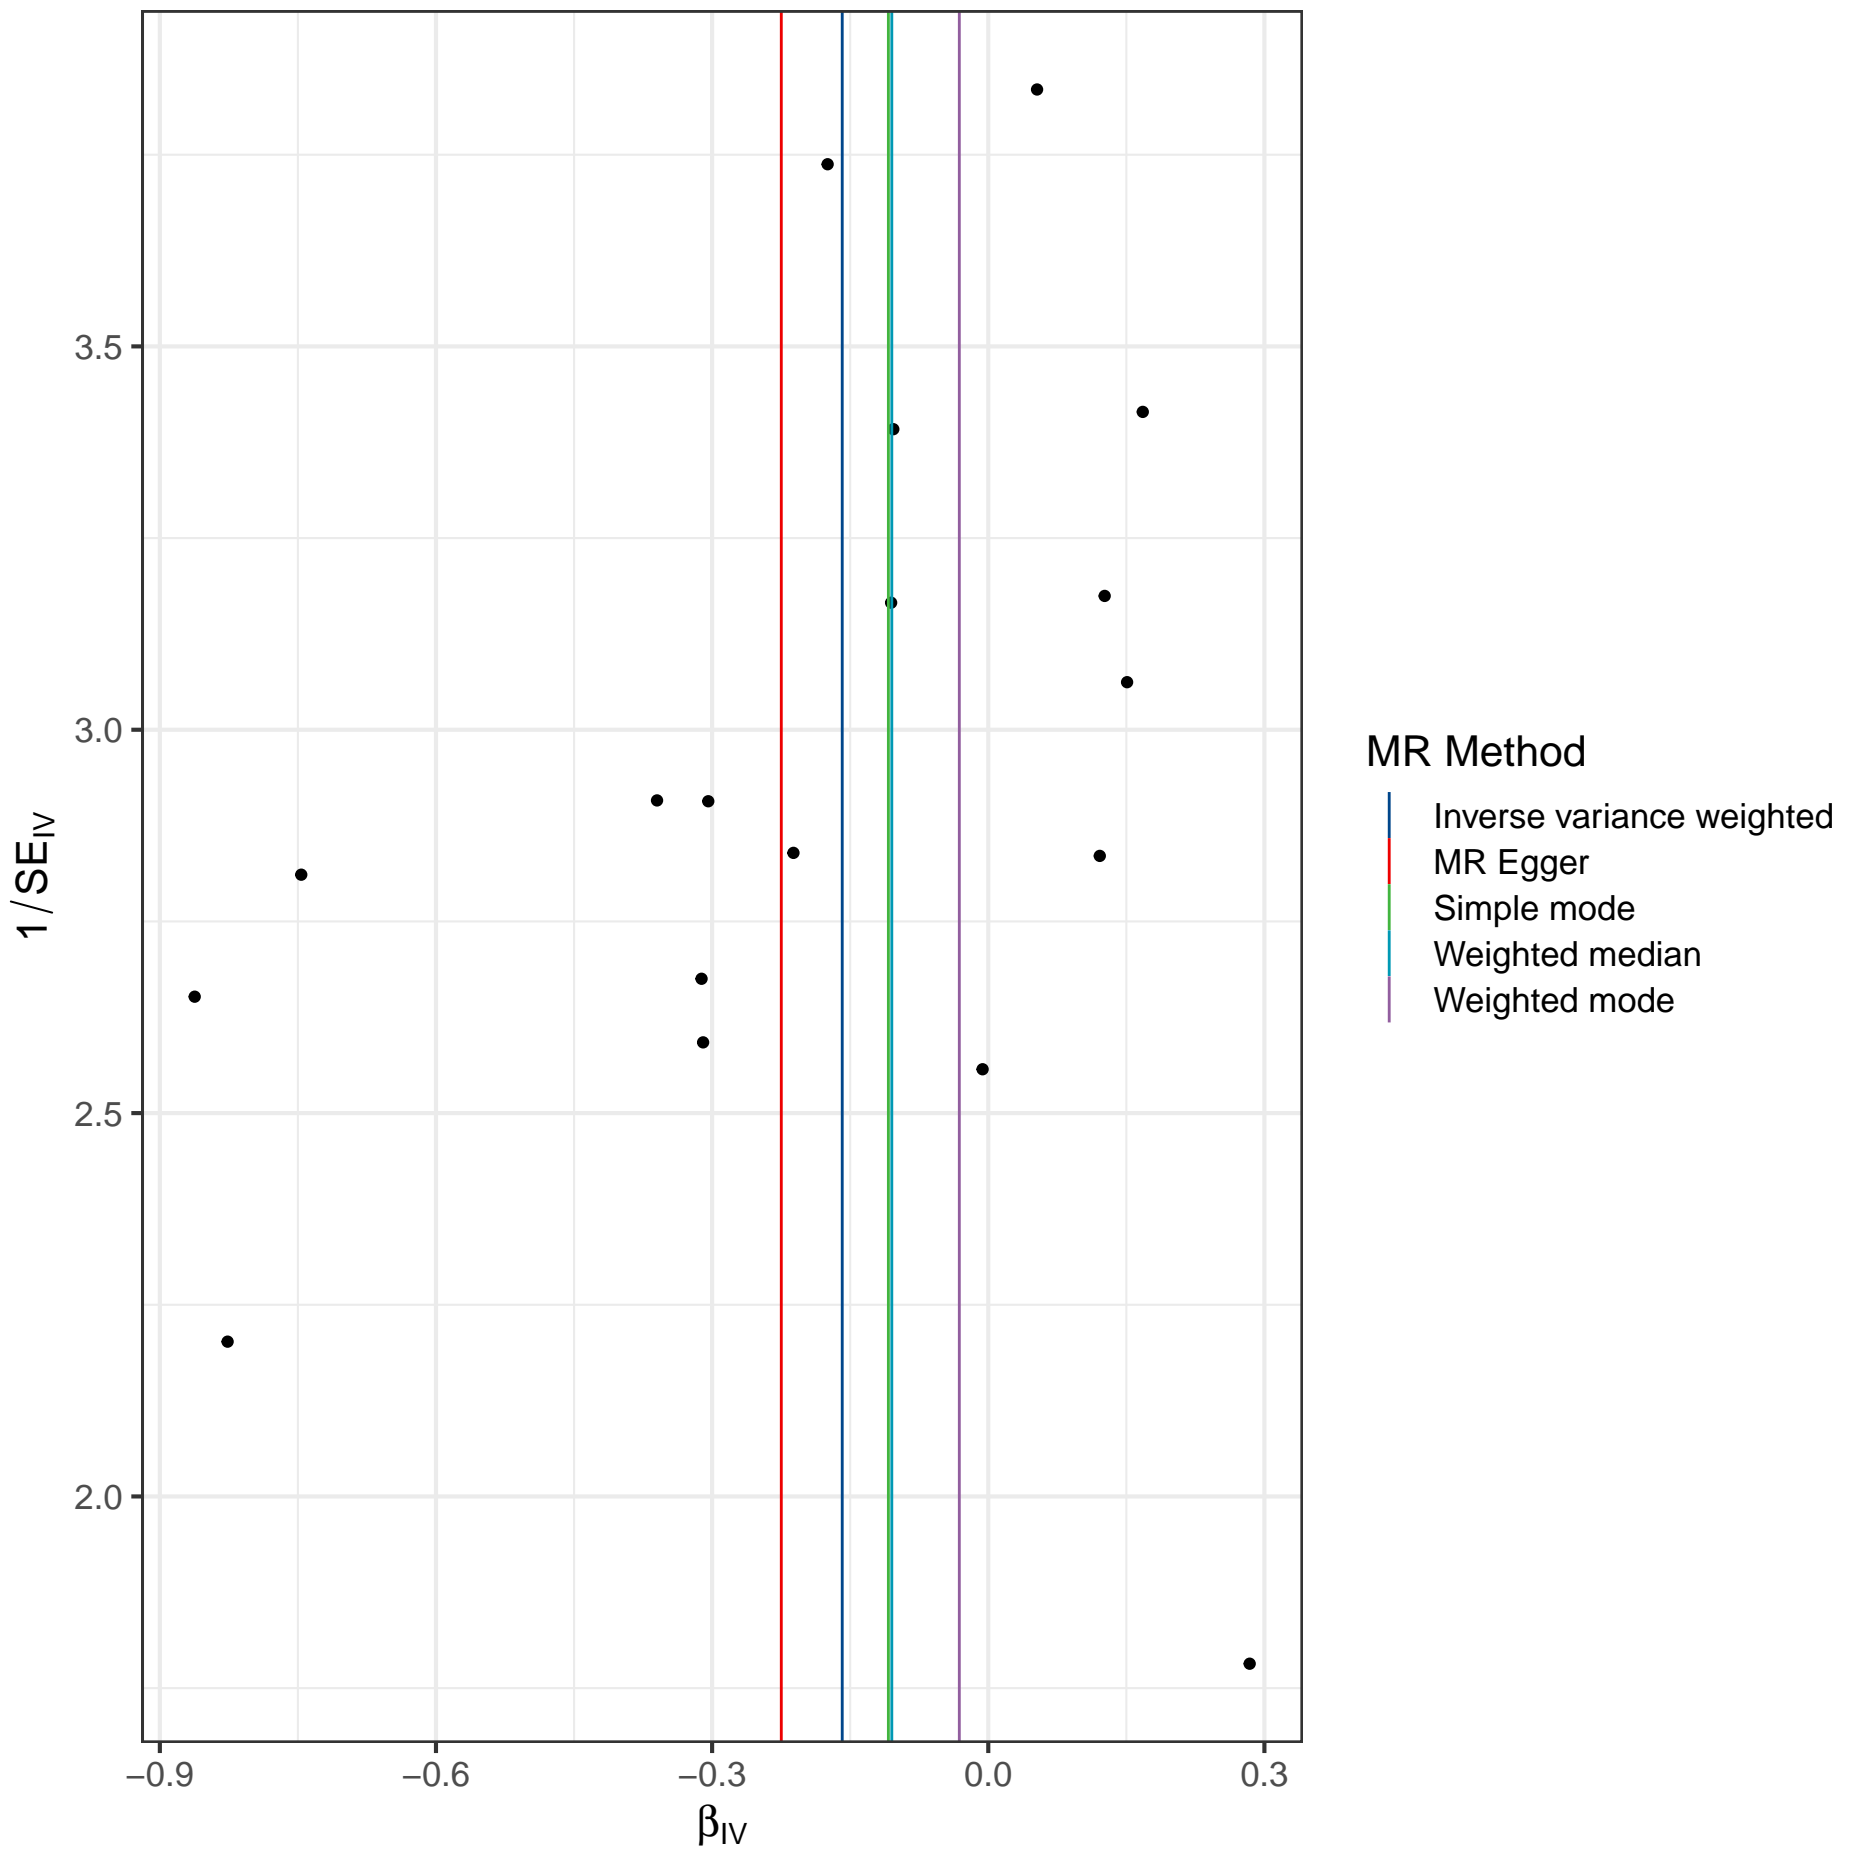

- MR Method
- Inverse variance weighted
  - MR Egger
  - Simple mode
  - Weighted median
  - Weighted mode

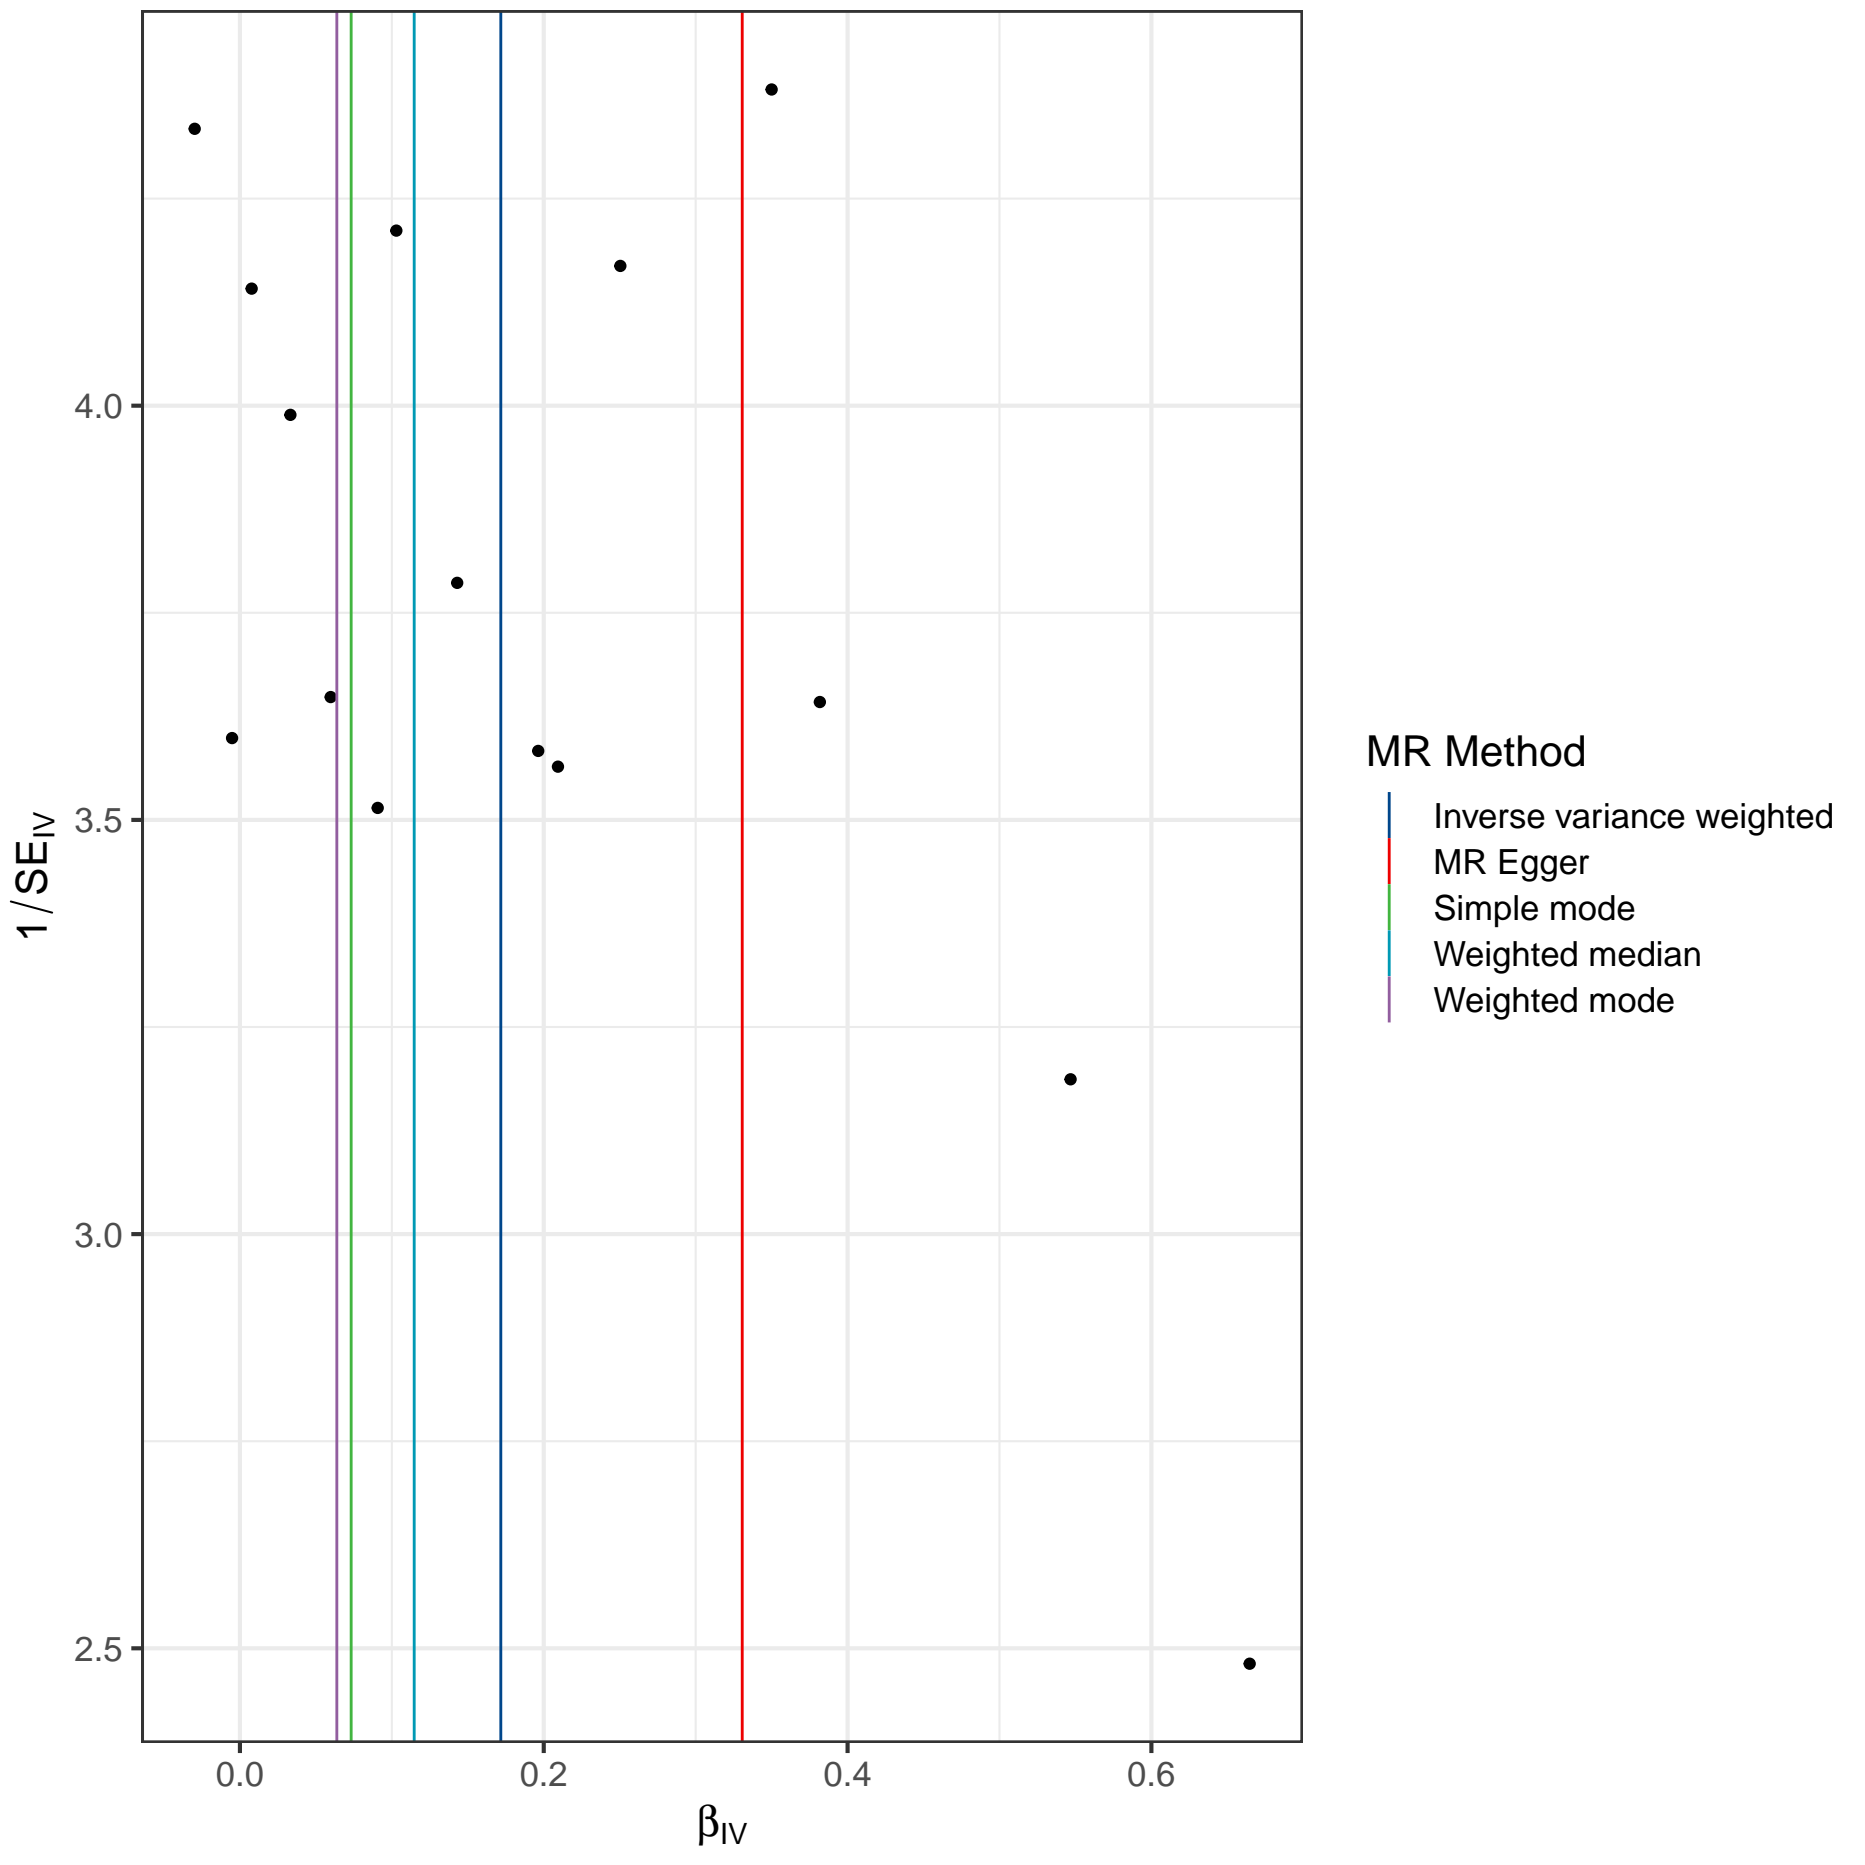

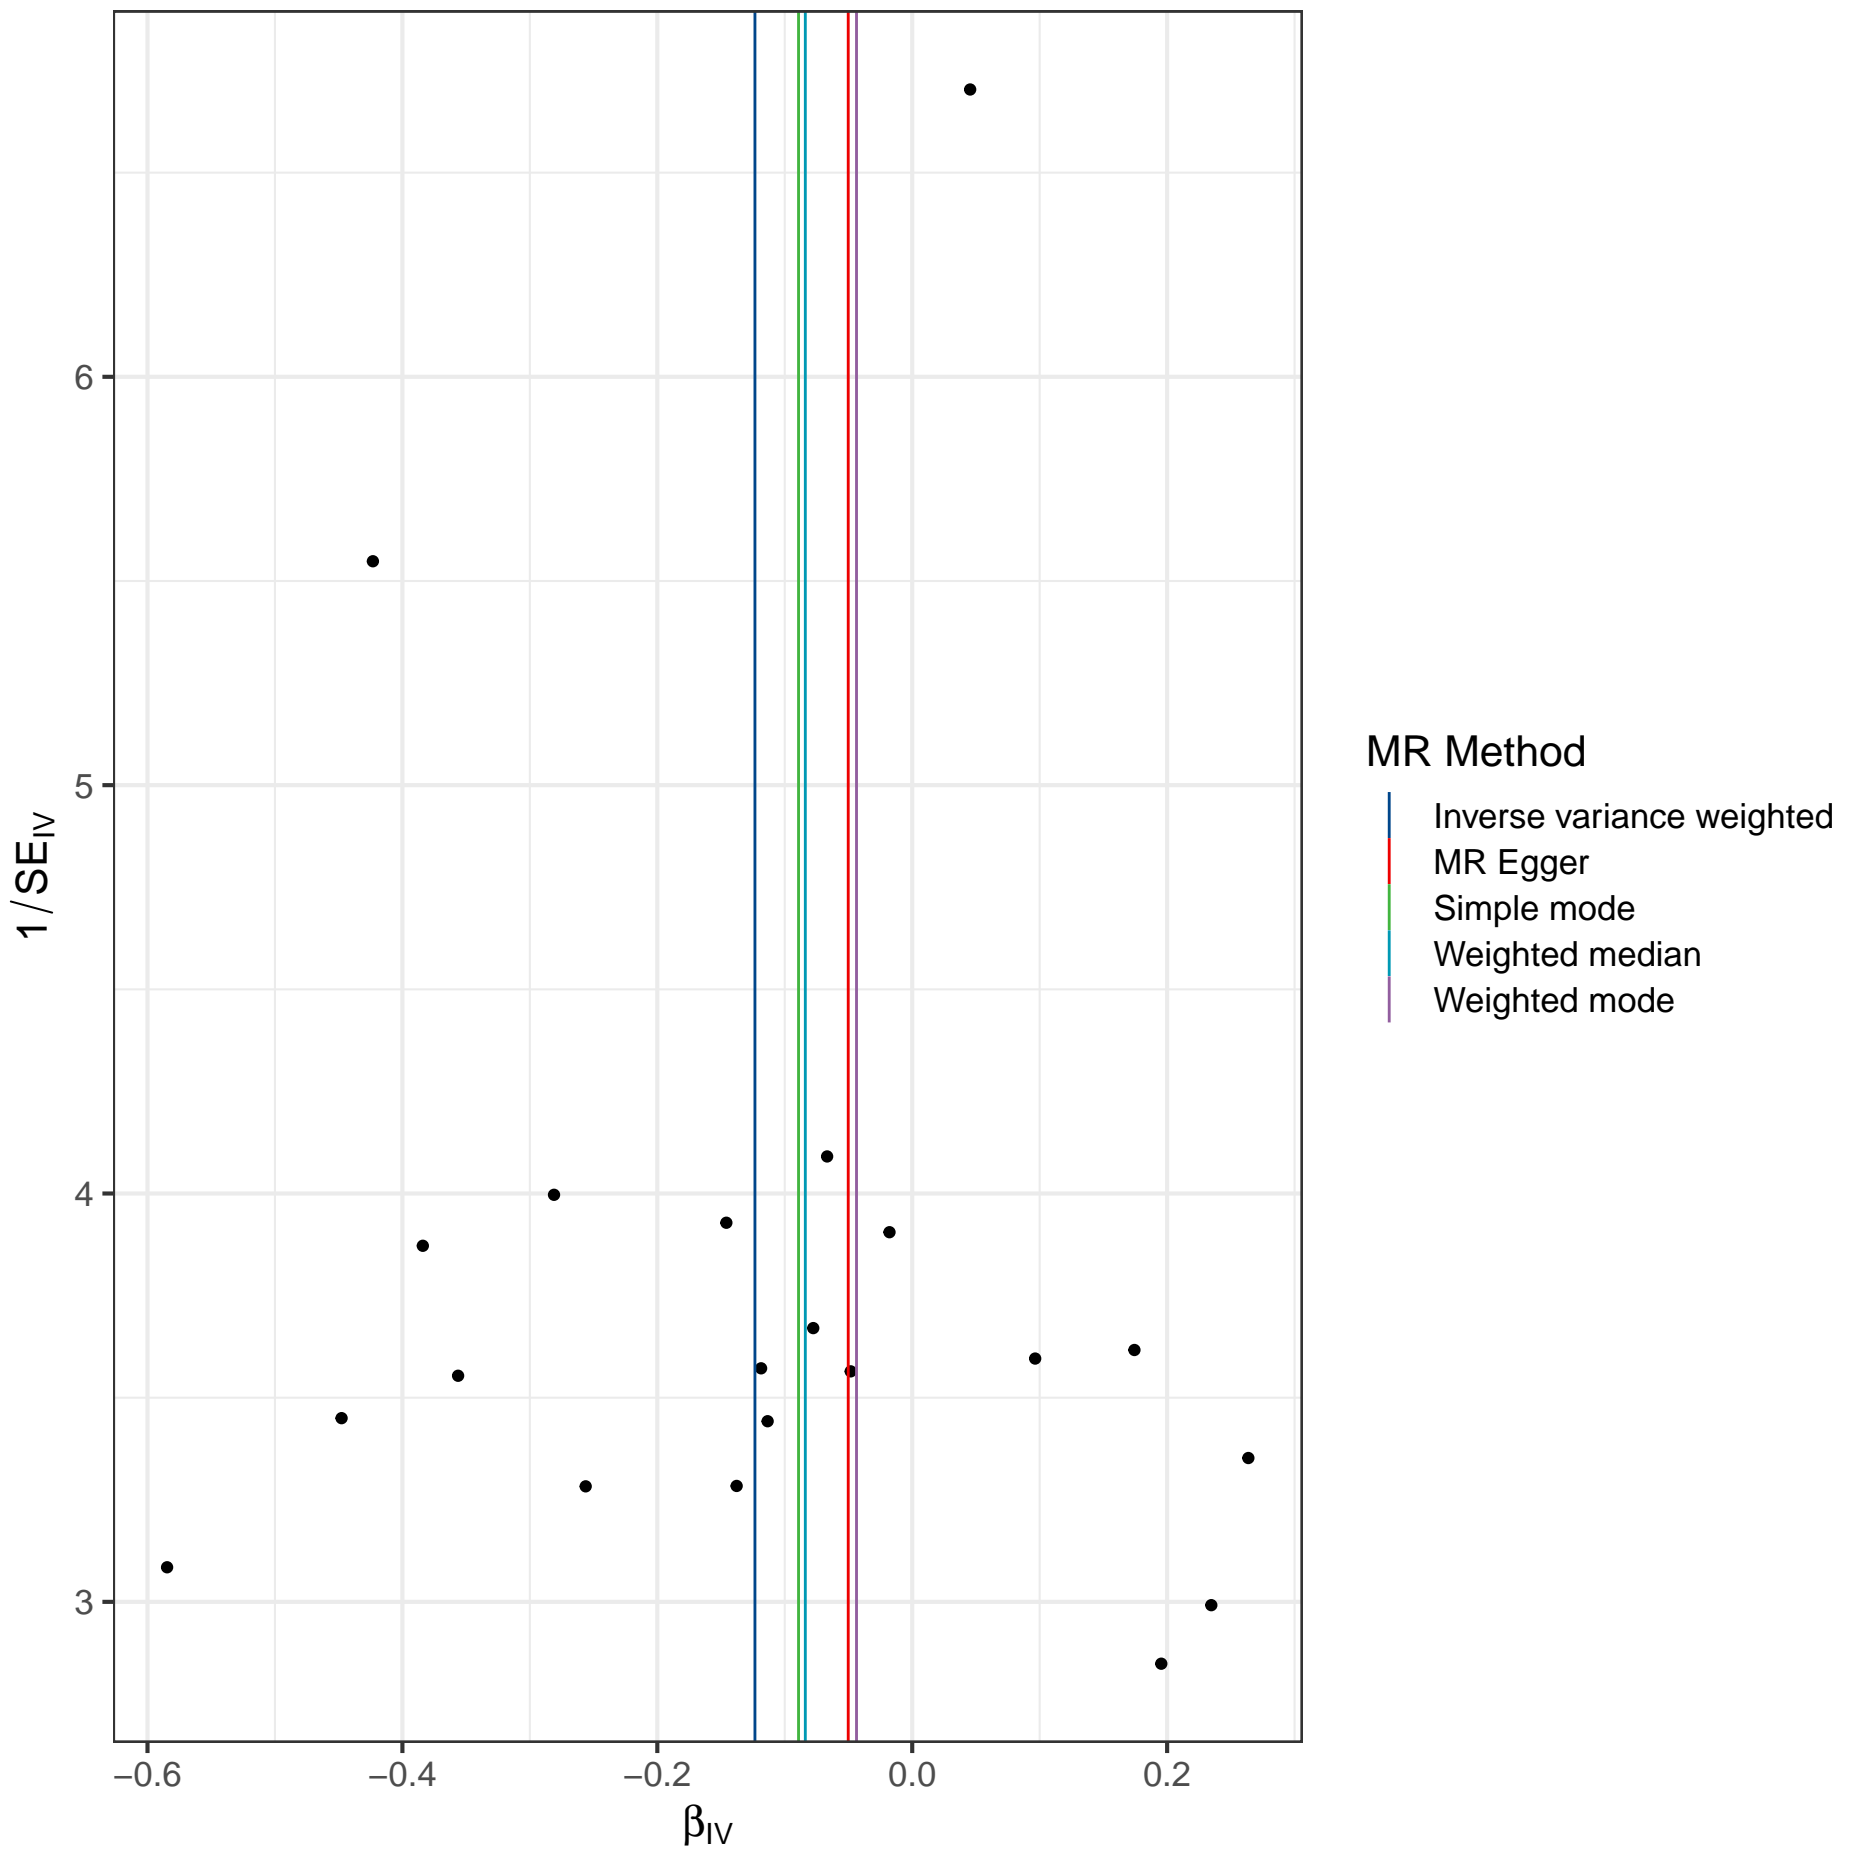

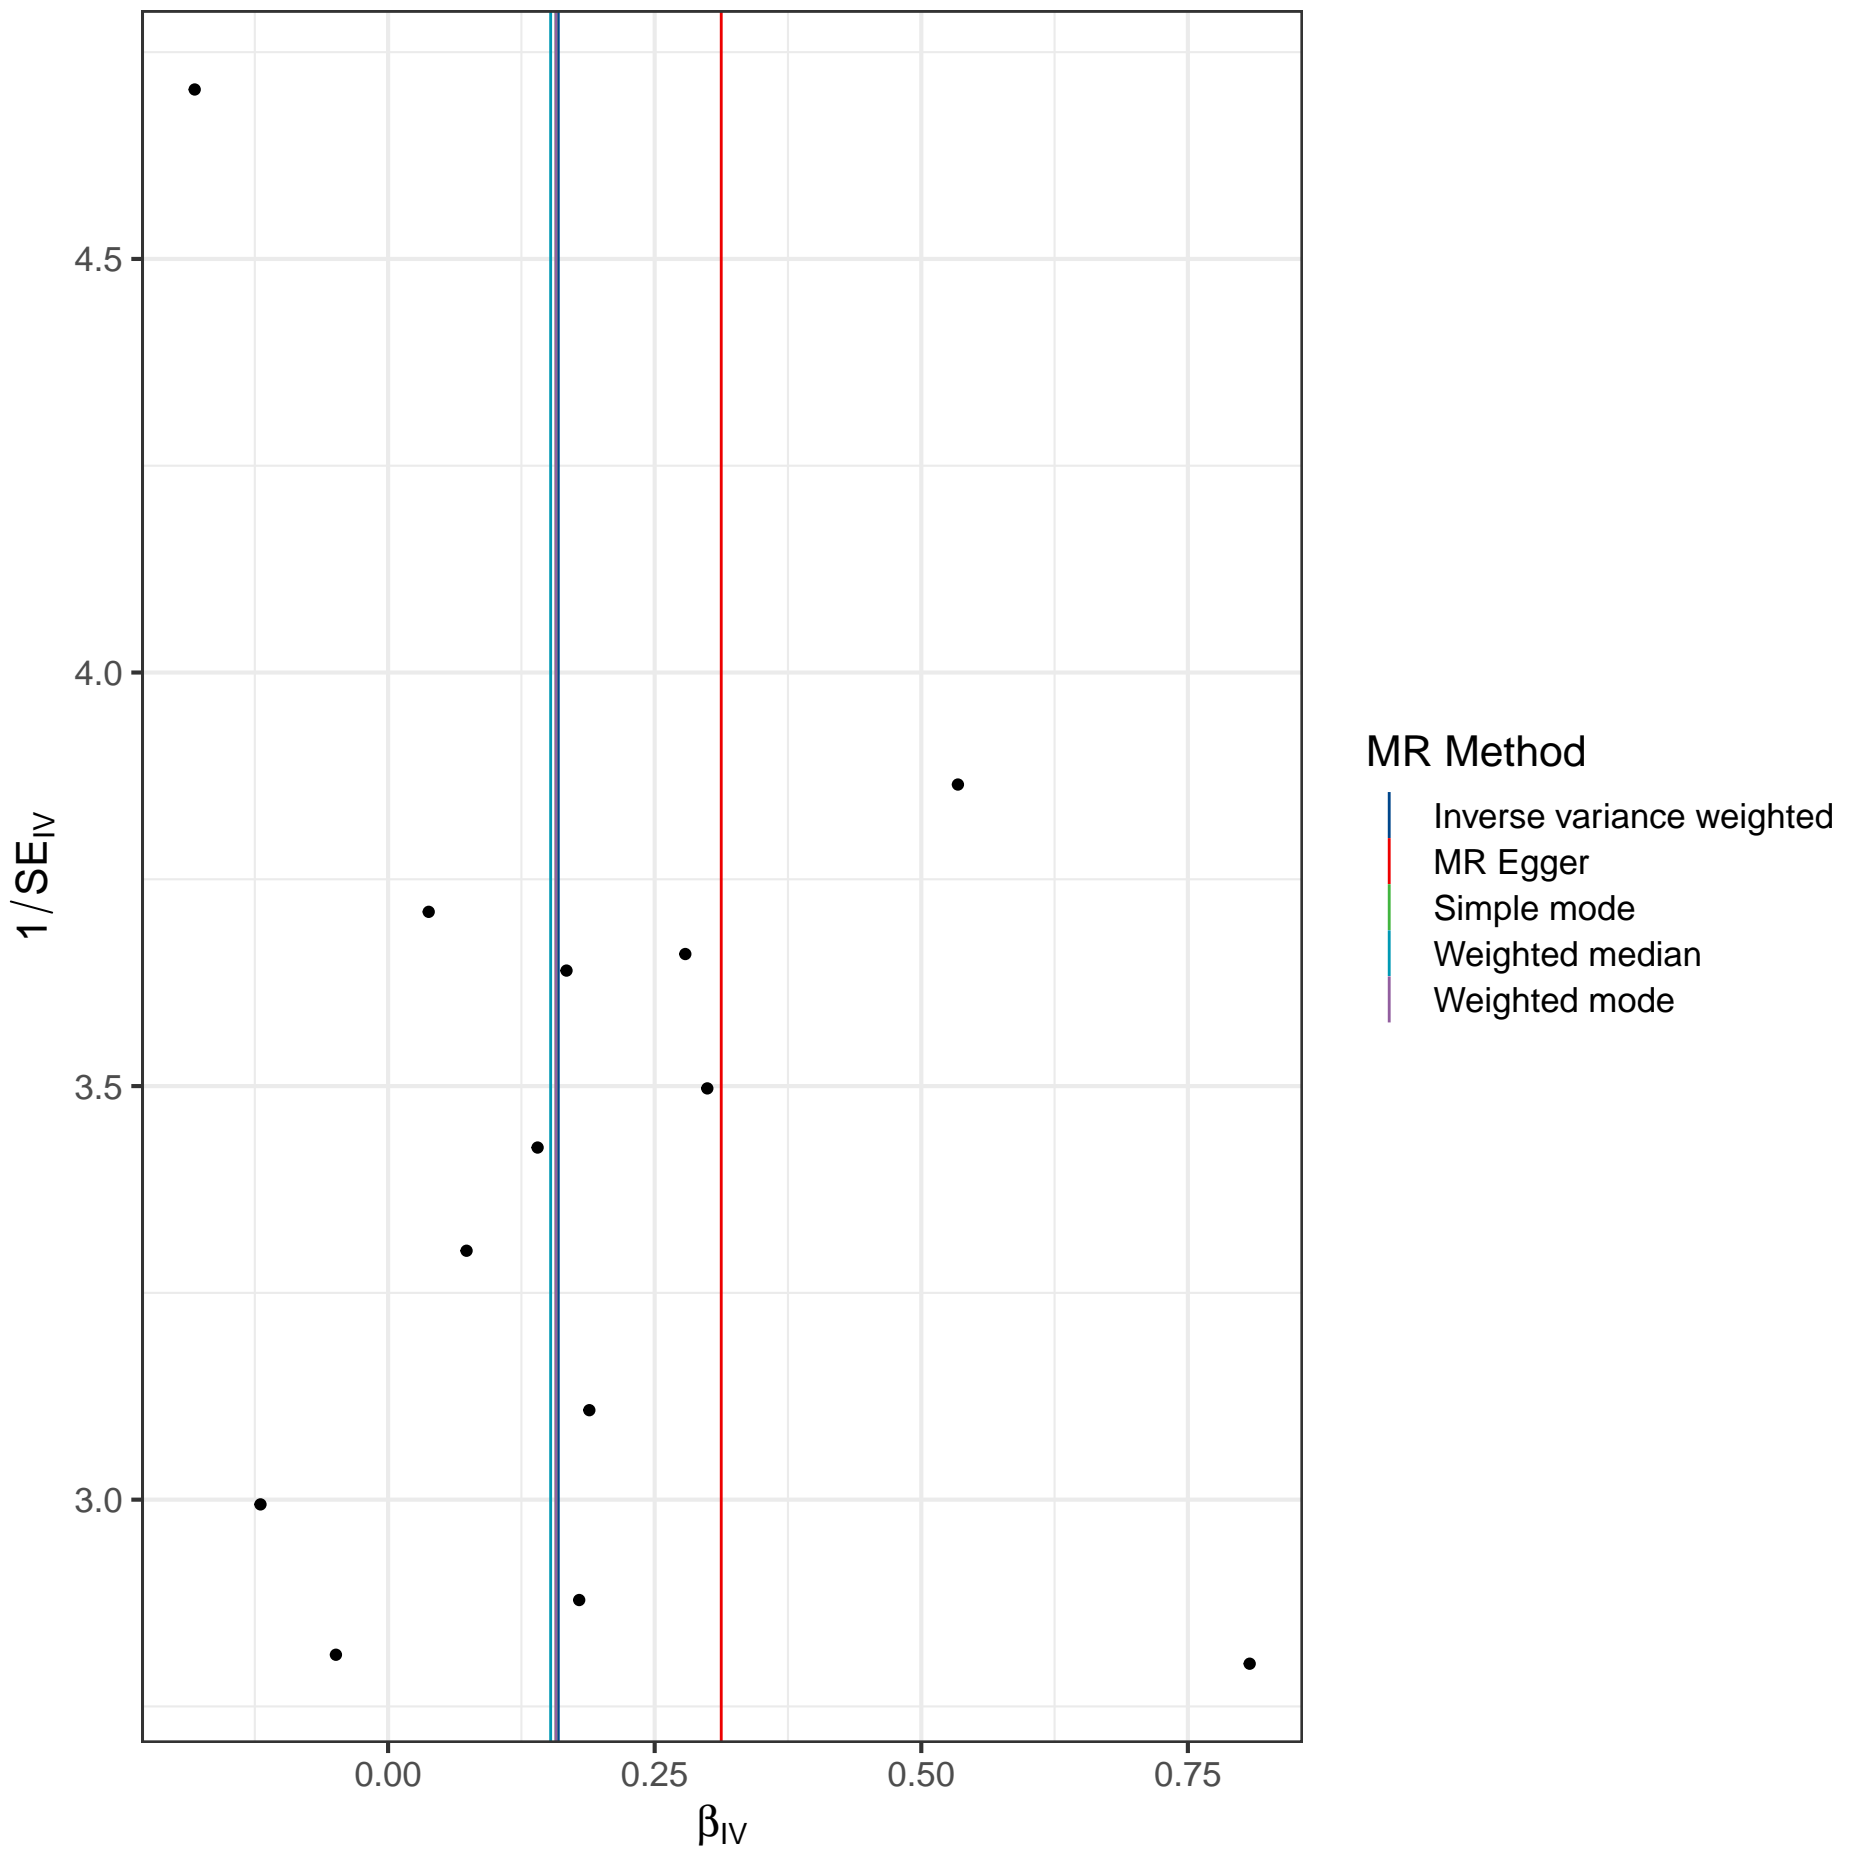

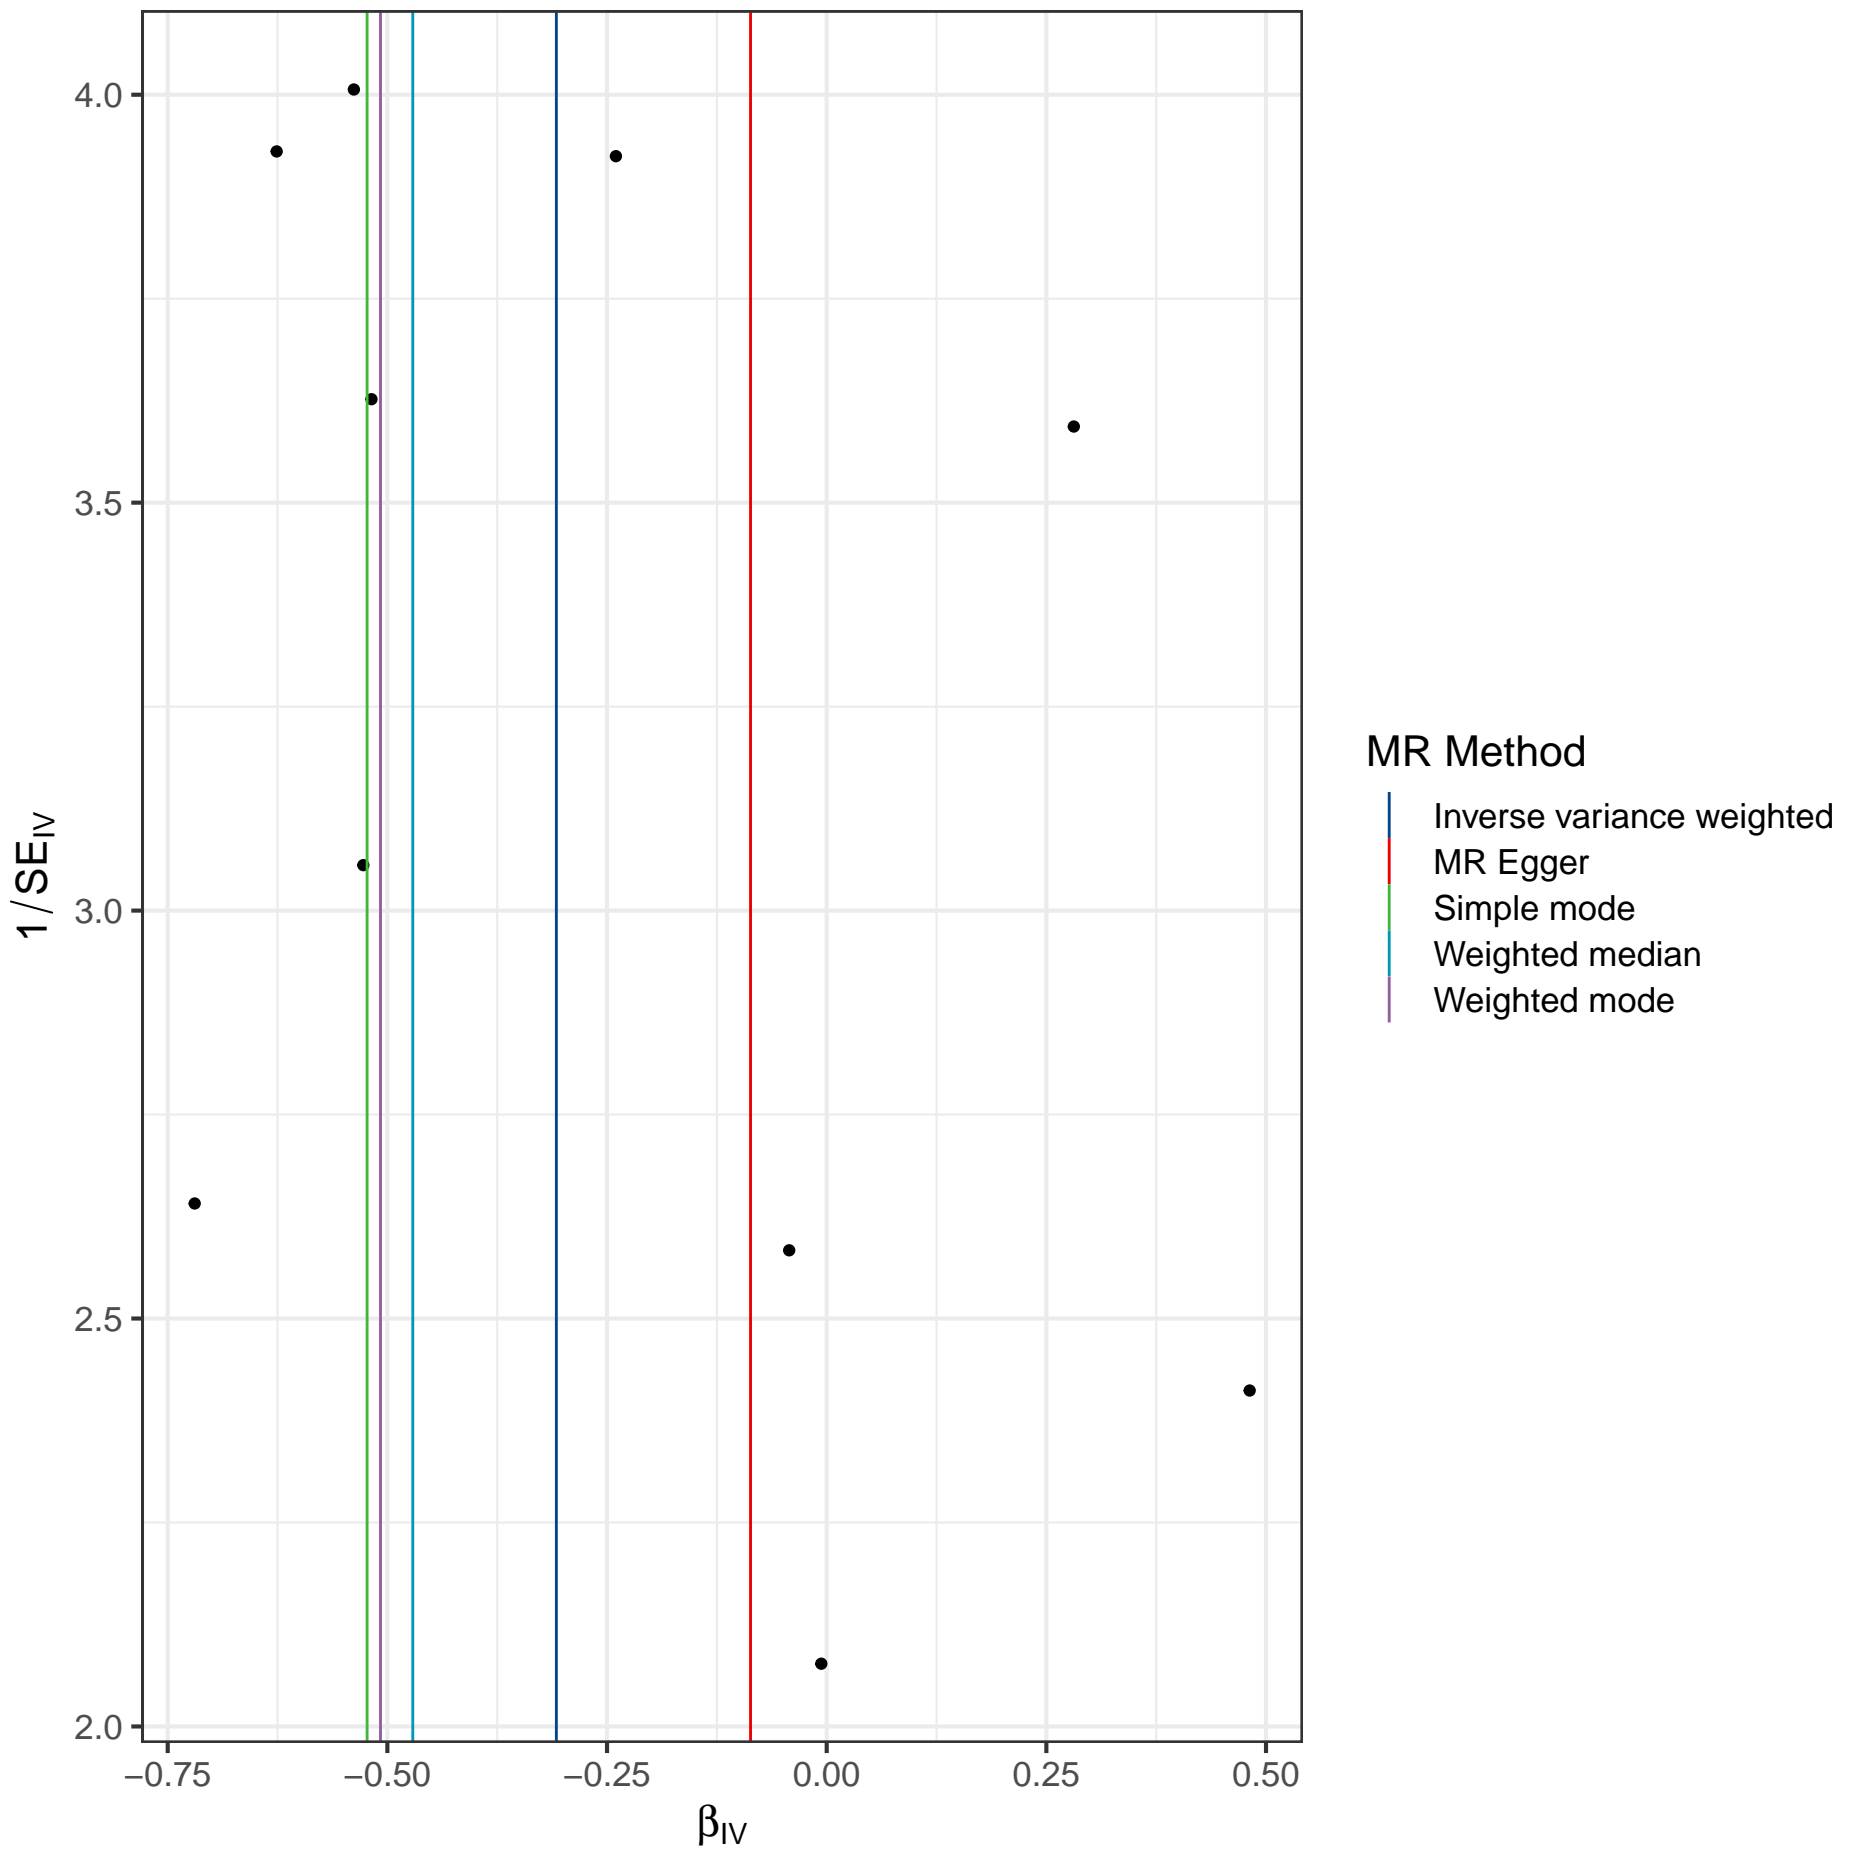



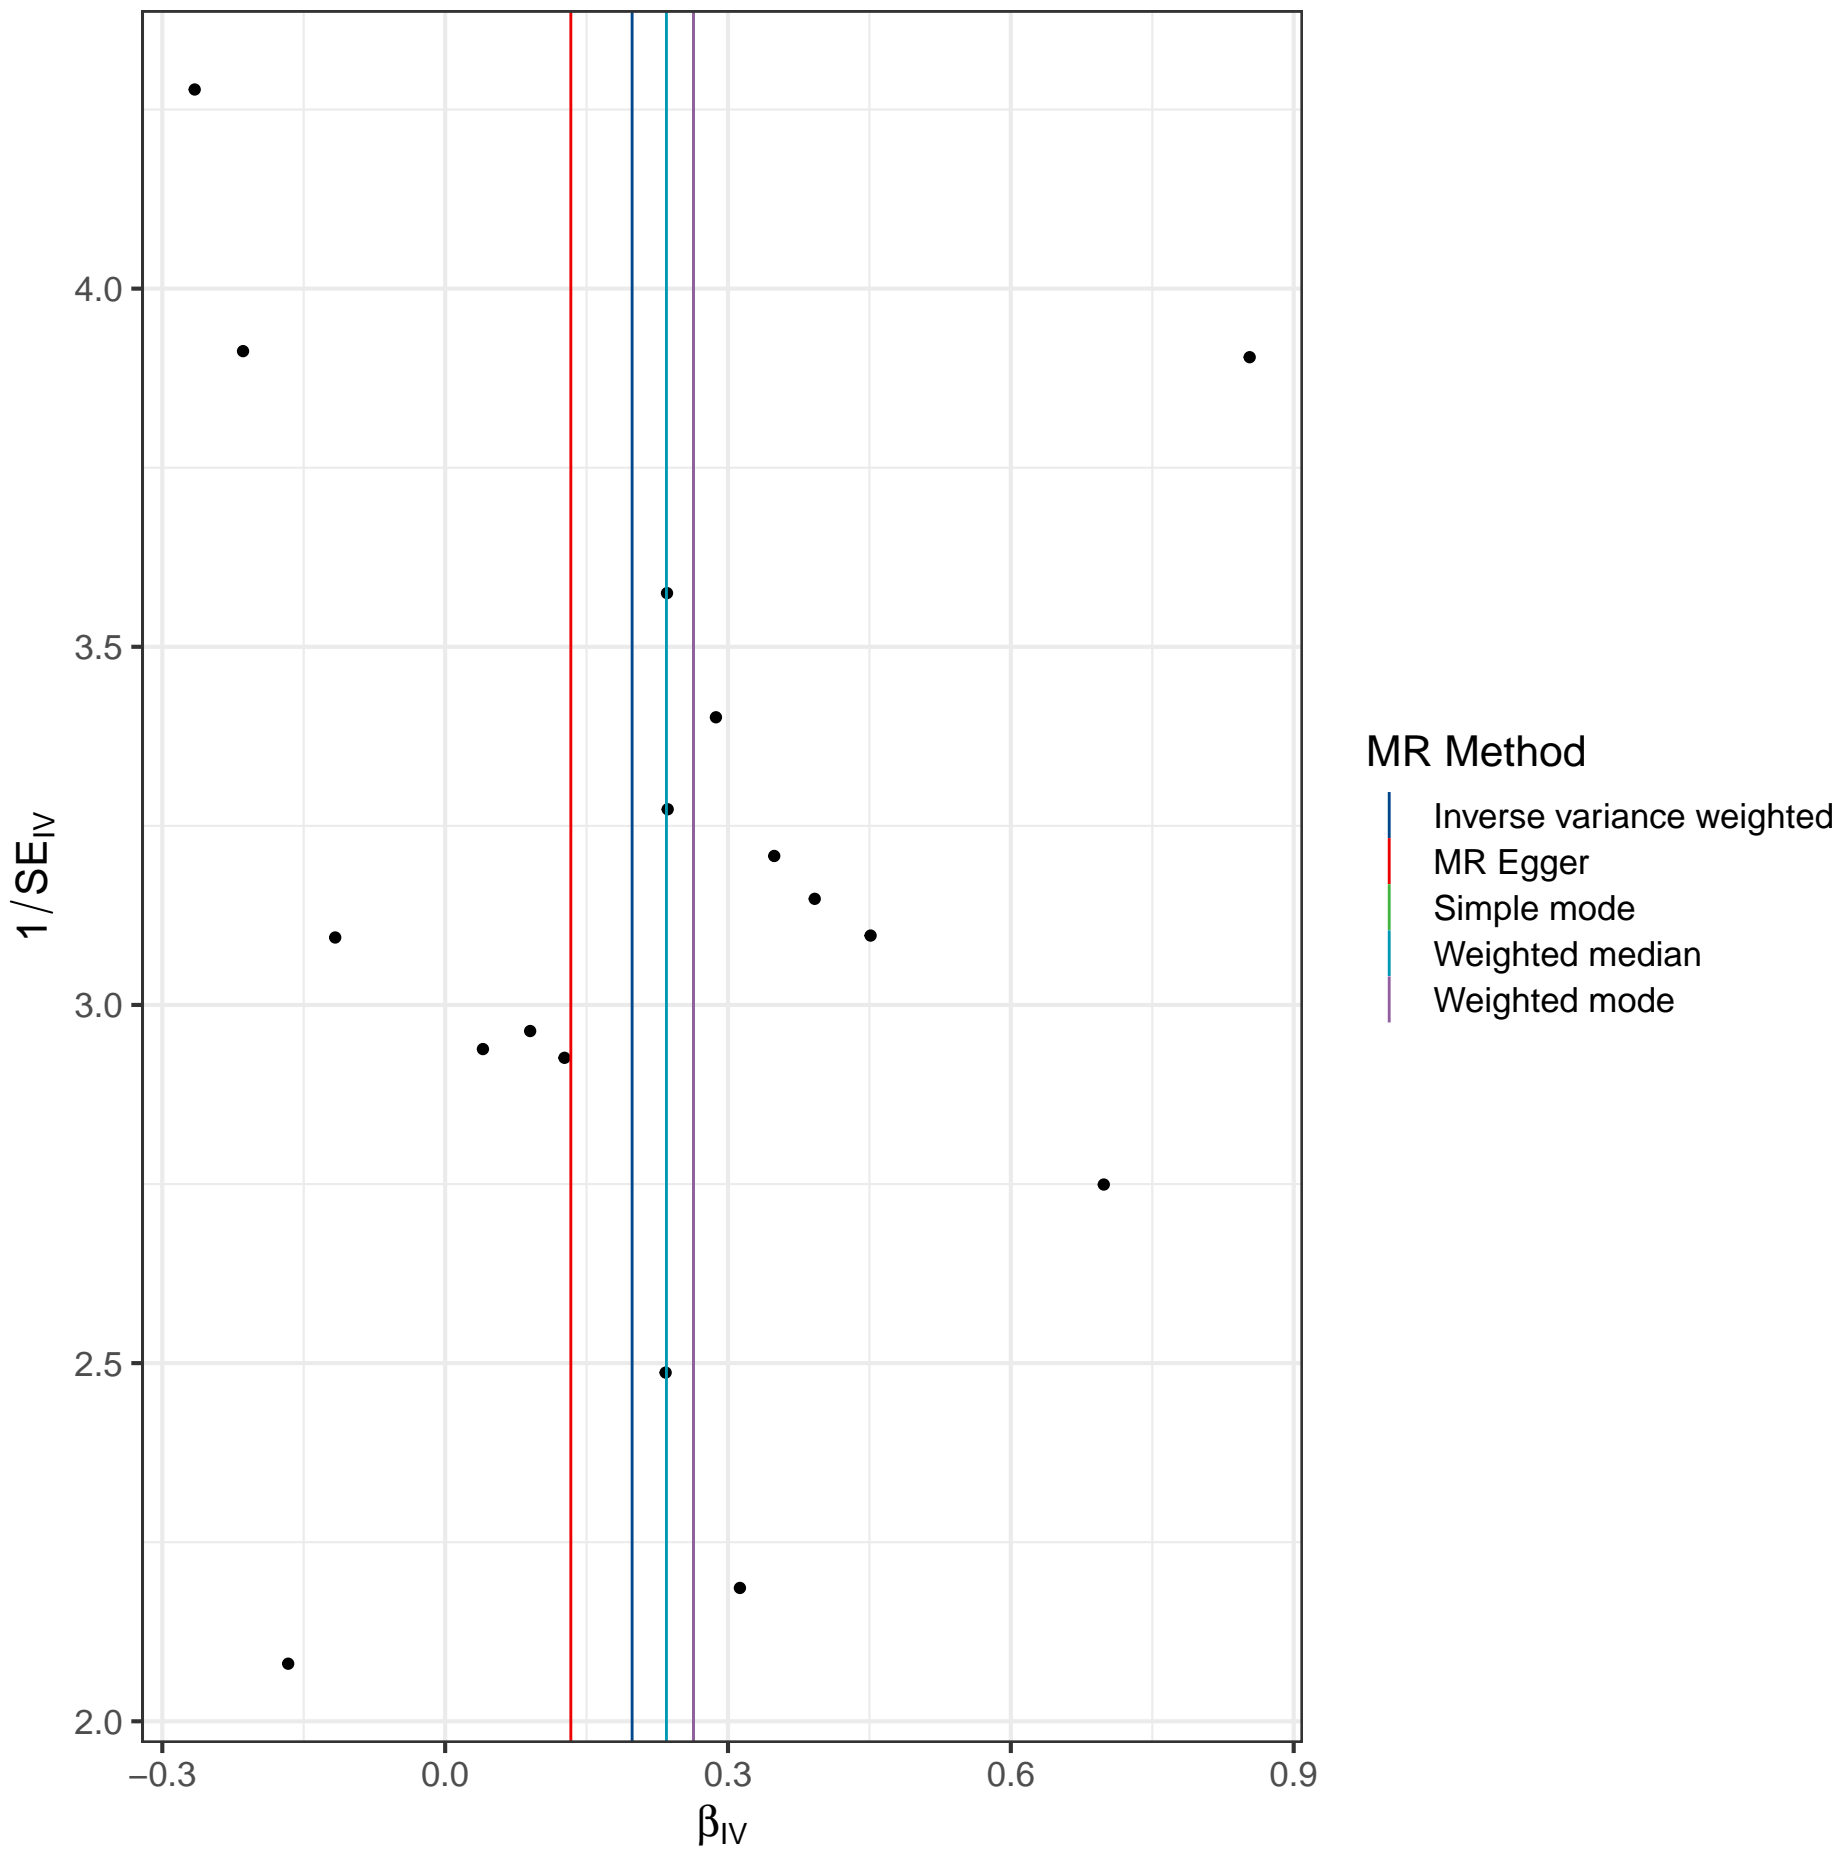

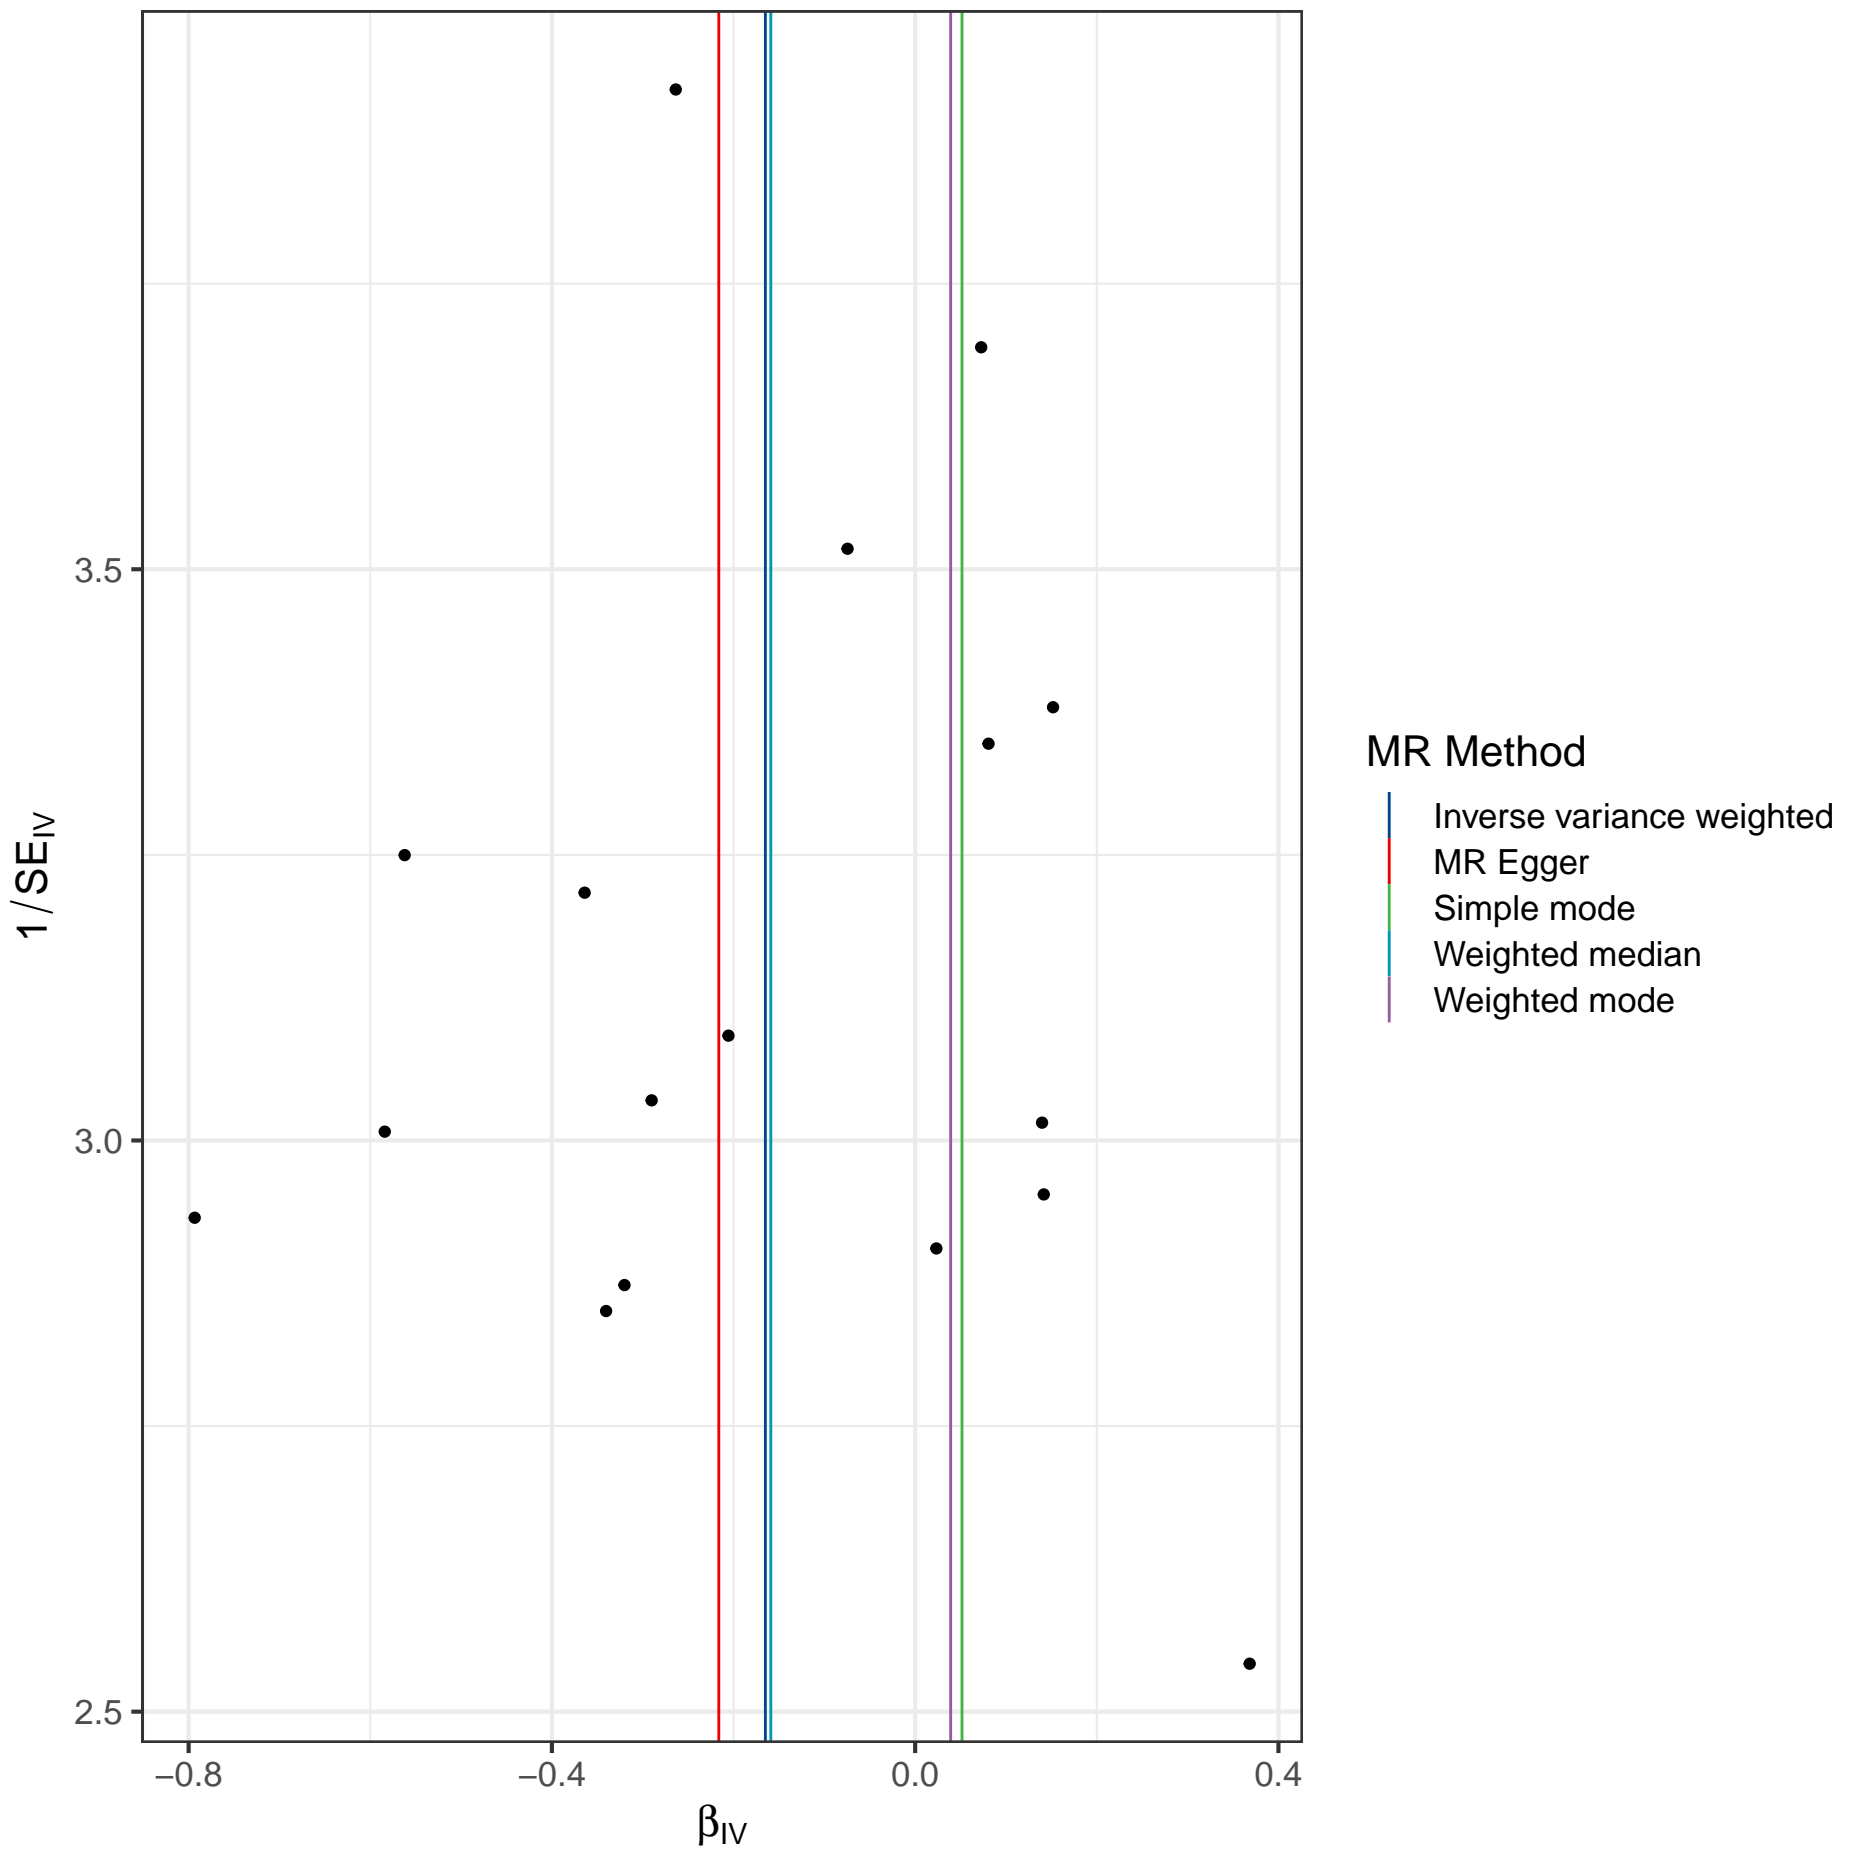

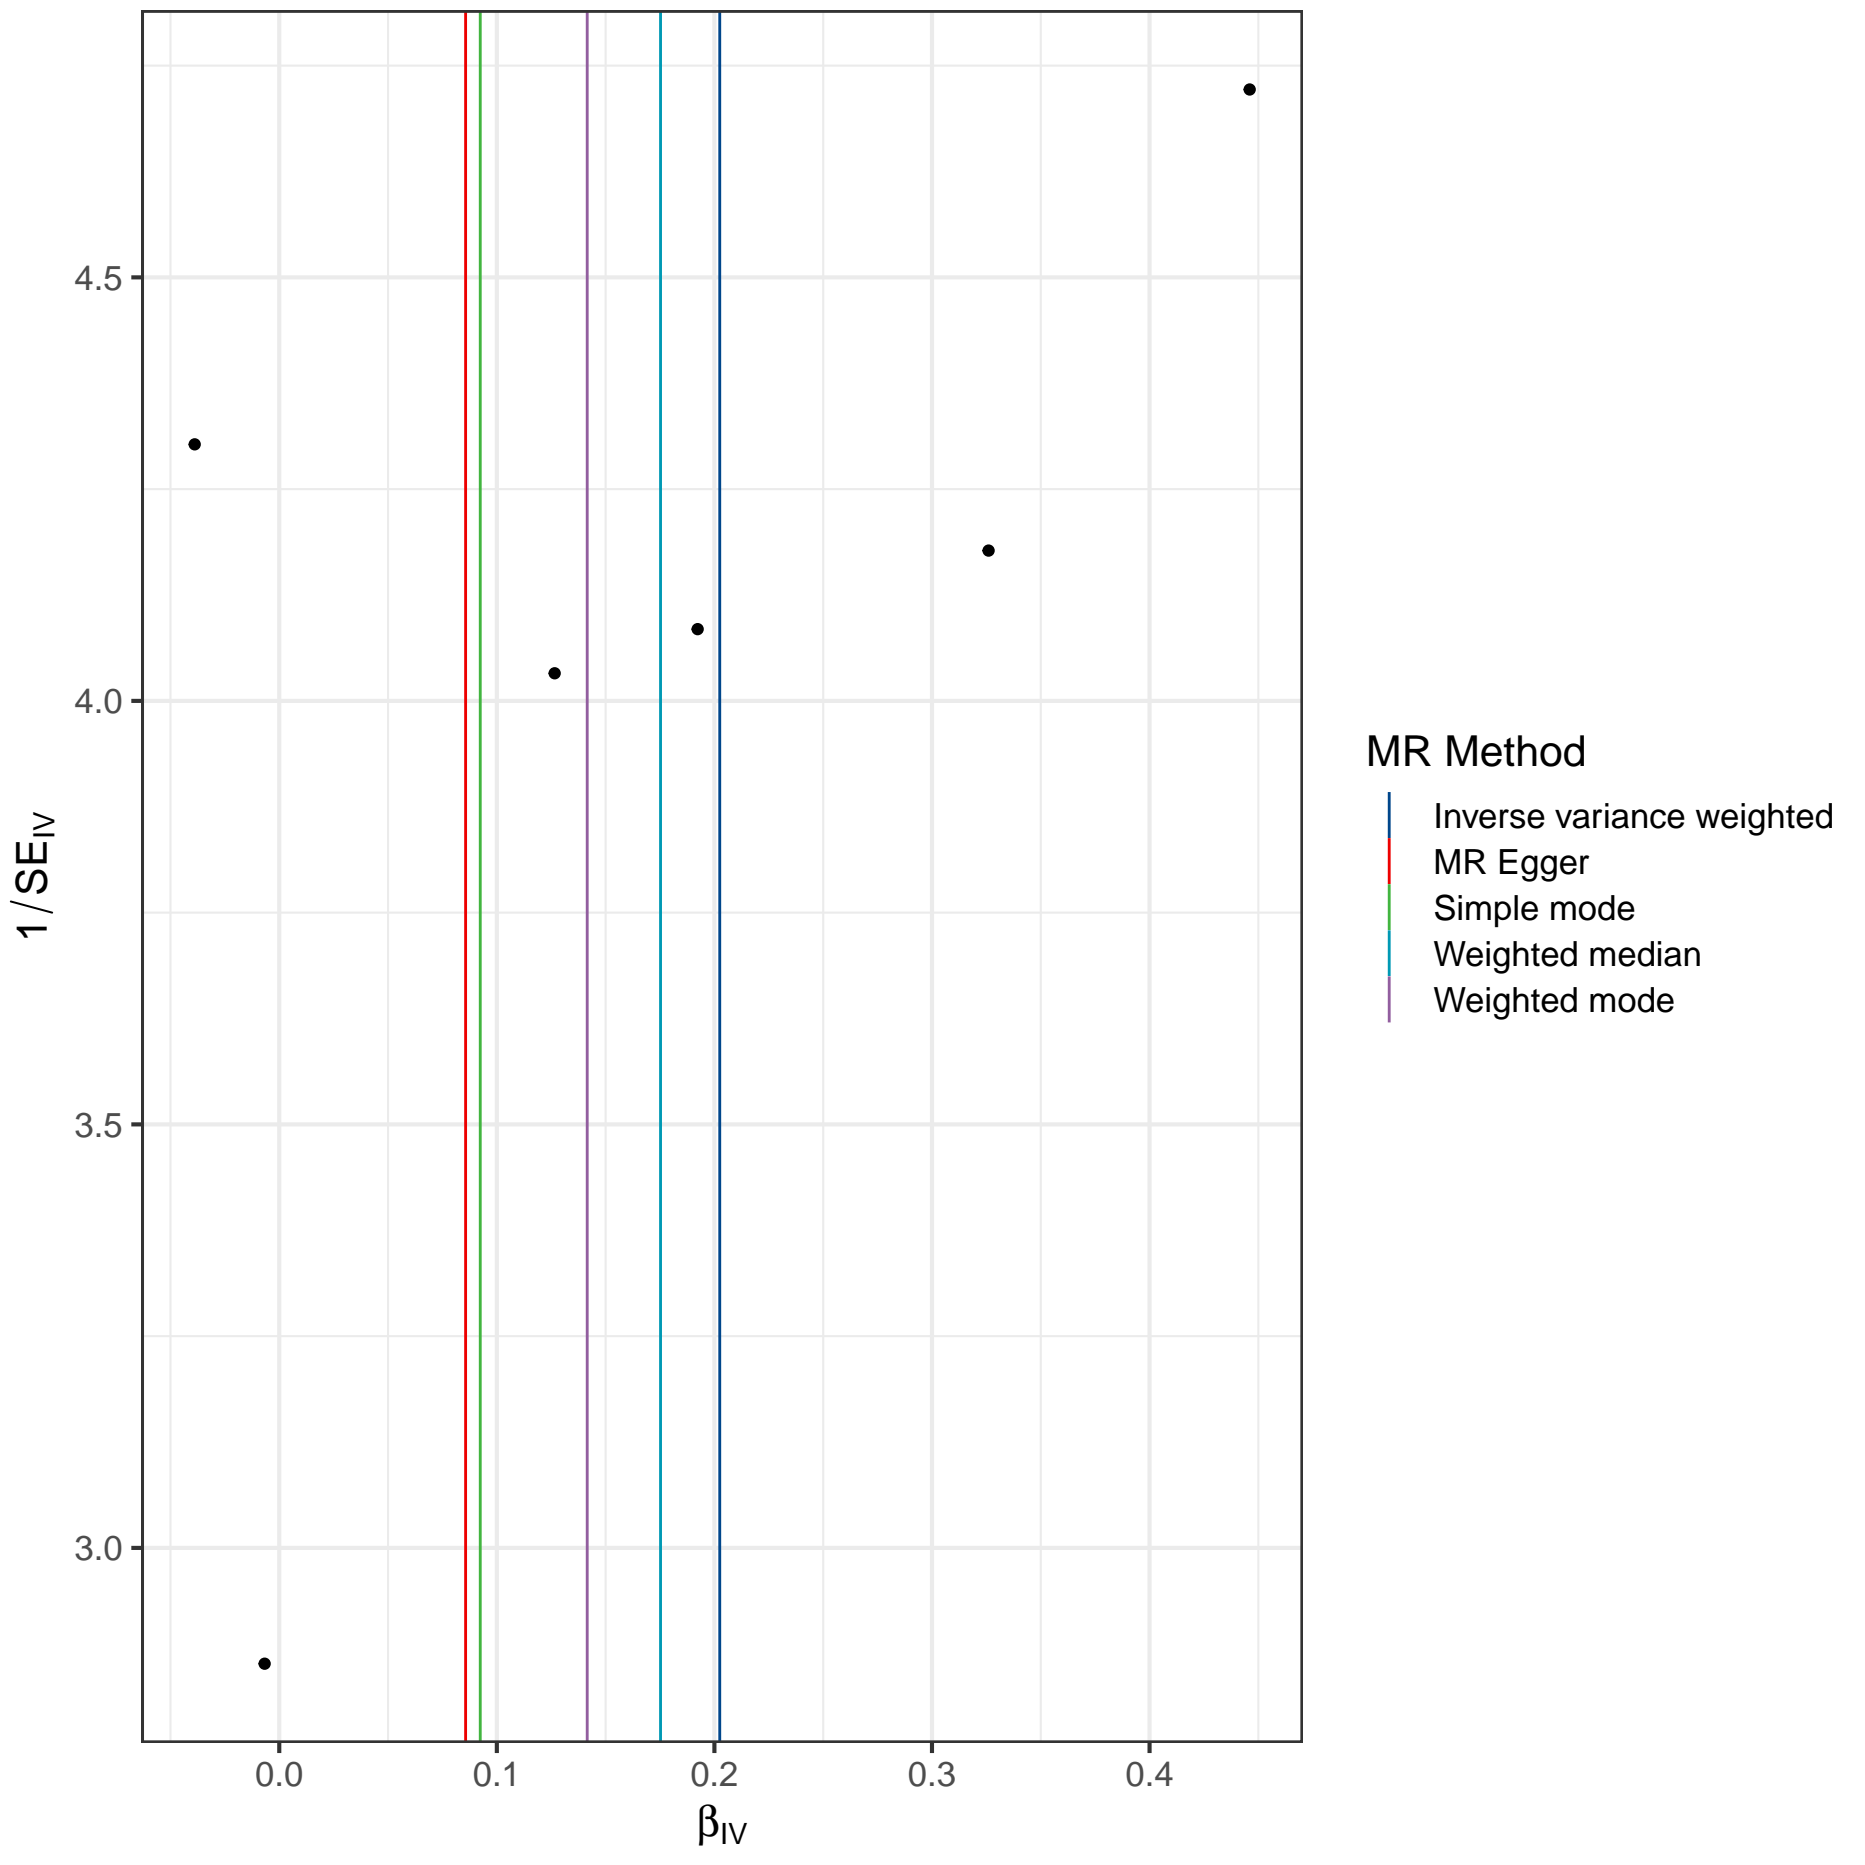

- MR Method
- Inverse variance weighted
  - MR Egger
  - Simple mode
  - Weighted median
  - Weighted mode

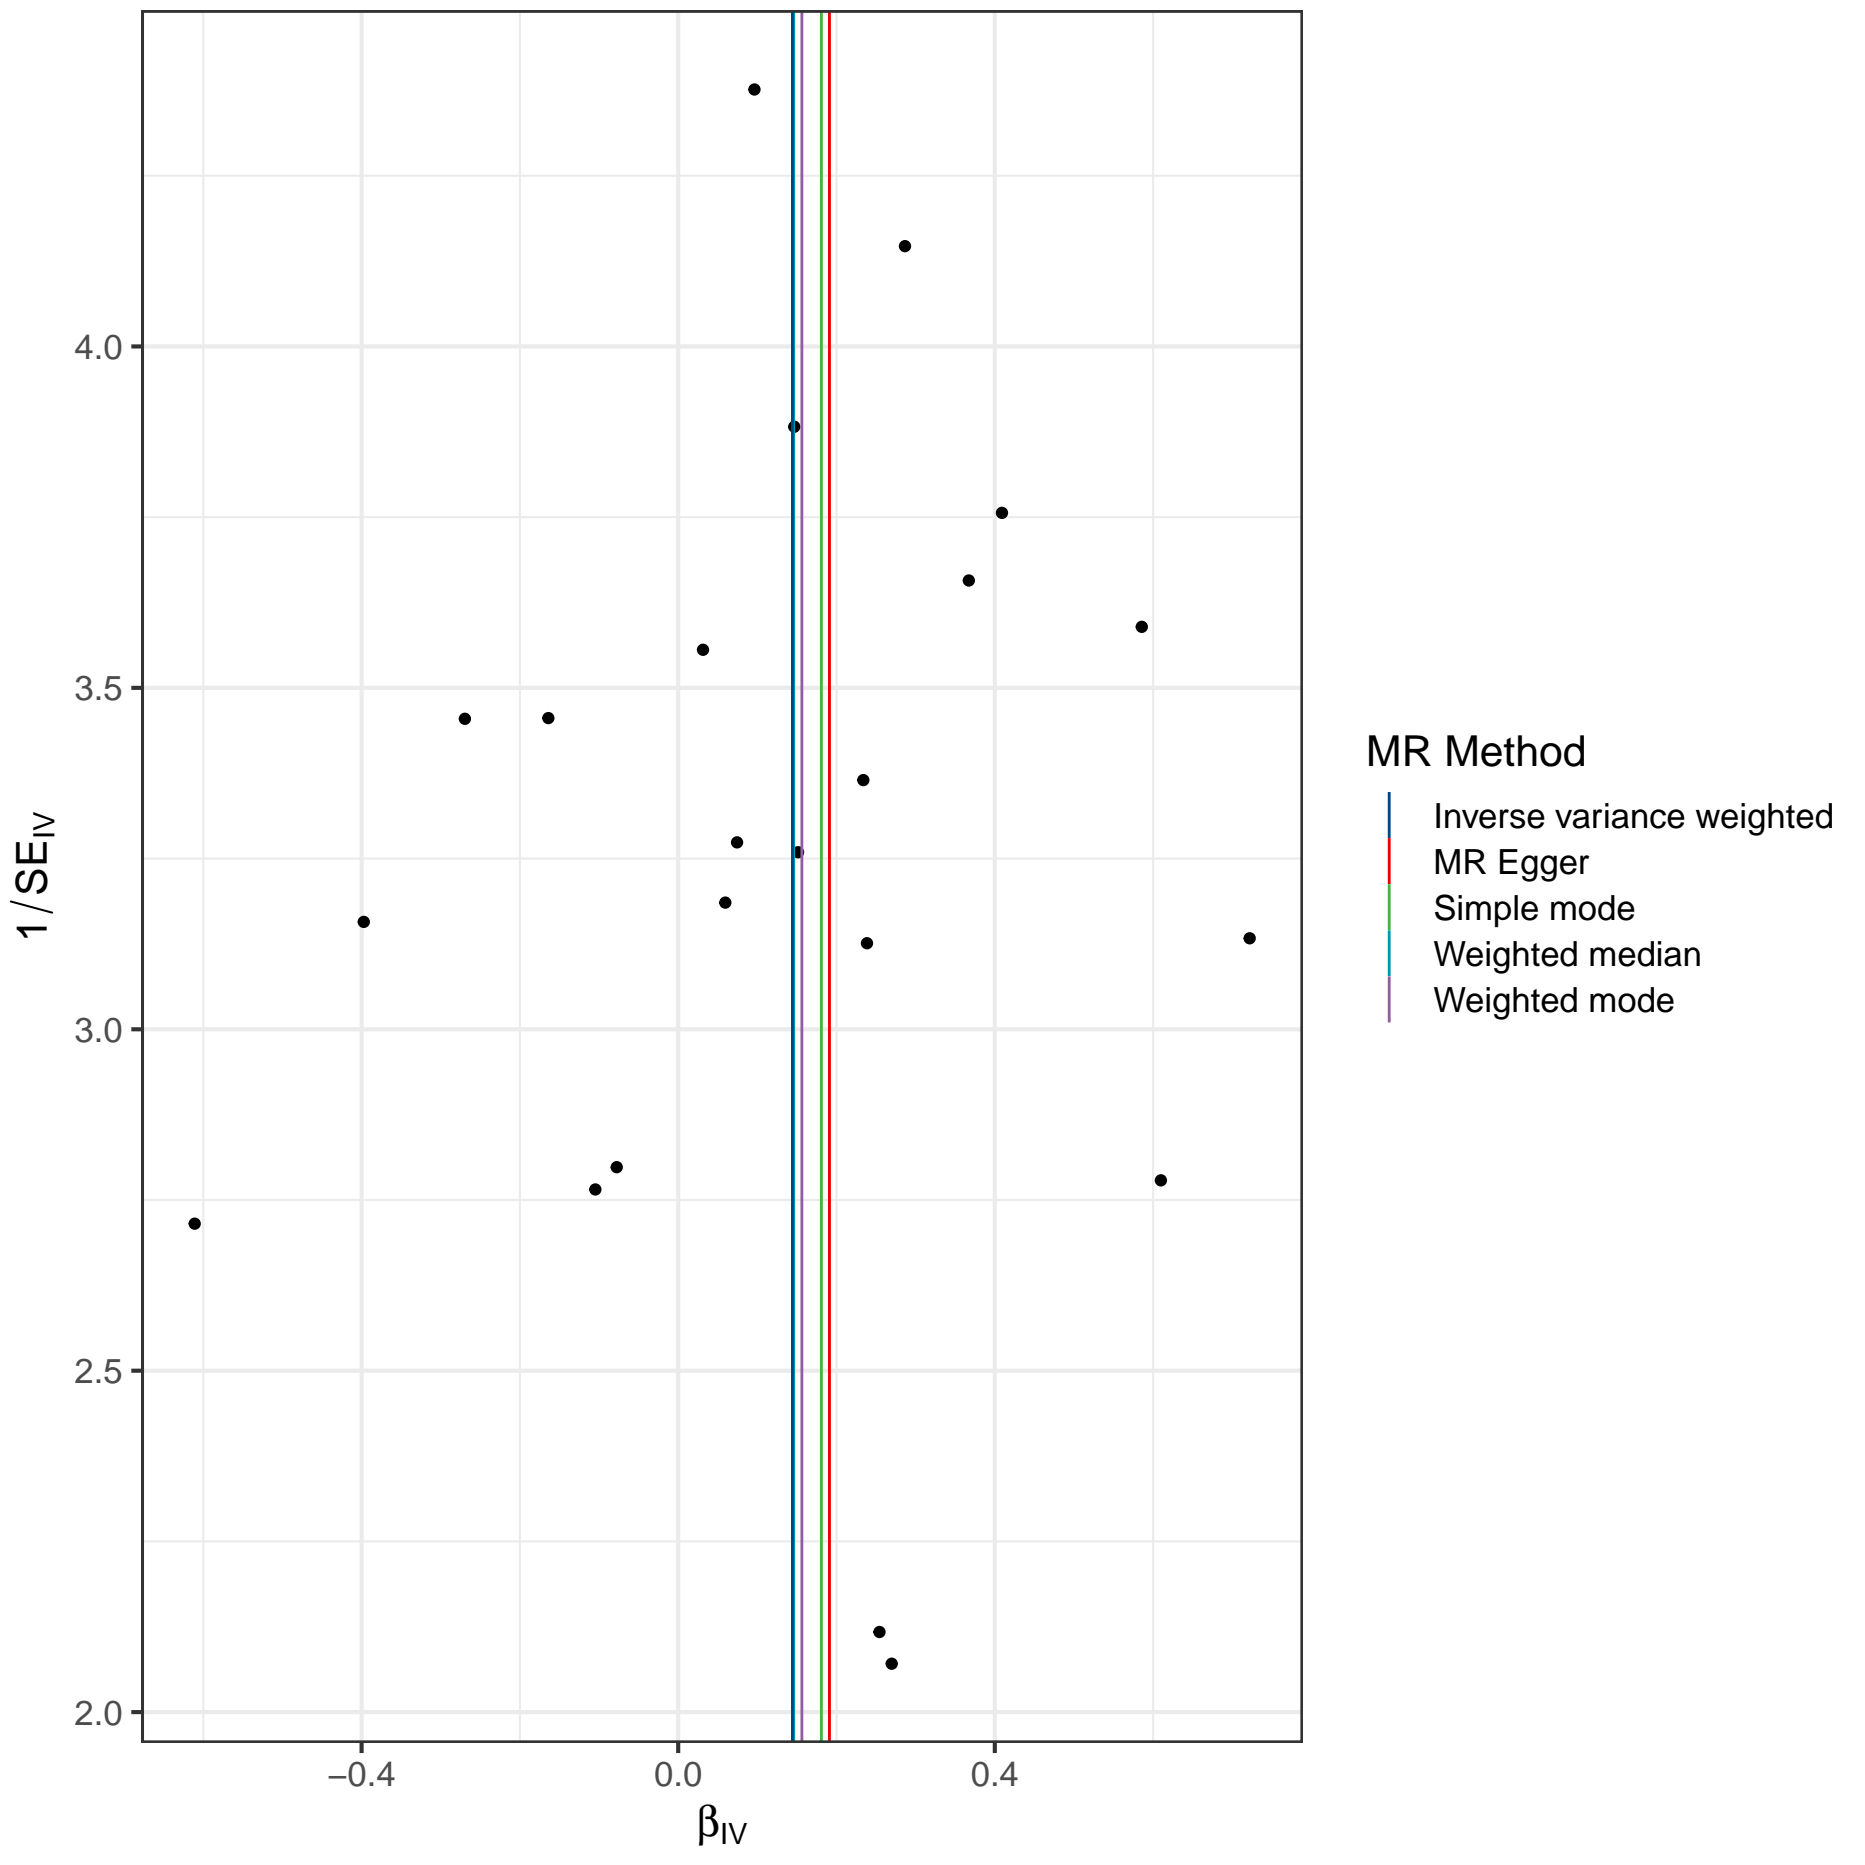

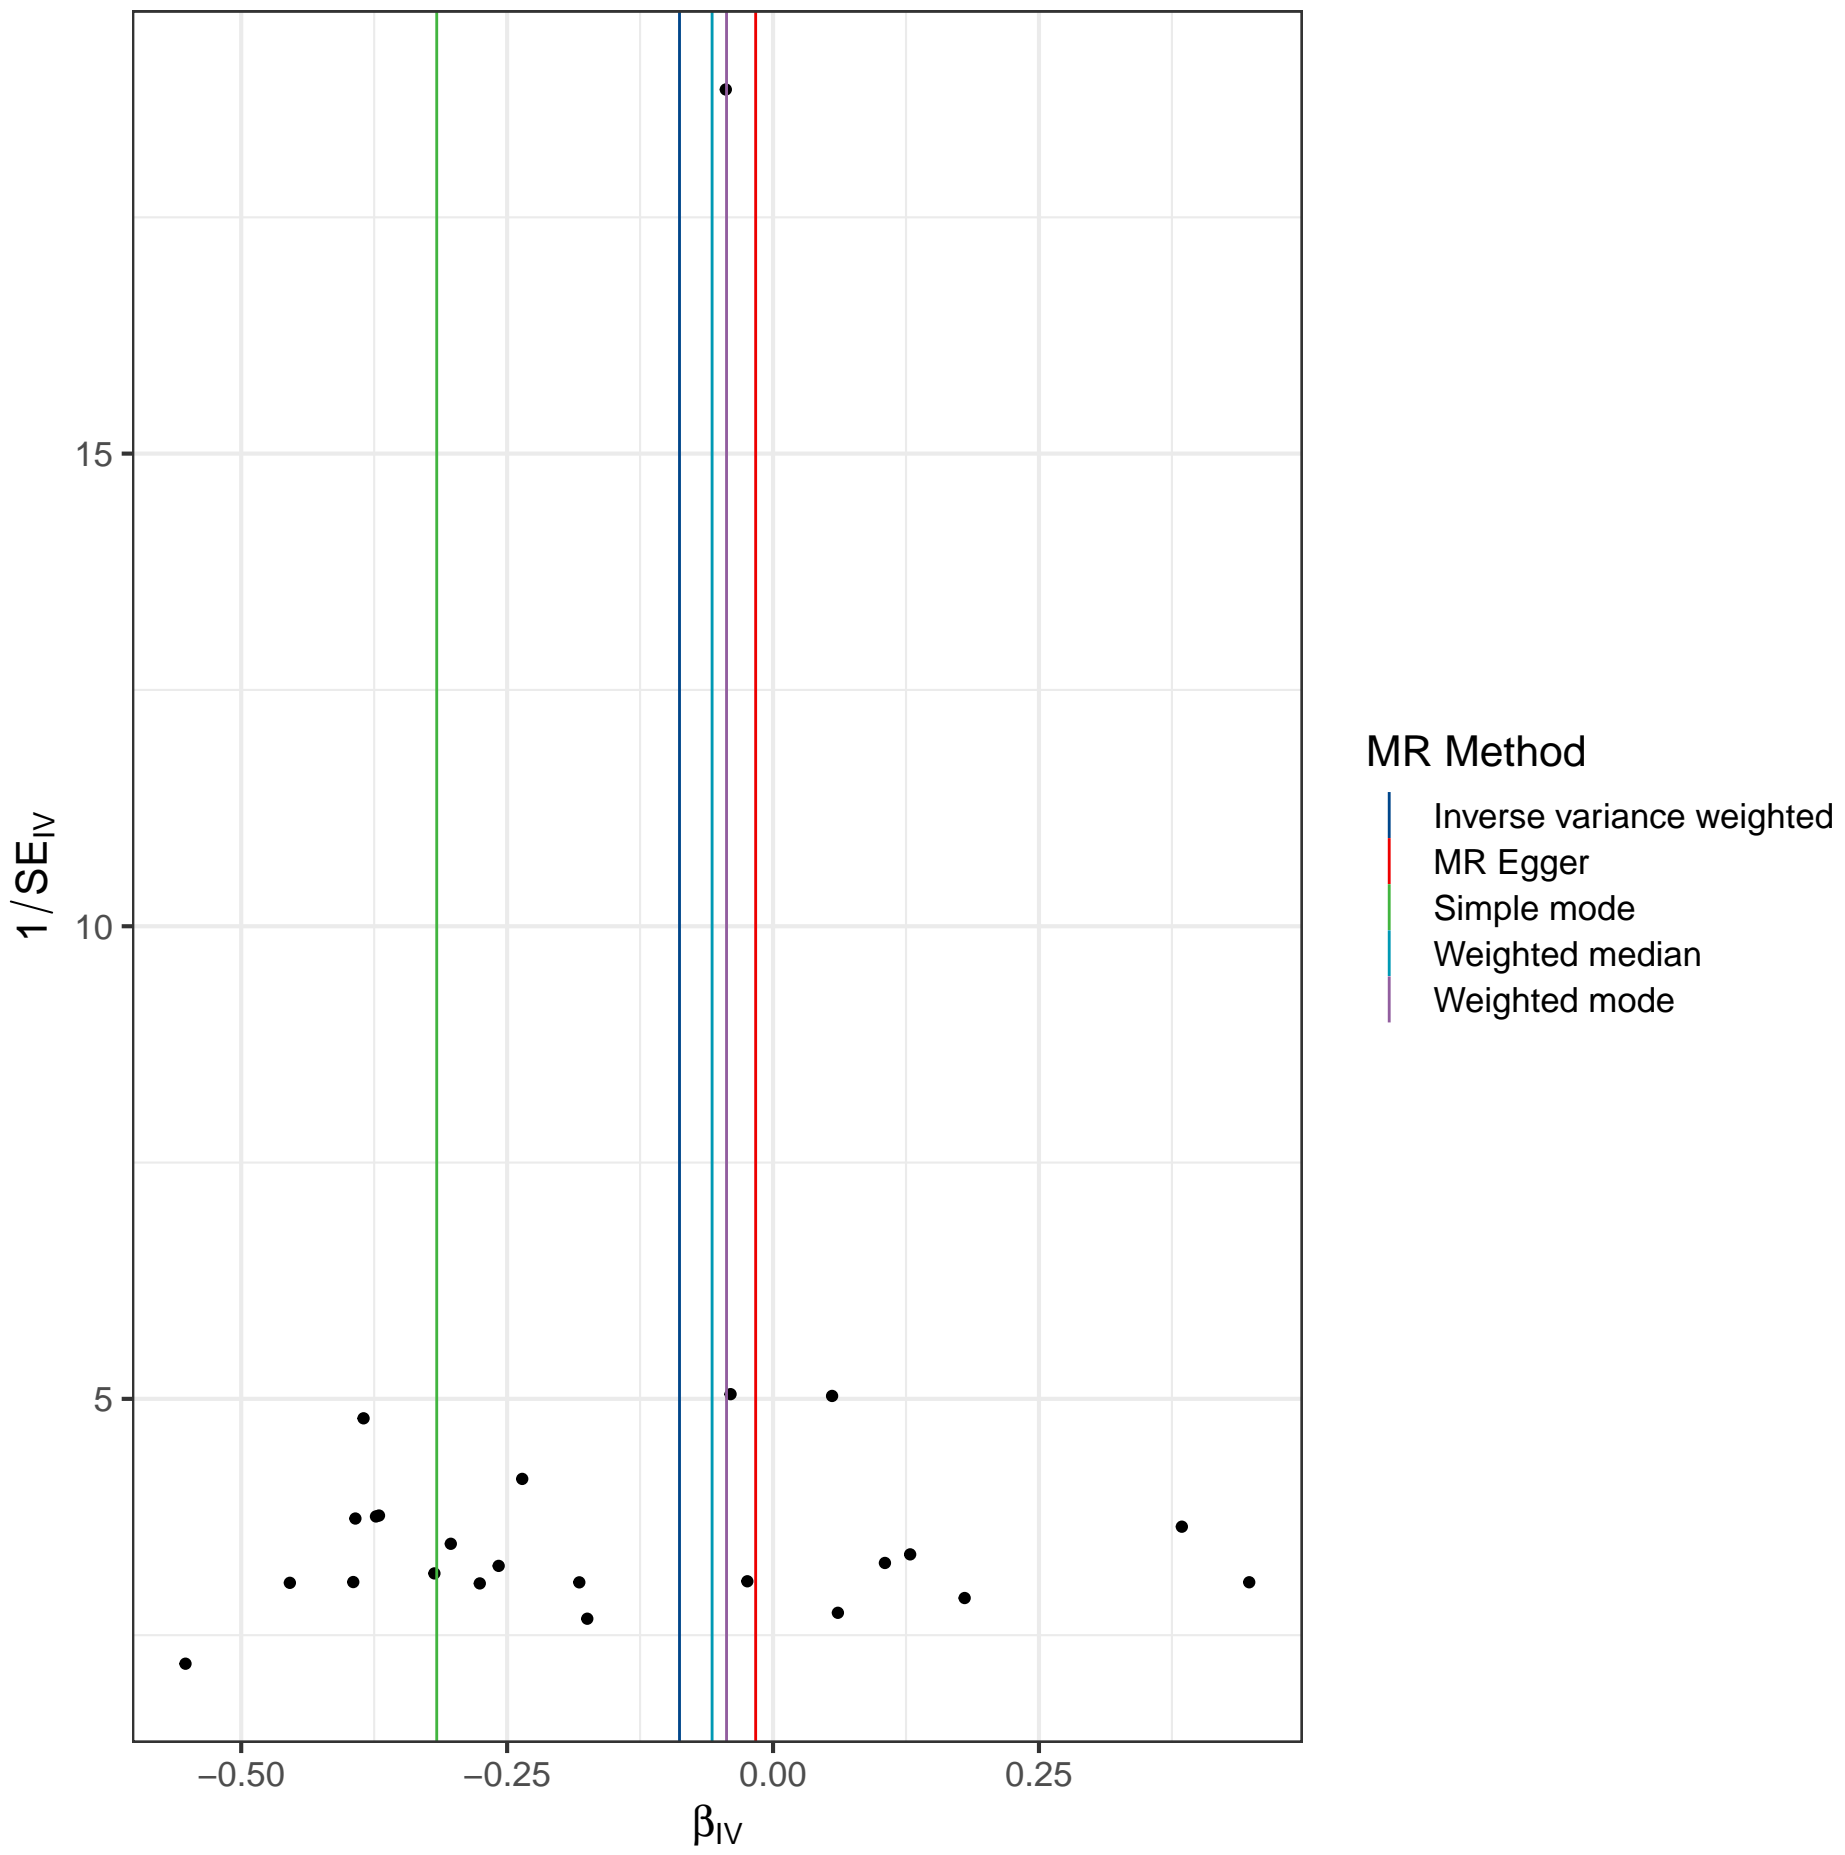

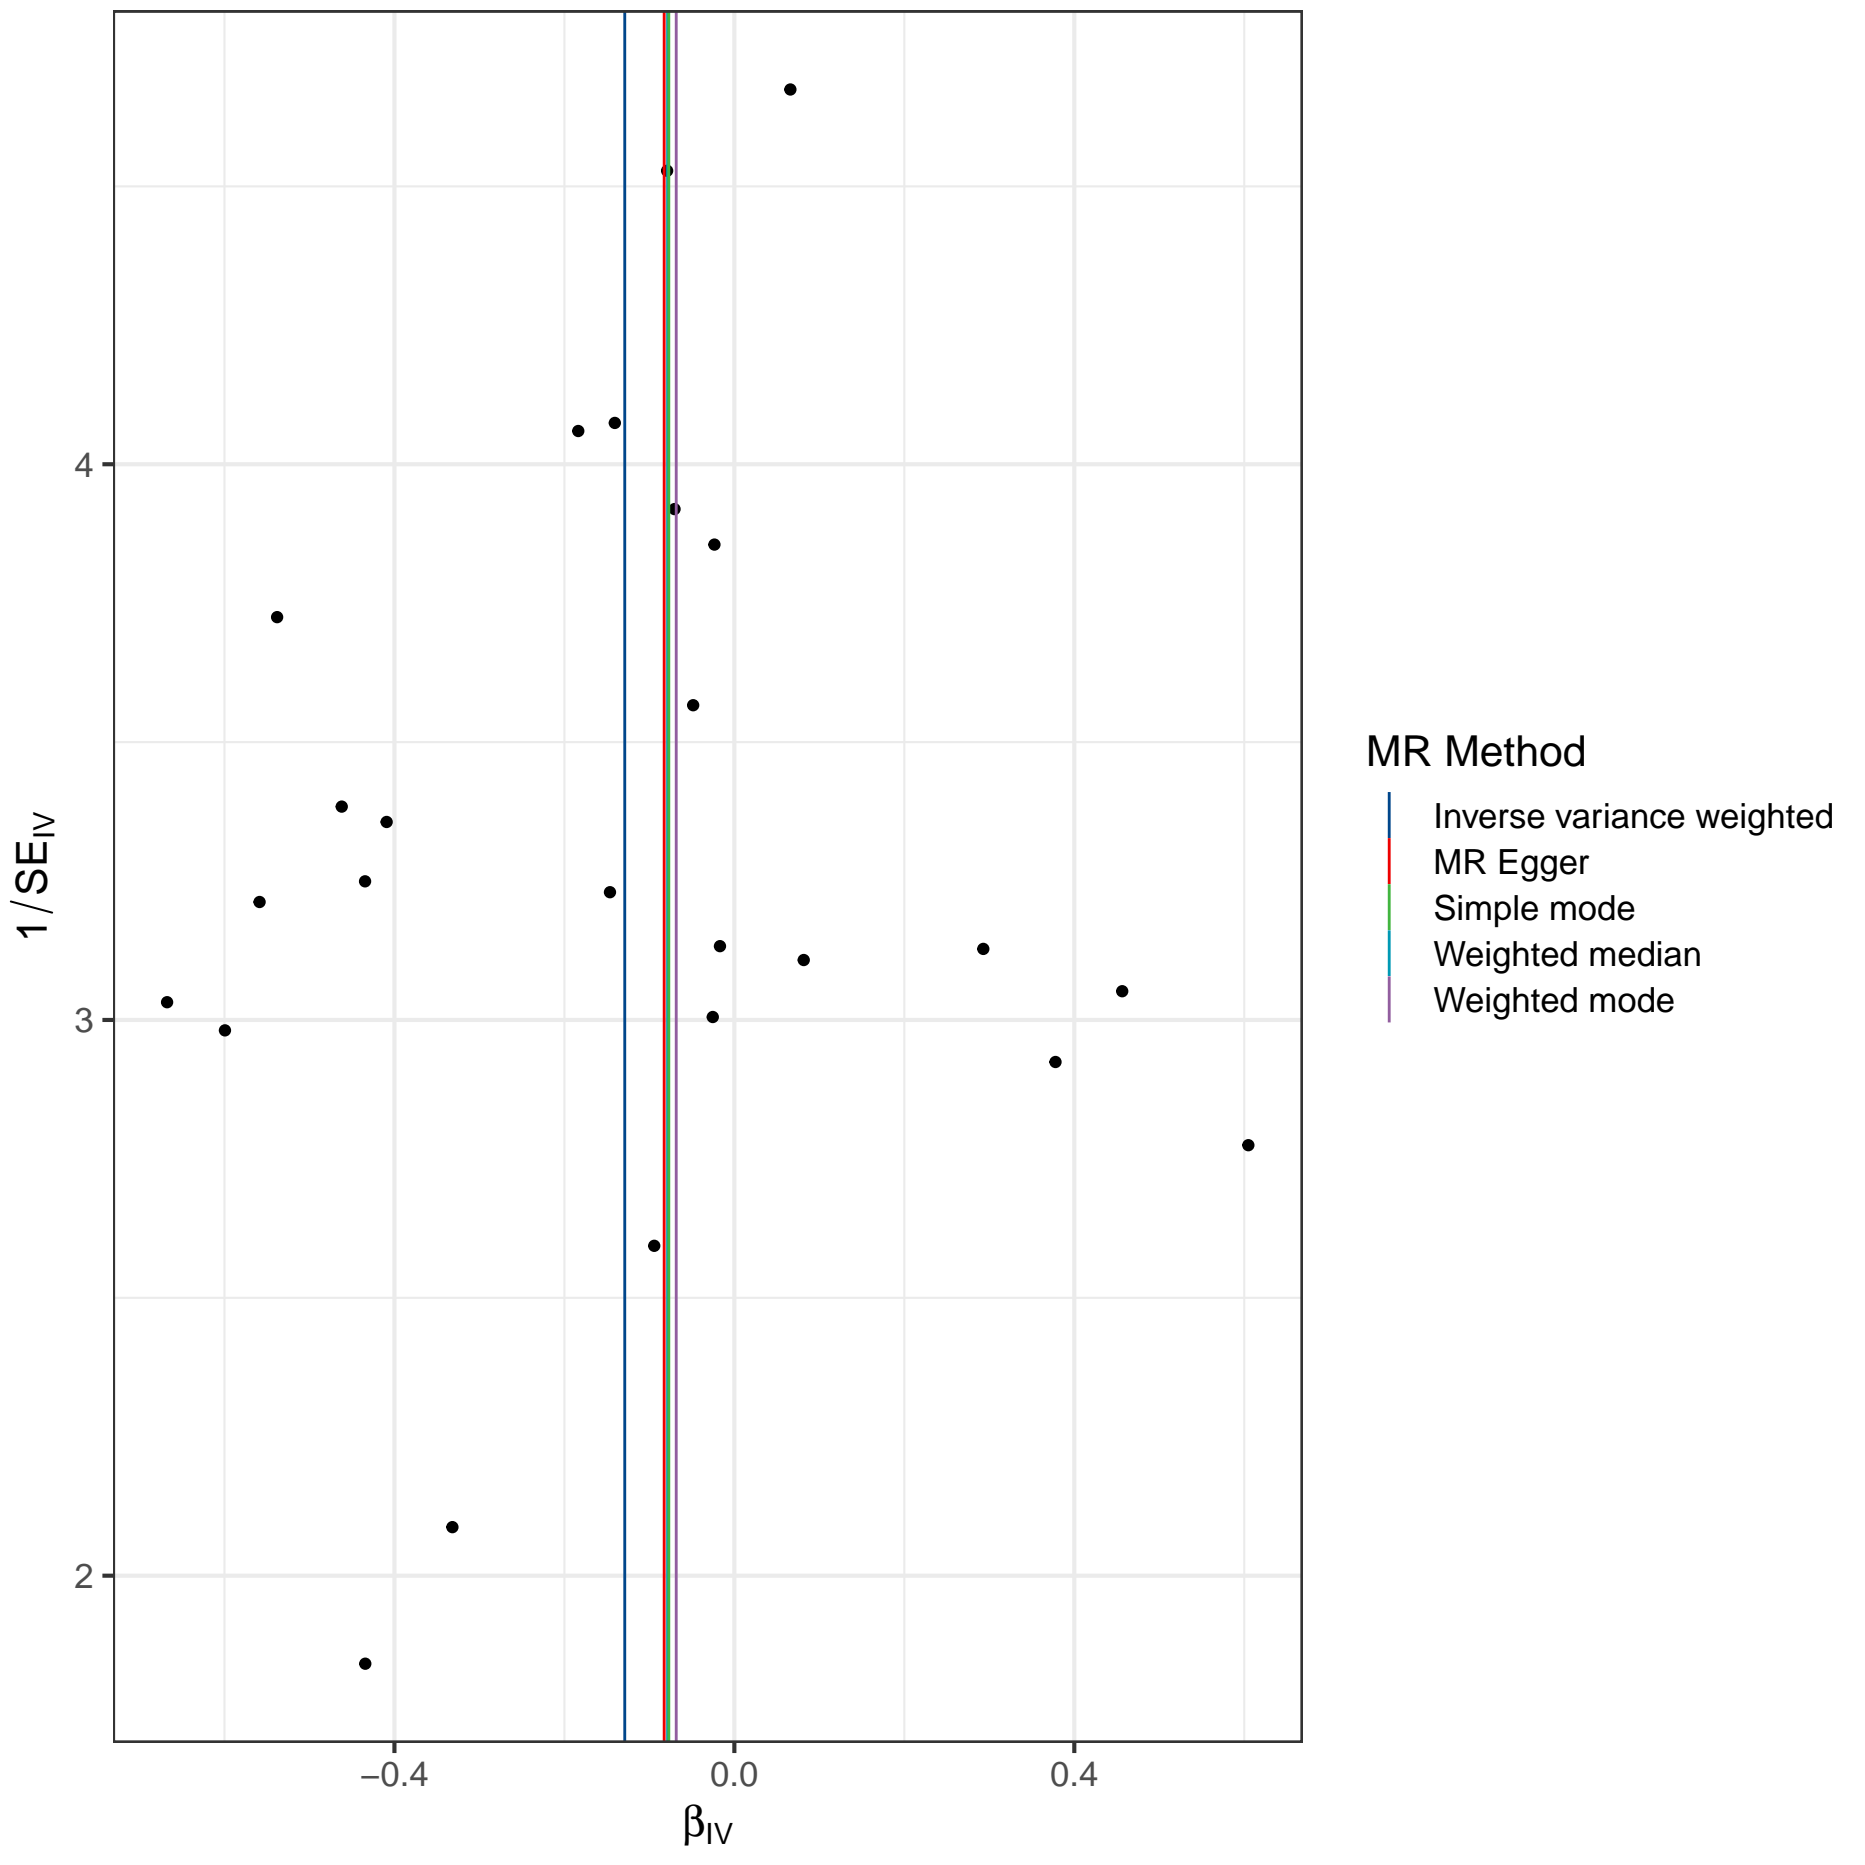

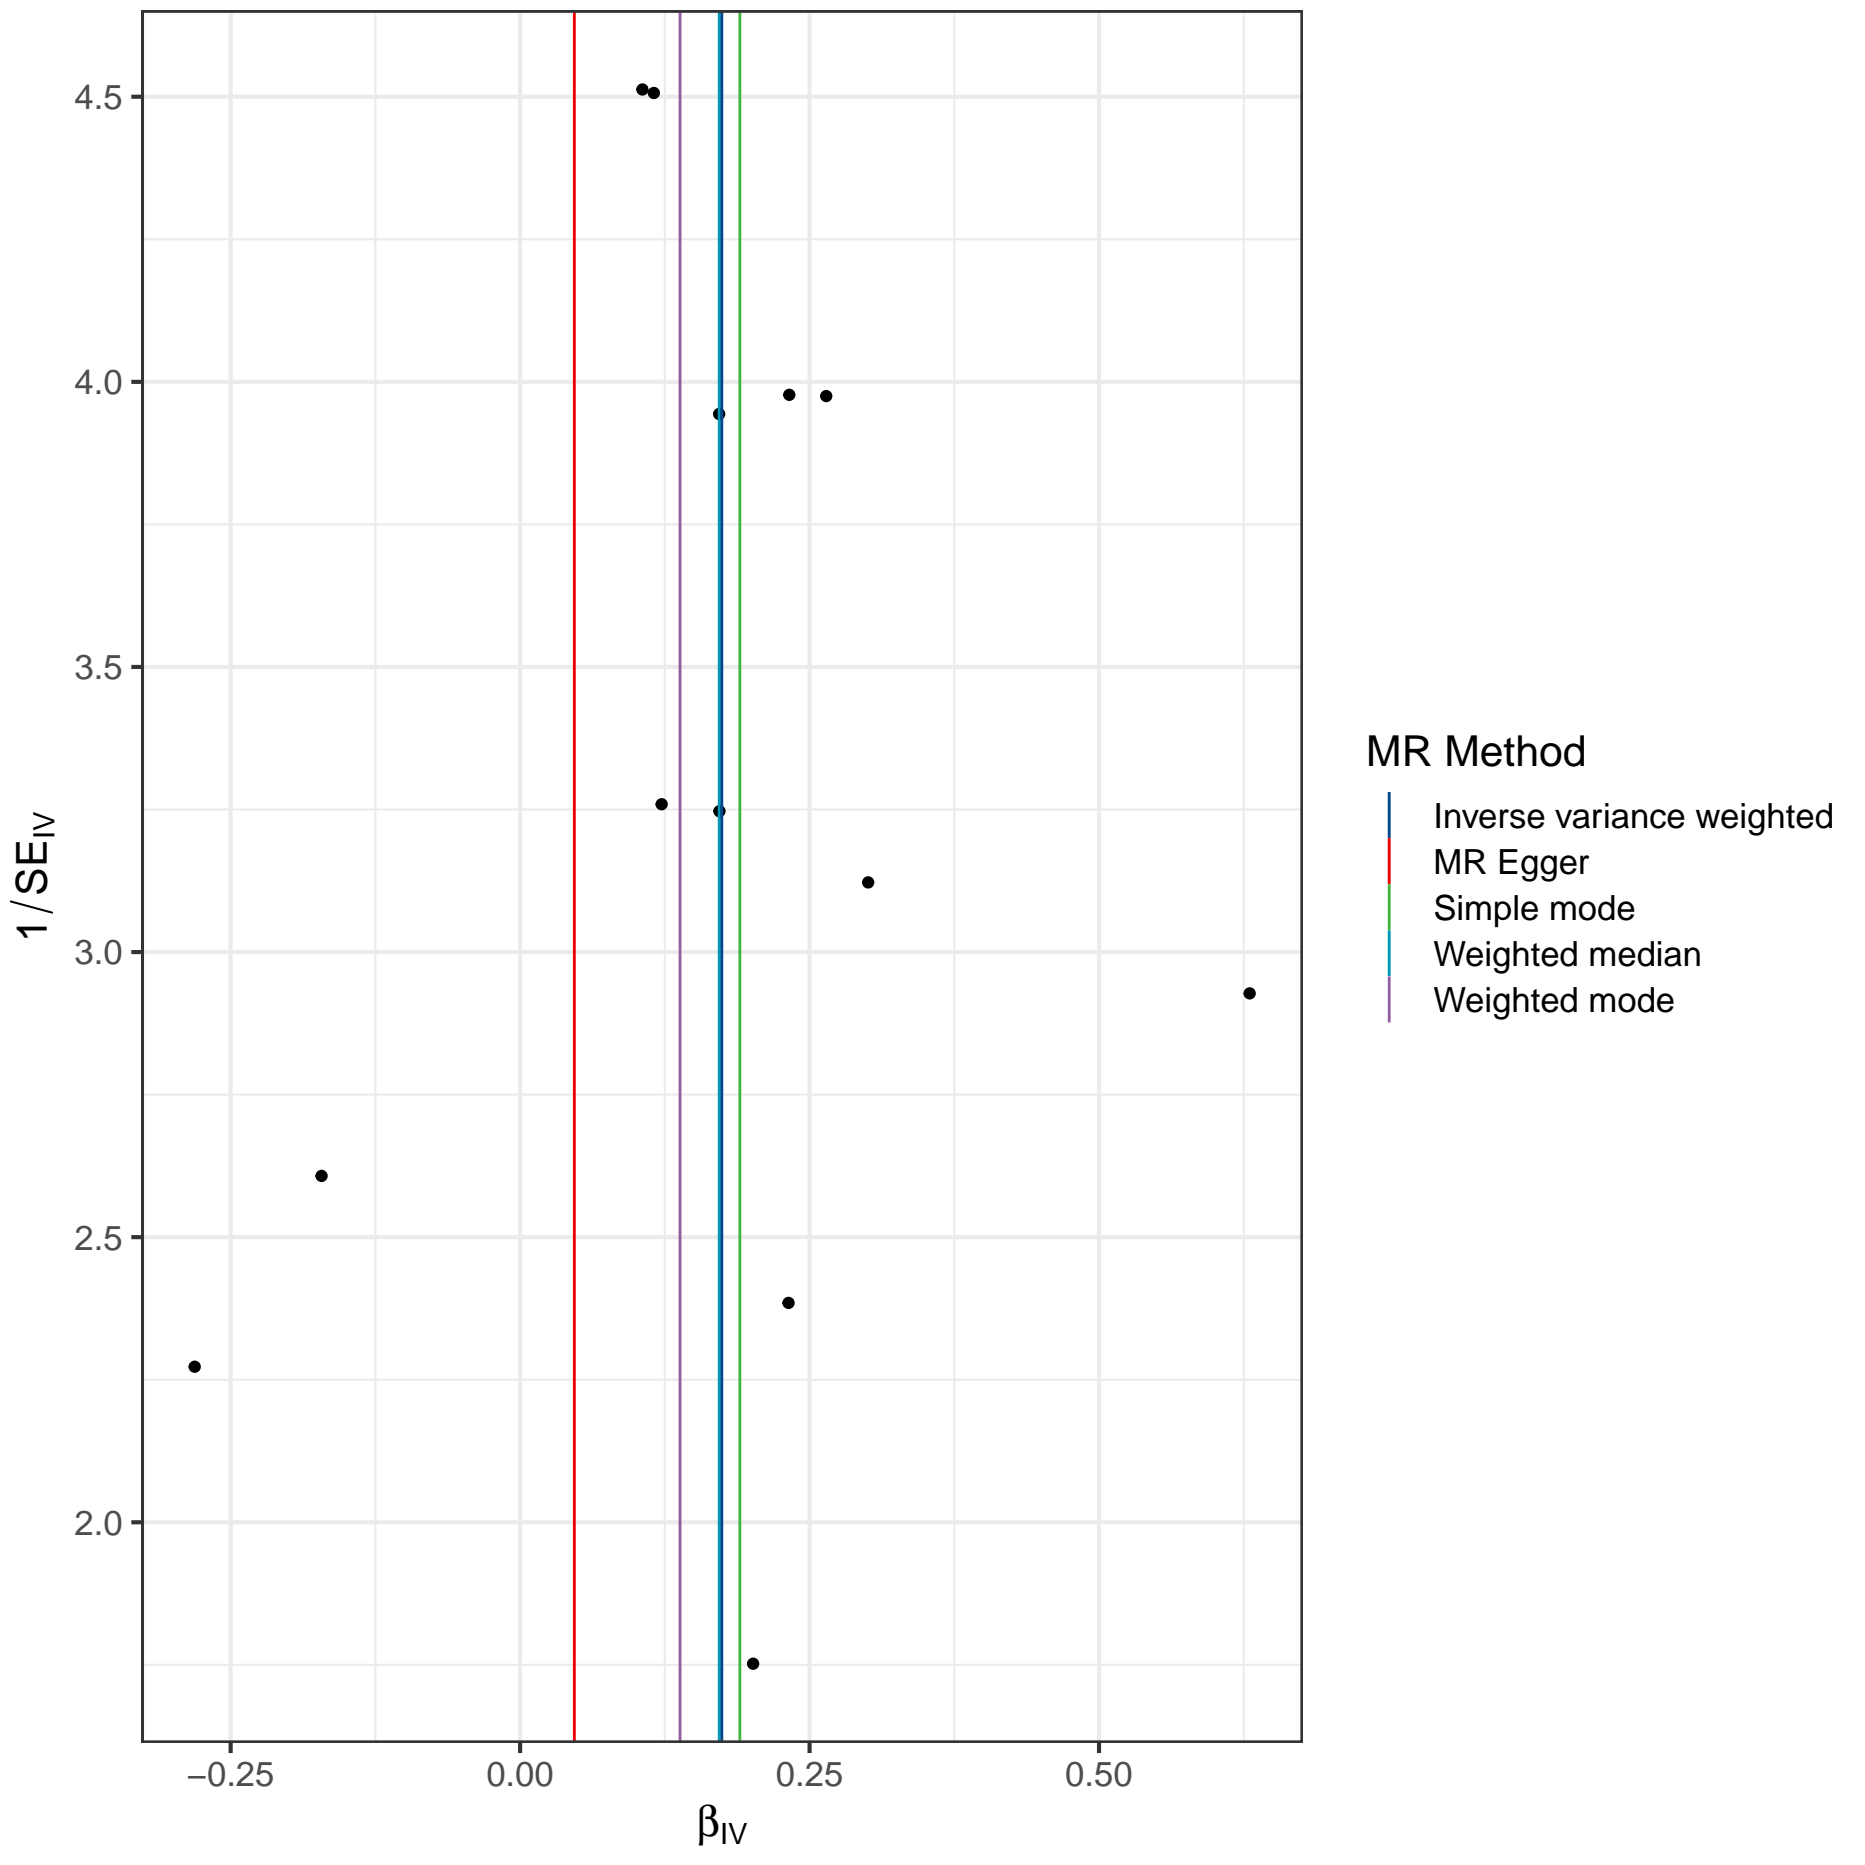

Supplement: Supplementary file [file media-8.pdf]
