# Supplementary material for: Cerebrospinal Fluid and Plasma Metabolites with Parkinson’s Disease: A Mendelian Randomization Study
Source: bioRxiv or medRxiv preprint supplement (doi:10.1101/2024.07.19.24310687), 2024-07-19
Supplement: Supplementary file [file media-1.pdf]

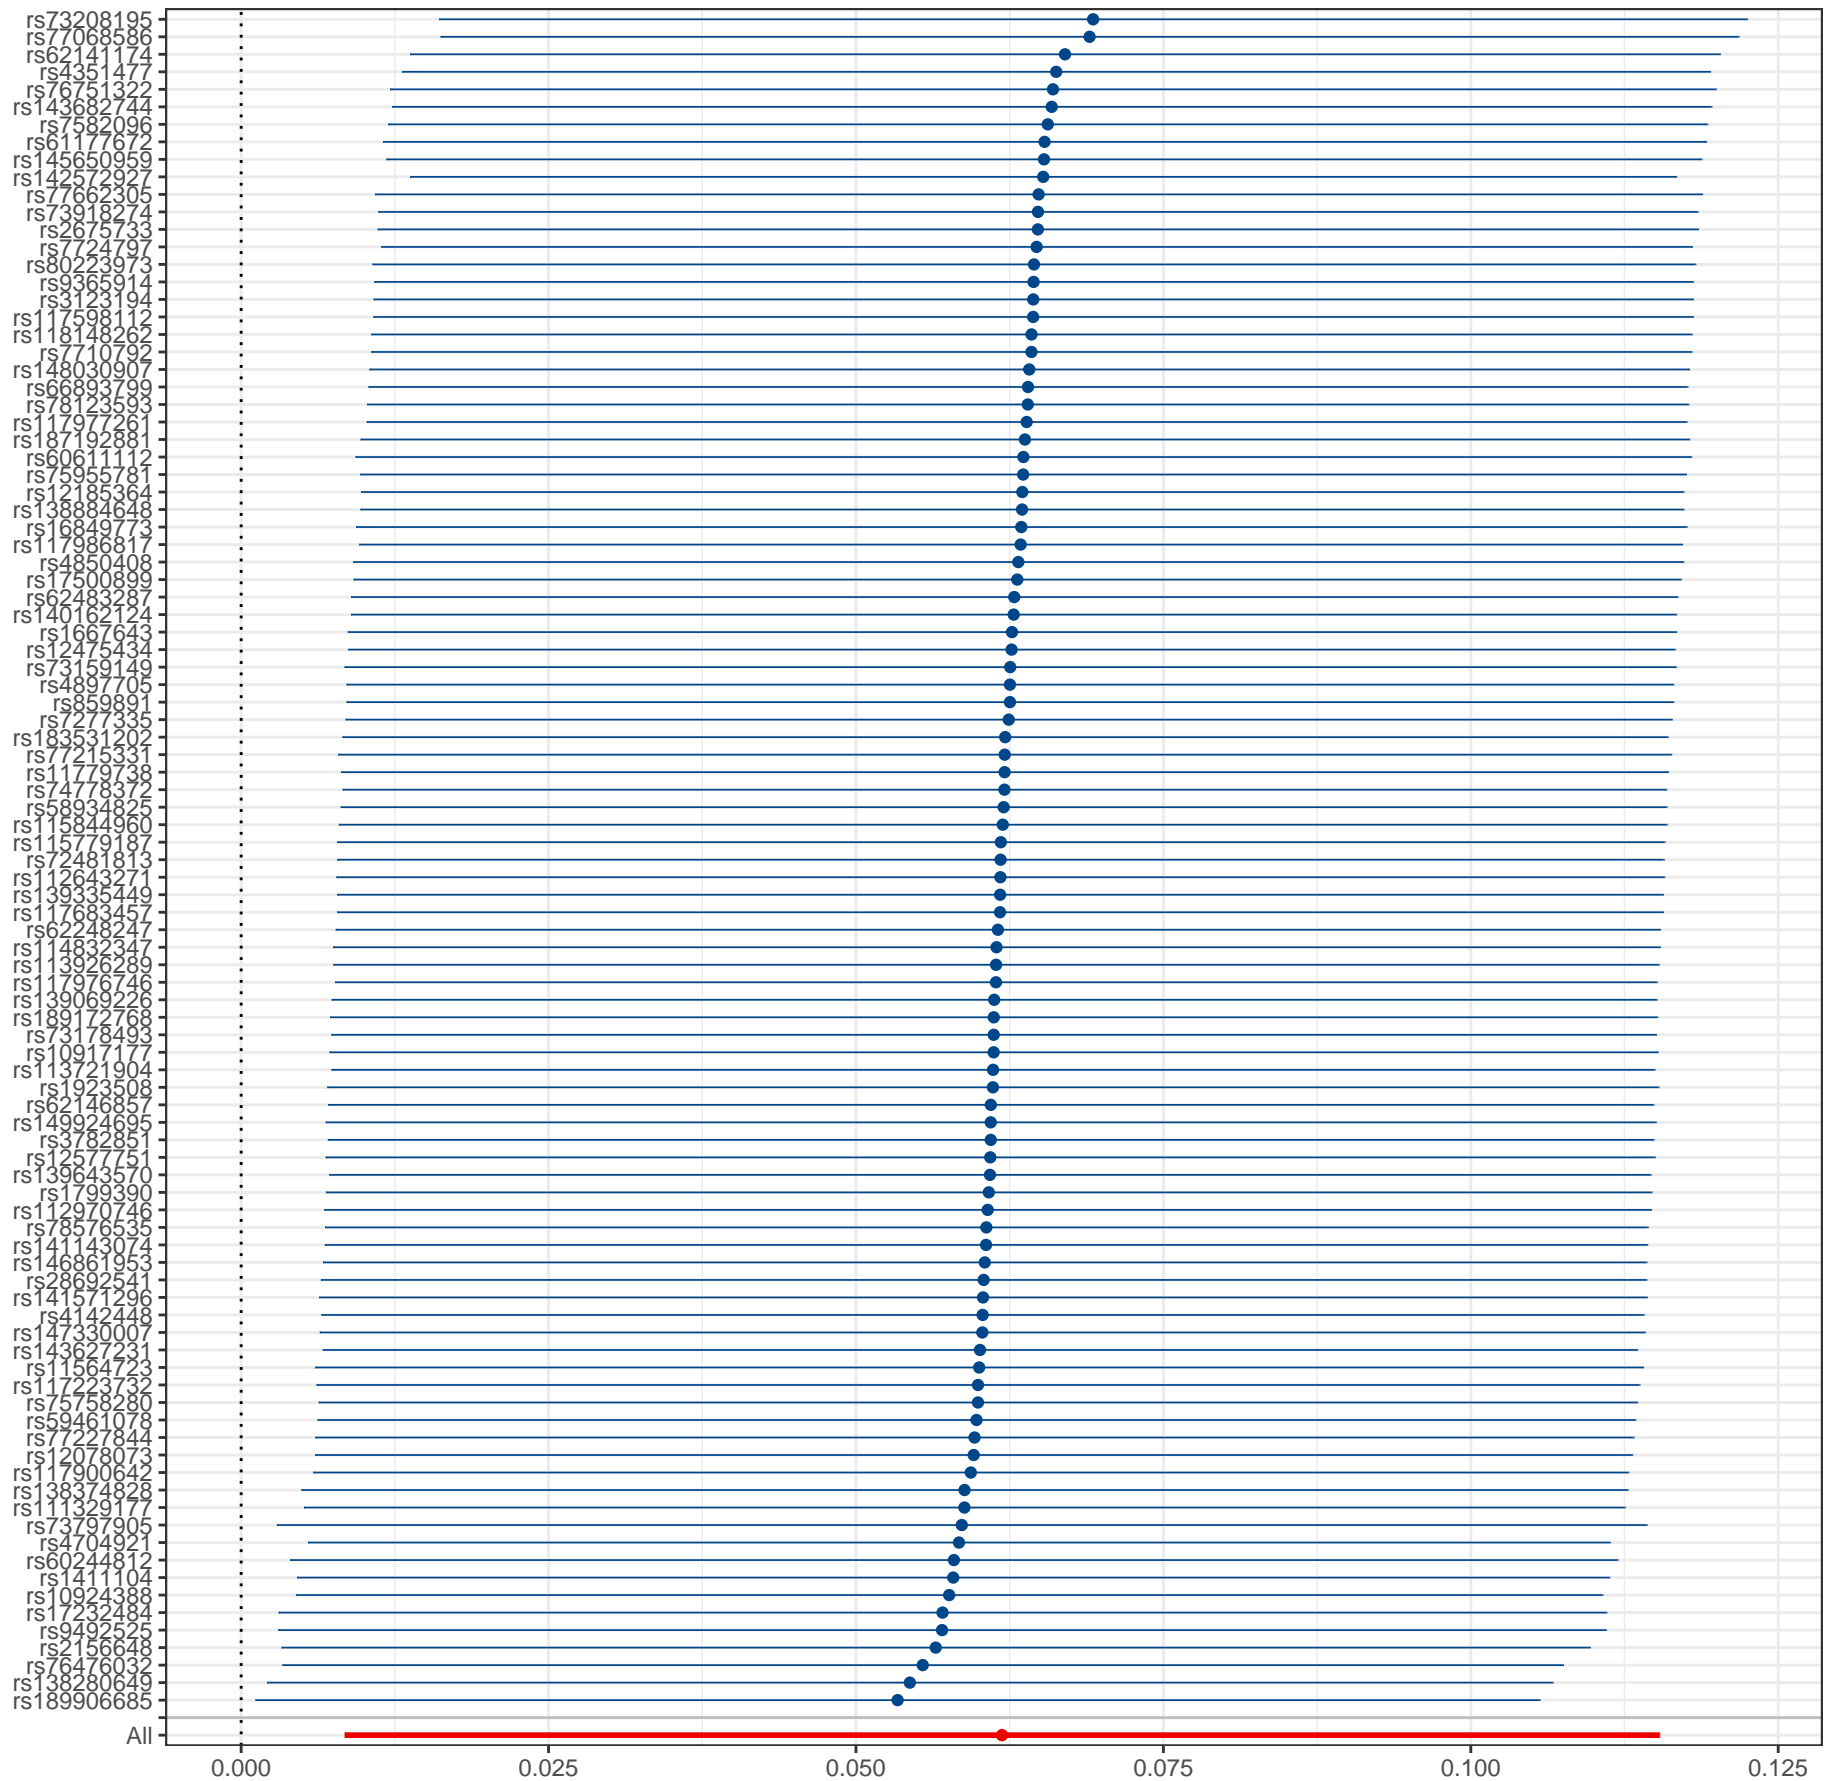

MR leave-one-out sensitivity analysis for 'Dimethylglycine levels' on 'Parkinson's disease || id:ieu-b-7'

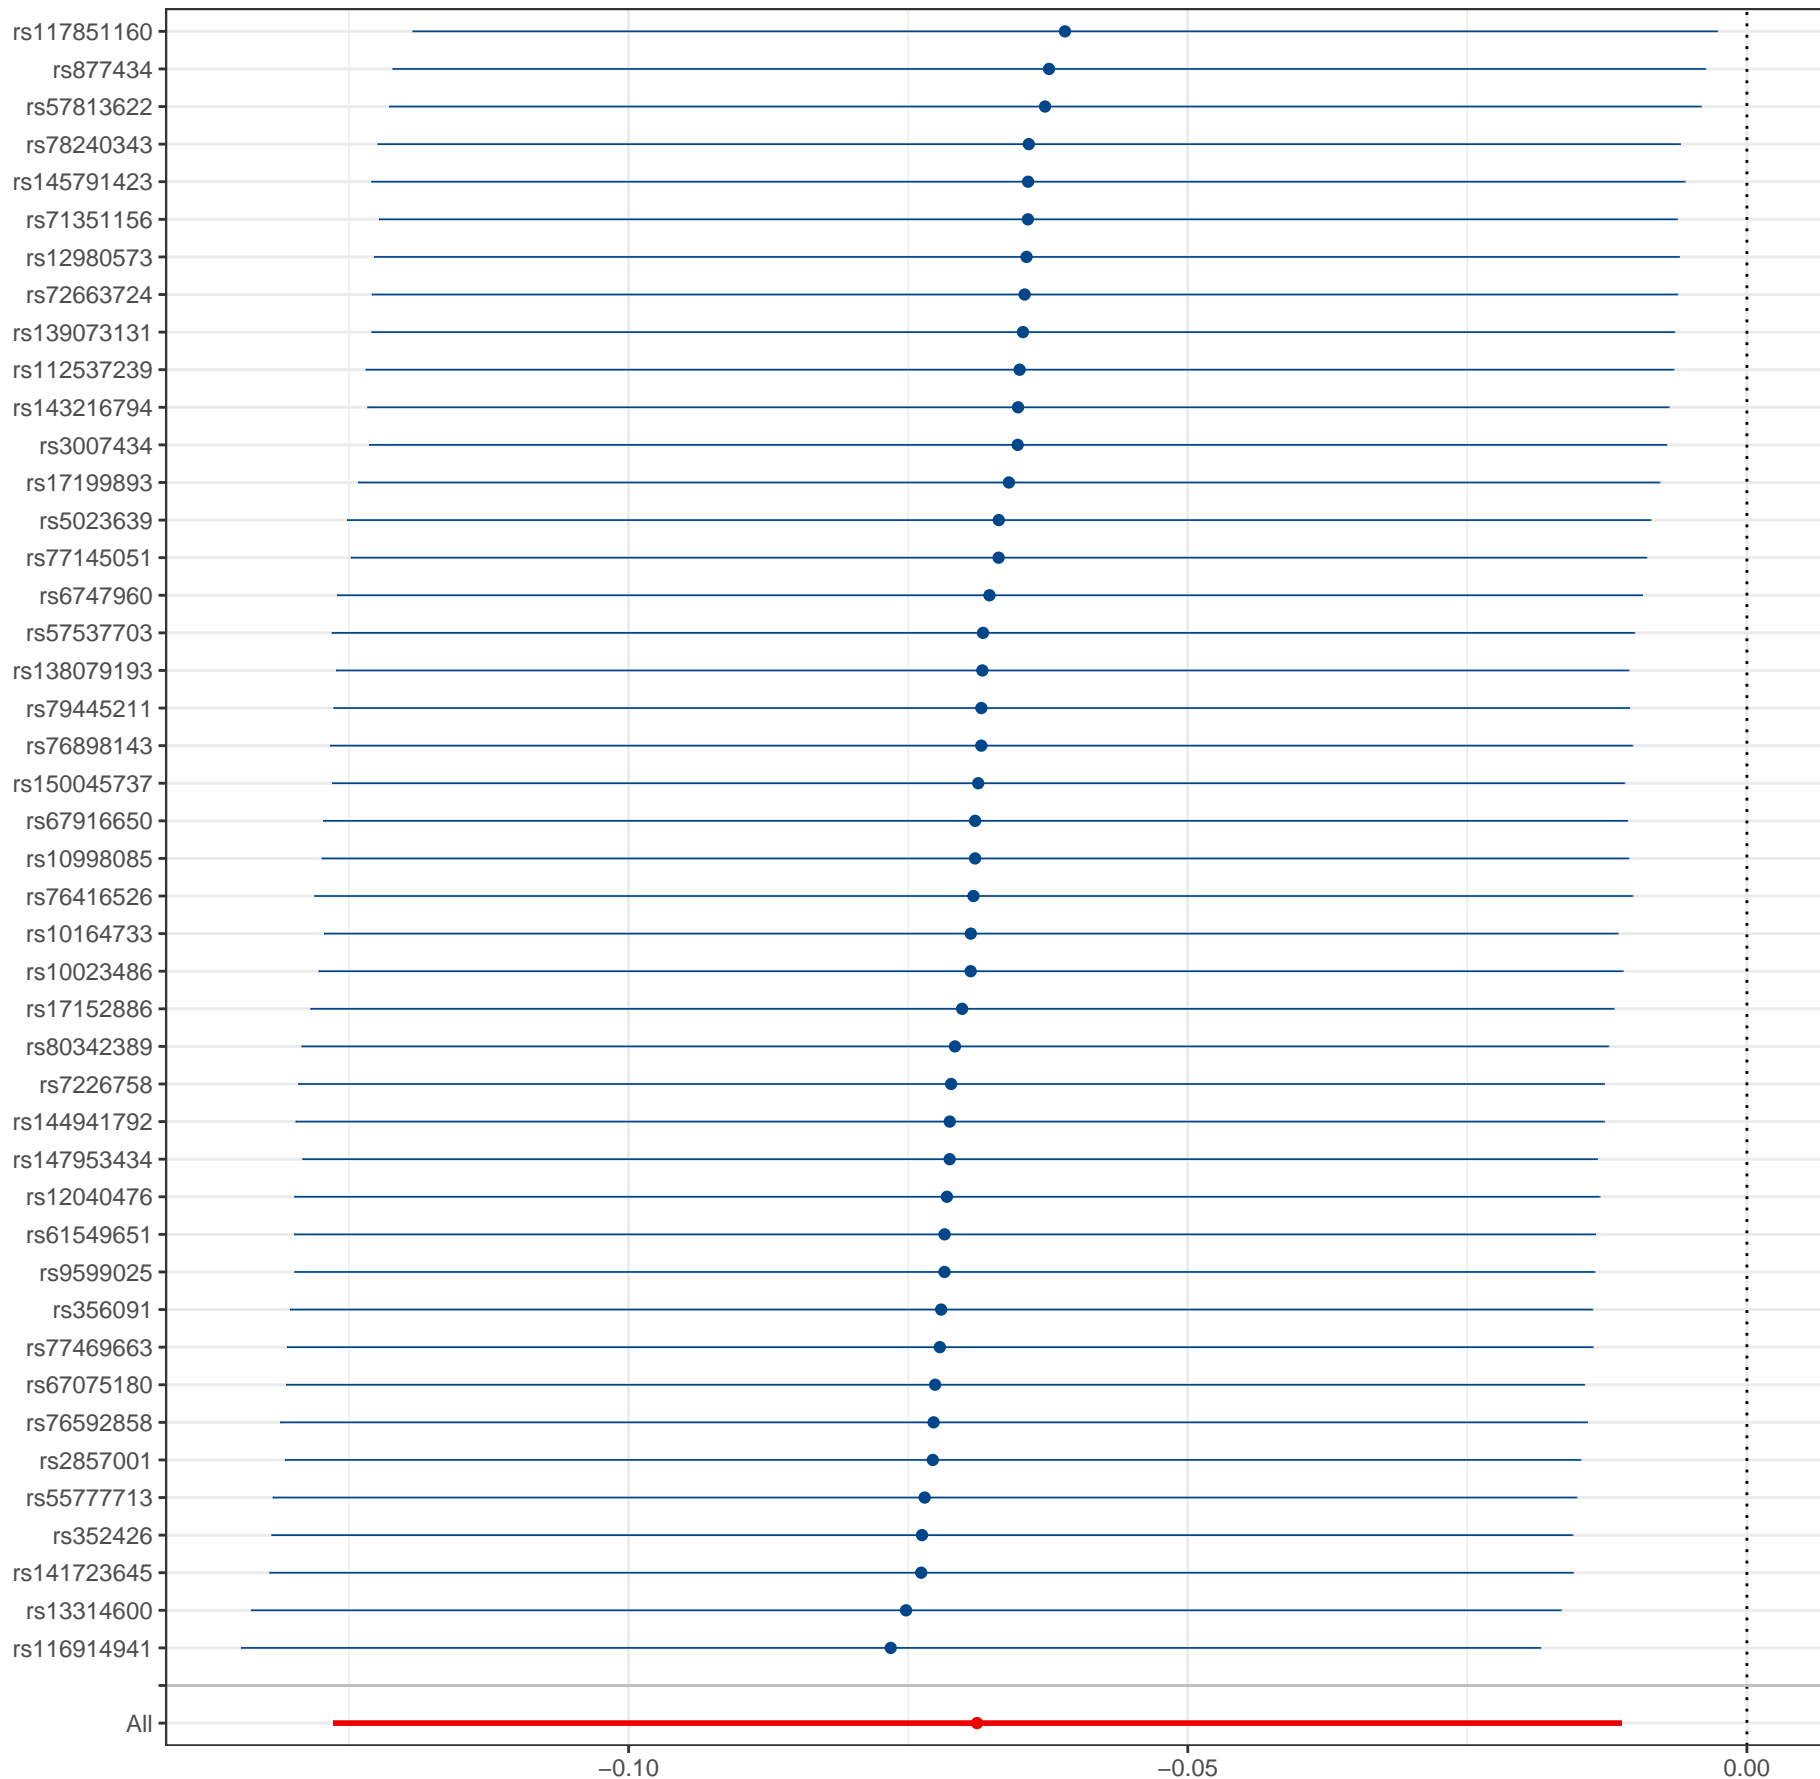

MR leave-one-out sensitivity analysis for '1-(1-enyl-palmitoyl)-2-arachidonoyl-gpc (p-16:0/20:4) levels' on 'Parkinson's disease || id:ieu-b-7'

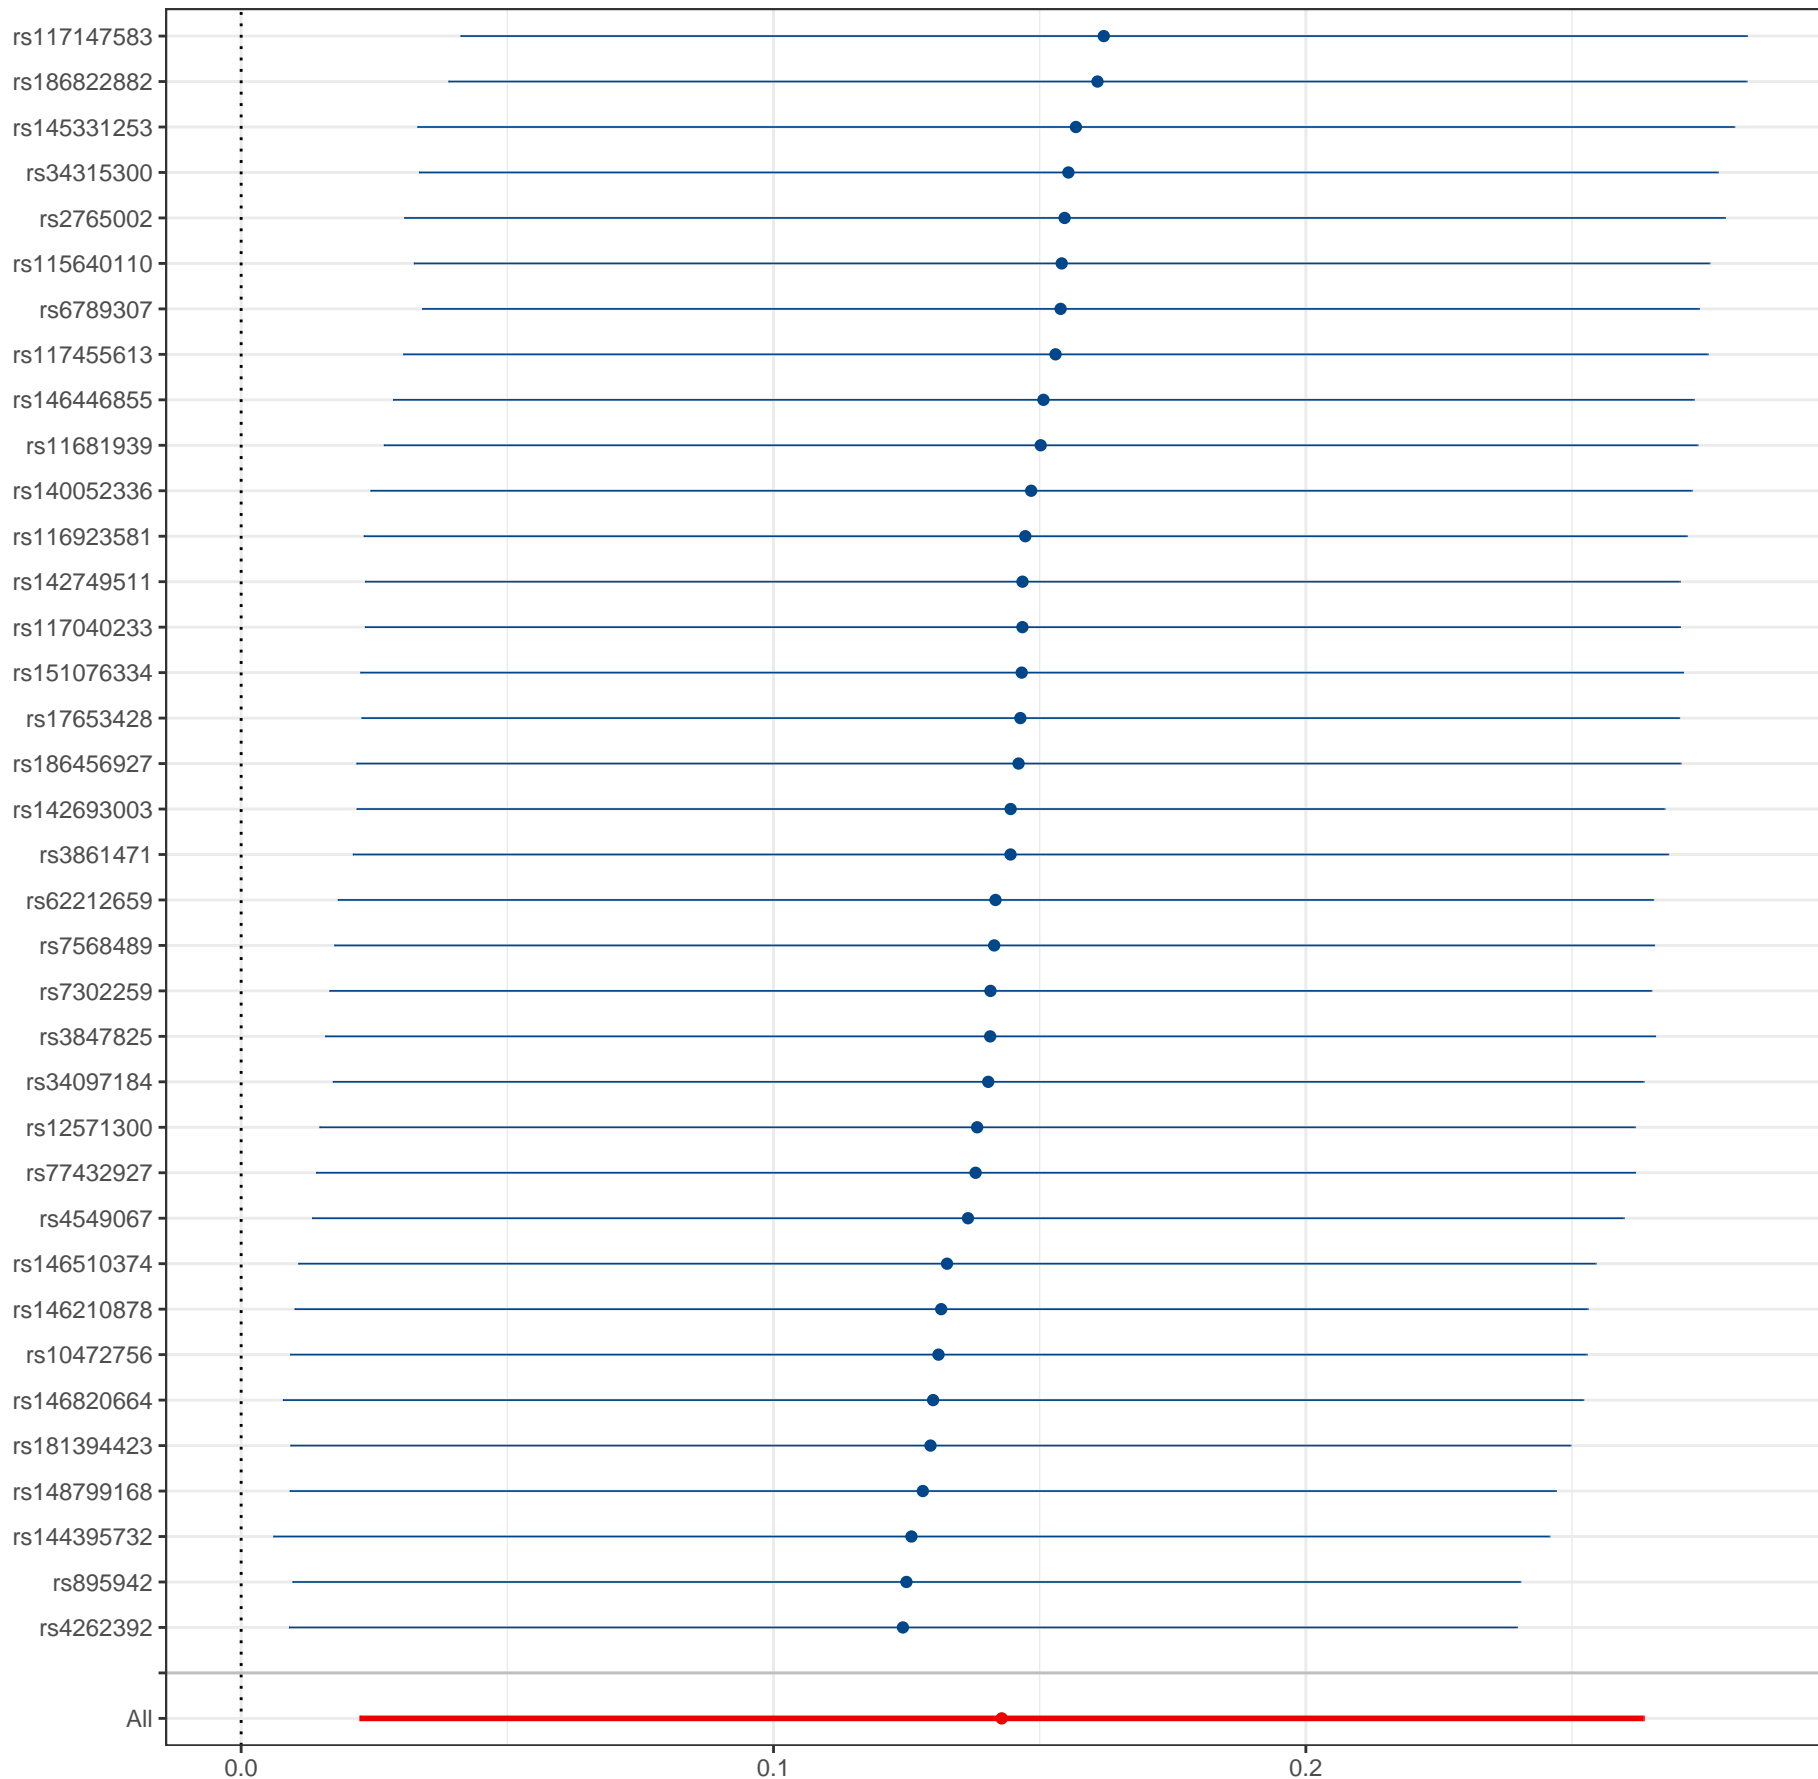

MR leave-one-out sensitivity analysis for '1-stearoyl-2-docosaheptaenoyl-gpc (18:0/22:6) levels' on 'Parkinson's disease || id:ieu-b-7'

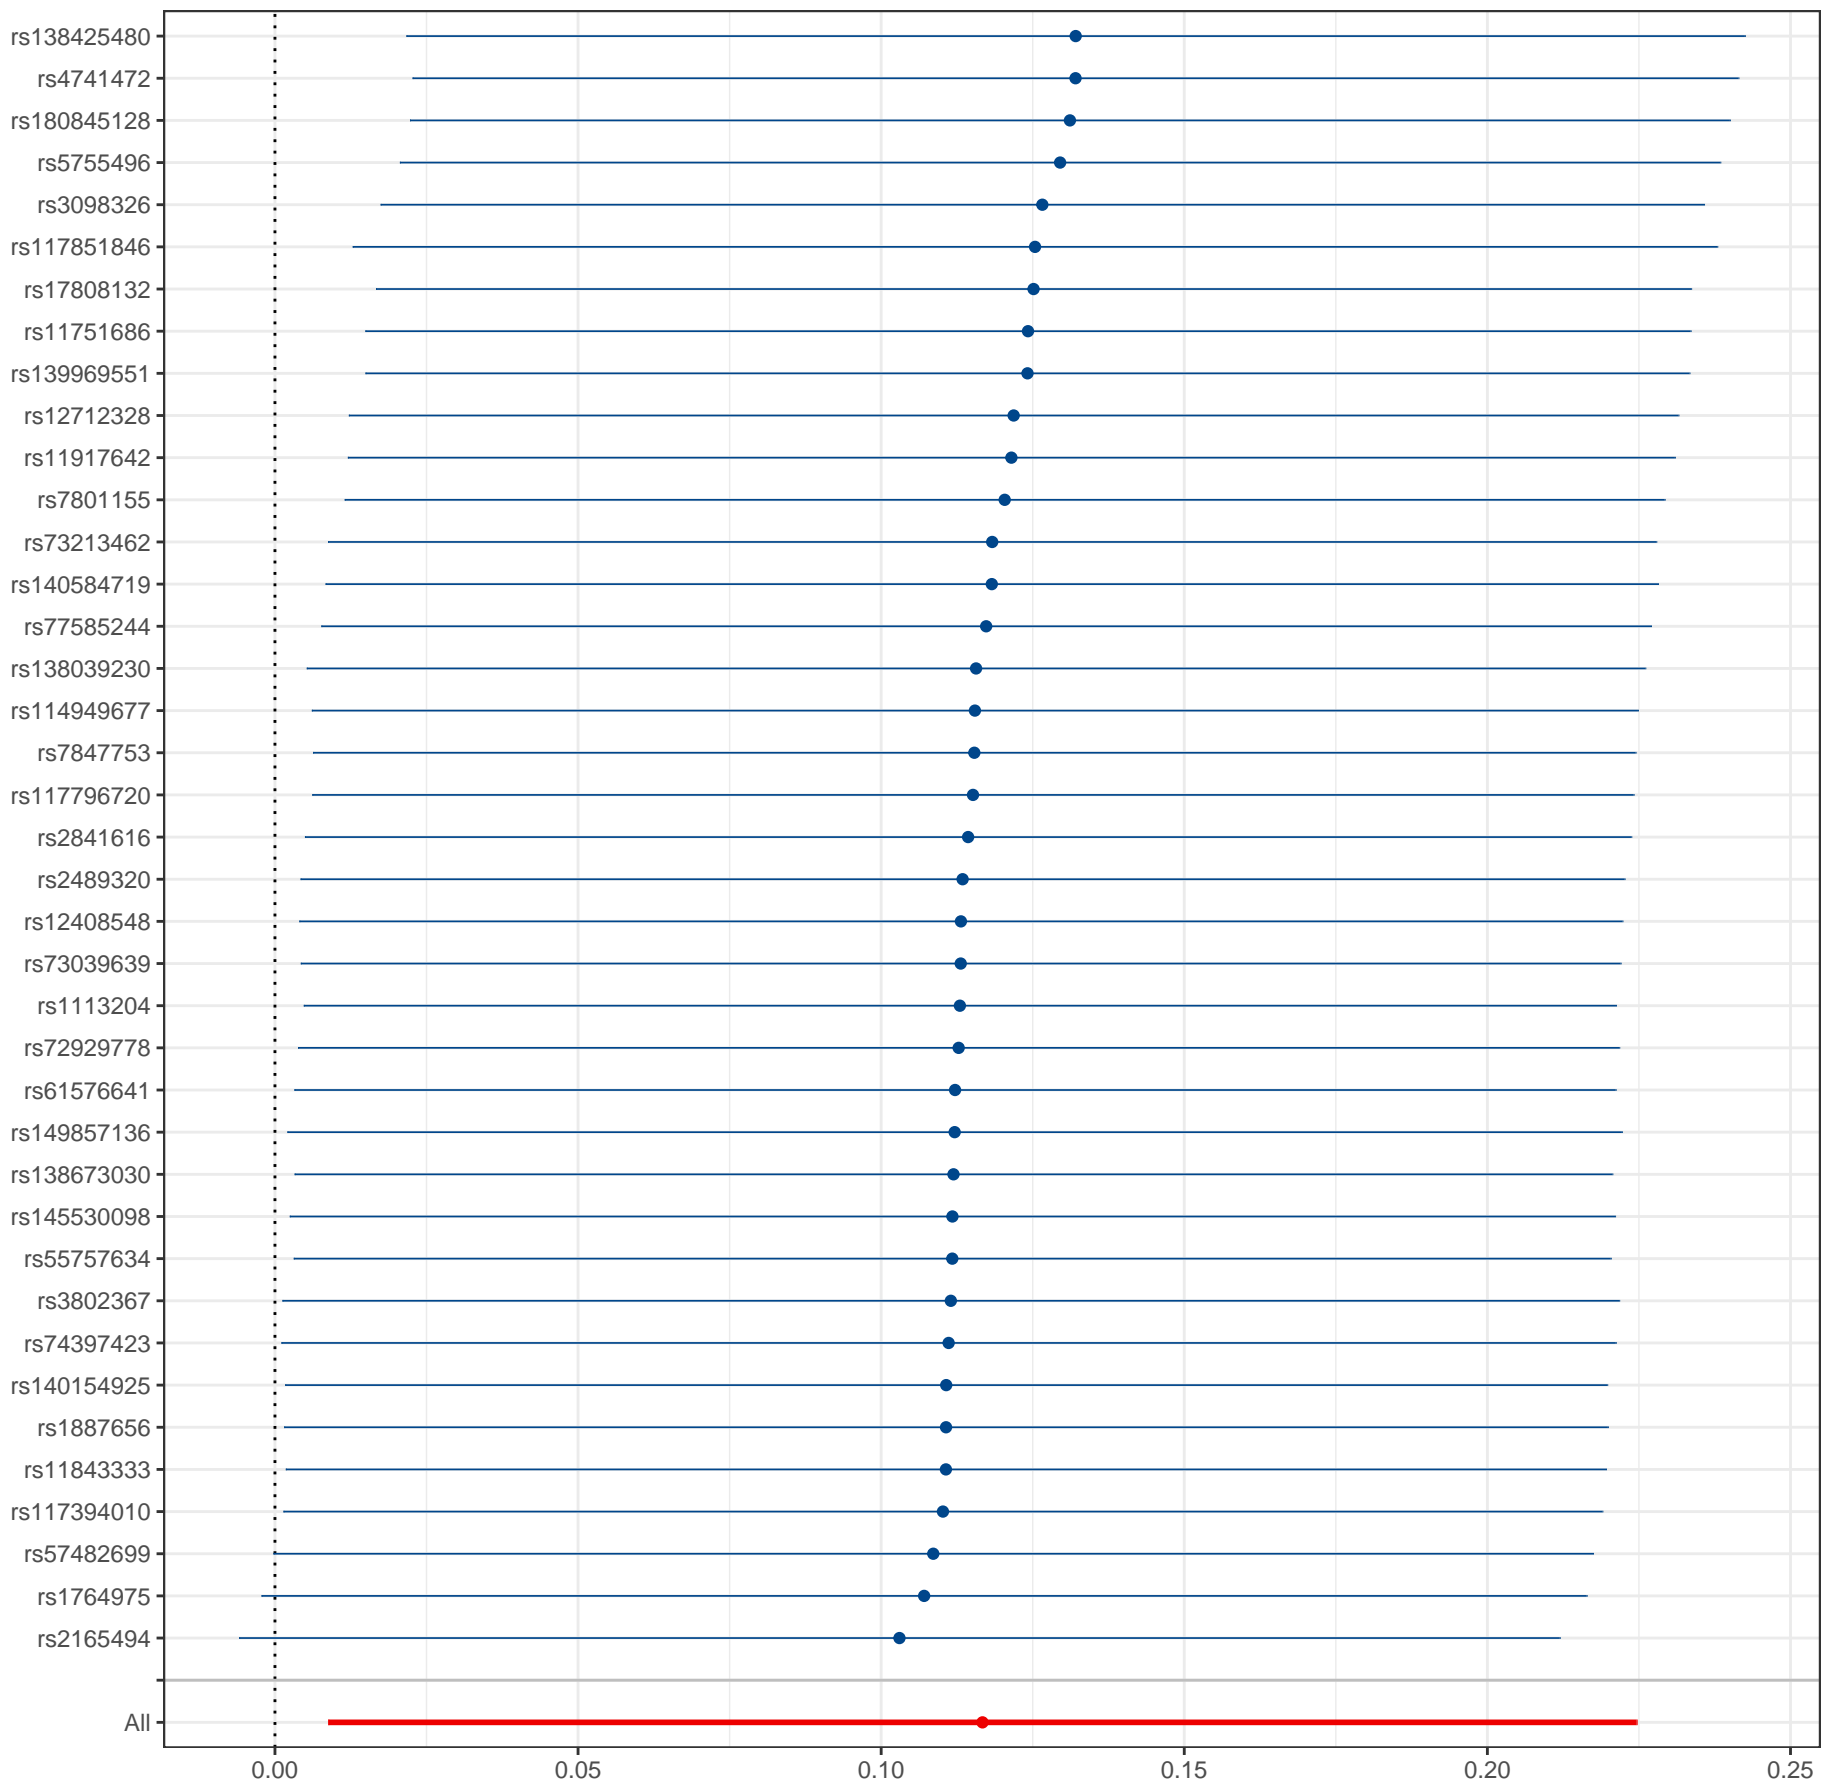

MR leave-one-out sensitivity analysis for 'Gluconate levels' on 'Parkinson's disease || id:ieu-b-7'

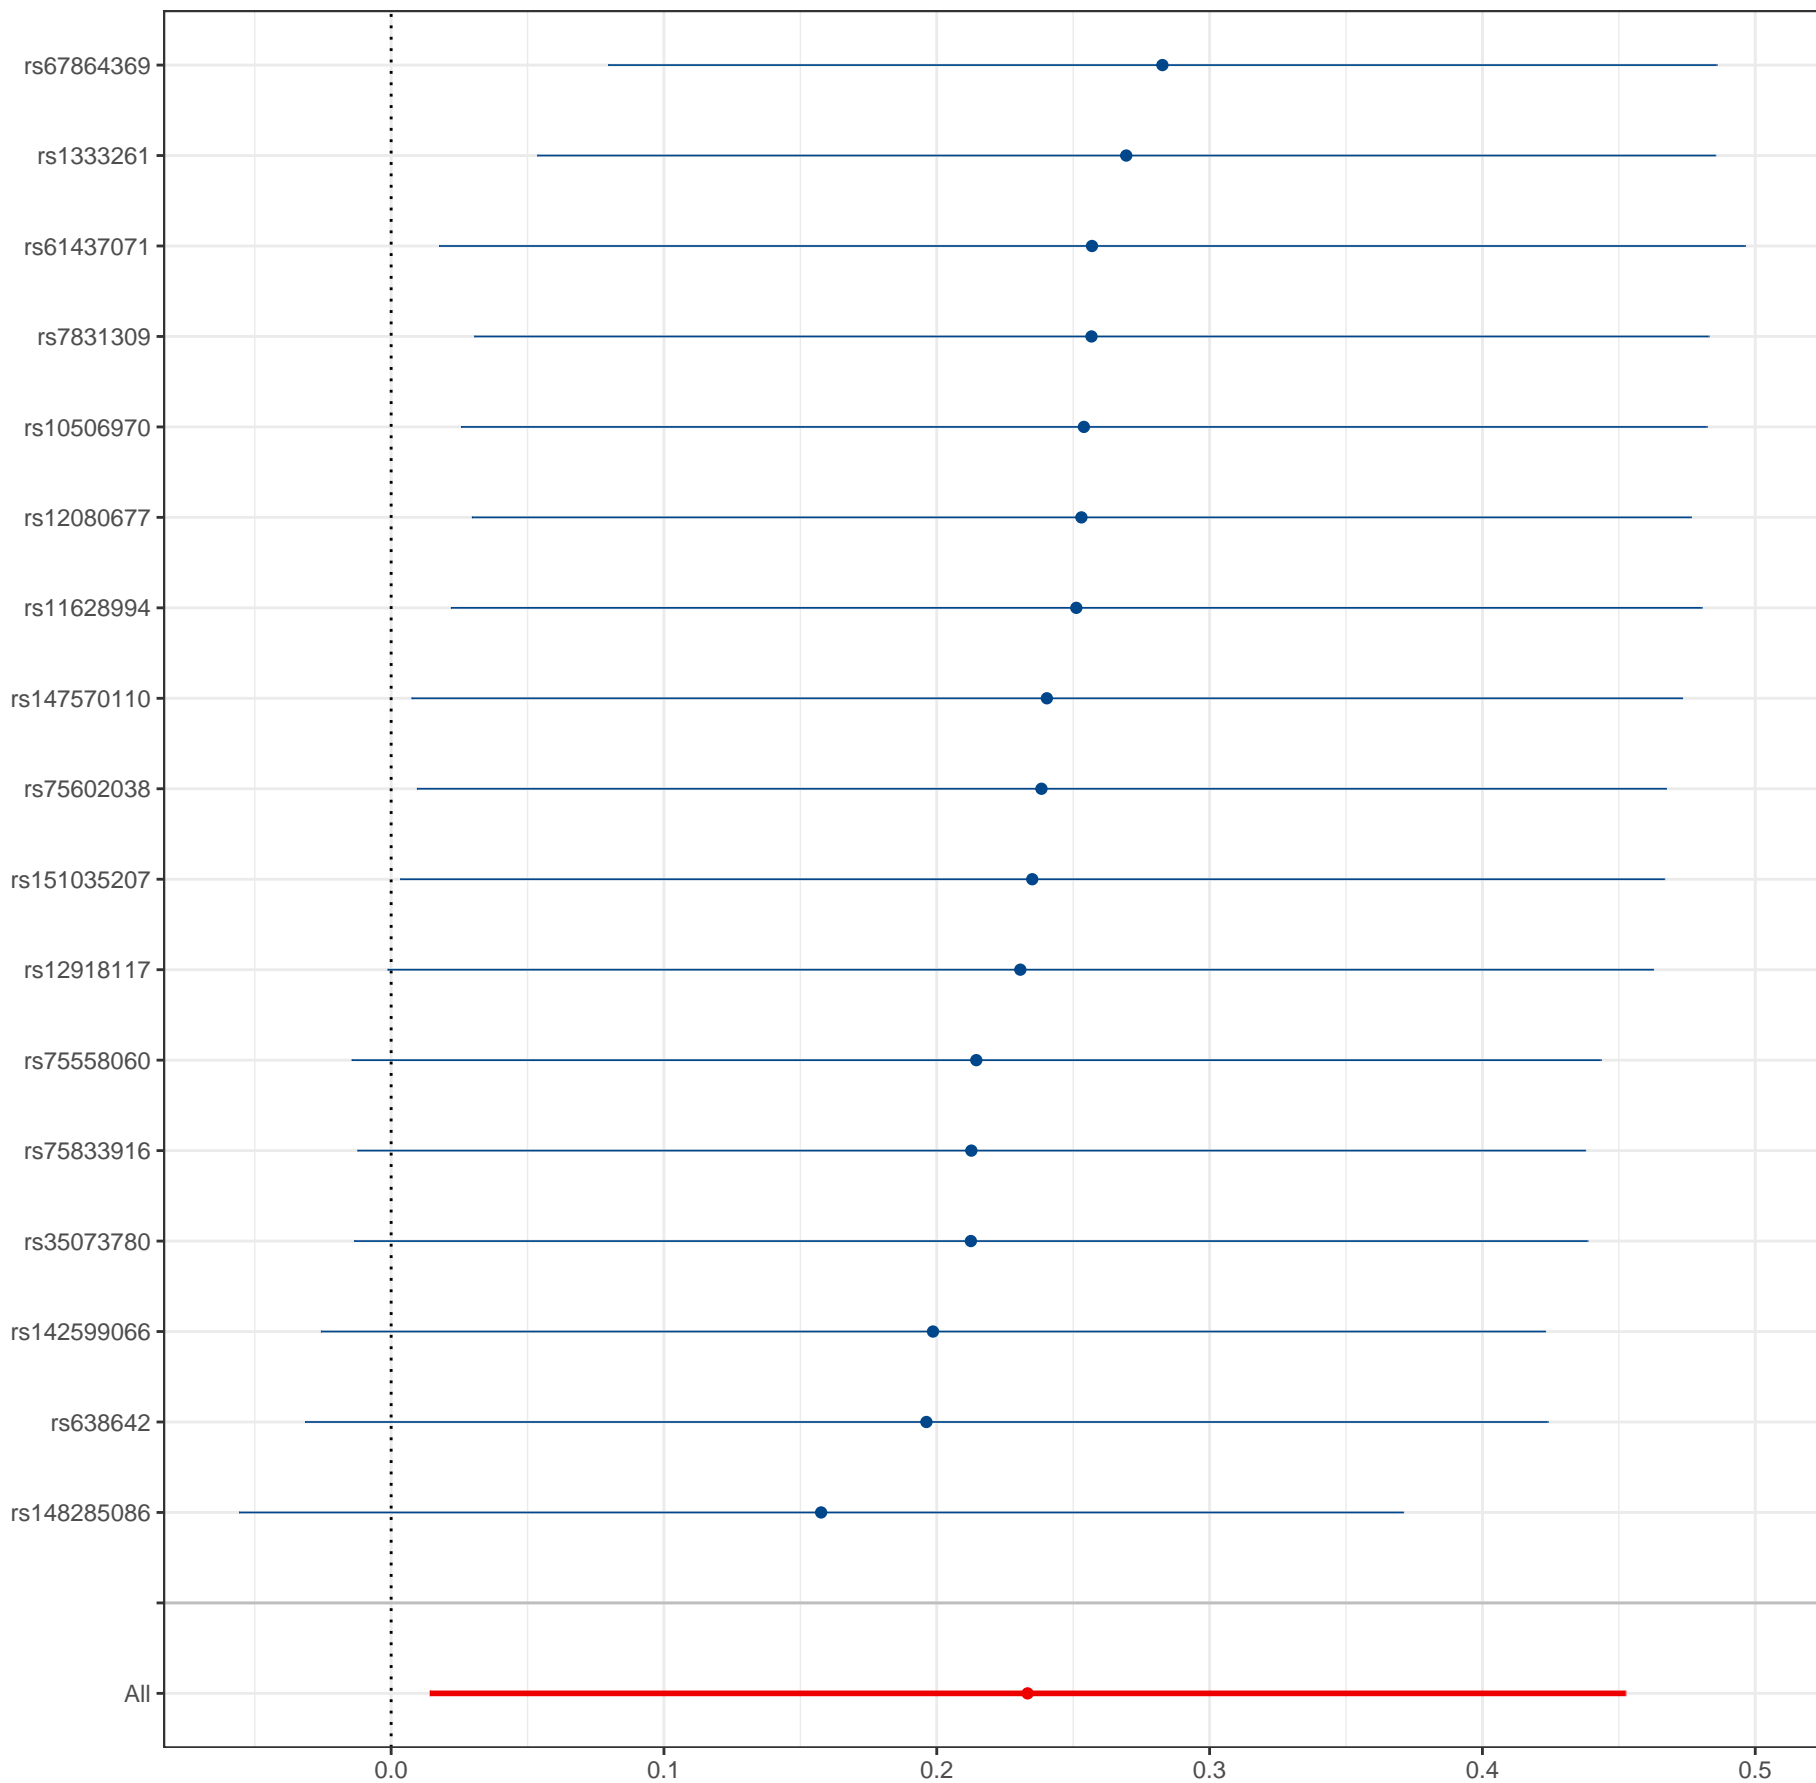

MR leave-one-out sensitivity analysis for 'Glycerophosphoinositol levels' on 'Parkinson's disease || id:ieu-b-7'

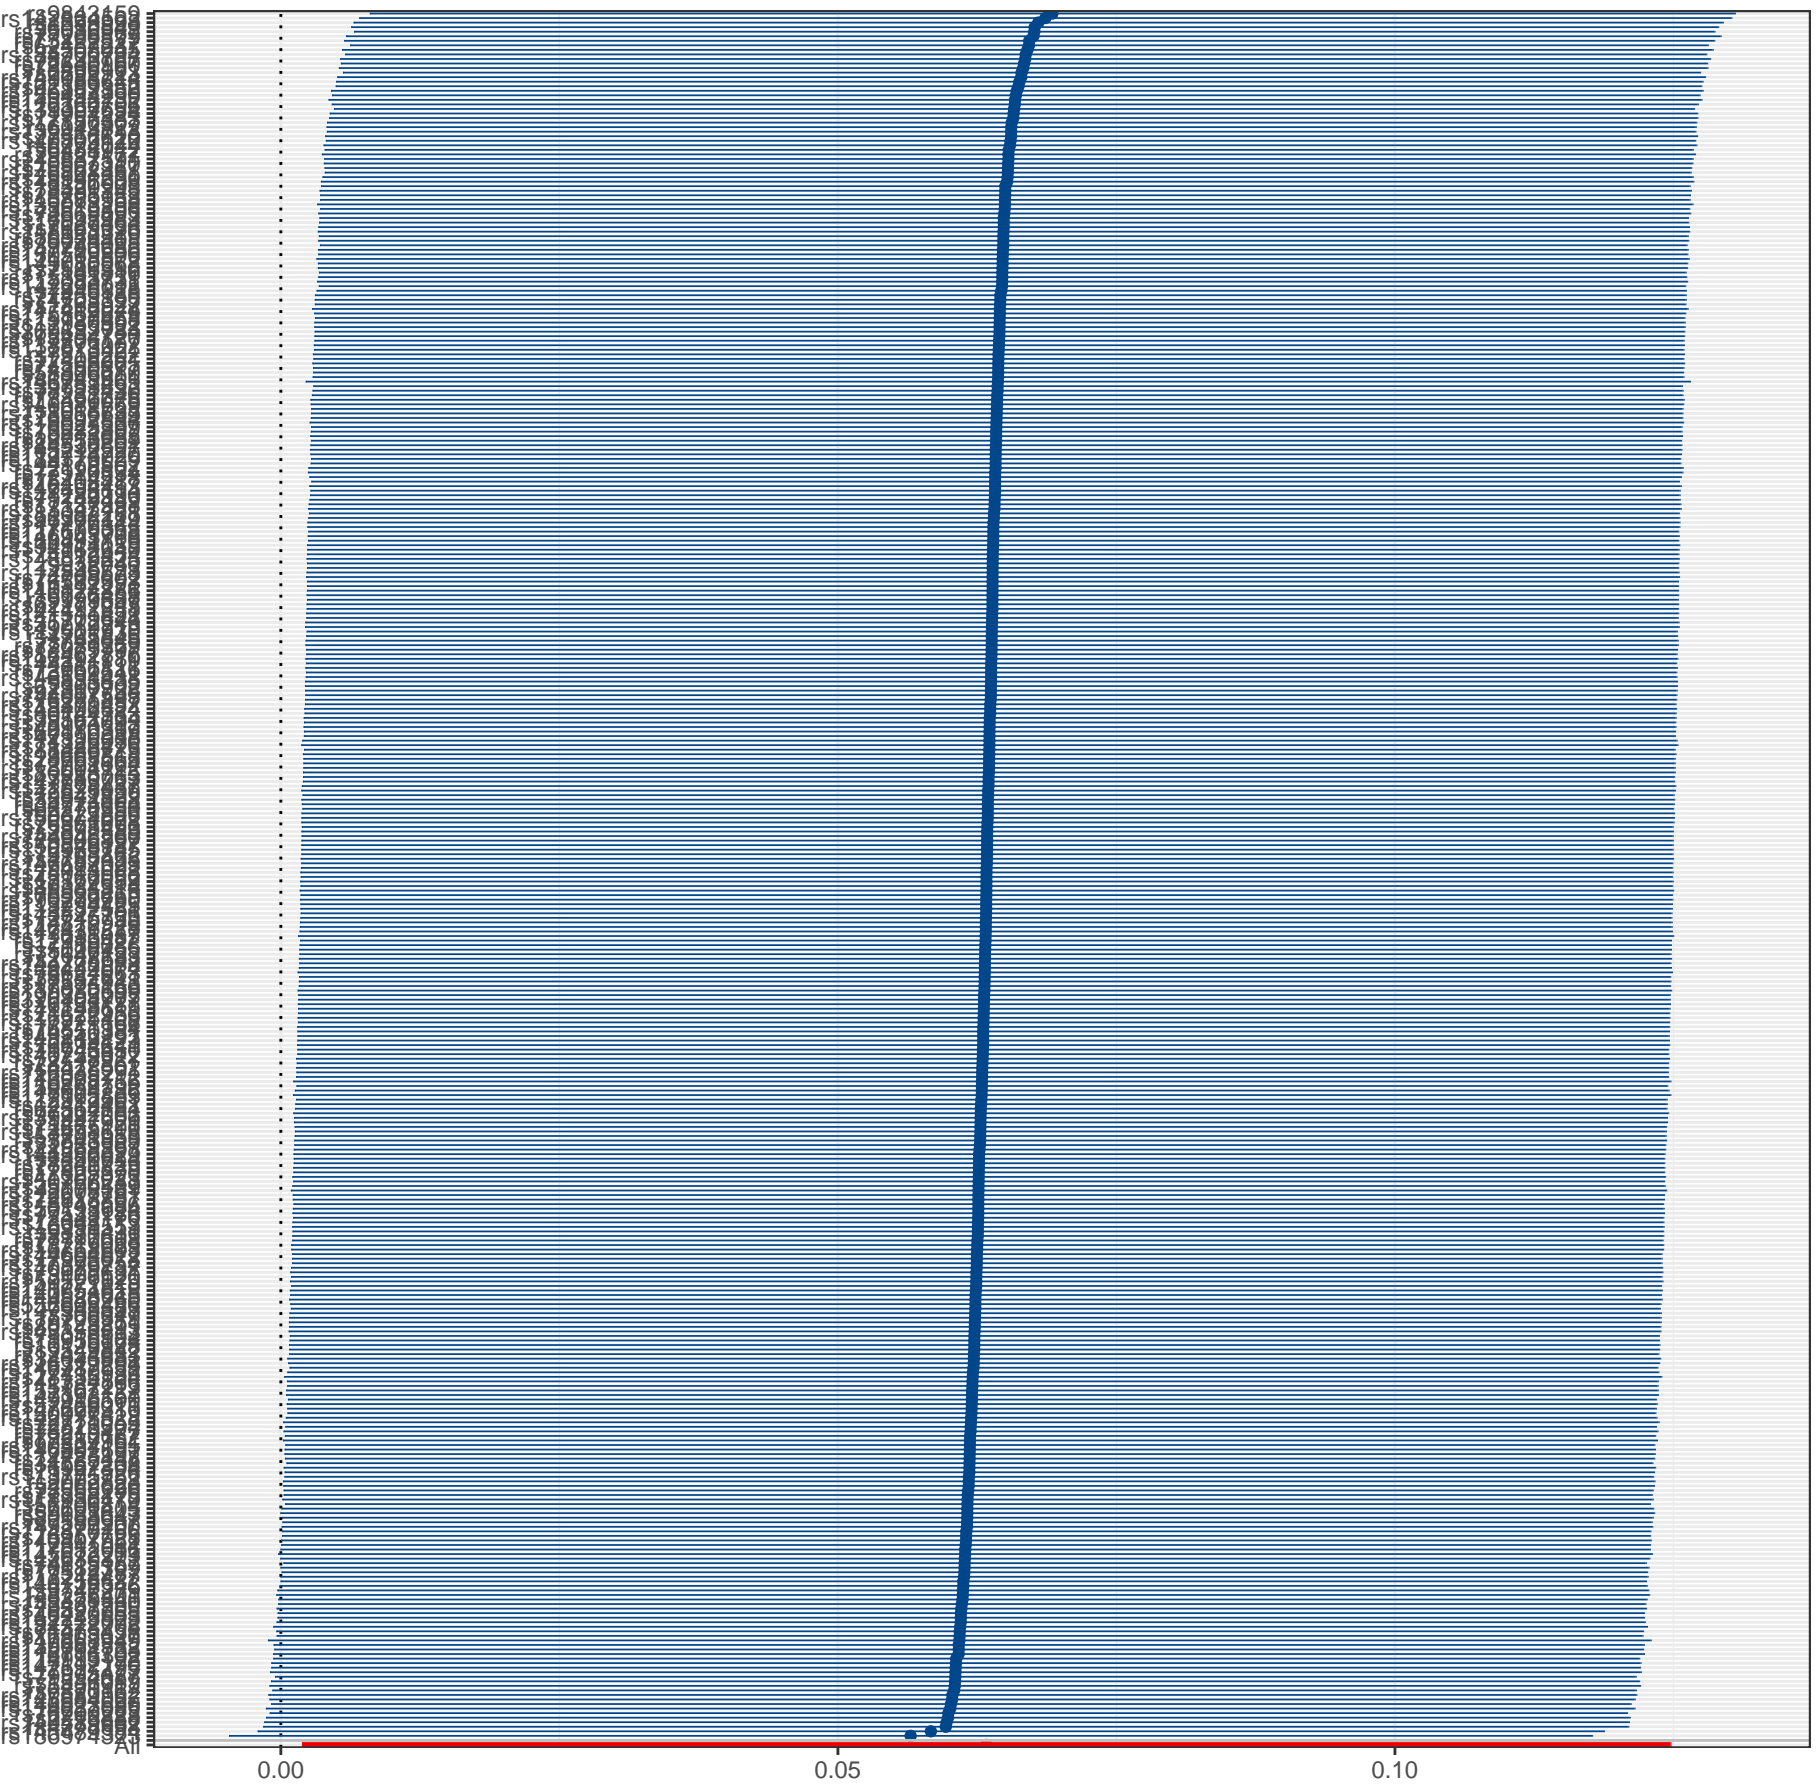

MR leave-one-out sensitivity analysis for  
'Oxalate (ethanedioate) levels' on 'Parkinson's disease || id:ieu-b-7'

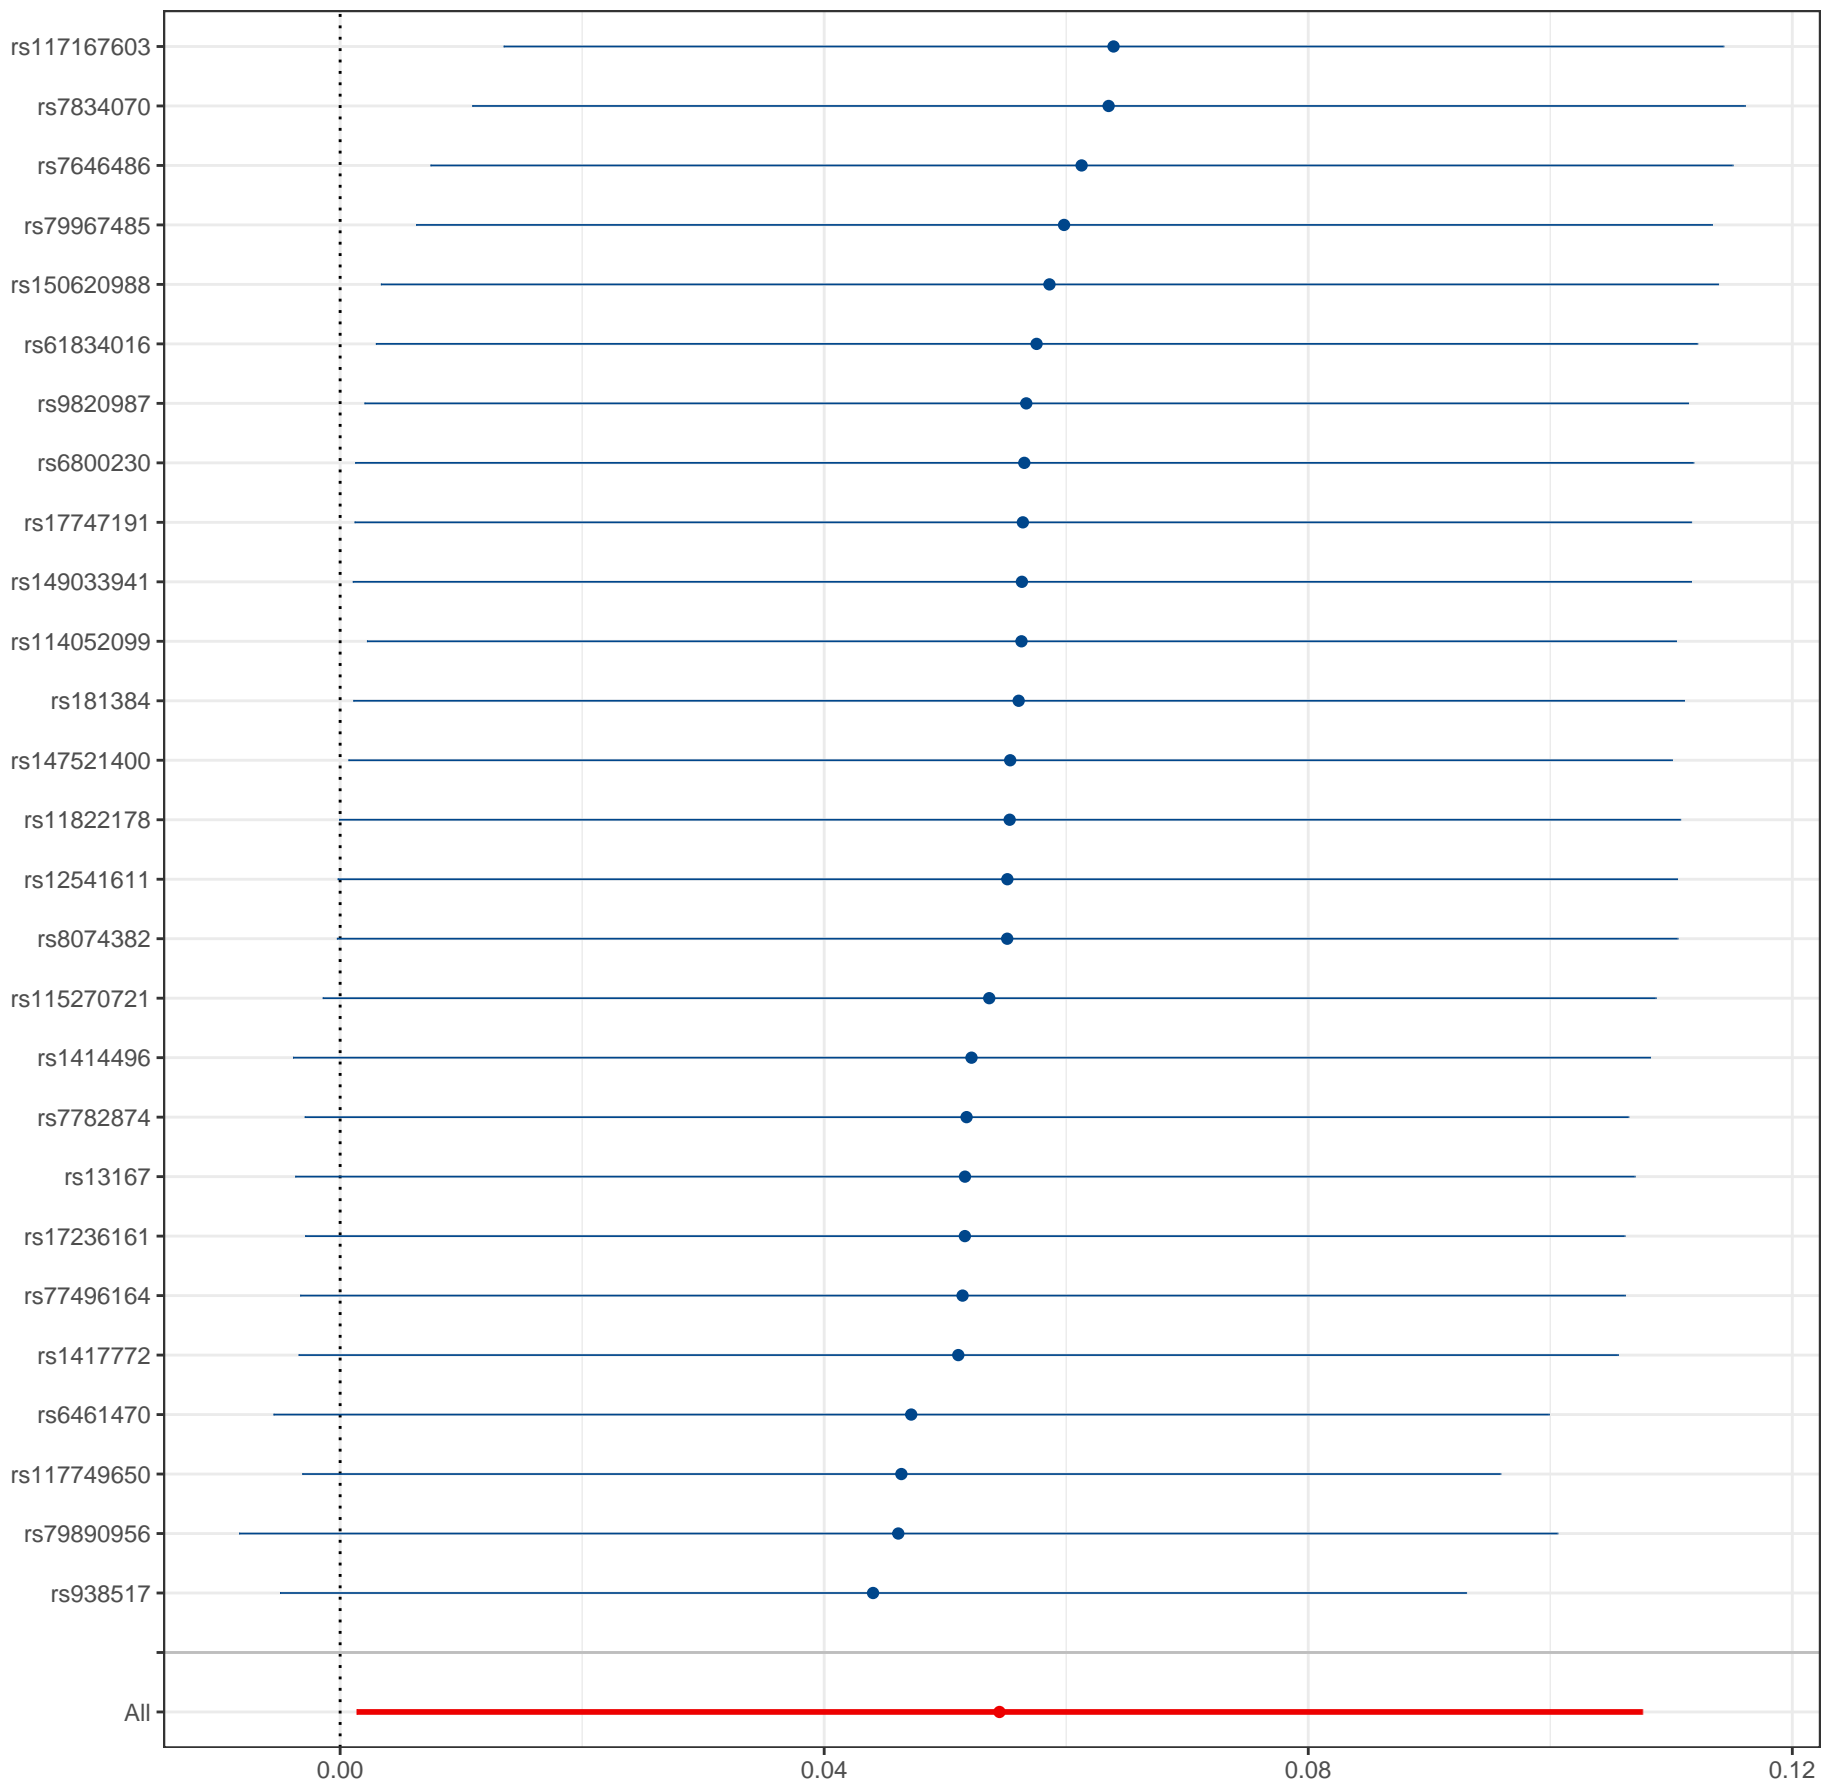

MR leave-one-out sensitivity analysis for 'X-12015 levels' on 'Parkinson's disease || id:ieu-b-7'

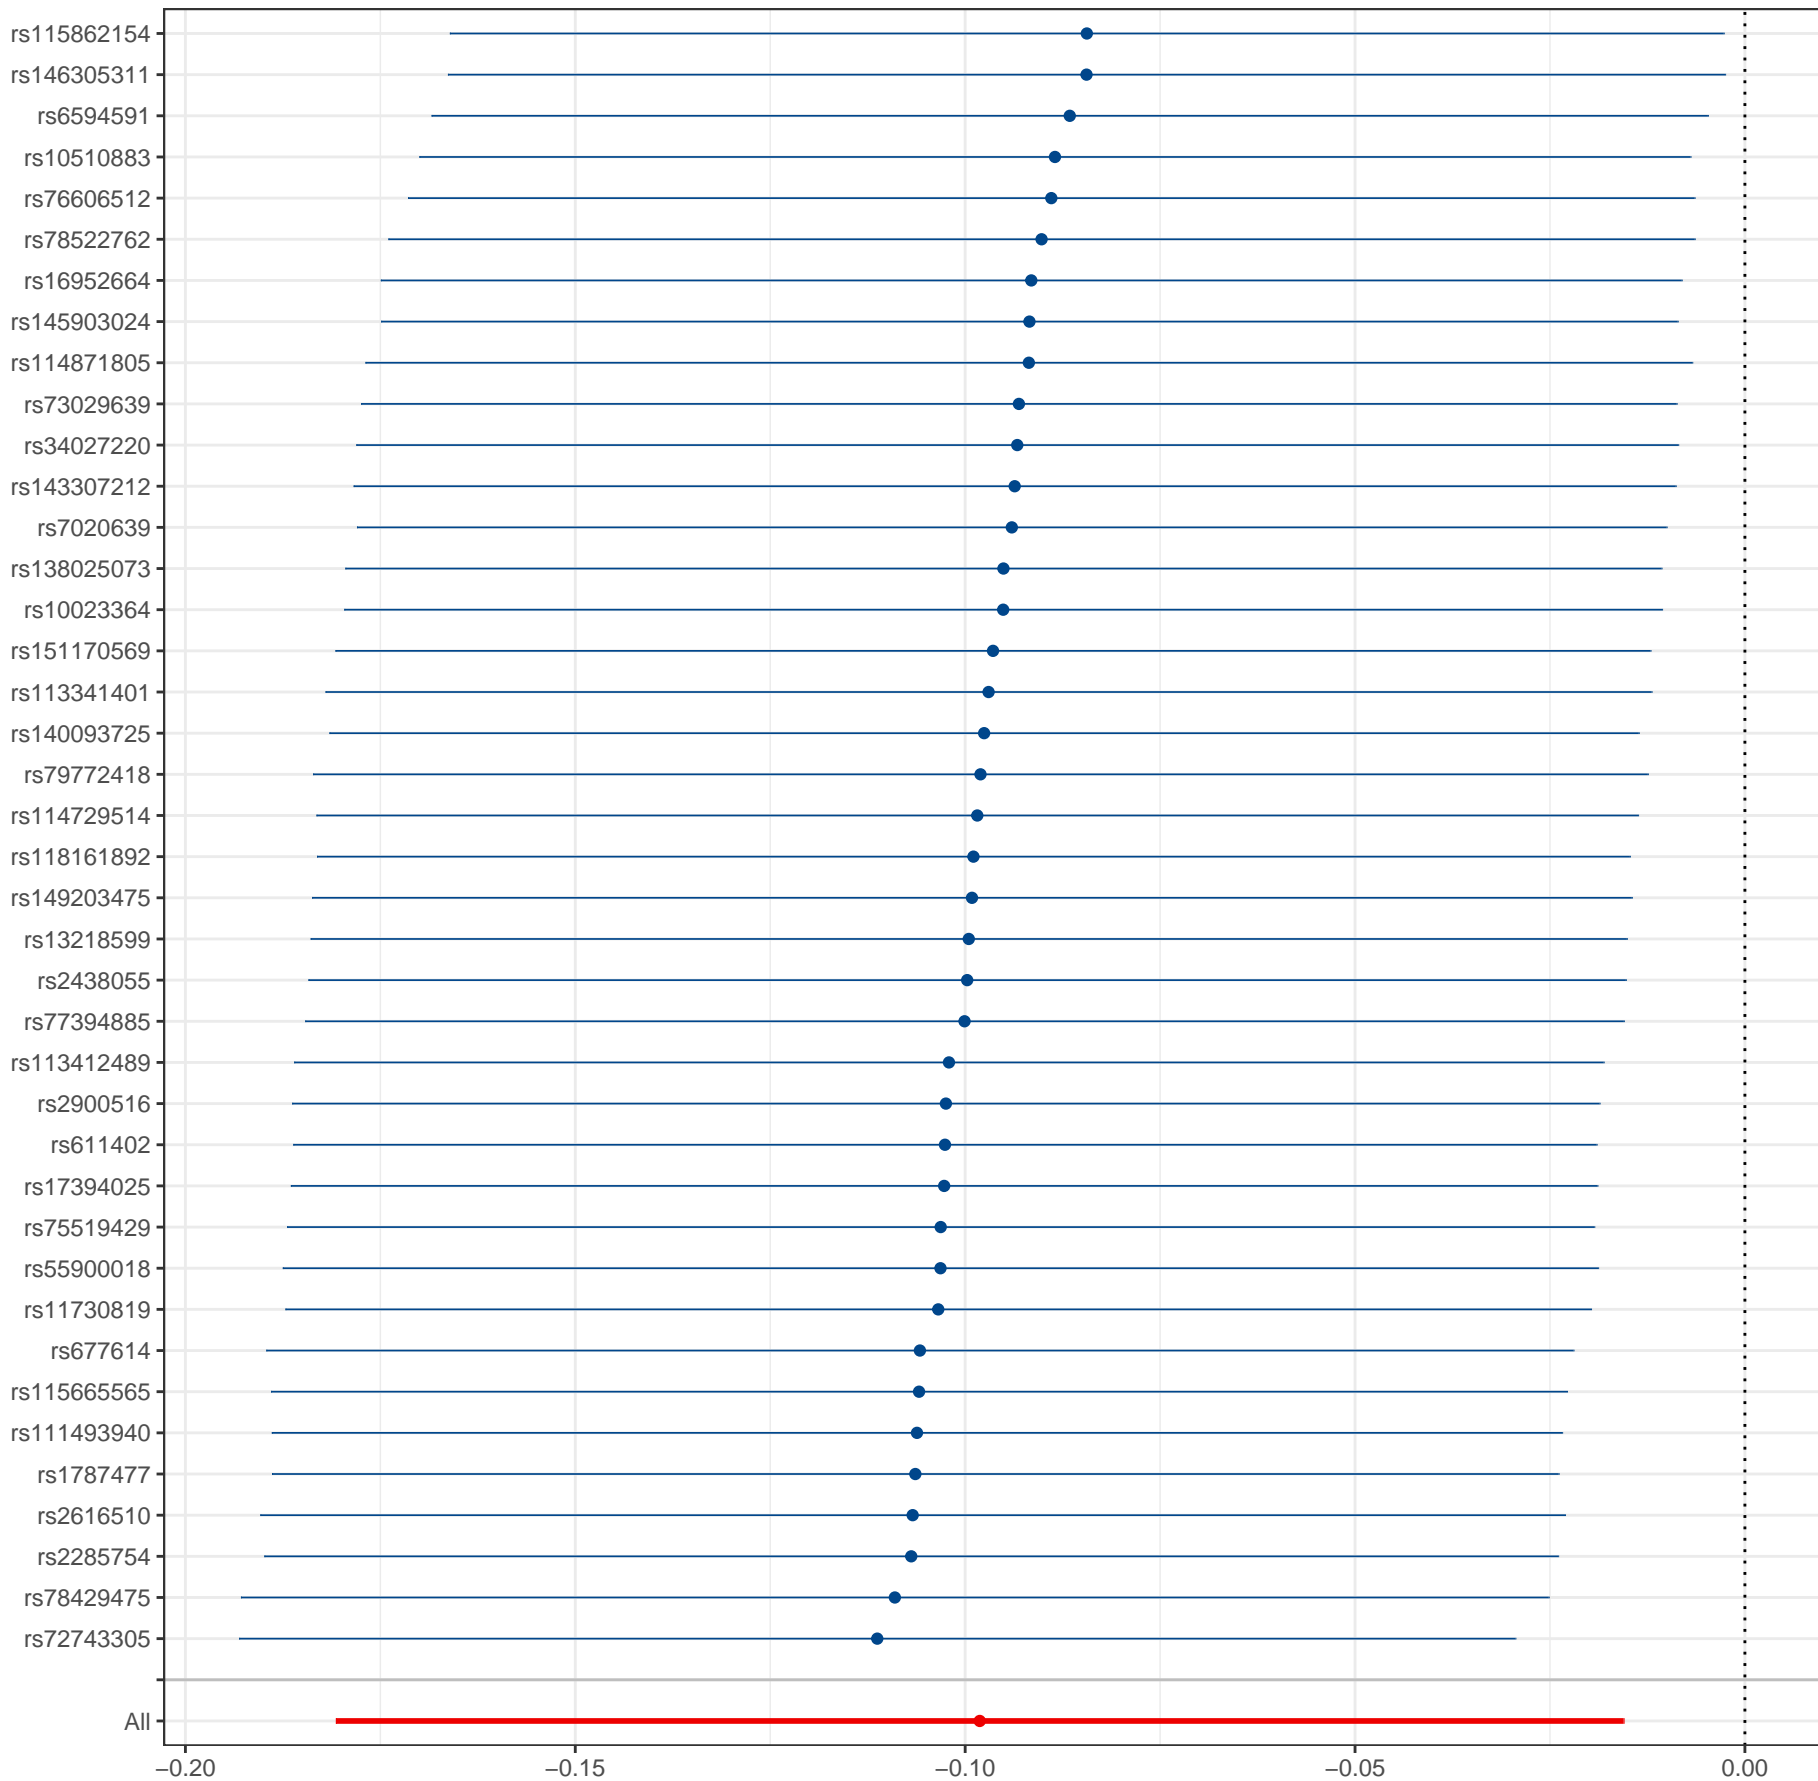

MR leave-one-out sensitivity analysis for 'X-12411 levels' on 'Parkinson's disease || id:ieu-b-7'



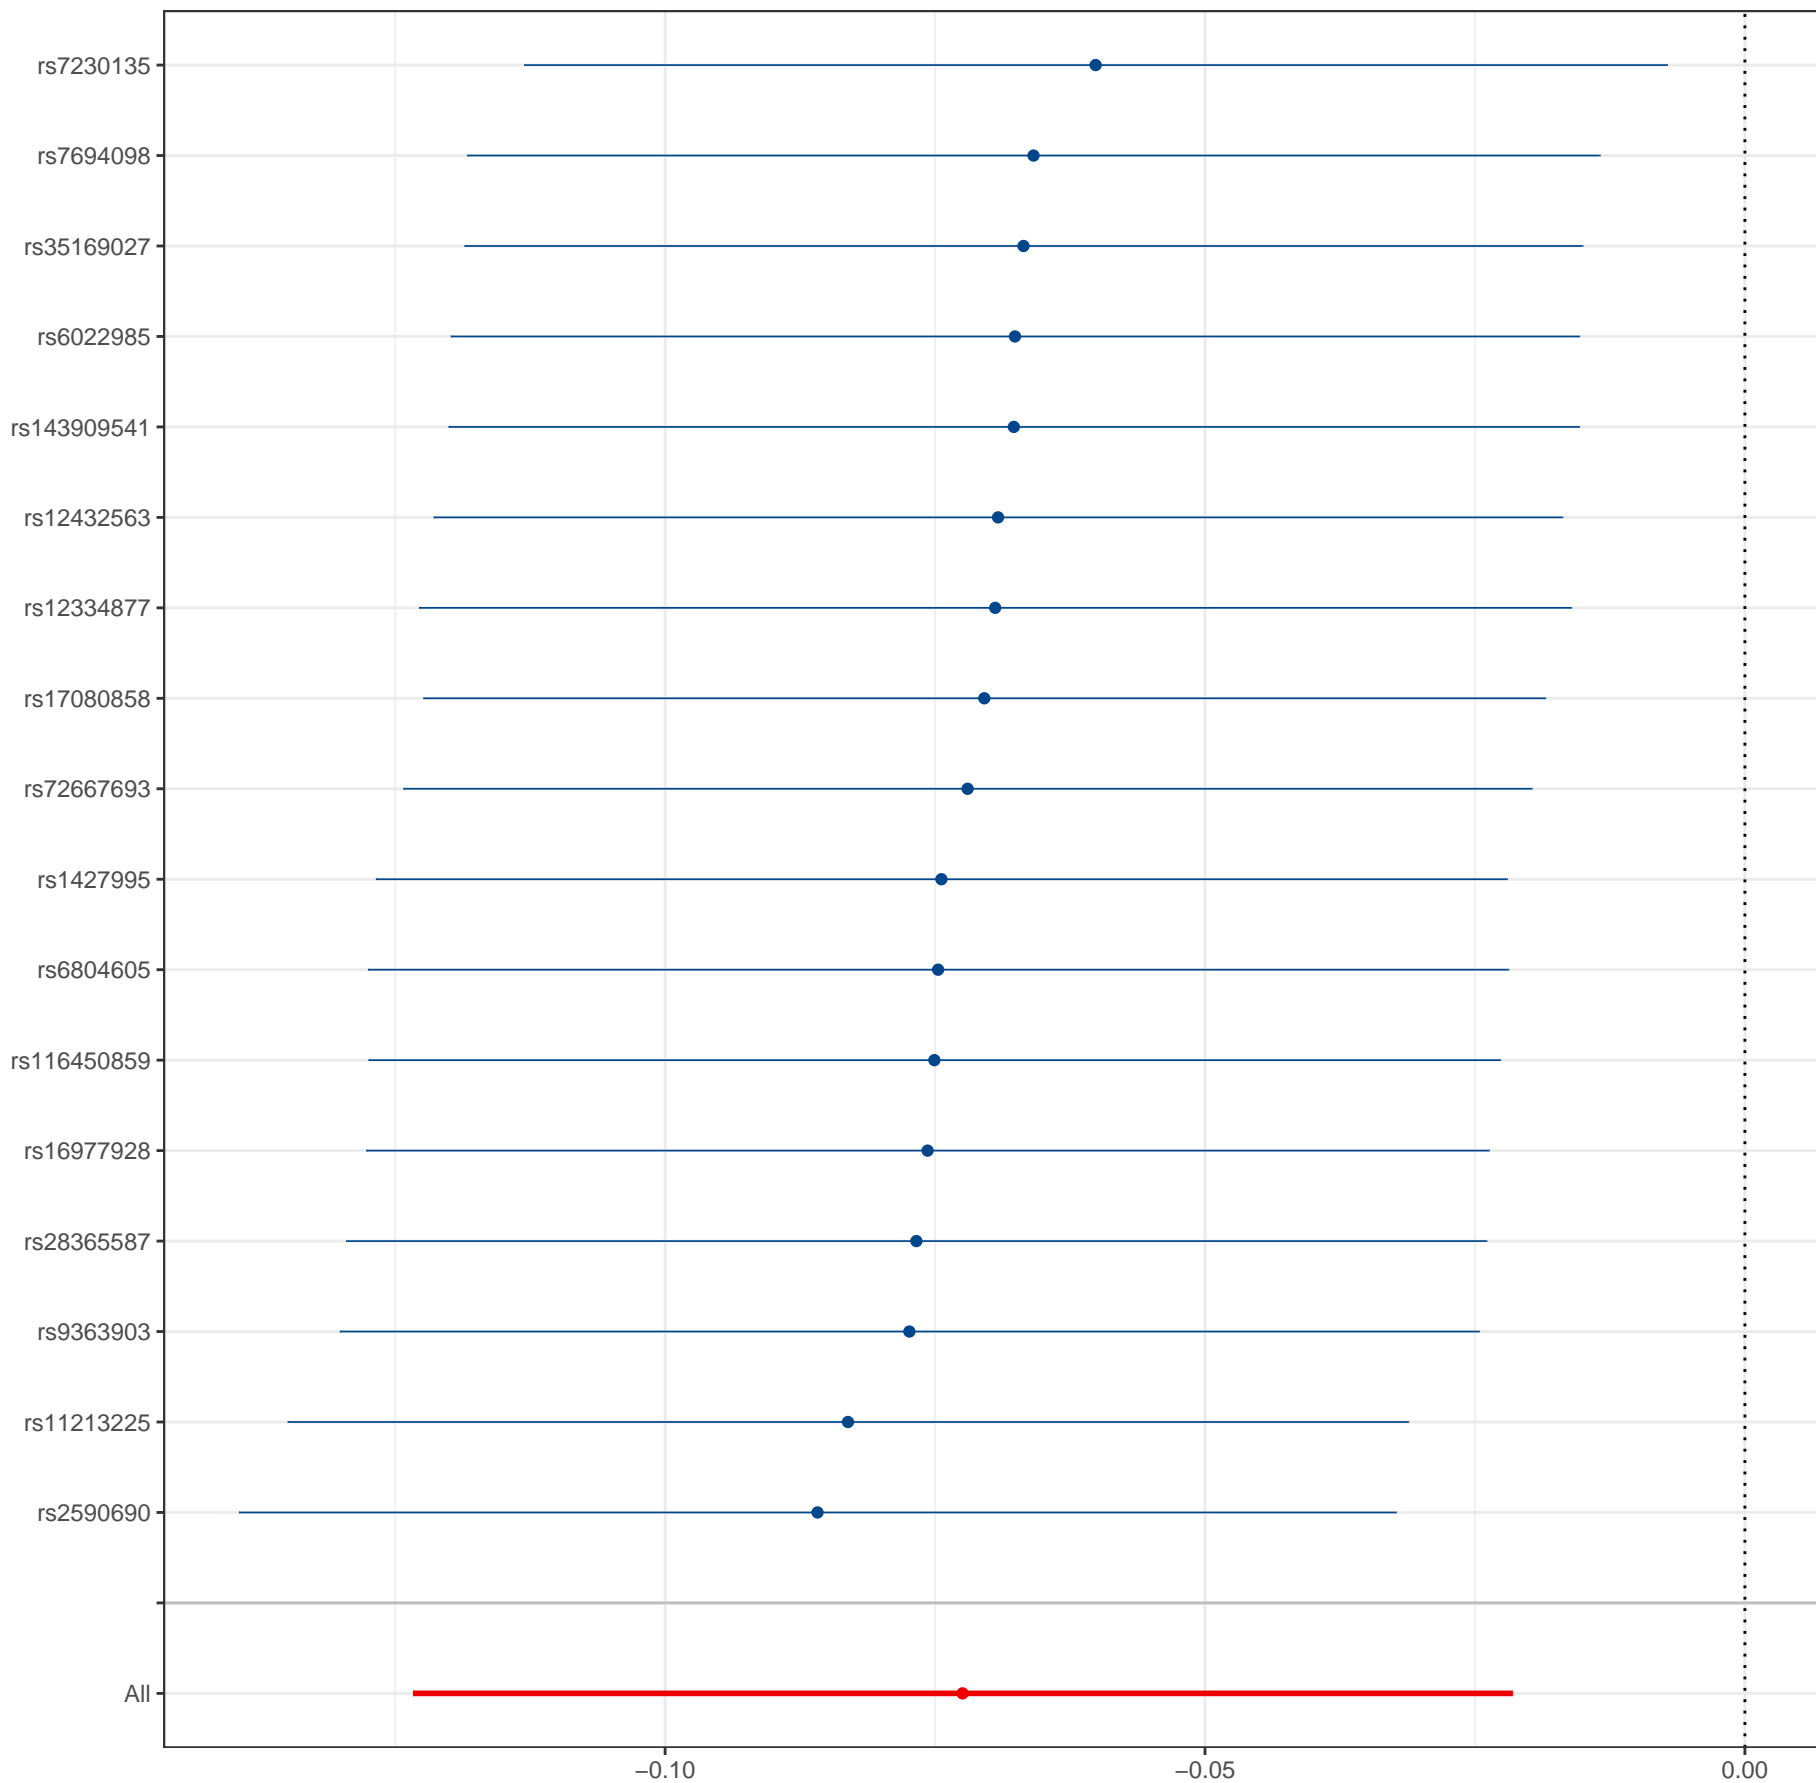

MR leave-one-out sensitivity analysis for 'X-23587 levels' on 'Parkinson's disease || id:ieu-b-7'
