# Supplementary material for: Cerebrospinal Fluid and Plasma Metabolites with Parkinson’s Disease: A Mendelian Randomization Study
Source: bioRxiv or medRxiv preprint supplement (doi:10.1101/2024.07.19.24310687), 2024-07-19
Supplement: Supplementary file [file media-2.pdf]

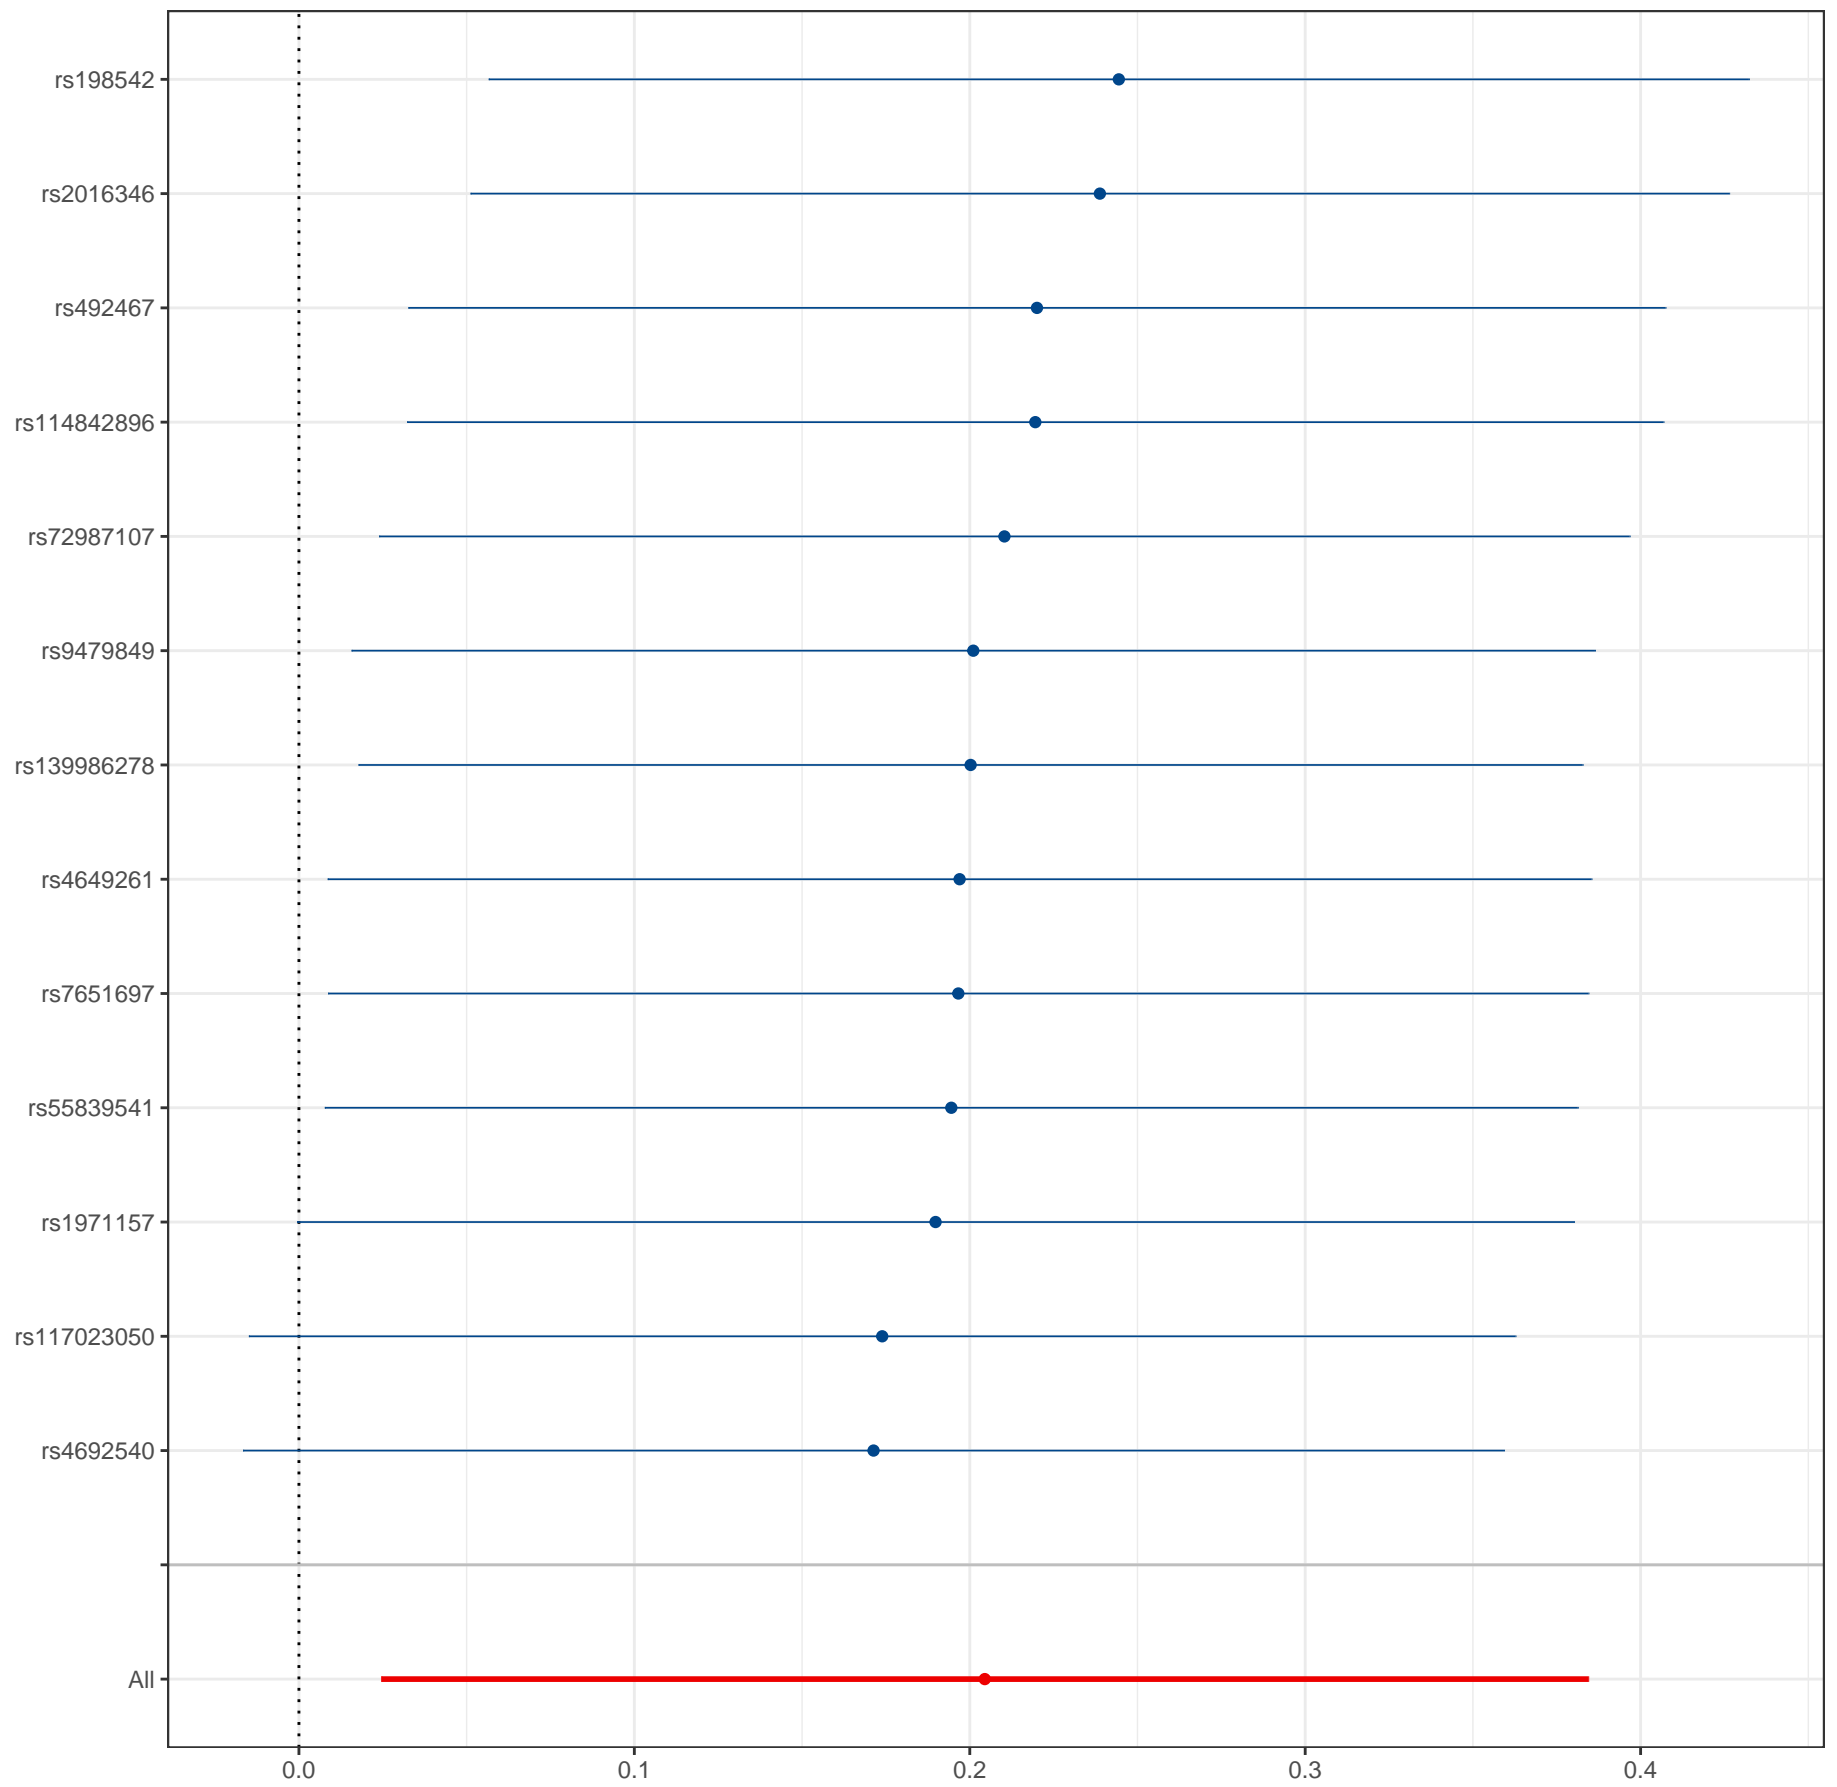

MR leave-one-out sensitivity analysis for '3-indoxyl sulfate levels' on 'Parkinson's disease || id:ieu-b-7'

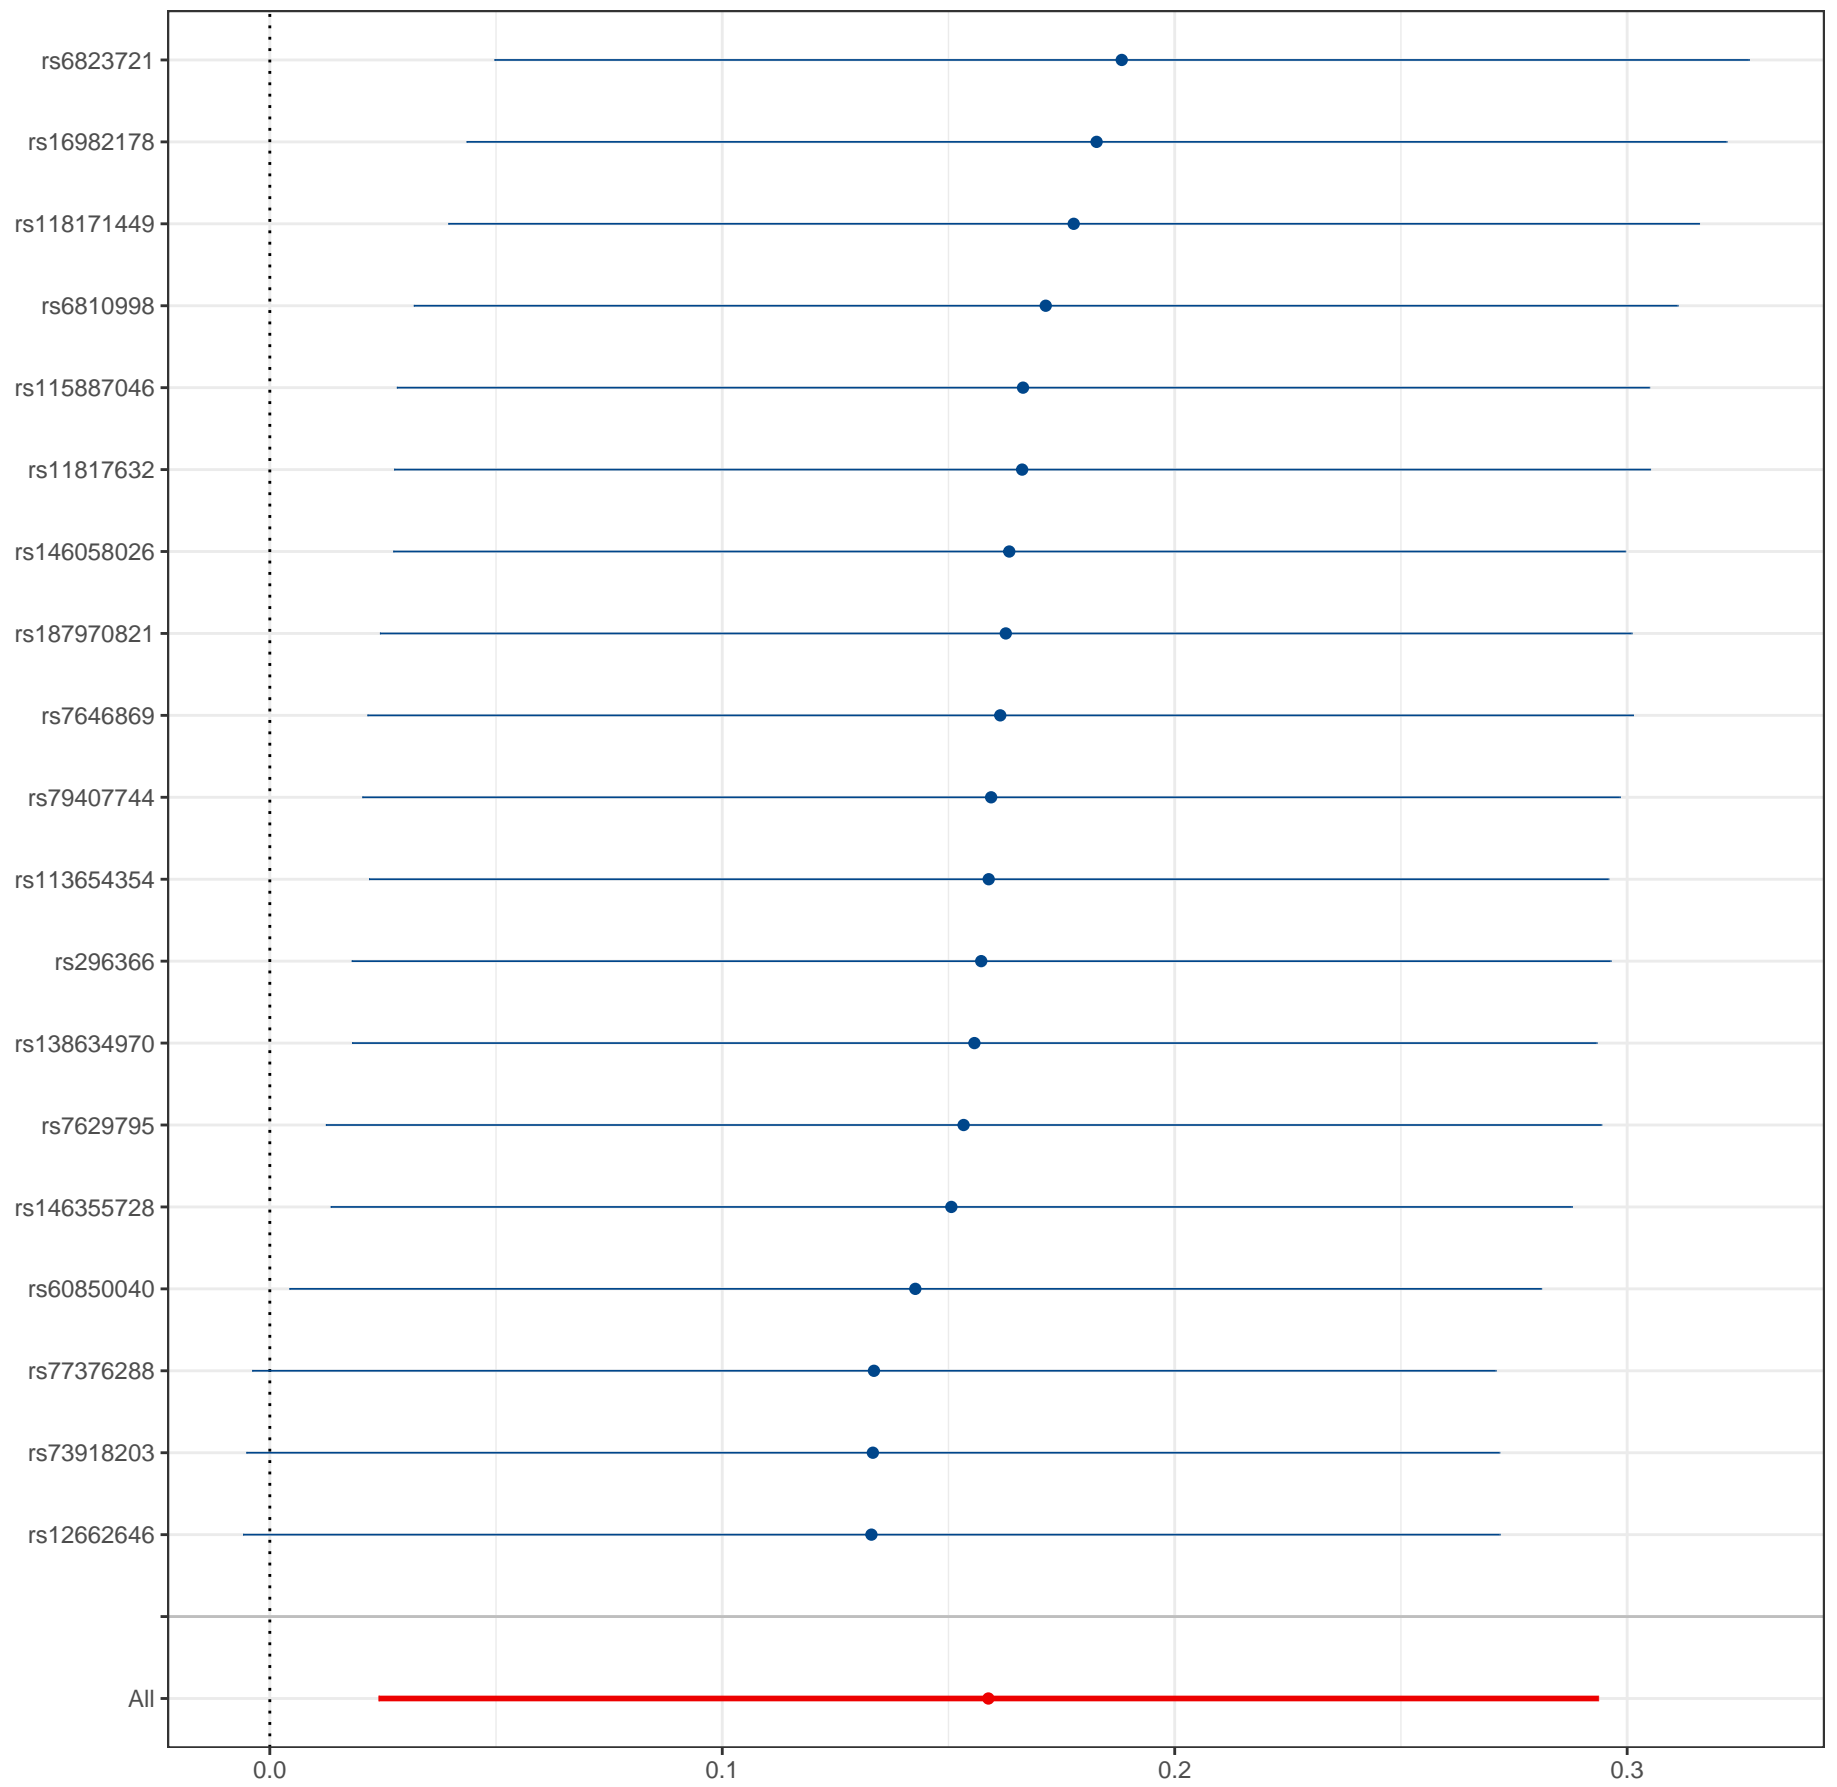

MR leave-one-out sensitivity analysis for 'Glycolithocholate levels' on 'Parkinson's disease || id:ieu-b-7'

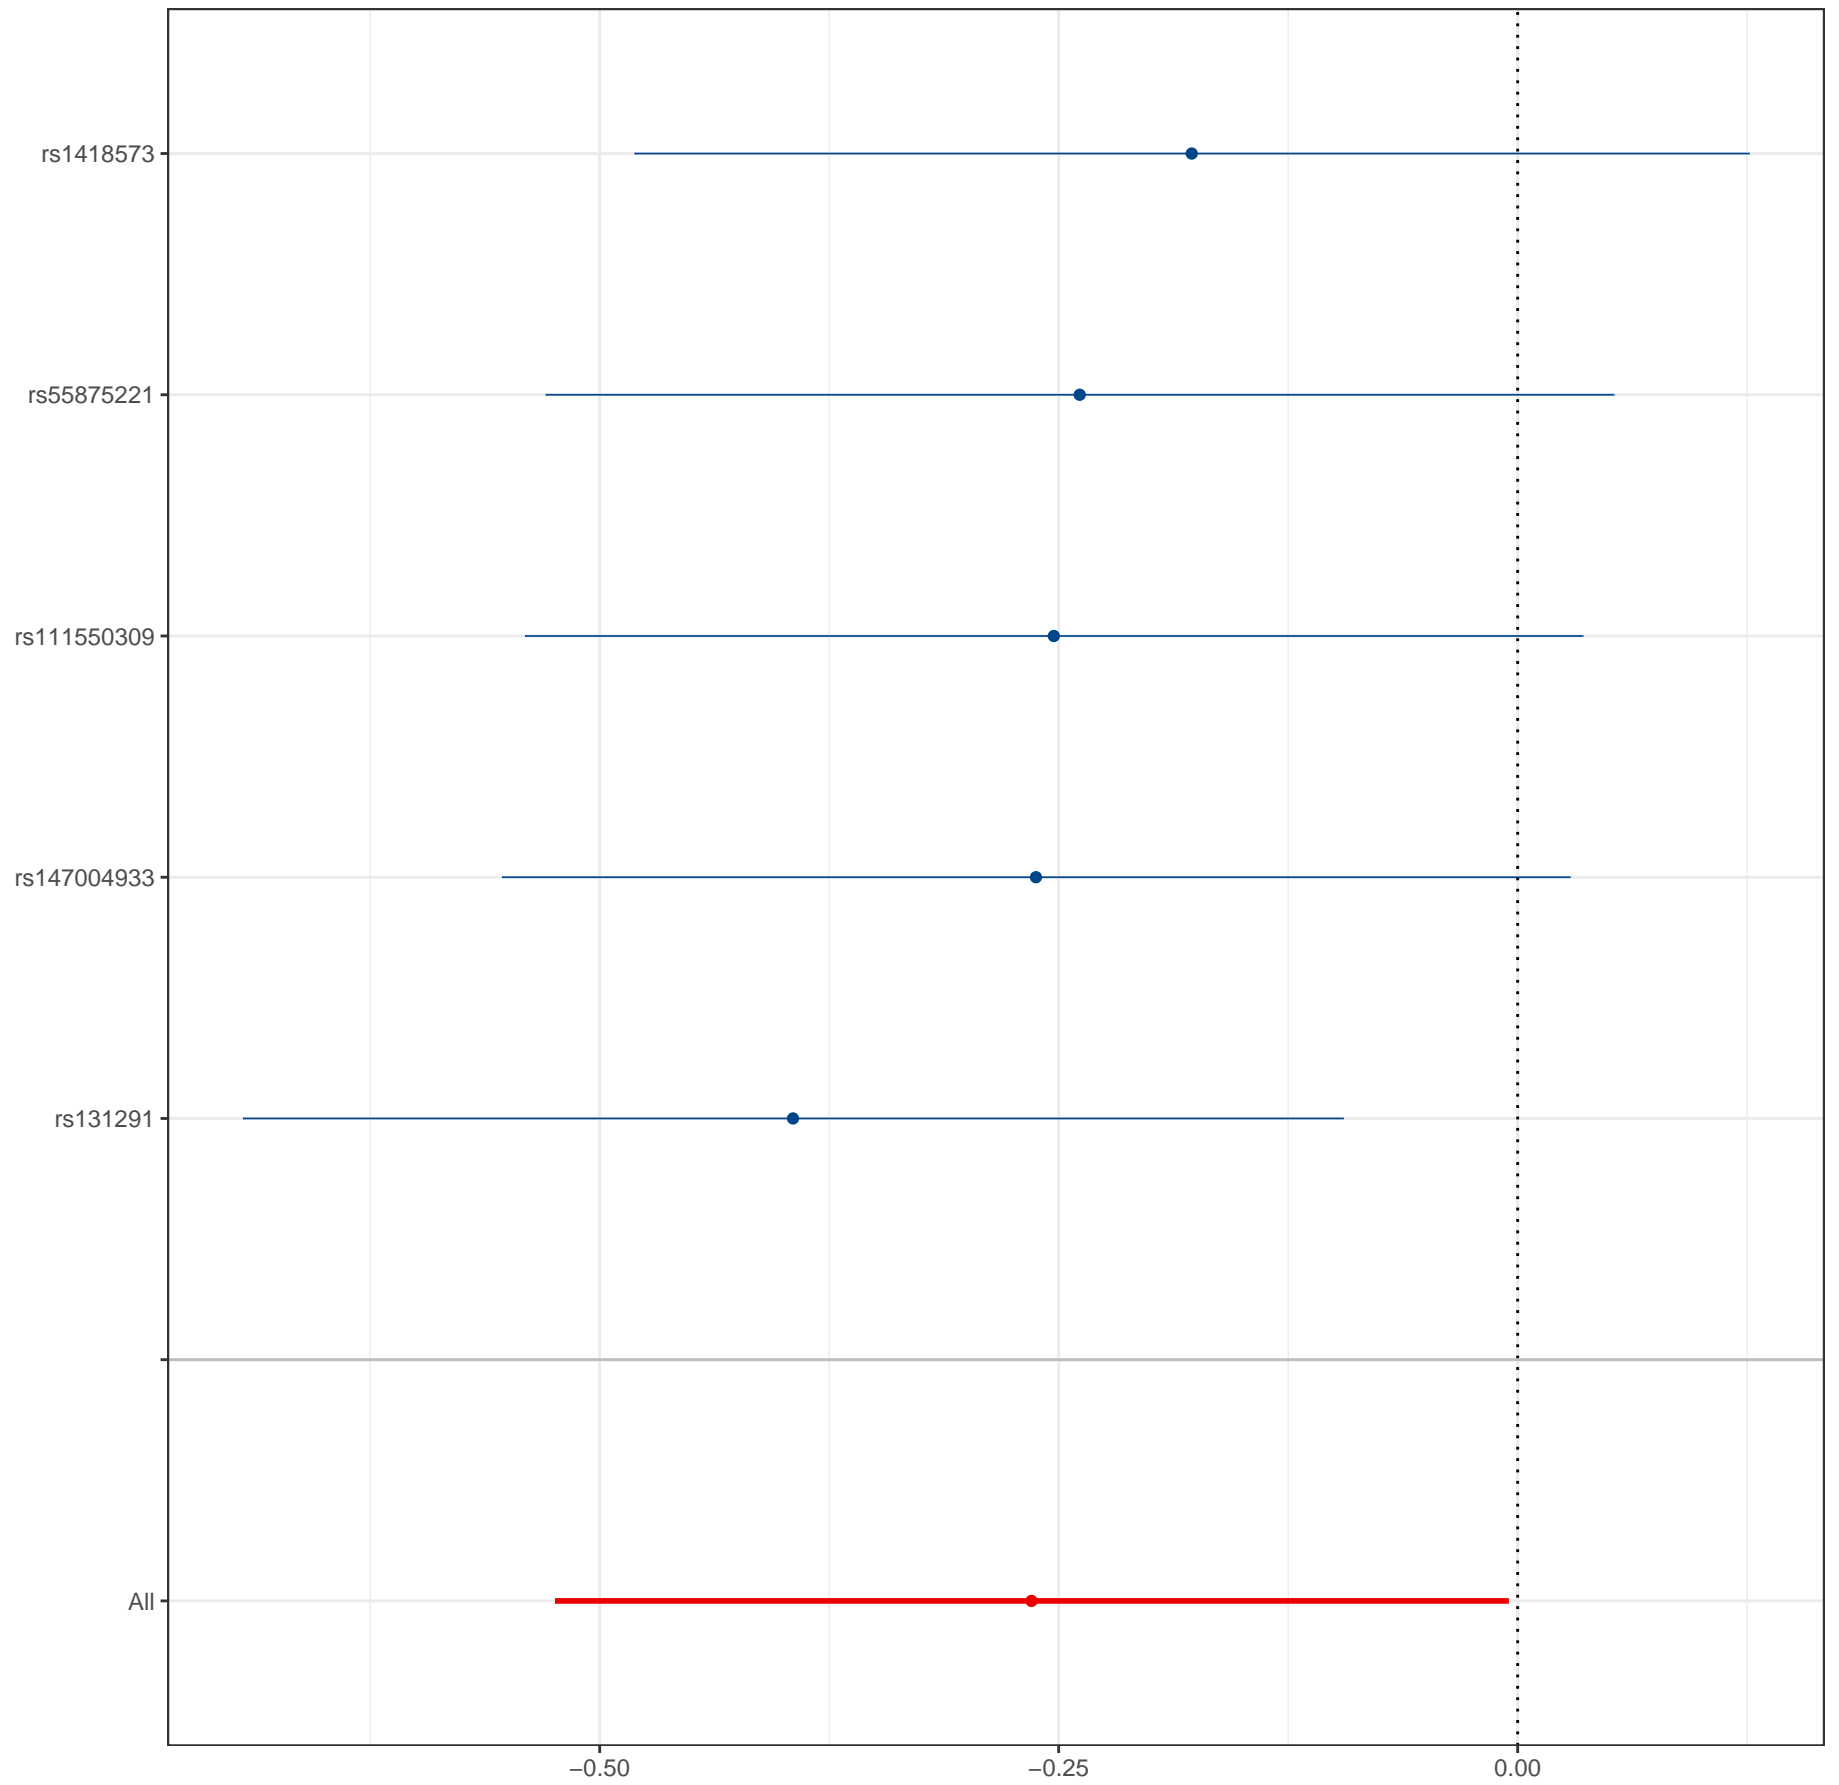

MR leave-one-out sensitivity analysis for 'Adrenate (22:4n6) levels' on 'Parkinson's disease || id:ieu-b-7'

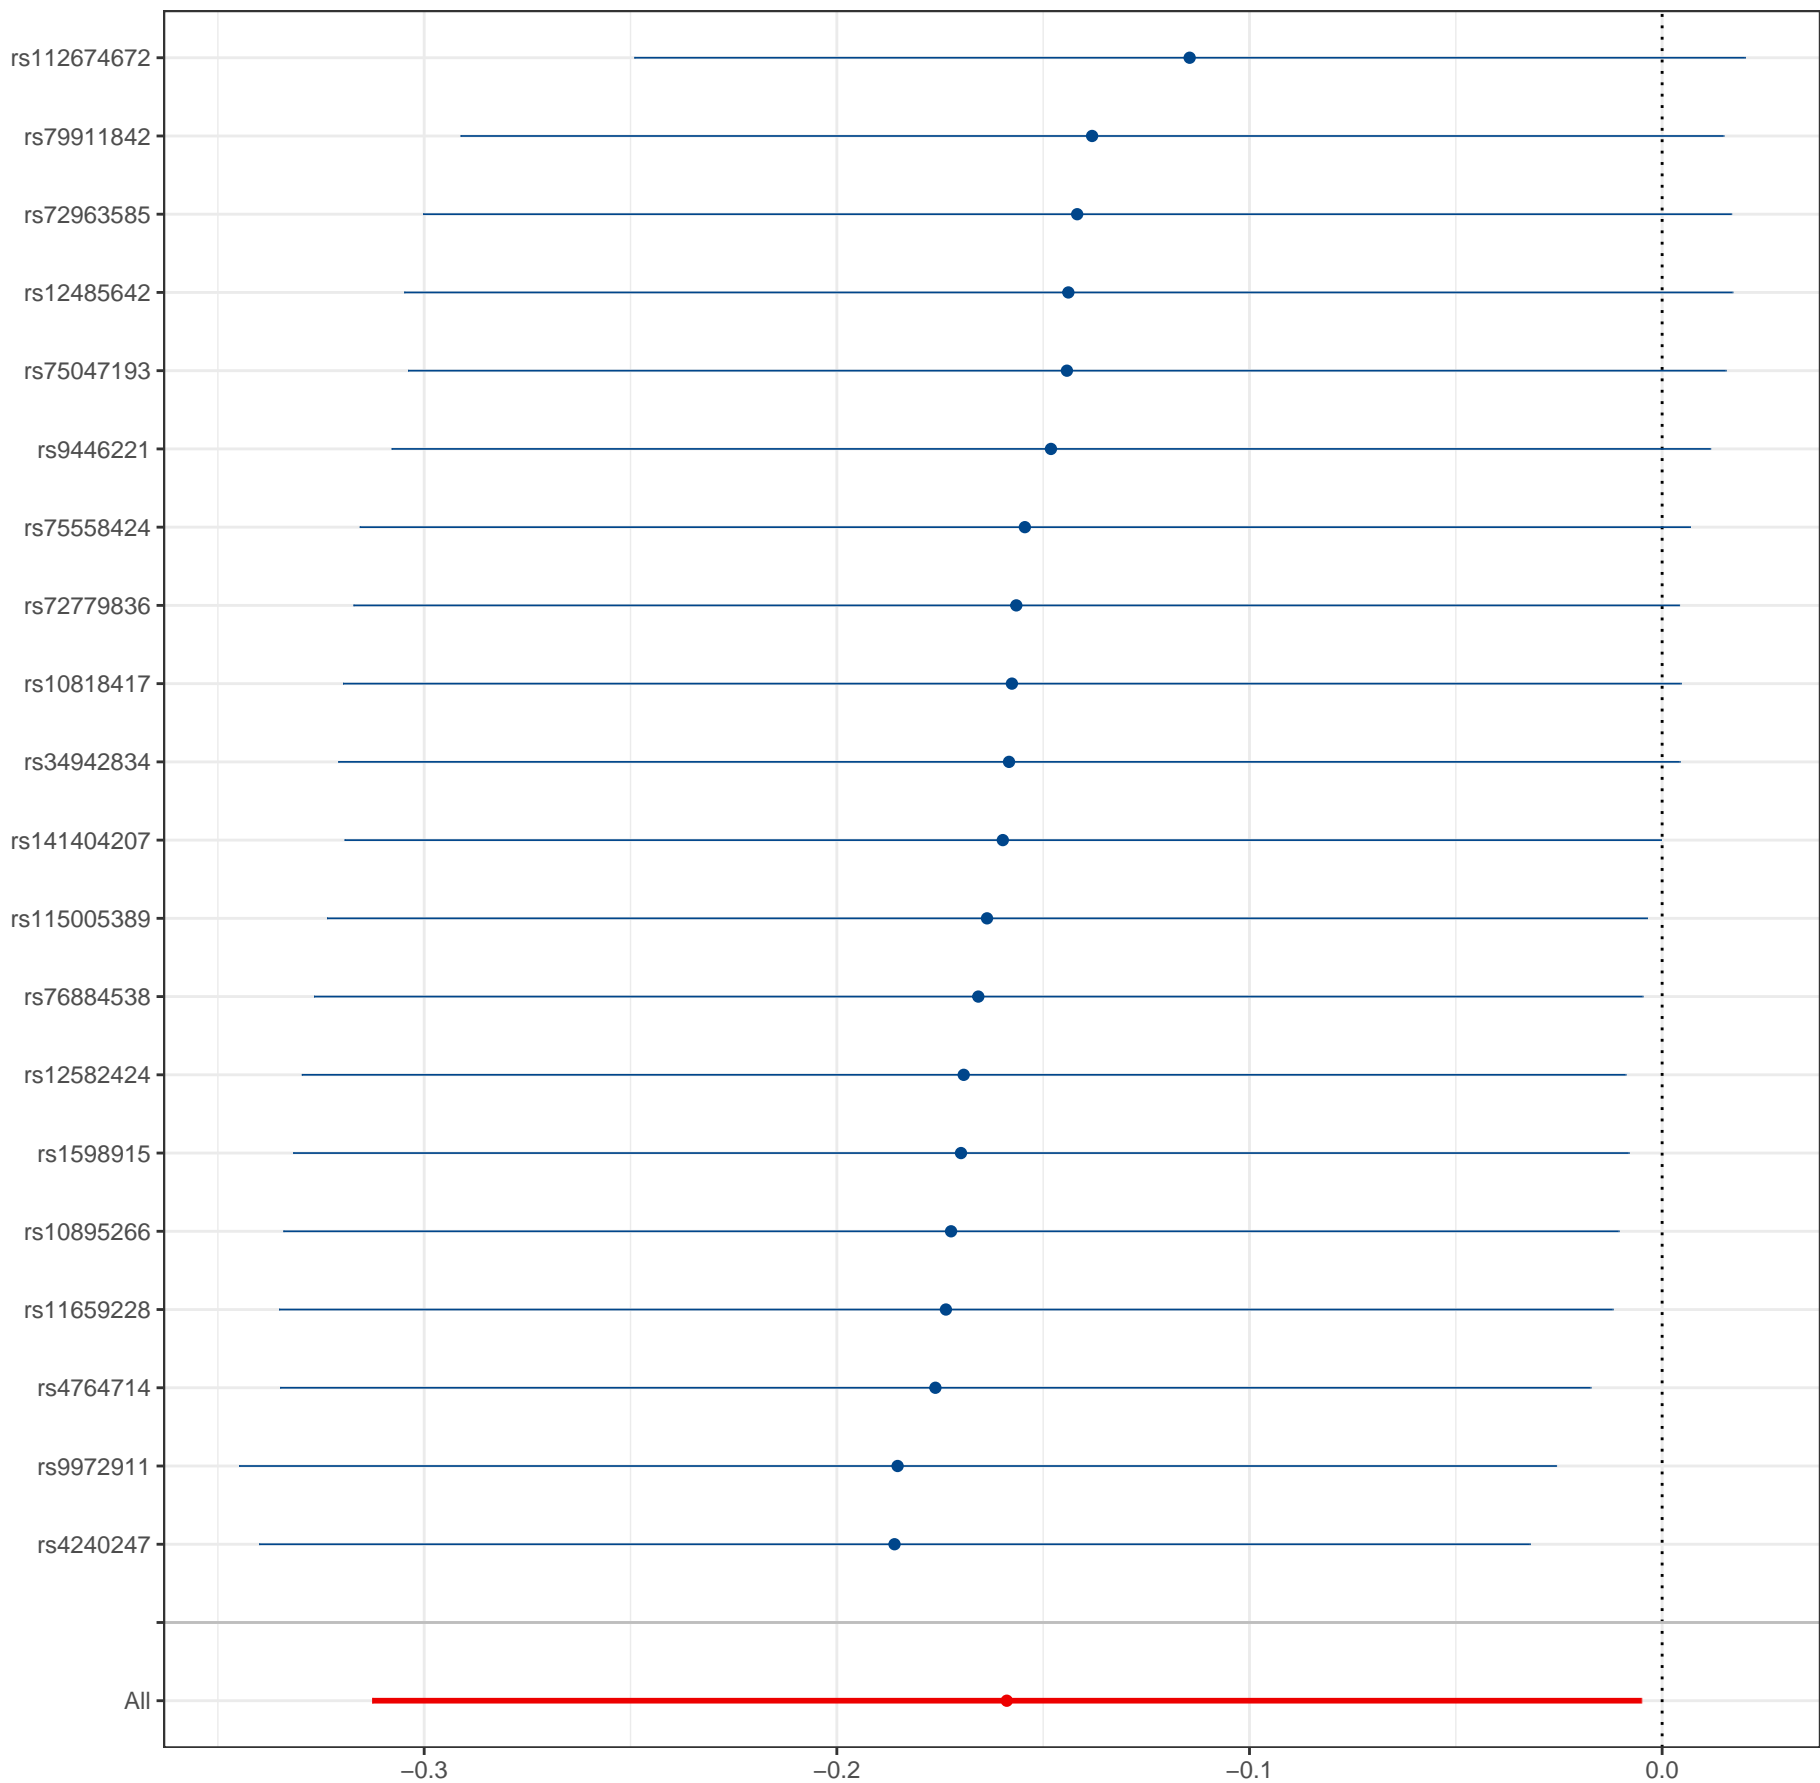

MR leave-one-out sensitivity analysis for 'N-acetyliso-leucine levels' on 'Parkinson's disease || id:ieu-b-7'

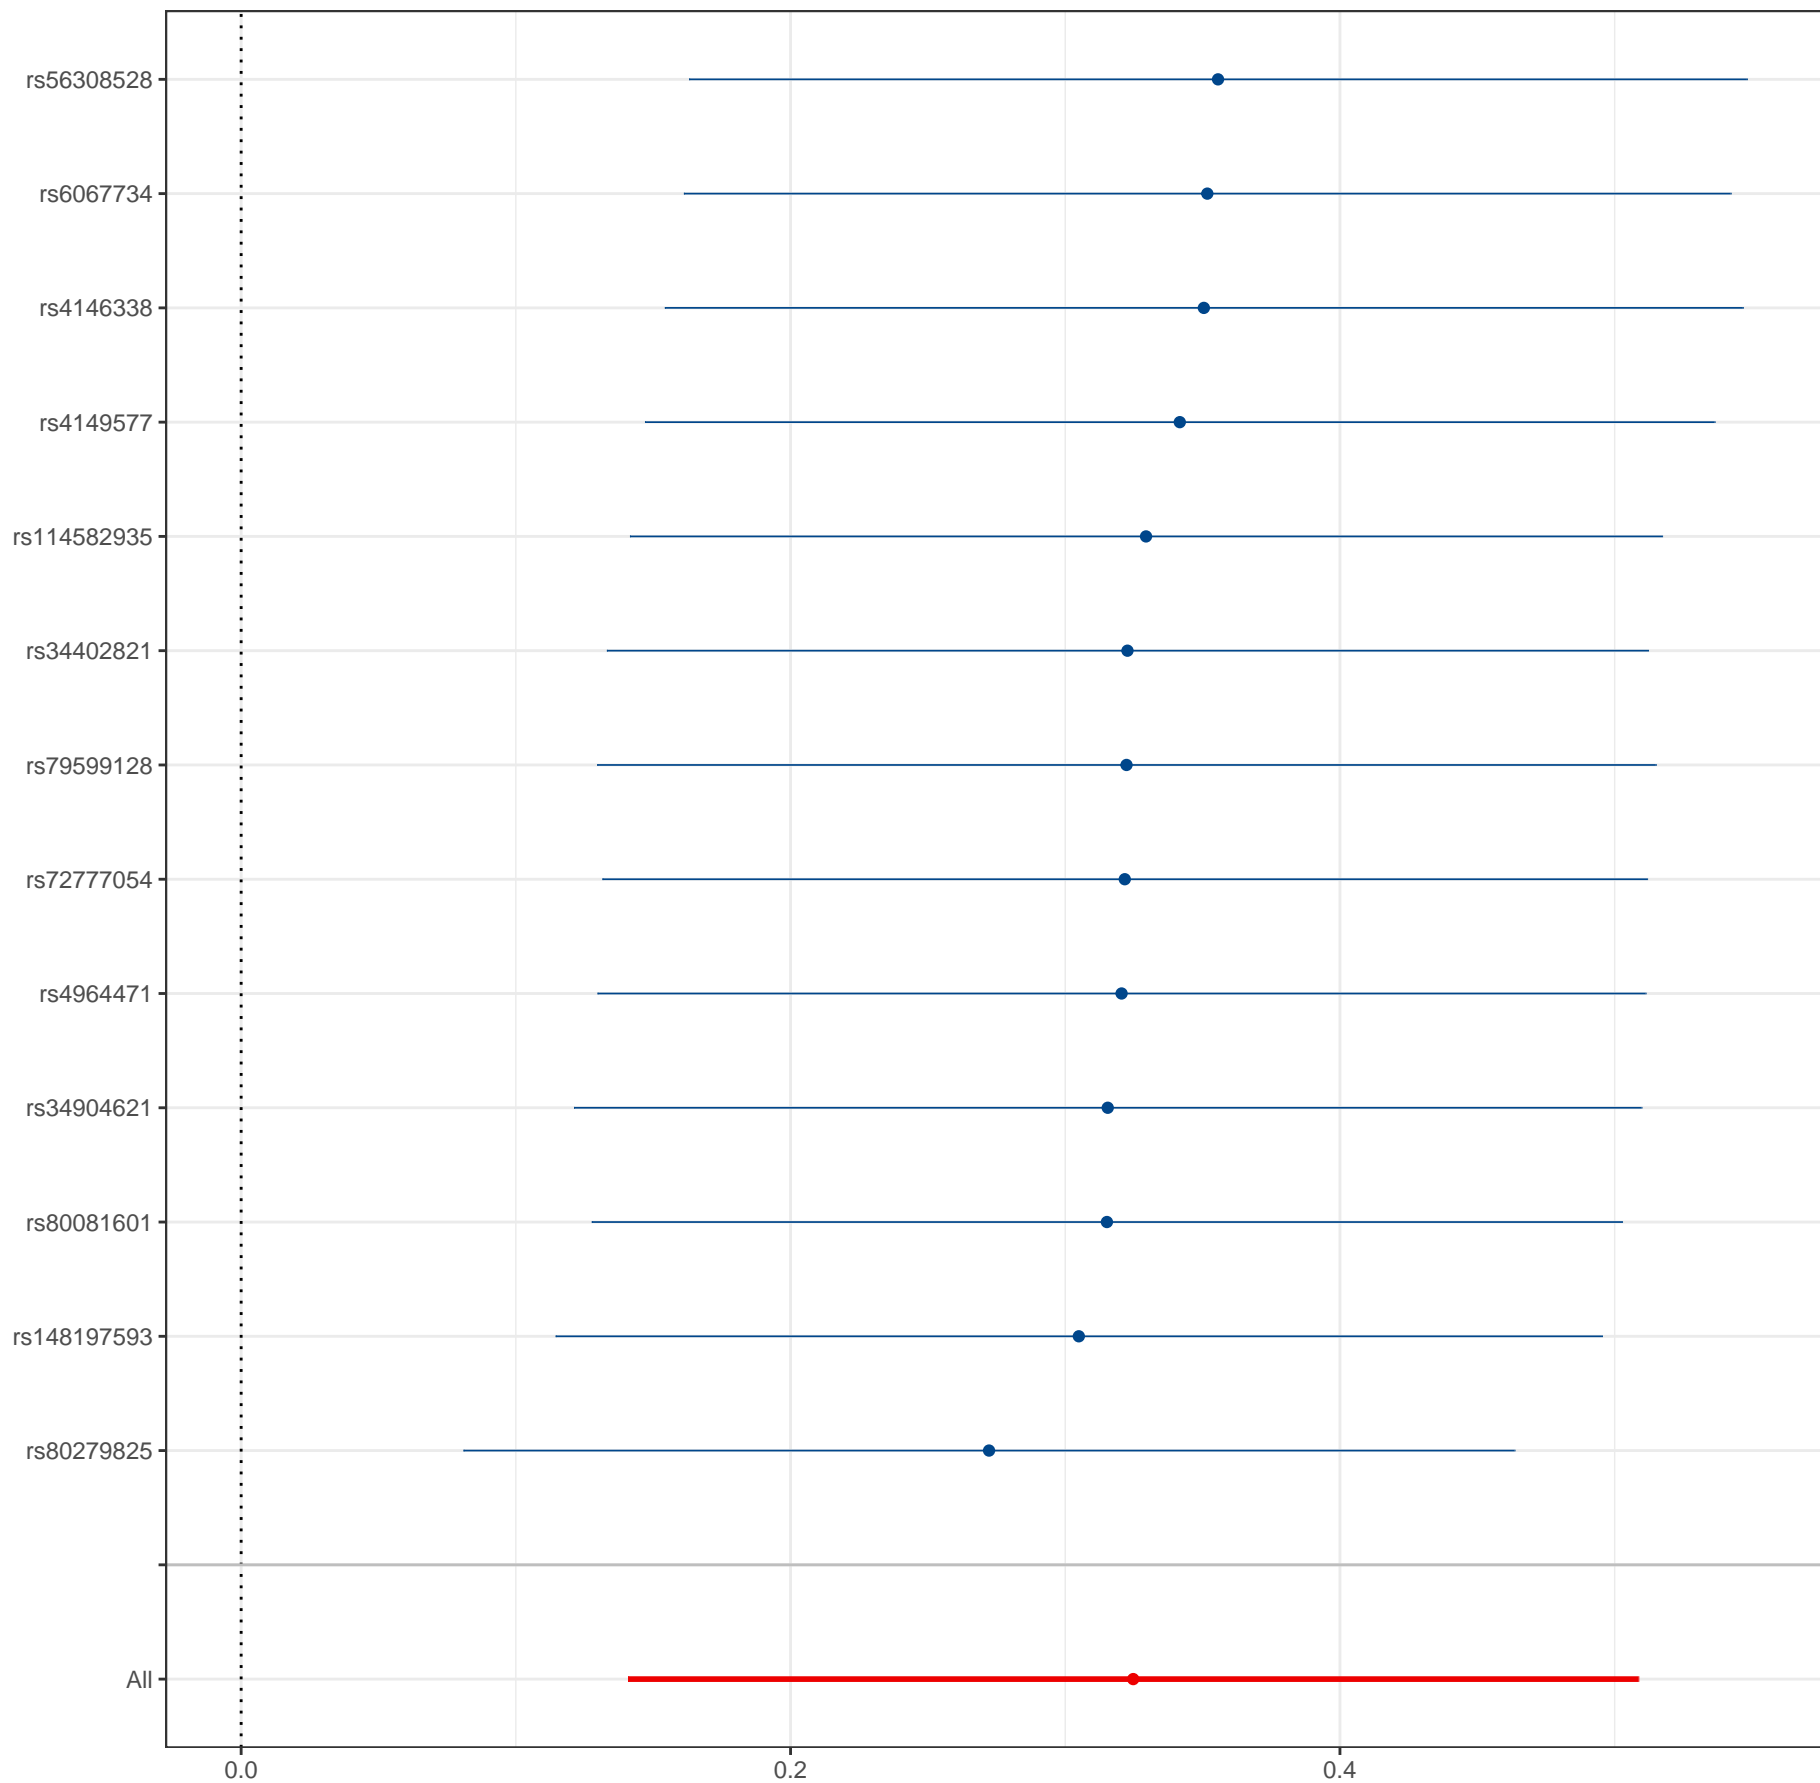

MR leave-one-out sensitivity analysis for 'Carnitine C14 levels' on 'Parkinson's disease || id:ieu-b-7'

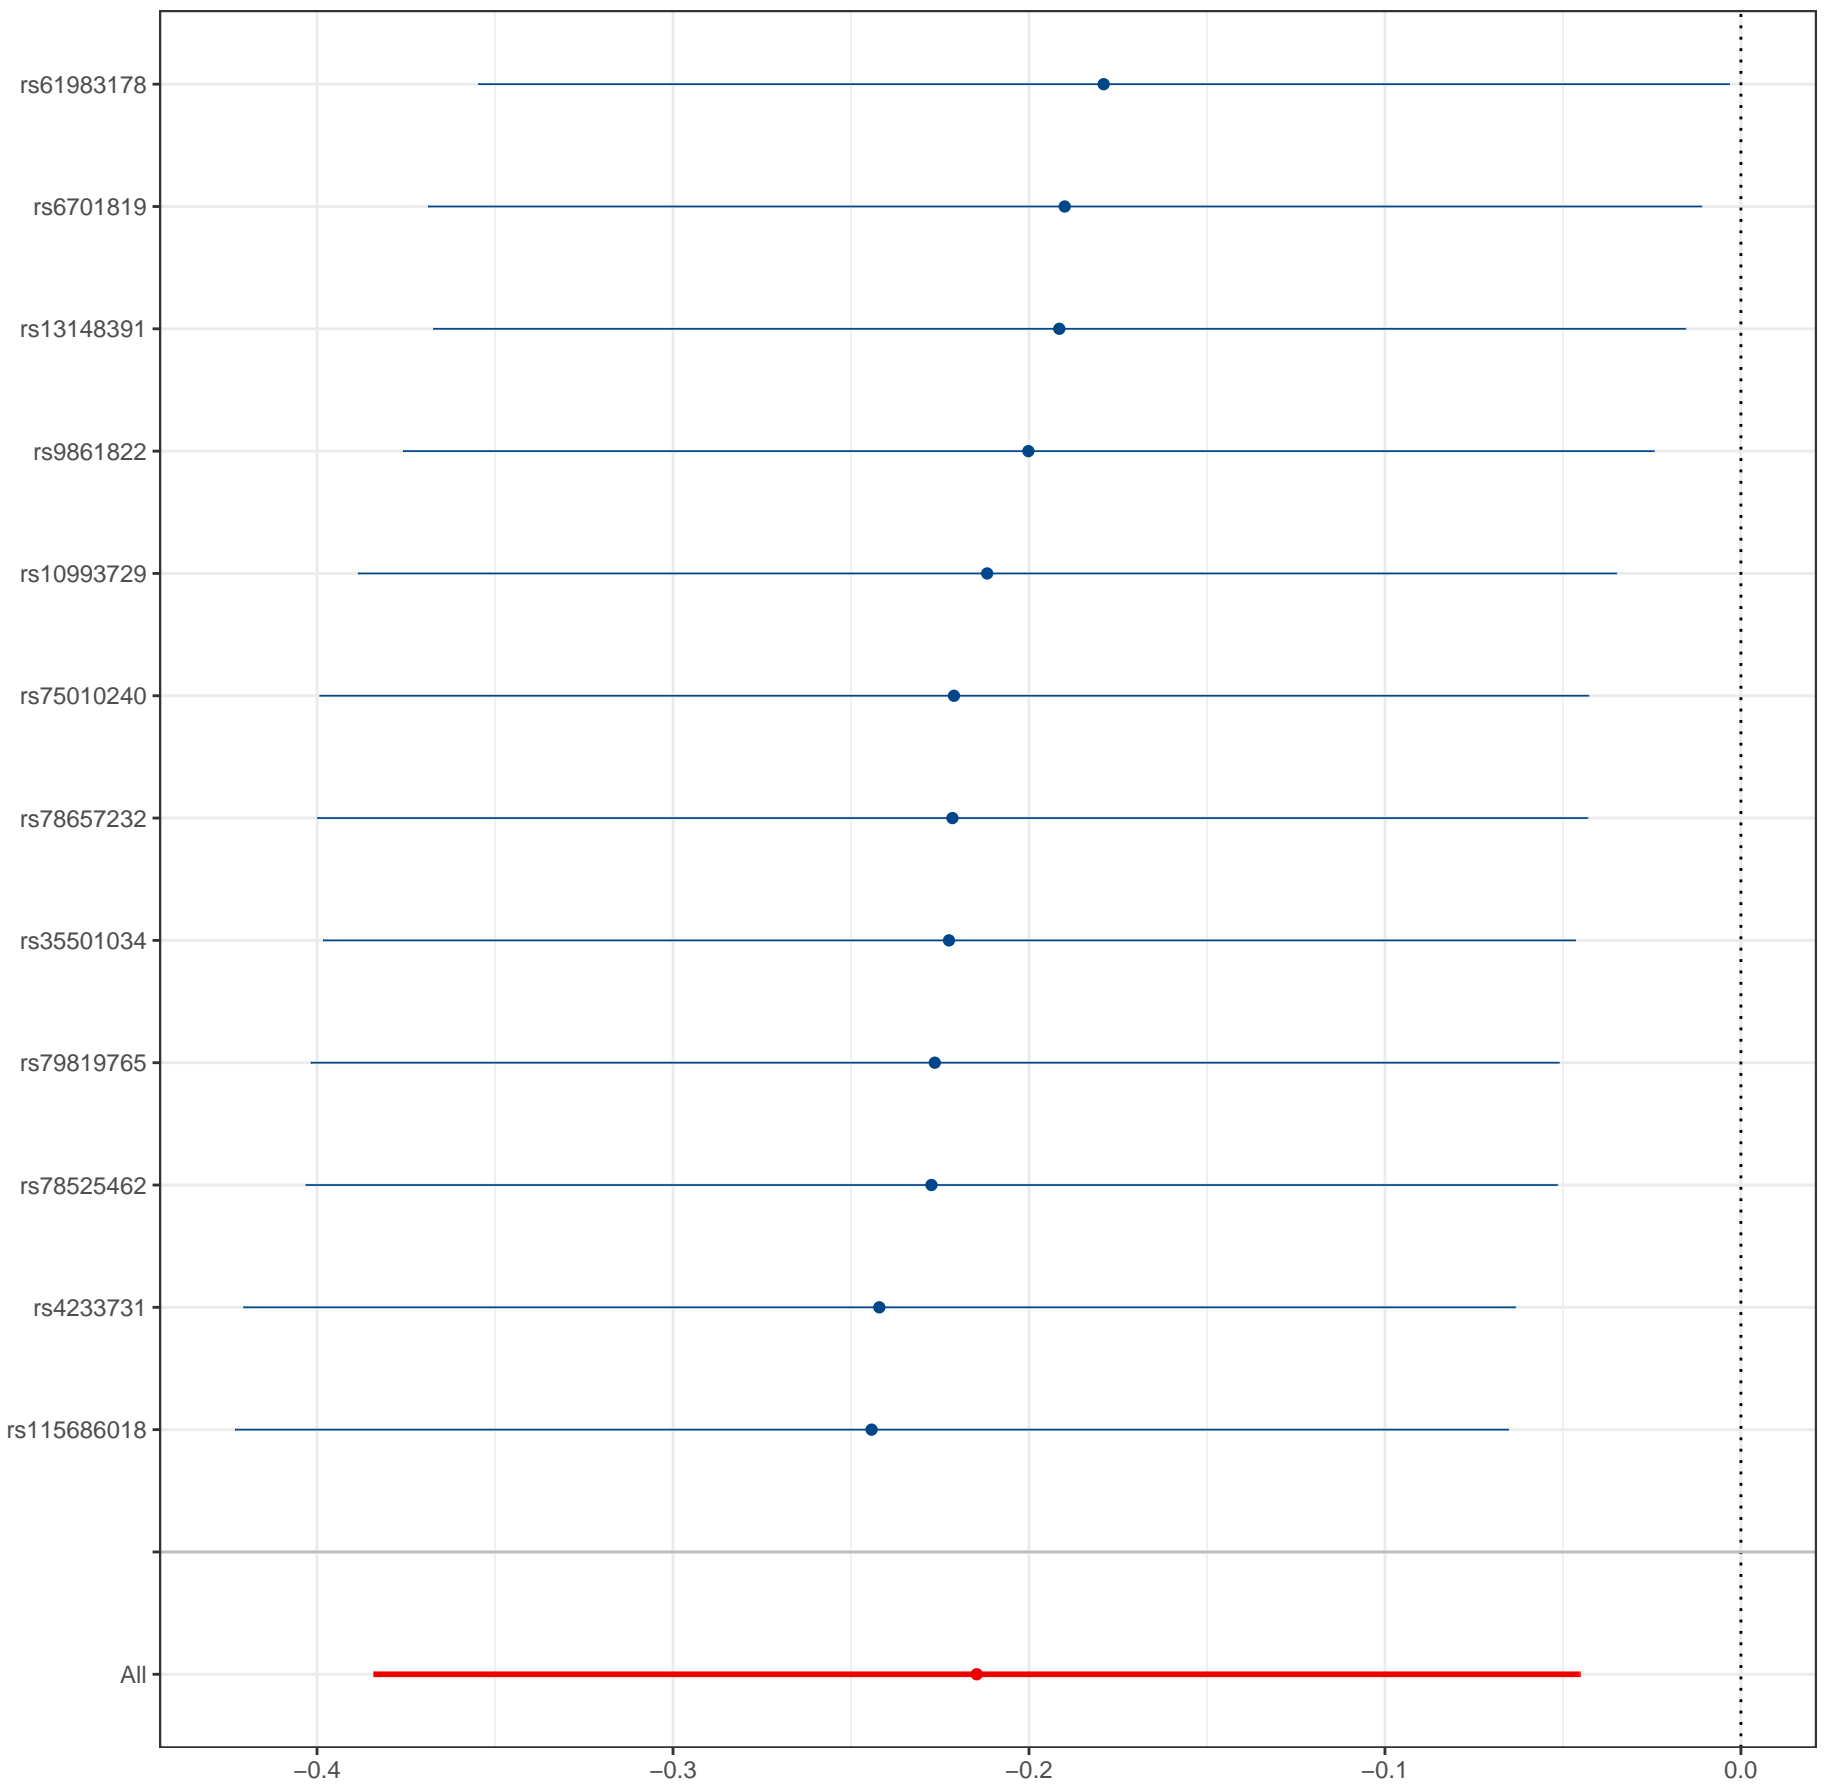

MR leave-one-out sensitivity analysis for 'Eicosenoate (20:1) levels' on 'Parkinson's disease || id:ieu-b-7'

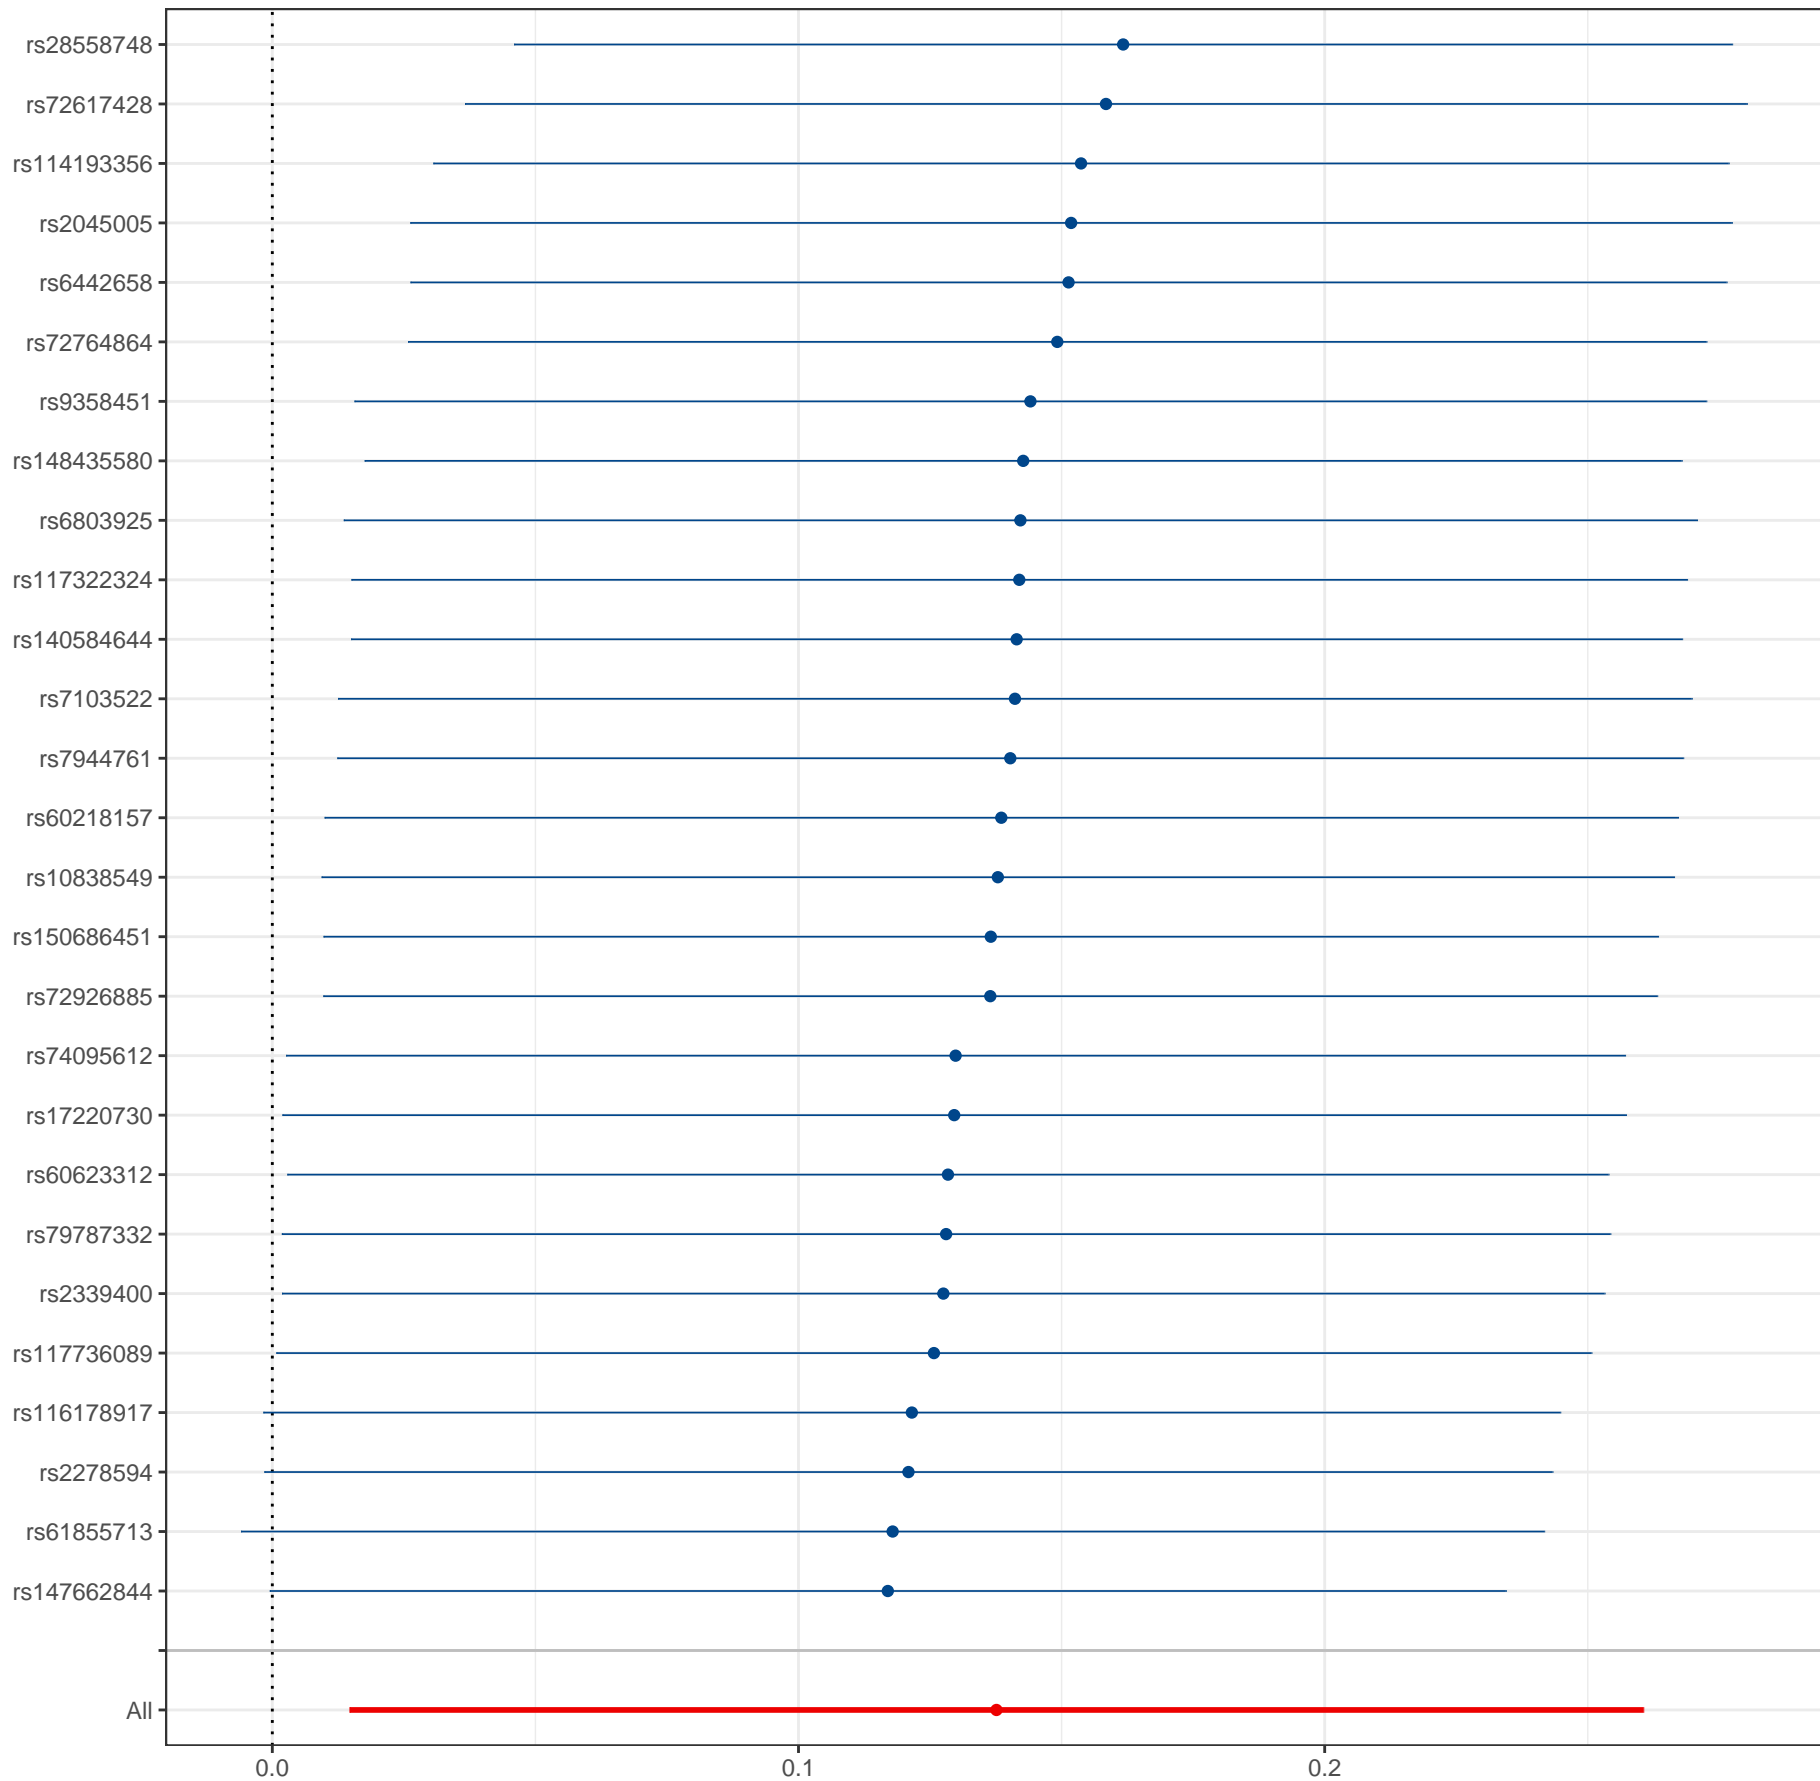

MR leave-one-out sensitivity analysis for 'Gamma-glutamylthreonine levels' on 'Parkinson's disease || id:ieu-b-7'

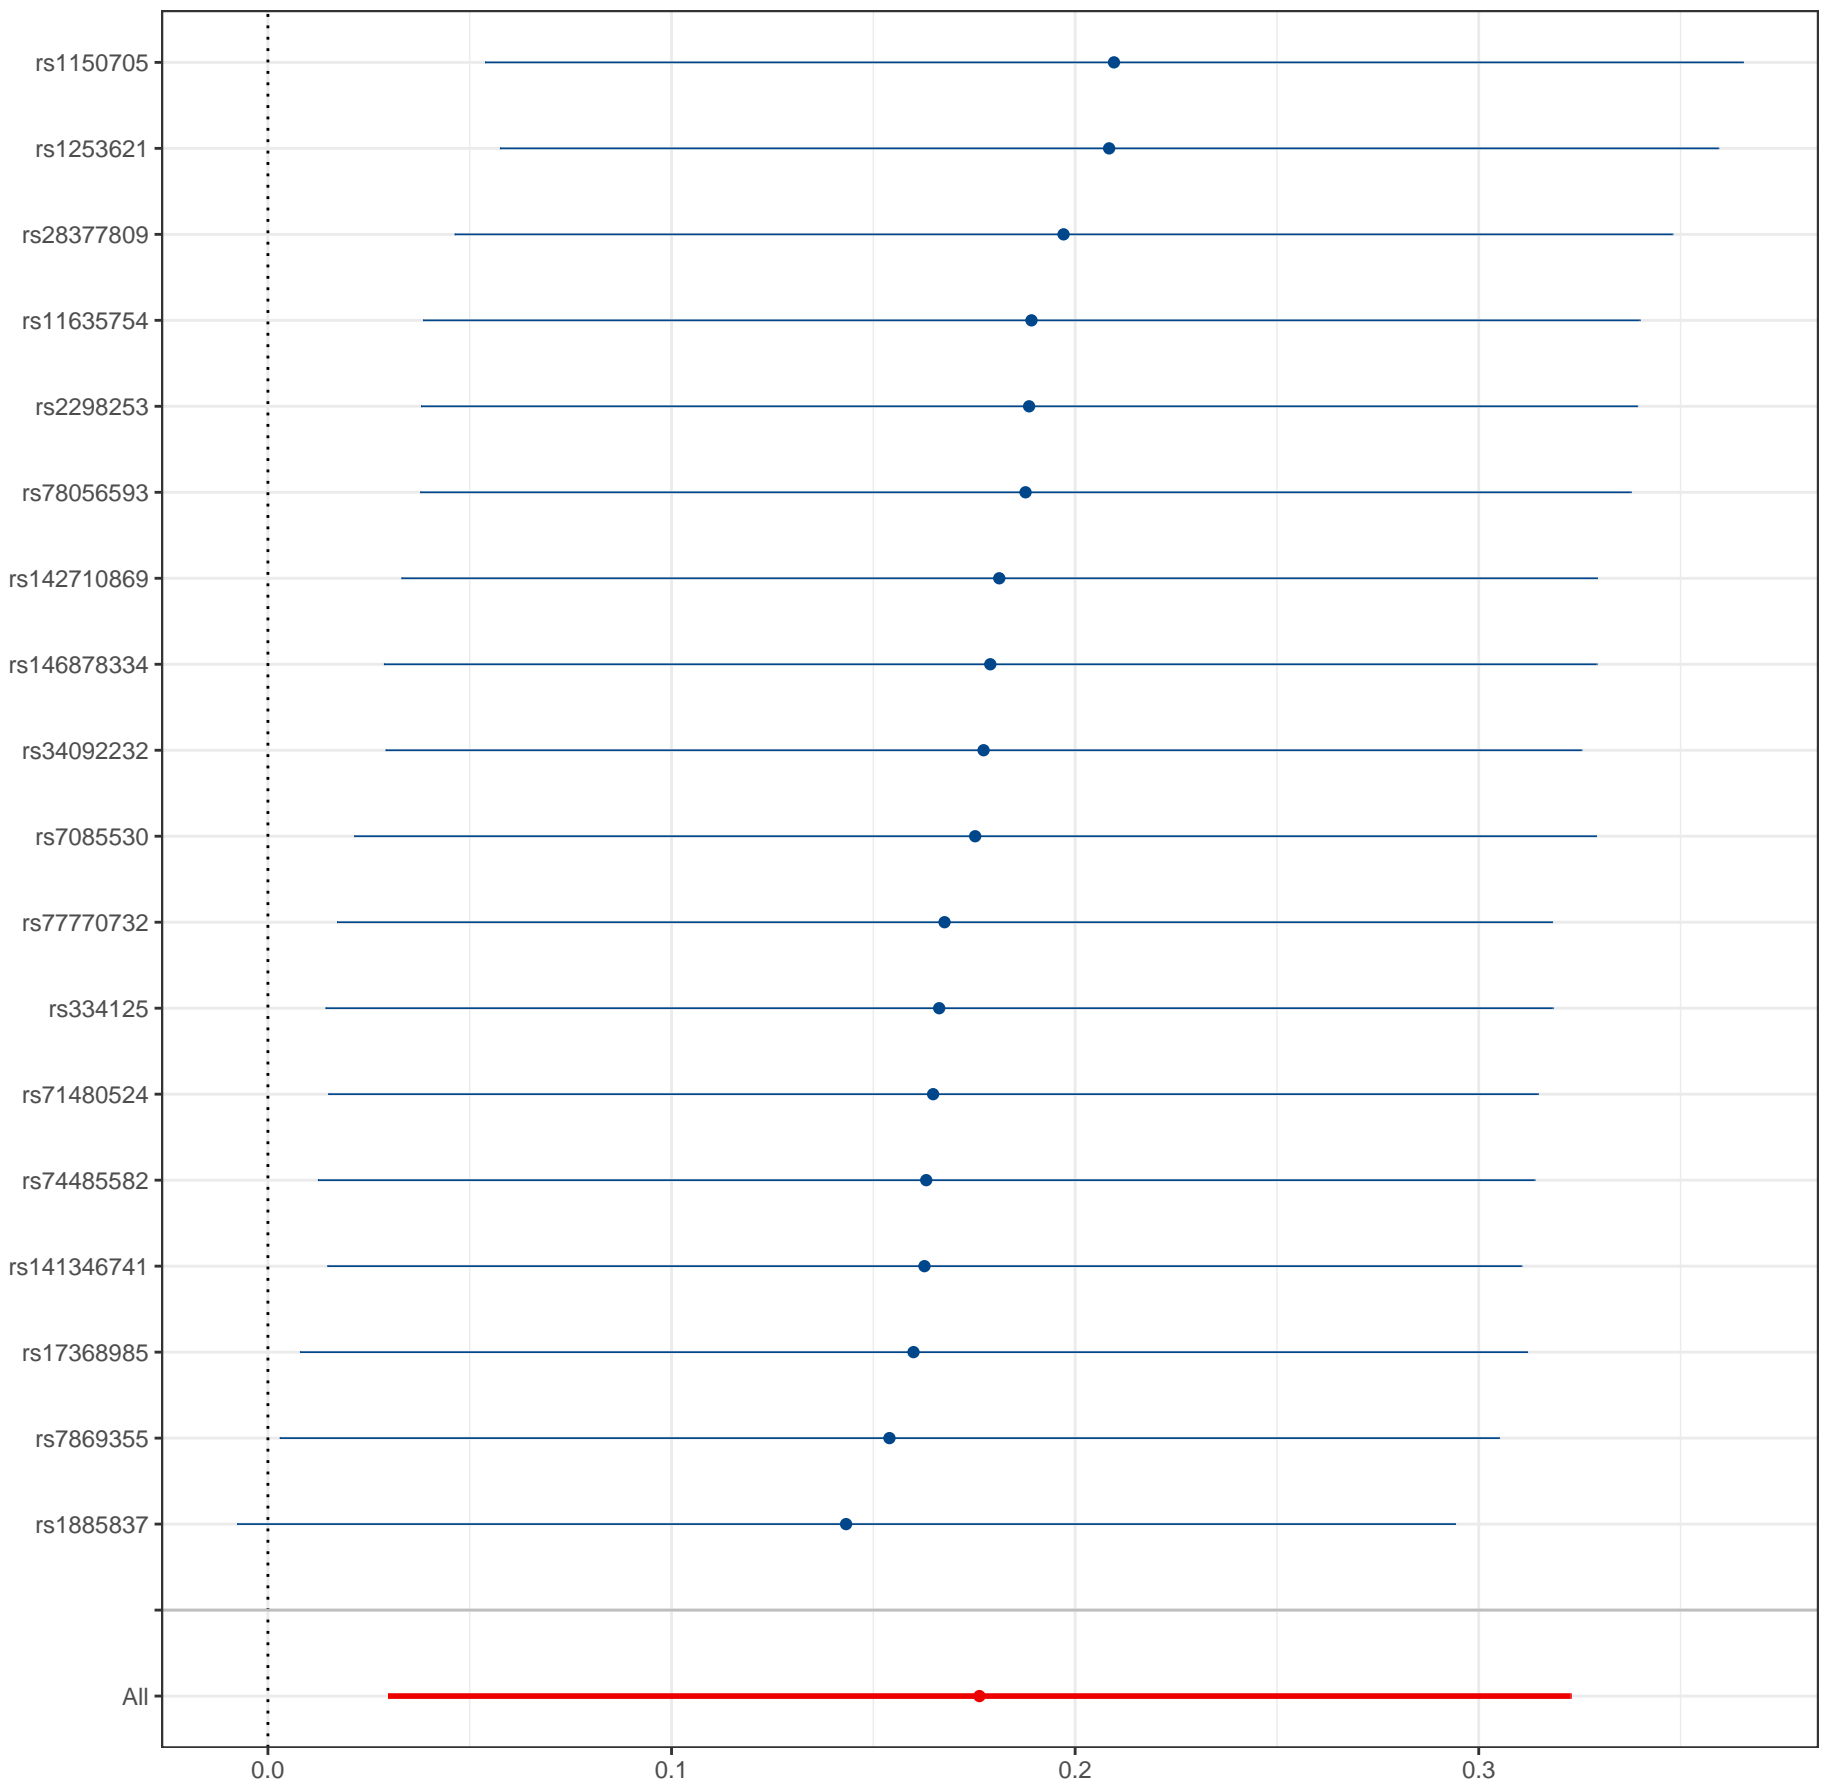

MR leave-one-out sensitivity analysis for 'Pyrraline levels' on 'Parkinson's disease || id:ieu-b-7'



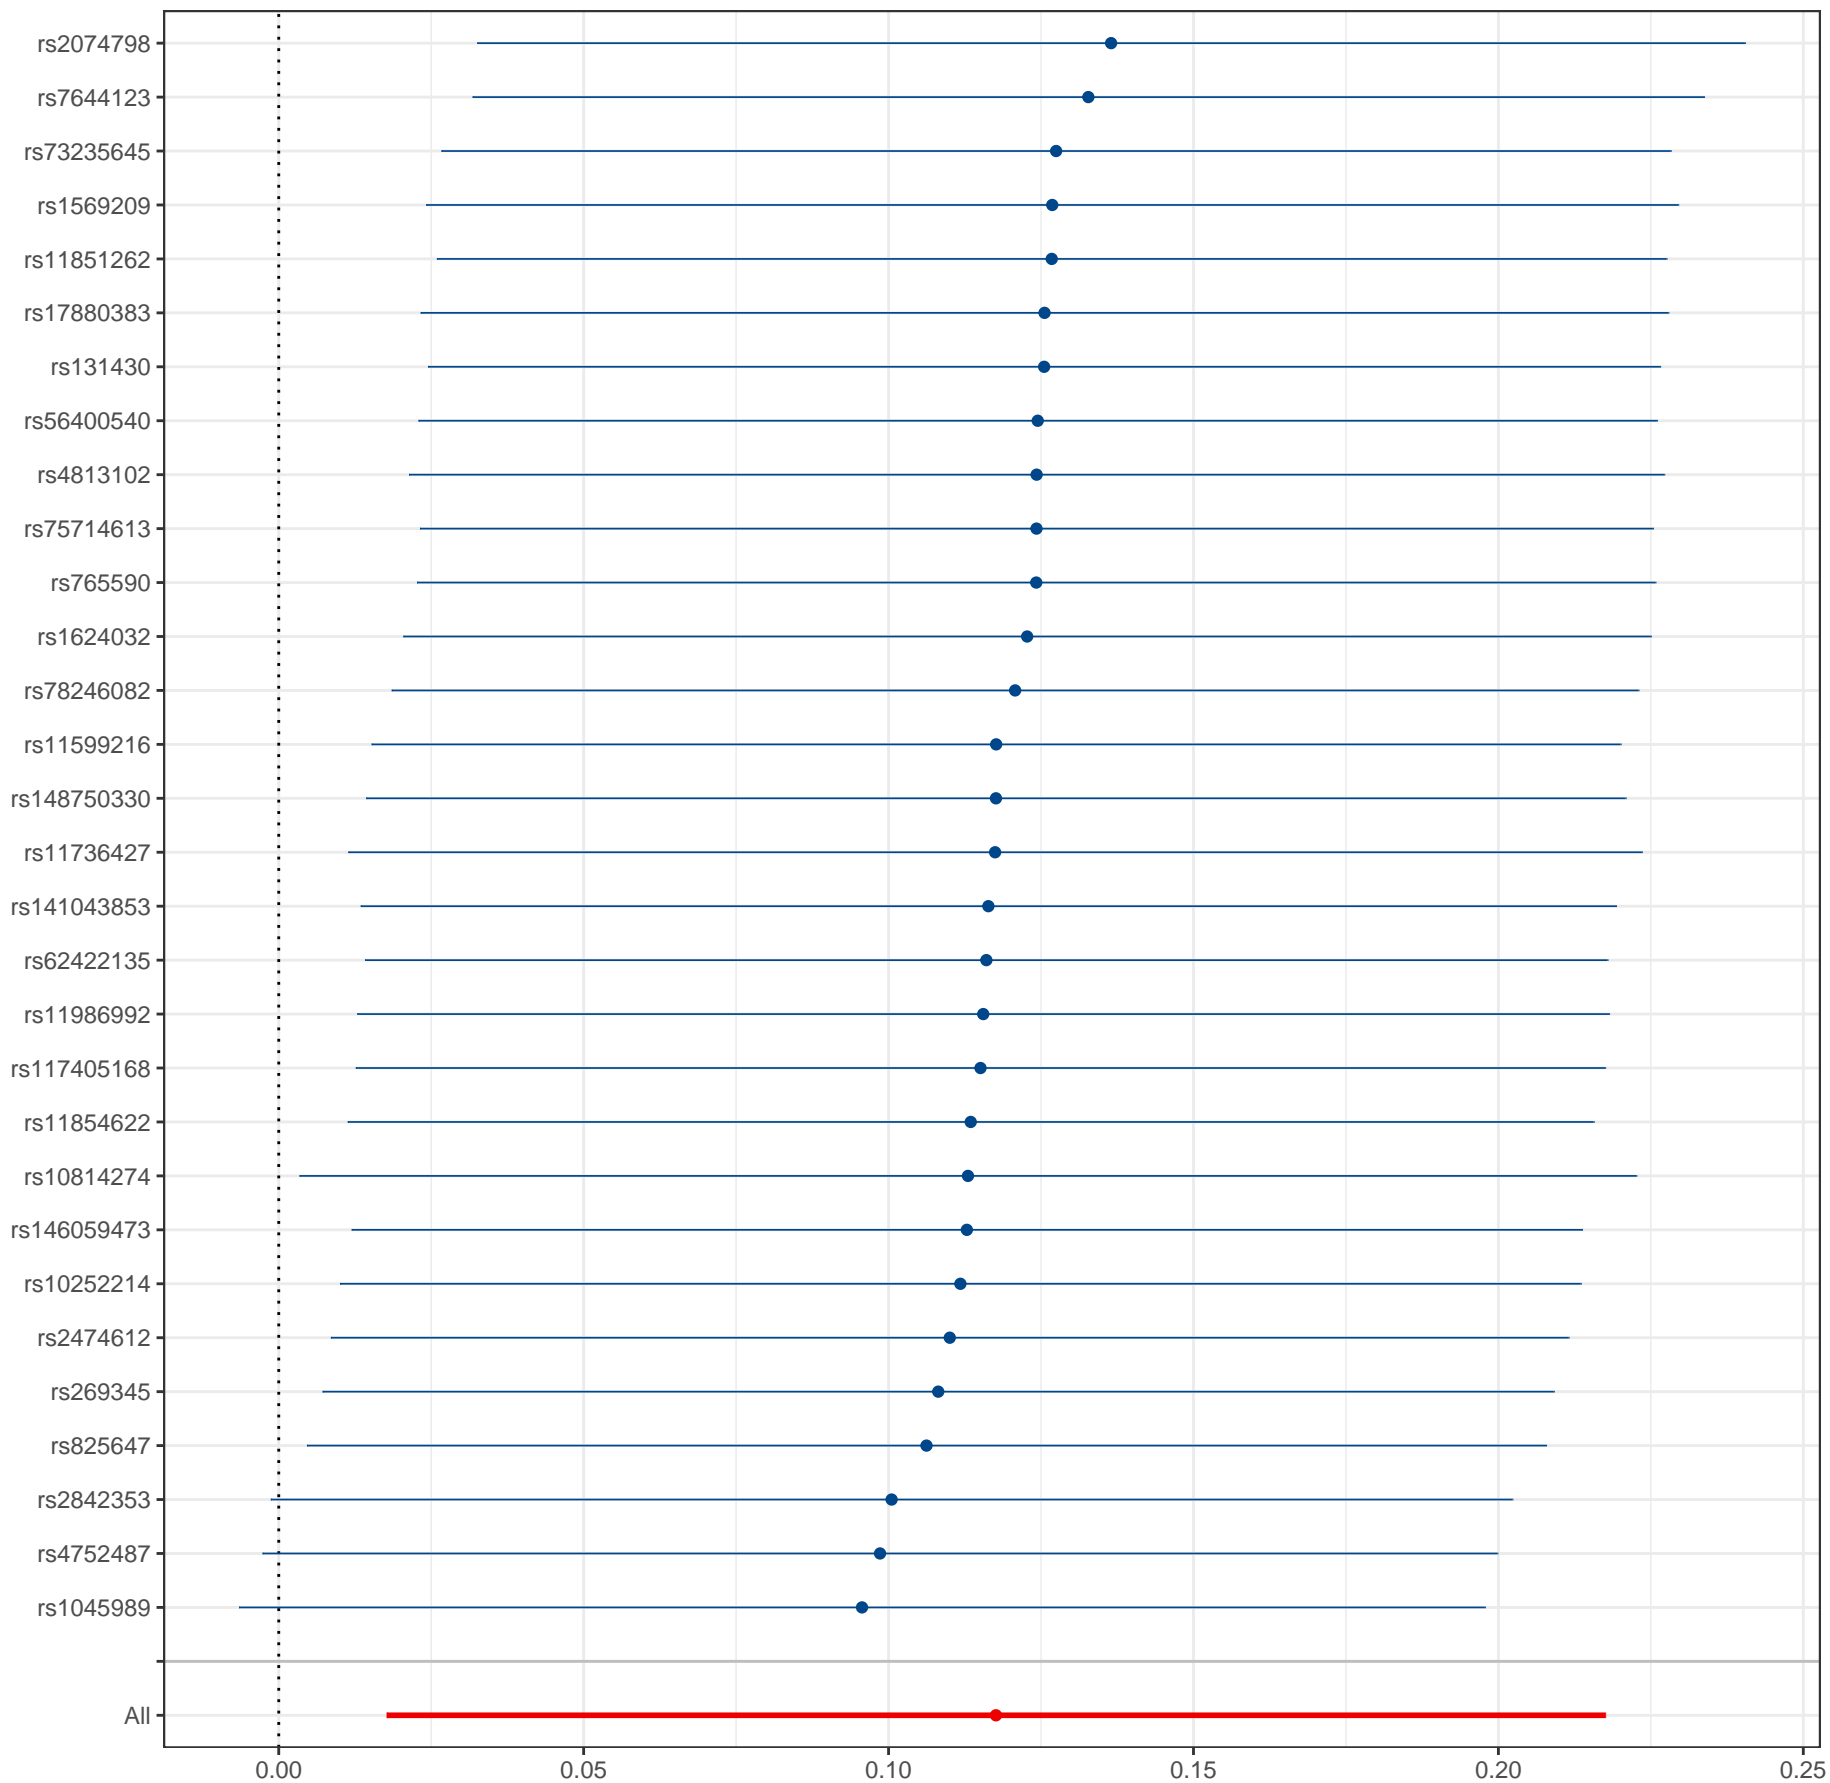

MR leave-one-out sensitivity analysis for 'Glycosyl-N-stearoyl-sphingosine (d18:1/18:0) levels' on 'Parkinson's disease || id:ieu-b-7'

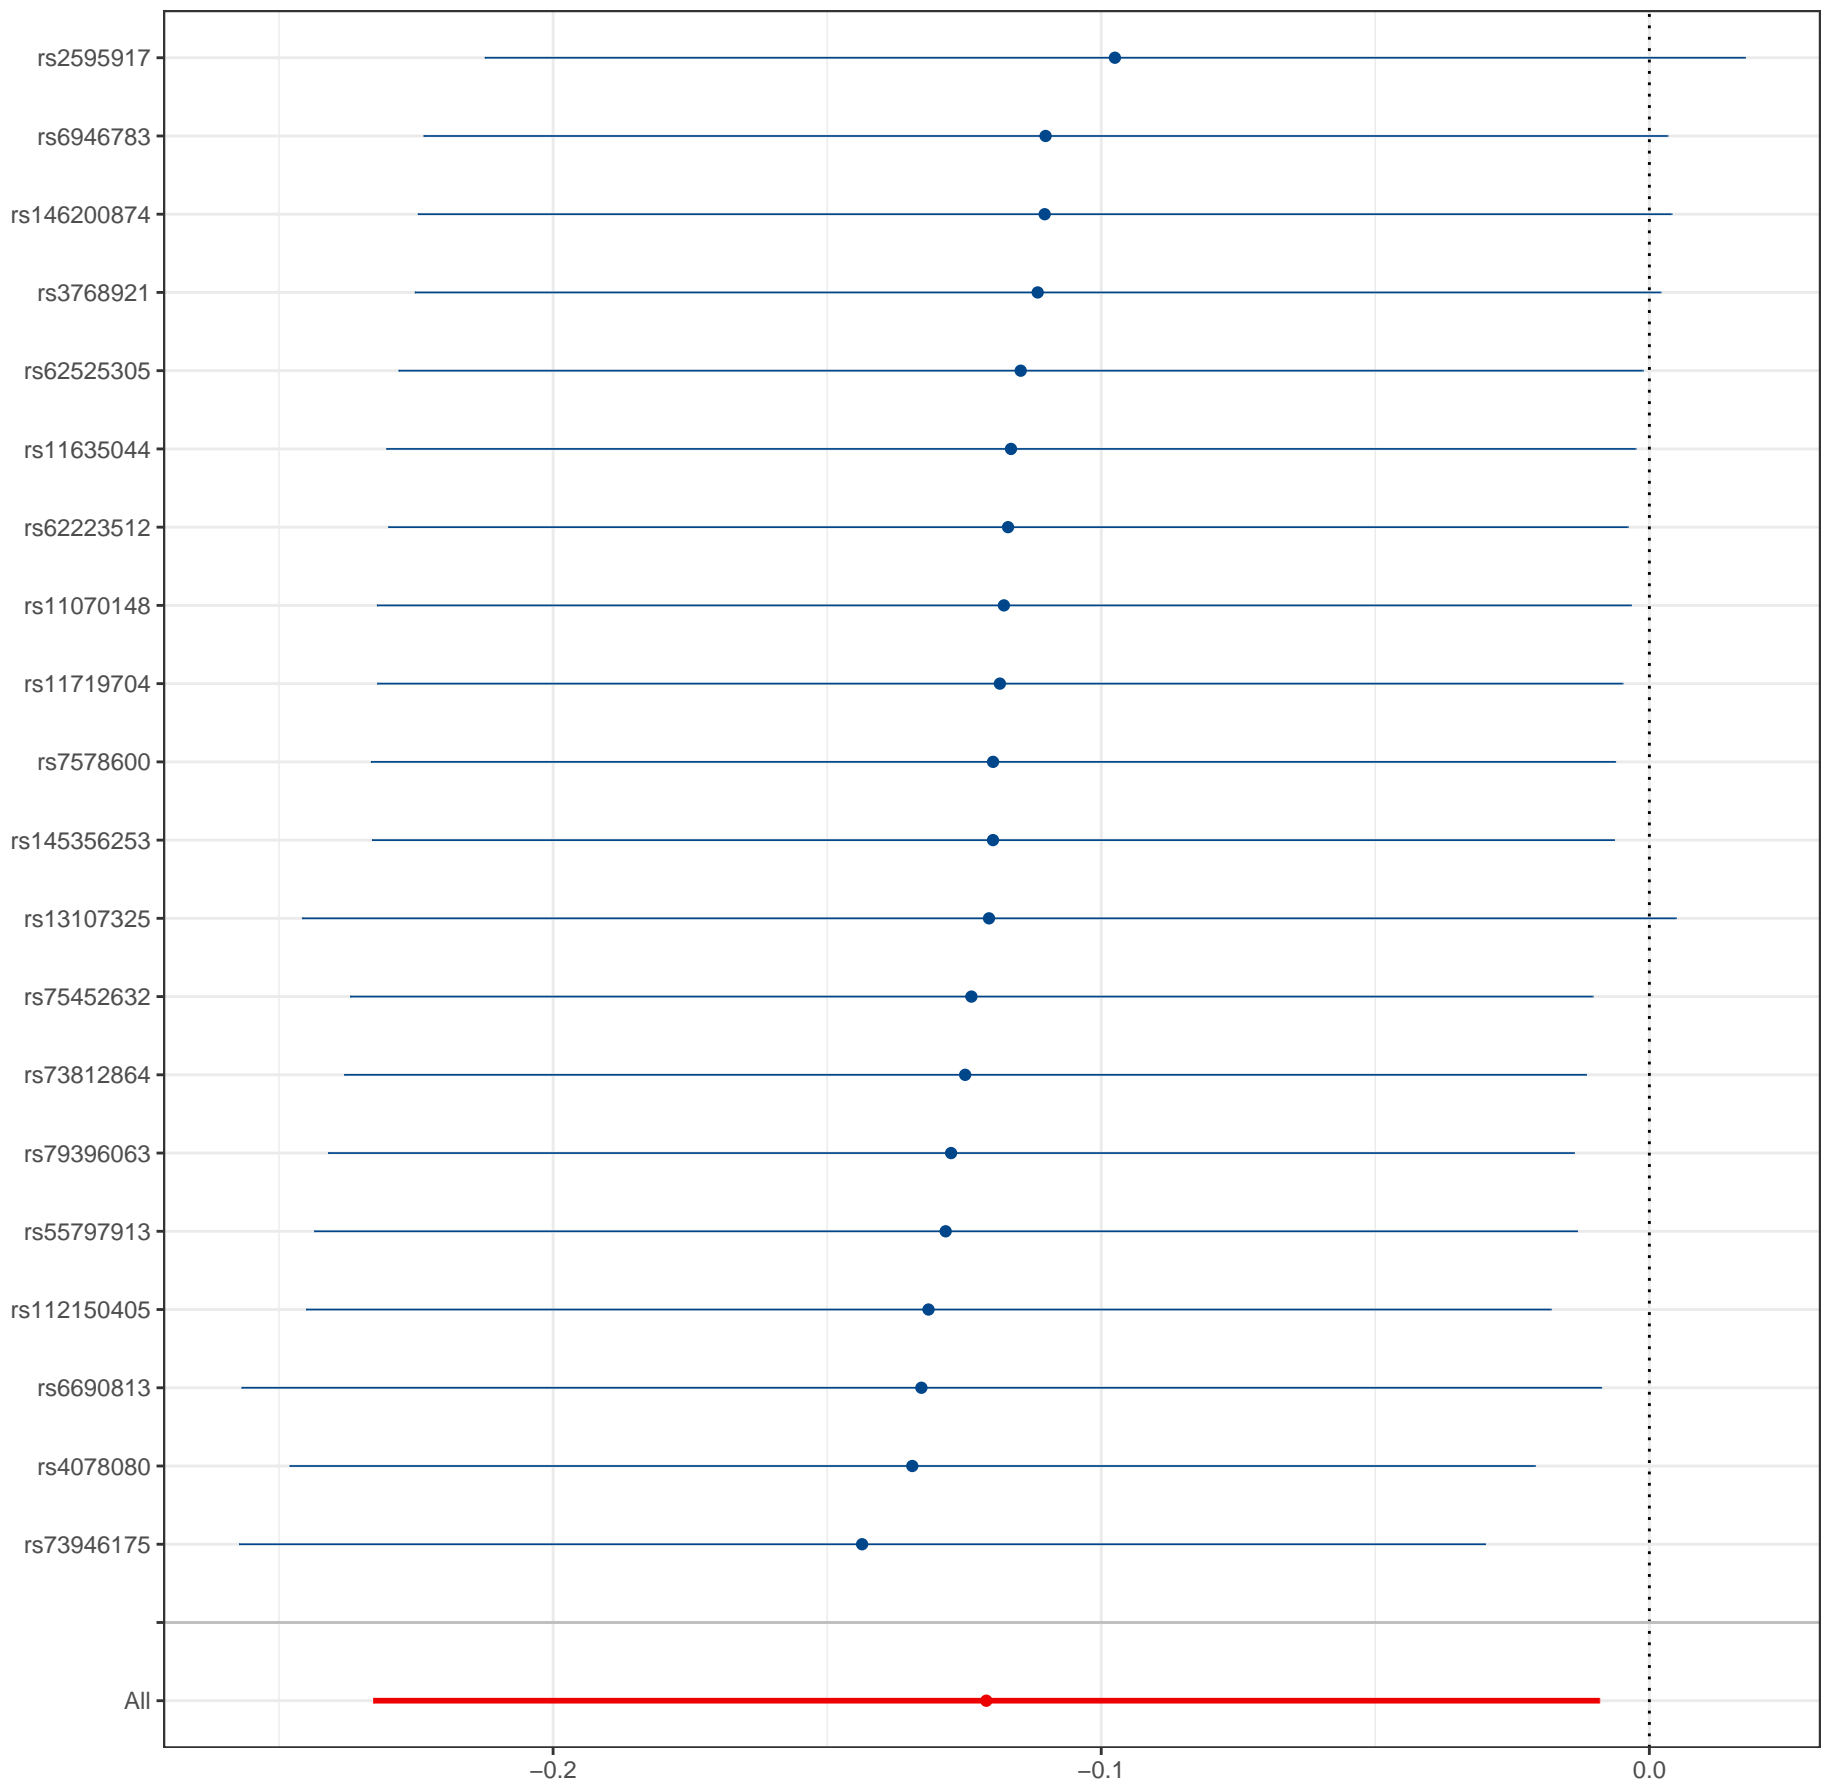

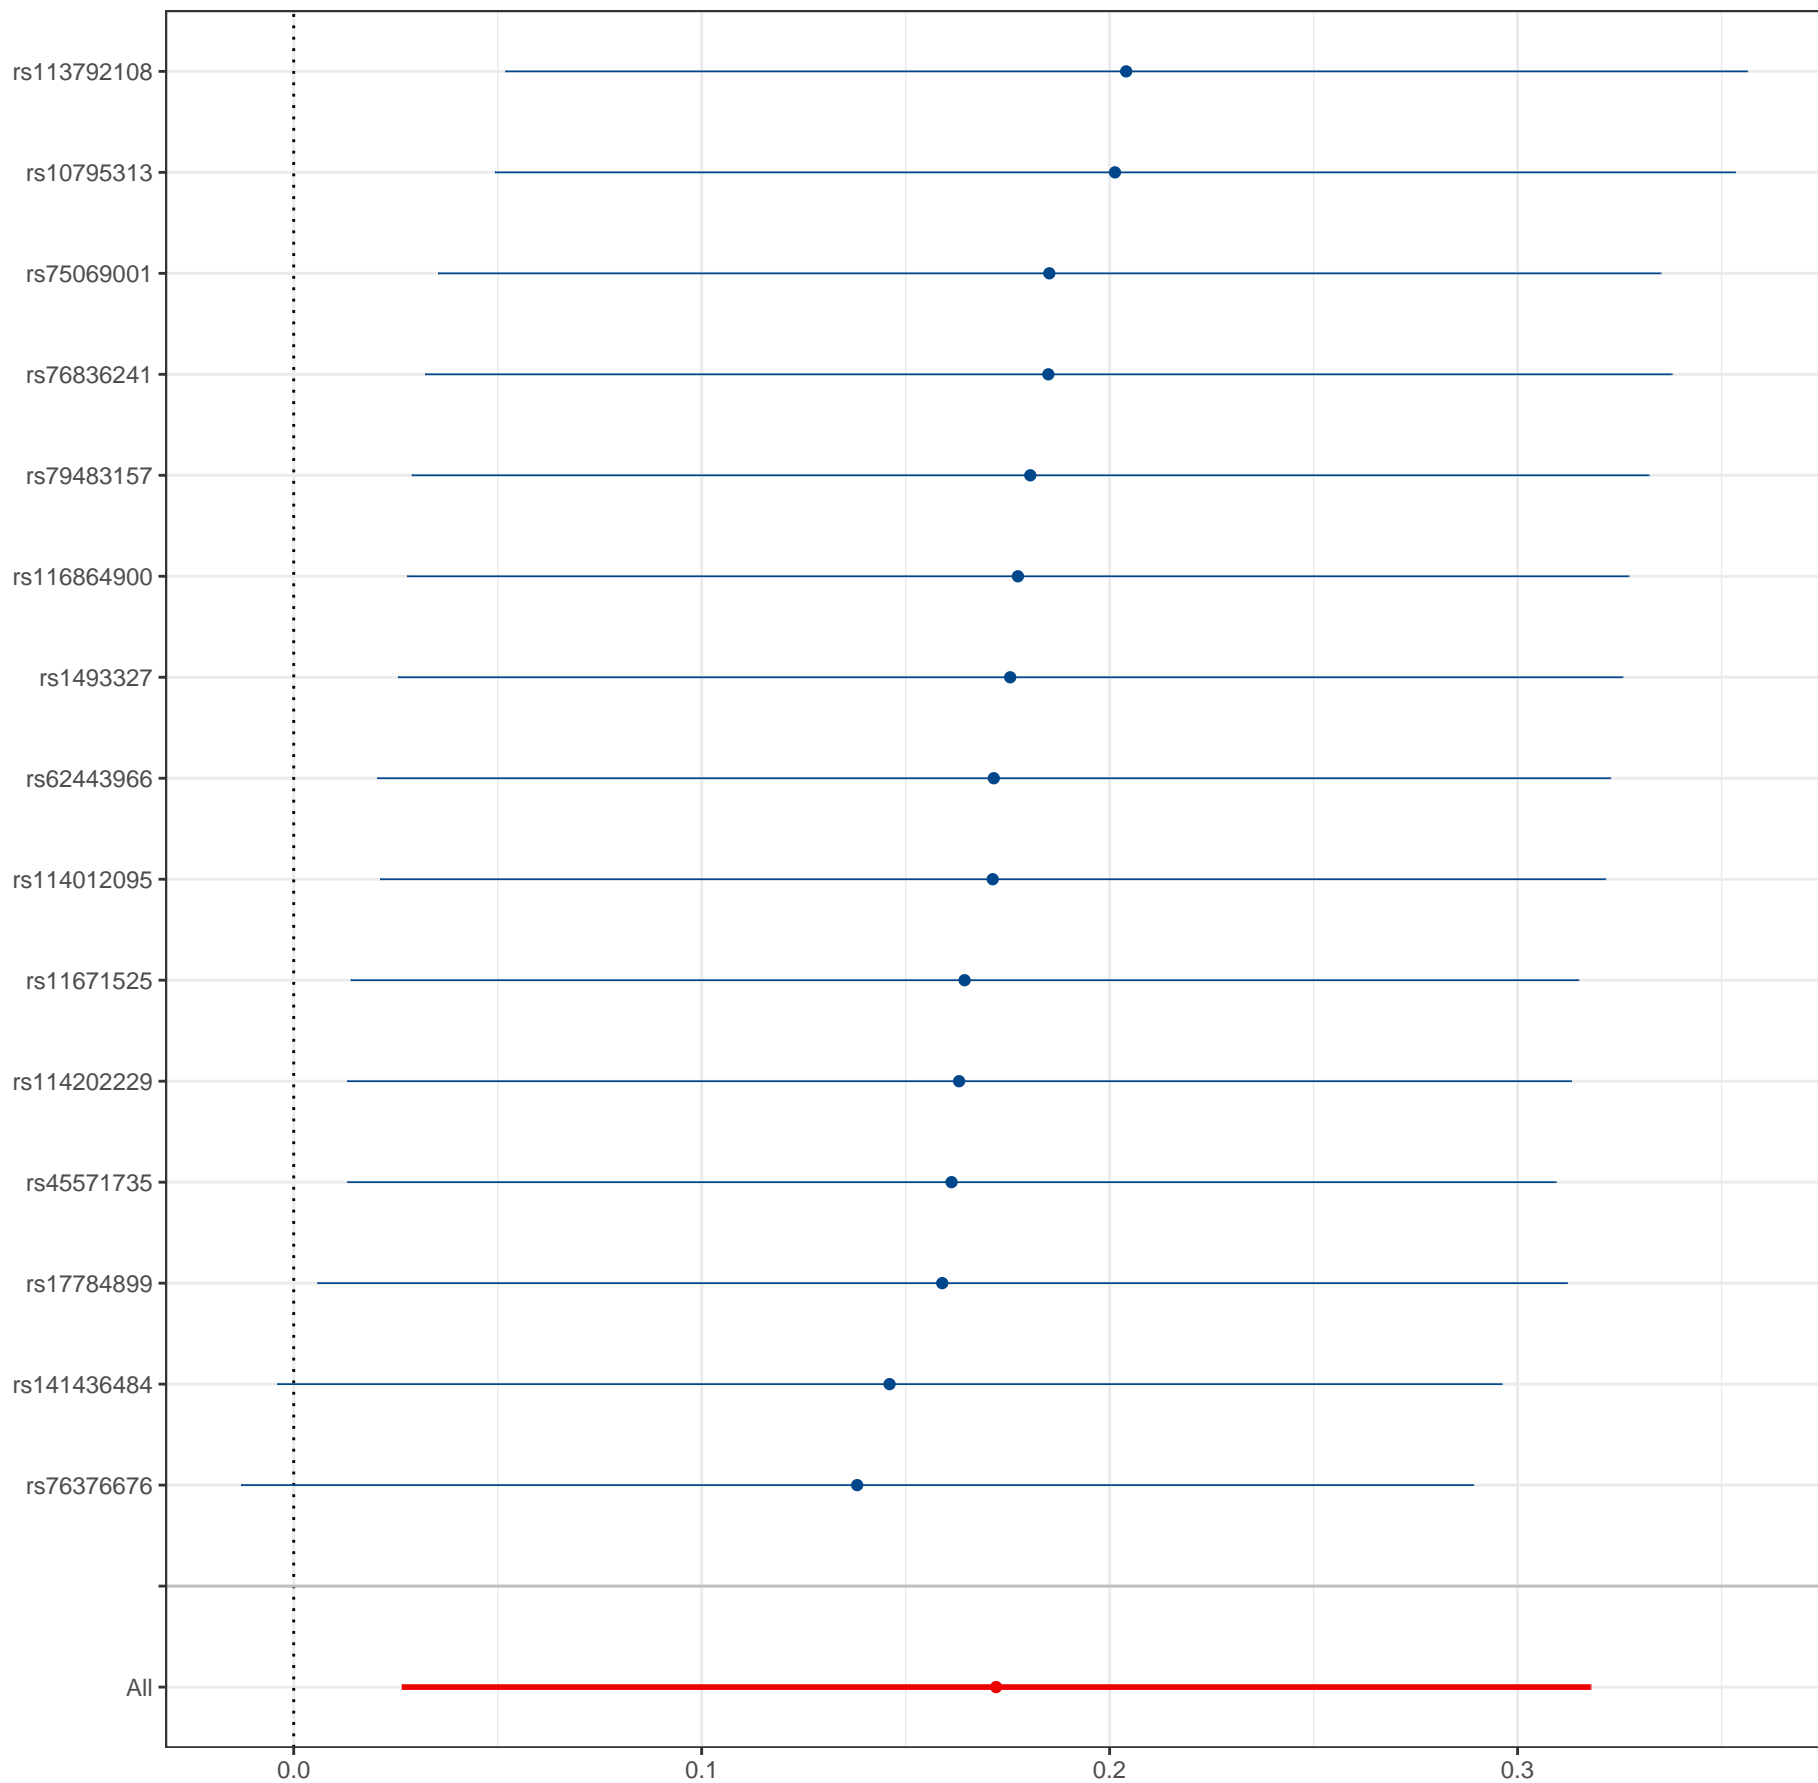

MR leave-one-out sensitivity analysis for 'N-oleoyltaurine levels' on 'Parkinson's disease || id:ieu-b-7'

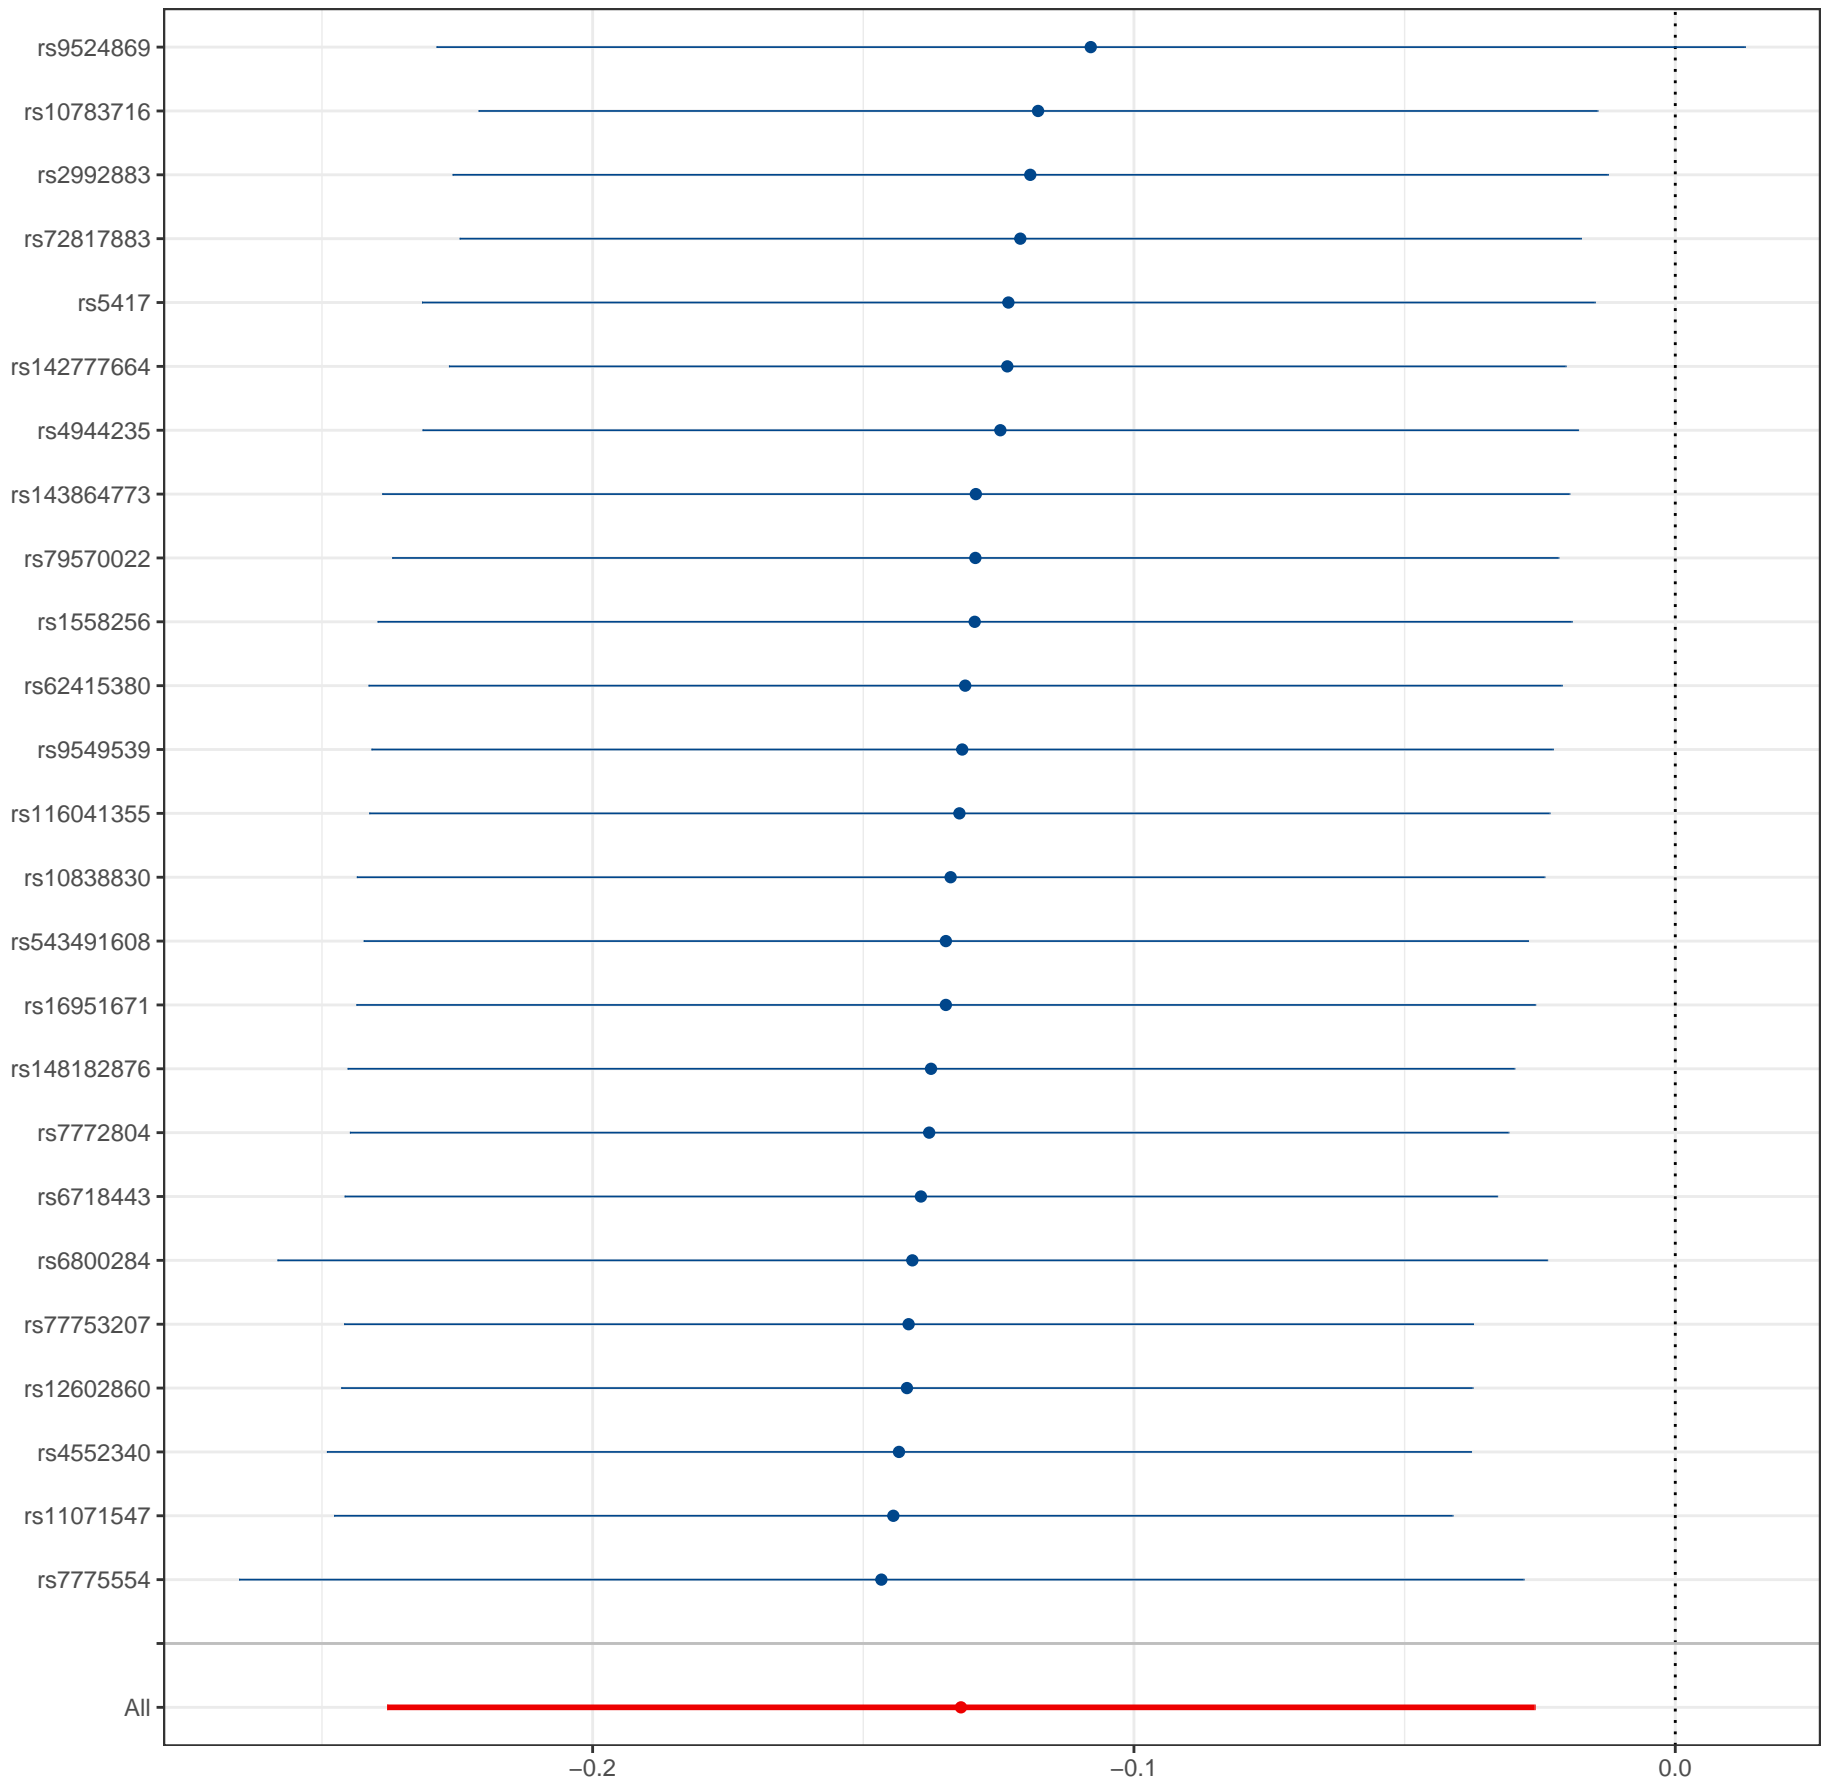

MR leave-one-out sensitivity analysis for 'N-acetylcarnosine levels' on 'Parkinson's disease || id:ieu-b-7'

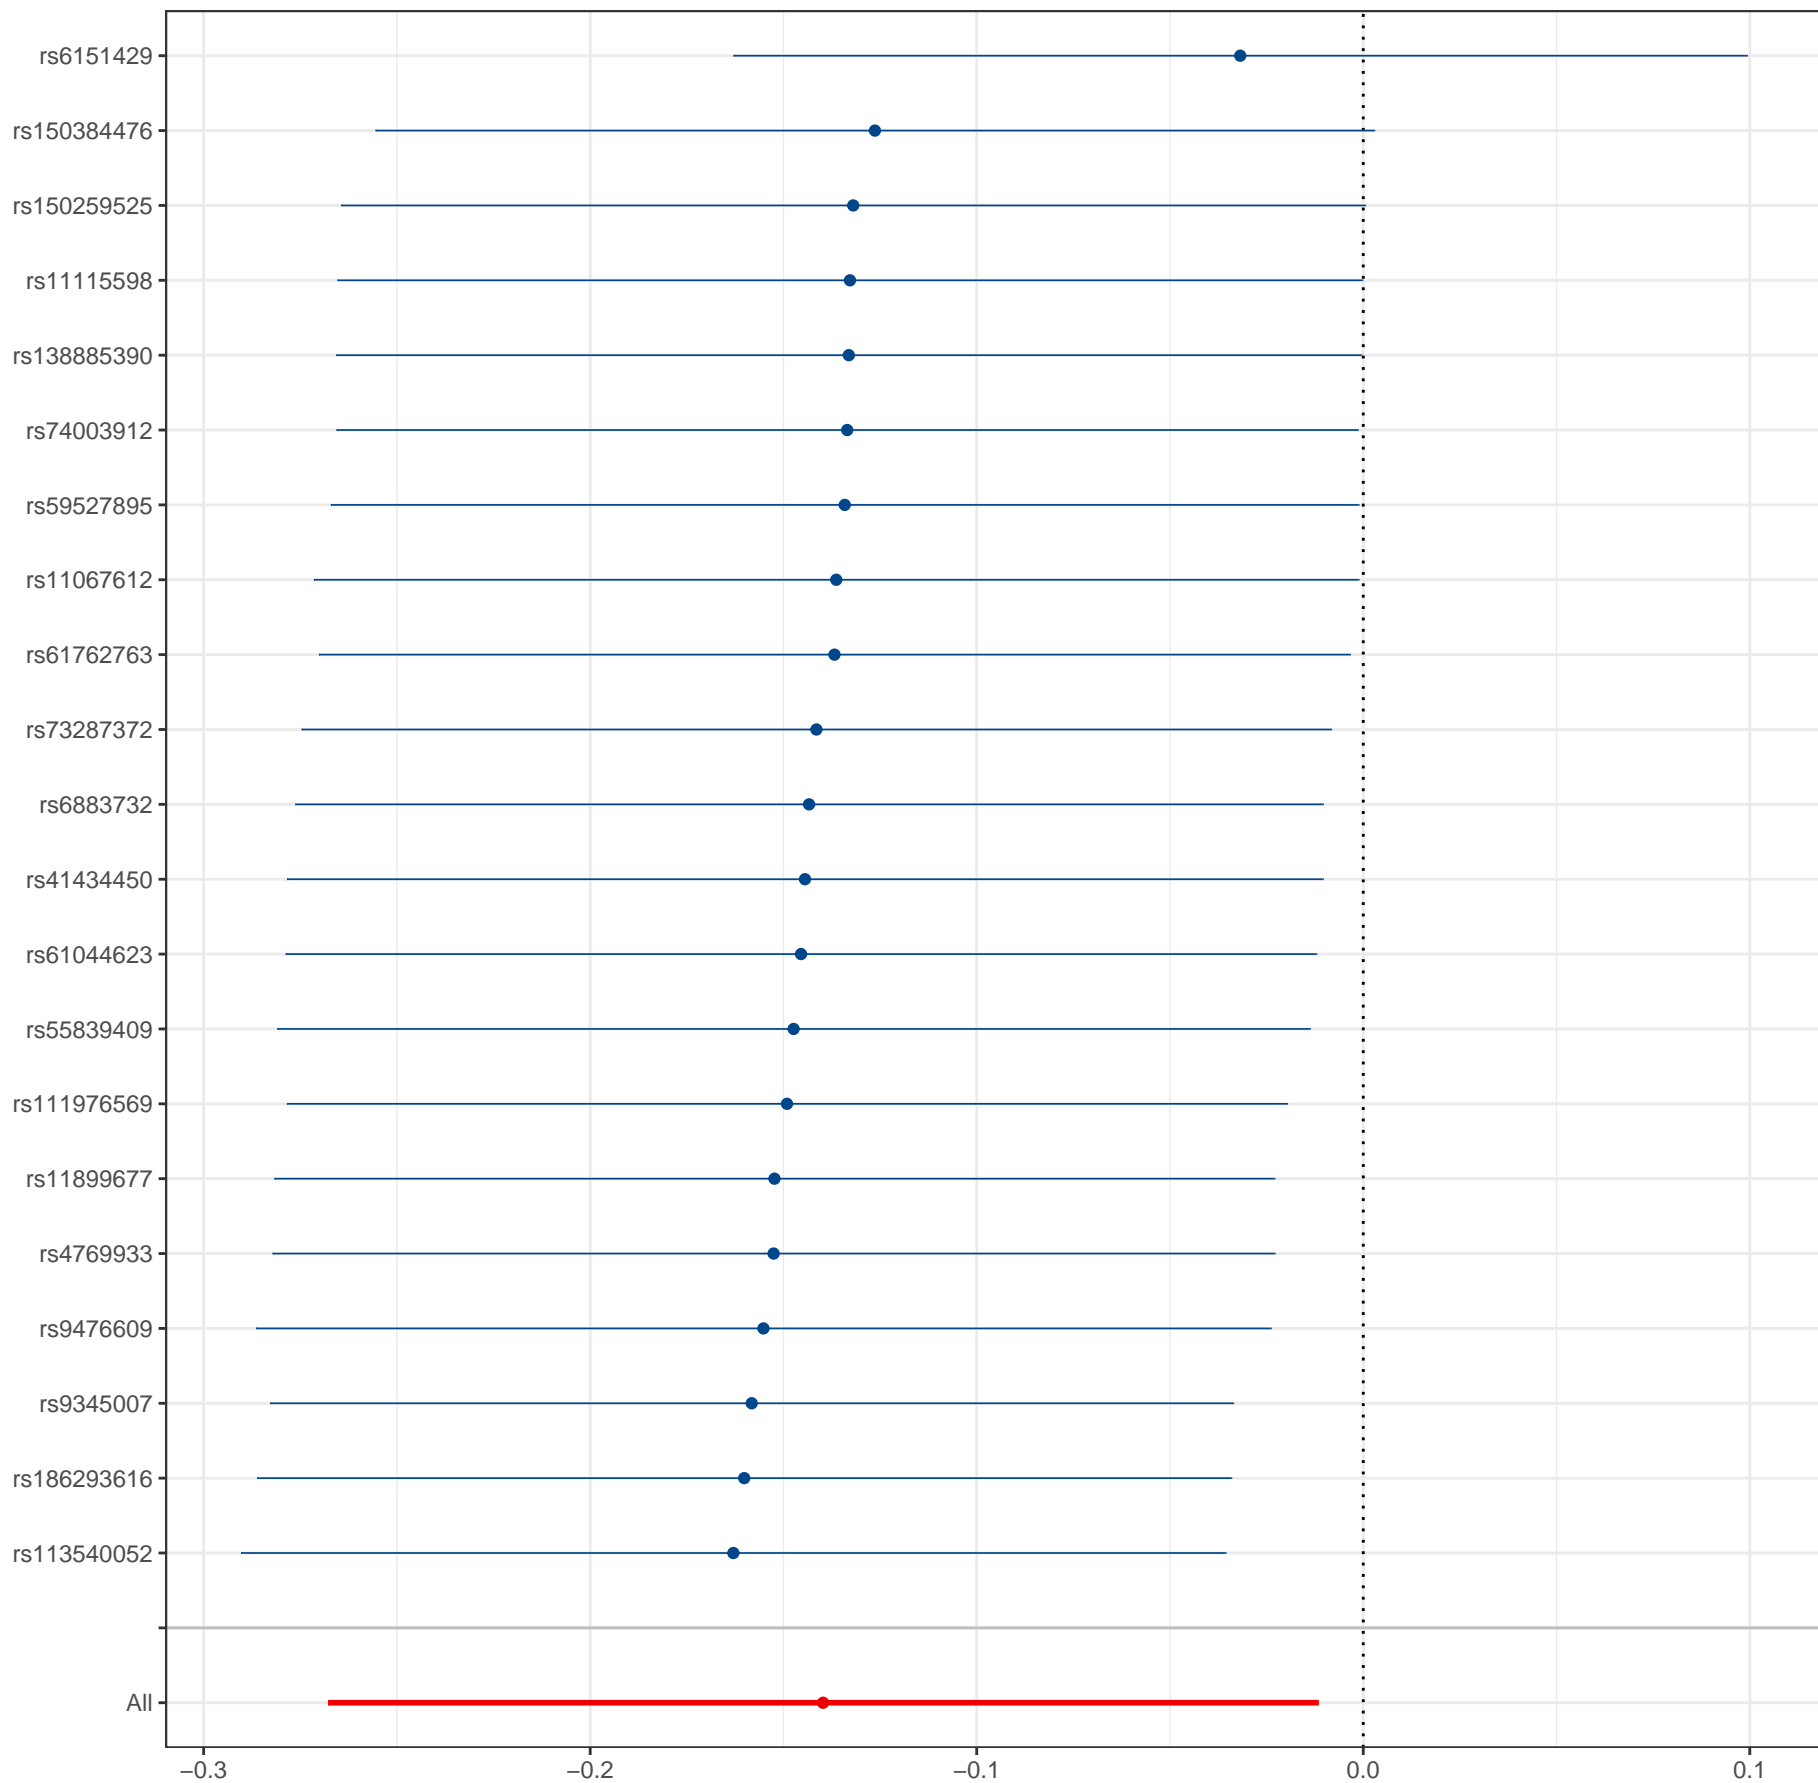

MR leave-one-out sensitivity analysis for 'O-sulfo-l-tyrosine levels' on 'Parkinson's disease || id:ieu-b-7'

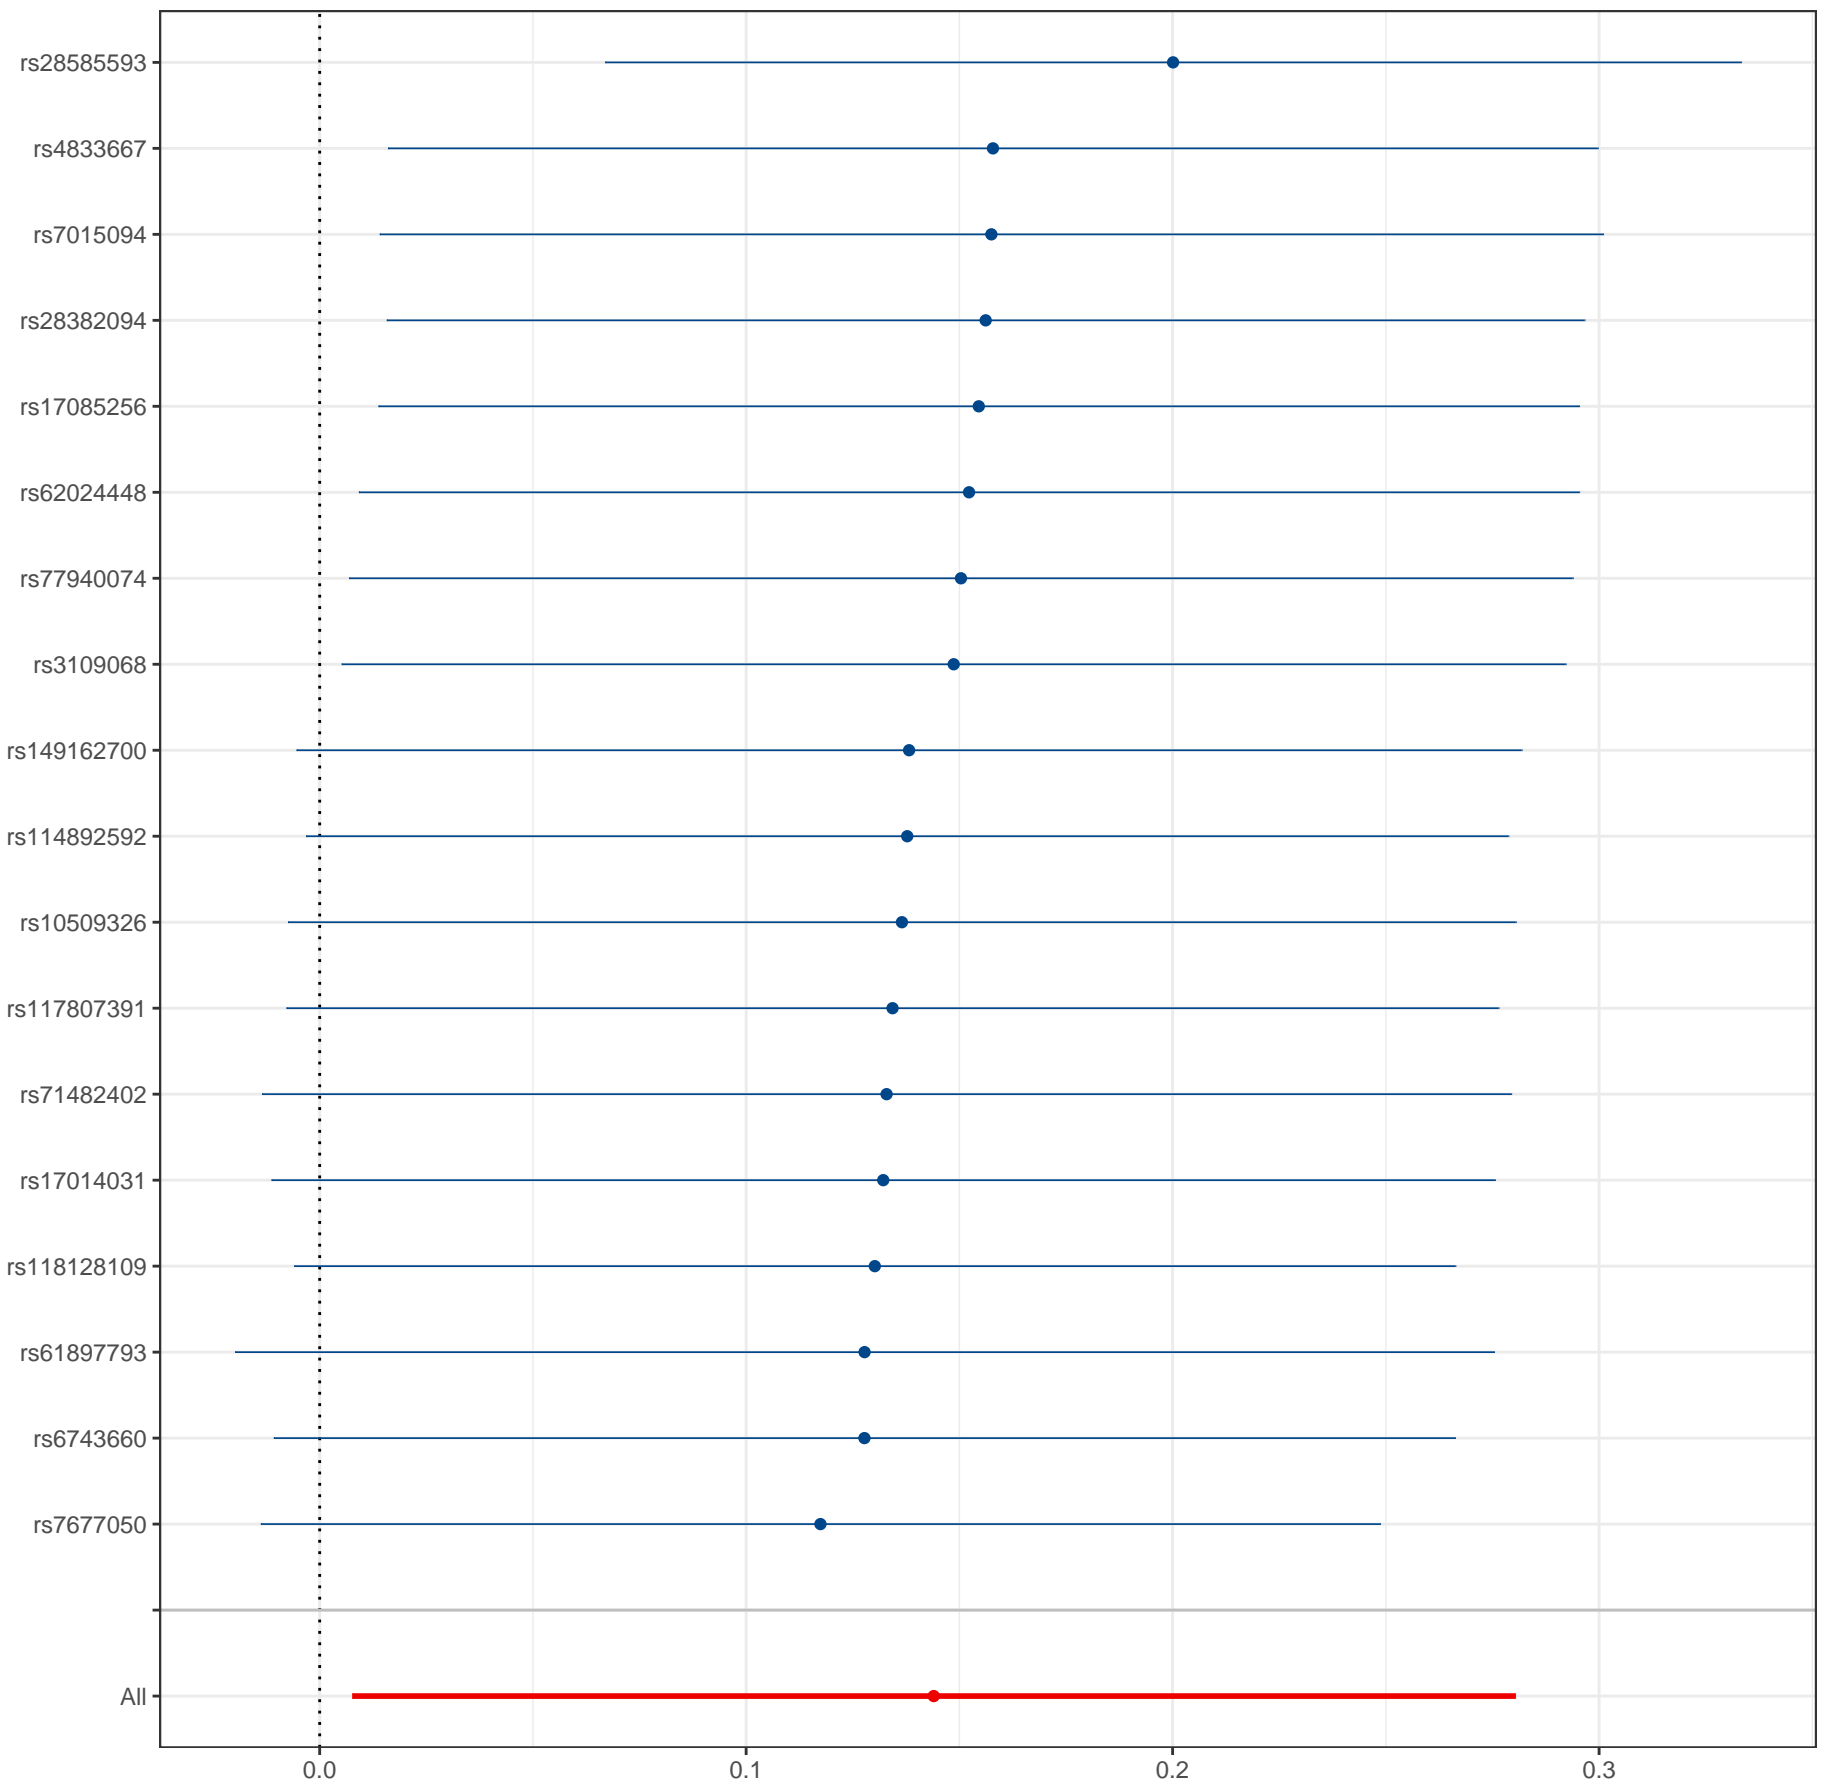

MR leave-one-out sensitivity analysis for '1-dihomo-linolenylglycerol (20:3) levels' on 'Parkinson's disease || id:ieu-b-7'

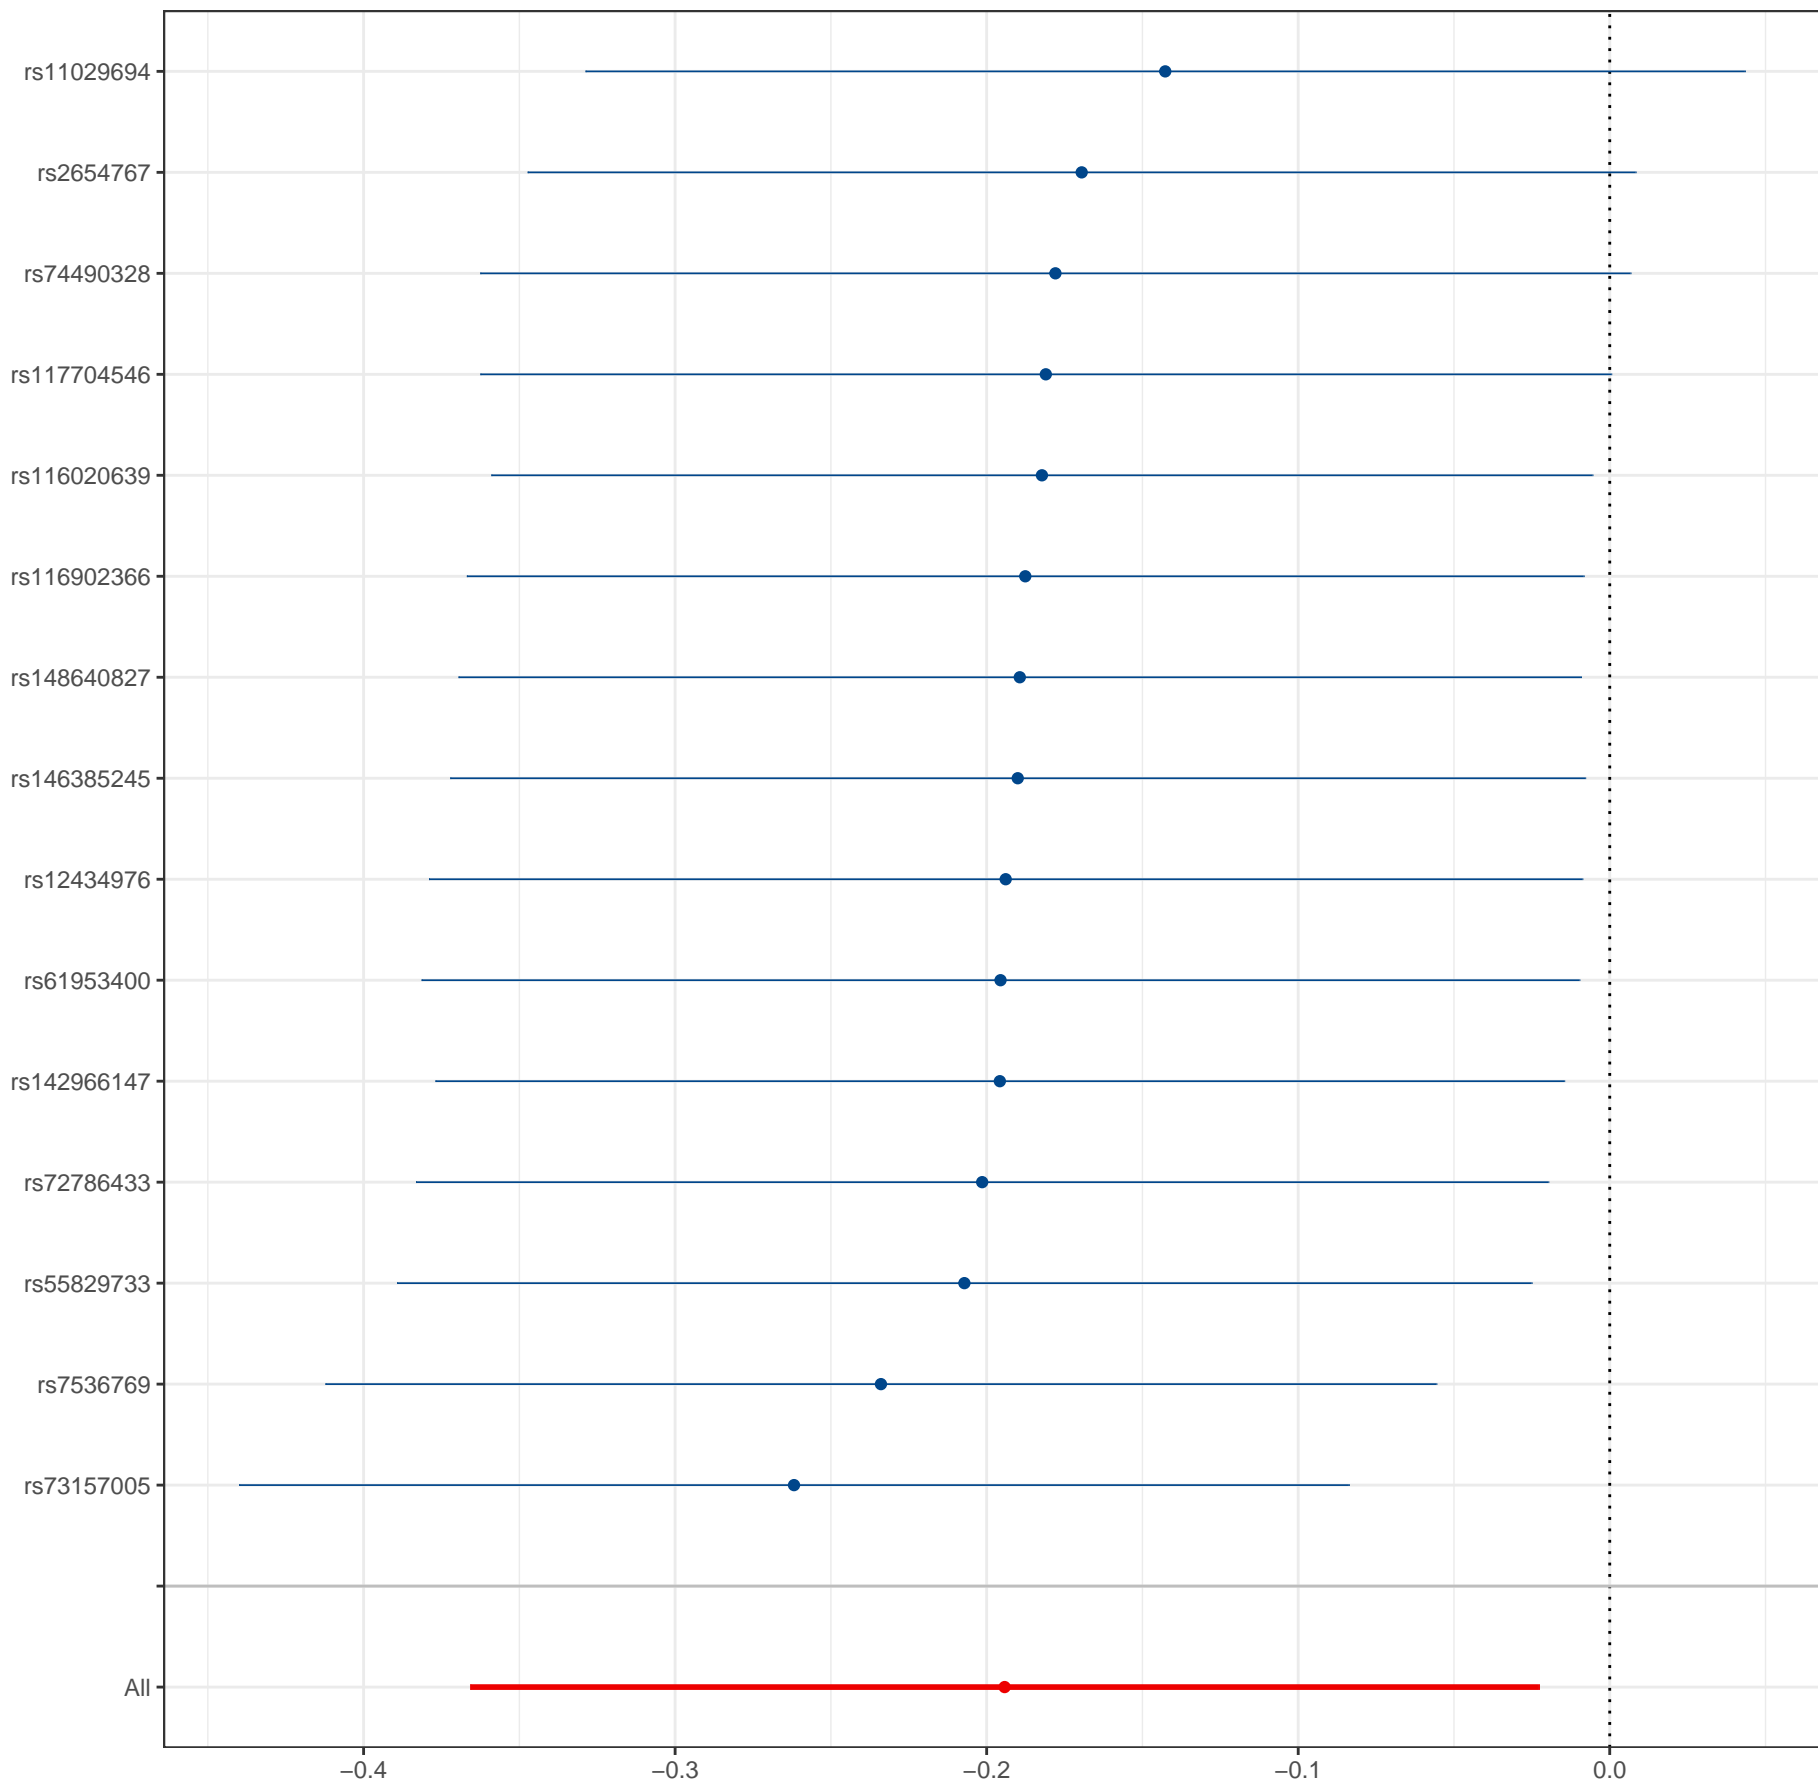

MR leave-one-out sensitivity analysis for 'Citraconate/glutaconate levels' on 'Parkinson's disease || id:ieu-b-7'

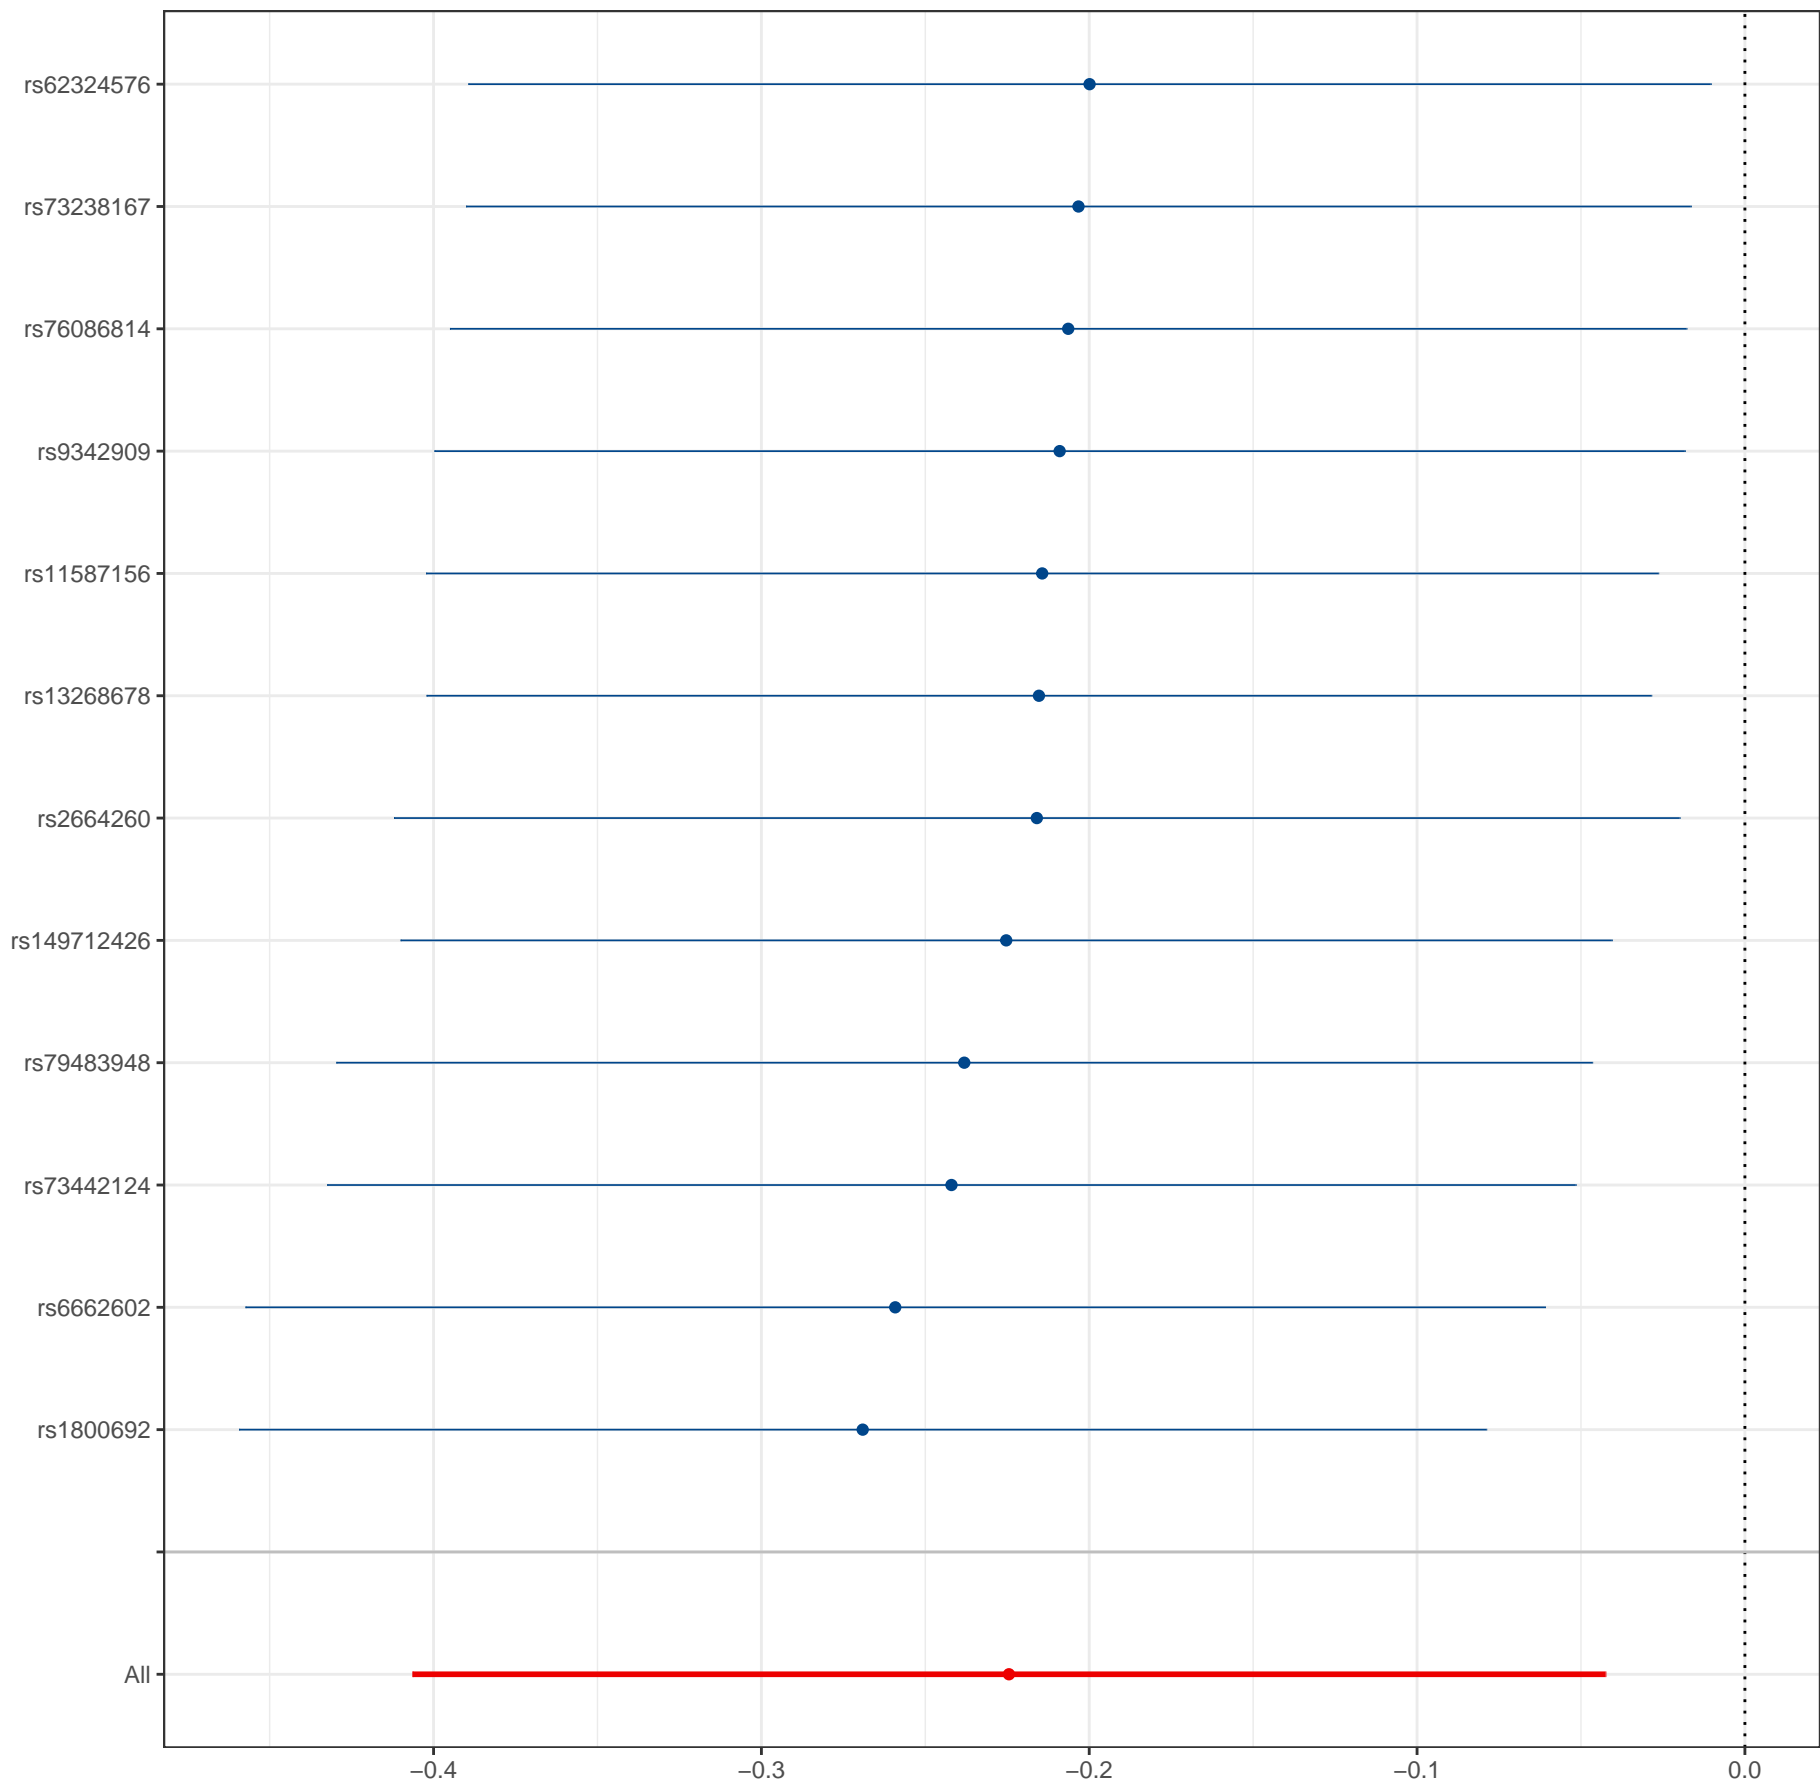

MR leave-one-out sensitivity analysis for  
'3-hydroxyhexanoate levels' on 'Parkinson's disease || id:ieu-b-7'



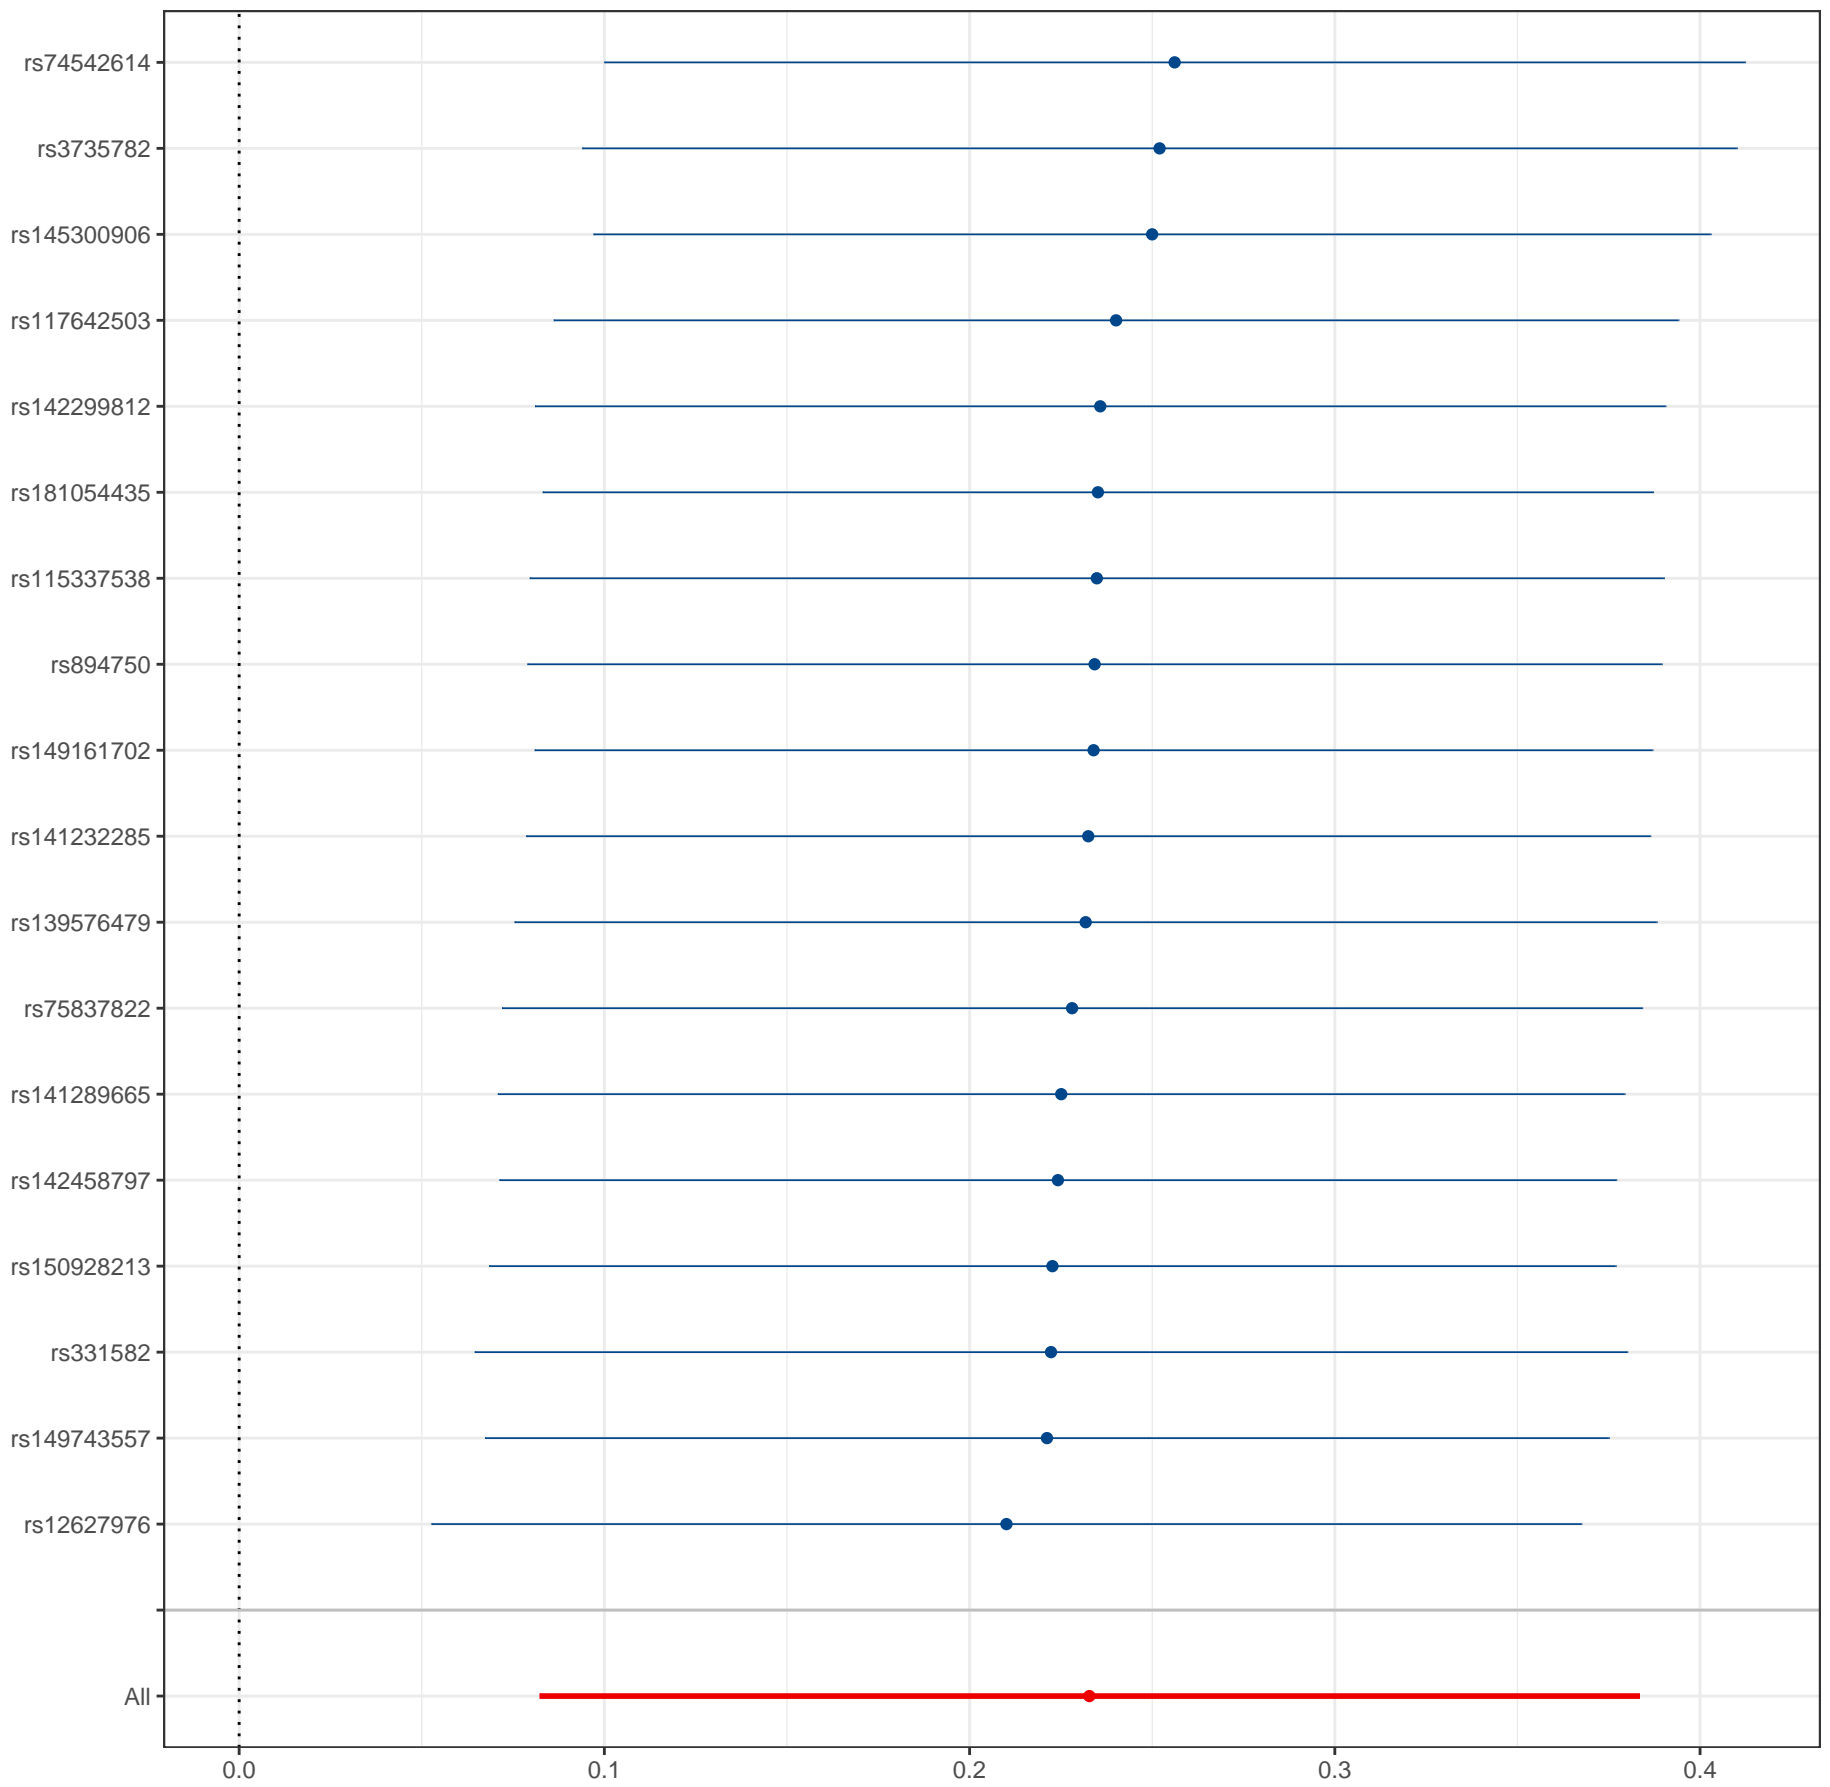

MR leave-one-out sensitivity analysis for  
'1-linoleoyl-GPG (18:2) levels' on 'Parkinson's disease || id:ieu-b-7'

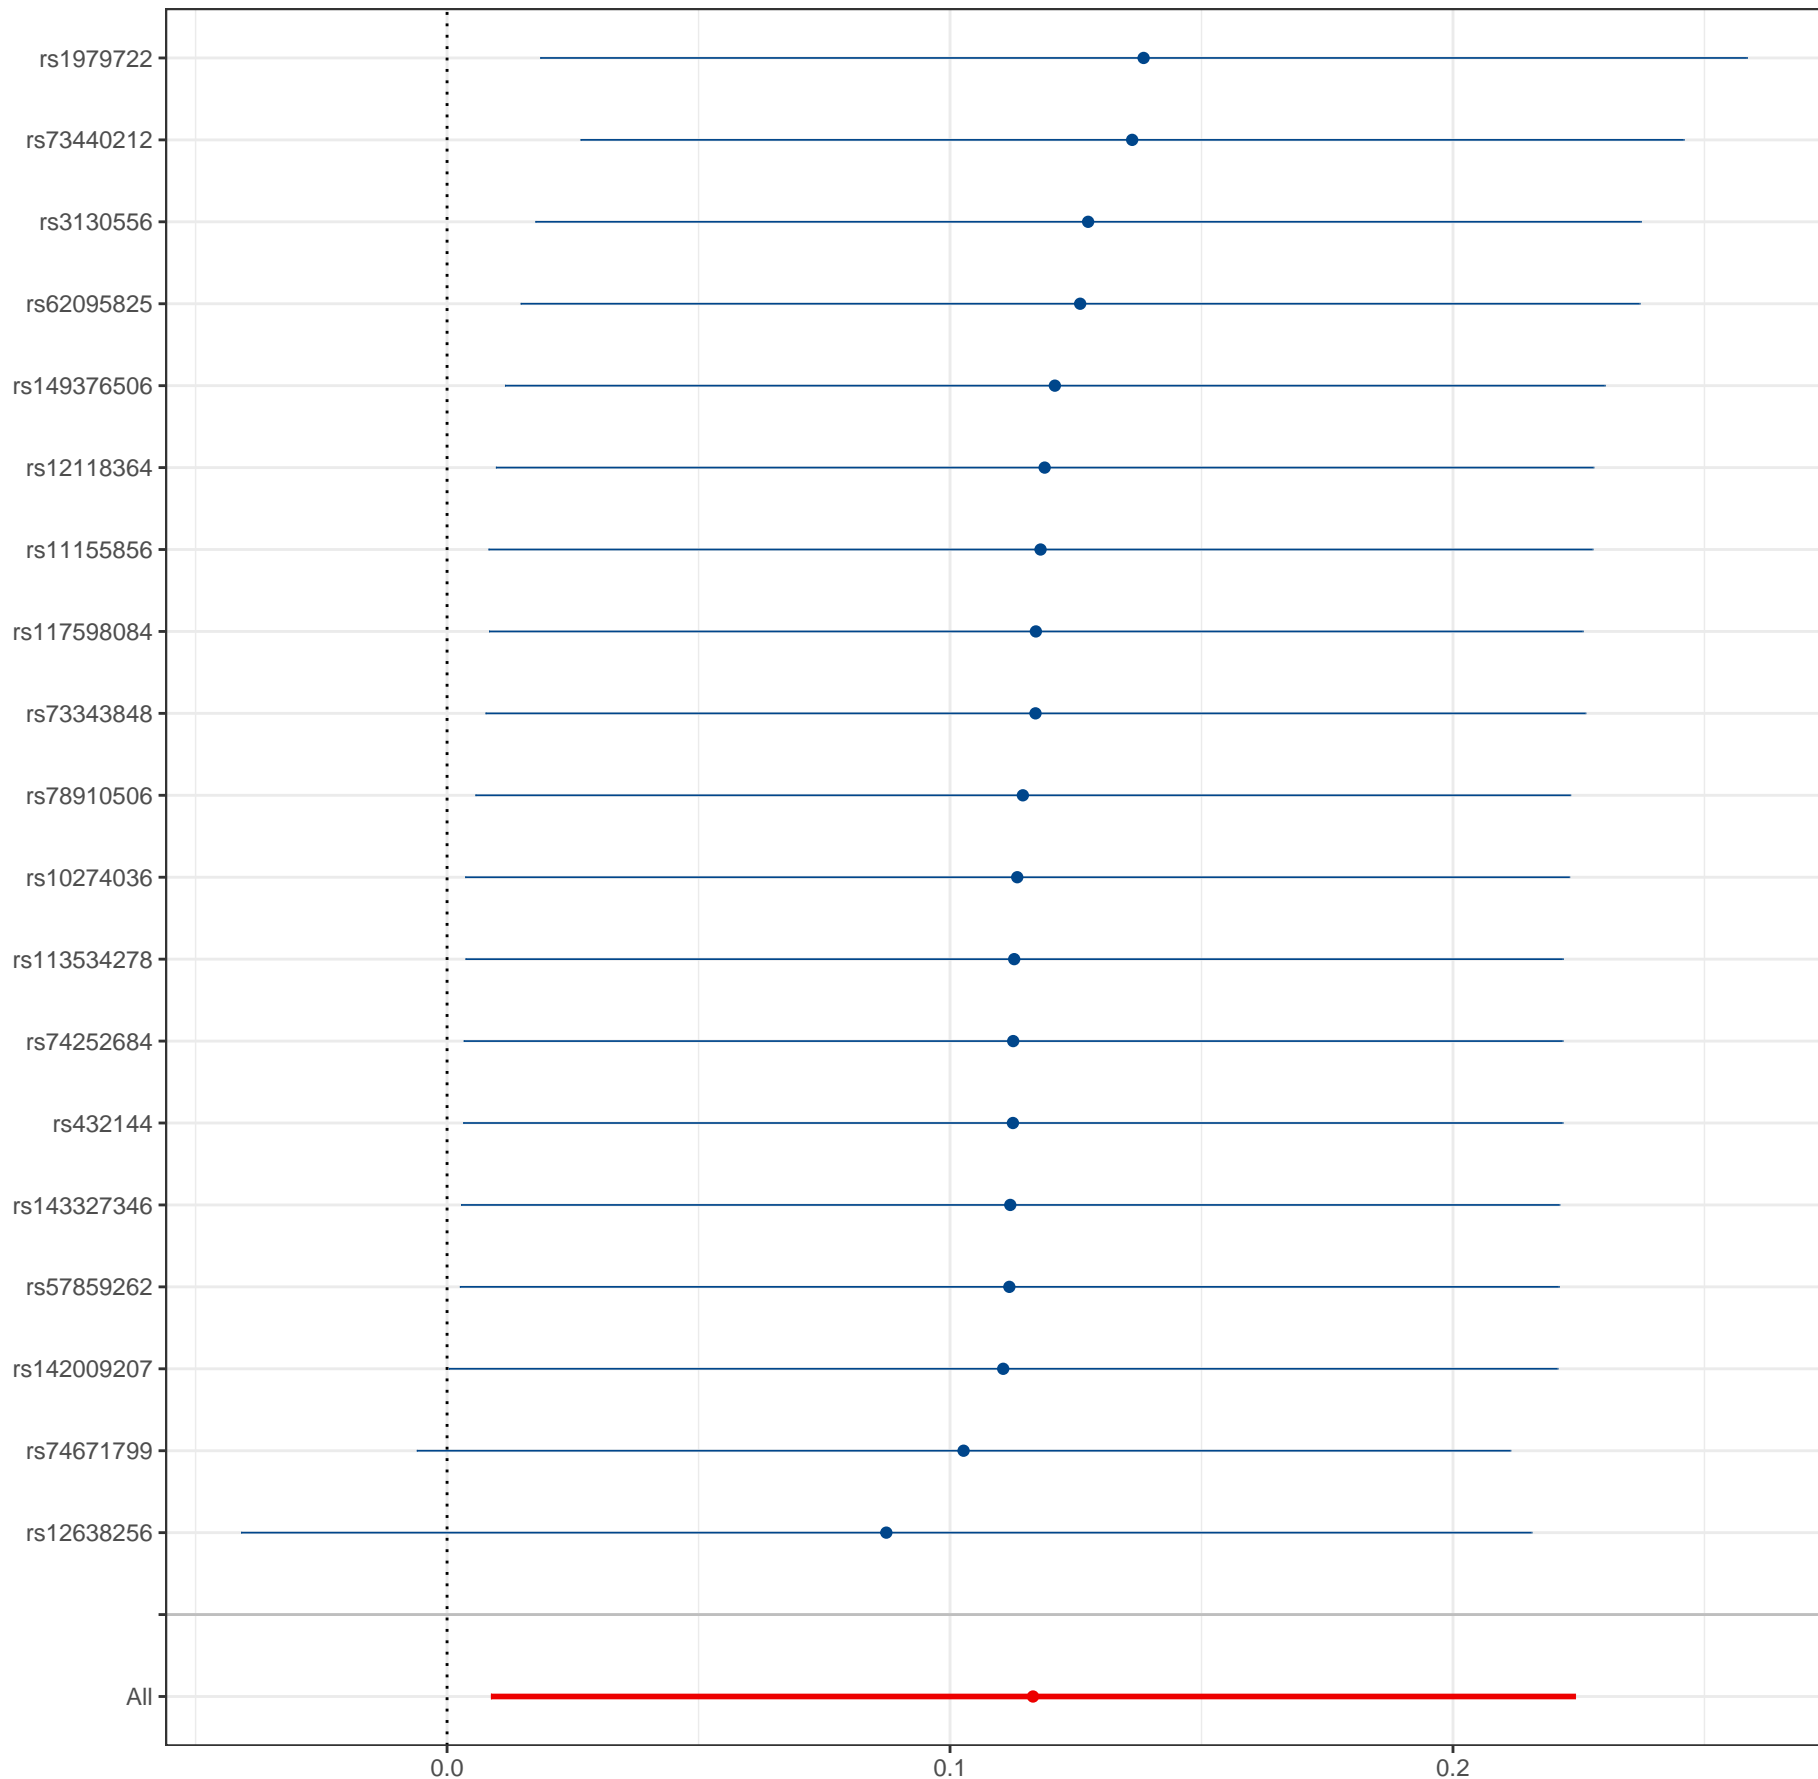

MR leave-one-out sensitivity analysis for '1-stearoyl-2-oleoyl-GPI (18:0/18:1) levels' on 'Parkinson's disease || id:ieu-b-7'

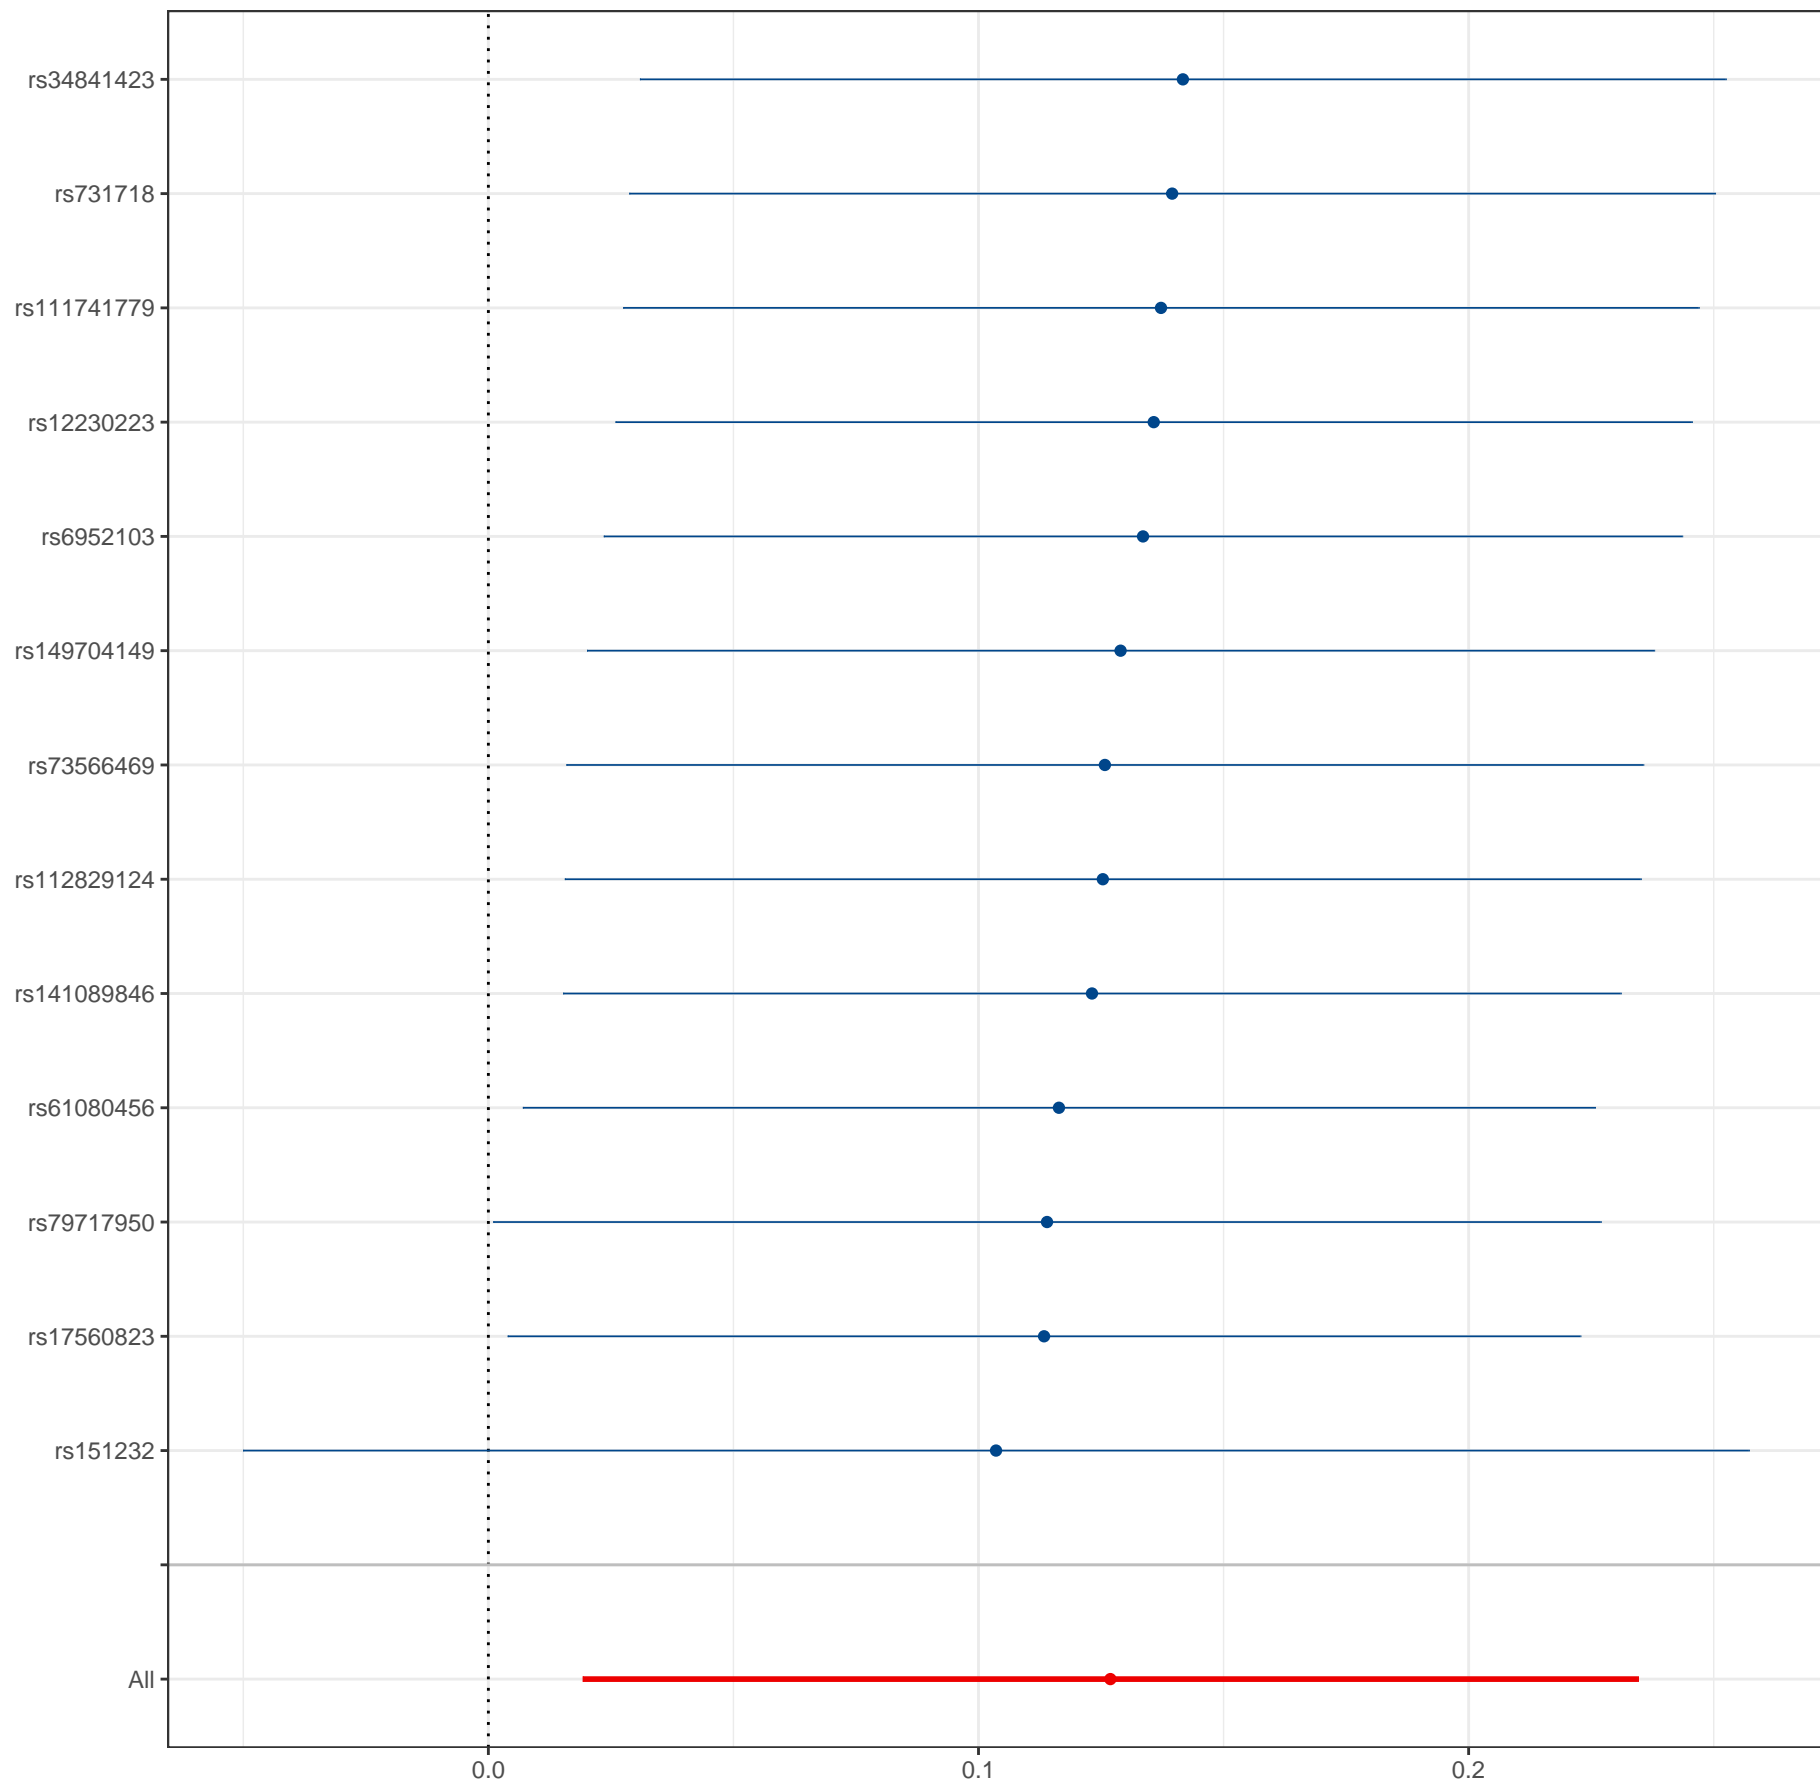

MR leave-one-out sensitivity analysis for 'Furaneol sulfate levels' on 'Parkinson's disease || id:i eu-b-7'

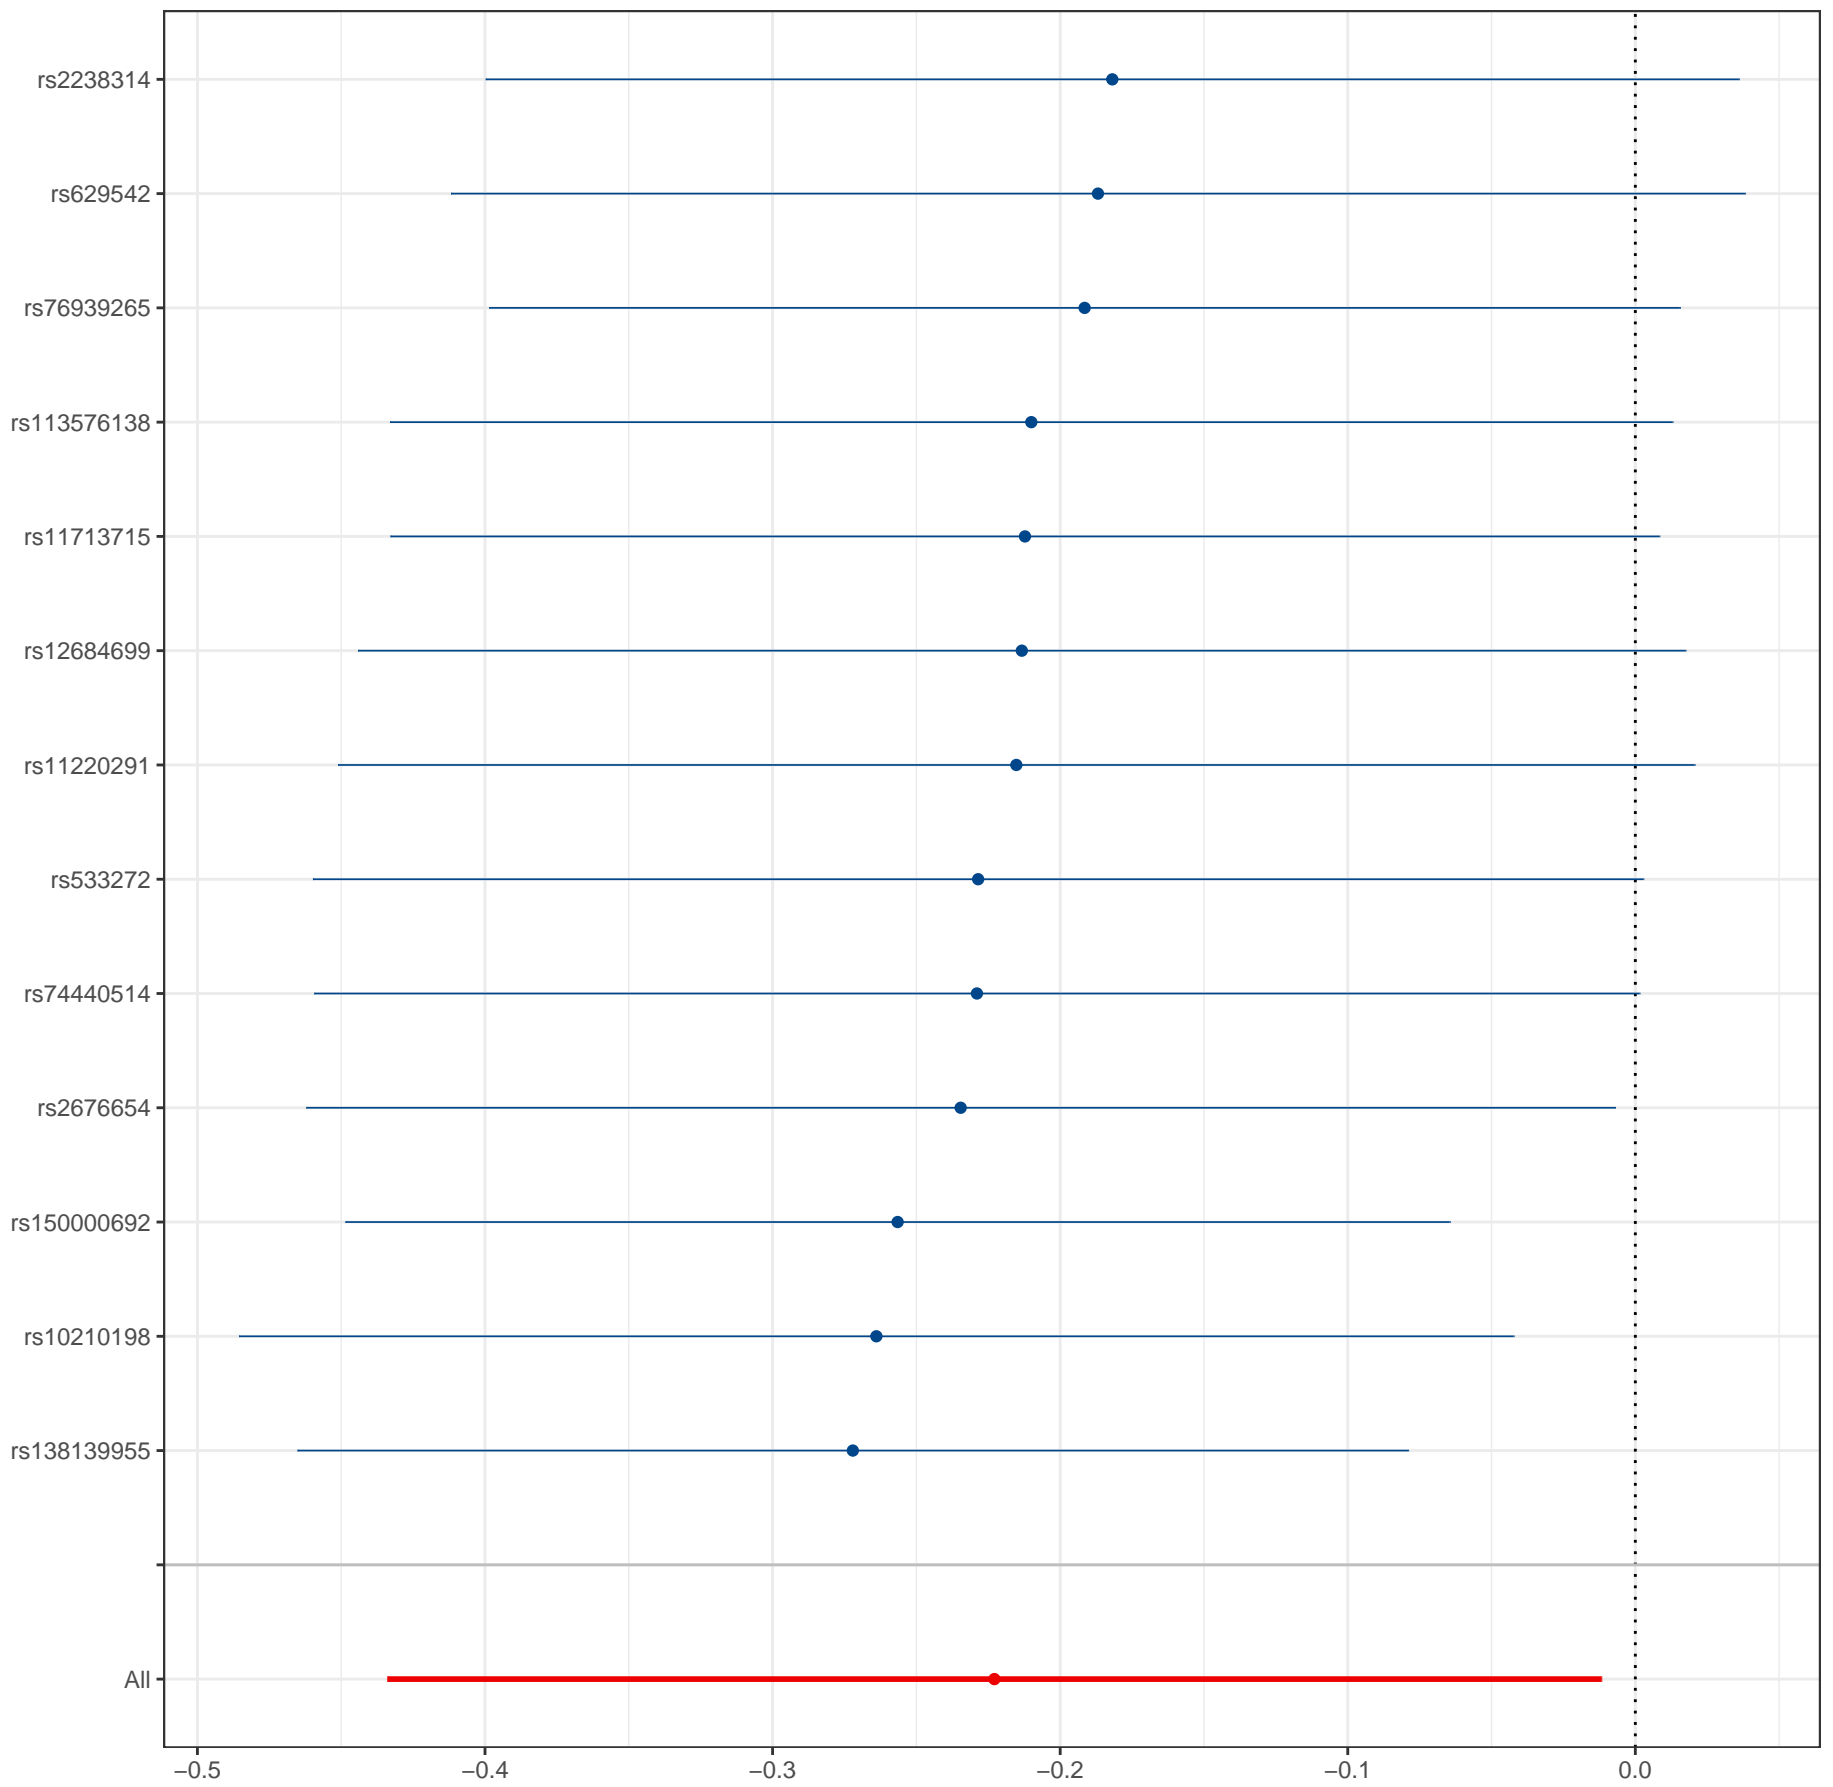

MR leave-one-out sensitivity analysis for '2,3-dihydroxy-2-methylbutyrate levels' on 'Parkinson's disease || id:ieu-b-7'

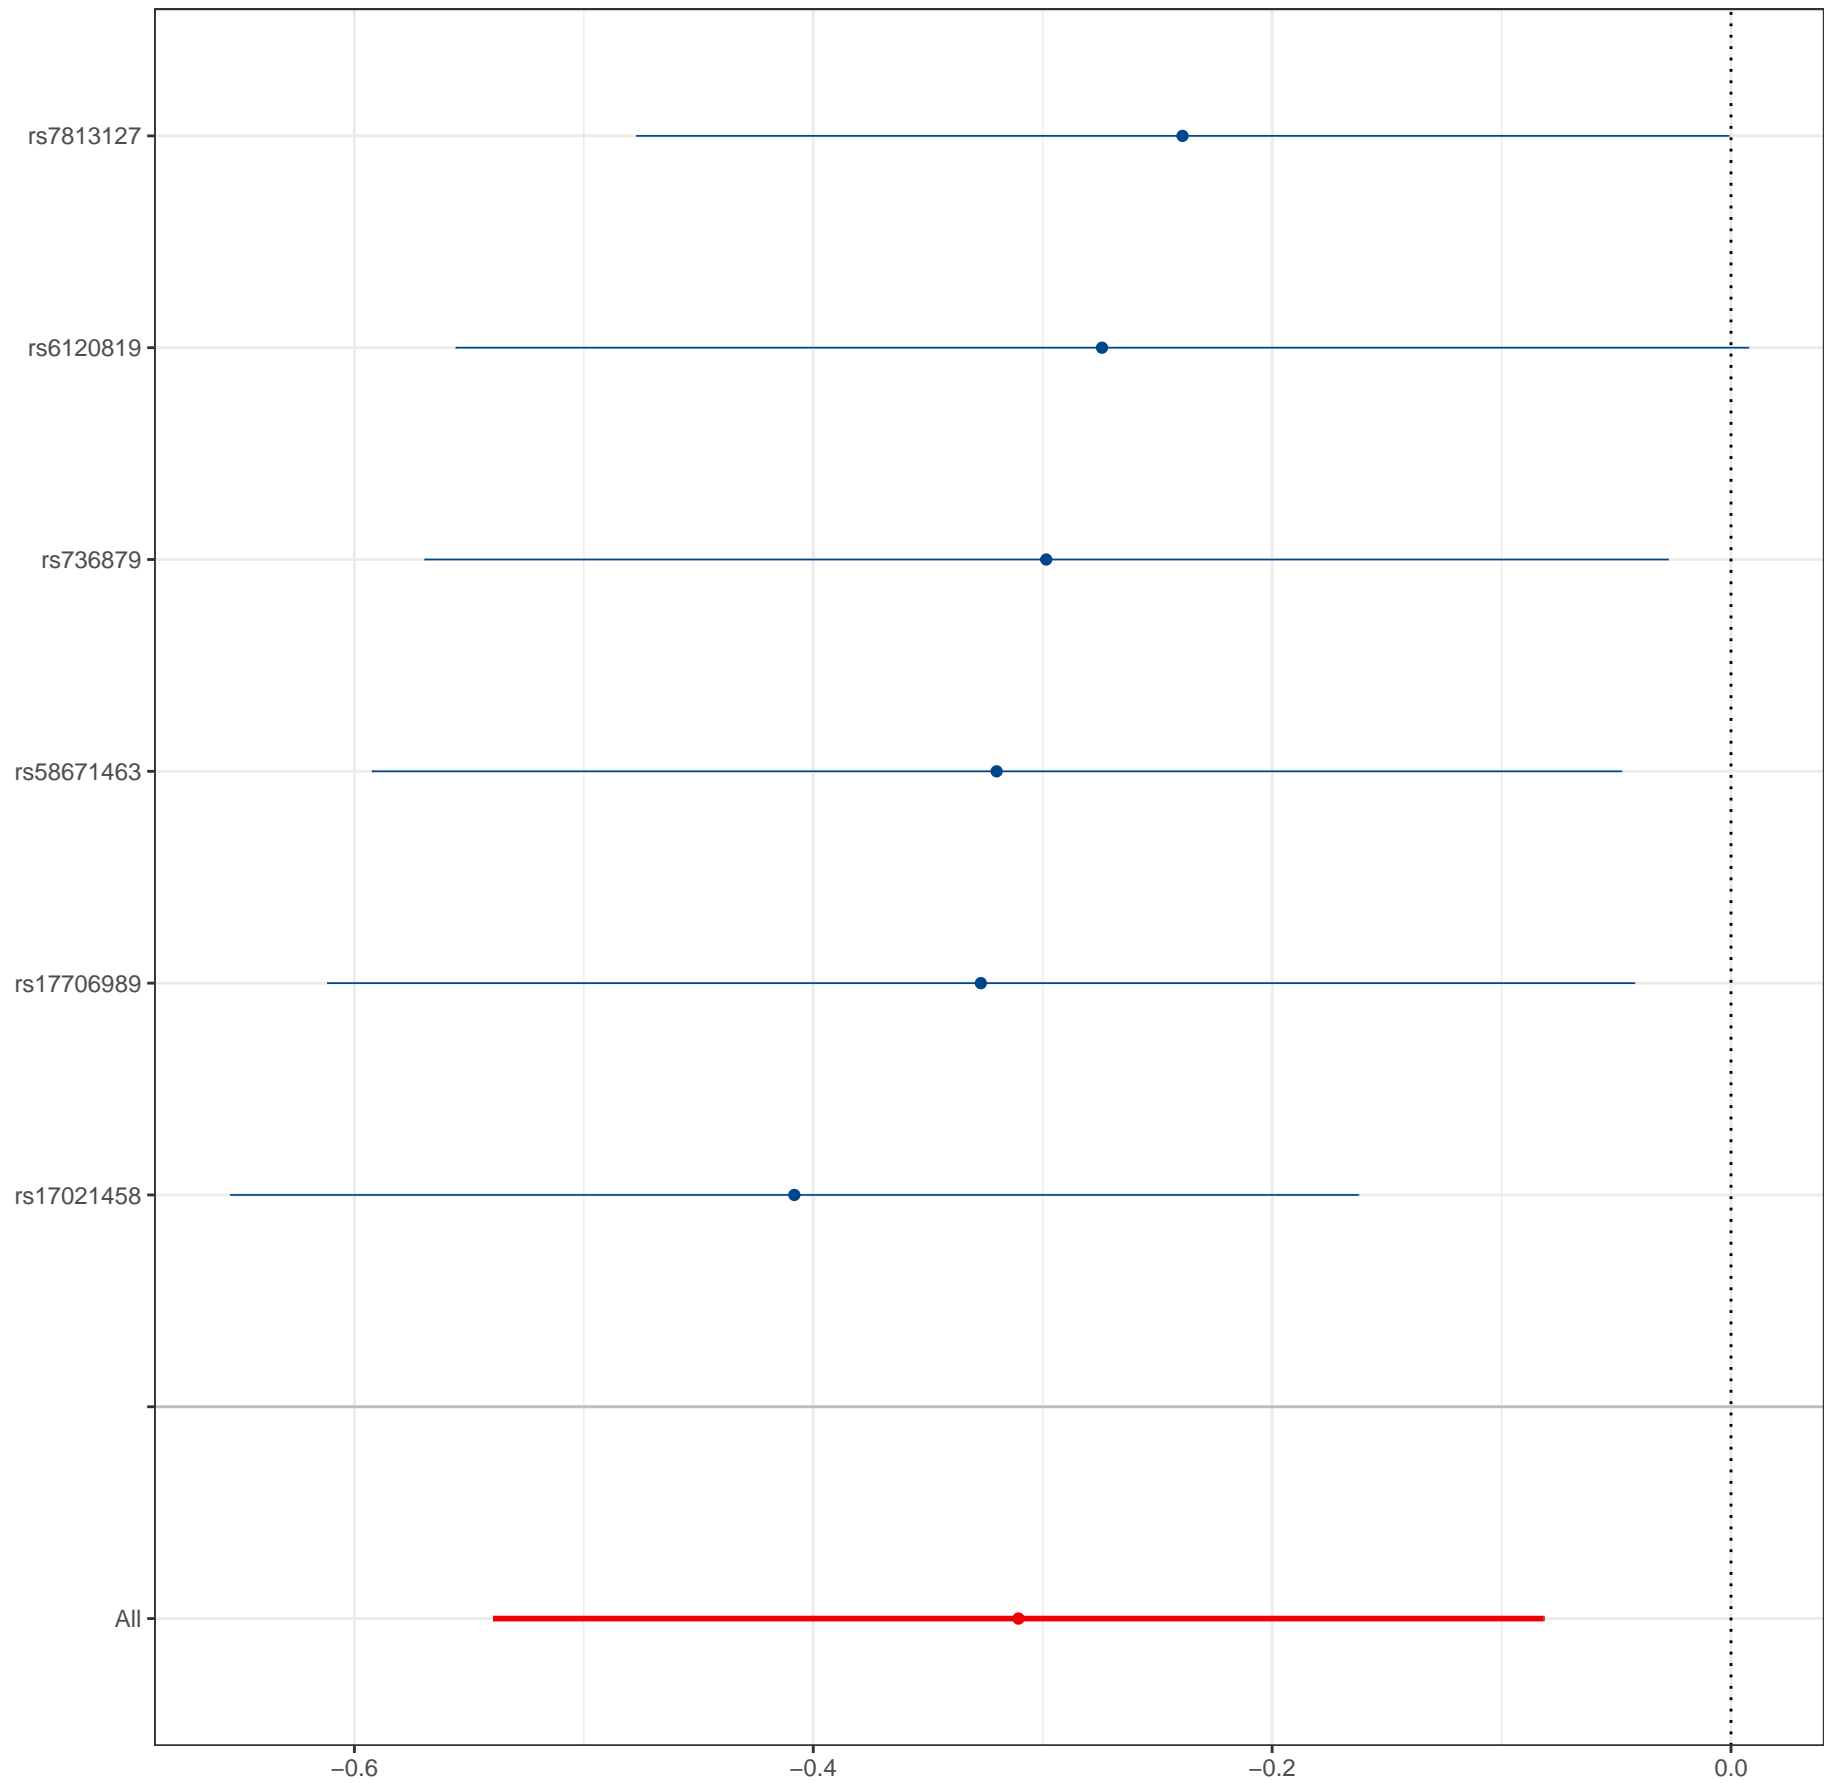

MR leave-one-out sensitivity analysis for  
'Linoleoylcholine levels' on 'Parkinson's disease || id:ieu-b-7'

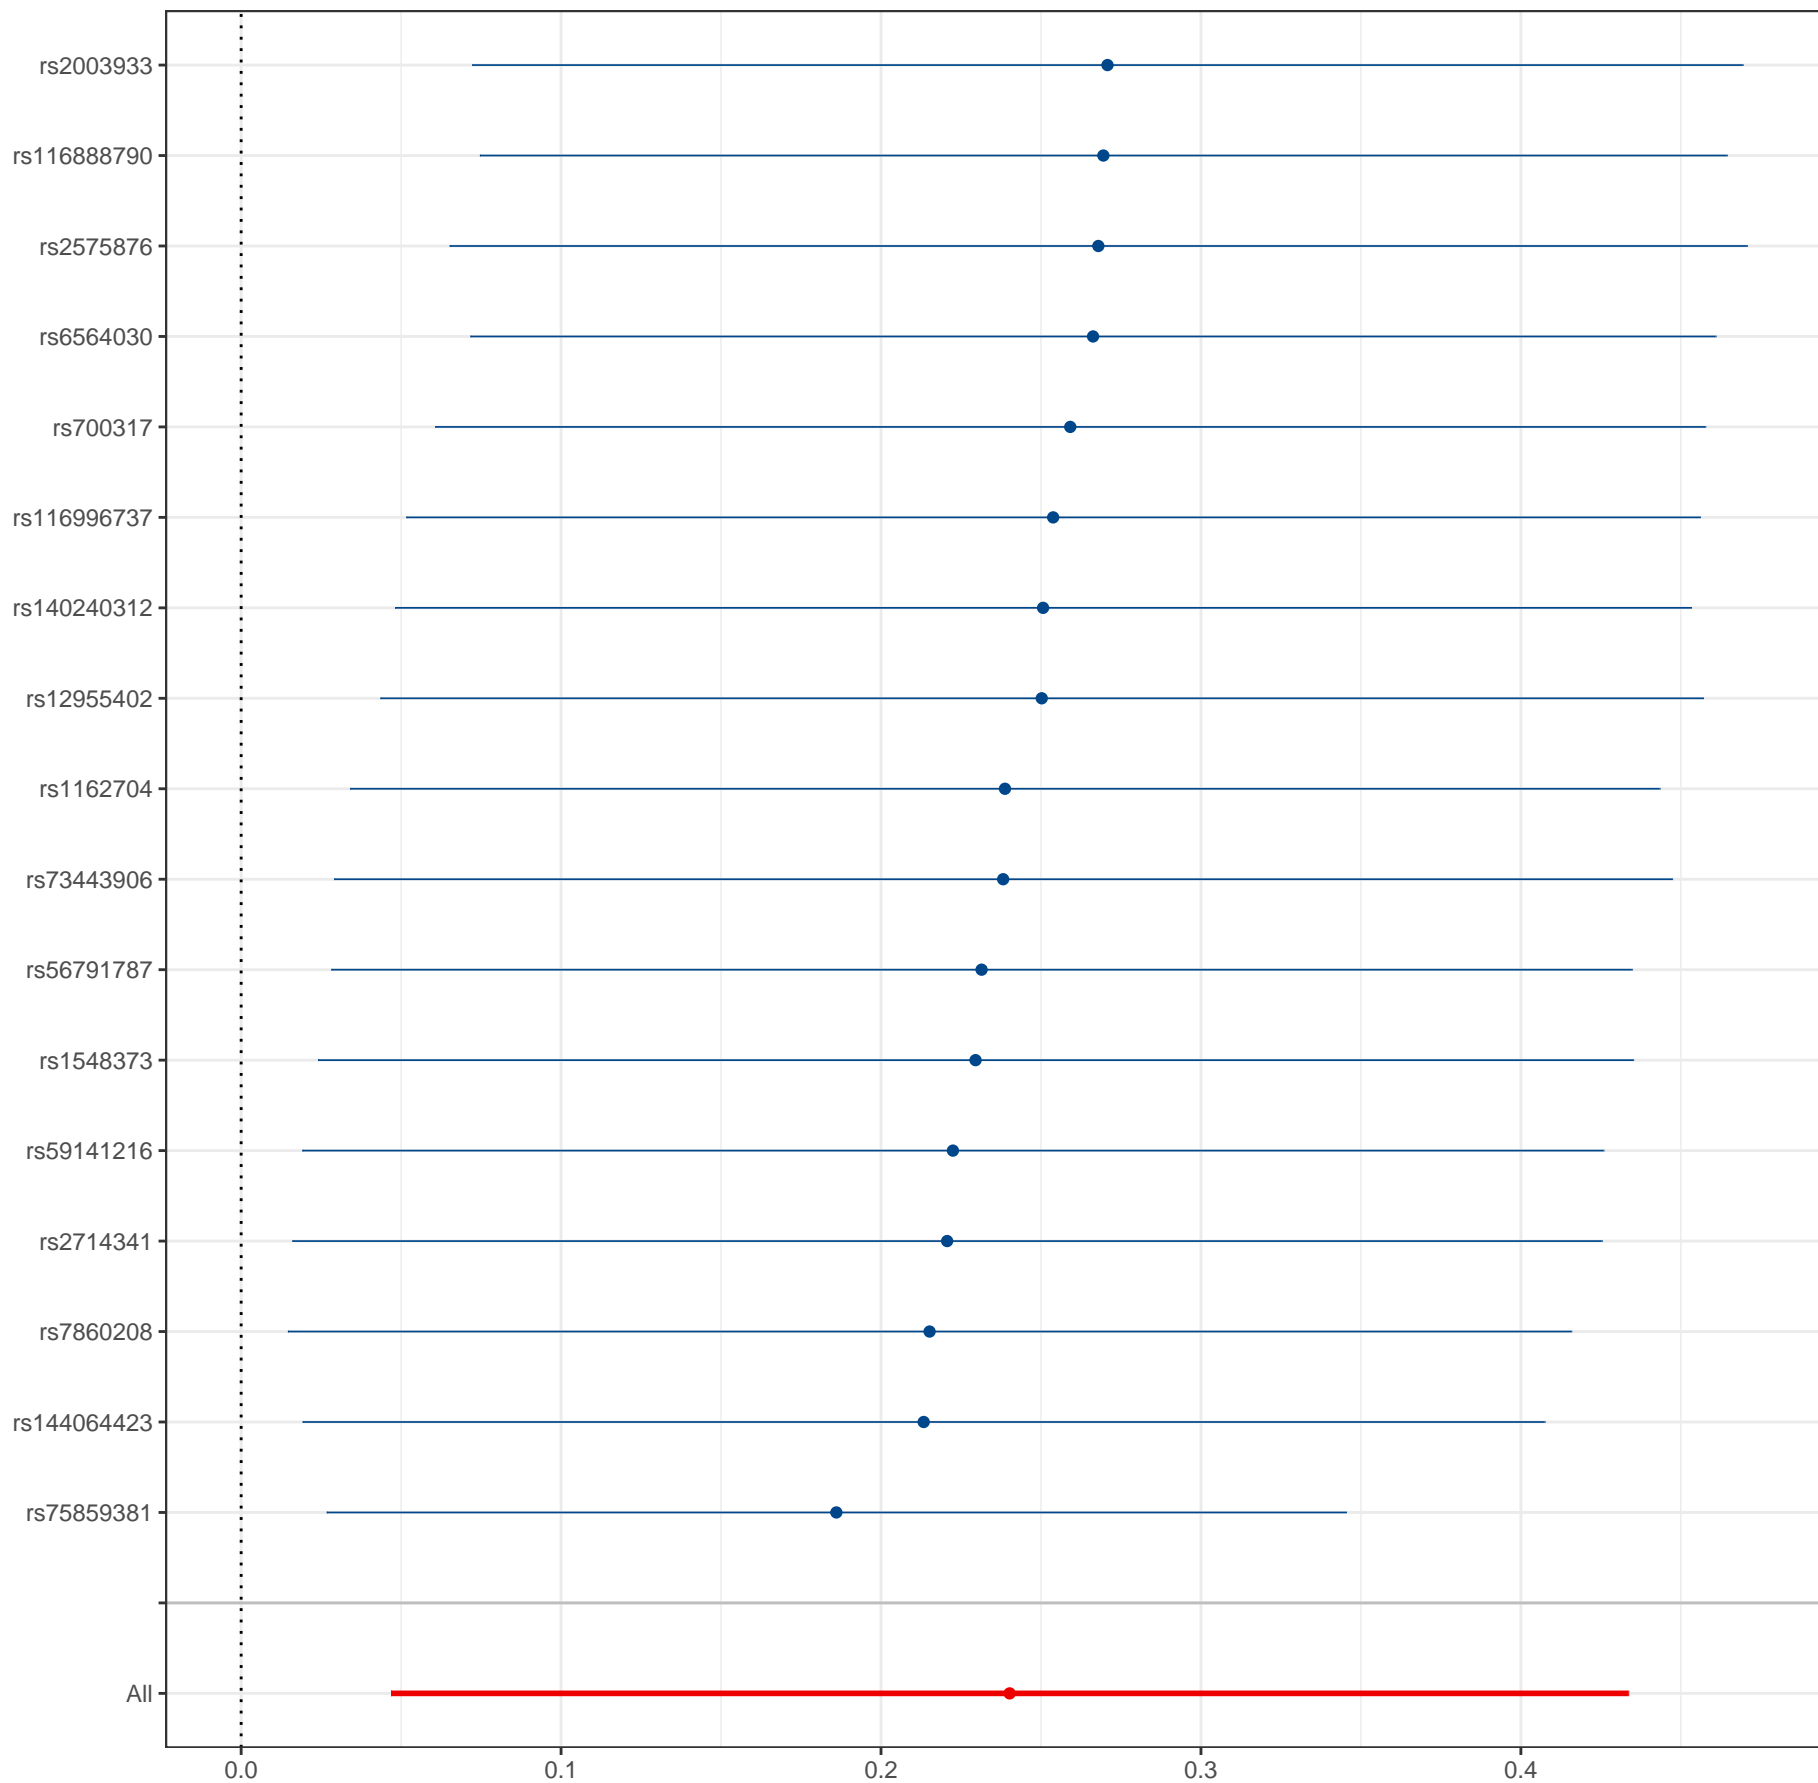

MR leave-one-out sensitivity analysis for 'Glycosyl ceramide (d18:1/20:0, d16:1/22:0) levels' on 'Parkinson's disease || id:i eu-b-7'

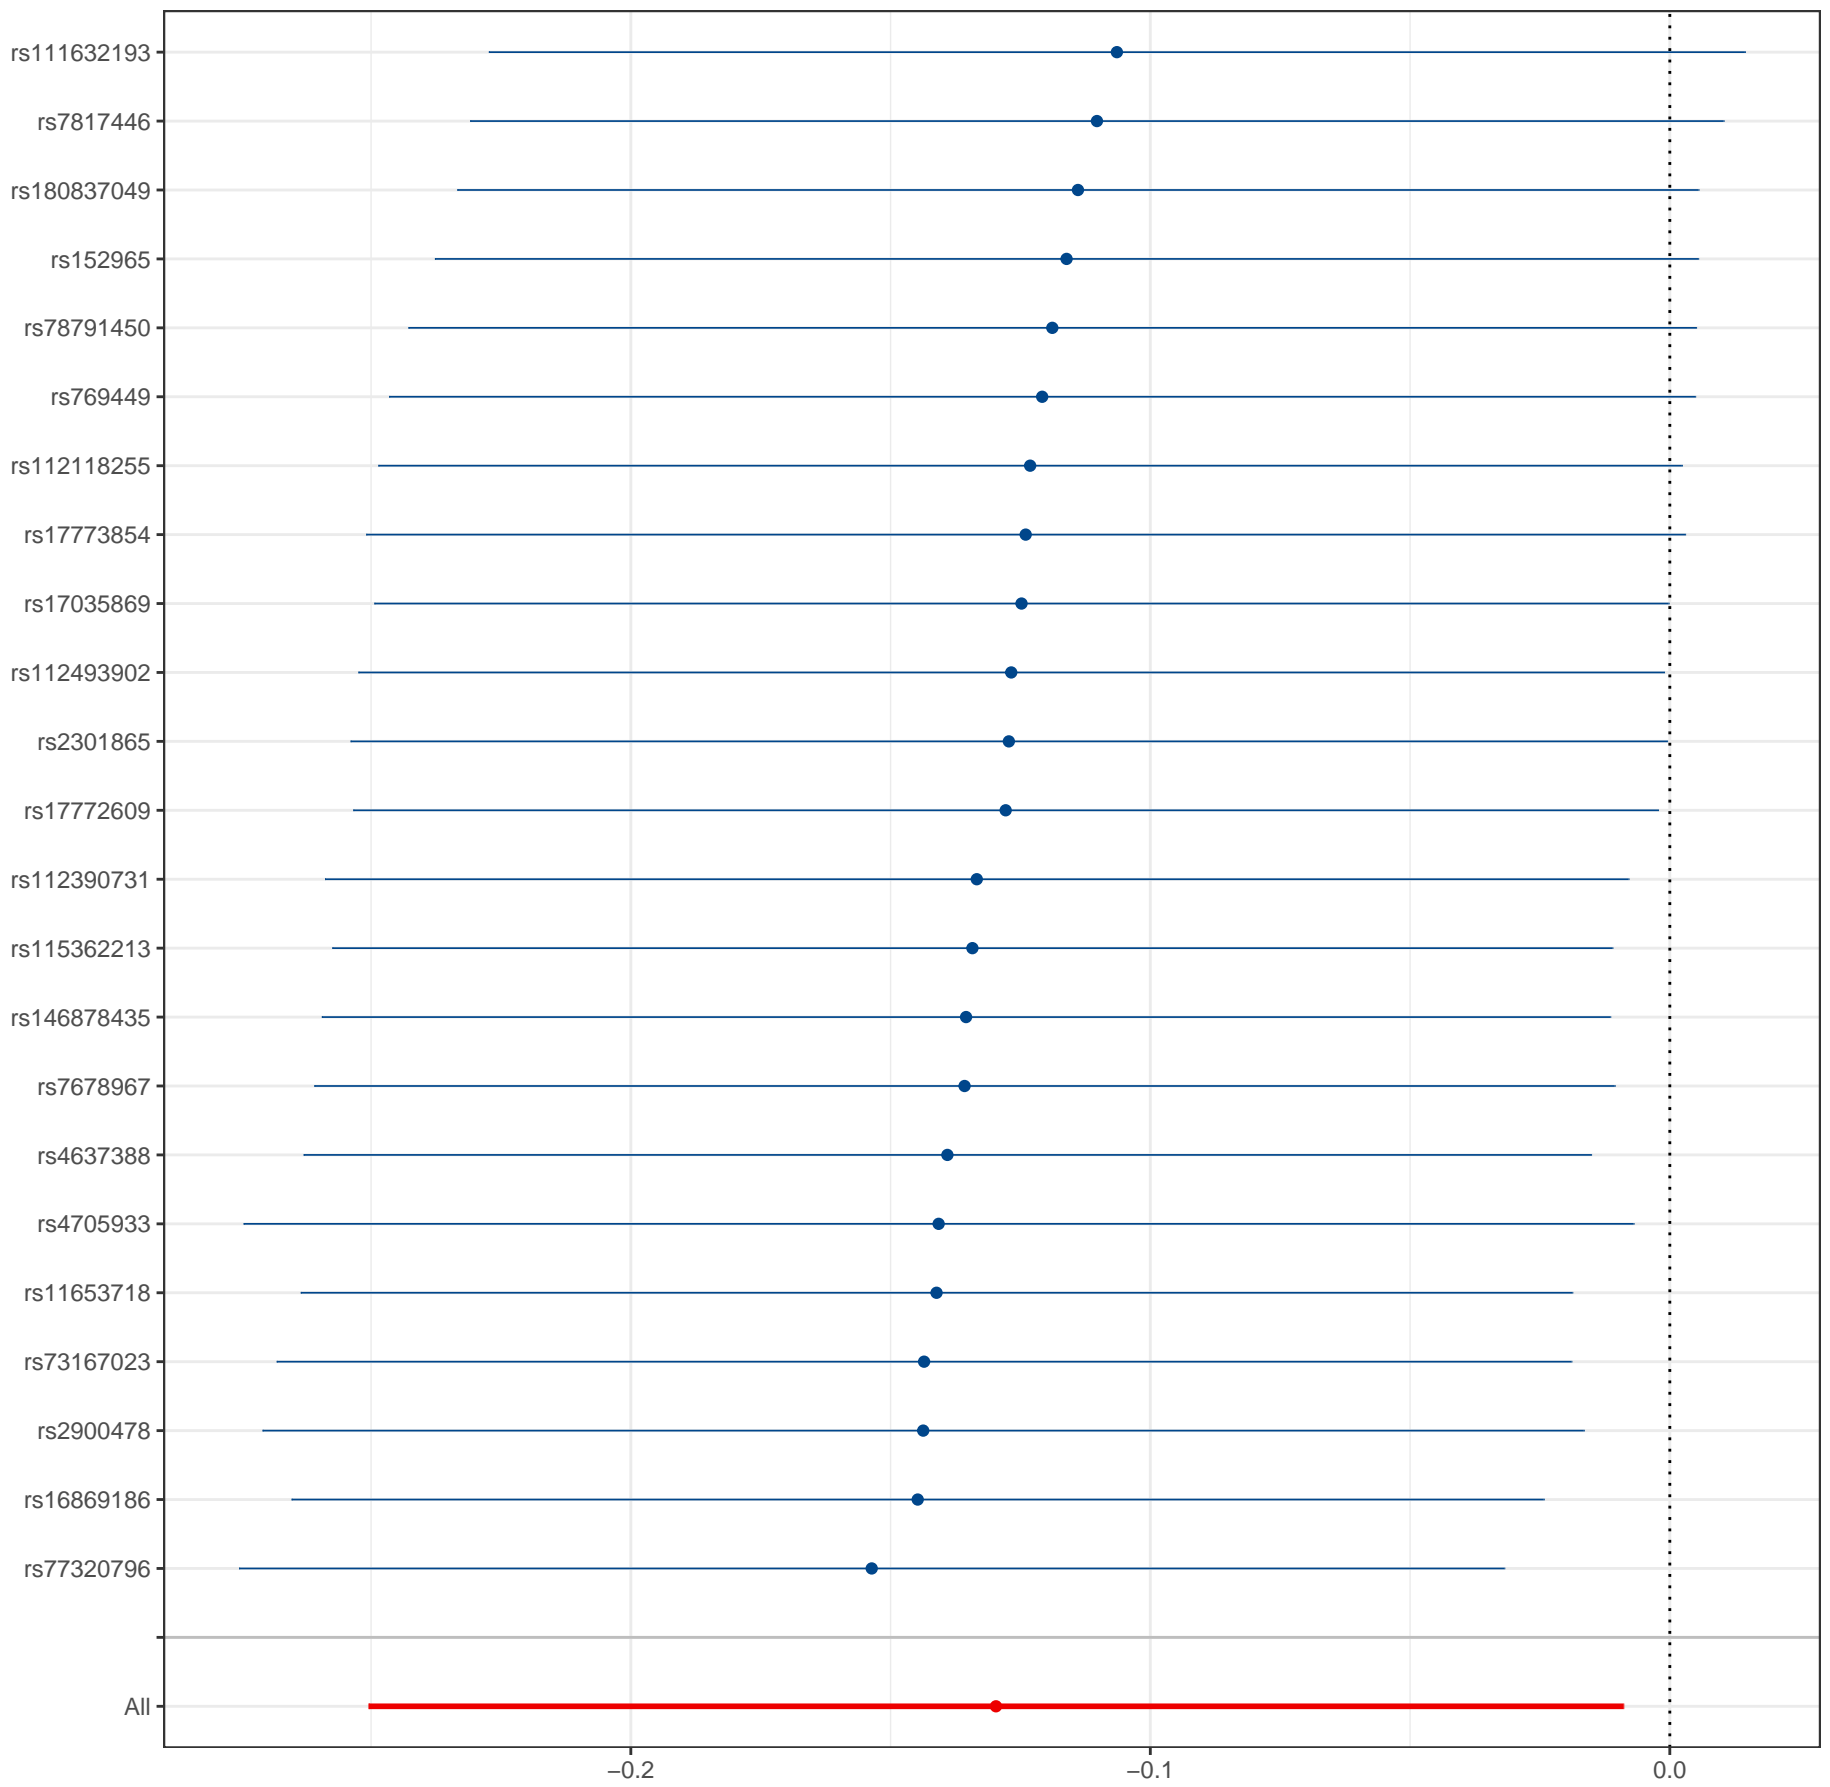

MR leave-one-out sensitivity analysis for 'Eicosenoylcarnitine (C20:1) levels' on 'Parkinson's disease || id:ieu-b-7'

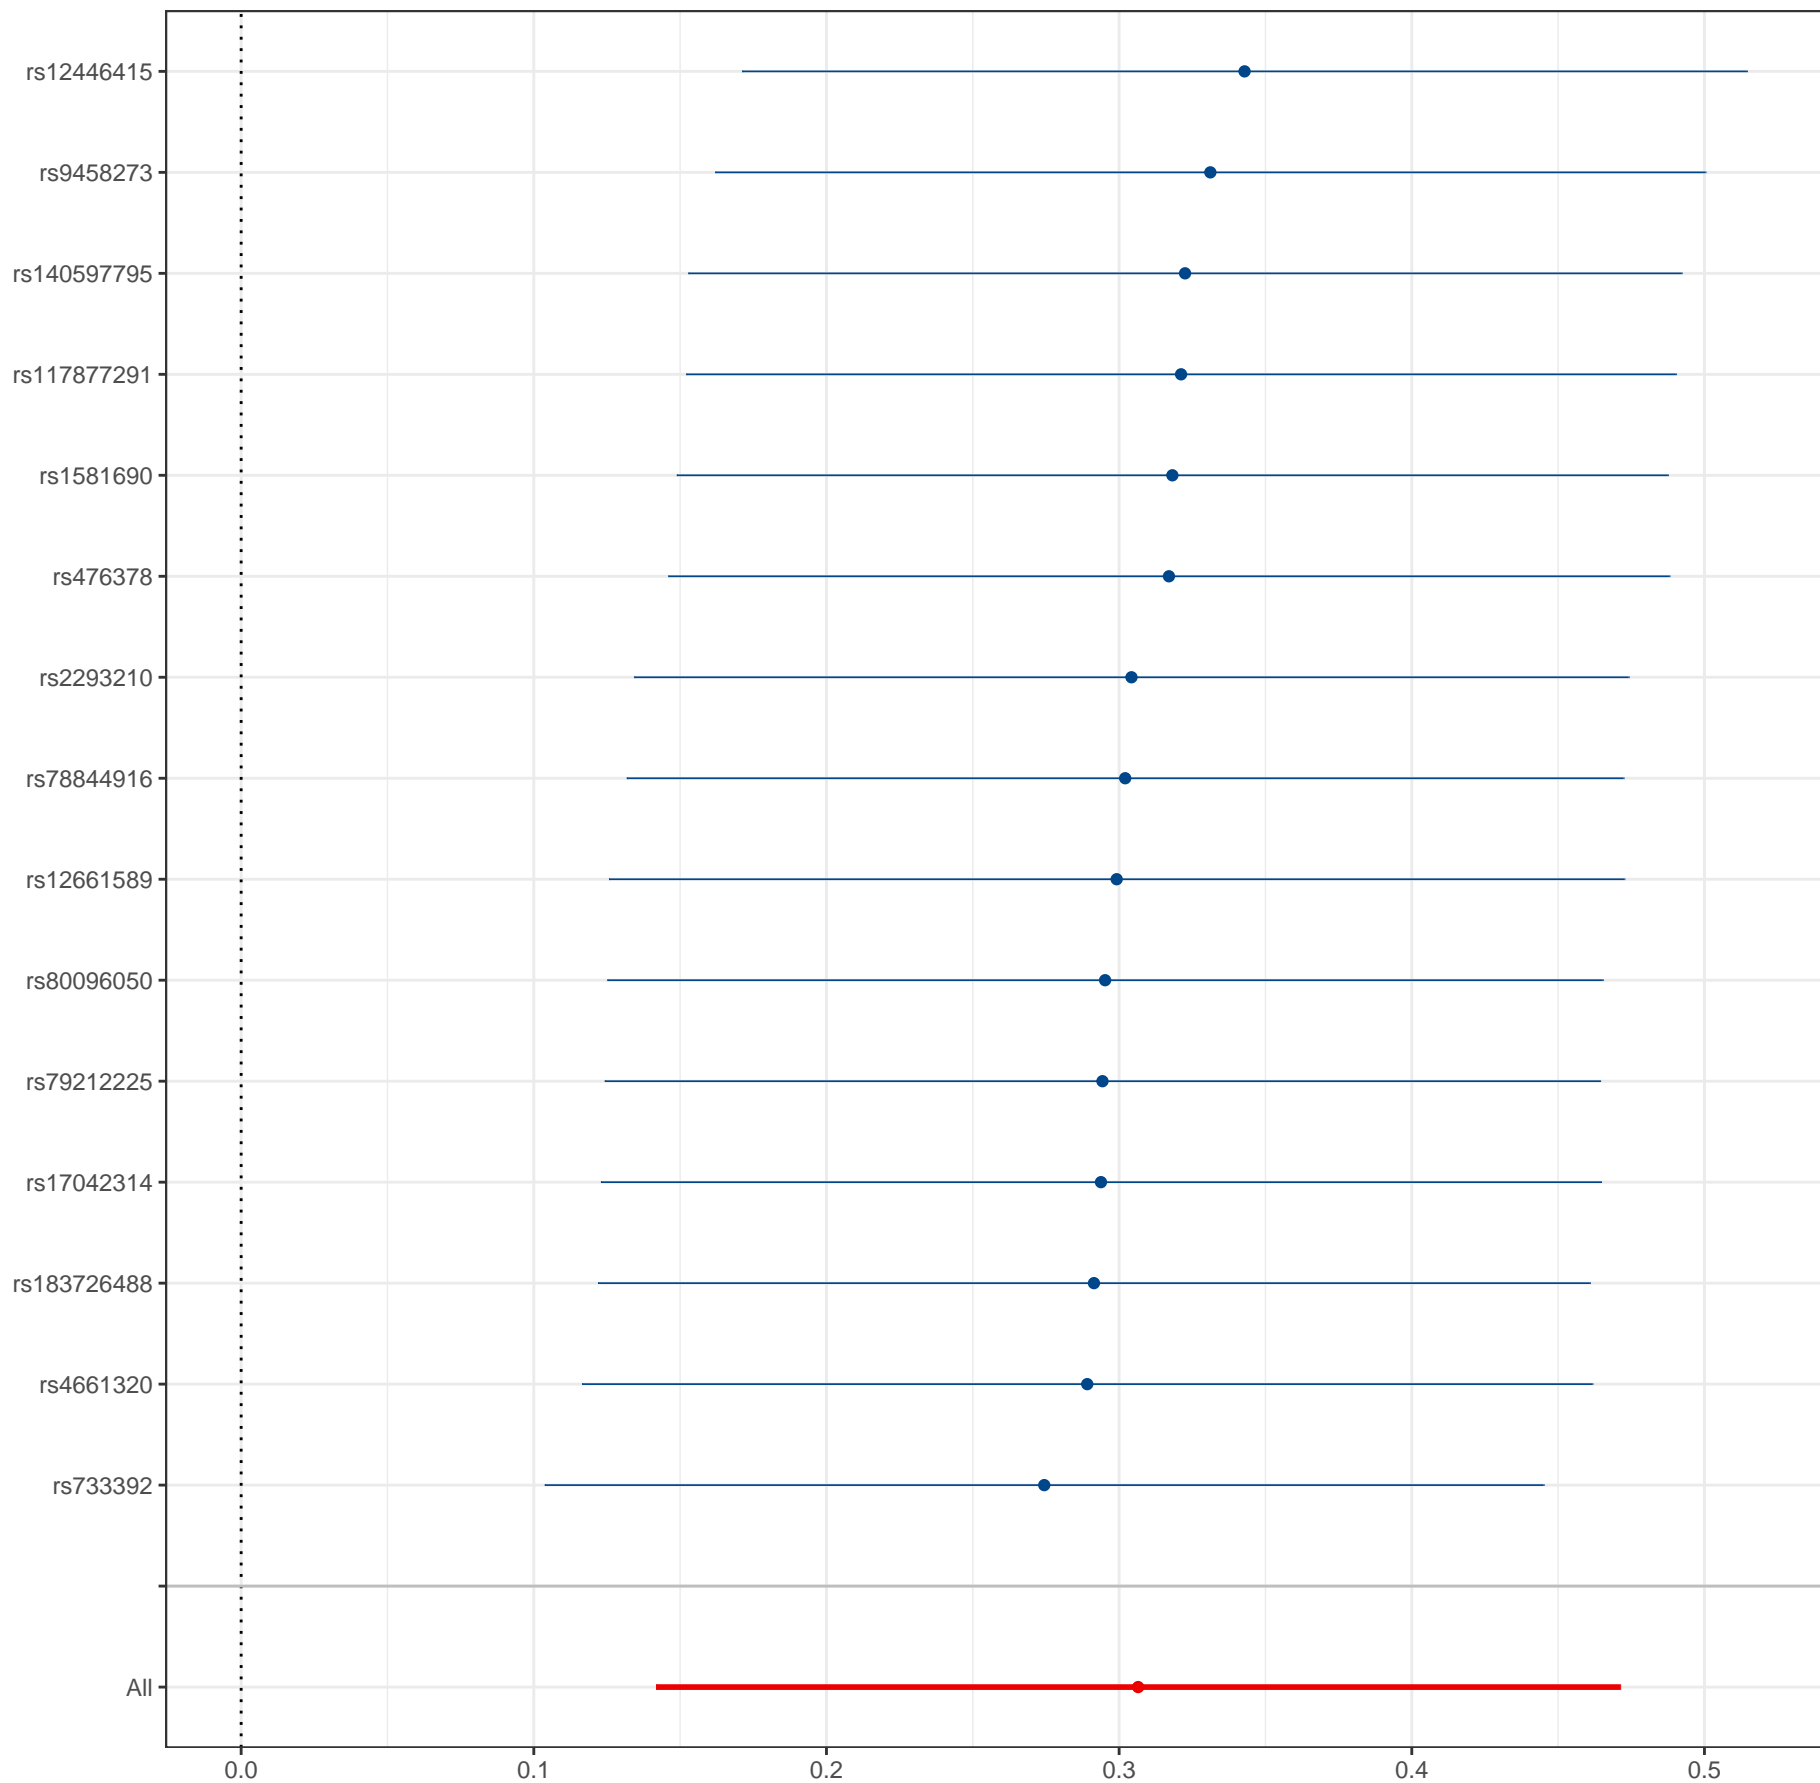

MR leave-one-out sensitivity analysis for 'Hydroxy-cmpf levels' on 'Parkinson's disease || id:ieu-b-7'



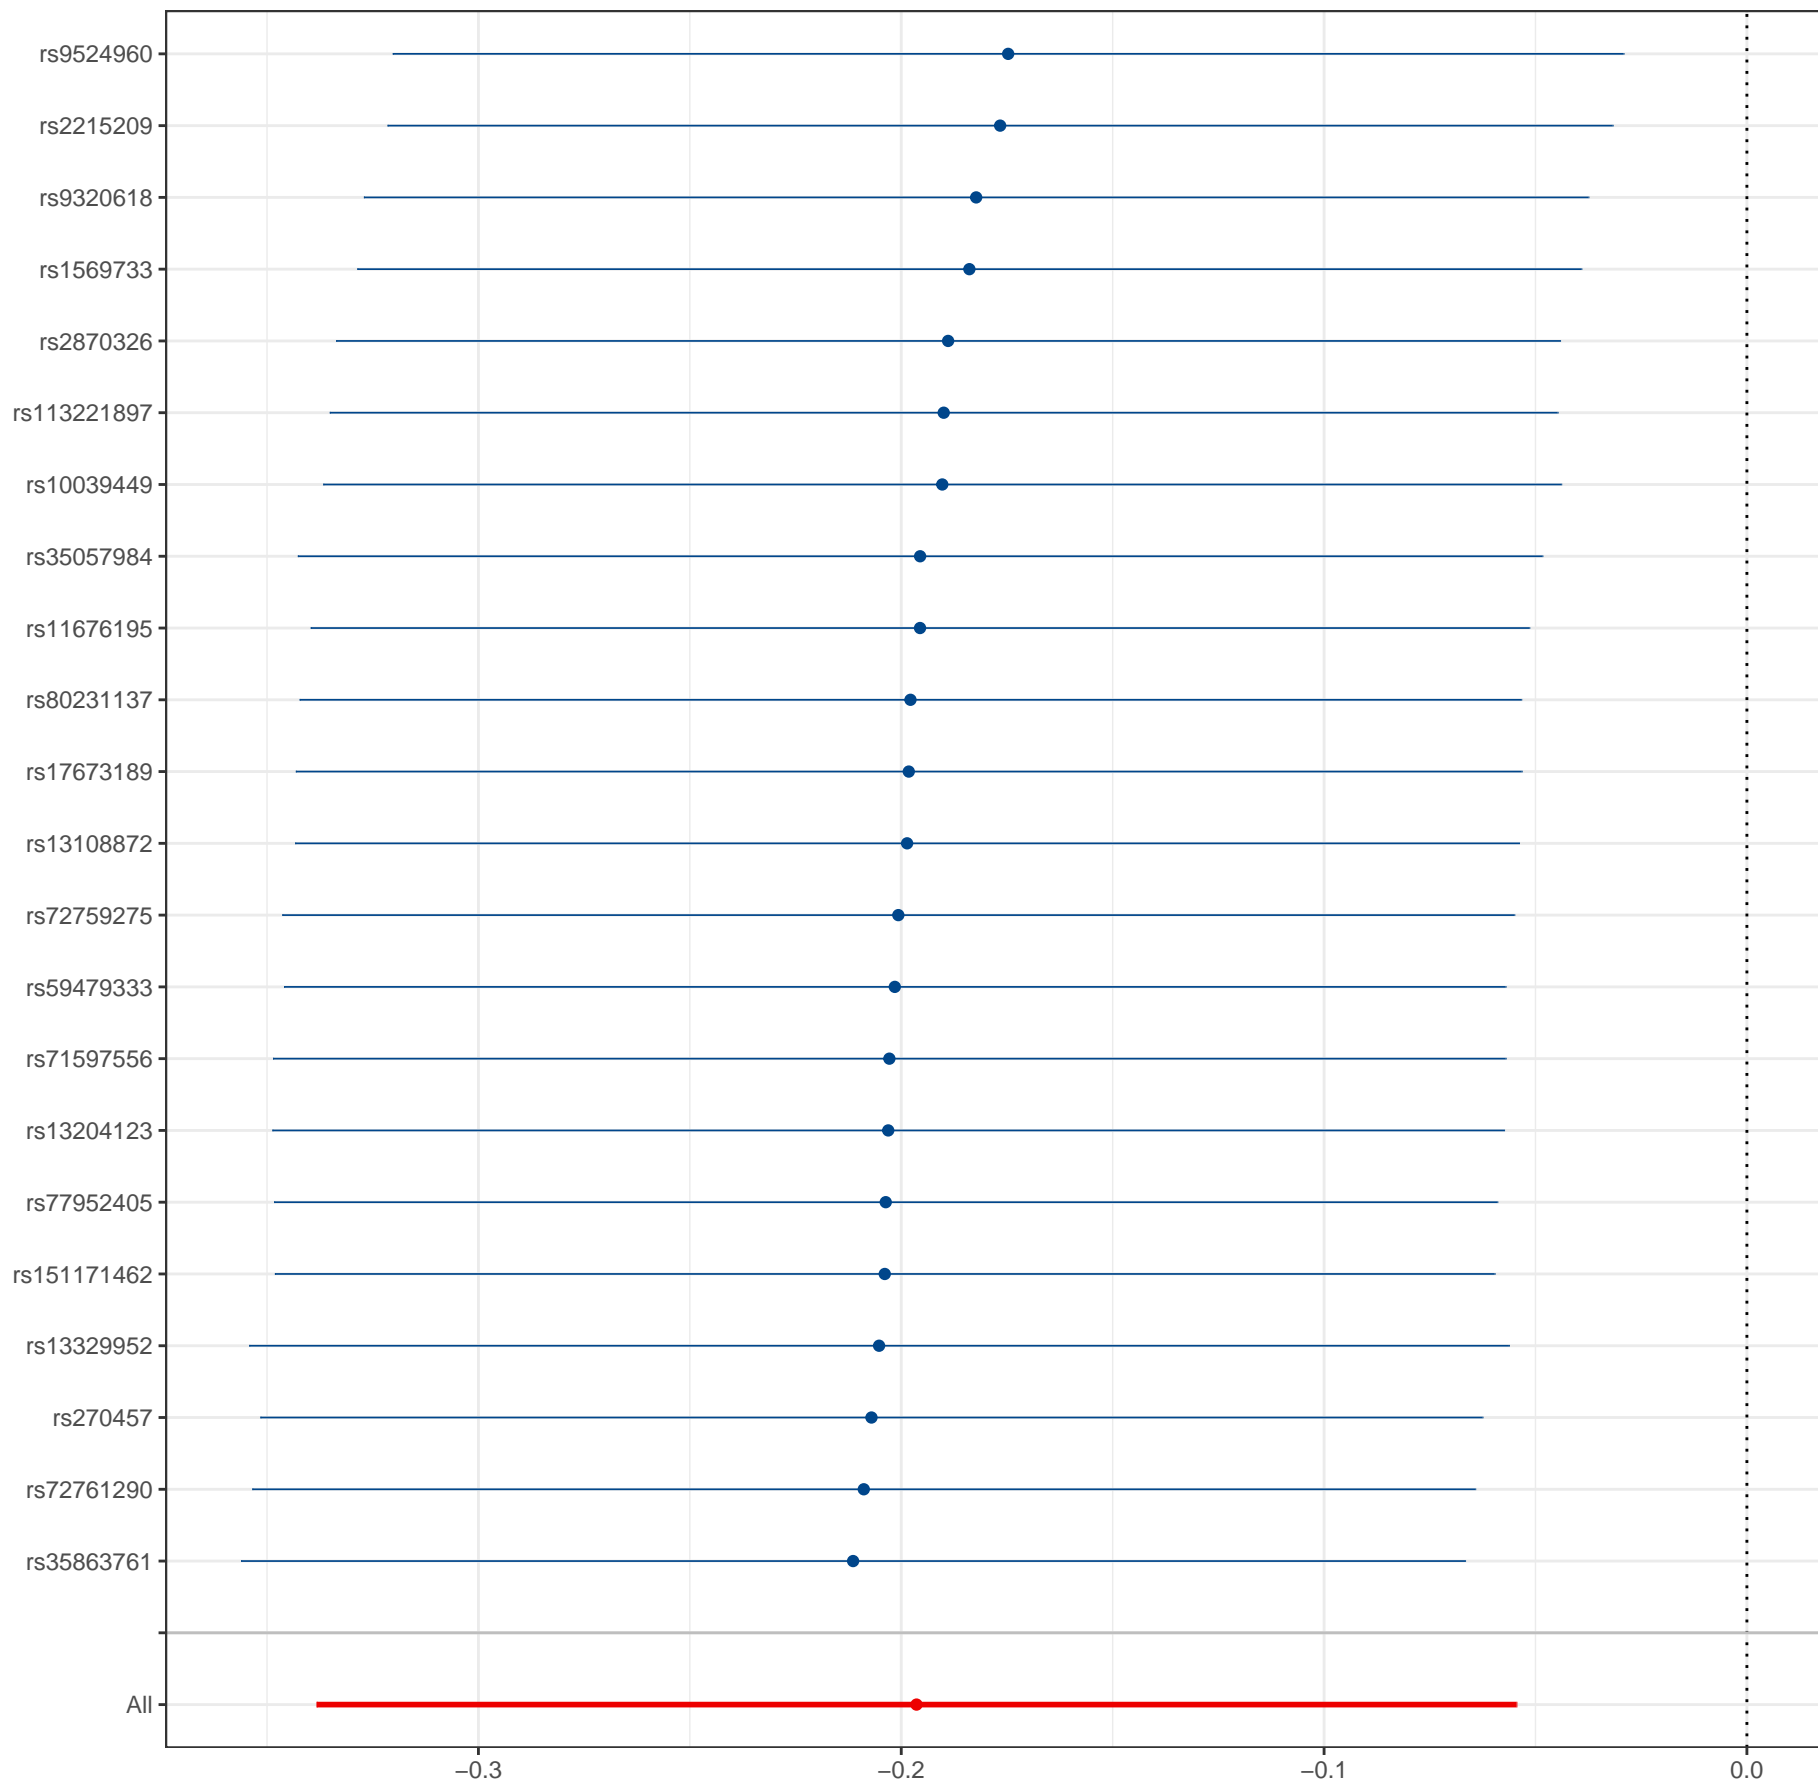

MR leave-one-out sensitivity analysis for 'N,n,n-trimethyl-alanylproline betaine (tmap) levels' on 'Parkinson's disease || id:ieu-b-7'

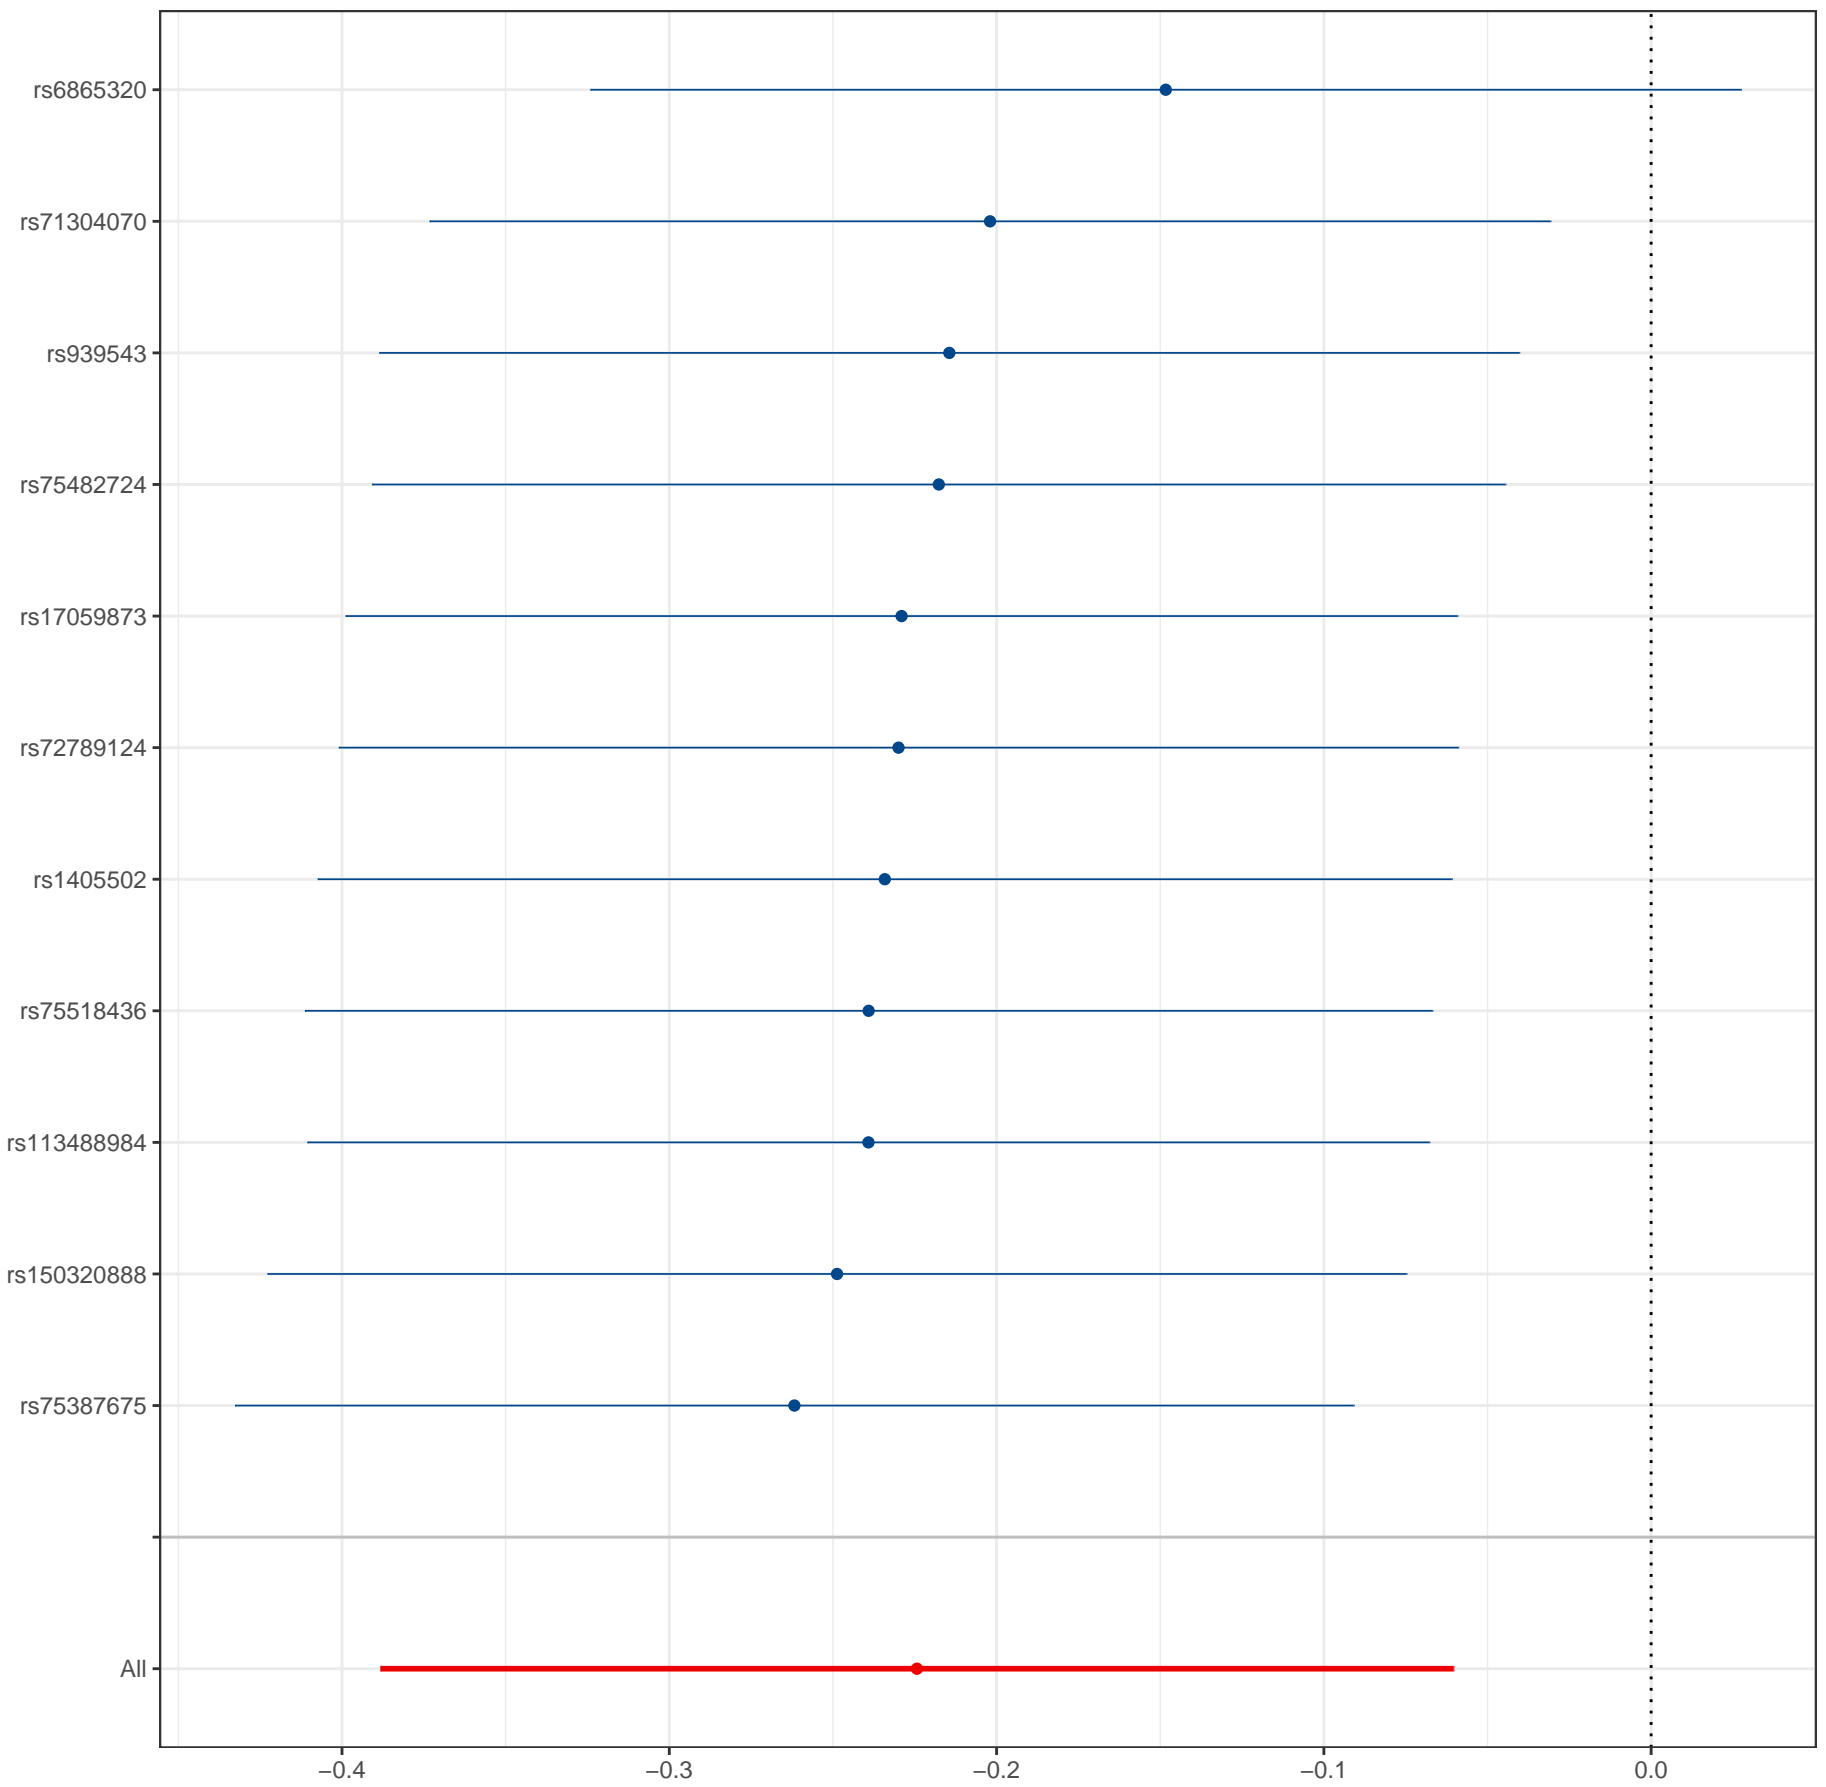

MR leave-one-out sensitivity analysis for 'Glucuronide of piperine metabolite C17H21NO3 (3) levels' on 'Parkinson's disease || id:ieu-b-7'

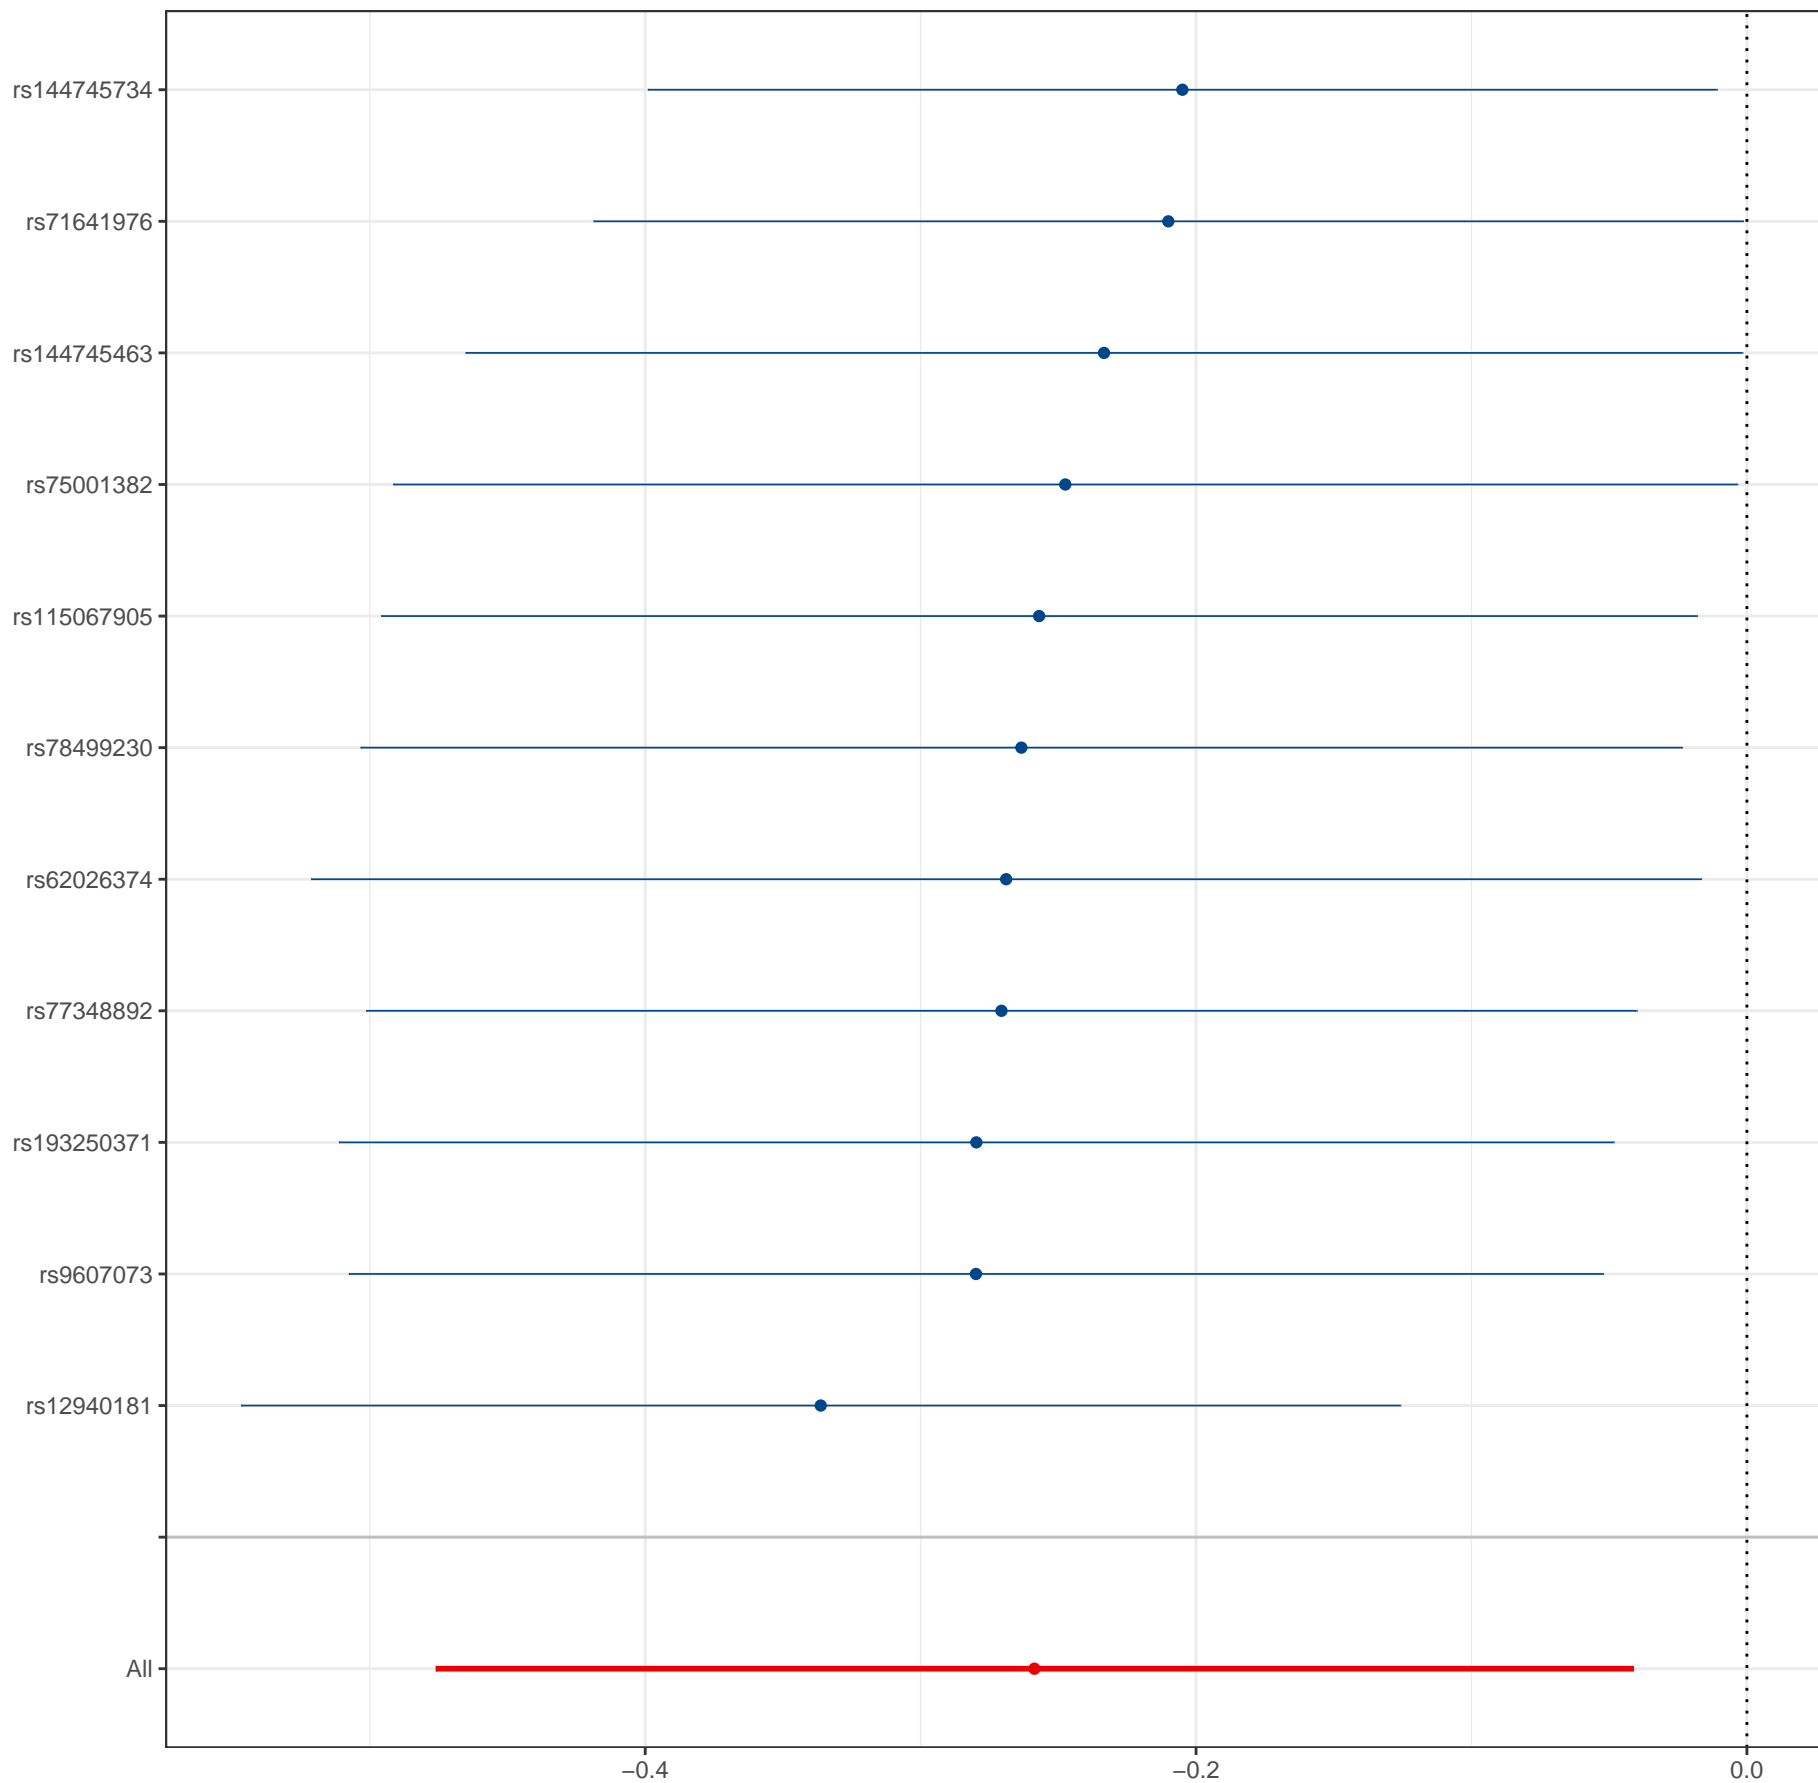

MR leave-one-out sensitivity analysis for '3-hydroxy-2-methylpyridine sulfate levels' on 'Parkinson's disease || id:ieu-b-7'

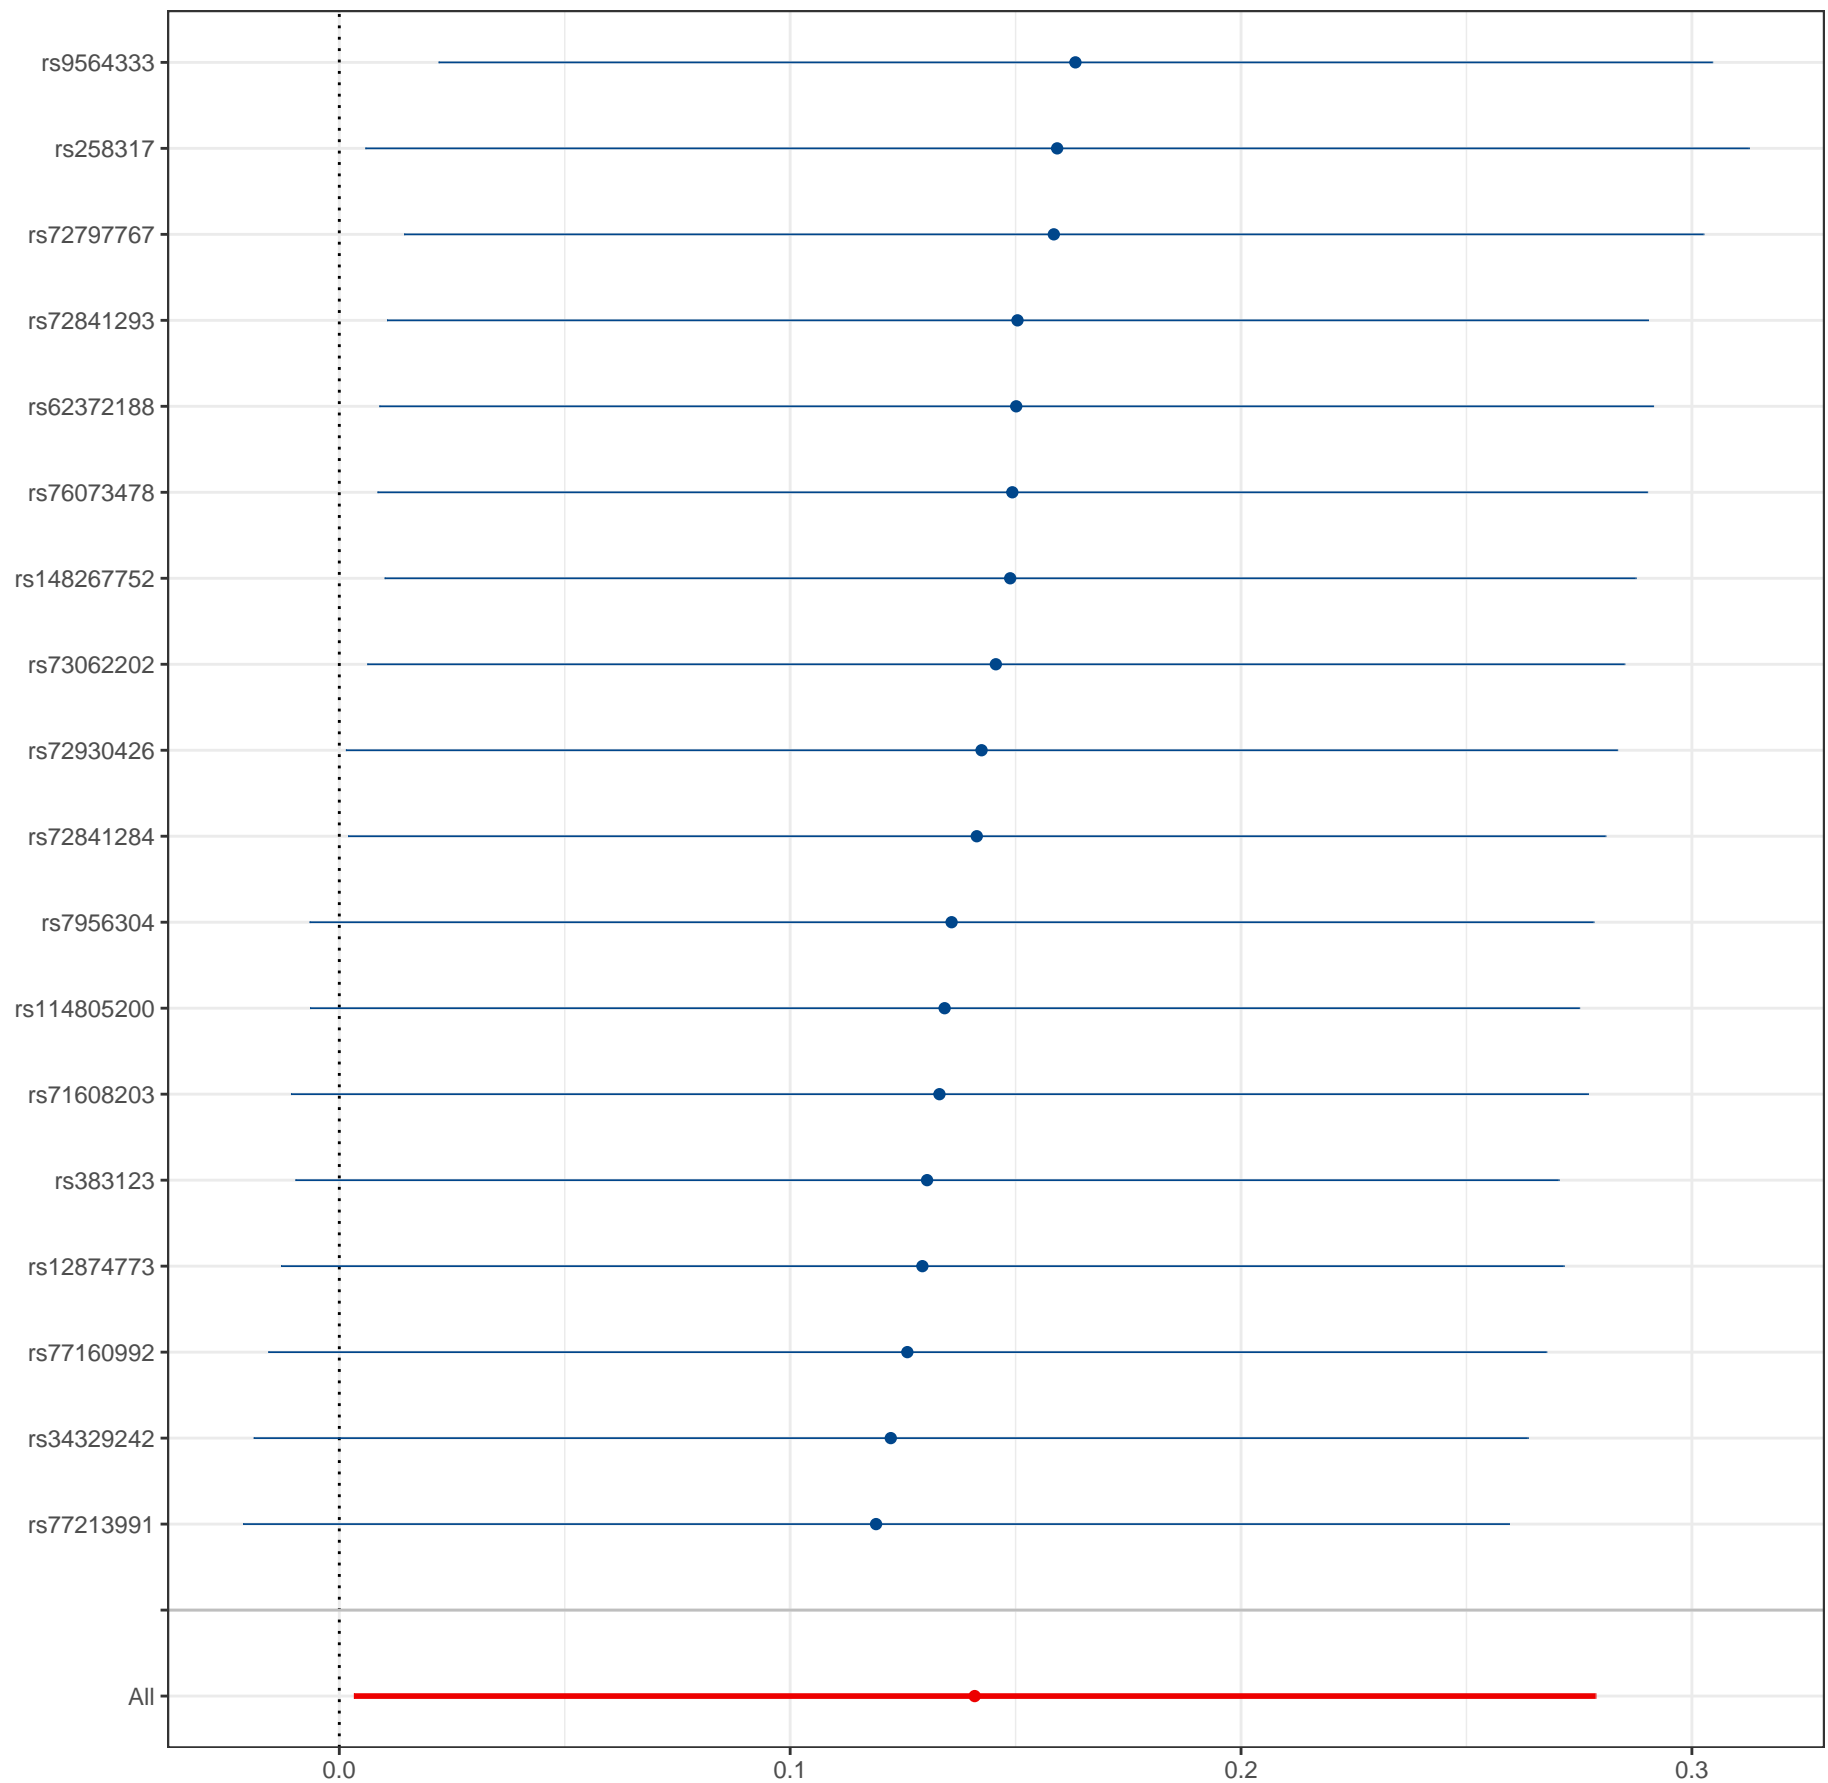

MR leave-one-out sensitivity analysis for 'Picolinoylglycine levels' on 'Parkinson's disease || id:ieu-b-7'

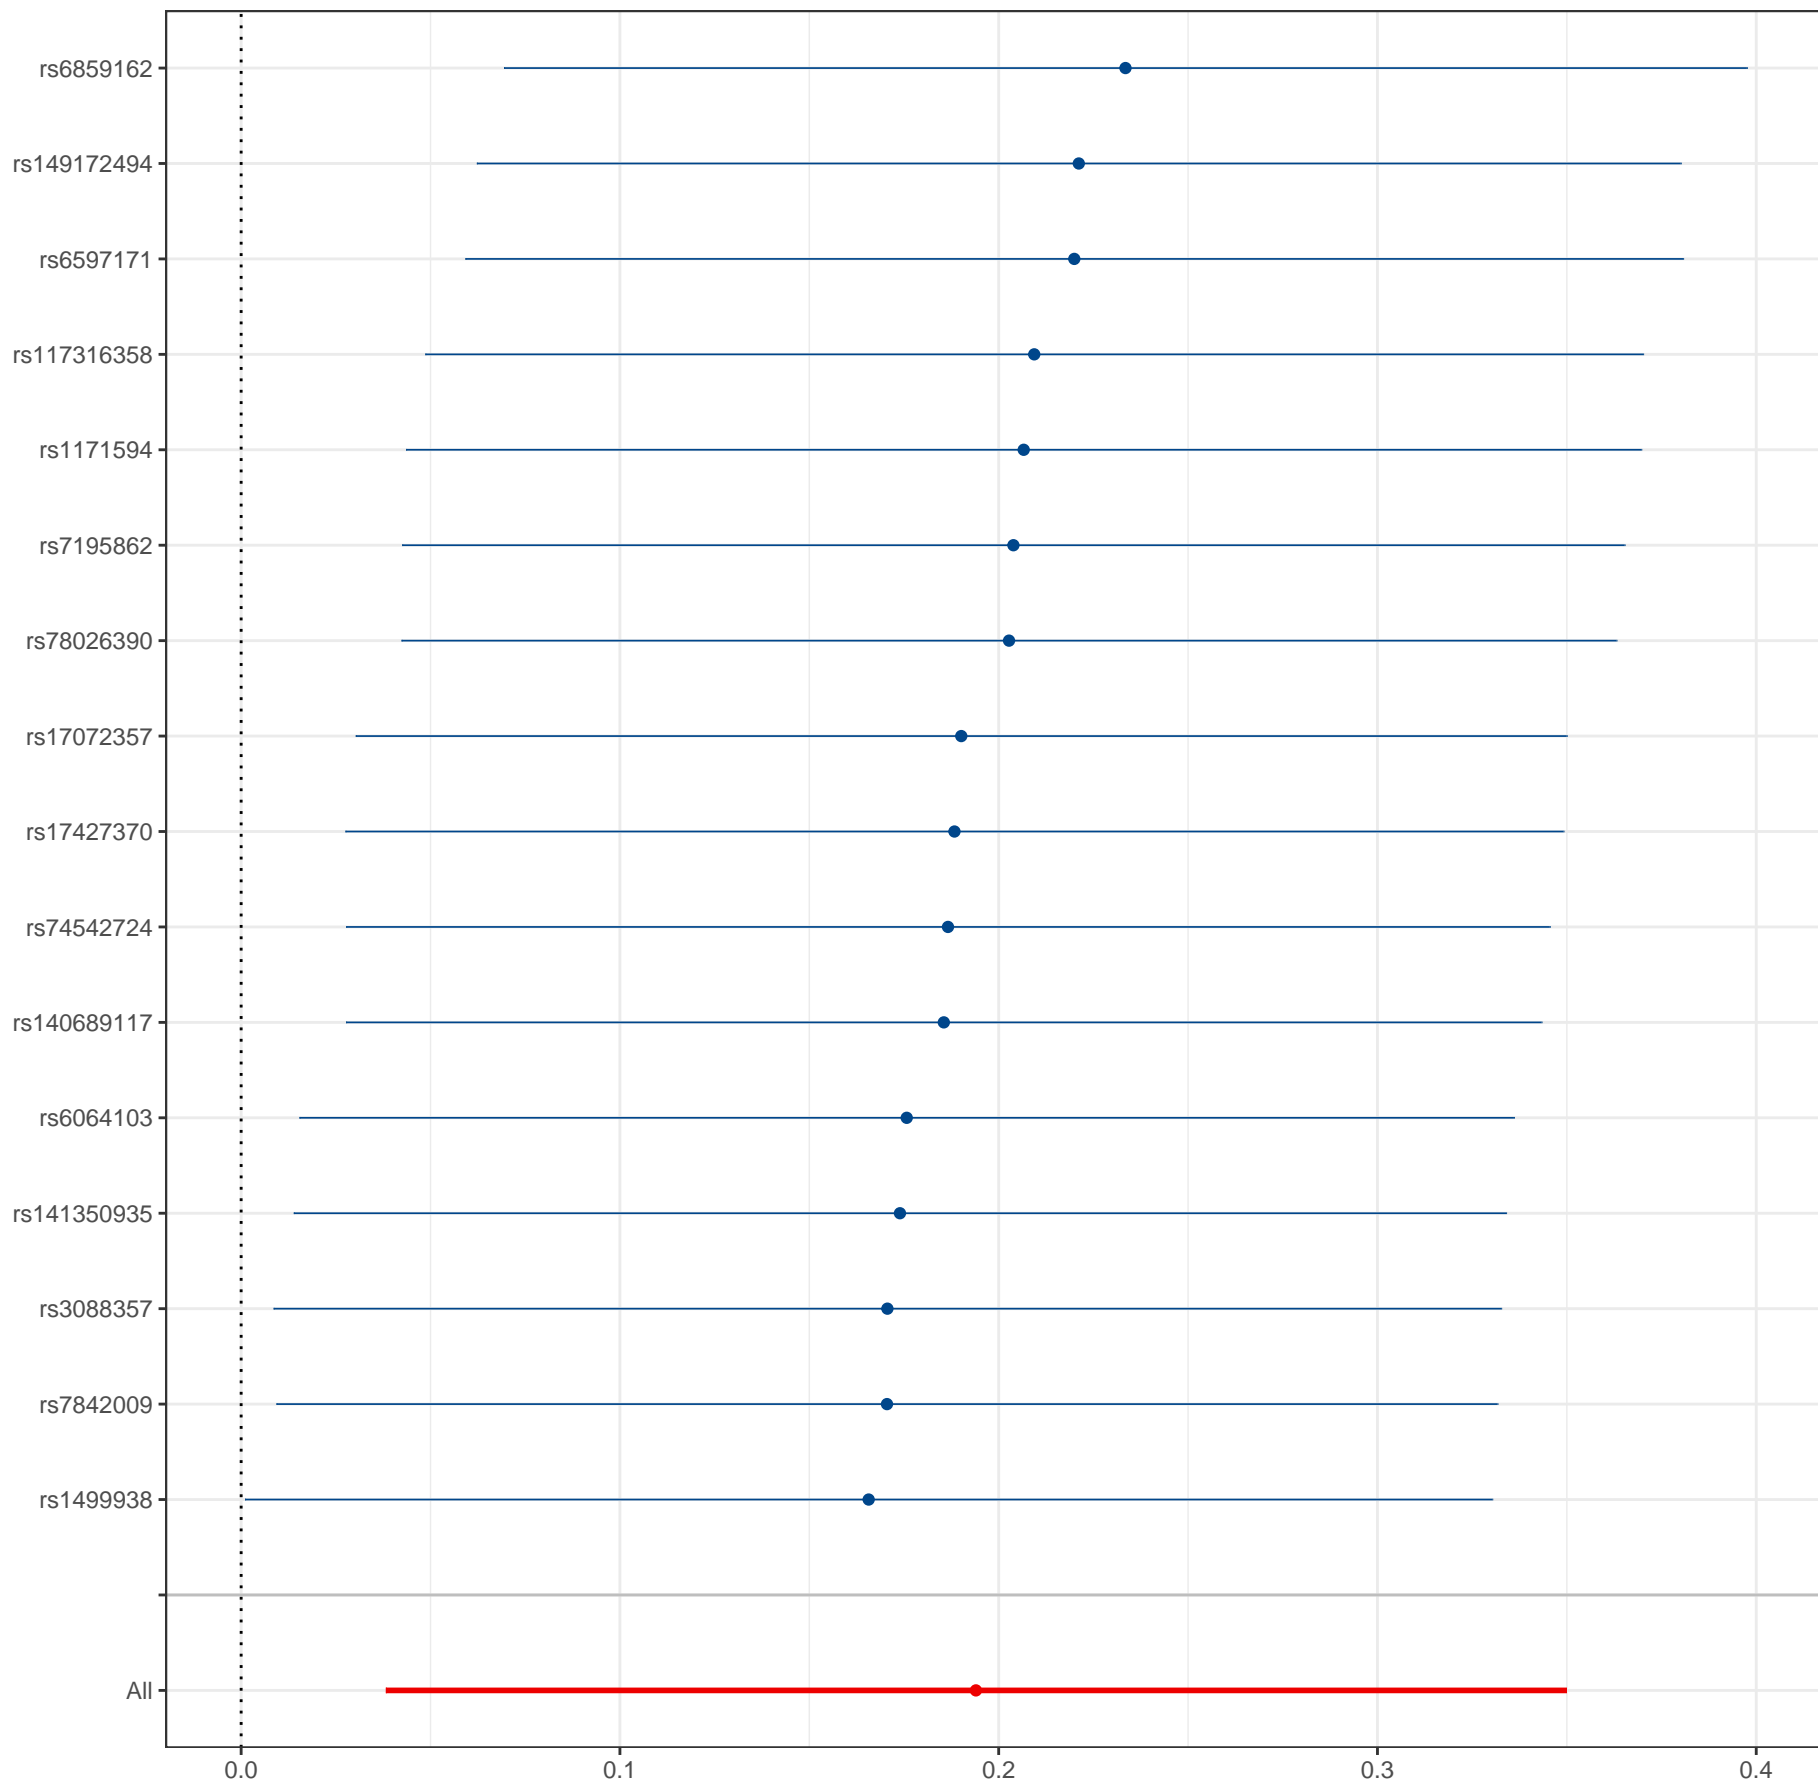

MR leave-one-out sensitivity analysis for  
'Cis 3,4-methyleneheptanoate levels' on 'Parkinson's disease || id:i eu-b-7'

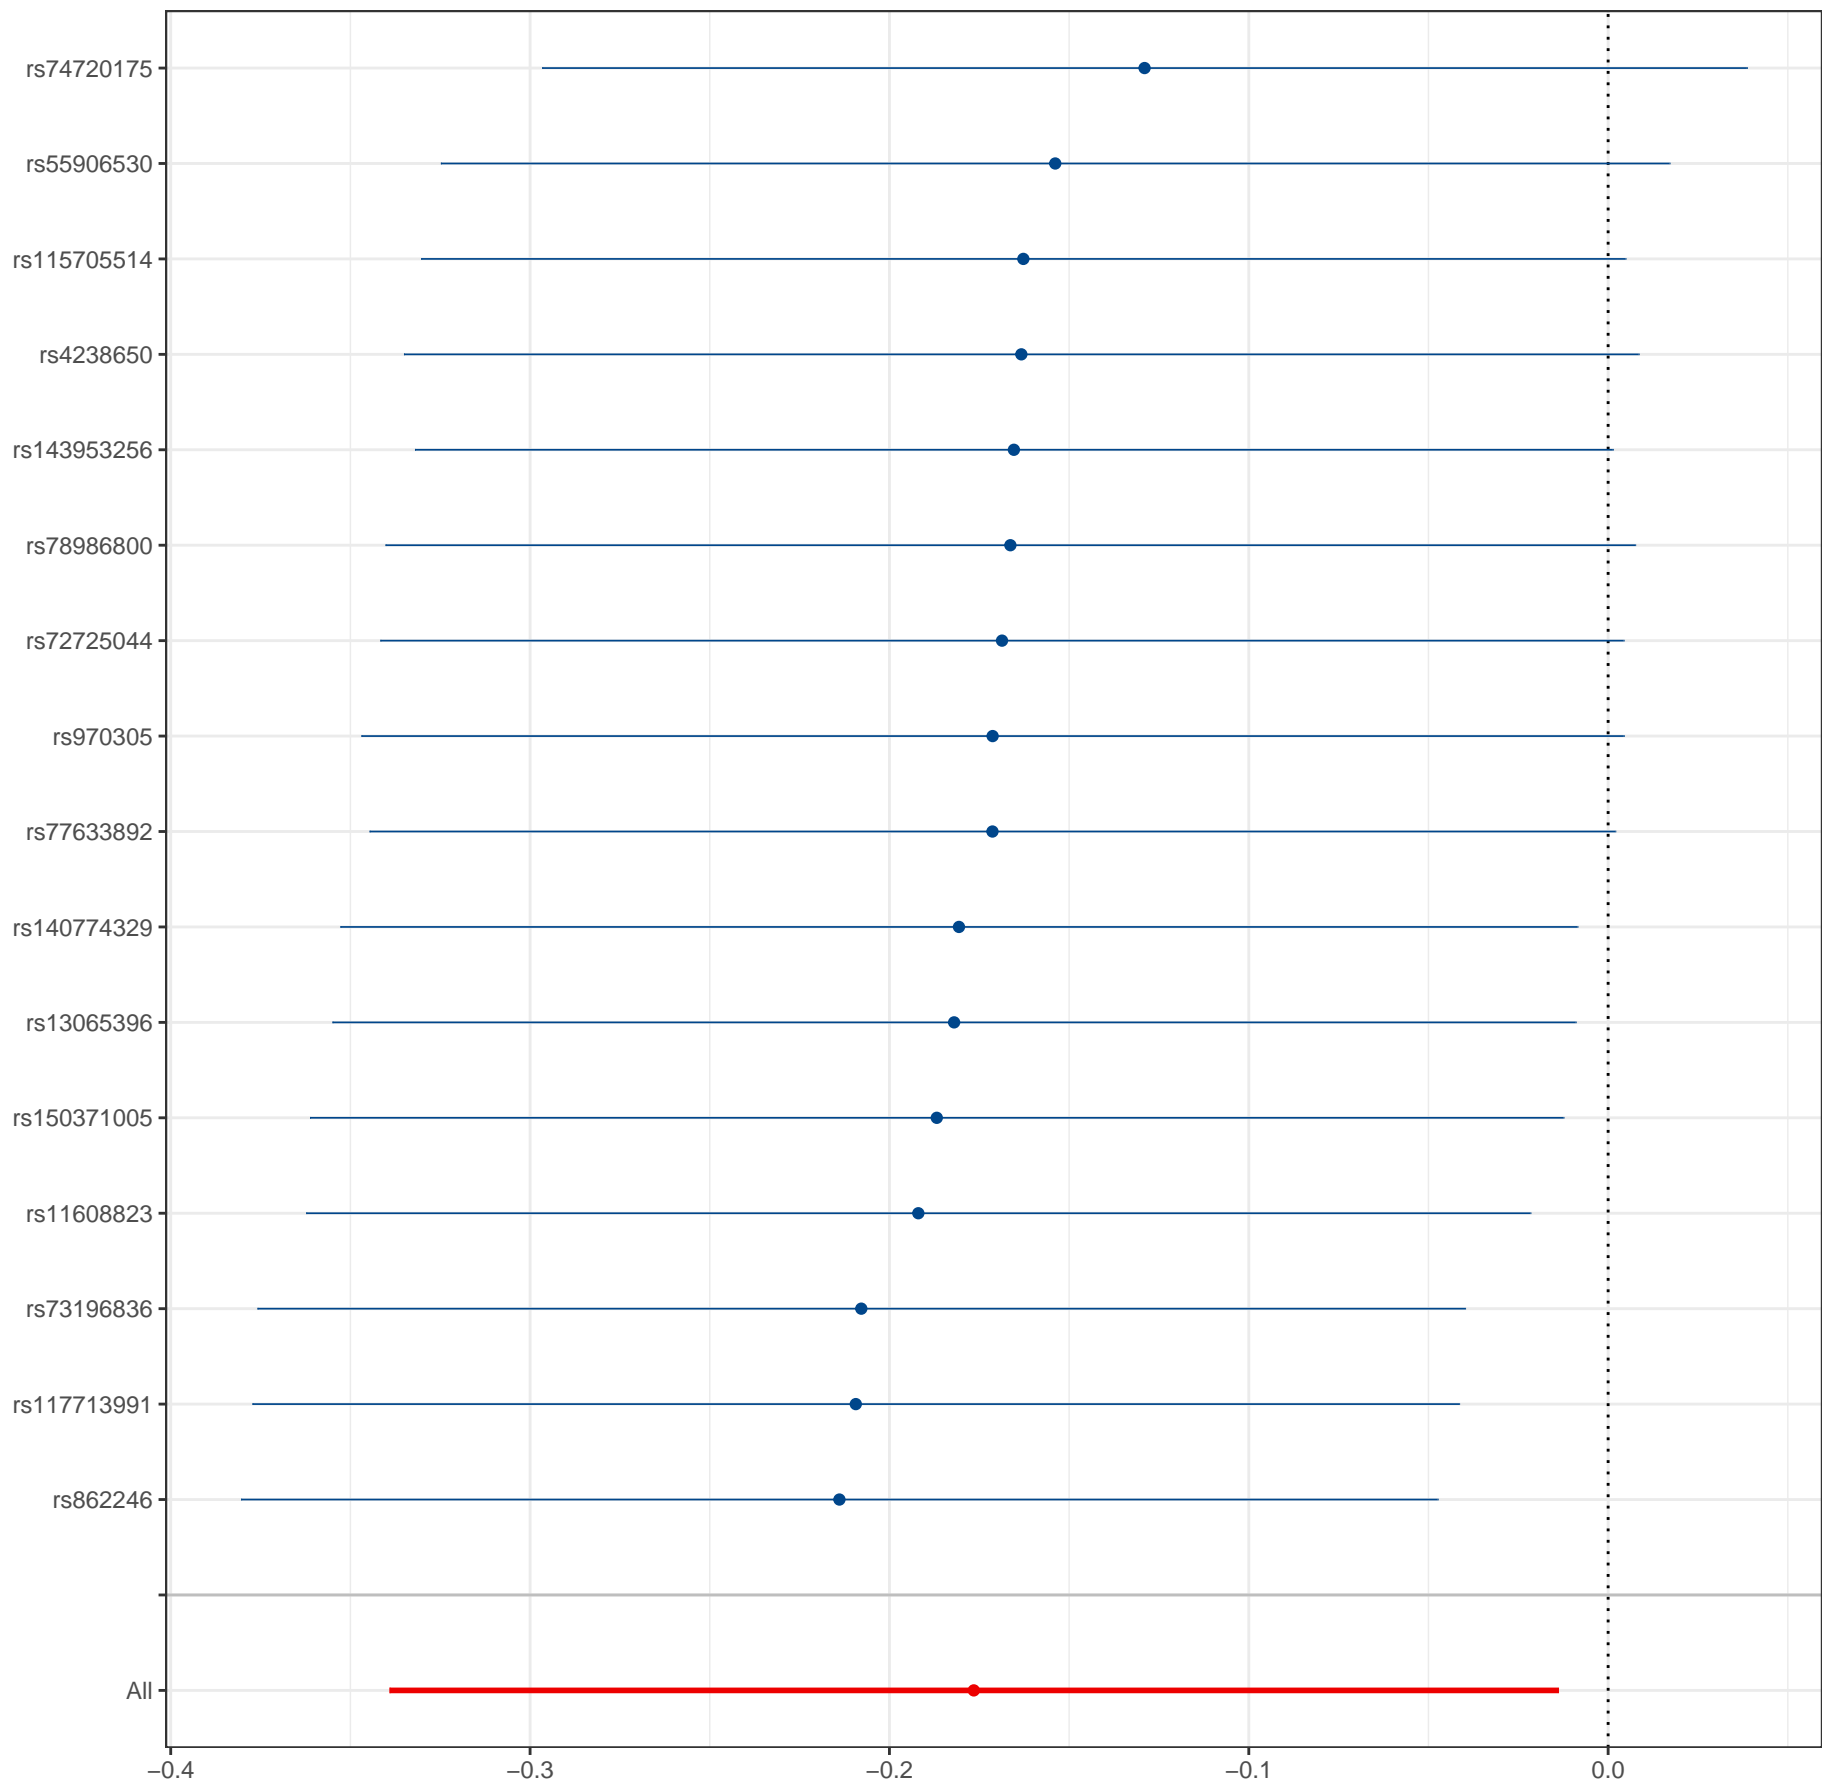

MR leave-one-out sensitivity analysis for '2,4-di-tert-butylphenol levels' on 'Parkinson's disease || id:ieu-b-7'

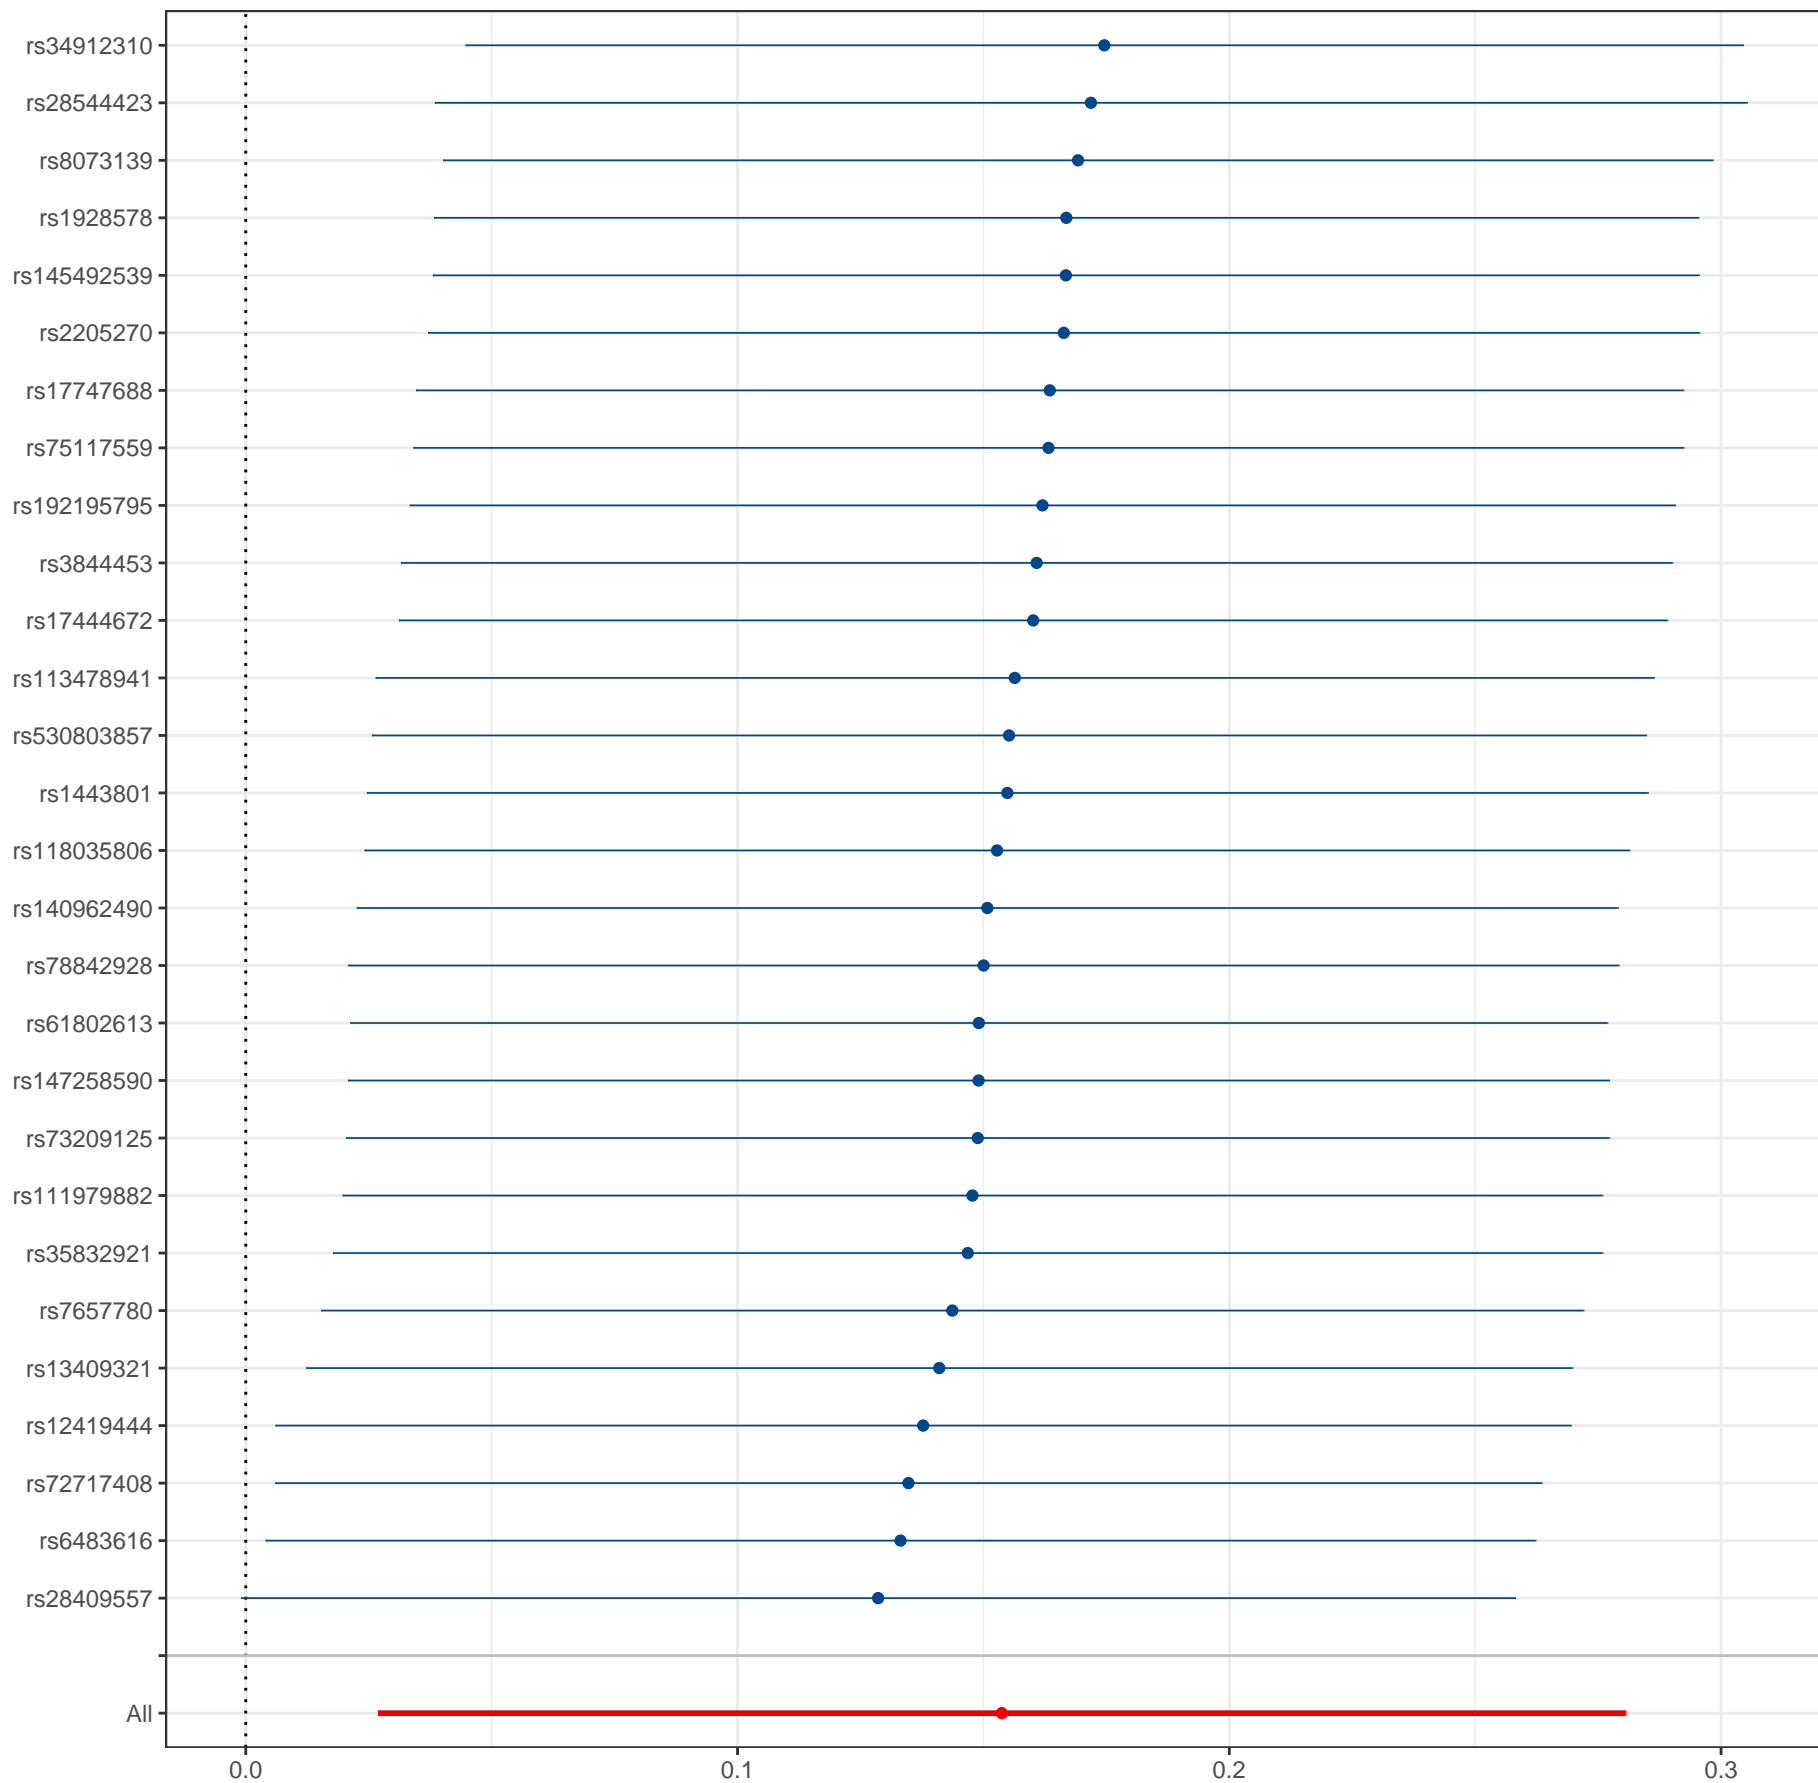

MR leave-one-out sensitivity analysis for 'Vanillylmandelate (VMA) levels' on 'Parkinson's disease || id:ieu-b-7'

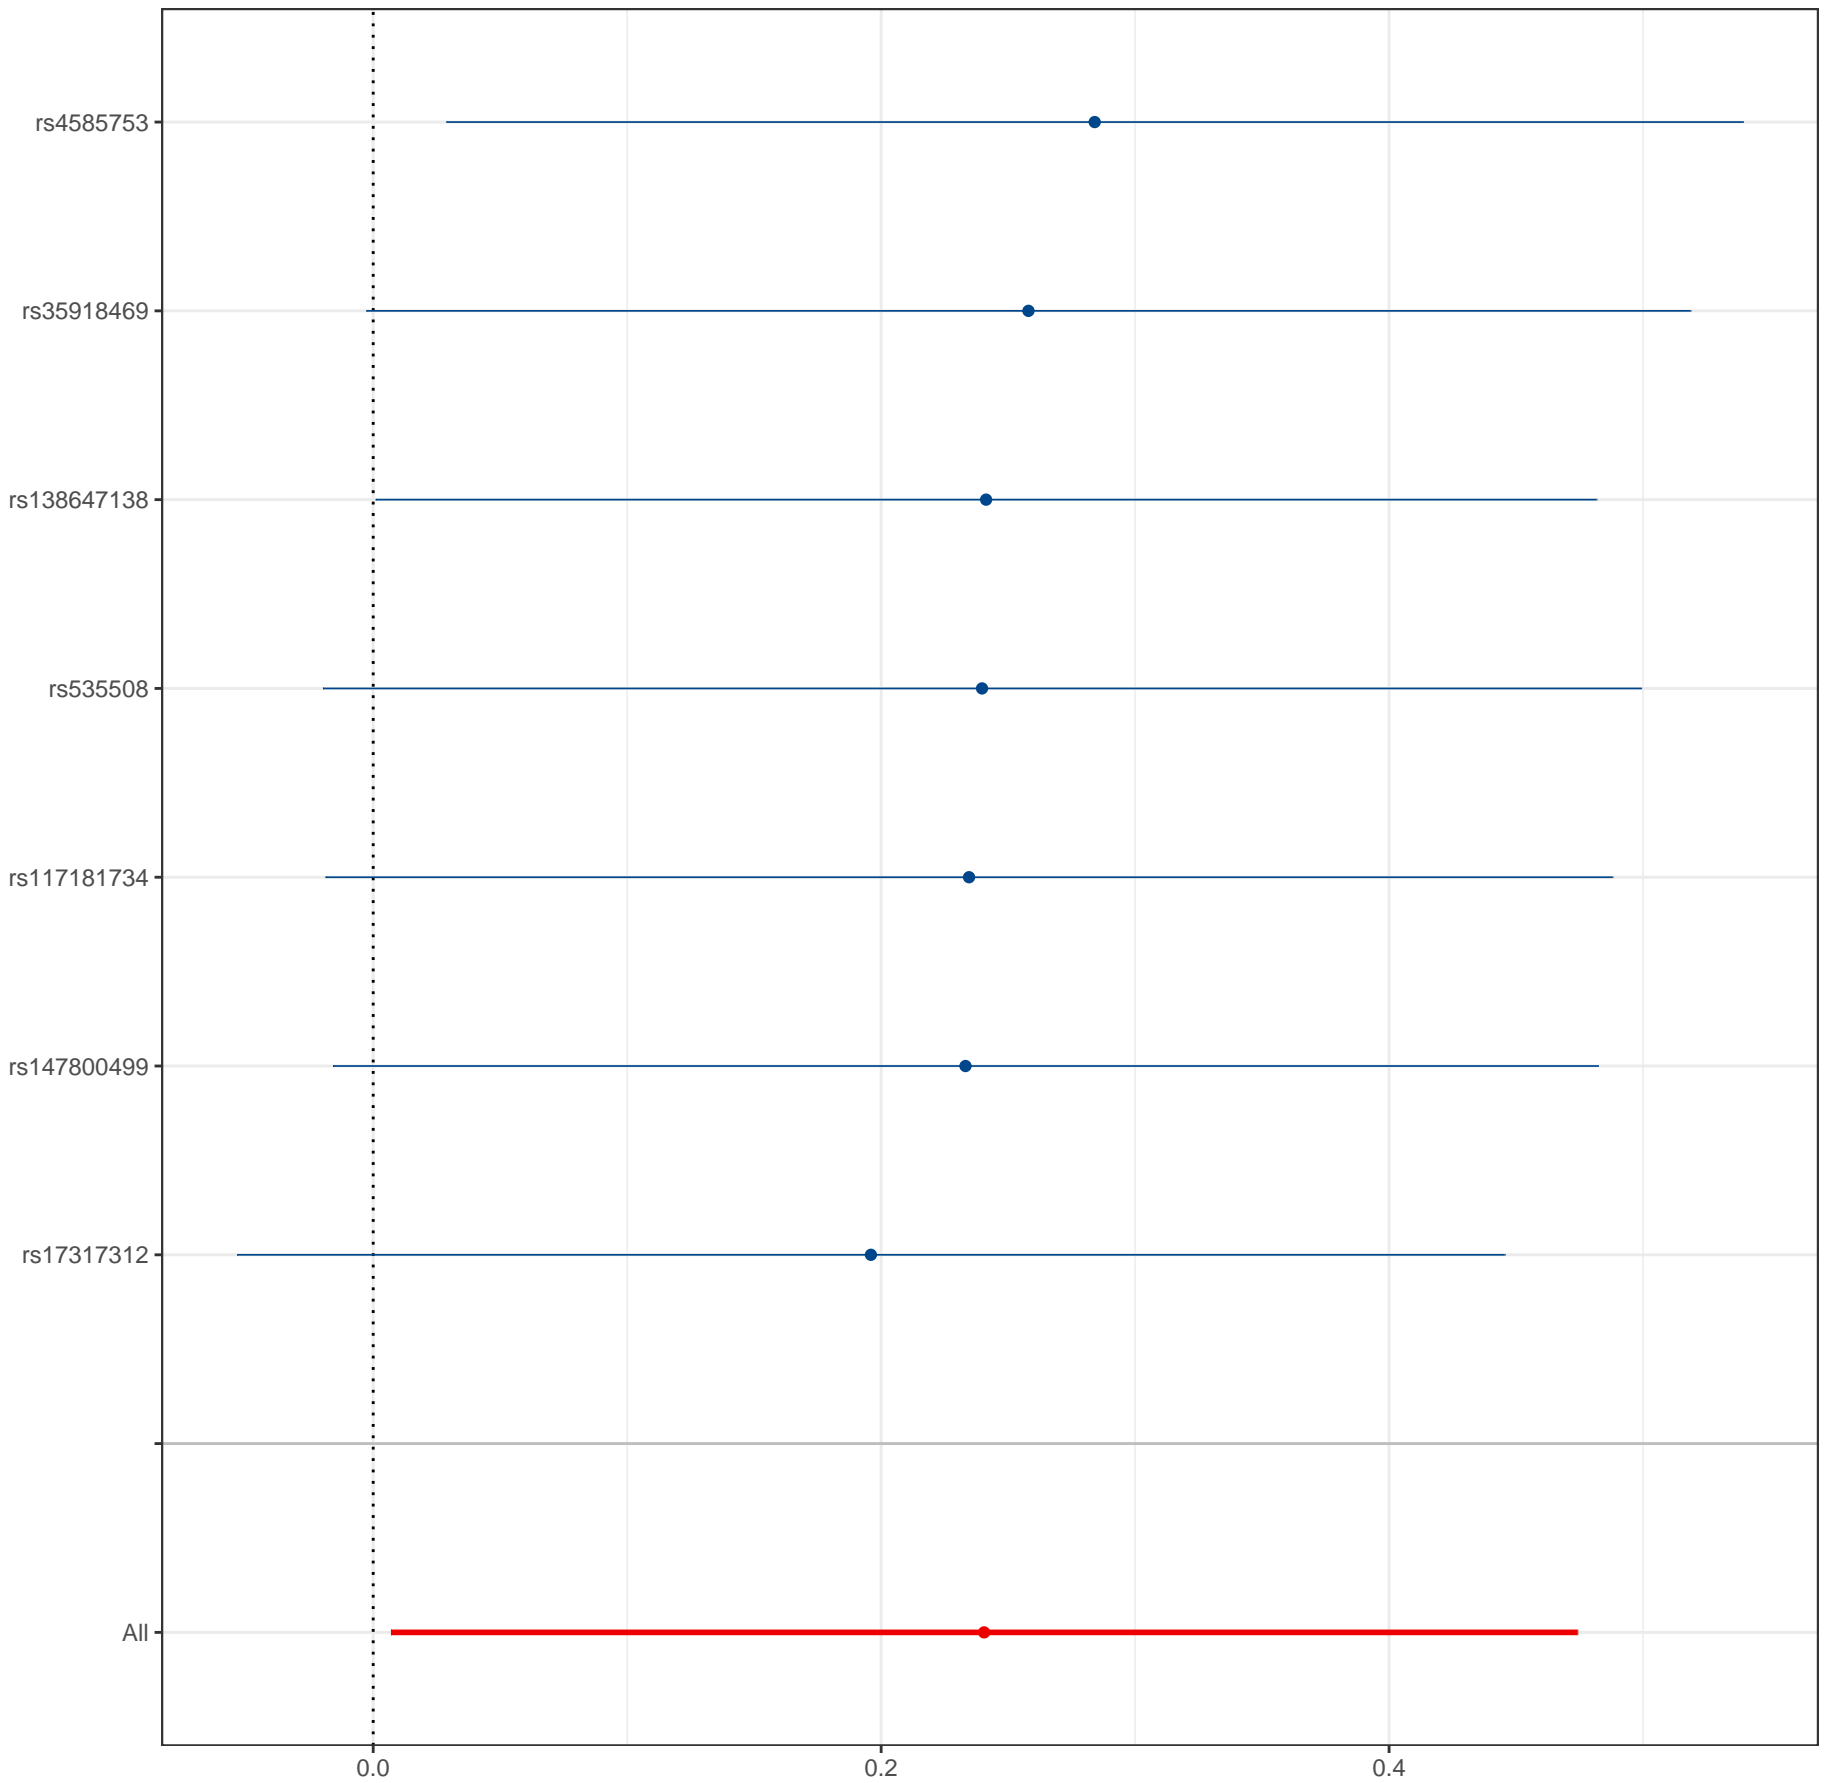

MR leave-one-out sensitivity analysis for 'Cholate levels' on 'Parkinson's disease || id:ieu-b-7'



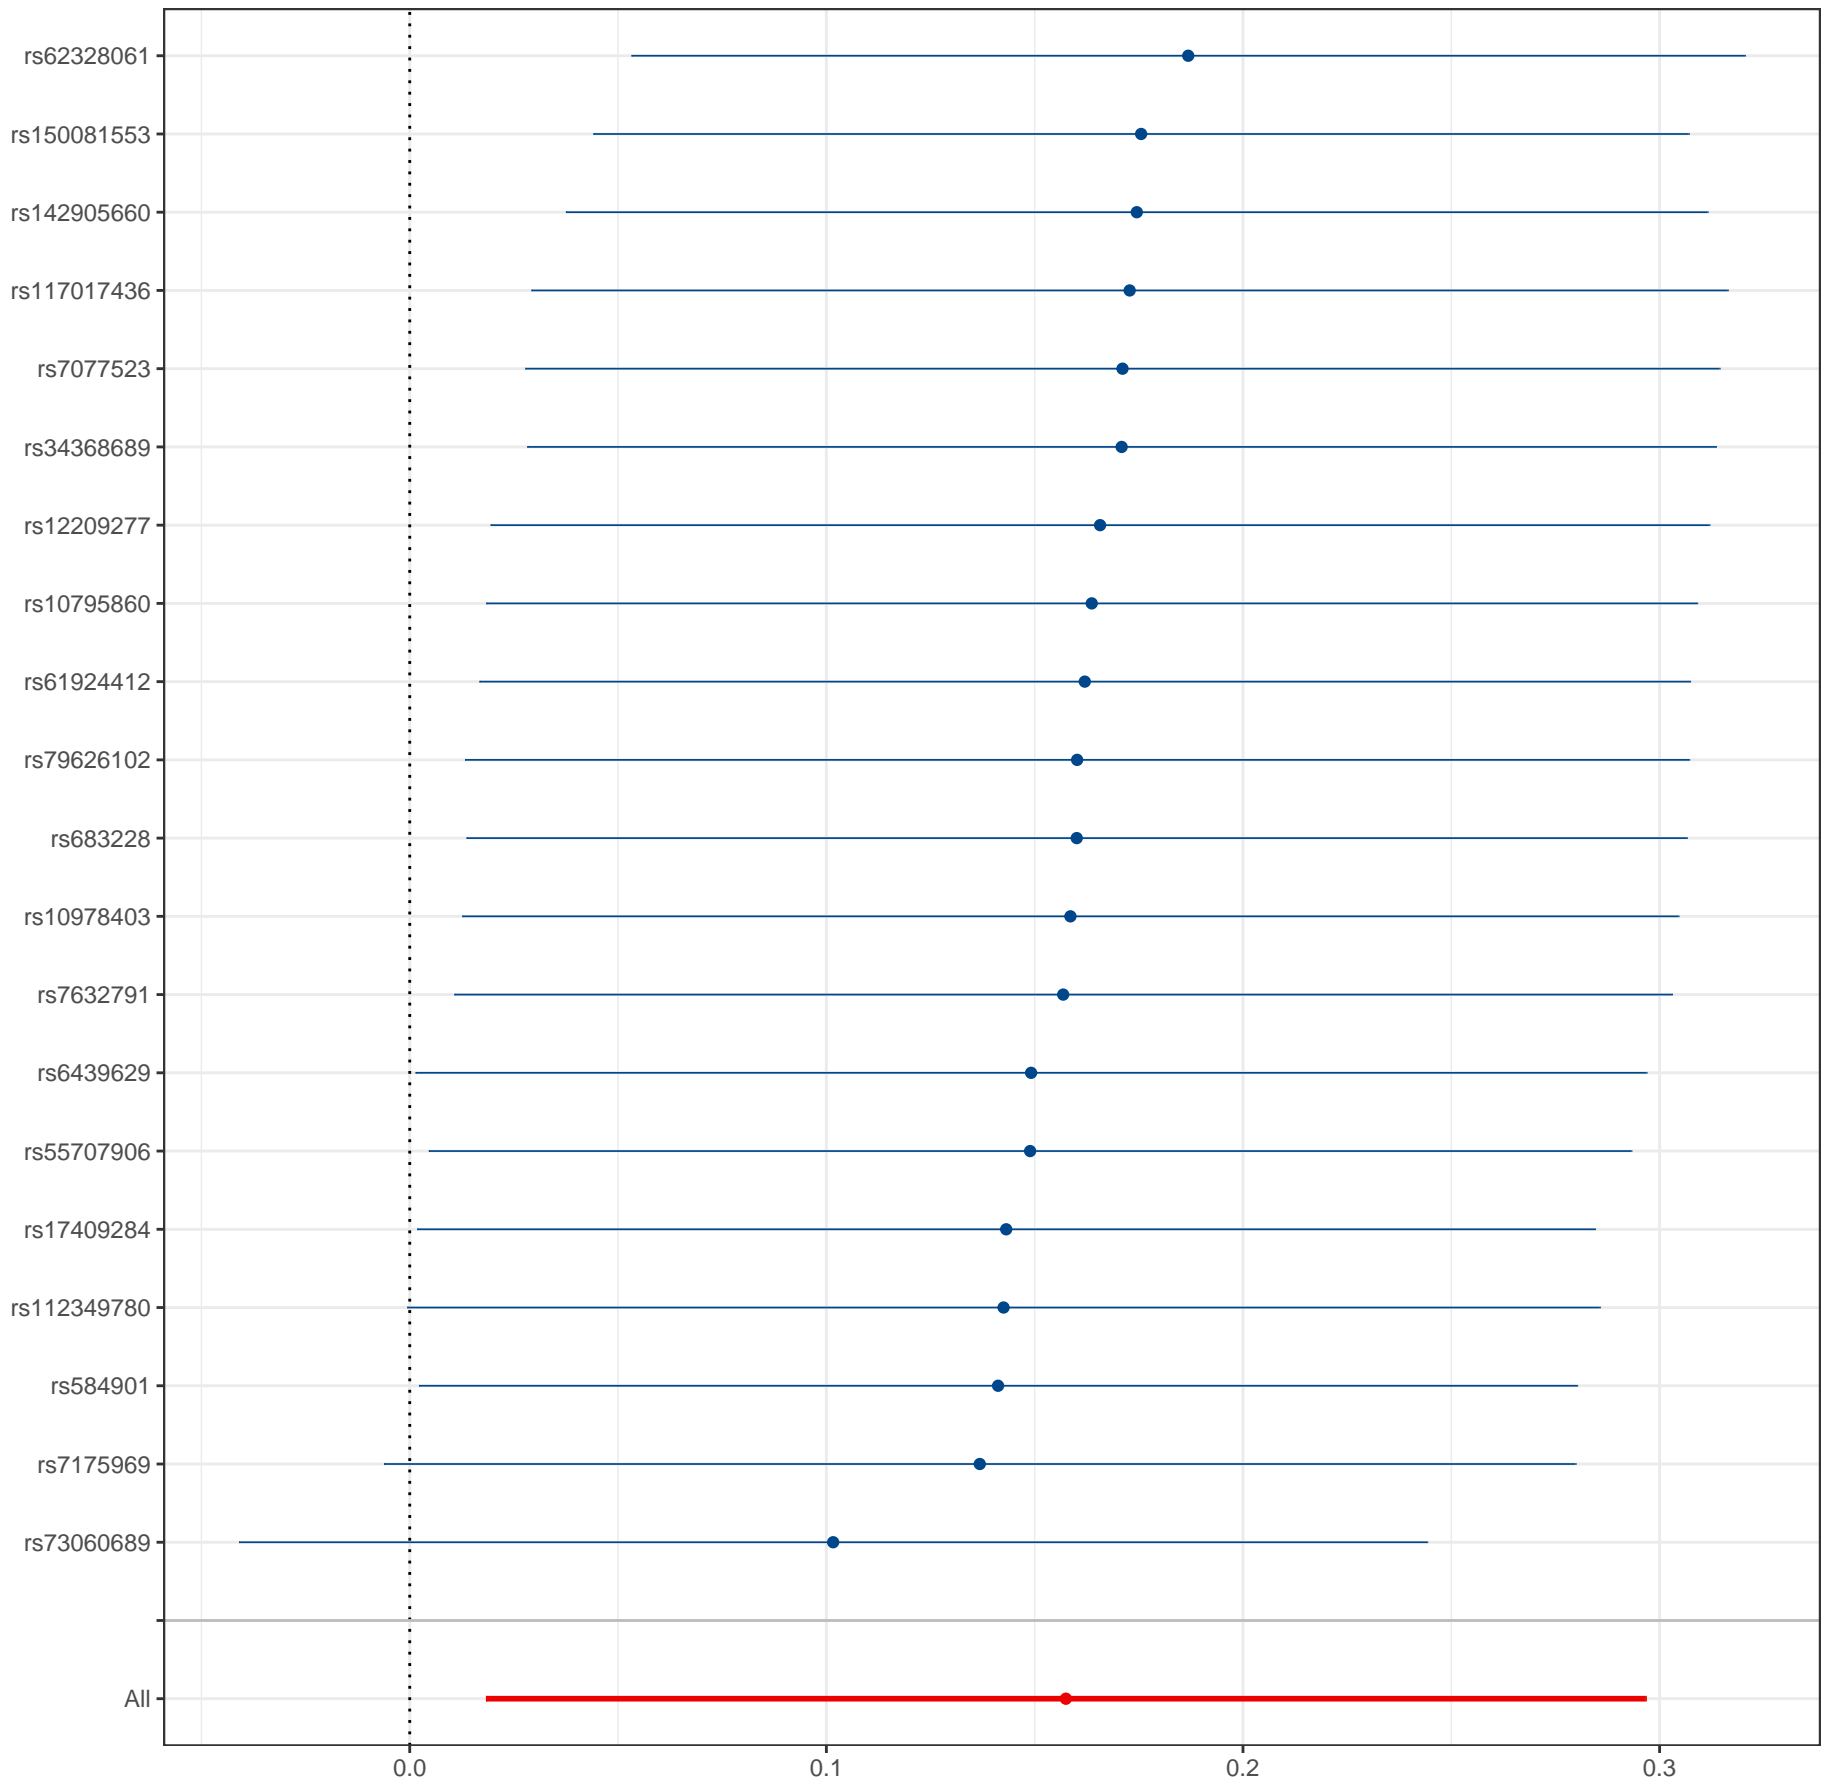

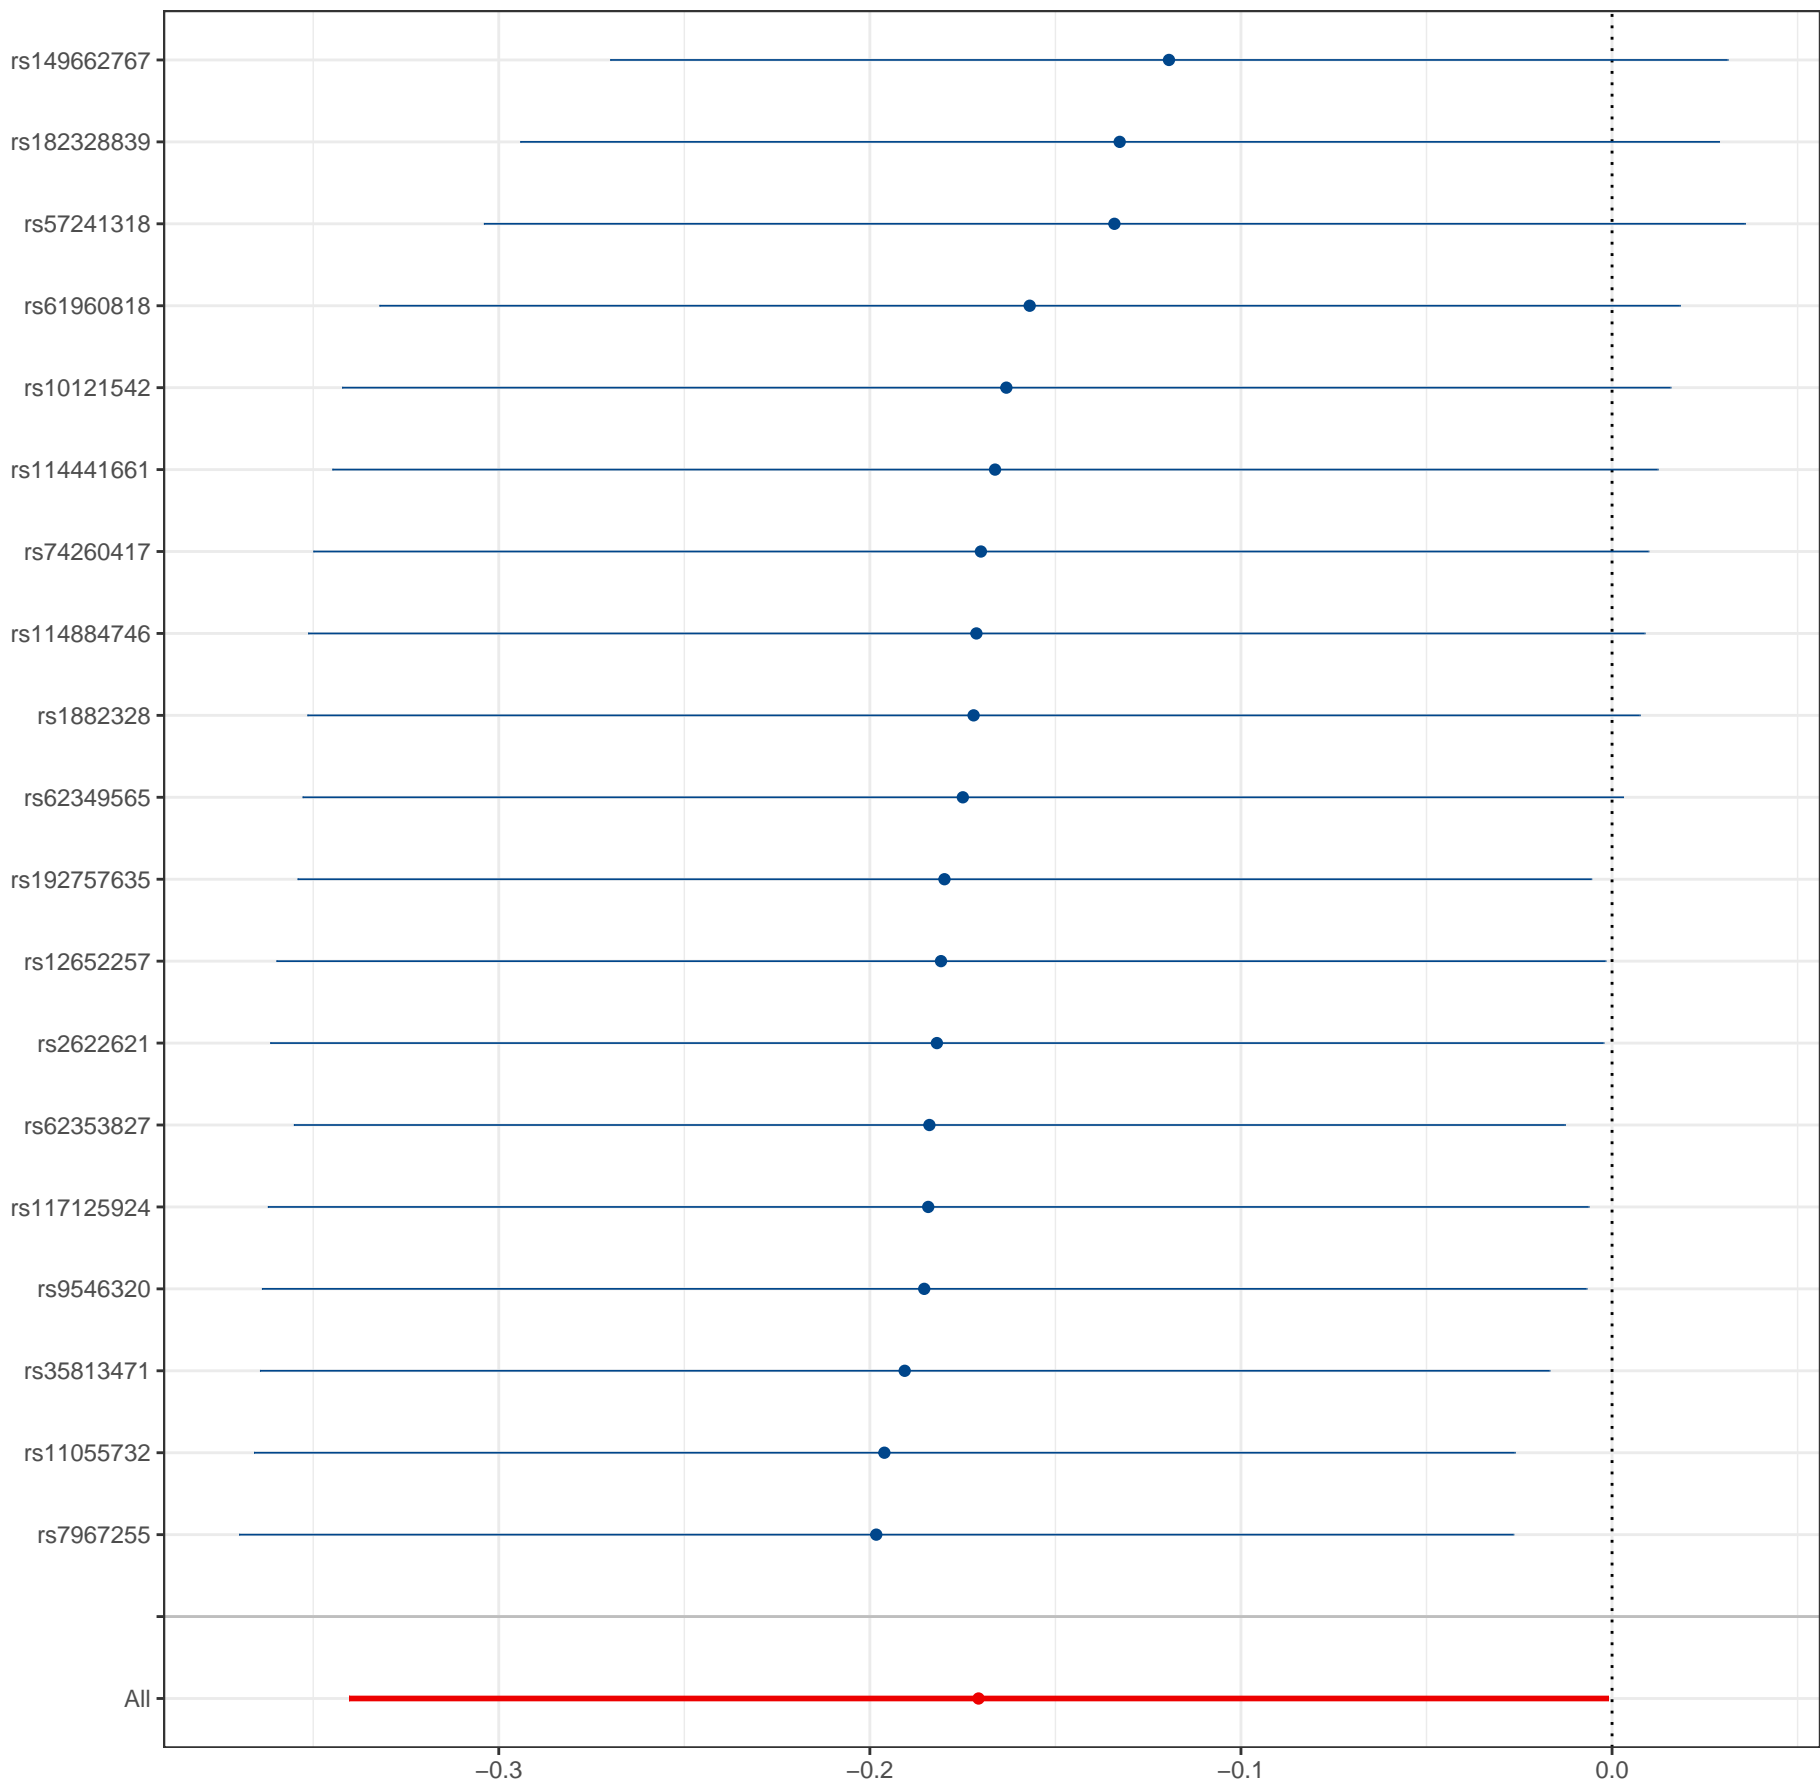

MR leave-one-out sensitivity analysis for 'Alanine levels' on 'Parkinson's disease || id:ieu-b-7'

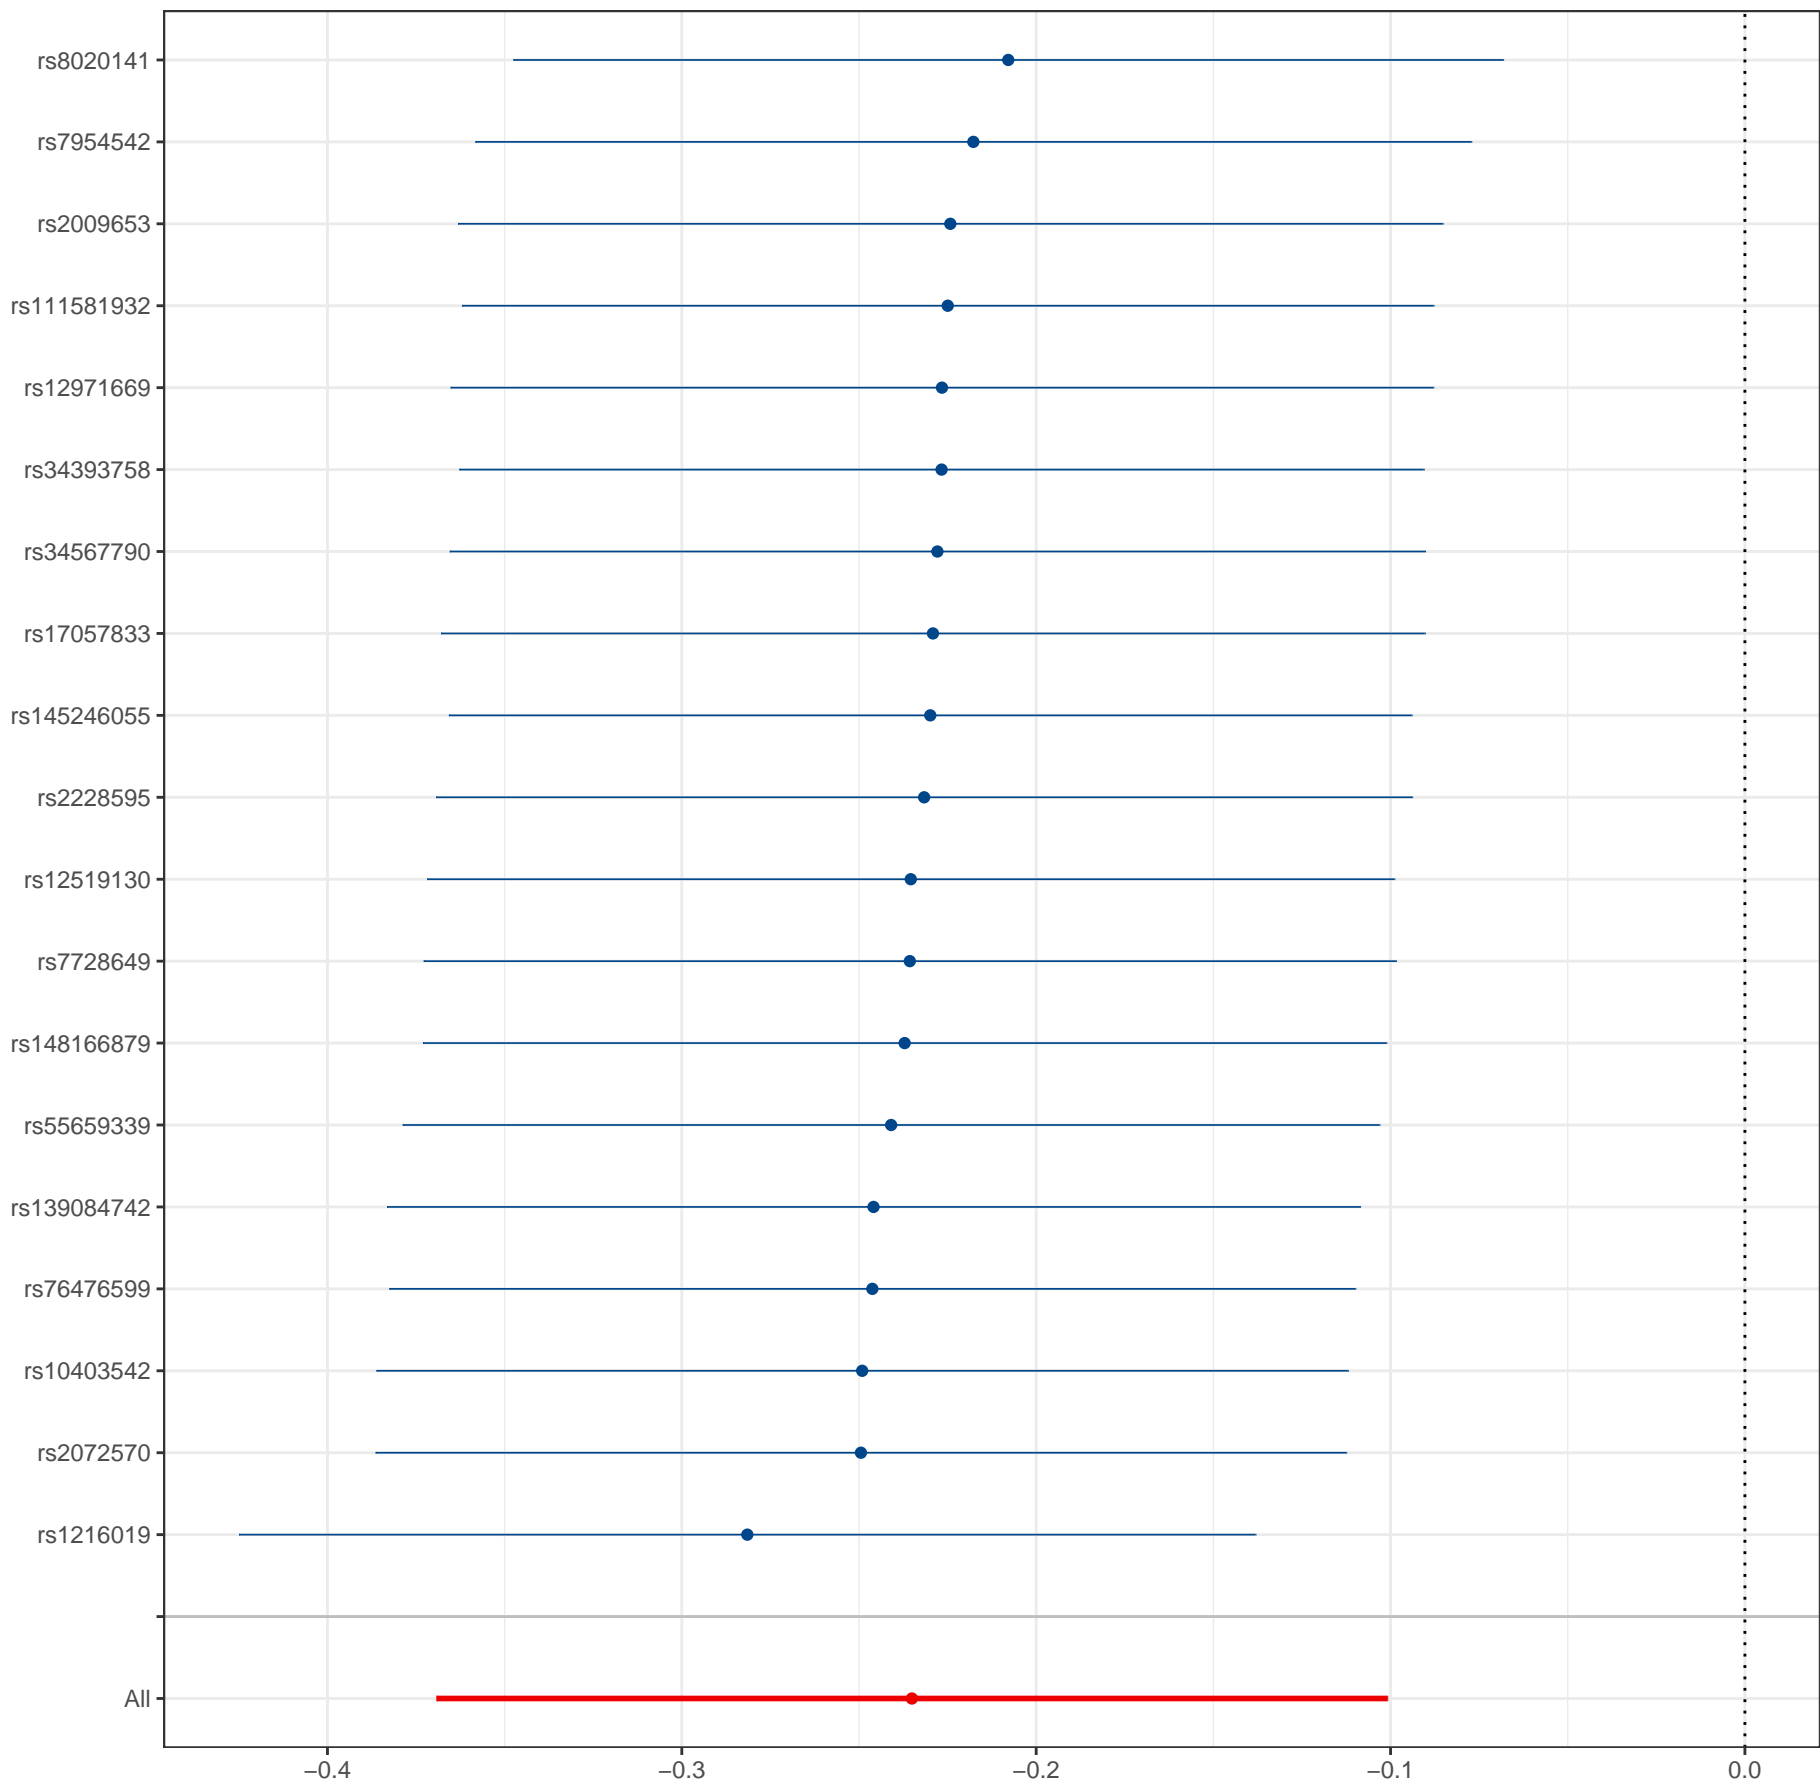

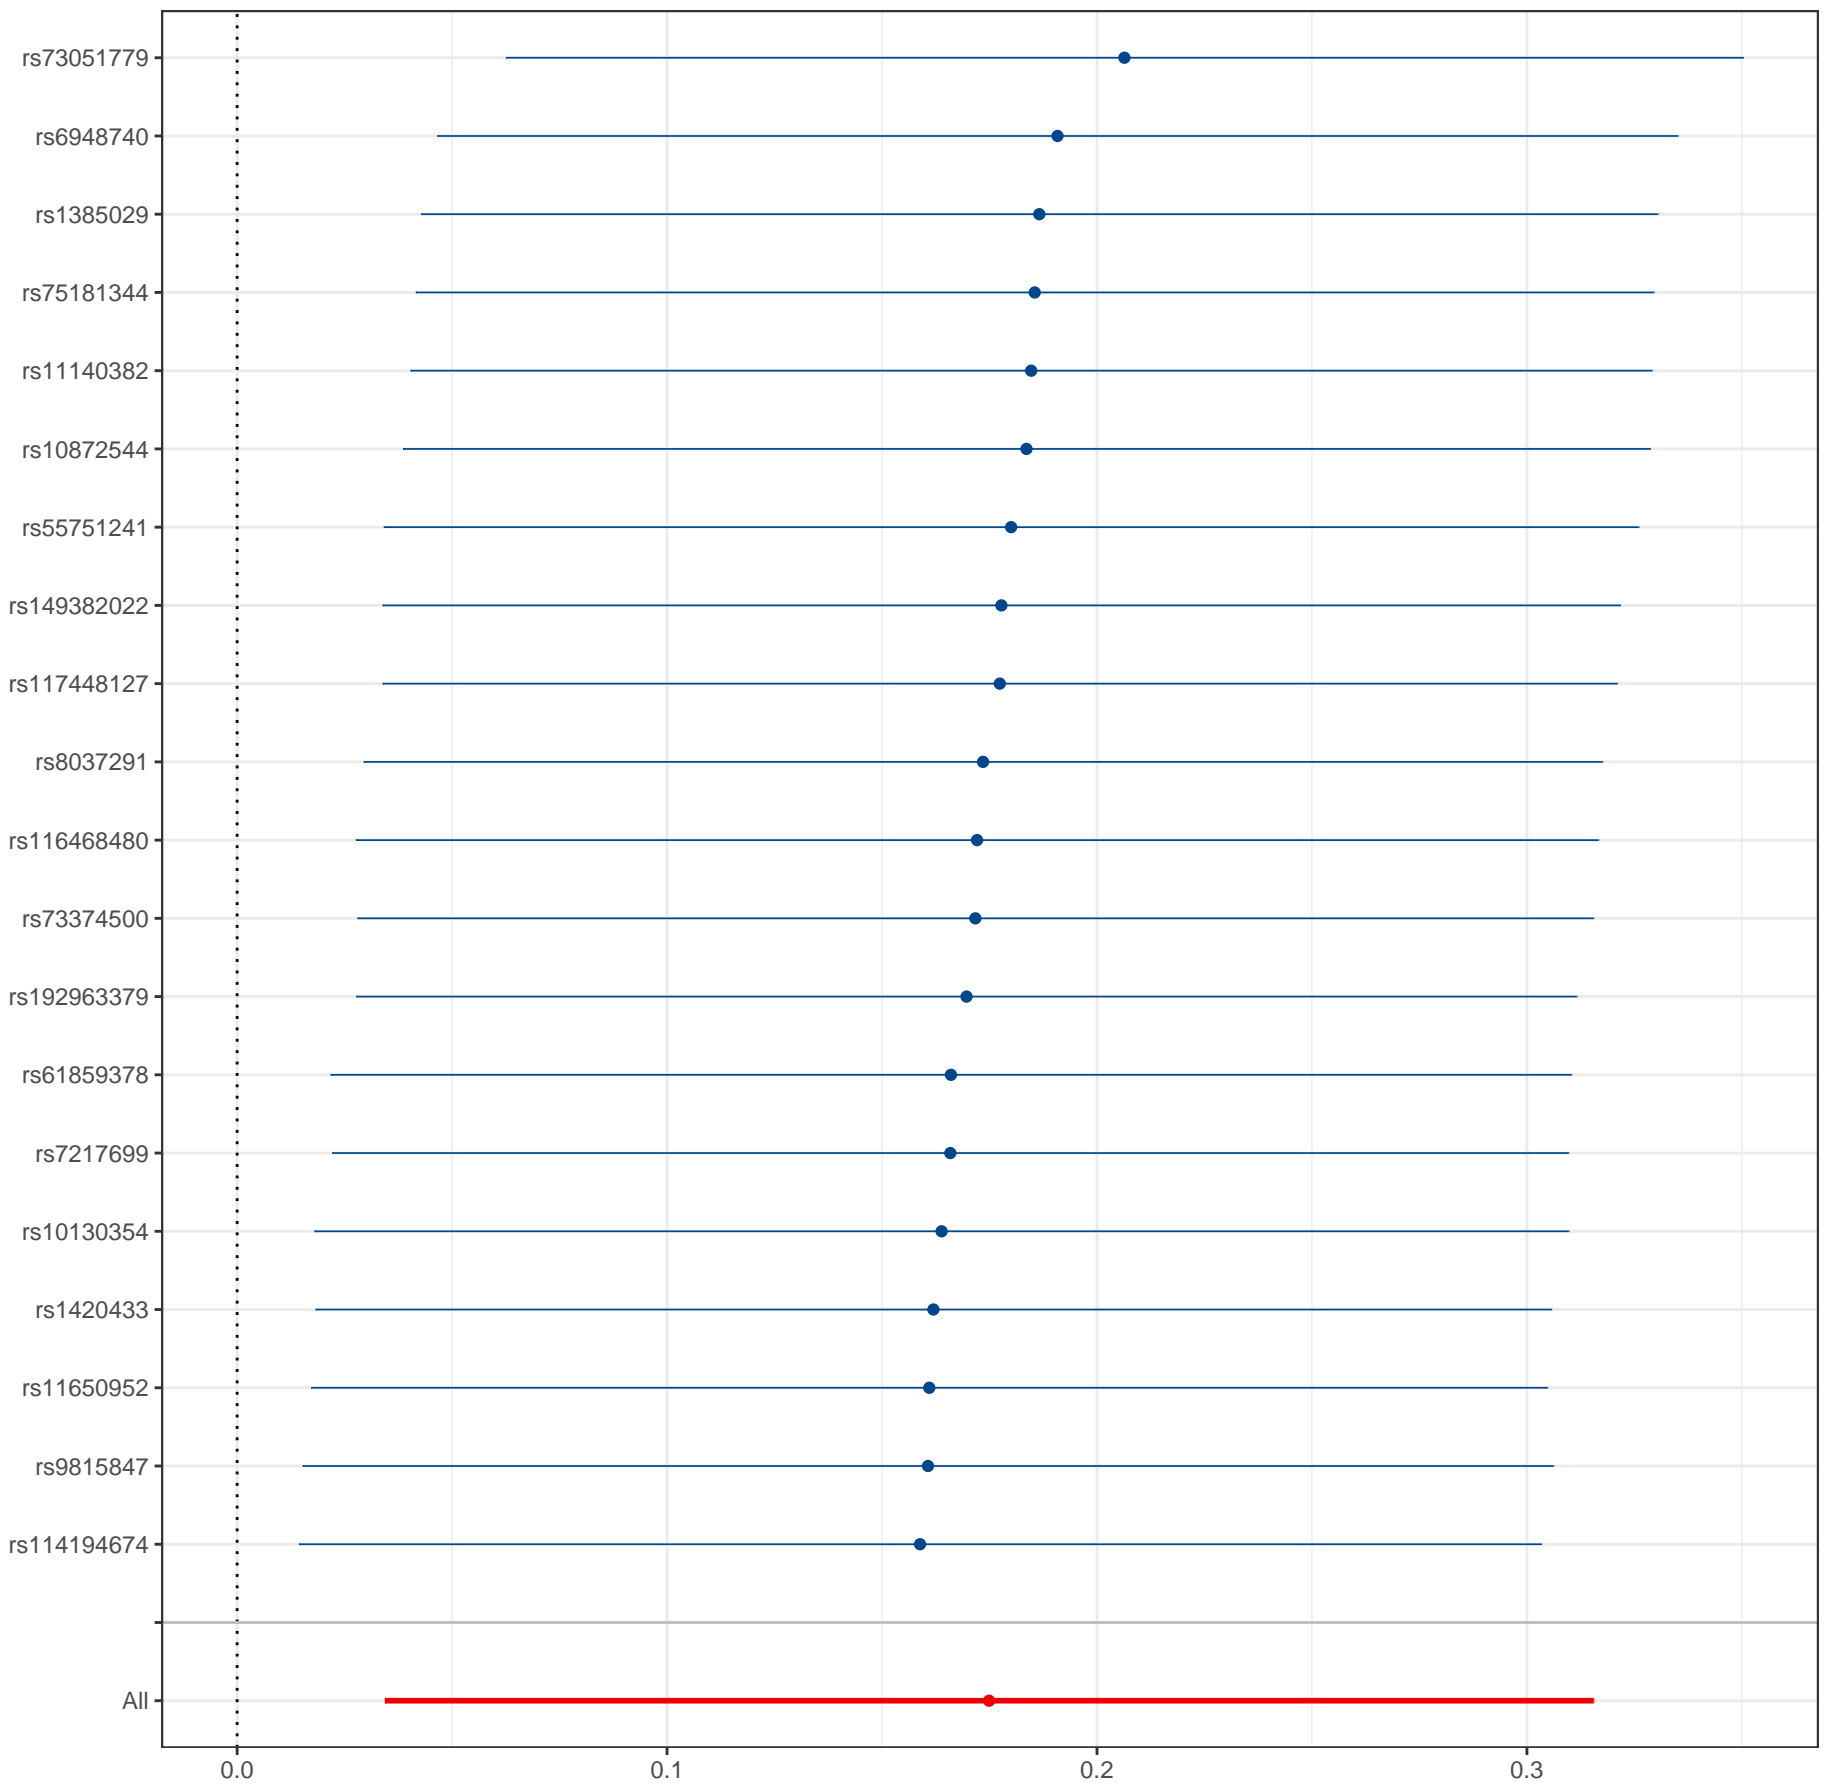

MR leave-one-out sensitivity analysis for 'X-11372 levels' on 'Parkinson's disease || id:ieu-b-7'

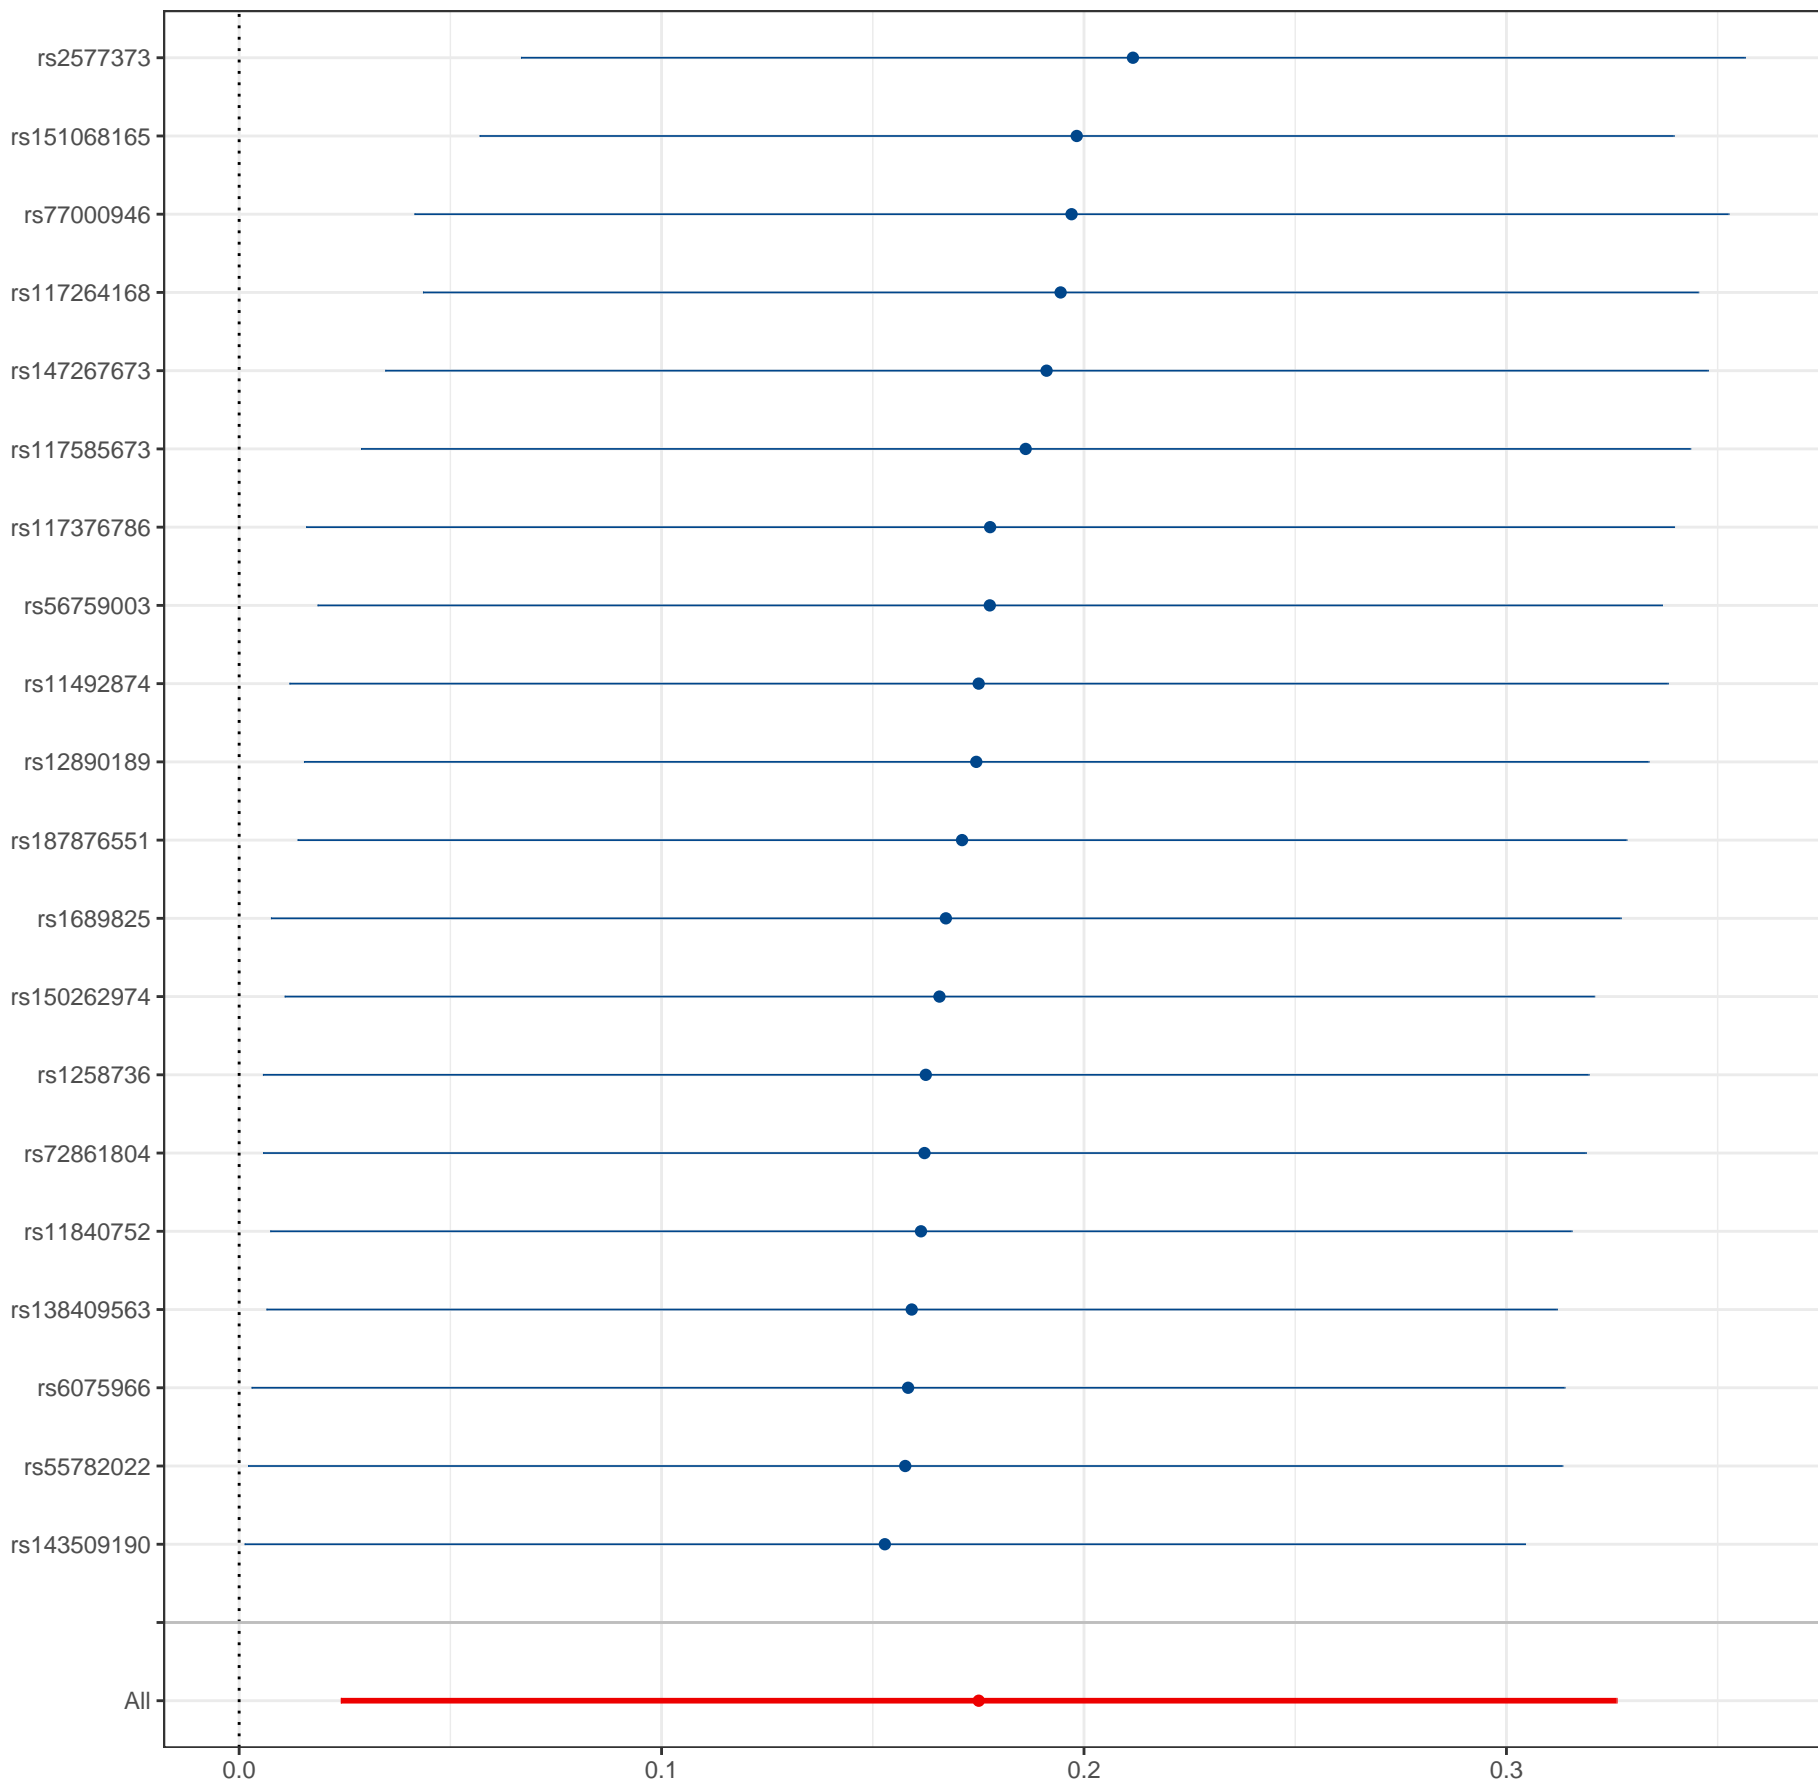

MR leave-one-out sensitivity analysis for 'X-21258 levels' on 'Parkinson's disease || id:ieu-b-7'

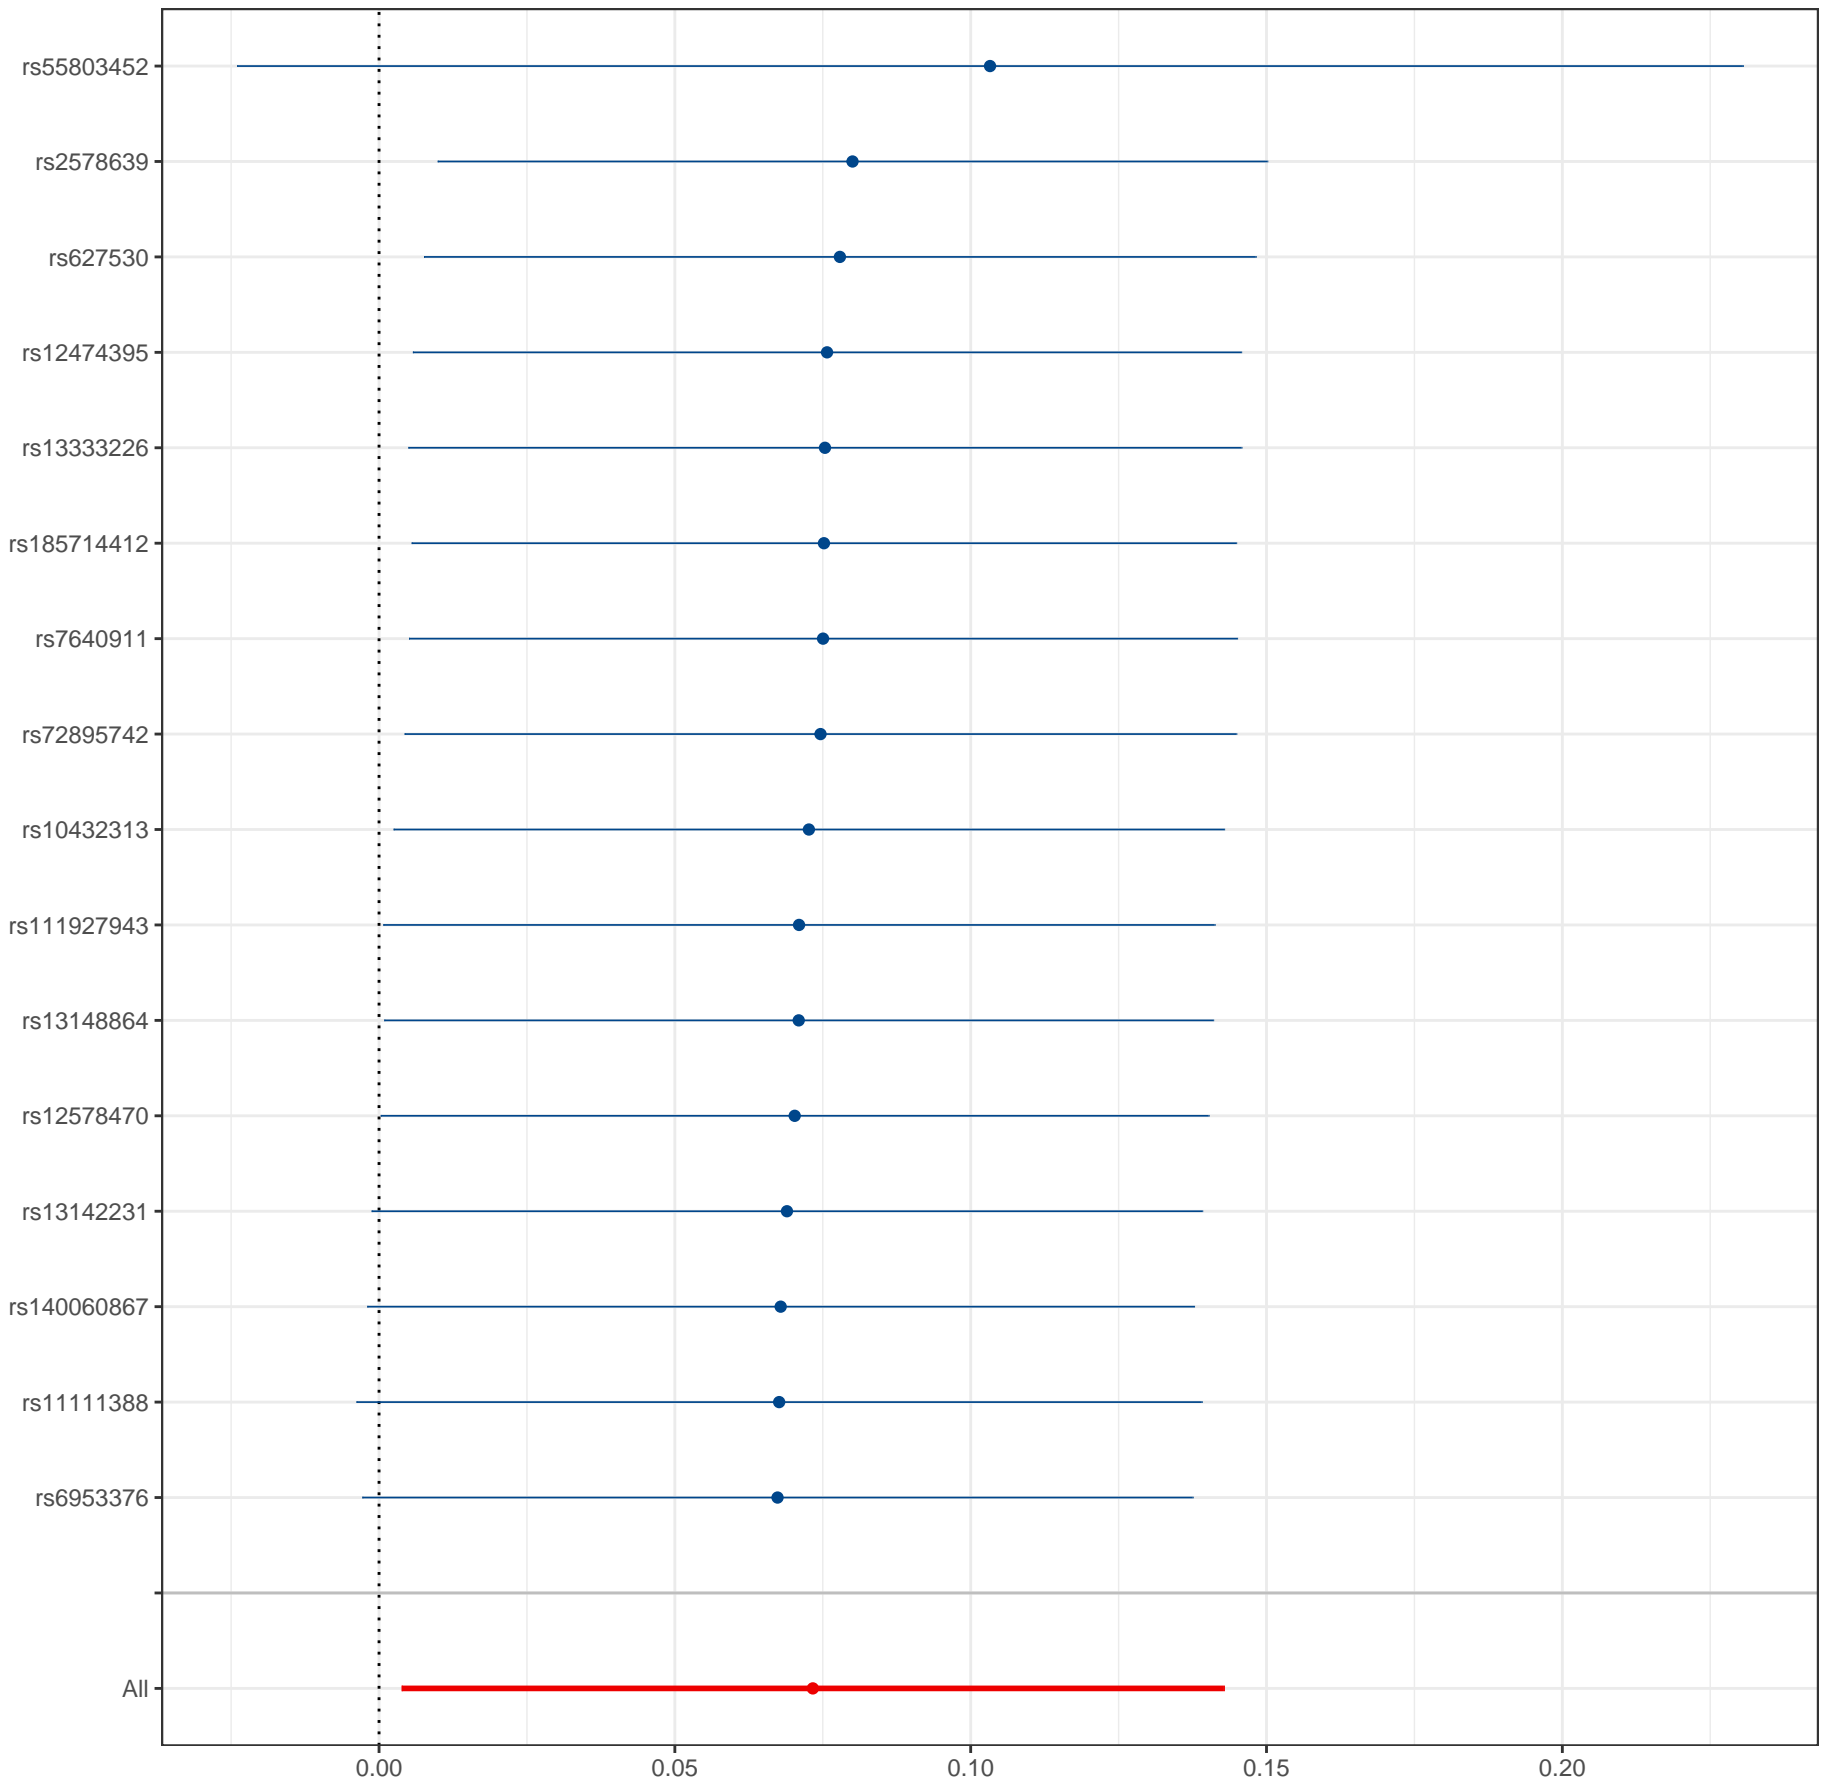

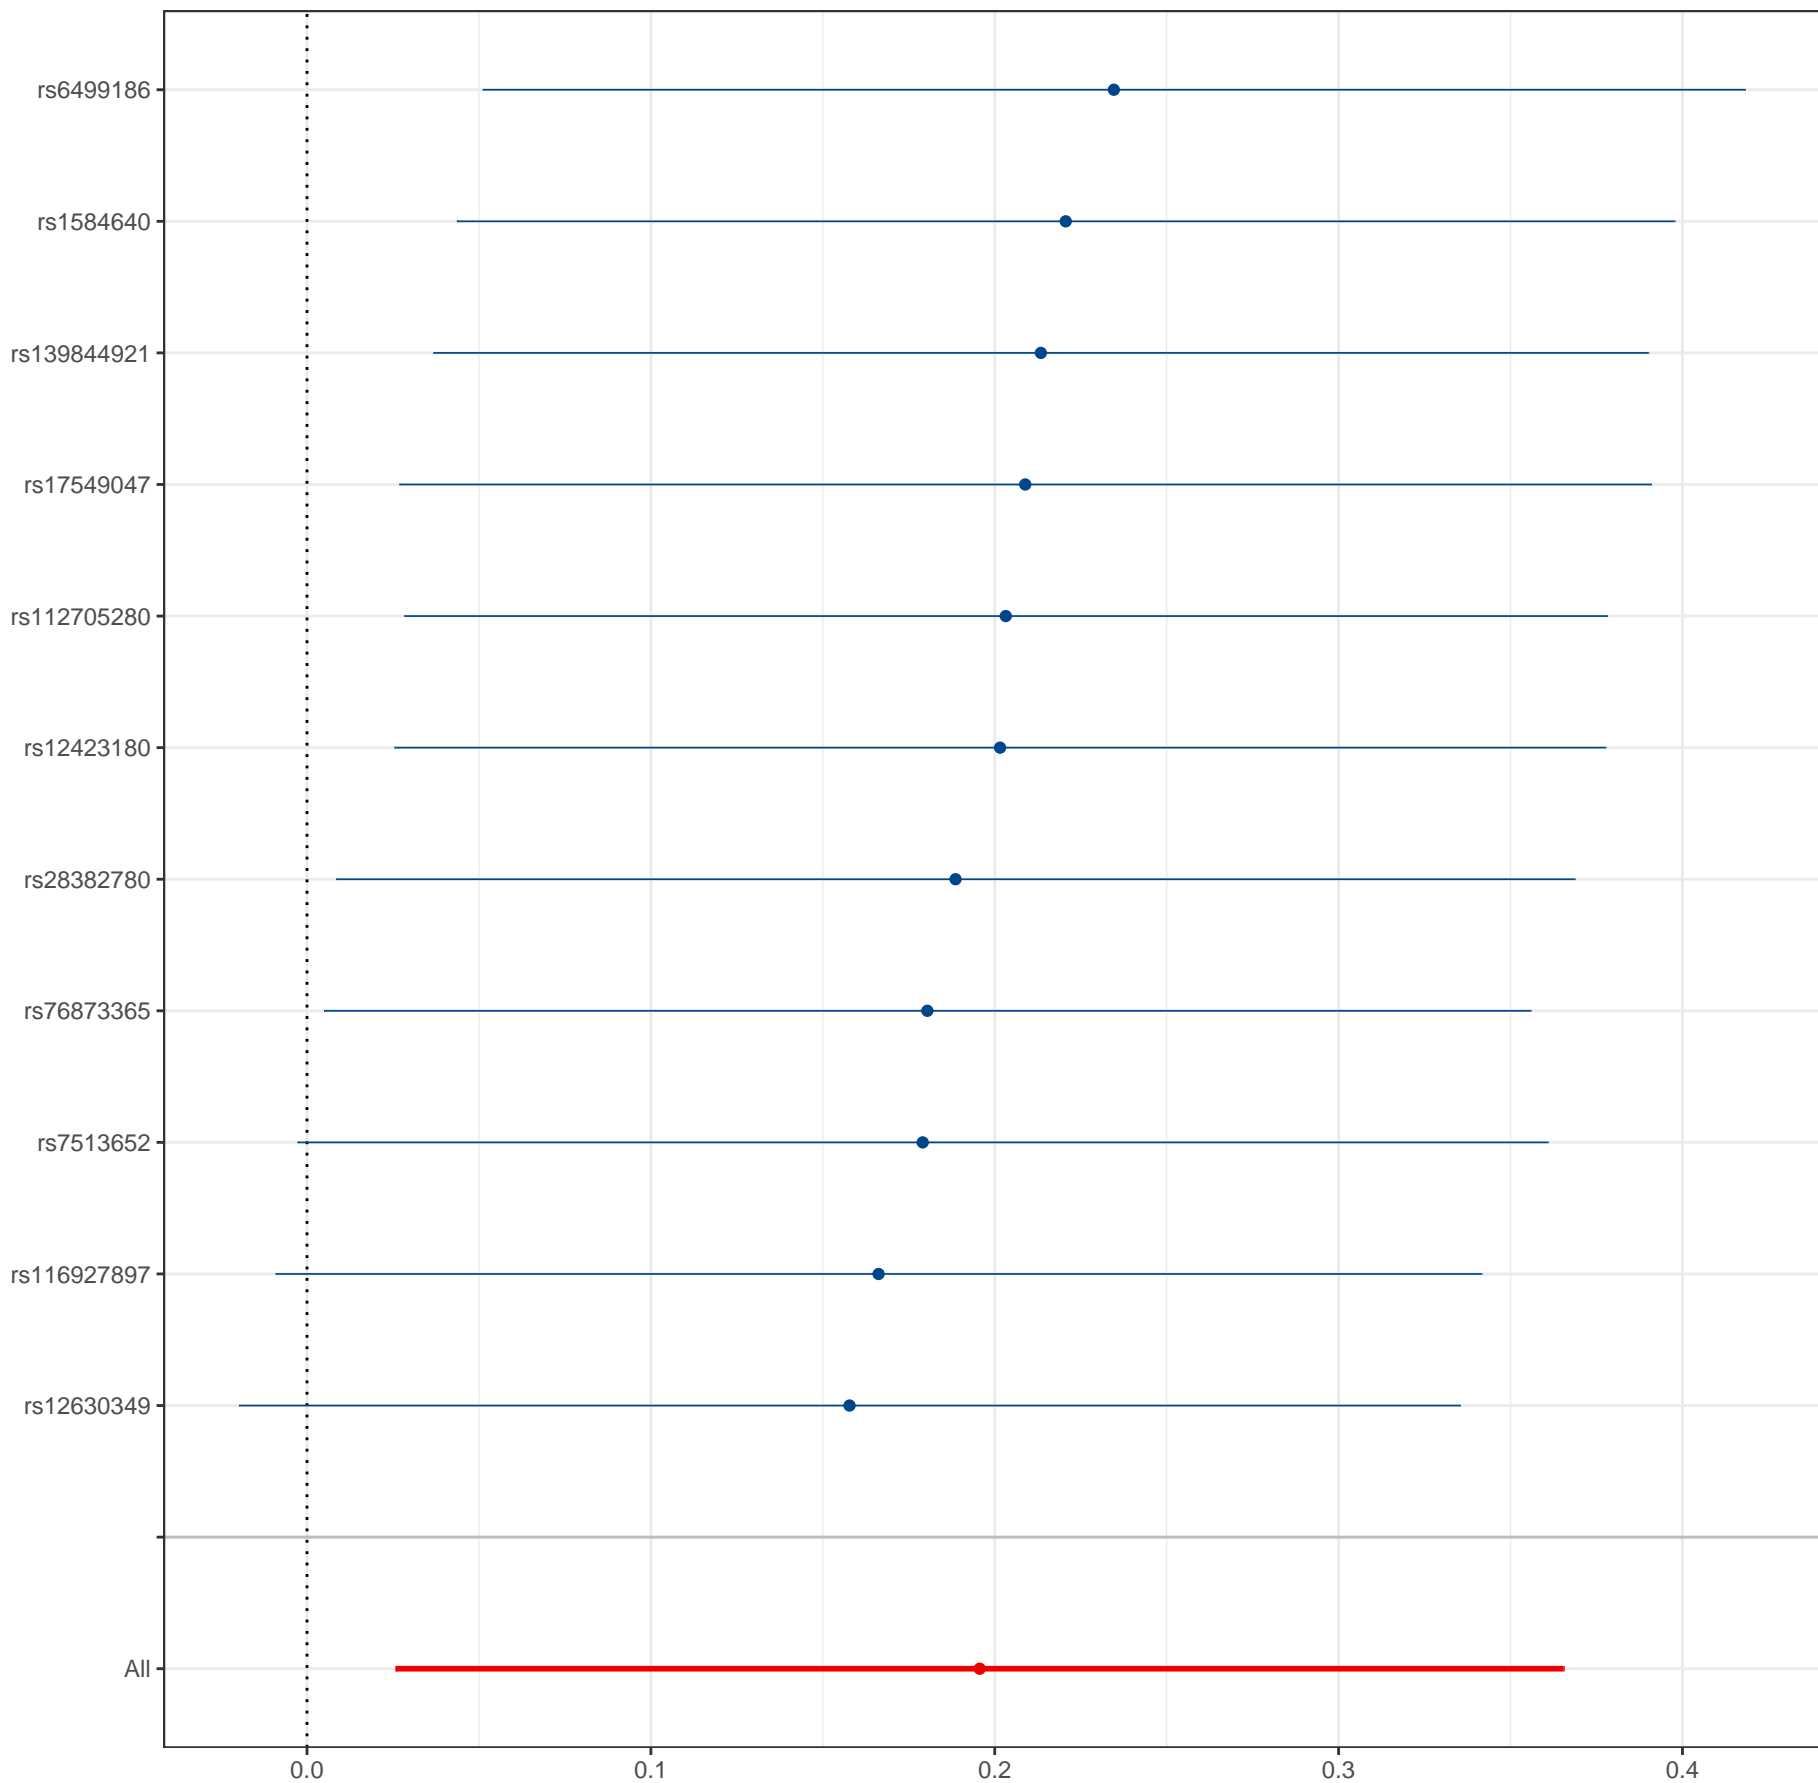

MR leave-one-out sensitivity analysis for 'X-22771 levels' on 'Parkinson's disease || id:ieu-b-7'

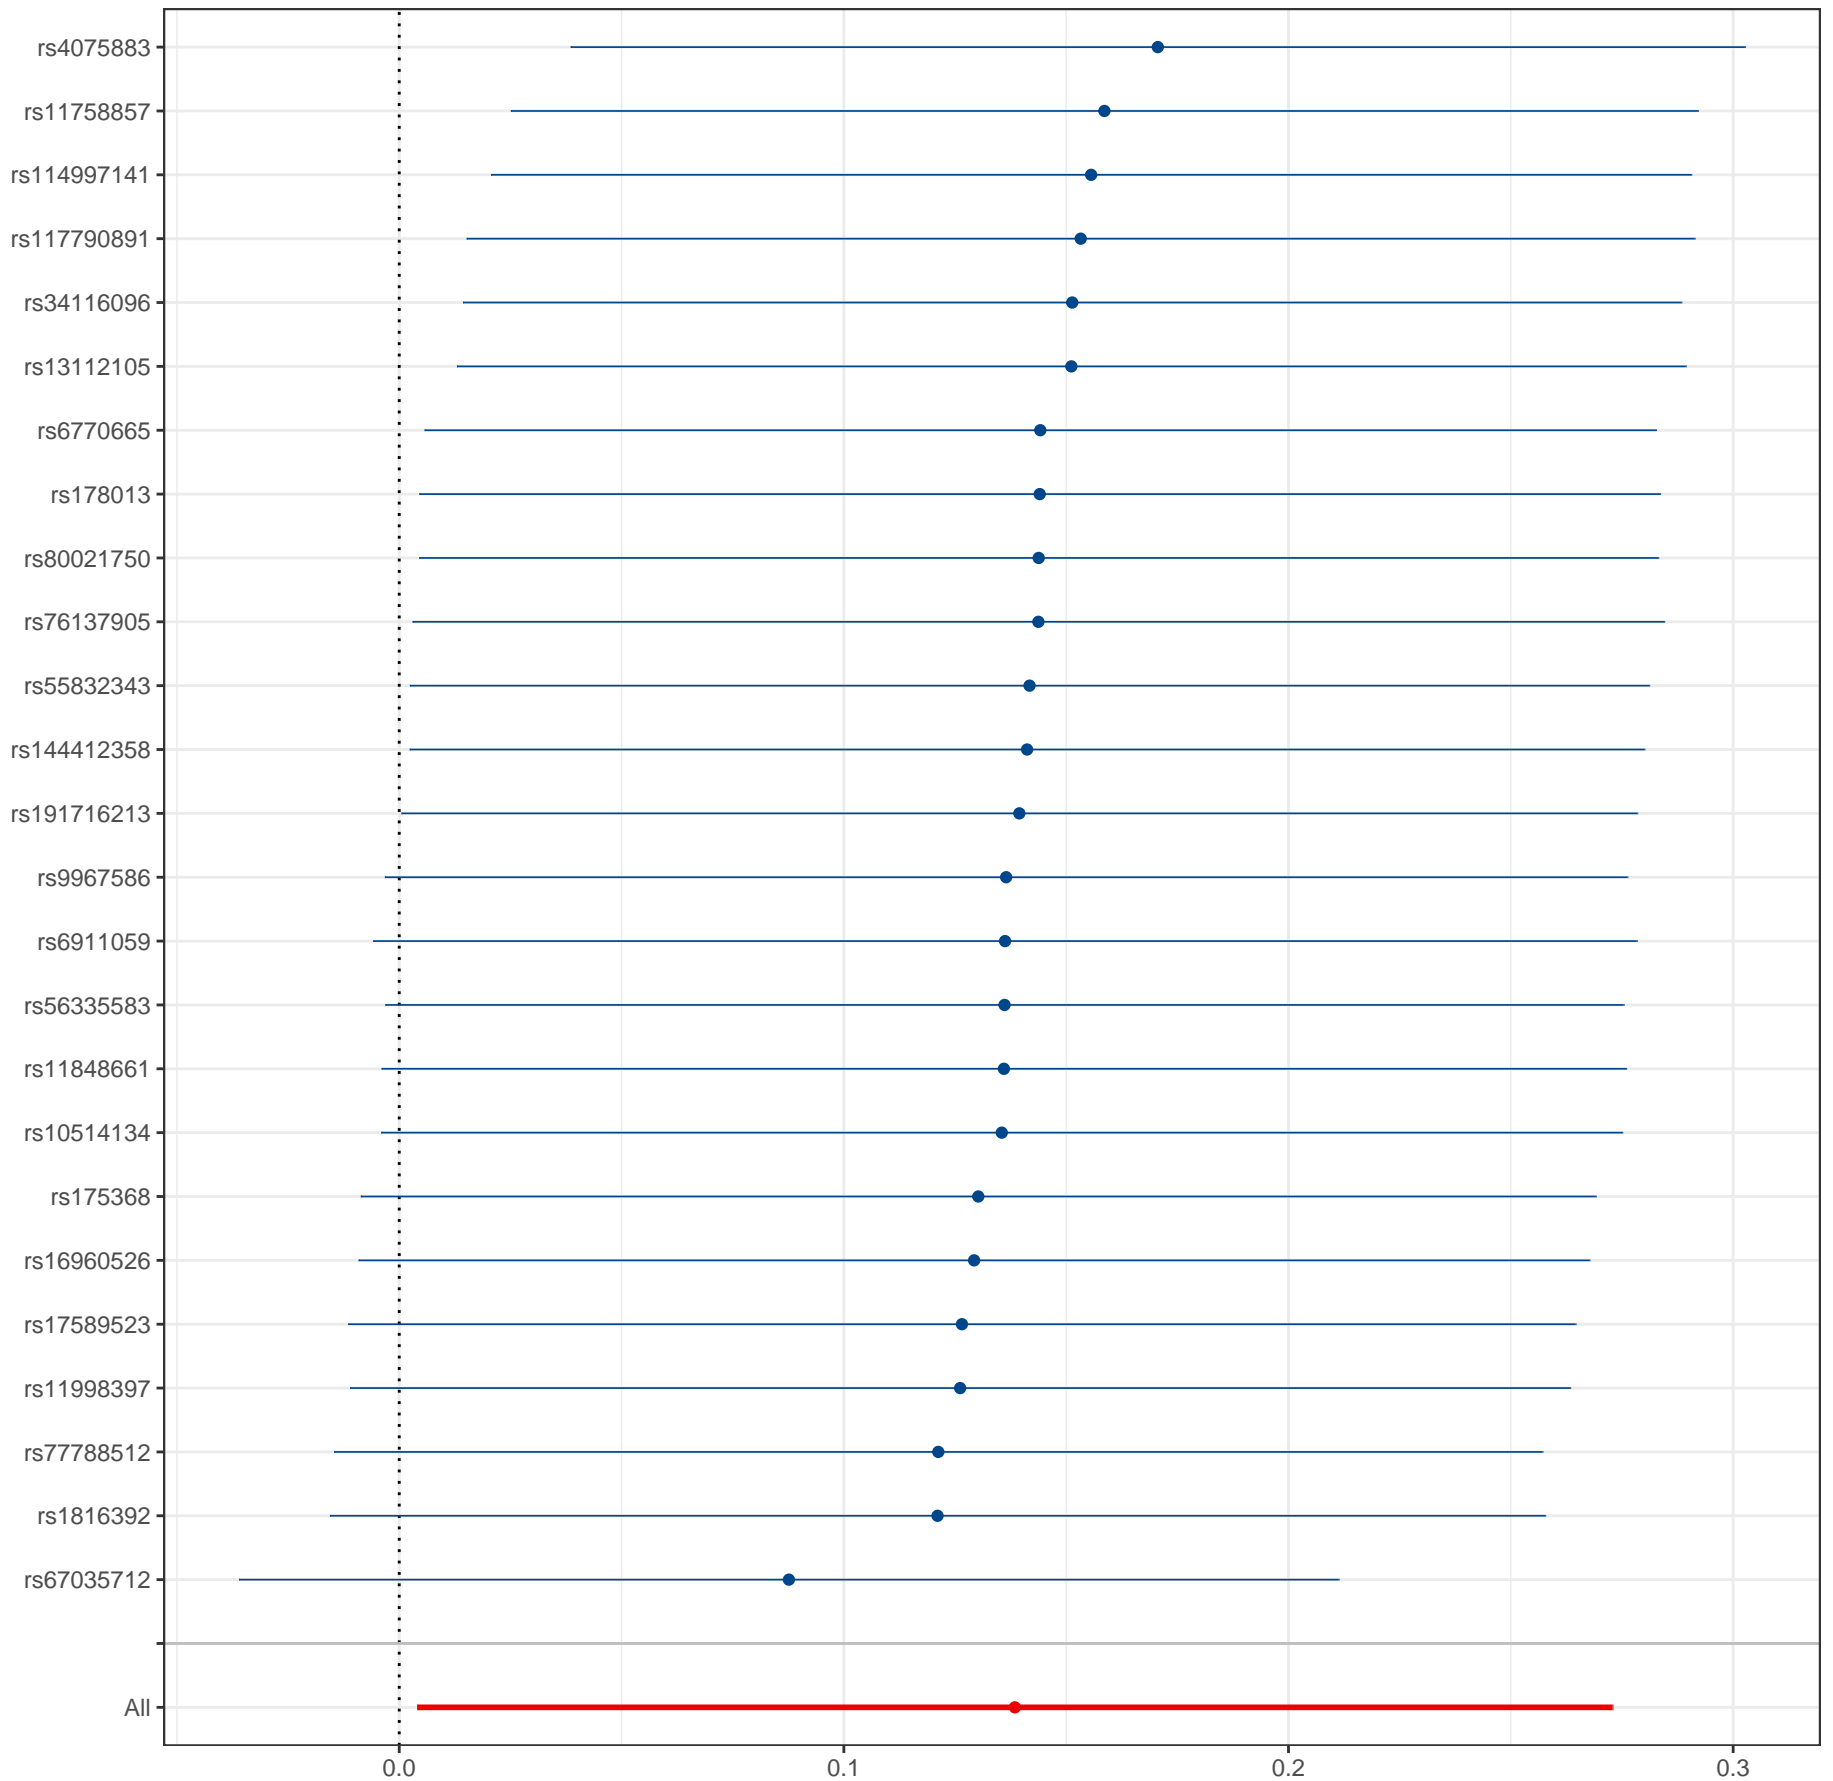



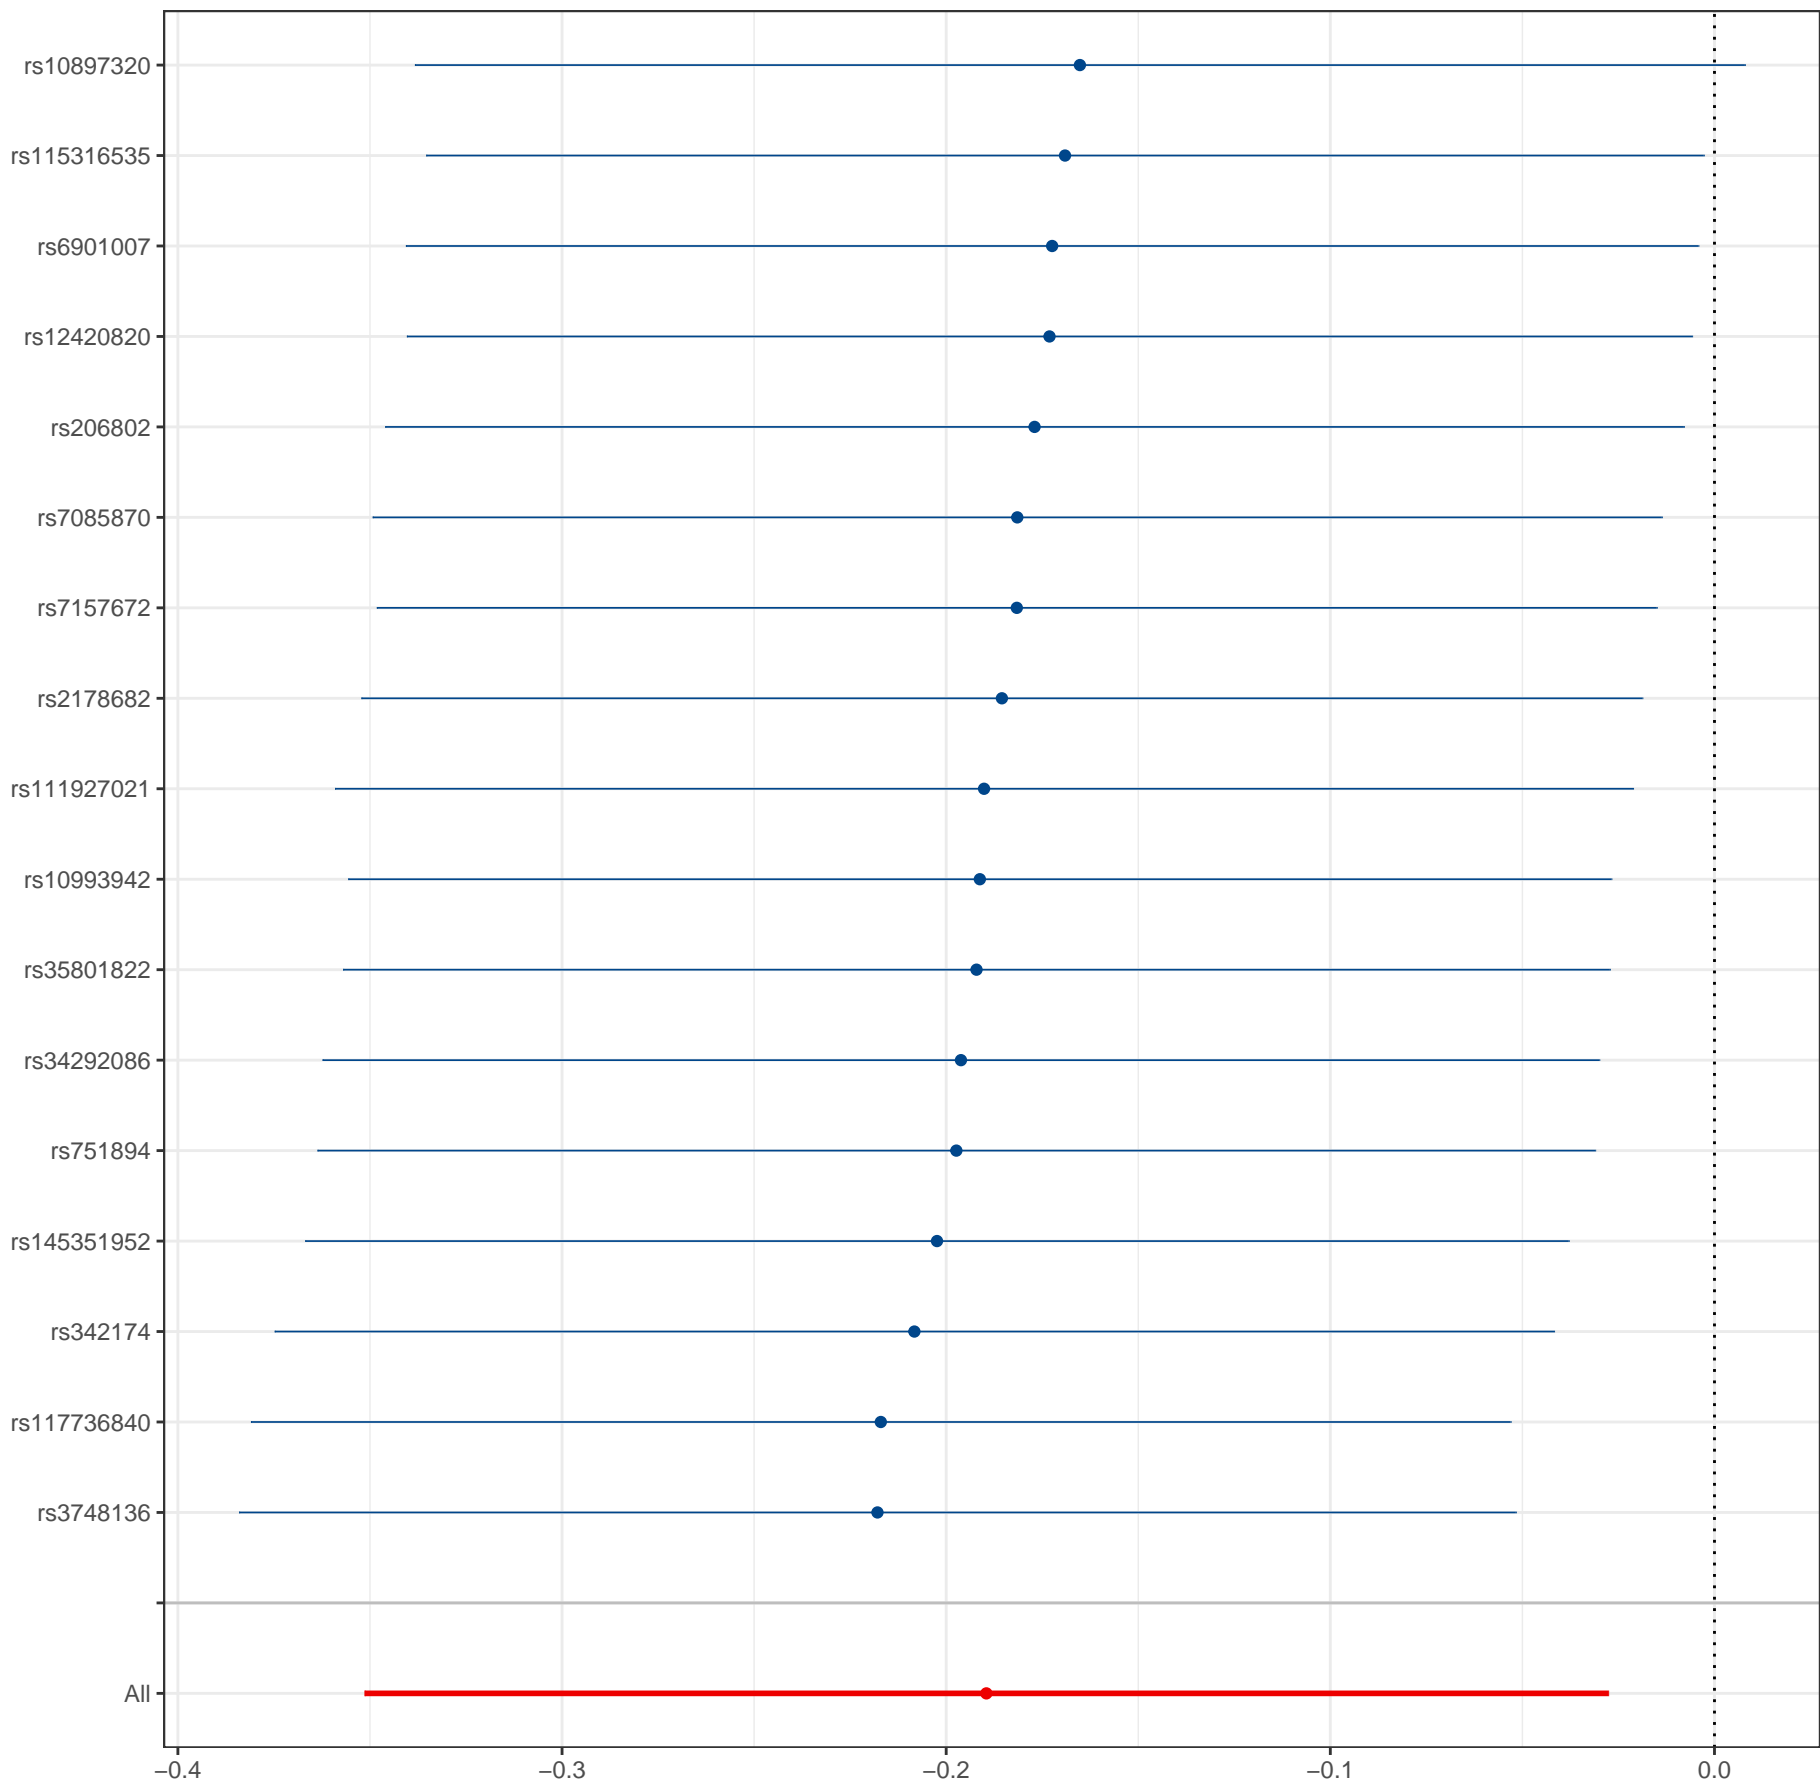

MR leave-one-out sensitivity analysis for 'Androsterone glucuronide levels' on 'Parkinson's disease || id:ieu-b-7'

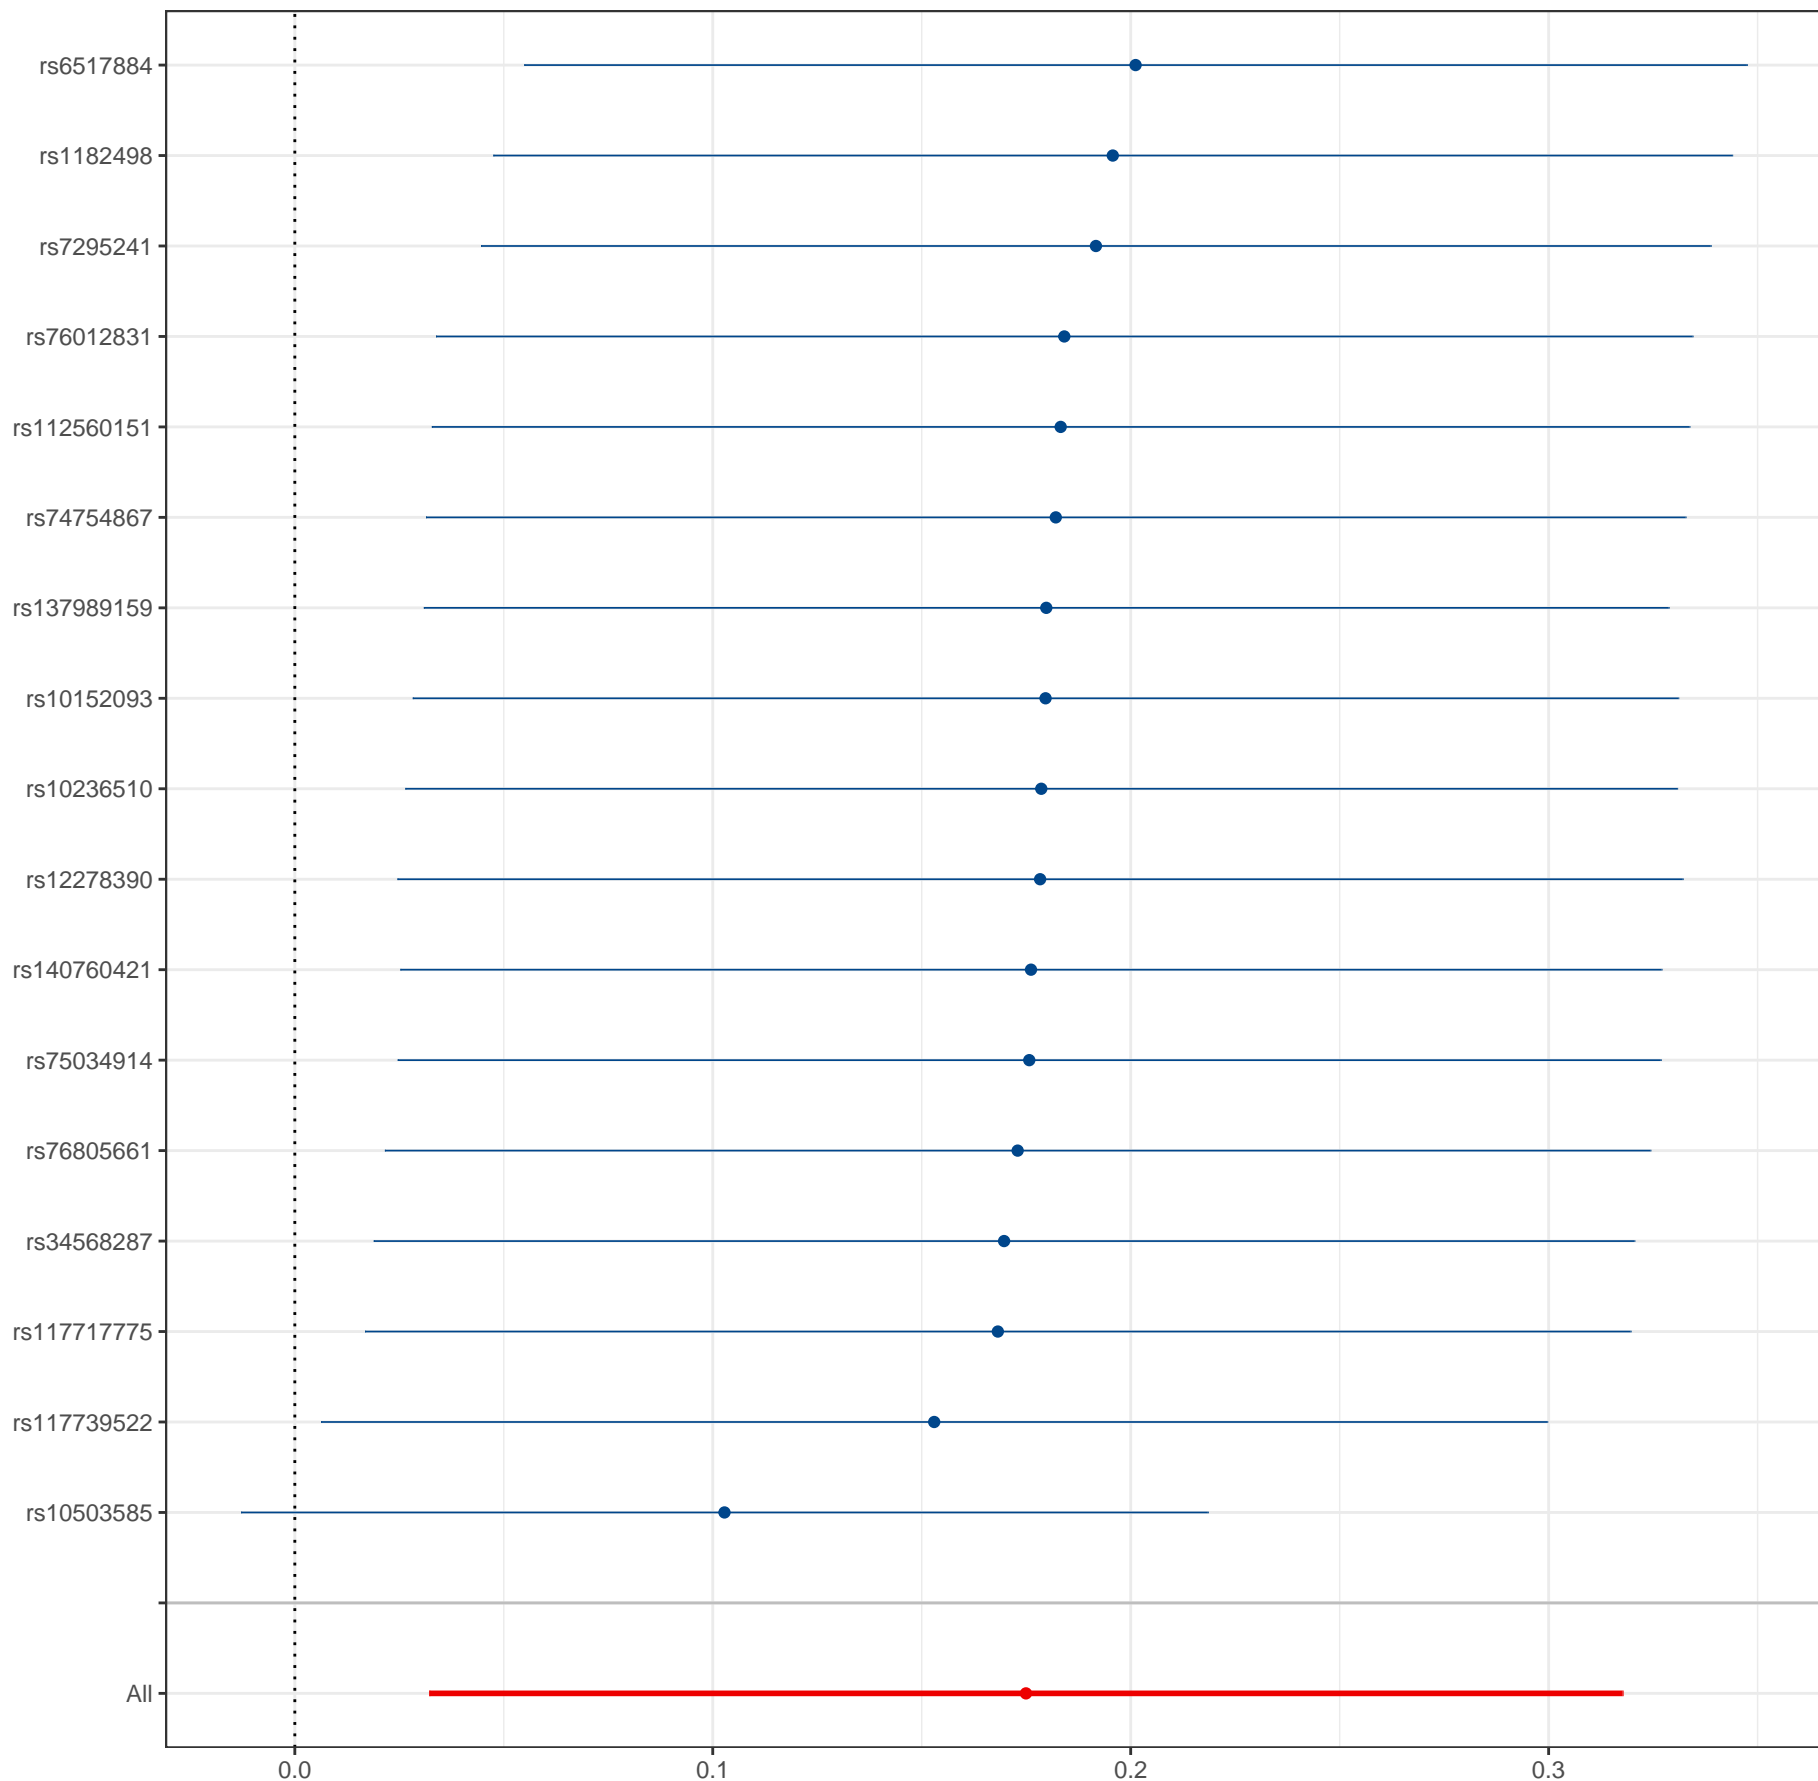

MR leave-one-out sensitivity analysis for 'Adenosine 5'-diphosphate (ADP) to 2'-deoxyuridine ratio' on 'Parkinson's disease || id:ieu-b-7'

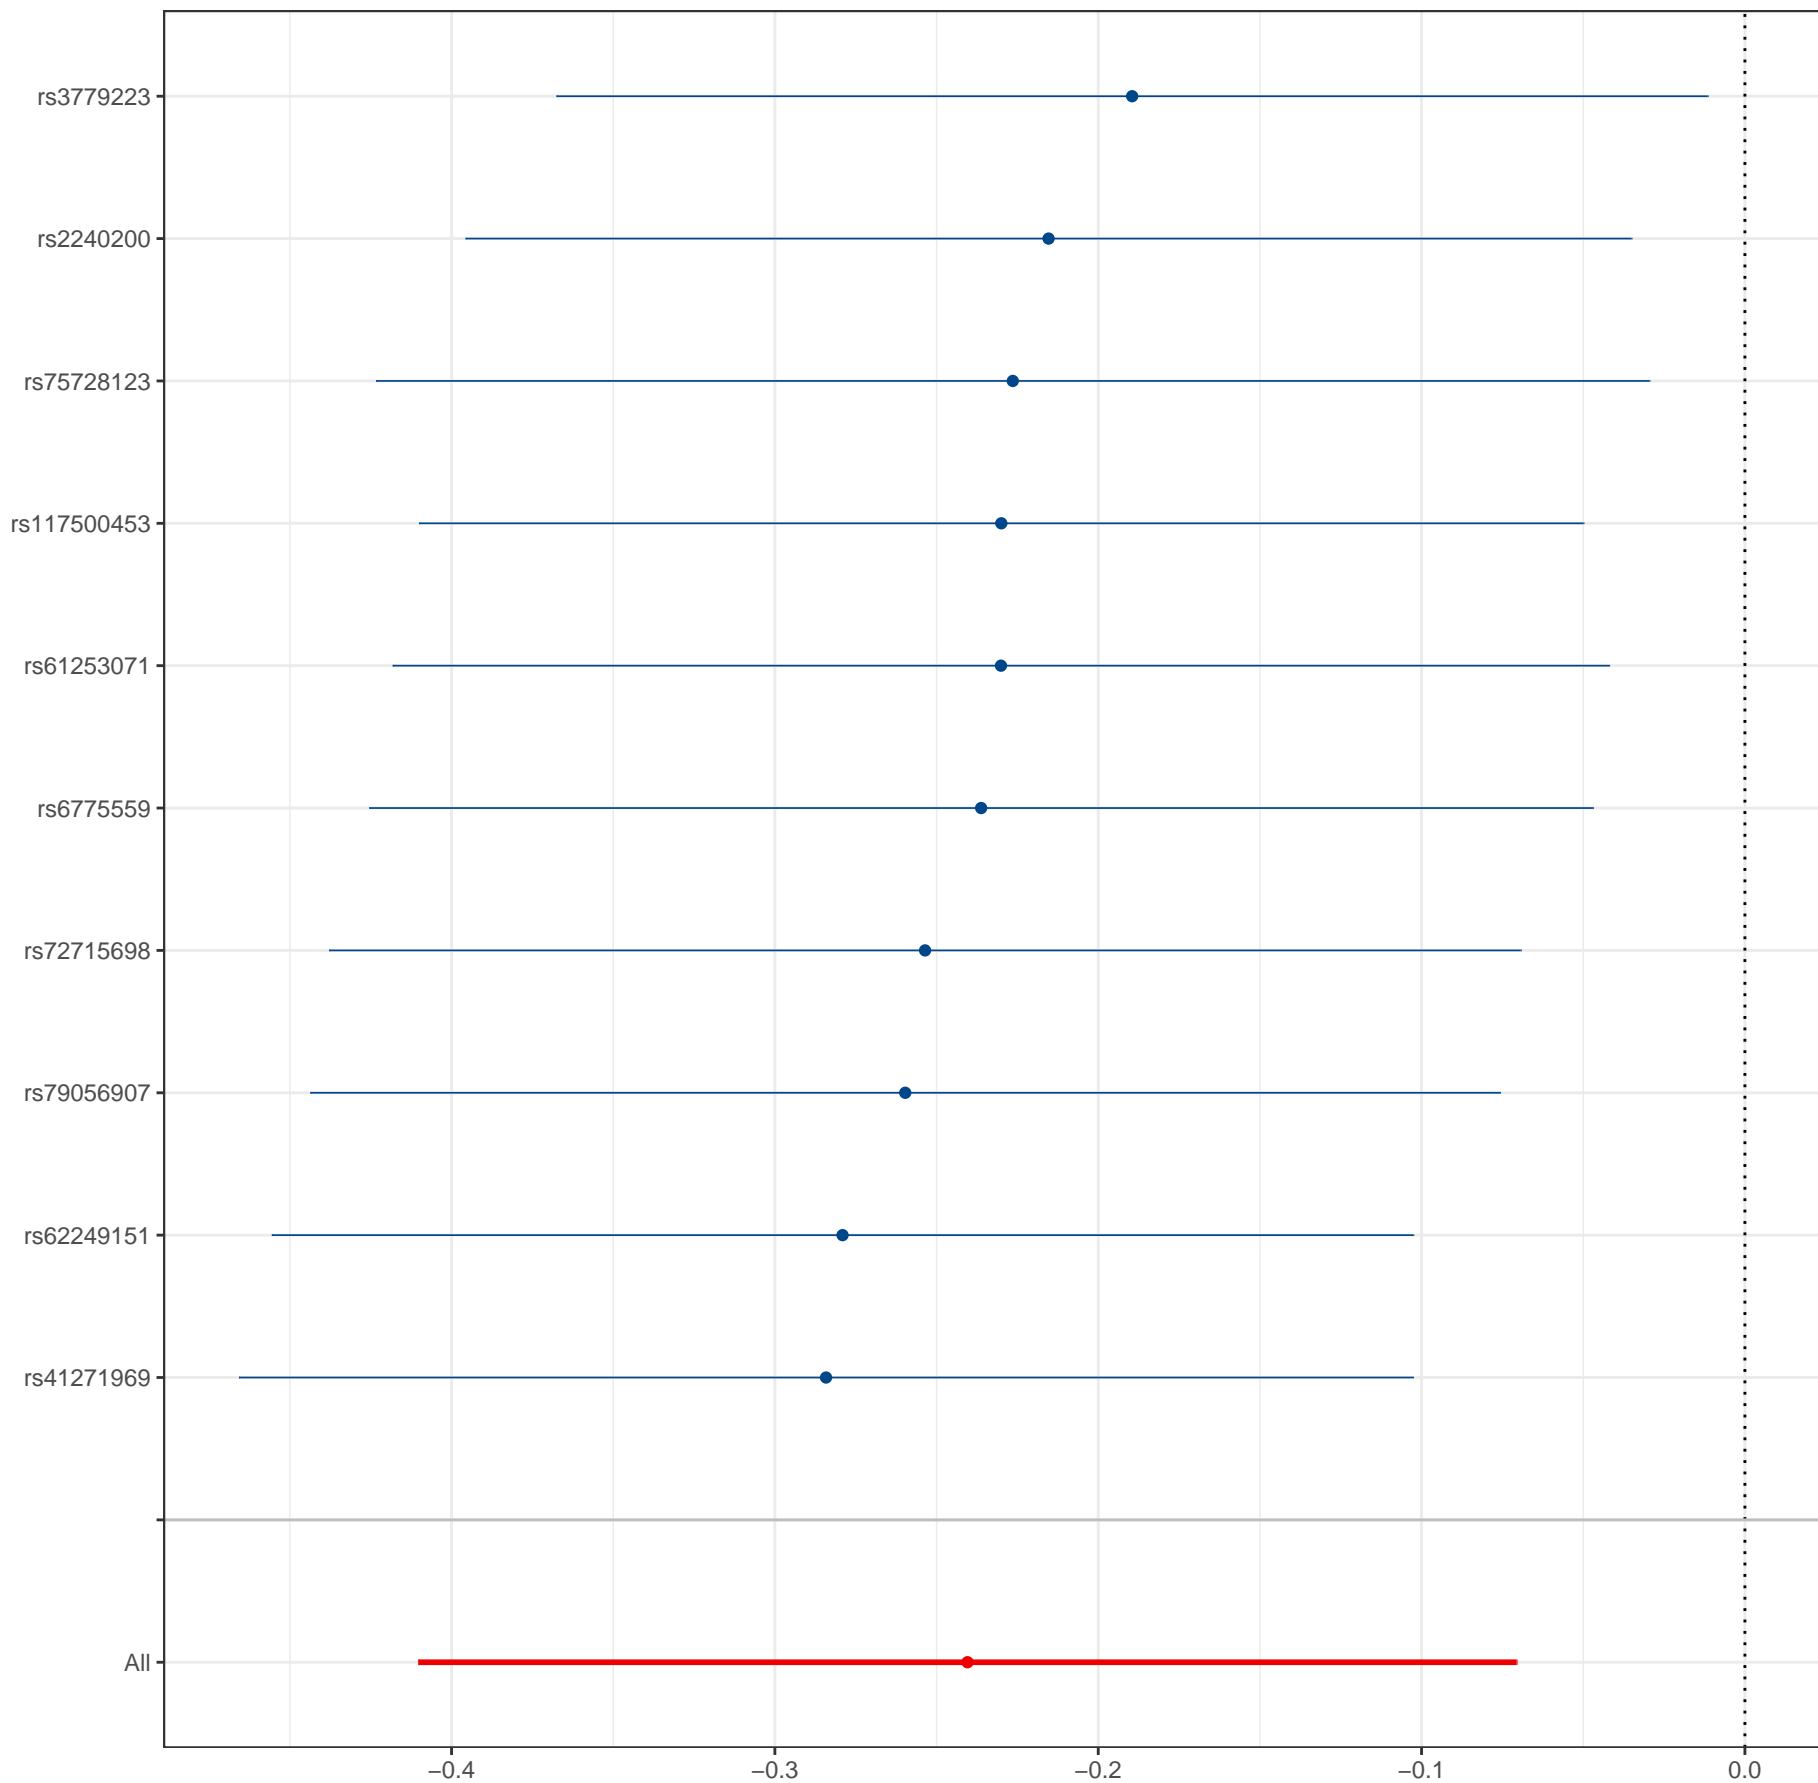

MR leave-one-out sensitivity analysis for  
'Succinate to acetoacetate ratio' on 'Parkinson's disease || id:ieu-b-7'

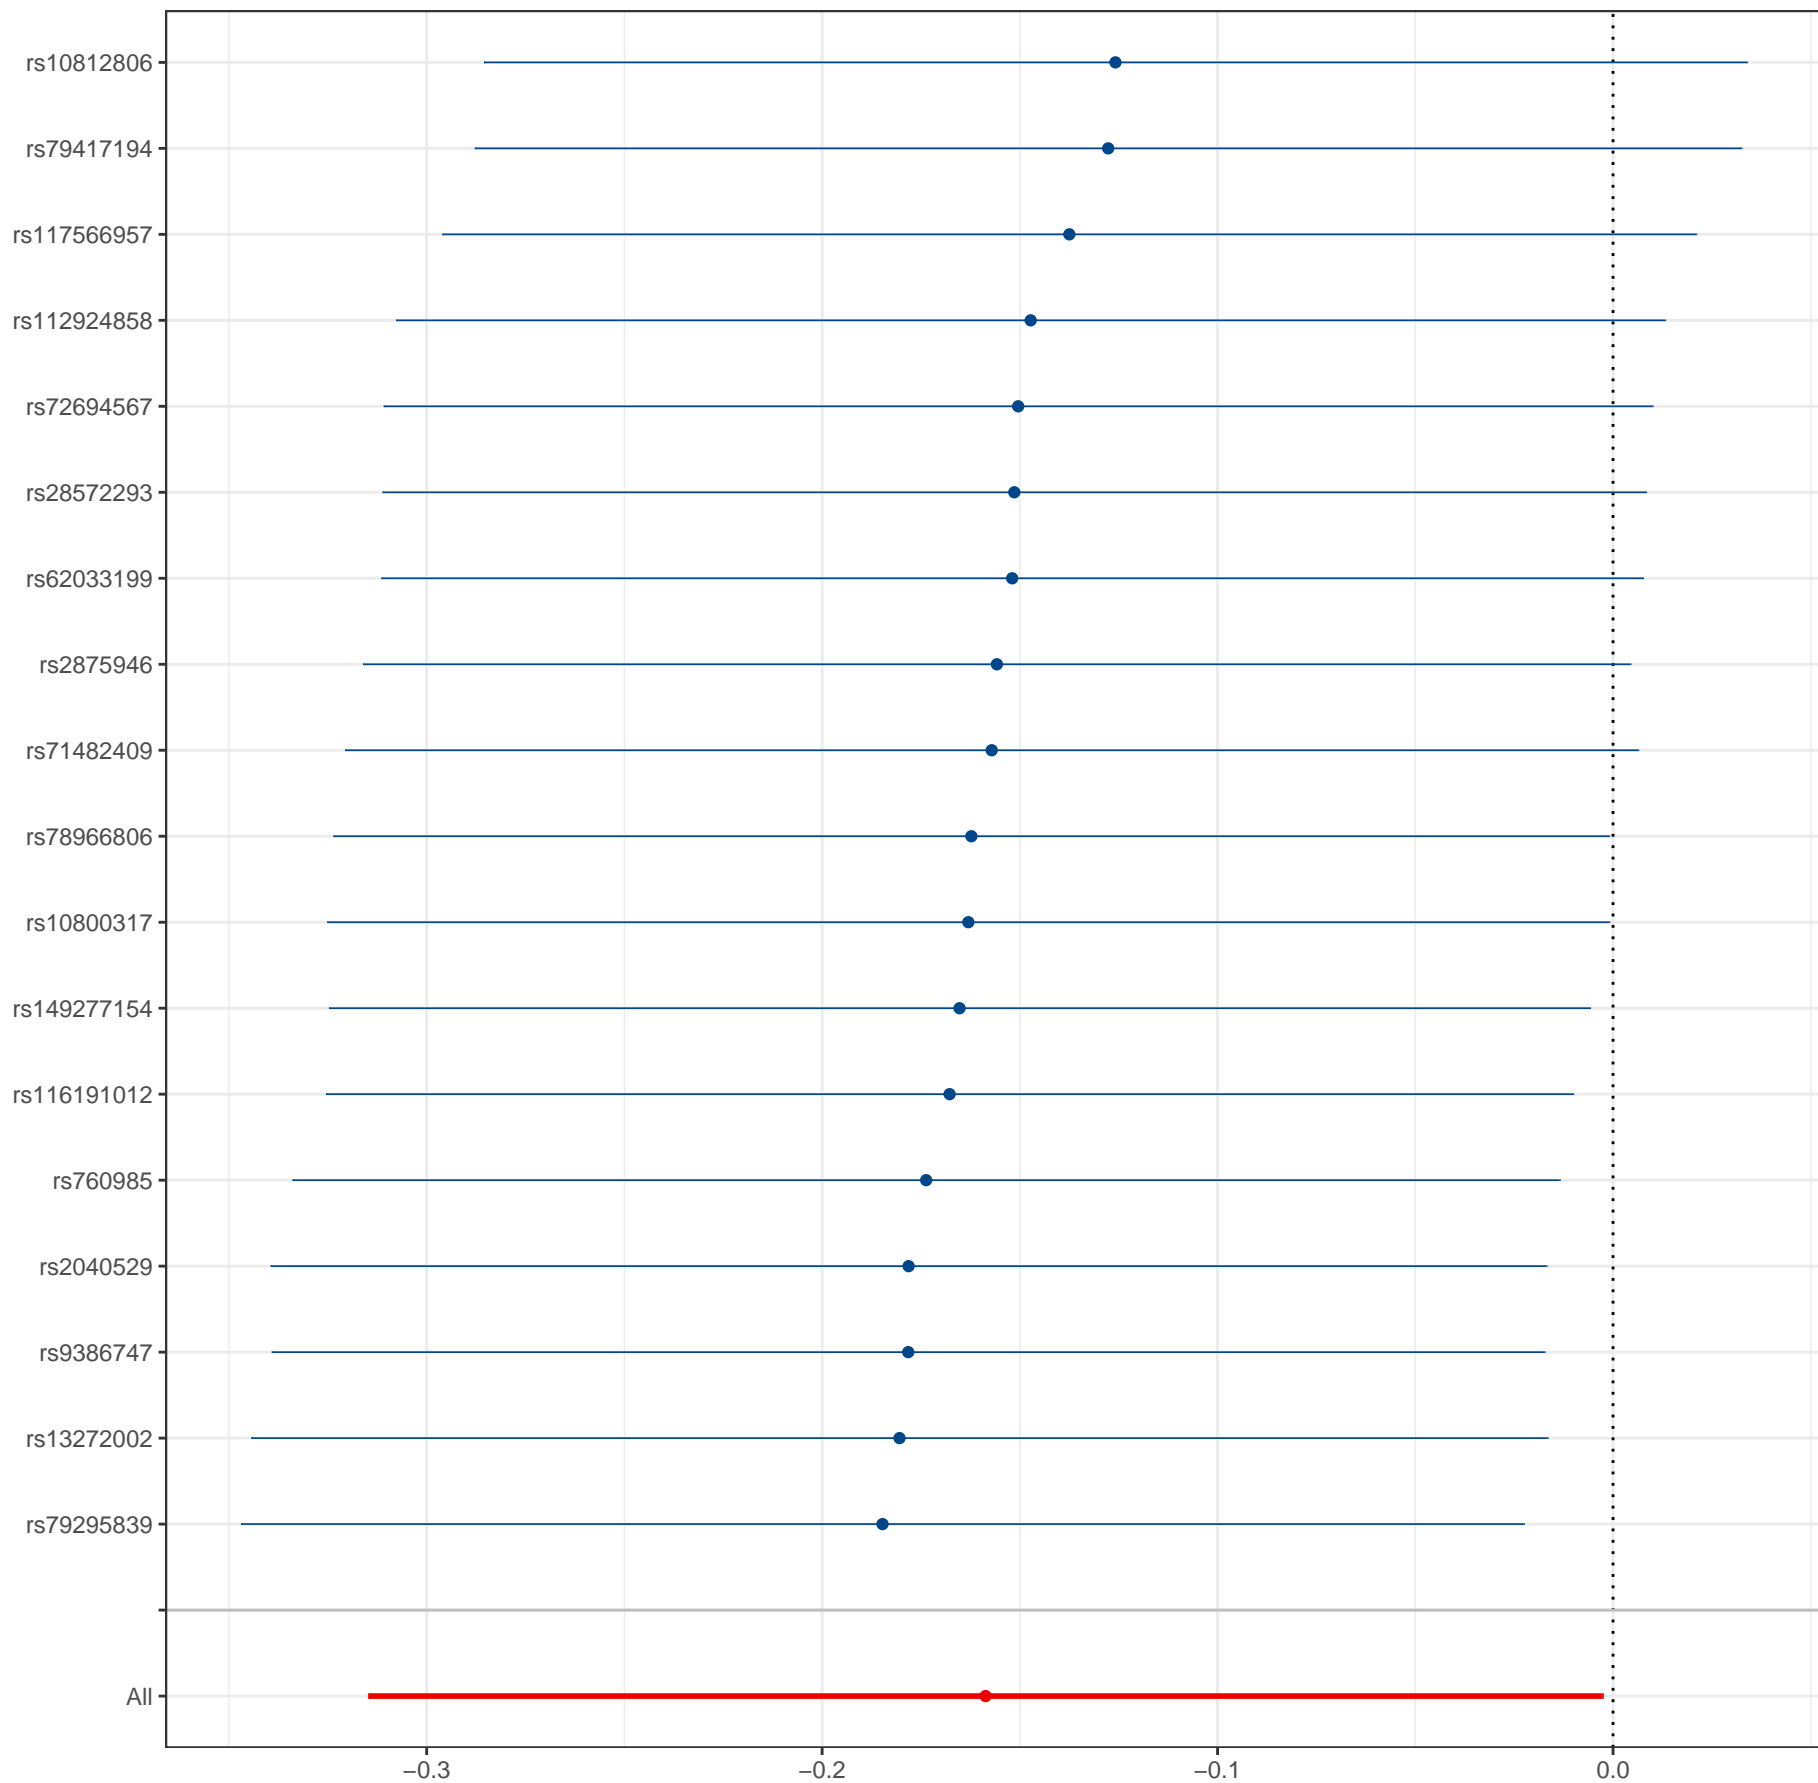

MR leave-one-out sensitivity analysis for 'Palmitate (16:0) to myristate (14:0) ratio' on 'Parkinson's disease || id:ieu-b-7'

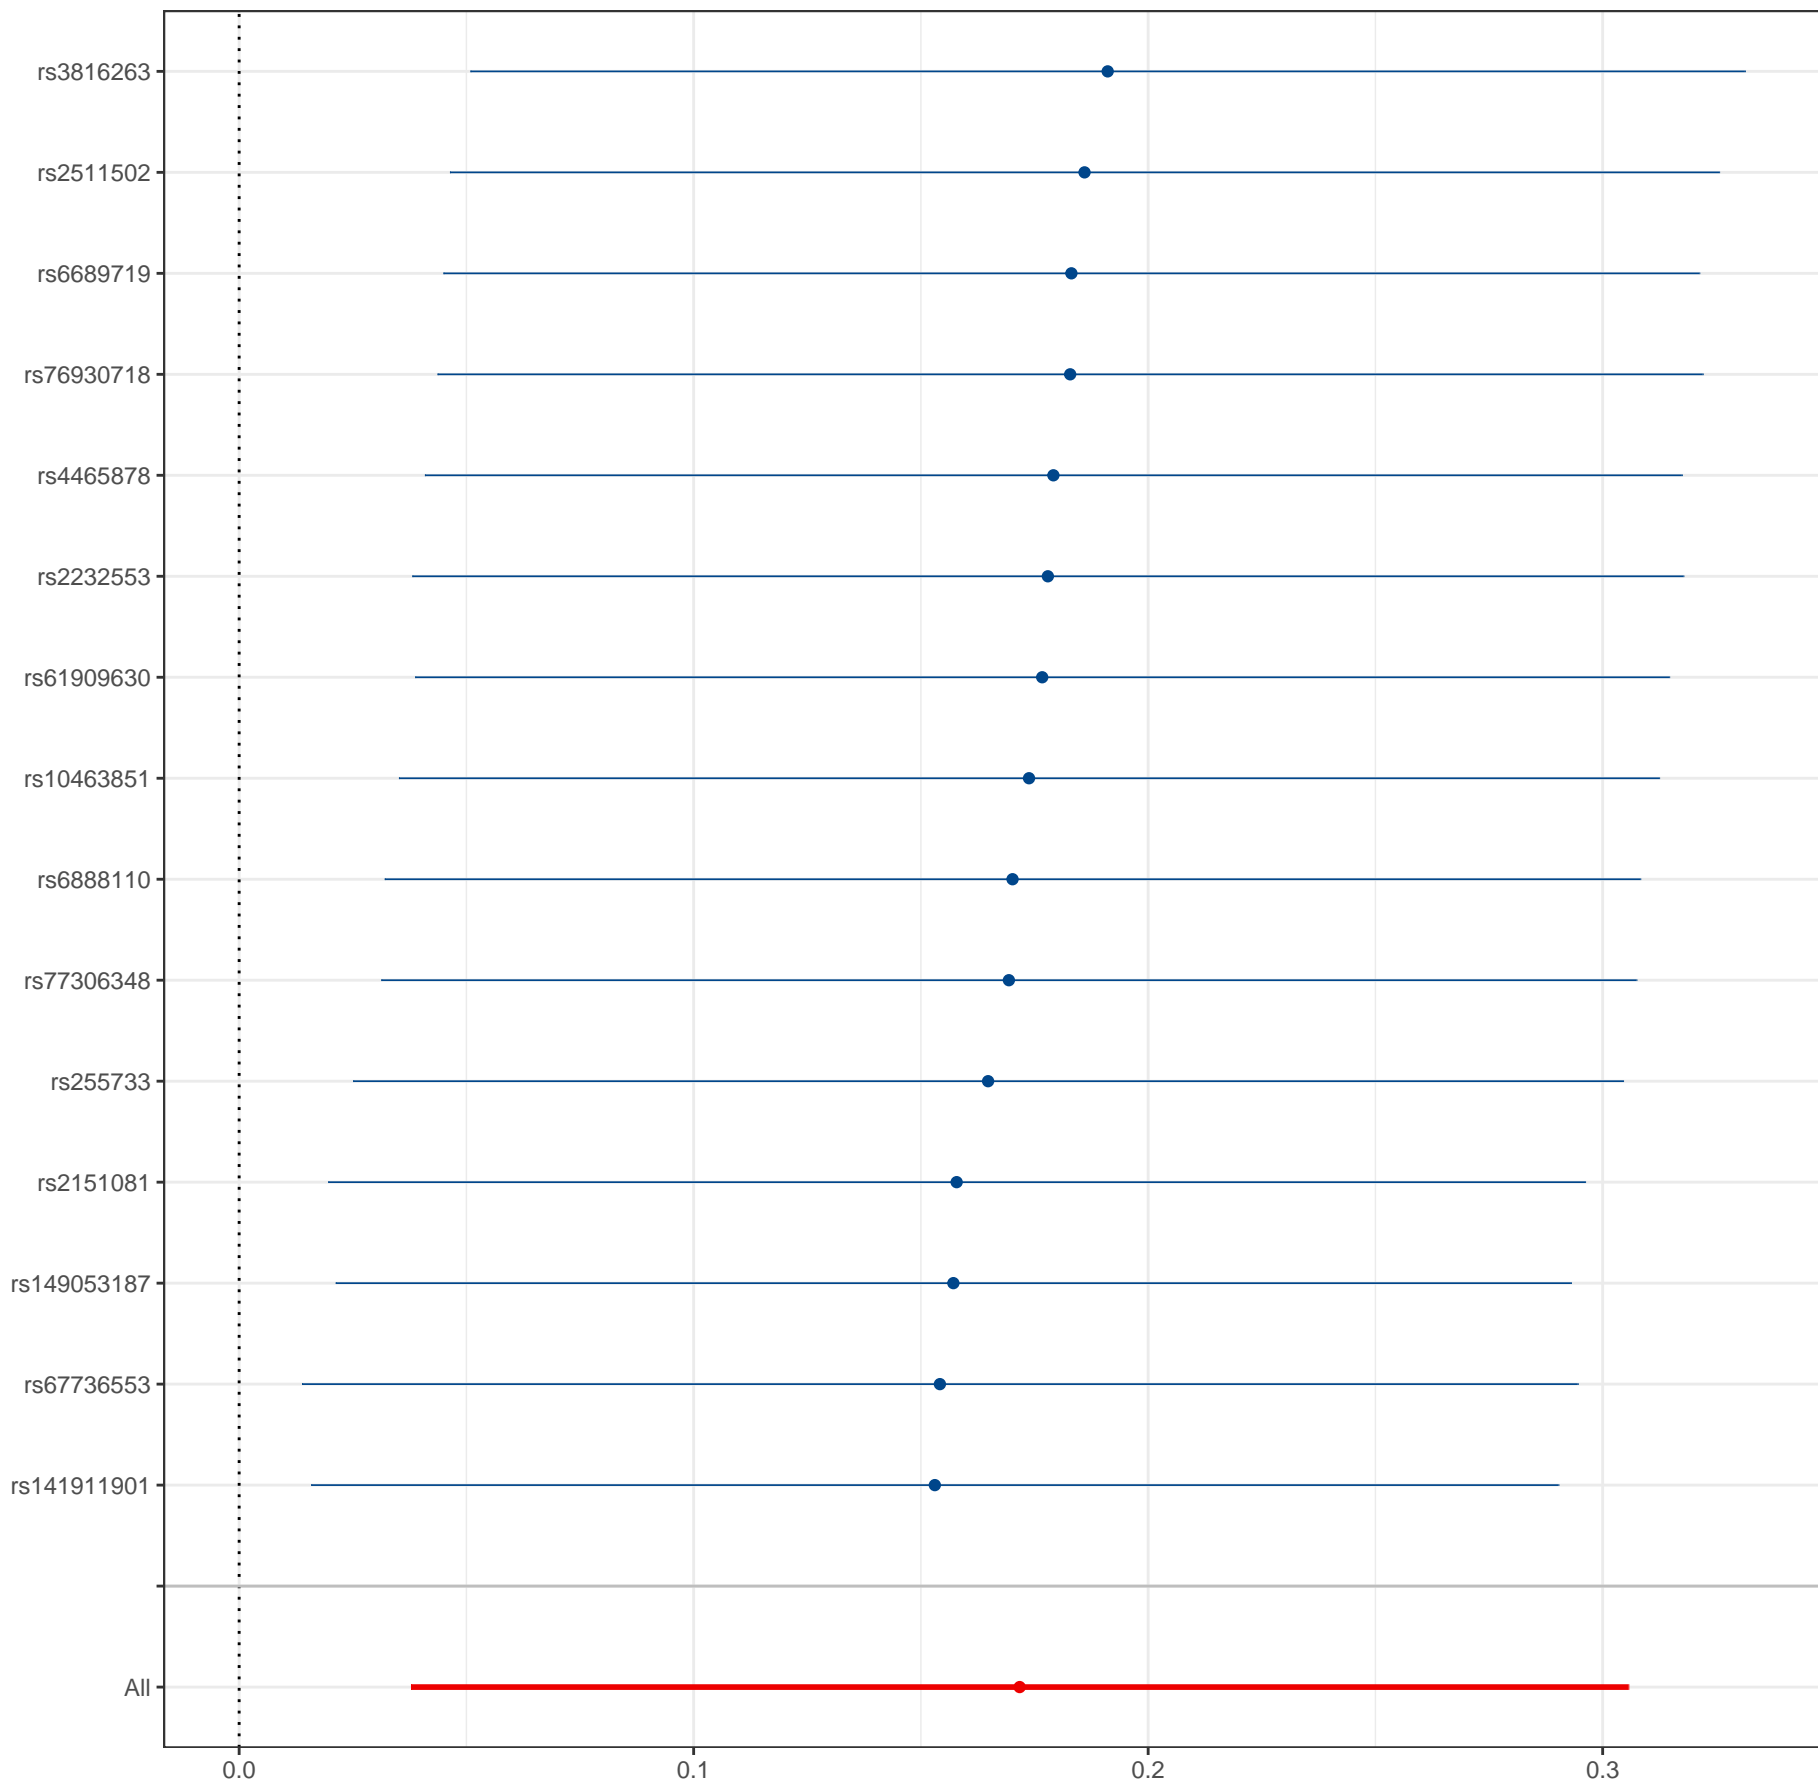

MR leave-one-out sensitivity analysis for 'Glucose to maltose ratio' on 'Parkinson's disease || id:ieu-b-7'

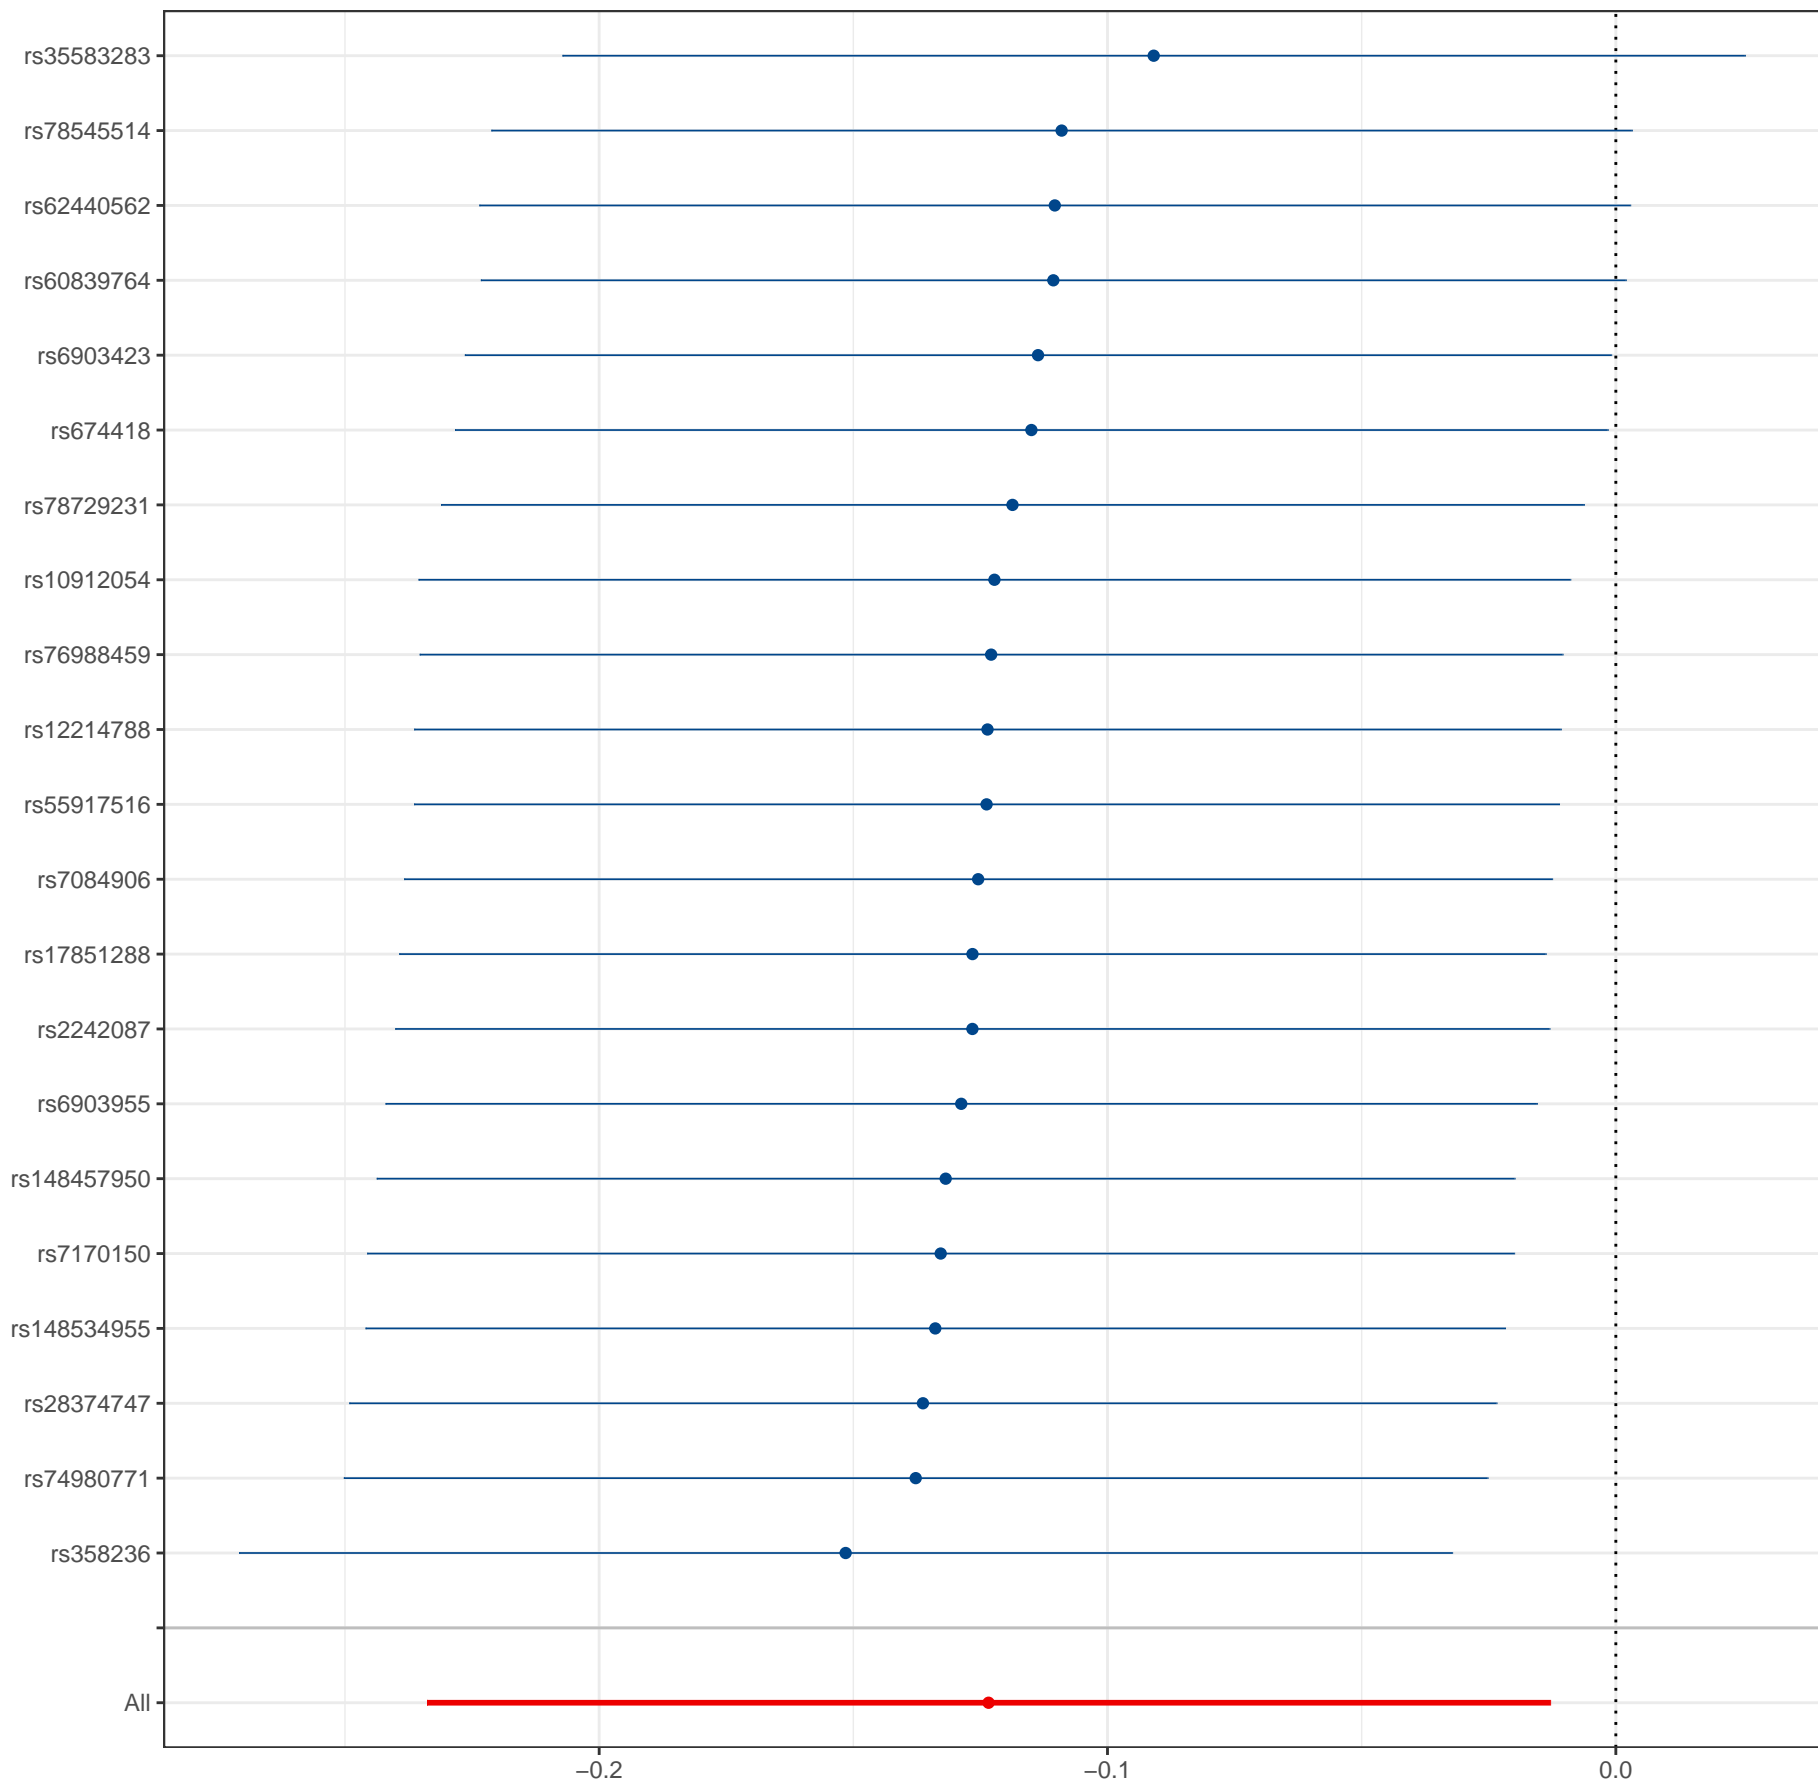

MR leave-one-out sensitivity analysis for 'Dopamine 4-sulfate to dopamine 3-O-sulfate ratio' on 'Parkinson's disease || id:ieu-b-7'

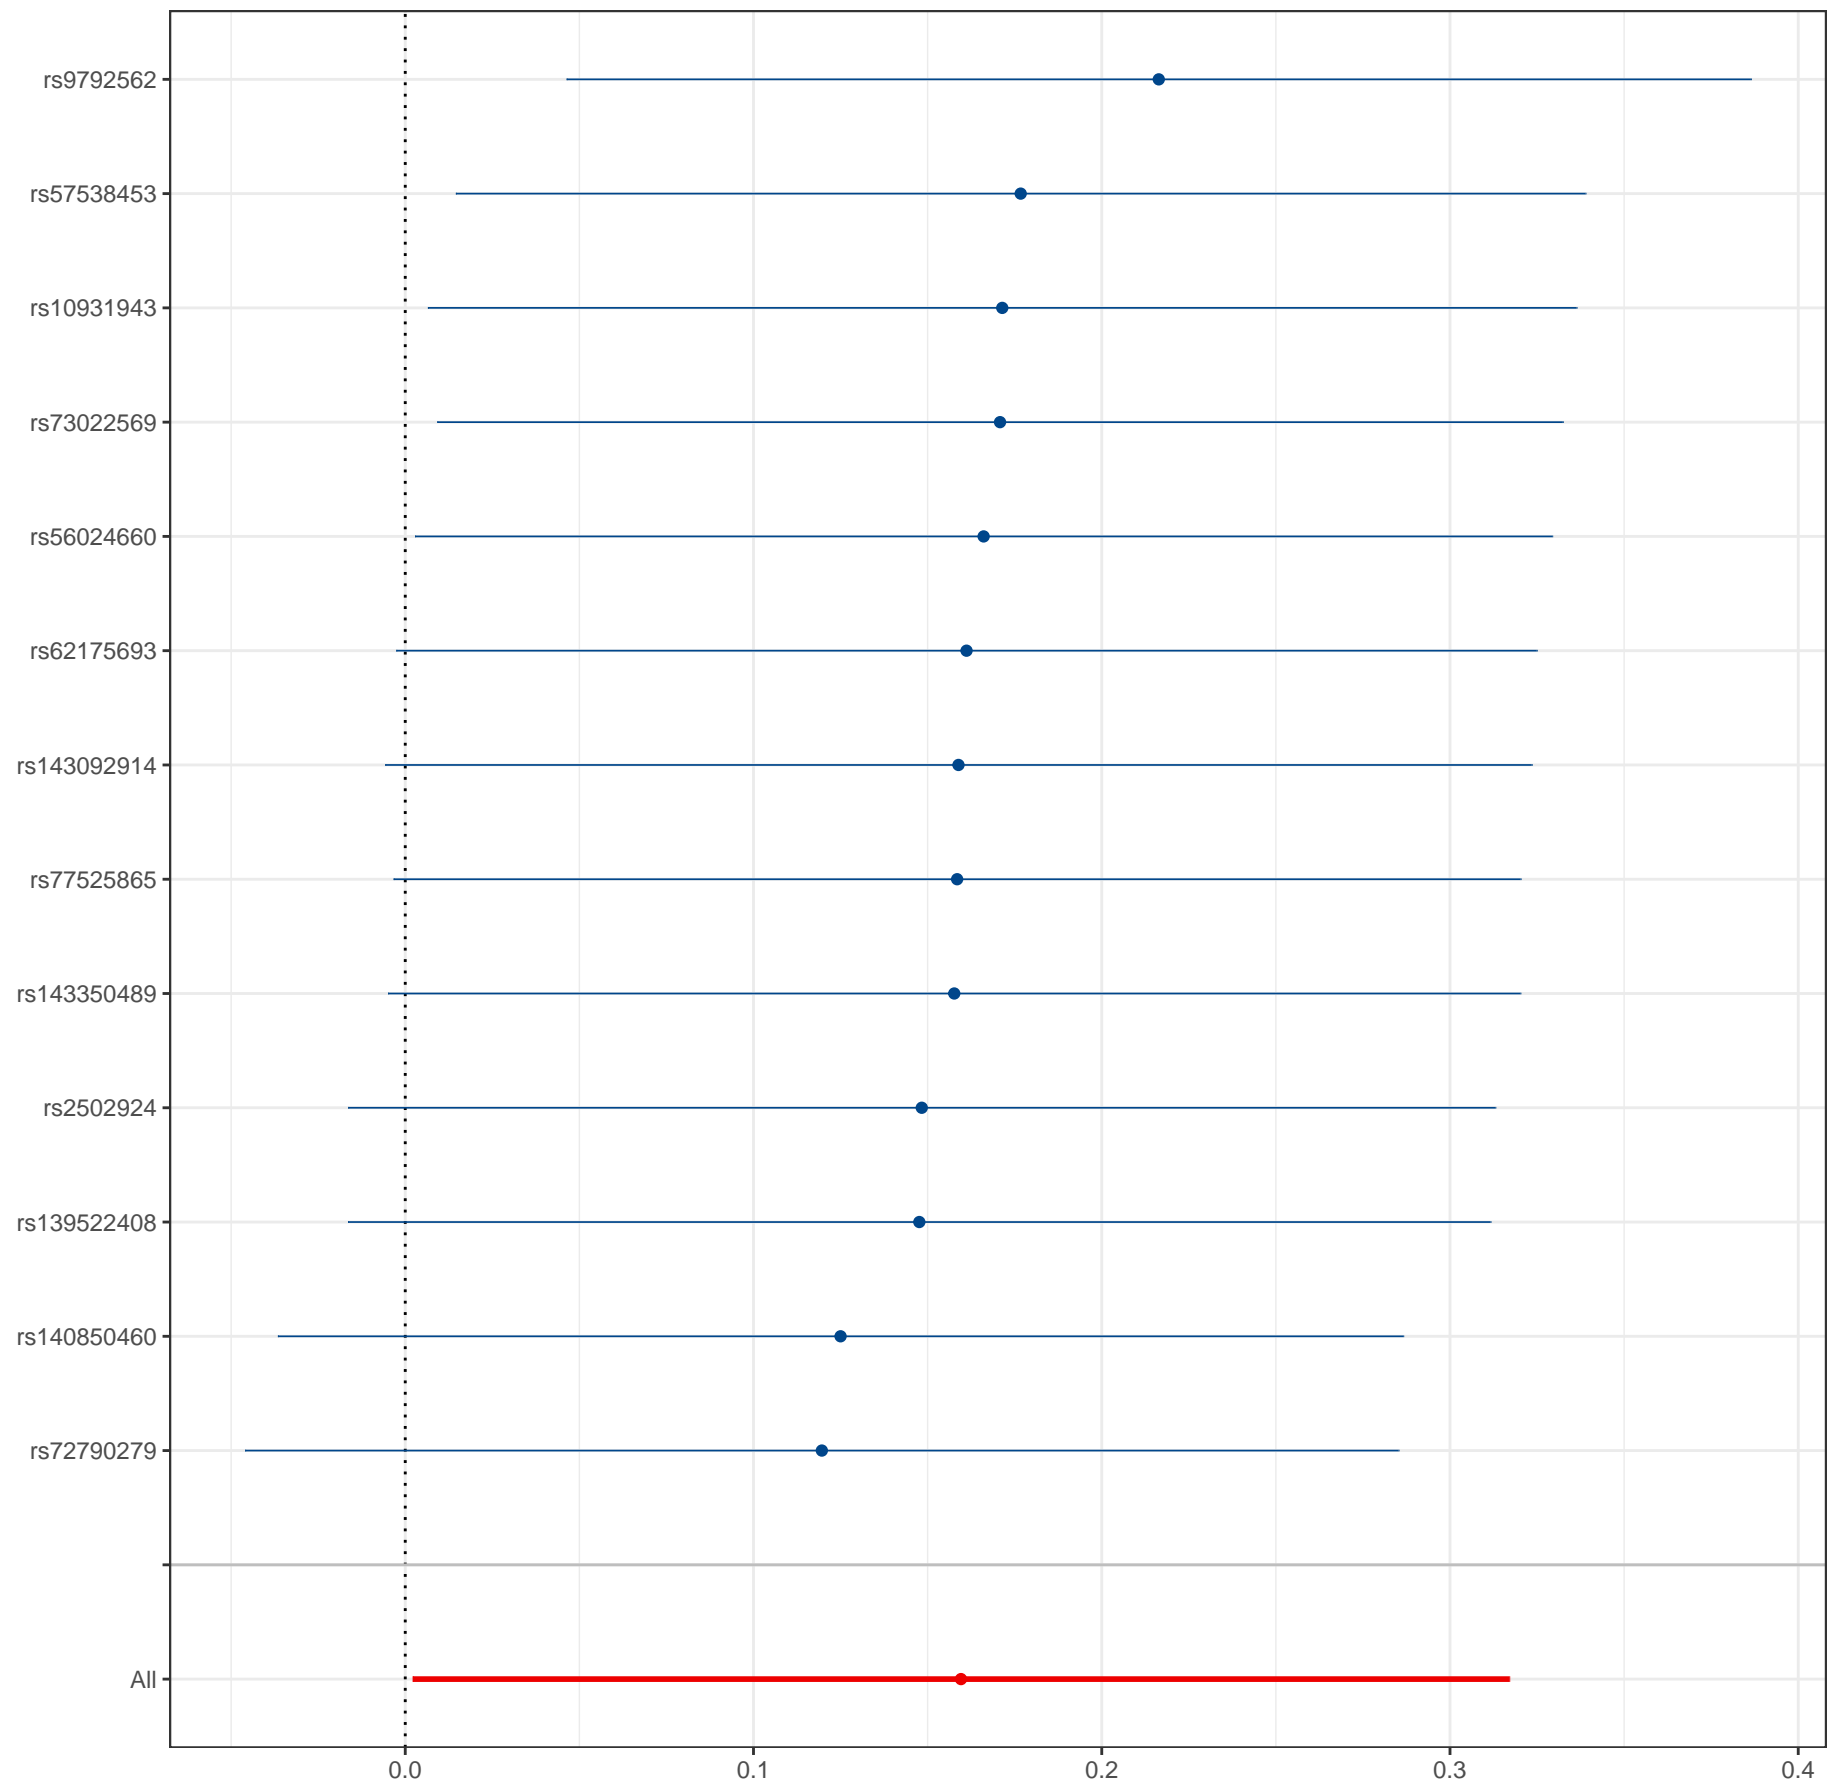

MR leave-one-out sensitivity analysis for 'Histidine to pyruvate ratio' on 'Parkinson's disease || id:ieu-b-7'

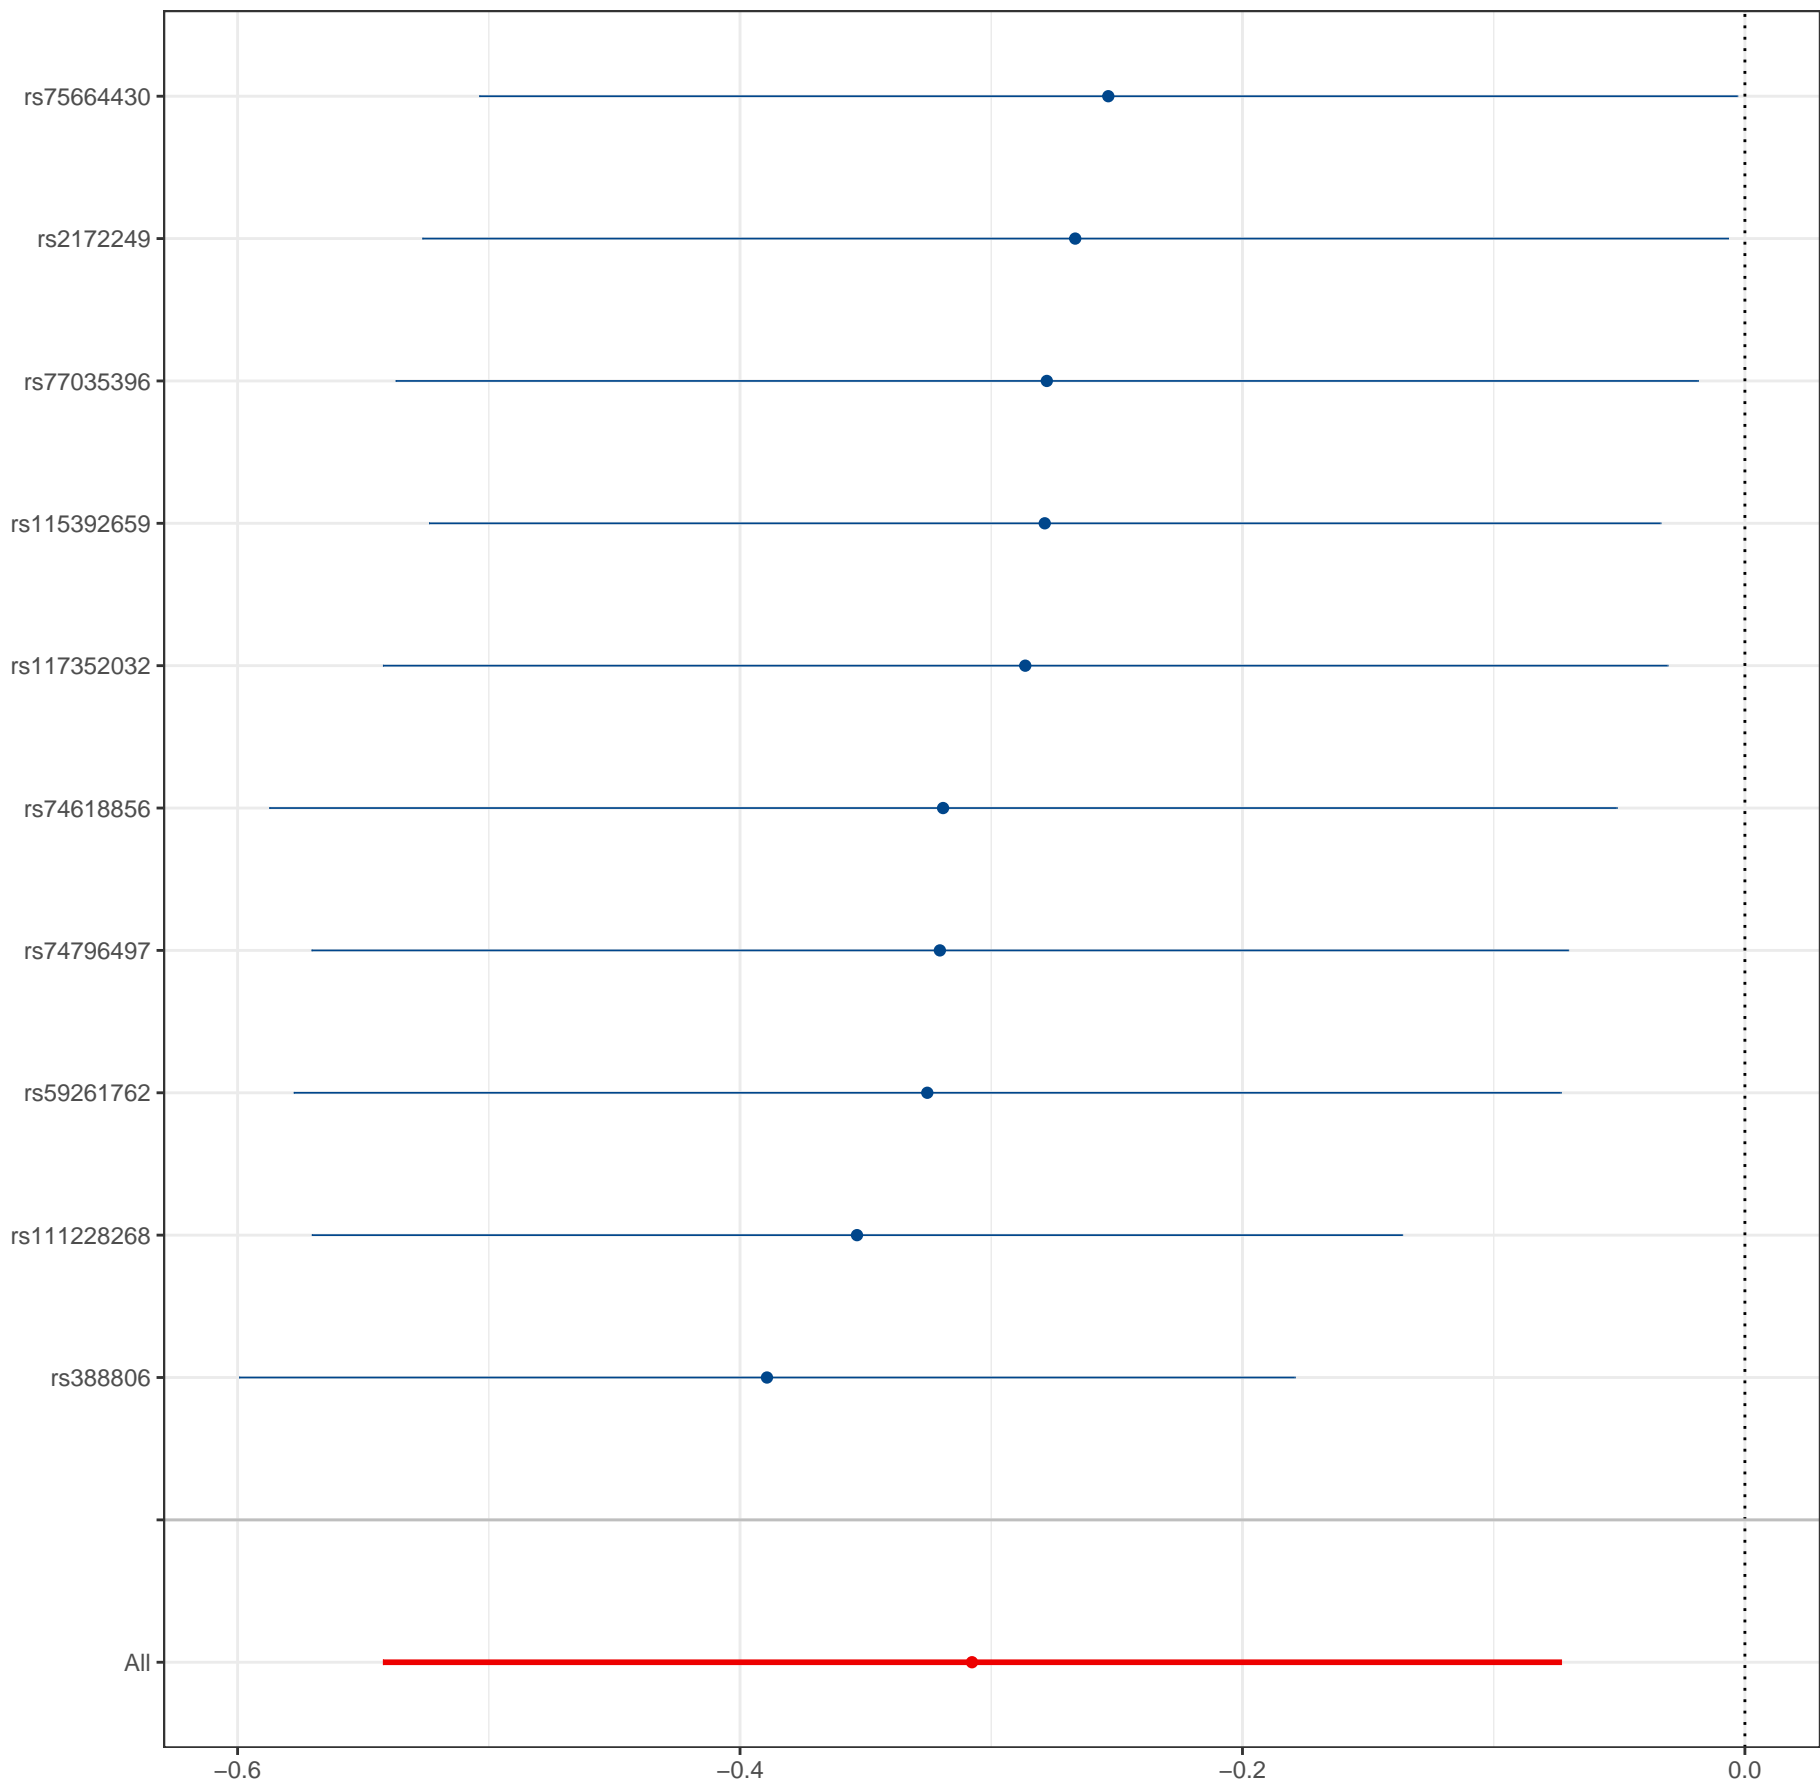

MR leave-one-out sensitivity analysis for 'Cholate to phosphate ratio' on 'Parkinson's disease || id:ieu-b-7'



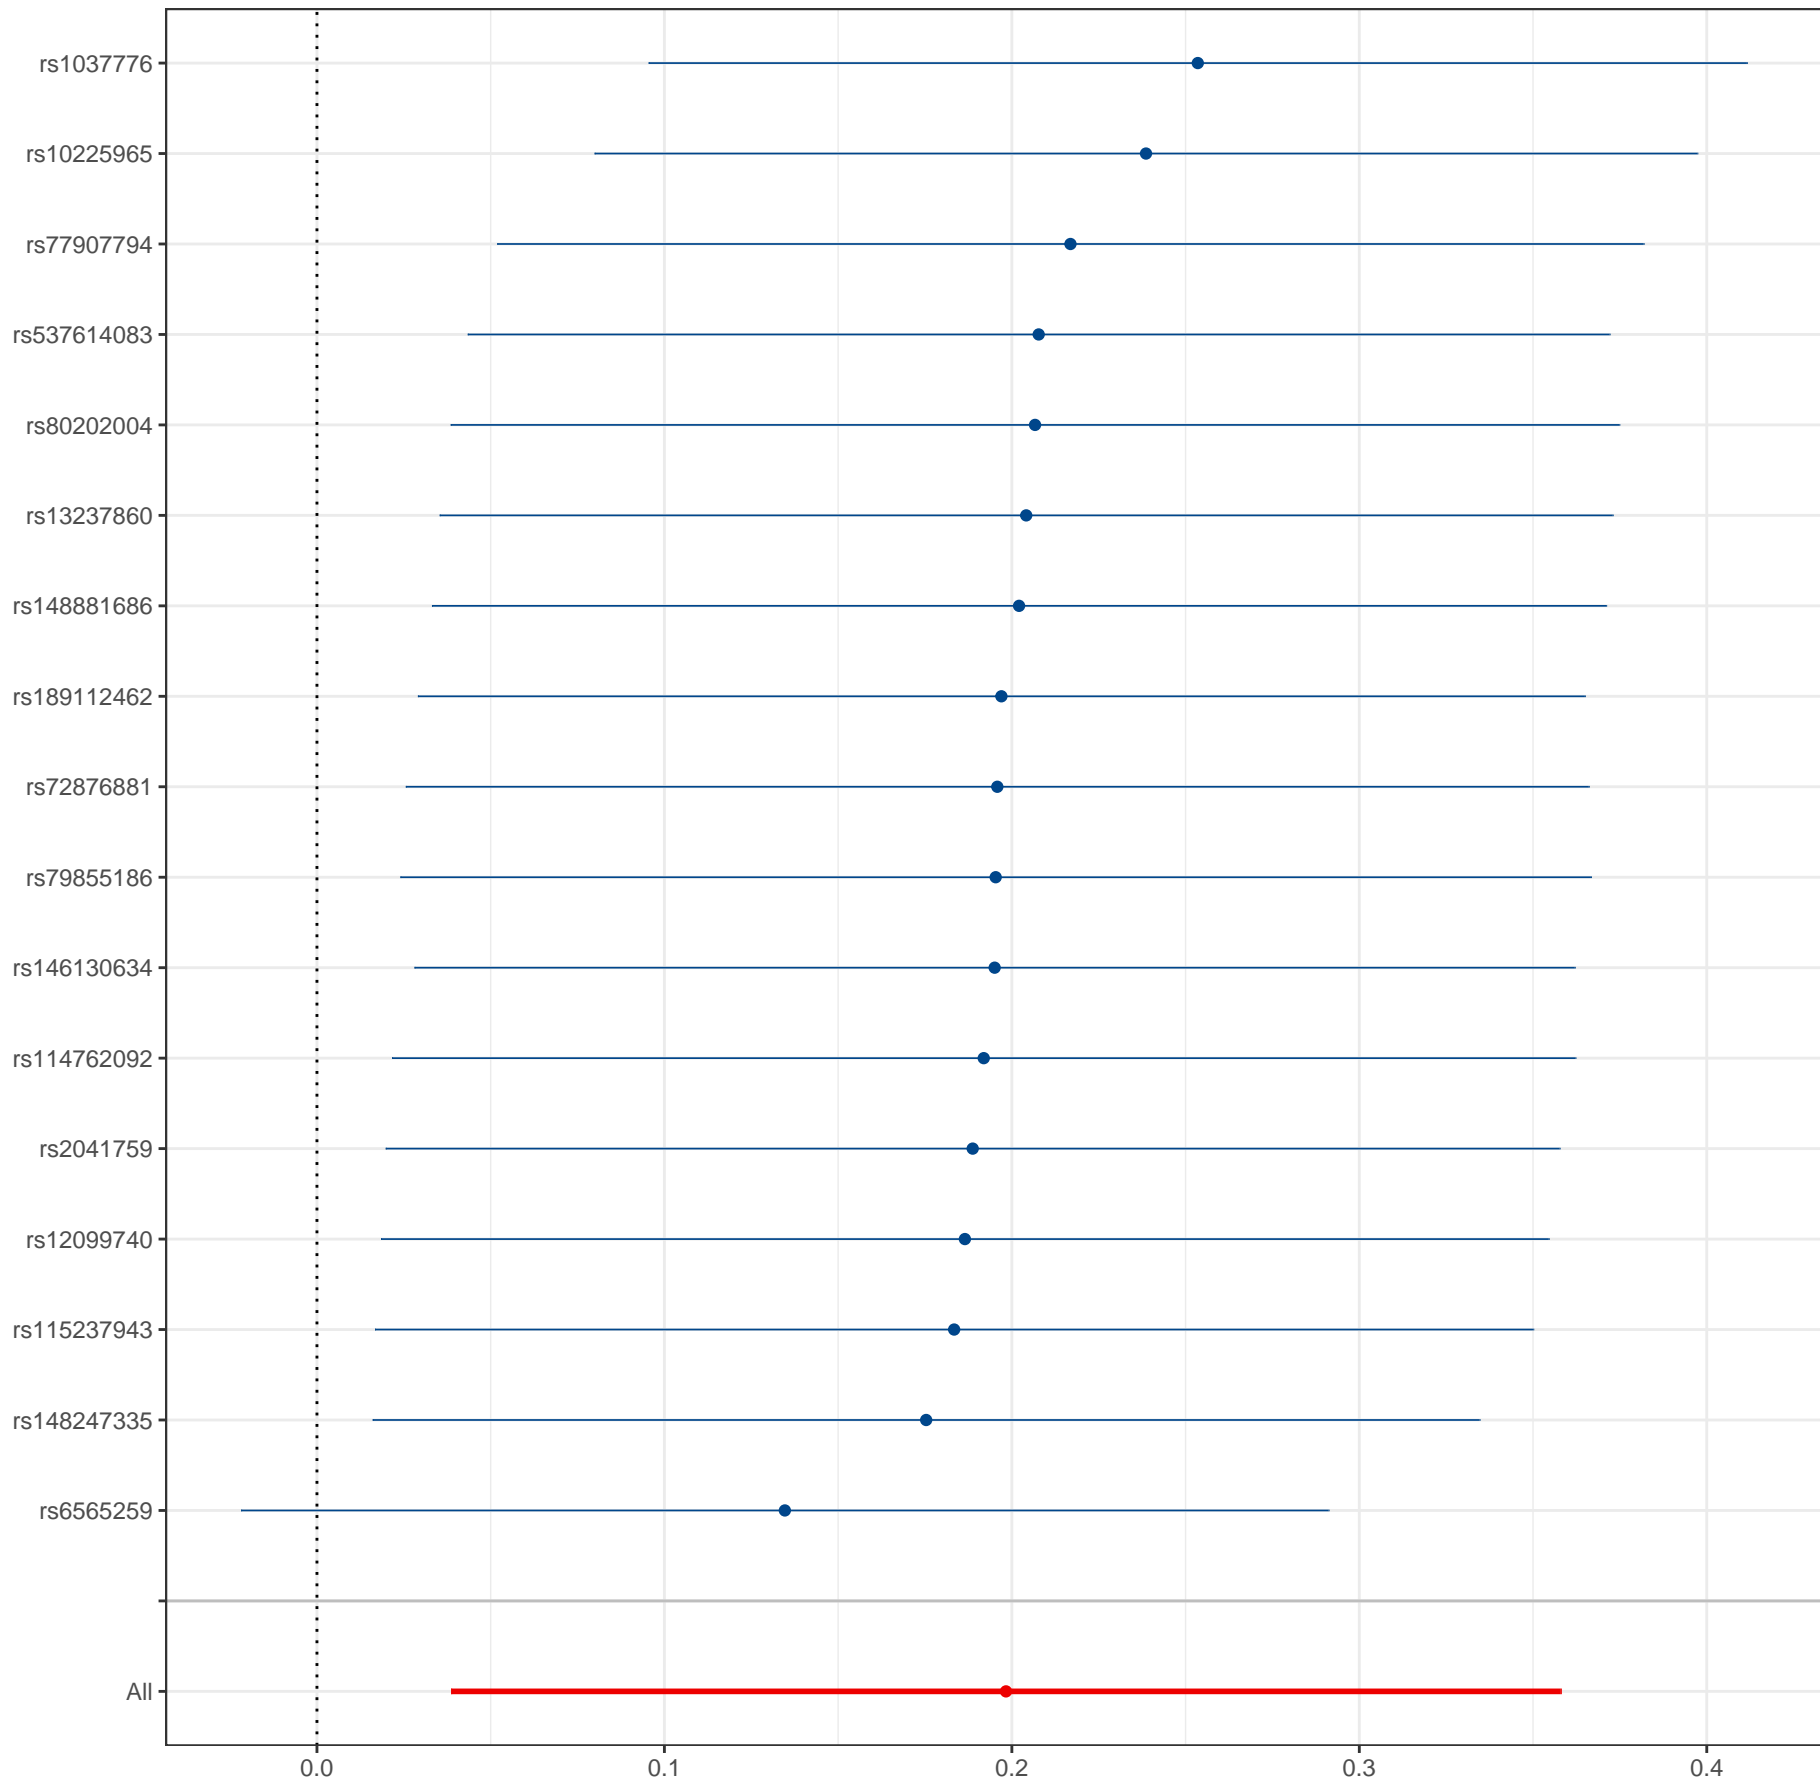

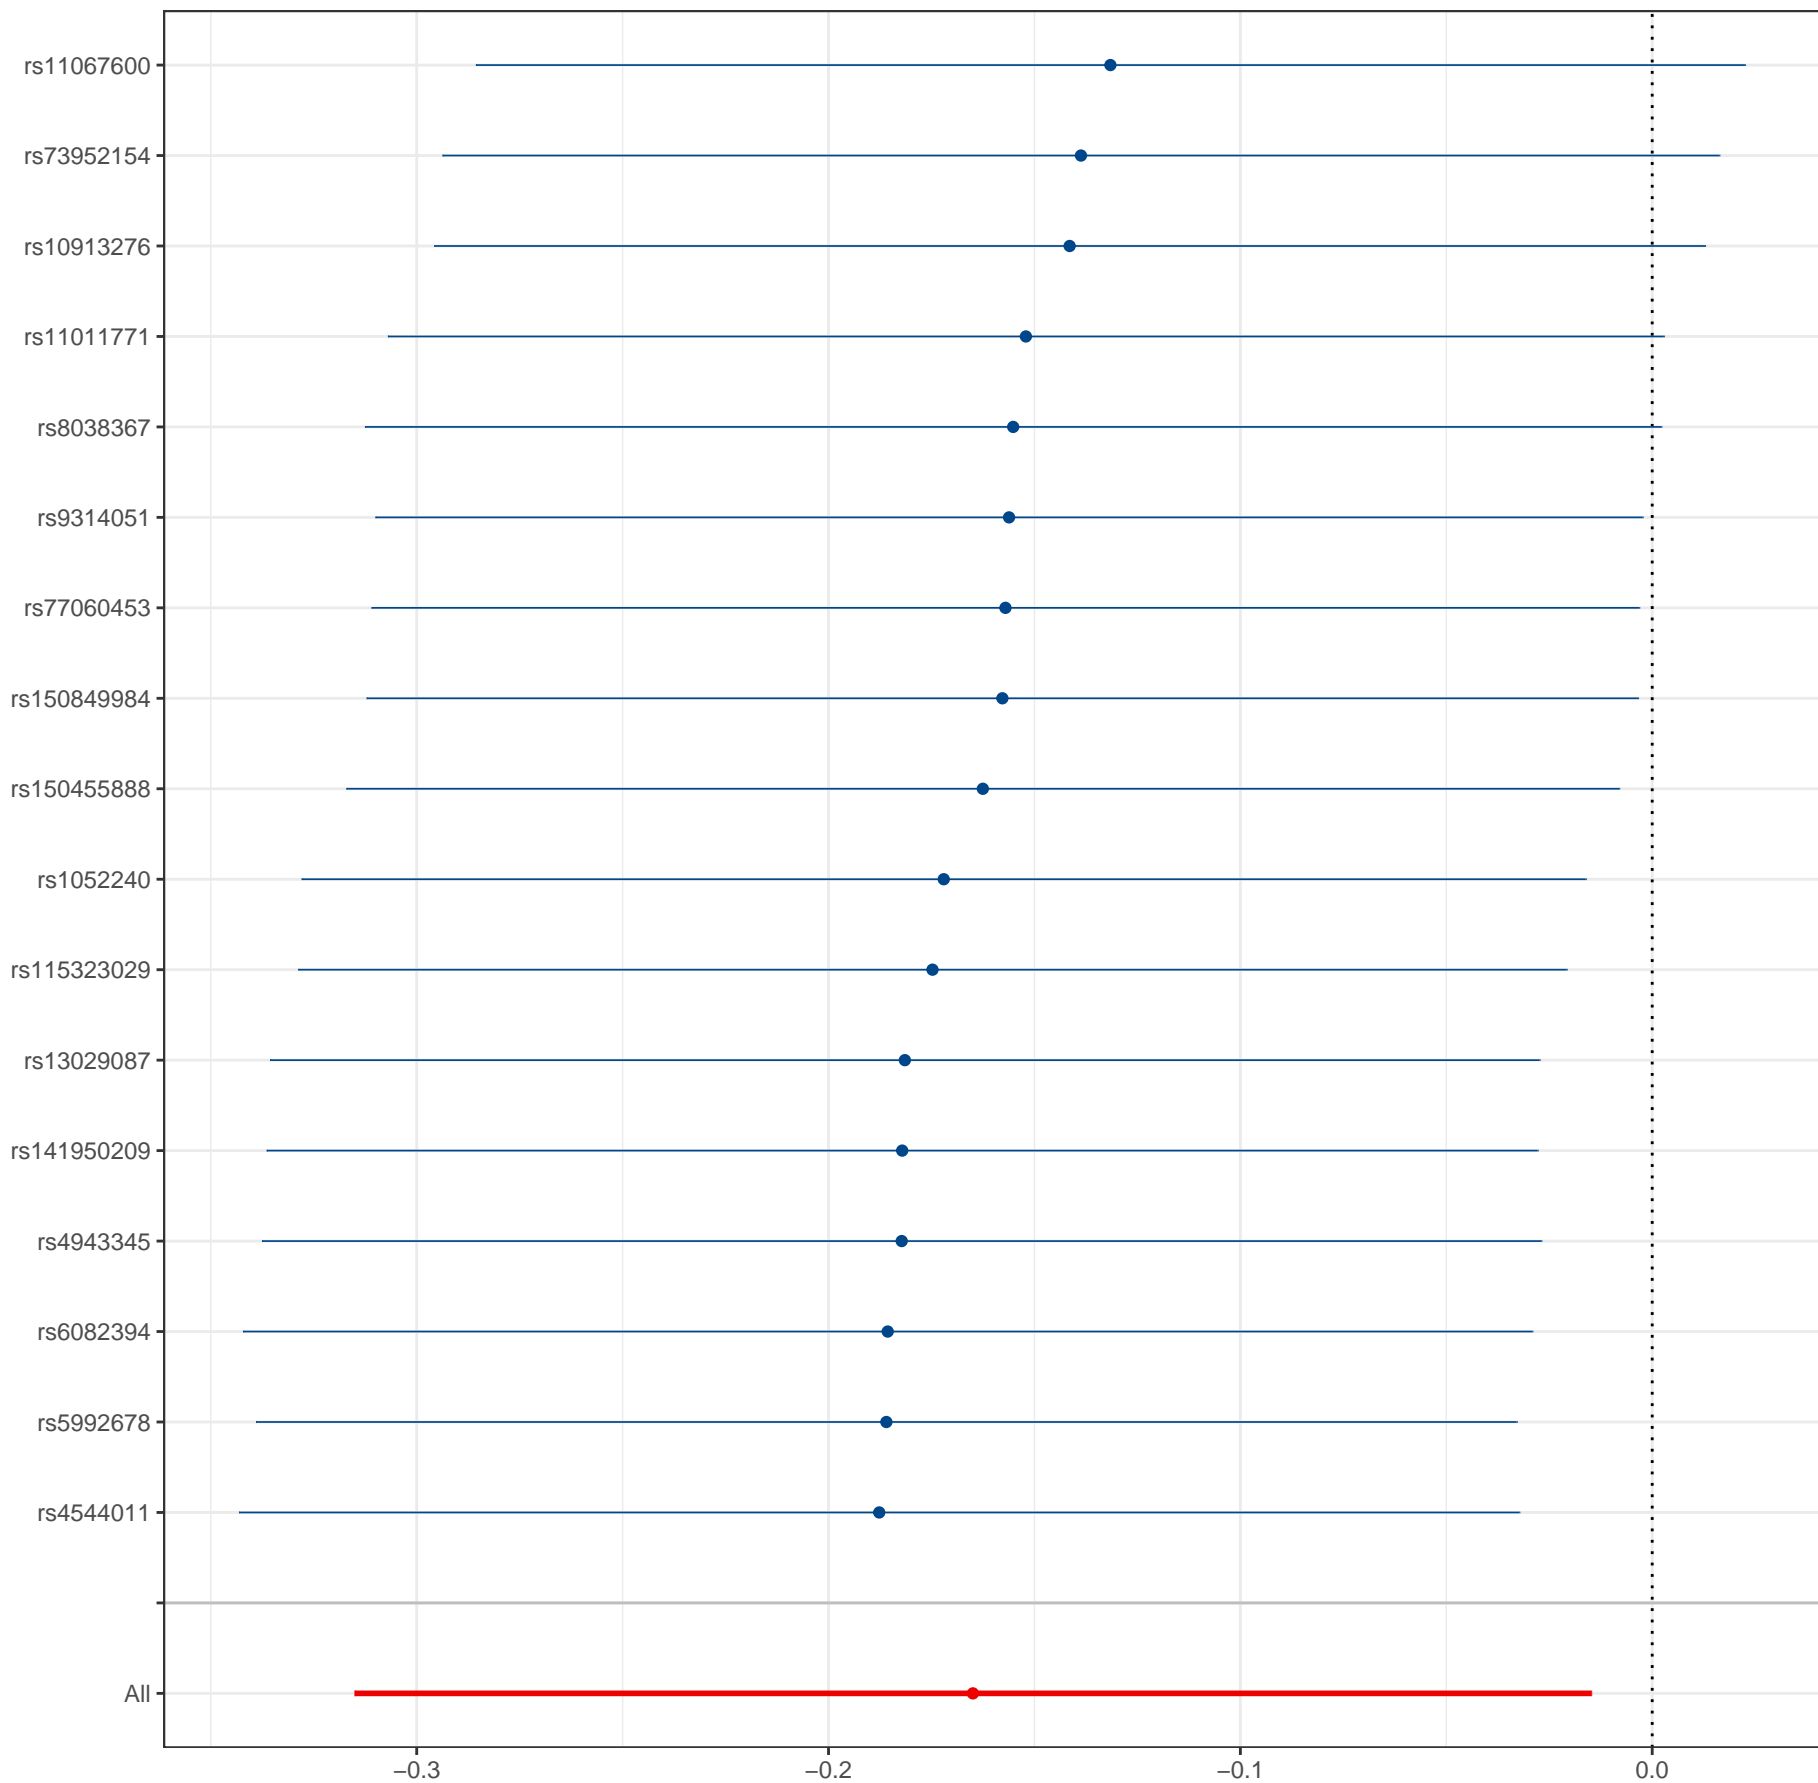

MR leave-one-out sensitivity analysis for 'Glycerol to mannitol to sorbitol ratio' on 'Parkinson's disease || id:ieu-b-7'

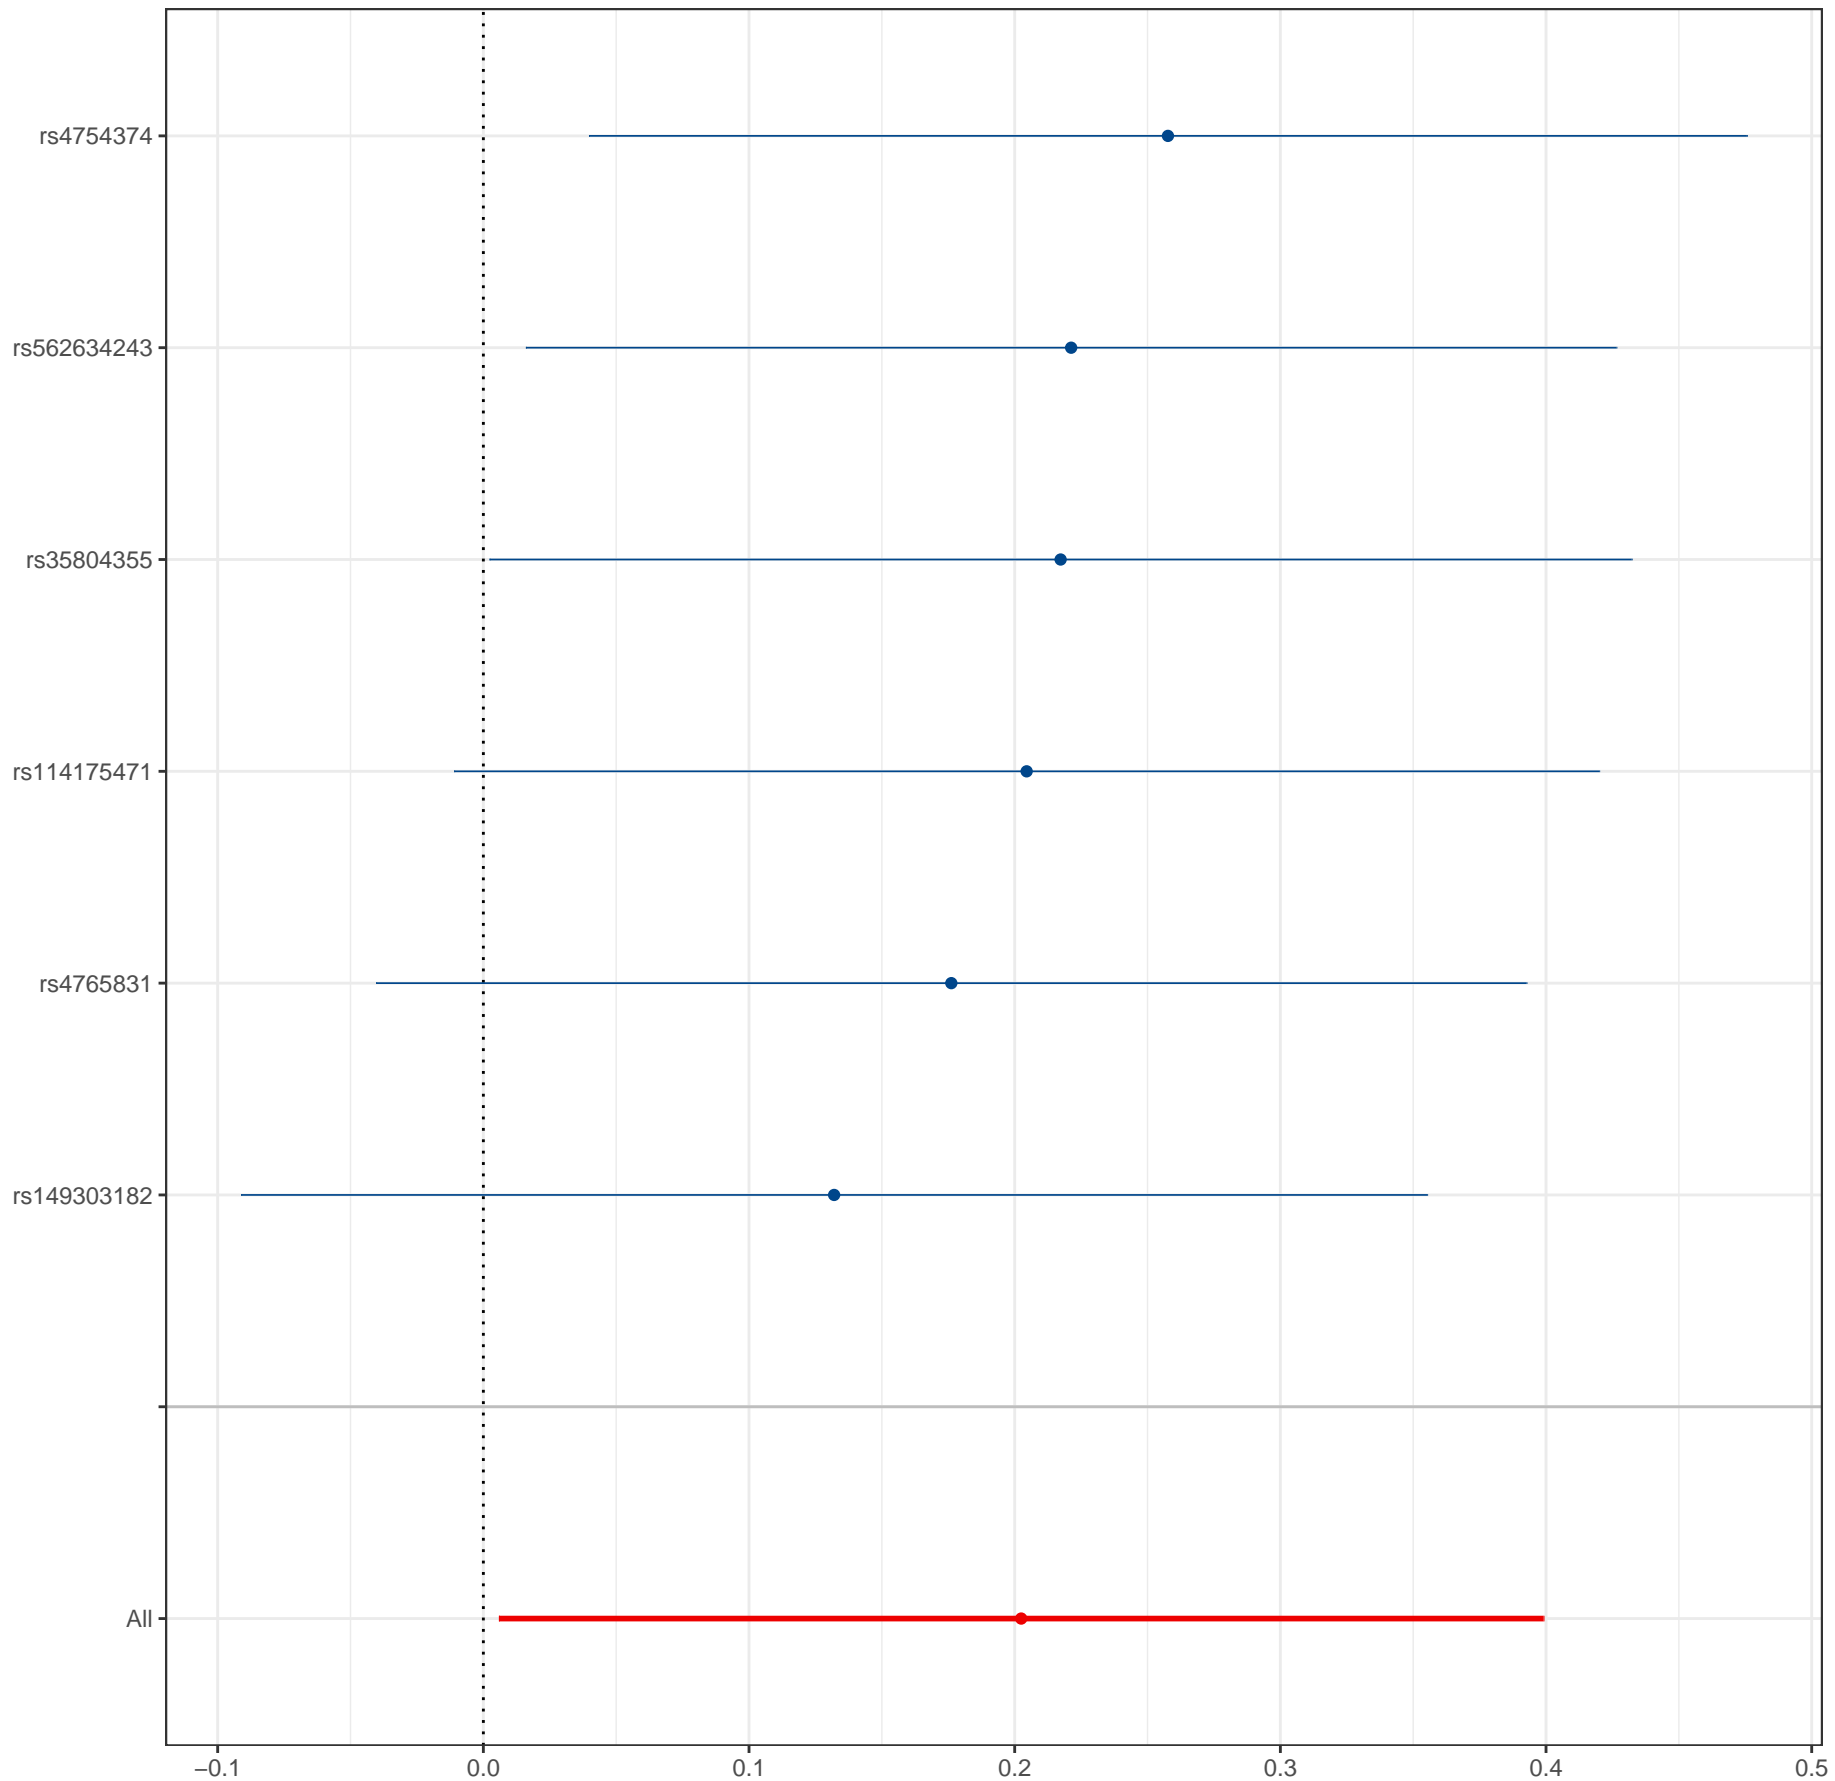

MR leave-one-out sensitivity analysis for 'Adenosine 5'-diphosphate (ADP) to choline ratio' on 'Parkinson's disease || id:ieu-b-7'

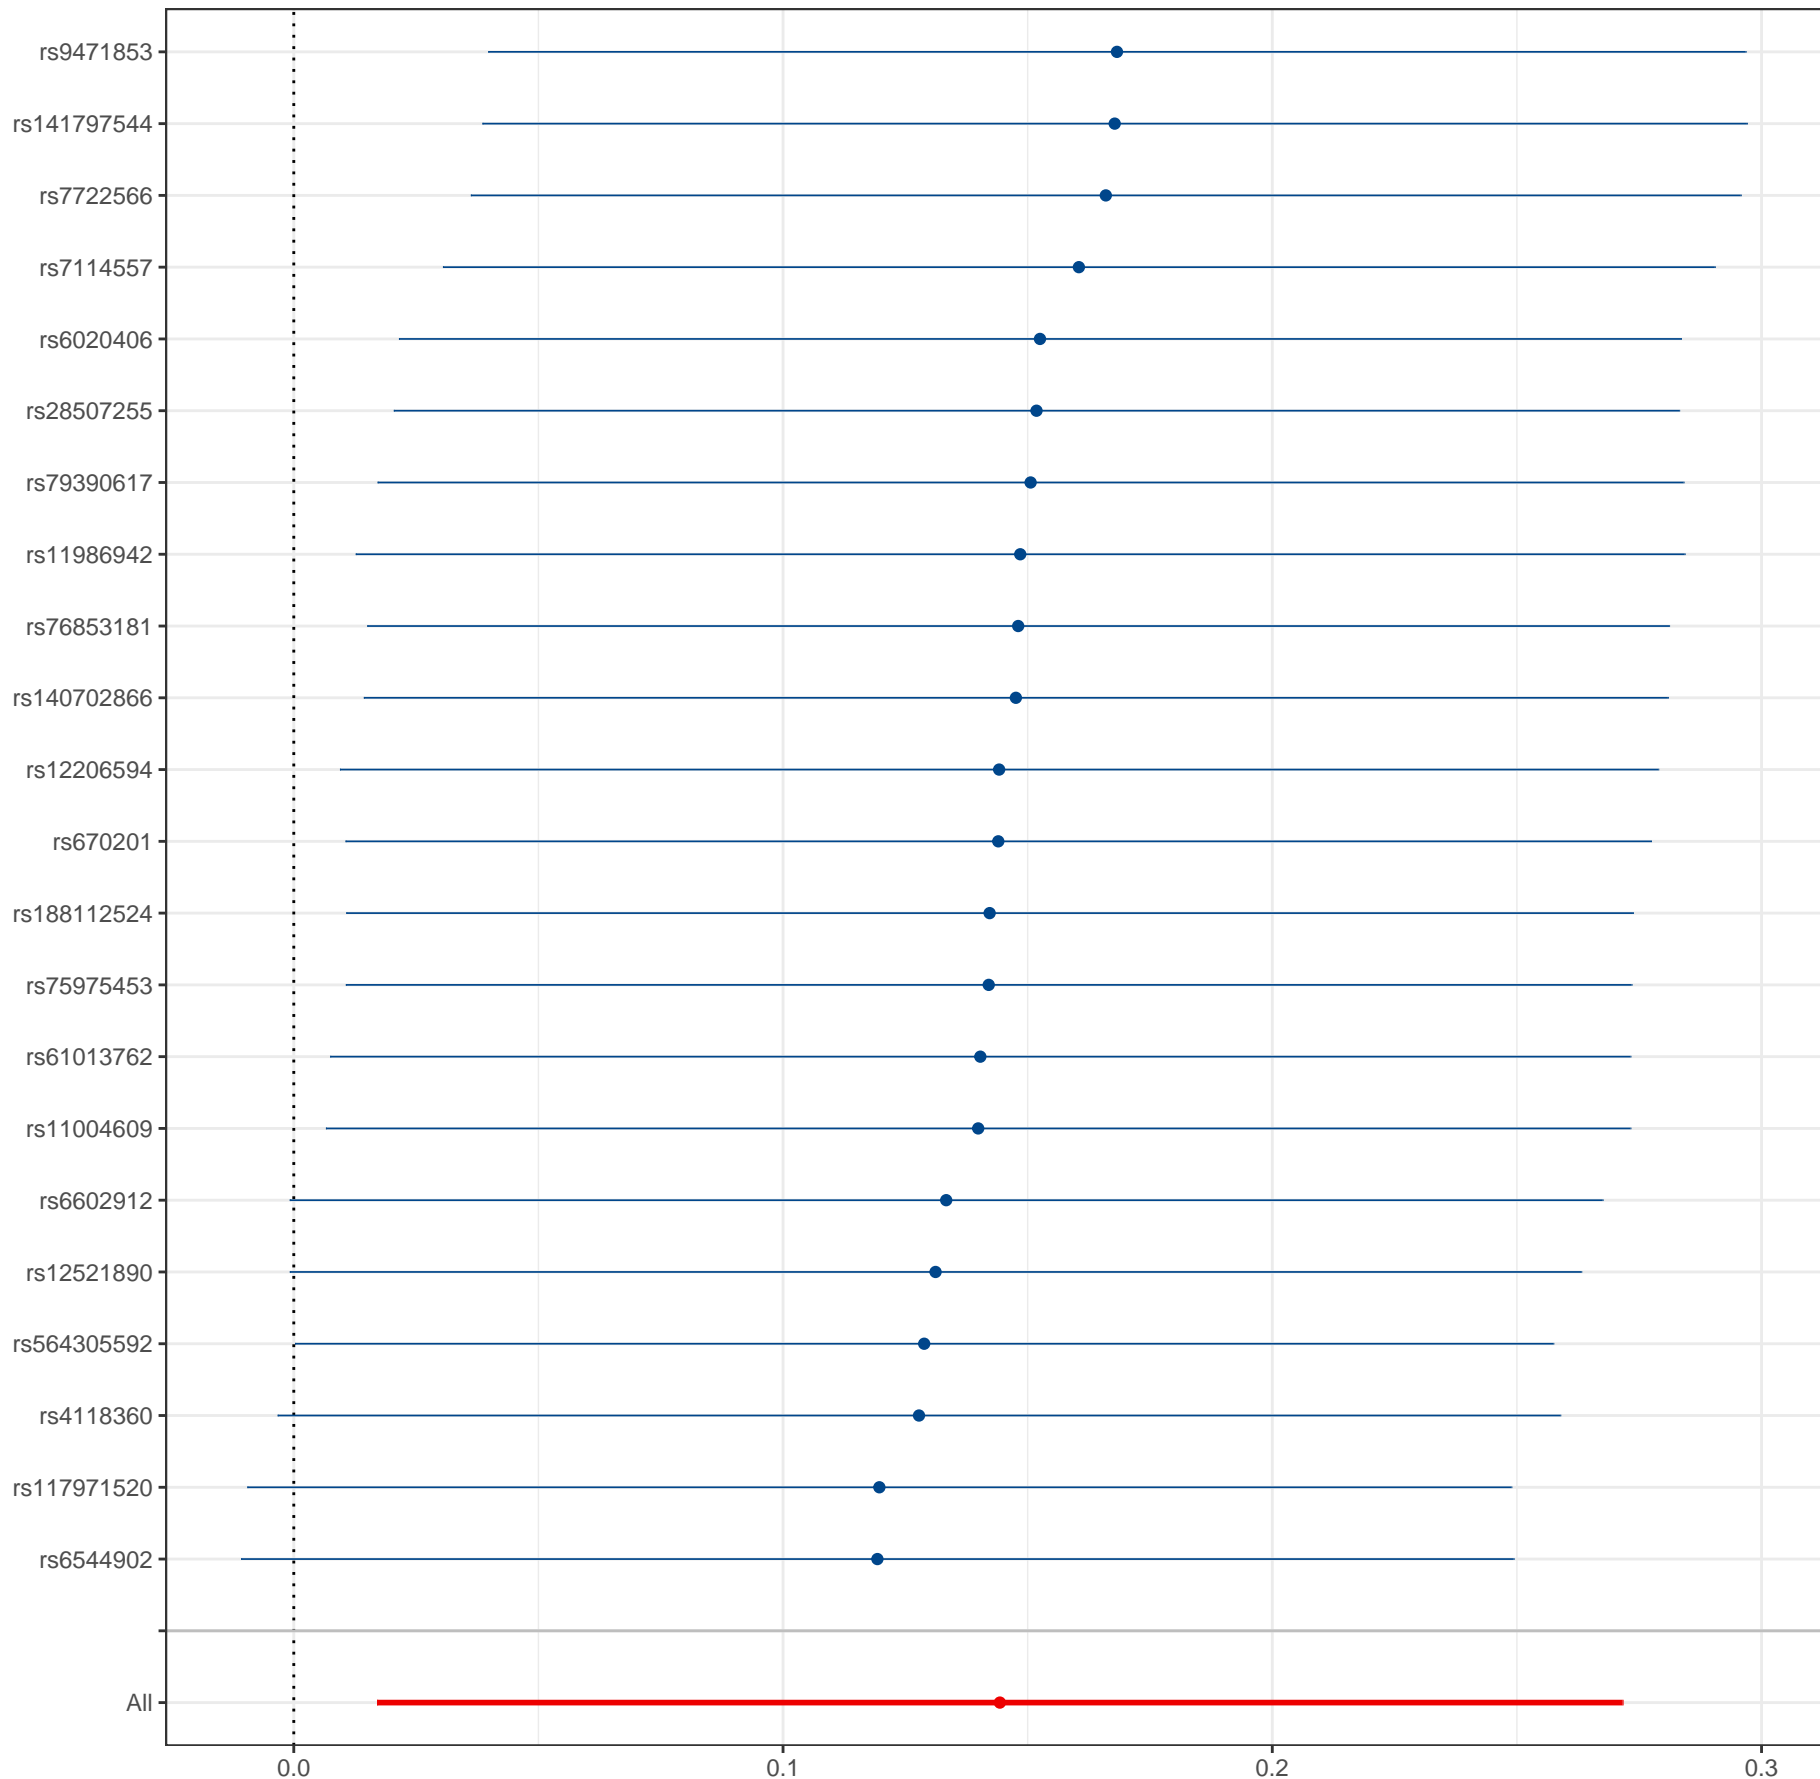

MR leave-one-out sensitivity analysis for 'Benzoate to oleoyl-linoleoyl-glycerol (18:1 to 18:2) [2] ratio' on 'Parkinson's disease || id:ieu-b-7'

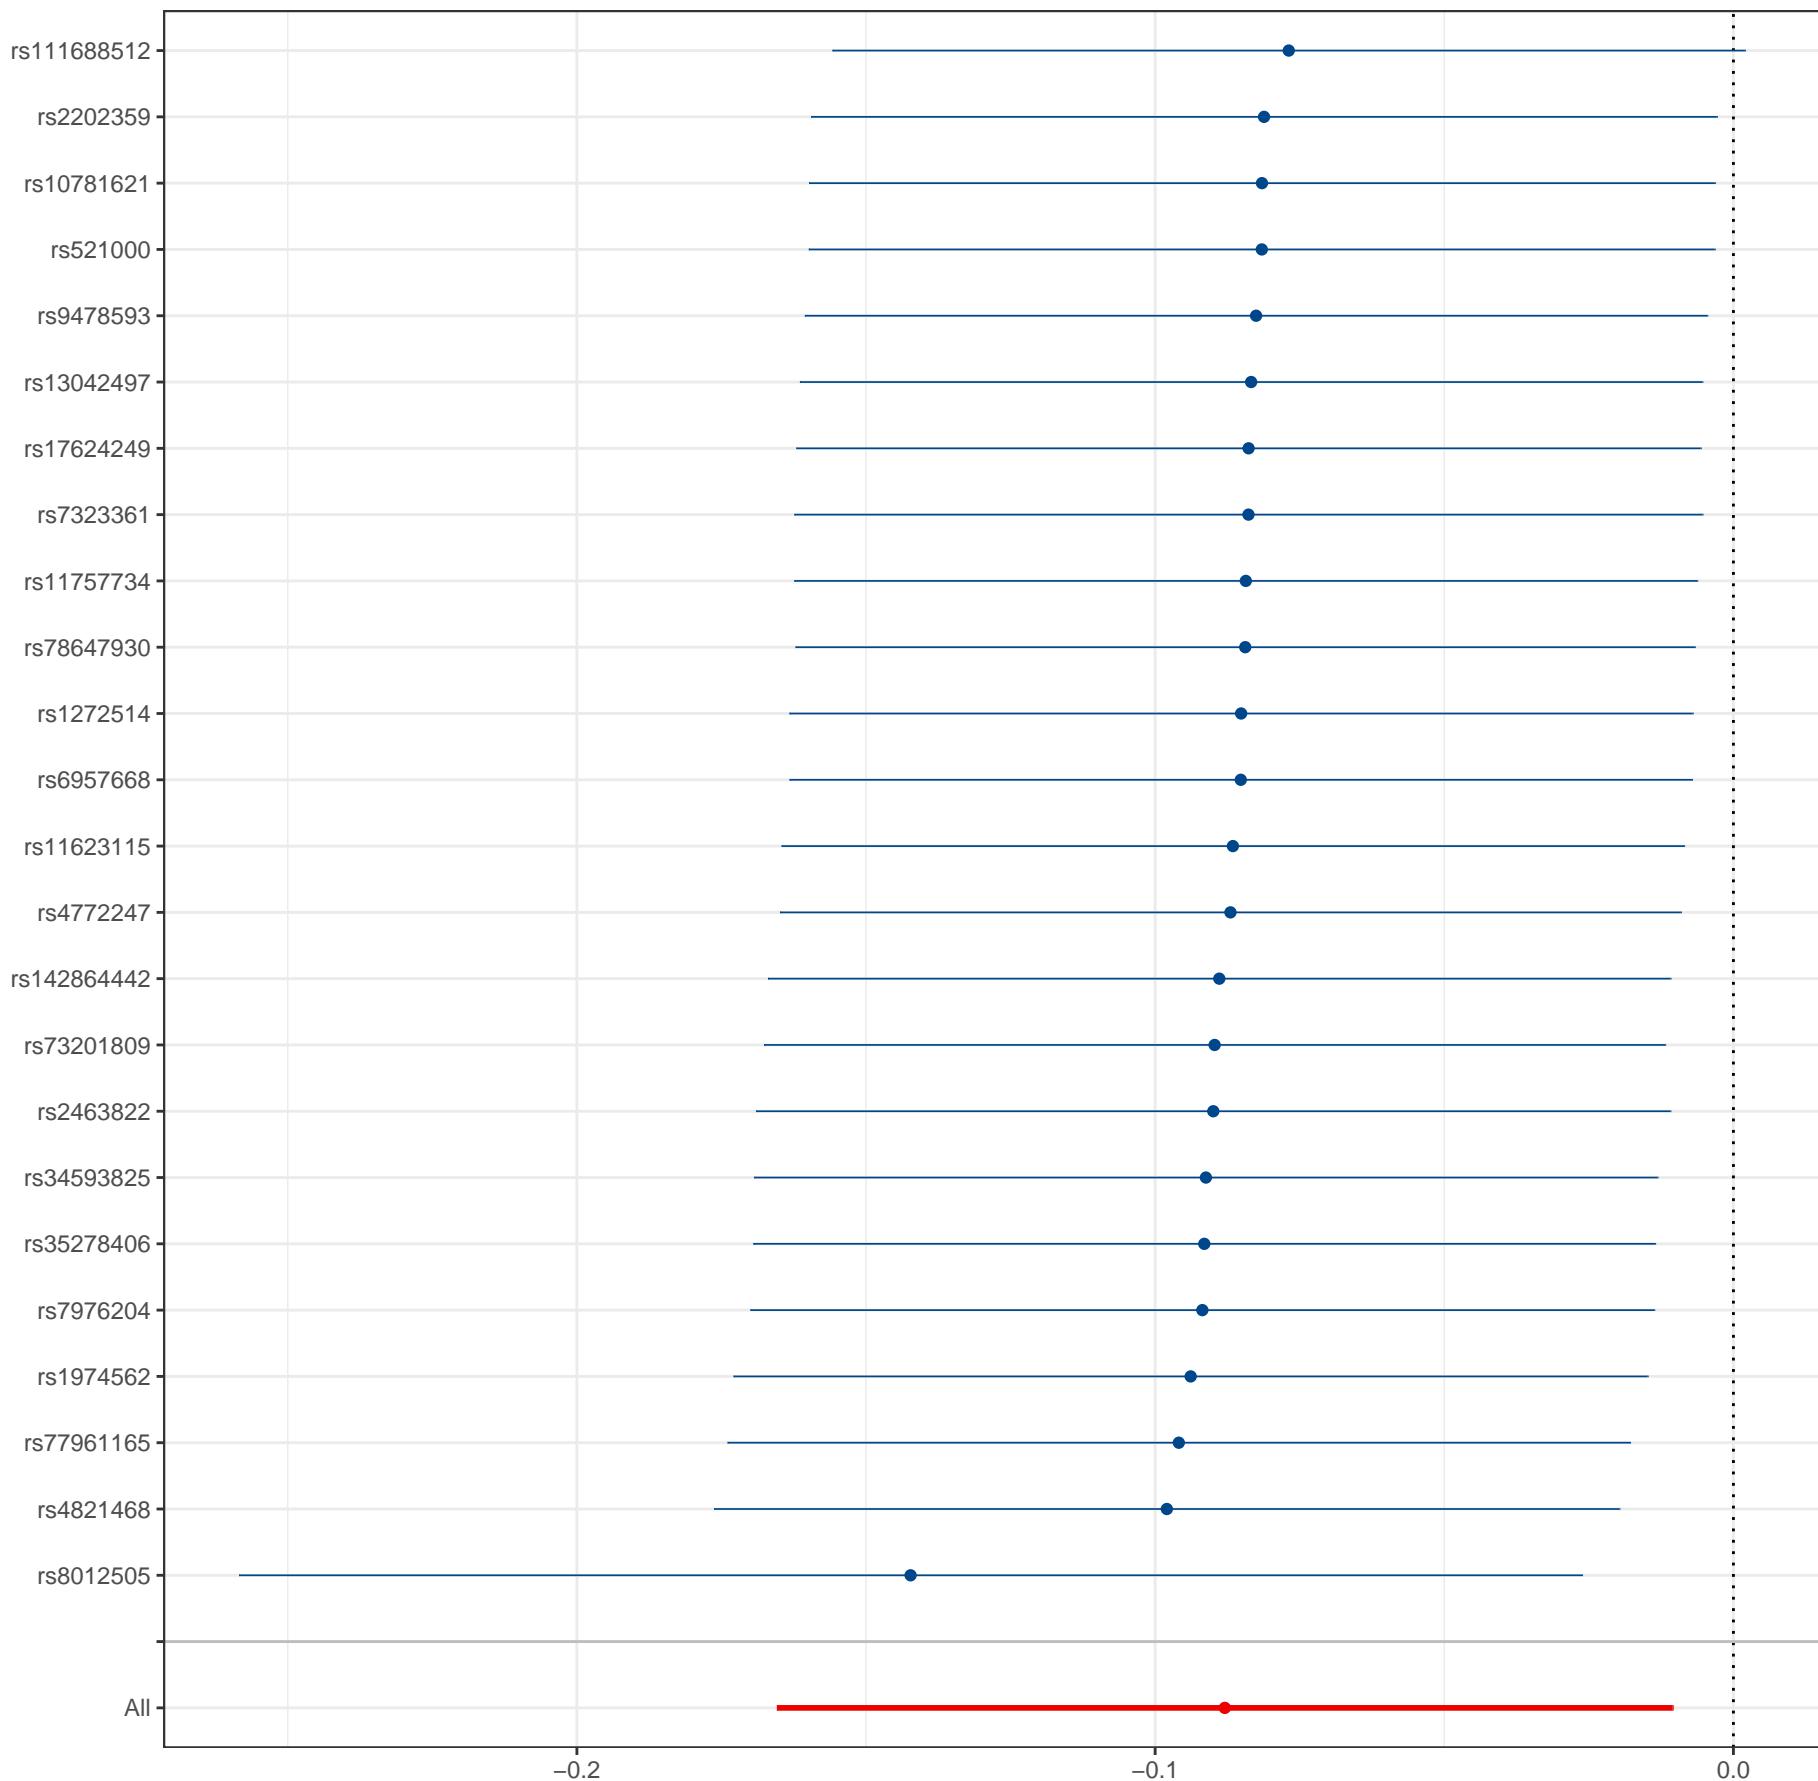

MR leave-one-out sensitivity analysis for  
'Histidine to asparagine ratio' on 'Parkinson's disease || id:ieu-b-7'

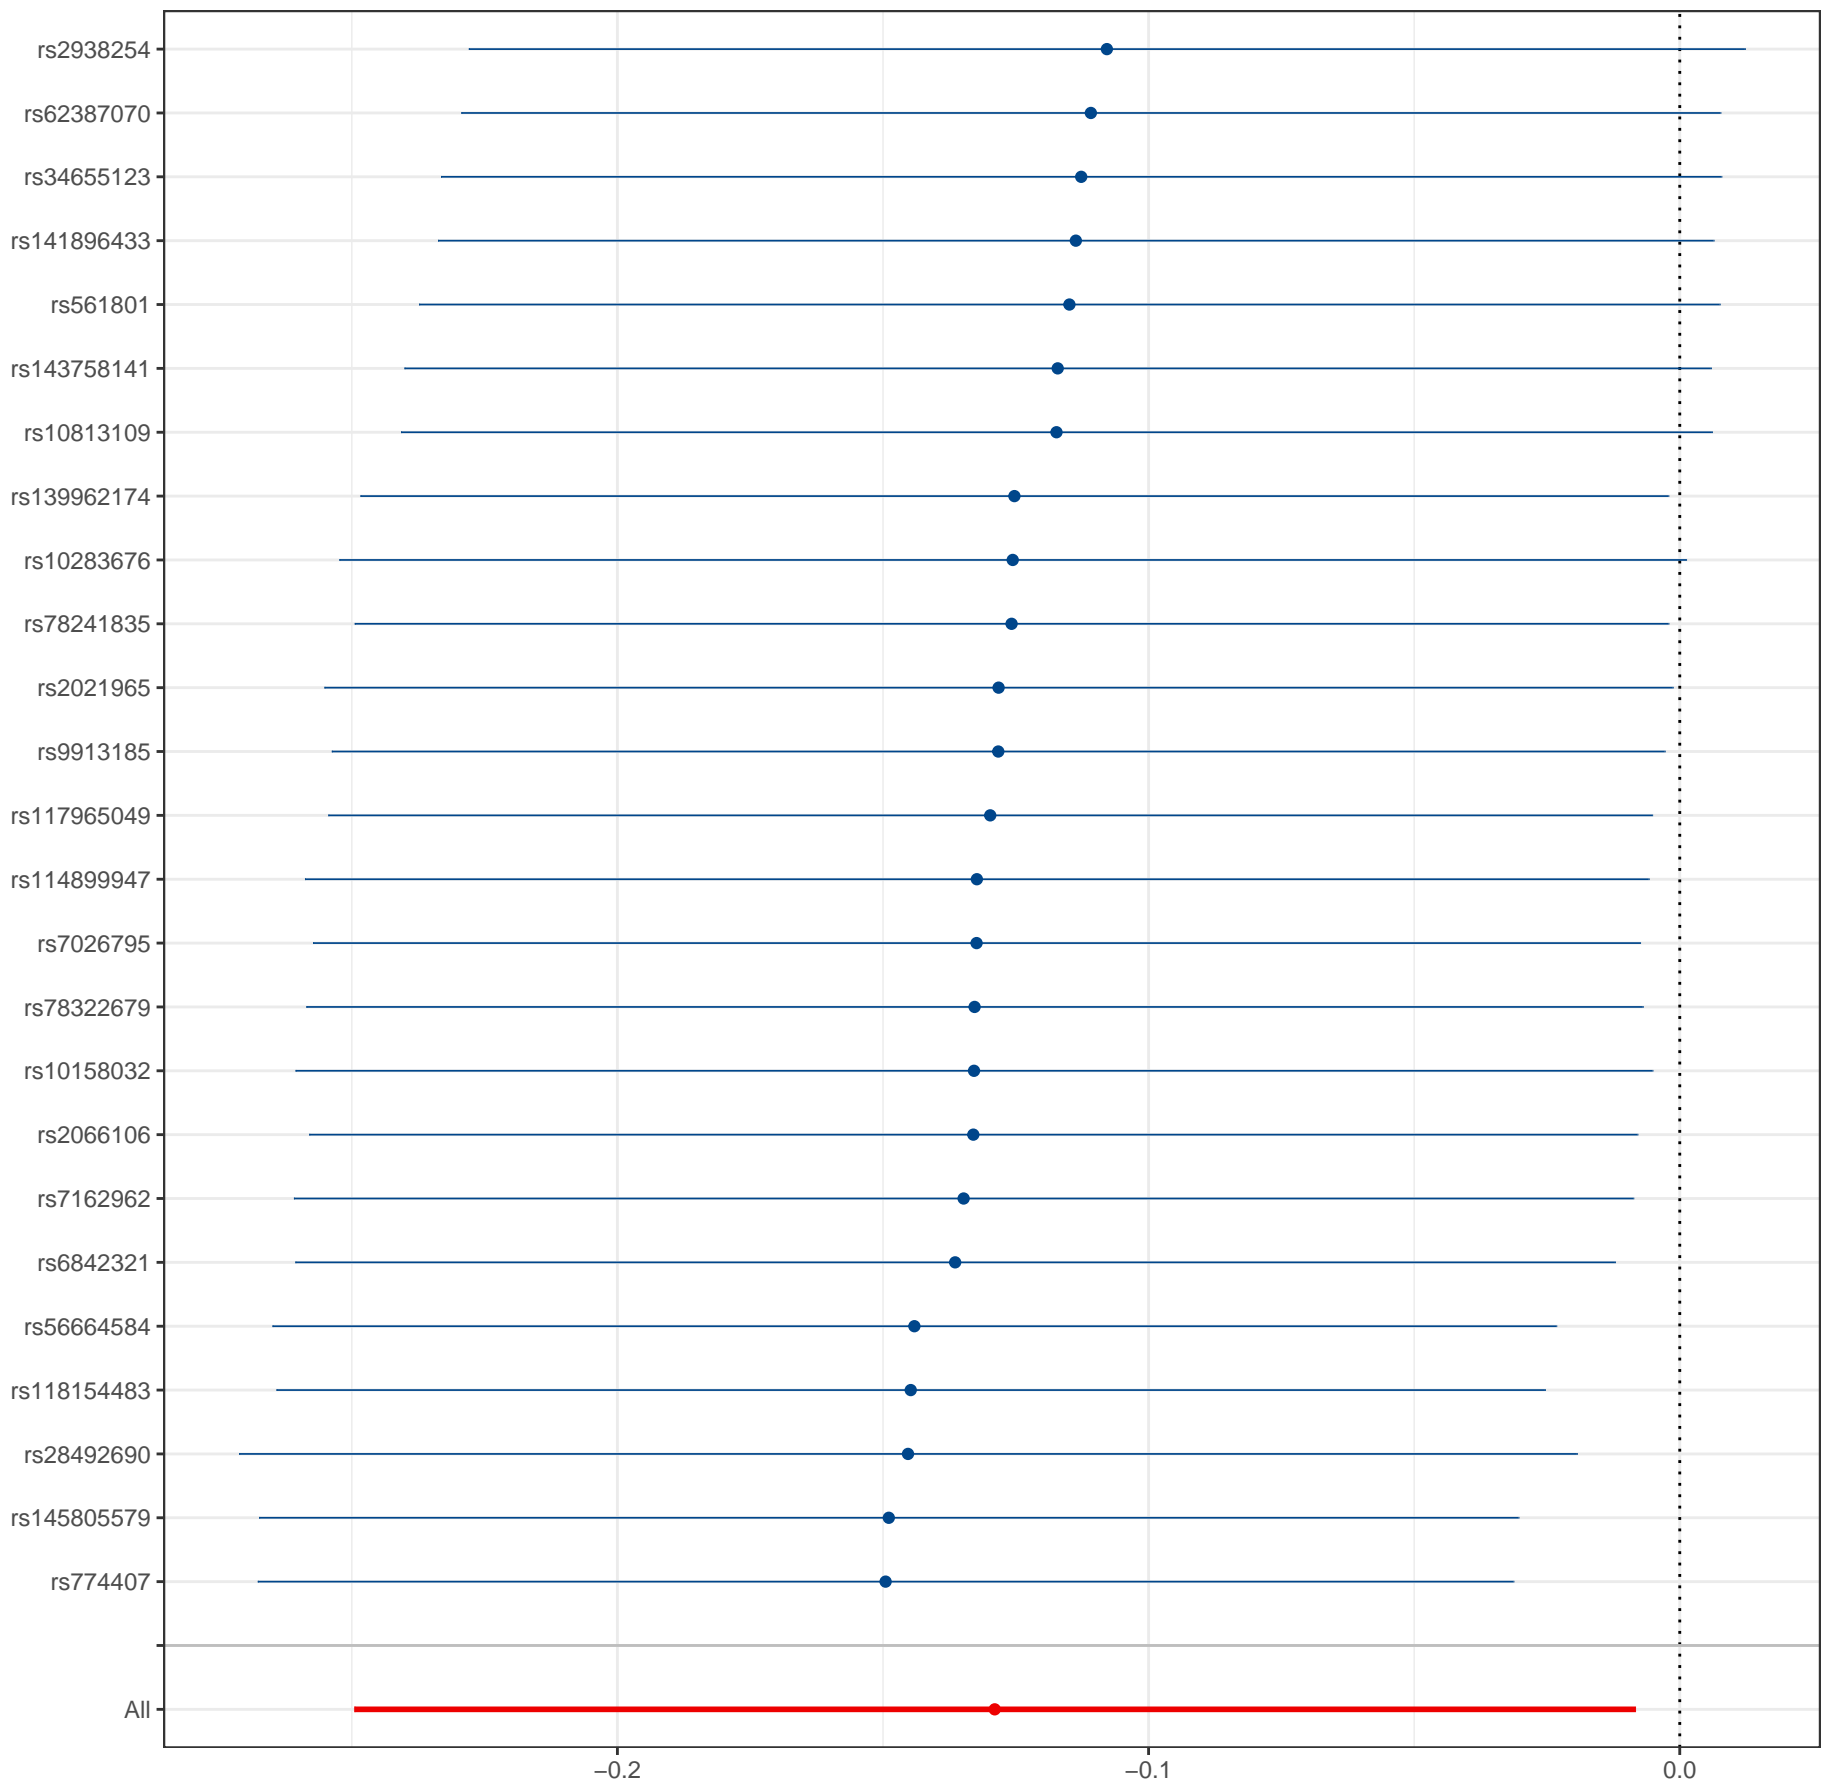

MR leave-one-out sensitivity analysis for 'Alanine to asparagine ratio' on 'Parkinson's disease || id:ieu-b-7'

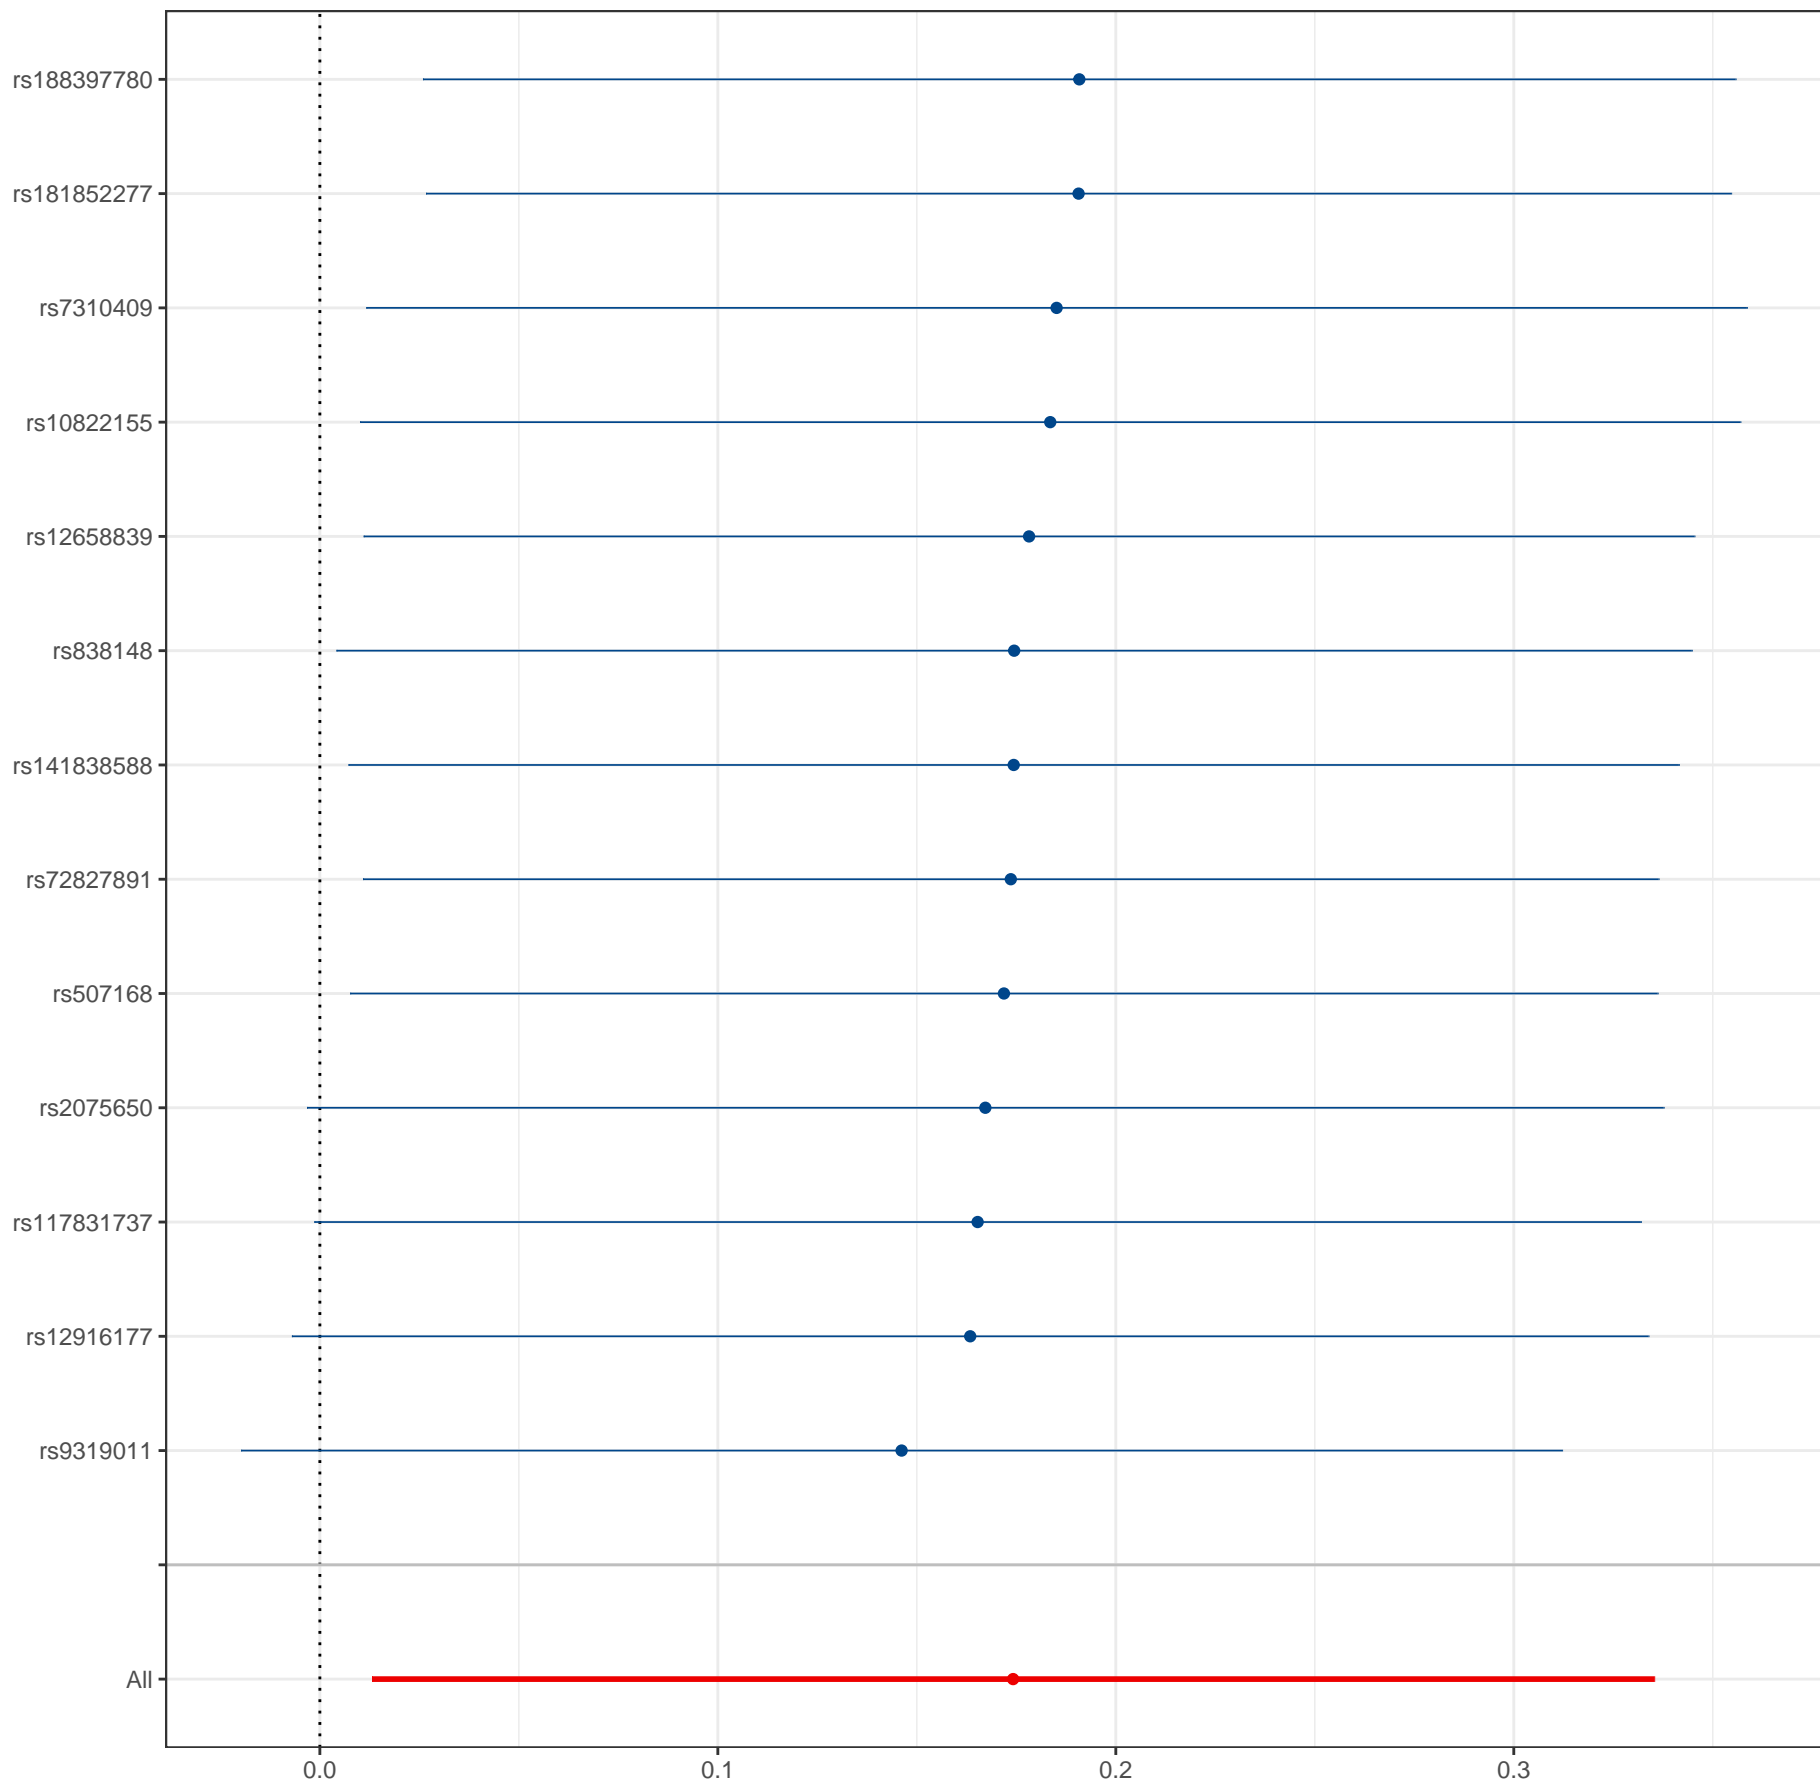

MR leave-one-out sensitivity analysis for 'Glucose to N-stearoyl-sphingosine (d18:1 to 18:0) ratio' on 'Parkinson's disease || id:ieu-b-7'
