# Supplementary material for: Cerebrospinal Fluid and Plasma Metabolites with Parkinson’s Disease: A Mendelian Randomization Study
Source: bioRxiv or medRxiv preprint supplement (doi:10.1101/2024.07.19.24310687), 2024-07-19

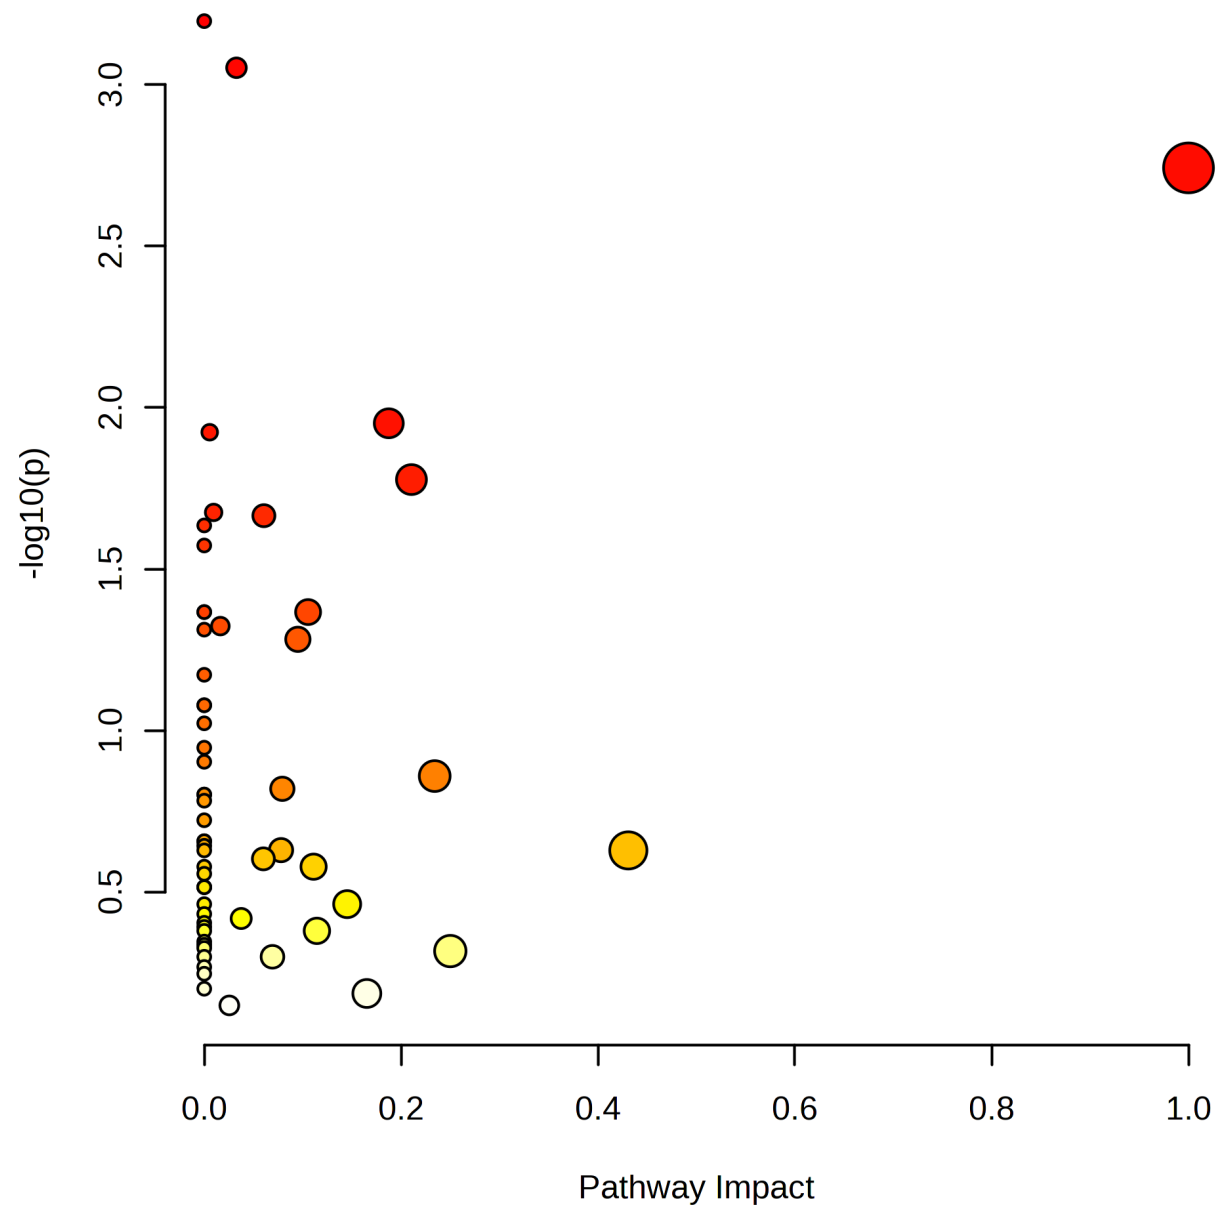

Supplement: Supplementary file [file media-9.pdf]
